# Supplementary material for: Integrated Metabolome and Transcriptome Analyses Reveal Amino Acid Biosynthesis Mechanisms during the Physiological Maturity of Grains in Yunnan Hulled Wheat (Triticum aestivum ssp. yunnanense King)
Source: Int J Mol Sci. 2023 Aug 30;24(17):13475. doi: 10.3390/ijms241713475 (PMC10487551; doi:10.3390/ijms241713475)
Supplement: Supplementary file 1 [file ijms-24-13475-s001.zip]

Archive with 15 entries (15 files):
- Figures S1-S6.pdf
- Table S1.xlsx
- Table S10.xlsx
- Table S11.xlsx
- Table S12.xlsx
- Table S13.xlsx
- Table S14.xlsx
- Table S2.xlsx
- Table S3.xlsx
- Table S4.xlsx
- Table S5.xlsx
- Table S6.xlsx
- Table S7.xlsx
- Table S8.xlsx
- Table S9.xlsx
