# Supplementary material for: Integrated Metabolome and Transcriptome Analyses Reveal Amino Acid Biosynthesis Mechanisms during the Physiological Maturity of Grains in Yunnan Hulled Wheat (Triticum aestivum ssp. yunnanense King)
Source: Int J Mol Sci. 2023 Aug 30;24(17):13475. doi: 10.3390/ijms241713475 (PMC10487551; doi:10.3390/ijms241713475)
Supplement: Supplementary file 1 [file ijms-24-13475-s001.zip › Table S1.xlsx]

## Sheet: Table S1
Table S1. Primers of sequences for qRT-PCR analysis.
Gene ID	Primer	Primer sequence (5'to3')	Base number	Total OD value
gene:TraesCS3D02G331500	gene-LOC109757391F	ATGGTGTCGTATAGGTATG	19	2
	gene-LOC109757391R	TTGATCTGTCCAGTTGTT	18	2
gene:TraesCS5B02G131500	gene-LOC109778717F	TACGAGAATCCCAAGAAC	18	2
	gene-LOC109778717R	CTTCCACCATGAAAGTTG	18	2
gene:TraesCS5D02G181600	gene-LOC109754694F	ACCTGCTGAGATAATAGT	18	2
	gene-LOC109754694R	CCTAACAAGAGAACCAAT	18	2
gene:TraesCS5D02G407800	gene-LOC109743487F	ATGGCTATAATGAGGAAGAG	20	2
	gene-LOC109743487R	ATCGTAGGAACCCGTATA	18	2
gene:TraesCS4D02G356200	gene-LOC109762640F	CCACTCCAGCAATAGAAG	18	2
	gene-LOC109762640R	CTTTACTCTCGGCAACTT	18	2
gene:TraesCS6A02G218300	gene-LOC109742996F	GAATAAGACGGTTAATGG	18	2
	gene-LOC109742996R	CTTCATCATCAAGAACAC	18	2
gene:TraesCS3A02G310300	gene-LOC109772860F	CATCTTCACATCTACCAT	18	2
	gene-LOC109772860R	GTCACCATCAATAATCCT	18	2
gene:TraesCS6A02G305400	gene-LOC109761205F	ATGCCTTCAGTTGCTCAA	18	2
	gene-LOC109761205R	CCTCAAGACACTACTCTCATT	21	2
gene:TraesCS1D02G188500	gene-LOC109744157F	ATCAAGGAGATCGAGAAAT	19	2
	gene-LOC109744157R	TCATTGCAGATCGTAGAC	18	2
gene:TraesCS3D02G286900	gene-LOC109739698F	CTGATCGGCGGGAAGAAG	18	2
	gene-LOC109739698R	TCTGACCACTGCTGTATGAA	20	2
gene:TraesCS4D02G047400	gene-LOC109764334F	ATCCTGATGTCAAGGCTGAA	20	2
	gene-LOC109764334R	AGTTGGTGTCCTTCTGAAGAA	21	2
gene:Internal reference	26S-F	GCTGGCTCGTTCAACTGATG	20	2
	26S-R	GGACCAAGCGTTCTGATTACTC	22	2
