# Supplementary material for: Integrated Metabolome and Transcriptome Analyses Reveal Amino Acid Biosynthesis Mechanisms during the Physiological Maturity of Grains in Yunnan Hulled Wheat (Triticum aestivum ssp. yunnanense King)
Source: Int J Mol Sci. 2023 Aug 30;24(17):13475. doi: 10.3390/ijms241713475 (PMC10487551; doi:10.3390/ijms241713475)
Supplement: Supplementary file 1 [file ijms-24-13475-s001.zip › Table S2.xlsx]

## Sheet: Table S2
Table S2. Comparison of grain protein content from 2019 to 2021 of two Yunnan hulled wheat lines in Yunnan Province.
Year	Y line			D line
2019BS	17.12	17.18	17.23	13.7	13.74	13.79
2020XD	16.98	17.01	17.03	14.1	13.82	14.29
2021XD	17.51	17.51	17.6	14.74	14.75	14.75
Note:BS and XD refer to Baoshan and Xundian,respectively .
