# Supplementary material for: Integrated Metabolome and Transcriptome Analyses Reveal Amino Acid Biosynthesis Mechanisms during the Physiological Maturity of Grains in Yunnan Hulled Wheat (Triticum aestivum ssp. yunnanense King)
Source: Int J Mol Sci. 2023 Aug 30;24(17):13475. doi: 10.3390/ijms241713475 (PMC10487551; doi:10.3390/ijms241713475)
Supplement: Supplementary file 1 [file ijms-24-13475-s001.zip › Table S3.xlsx]

## Sheet: Table S3
Table S3. Grain size(mm),Fresh weight (g/TKW), dry weight (g/TKW) and moisture content (%) of two Yunnan hulled wheat during grain developmental and maturity .
Size	Waxy grain (WG)			Mature grain (MG)
D-Length	6.84	6.84	6.87	6.31	6.33	6.34
Y-Length	6.51	6.51	6.52	5.4	5.36	5.38
D-Width	3.76	3.75	3.74	2.83	2.84	2.81
Y-Width	3.78	3.77	3.78	2.76	2.76	2.75
DPA	Moisture content - D			Moisture content - Y
7	75.6798	76.3079	75.0572	74.954	74.3043	74.1541
14	70.2857	70.6361	70.2007	70.8436	70.1378	69.6638
21	63.097	63.3026	62.8408	62.3077	62.4443	61.6601
28	56.9667	56.7826	56.368	52.7372	53.0121	54.1174
35	47.5533	46.0095	46.5138	37.1064	35.7794	34.3883
42	36.5257	36.2179	35.5286	28.9743	28.8569	28.5922
48	17.5607	17.6274	17.9348	13.3679	14.0518	13.6095
53	13.462	12.5224	14.4344	12.8897	13.3775	13.0605
DPA	Fresh weight- D			Dry weight- D			Fresh weight- Y			Dry weight- Y
7	13.24	13.38	13.11	3.22	3.17	3.27	10.86	10.78	10.64	2.72	2.77	2.75
14	33.25	33.17	33.39	9.88	9.74	9.95	24.42	24.68	24.69	7.12	7.37	7.49
21	47.53	47.66	47.31	17.54	17.49	17.58	35.1	35.92	35.42	13.23	13.49	13.58
28	54.33	54.33	54.02	23.38	23.48	23.57	43.84	43.16	43.96	20.72	20.28	20.17
35	74.59	74.05	74.58	39.12	39.98	39.89	48.59	48.24	47.08	30.56	30.98	30.89
42	76.85	76.73	76.53	48.78	48.94	49.34	48.94	48.55	48.89	34.76	34.54	34.74
48	62.64	62.97	62.56	51.64	51.87	51.34	40.47	40.92	40.56	35.06	35.17	35.04
53	45.09	44.72	45.17	39.02	39.12	38.65	22.12	22.65	22.97	19.49	19.62	19.97
