# Supplementary material for: Integrated Metabolome and Transcriptome Analyses Reveal Amino Acid Biosynthesis Mechanisms during the Physiological Maturity of Grains in Yunnan Hulled Wheat (Triticum aestivum ssp. yunnanense King)
Source: Int J Mol Sci. 2023 Aug 30;24(17):13475. doi: 10.3390/ijms241713475 (PMC10487551; doi:10.3390/ijms241713475)
Supplement: Supplementary file 1 [file ijms-24-13475-s001.zip › Table S4.xlsx]

## Sheet: Table S4
Table S4.Total Amino Acid Content (mg/g,FW) between waxy grain and mature grain in two Yunnan hulled wheat.
Stage	D line			Y line
WG	2.195	2.04	2.245	1.605	1.782	1.695
MG	0.702	0.74	0.809	0.923	1.044	0.994
