# Supplementary material for: Integrated Metabolome and Transcriptome Analyses Reveal Amino Acid Biosynthesis Mechanisms during the Physiological Maturity of Grains in Yunnan Hulled Wheat (Triticum aestivum ssp. yunnanense King)
Source: Int J Mol Sci. 2023 Aug 30;24(17):13475. doi: 10.3390/ijms241713475 (PMC10487551; doi:10.3390/ijms241713475)
Supplement: Supplementary file 1 [file ijms-24-13475-s001.zip › Table S5.xlsx]

## Sheet: Table S5
Table S5. The total amino acids and derivatives compounds between WG and MG in two Yunnan hulled wheat.
Index	Q1 (Da)	Q3 (Da)	Molecular Weight (Da)	Formula	Ionization model	Compounds	Class	CAS	DWG-1	DWG-2	DWG-3	DMG-1	DMG-2	DMG-3	YWG-1	YWG-2	YWG-3	YMG-1	YMG-2	YMG-3	cpd_ID	kegg_map
mws0256	118.09	72.1	117.079	C5H11NO2	[M+H]+	L-Valine*	essential amino acid	72-18-4	2.55 × 106	2.77 × 106	2.40 × 106	1.50 × 106	9.76 × 105	1.23 × 106	1.92 × 106	1.91 × 106	1.96 × 106	1.62 × 106	1.69 × 106	1.76 × 106	C00183	ko00280,ko00290,ko00311,ko00460,ko00770,ko00966,ko00970,ko01100,ko01110,ko01210,ko01230,ko01240,ko02010
mws0230	120.07	74	119.058	C4H9NO3	[M+H]+	L-Threonine*	essential amino acid	72-19-5	1.75 × 106	1.84 × 106	1.62 × 106	1.18 × 106	8.56 × 105	8.94 × 105	2.55 × 106	3.19 × 106	3.17 × 106	2.16 × 106	2.06 × 106	2.25 × 106	C00188	ko00260,ko00261,ko00290,ko00860,ko00970,ko01100,ko01110,ko01230,ko02010
mws0227	132.1	86.2	131.095	C6H13NO2	[M+H]+	L-Leucine*	essential amino acid	61-90-5	9.70 × 106	1.06 × 106	9.56 × 105	7.75 × 105	4.94 × 105	5.67 × 105	7.13 × 105	8.74 × 105	8.19 × 105	6.95 × 105	6.15 × 105	7.26 × 105	C00123	ko00280,ko00290,ko00966,ko00970,ko01100,ko01110,ko01210,ko01230,ko02010
mws0258	132.1	86	131.095	C6H13NO2	[M+H]+	L-Isoleucine*	essential amino acid	73-32-5	1.02 × 106	1.11 × 106	1.08 × 106	8.01 × 105	5.70 × 105	6.26 × 105	8.49 × 105	8.49 × 105	8.44 × 105	7.31 × 105	6.61 × 105	7.89 × 105	C00407	ko00280,ko00290,ko00460,ko00960,ko00966,ko00970,ko01100,ko01110,ko01210,ko01230,ko02010
pme0026	147.11	84	146.106	C6H14N2O2	[M+H]+	L-Lysine*	essential amino acid	56-87-1	5.56 × 104	6.94 × 104	6.01 × 104	1.79 × 104	1.58 × 104	1.56 × 104	5.40 × 104	6.19 × 104	5.89 × 104	5.09 × 104	4.64 × 104	5.35 × 104	C00047	ko00300,ko00310,ko00780,ko00960,ko00970,ko01100,ko01110,ko01210,ko01230,ko02010
pme1210	150.06	61	149.051	C5H11NO2S	[M+H]+	L-Methionine*	essential amino acid	63-68-3	1.03 × 107	9.58 × 106	5.45 × 106	9.20 × 105	8.34 × 105	6.89 × 105	9.32 × 106	9.80 × 106	1.00 × 107	1.23 × 106	1.16 × 106	1.44 × 106	C00073	ko00270,ko00966,ko00970,ko01100,ko01110,ko01210,ko01230,ko01240
mws0254	156.08	110	155.069	C6H9N3O2	[M+H]+	L-Histidine*	essential amino acid	71-00-1	3.74 × 106	5.84 × 106	4.11 × 106	3.13 × 106	2.37 × 106	2.29 × 106	8.58 × 106	6.01 × 106	7.60 × 106	6.36 × 106	6.94 × 106	7.66 × 106	C00135	ko00340,ko00410,ko00970,ko01100,ko01110,ko01230,ko02010
pme0021	166.09	120.08	165.07	C9H11NO2	[M+H]+	L-Phenylalanine*	essential amino acid	63-91-2	4.50 × 106	4.55 × 106	4.83 × 106	2.49 × 106	1.78 × 106	2.10 × 106	2.51 × 106	2.42 × 106	2.53 × 106	2.06 × 106	2.01 × 106	2.00 × 106	C00079	ko00360,ko00400,ko00460,ko00940,ko00960,ko00966,ko00970,ko00998,ko01100,ko01110,ko01210,ko01230,ko02010
mws0282	203.08	116.05	204.09	C11H12N2O2	[M-H]-	L-Tryptophan*	essential amino acid	73-22-3	5.95 × 106	6.64 × 106	6.57 × 106	2.75 × 107	1.03 × 107	1.86 × 107	6.78 × 106	5.97 × 106	5.77 × 106	8.69 × 106	8.17 × 106	7.34 × 106	C00078	ko00260,ko00380,ko00400,ko00901,ko00966,ko00970,ko00998,ko01100,ko01110,ko01210,ko01230,ko01240
pme1987	88.05	71	89.048	C3H7NO2	[M-H]-	L-Alanine	Amino acids	56-41-7	1.09 × 104	1.55 × 104	6.66 × 103	1.19 × 103	2.44 × 103	2.99 × 103	7.87 × 103	7.82 × 103	1.32 × 104	2.37 × 103	4.80 × 103	3.58 × 103	C00041	ko00250,ko00270,ko00430,ko00450,ko00710,ko00970,ko00998,ko01100,ko01110,ko01200,ko01230,ko02010,ko04122
pme0010	106	60	105.043	C3H7NO3	[M+H]+	L-Serine	Amino acids	56-45-1	3.41 × 106	3.04 × 106	2.39 × 106	6.00 × 105	5.47 × 105	5.66 × 105	4.03 × 106	6.17 × 106	5.18 × 106	2.09 × 106	1.76 × 106	1.97 × 106	C00065	ko00260,ko00261,ko00270,ko00460,ko00564,ko00600,ko00630,ko00920,ko00970,ko01100,ko01110,ko01200,ko01230,ko01240,ko02010
pme0006	116.07	70.1	115.063	C5H9NO2	[M+H]+	L-Proline	Amino acids	147-85-3	2.47 × 105	2.76 × 105	1.96 × 105	1.78 × 105	1.39 × 105	1.58 × 105	1.87 × 105	2.51 × 105	2.46 × 105	3.09 × 105	5.31 × 105	5.11 × 105	C00148	ko00330,ko00332,ko00970,ko01100,ko01110,ko01230,ko02010
mws0671	120.07	74.1	119.058	C4H9NO3	[M+H]+	L-Homoserine*	Amino acids	672-15-1	1.96 × 106	1.97 × 106	1.99 × 106	1.20 × 106	1.03 × 106	9.43 × 105	2.96 × 106	3.74 × 106	3.35 × 106	2.71 × 106	2.33 × 106	2.54 × 106	C00263	ko00260,ko00270,ko00300,ko00920,ko01100,ko01110,ko01230
pme0195	120.02	62	121.02	C3H7NO2S	[M-H]-	L-Cysteine	Amino acids	52-90-4	2.60 × 103	6.21 × 103	3.59 × 103	7.22 × 103	6.28 × 103	9.33 × 103	9.32 × 103	3.11 × 103	7.35 × 103	6.59 × 103	6.67 × 103	7.67 × 103	C00097	ko00260,ko00270,ko00311,ko00332,ko00430,ko00460,ko00480,ko00730,ko00770,ko00920,ko00970,ko01100,ko01110,ko01200,ko01230,ko01240,ko04122
mws1587	132.1	86	131.095	C6H13NO2	[M+H]+	L-Norleucine	Amino acids	327-57-1	9.69 × 105	1.07 × 106	1.07 × 106	8.15 × 105	5.30 × 105	6.38 × 105	7.95 × 105	9.02 × 105	8.01 × 105	7.36 × 105	6.63 × 105	7.58 × 105	C01933	--
mws0001	133.06	74	132.054	C4H8N2O3	[M+H]+	L-Asparagine	Amino acids	70-47-3	6.90 × 106	5.68 × 106	5.57 × 106	1.21 × 107	1.07 × 107	9.49 × 106	1.54 × 107	1.29 × 107	1.38 × 107	2.93 × 107	2.57 × 107	2.74 × 107	C00152	ko00250,ko00460,ko00970,ko01100,ko01110,ko01230
pme2527	133	116	132.09	C5H12N2O2	[M+H]+	L-Ornithine	Amino acids	70-26-8	5.78 × 104	7.97 × 104	5.45 × 104	1.96 × 104	2.33 × 103	1.98 × 104	6.57 × 104	7.23 × 104	6.76 × 104	5.33 × 104	5.60 × 104	5.60 × 104	C00077	ko00220,ko00330,ko00472,ko00480,ko01100,ko01110,ko01210,ko01230,ko02010
mws0219	132.03	88	133.038	C4H7NO4	[M-H]-	L-Aspartic Acid	Amino acids	56-84-8	2.60 × 107	2.19 × 107	2.26 × 107	1.83 × 107	2.24 × 107	1.80 × 107	1.47 × 107	1.79 × 107	1.67 × 107	1.30 × 107	1.56 × 107	1.53 × 107	C00049	ko00220,ko00250,ko00260,ko00261,ko00270,ko00300,ko00340,ko00410,ko00460,ko00710,ko00760,ko00770,ko00970,ko01100,ko01110,ko01200,ko01210,ko01230,ko01240,ko02010
pme0193	147.08	84	146.069	C5H10N2O3	[M+H]+	L-Glutamine	Amino acids	56-85-9	5.15 × 104	5.93 × 104	3.54 × 103	2.85 × 104	2.48 × 104	2.86 × 104	2.76 × 104	5.23 × 104	2.61 × 104	4.59 × 104	4.60 × 104	4.66 × 104	C00064	ko00220,ko00230,ko00240,ko00250,ko00630,ko00750,ko00910,ko00970,ko01100,ko01230,ko01240,ko02010
pme0014	148.06	84	147.053	C5H9NO4	[M+H]+	L-Glutamic acid	Amino acids	56-86-0	8.25 × 107	7.90 × 107	6.29 × 107	3.42 × 107	3.41 × 107	3.27 × 107	7.41 × 107	6.89 × 107	6.93 × 107	4.86 × 107	4.89 × 107	4.40 × 107	C00025	ko00220,ko00250,ko00330,ko00332,ko00340,ko00430,ko00480,ko00524,ko00630,ko00650,ko00660,ko00860,ko00910,ko00970,ko01100,ko01110,ko01200,ko01210,ko01230,ko01240,ko02010
Lmbp000123	164.07	56.05	163.067	C6H13NO2S	[M+H]+	L-Homomethionine	Amino acids	25148-30-5	1.58 × 104	2.45 × 104	5.21 × 104	9.00 × 100	9.00 × 100	9.00 × 100	3.04 × 104	4.52 × 104	3.51 × 104	2.27 × 104	3.90 × 104	1.34 × 104	C17213	ko00966,ko01110,ko01210
MWSmce119	175.11	70.06	174.112	C6H14N4O2	[M+H]+	L-Arginine	Amino acids	74-79-3	2.36 × 107	1.86 × 107	1.76 × 107	2.11 × 107	1.75 × 107	1.43 × 107	5.19 × 107	5.44 × 107	4.72 × 107	7.48 × 107	6.70 × 107	7.43 × 107	C00062	ko00220,ko00261,ko00330,ko00472,ko00970,ko01100,ko01110,ko01230,ko02010
mws0250	182.08	136.1	181.074	C9H11NO3	[M+H]+	L-Tyrosine	Amino acids	60-18-4	4.05 × 105	3.88 × 105	3.55 × 105	3.59 × 105	3.08 × 105	2.80 × 105	2.78 × 105	2.81 × 105	2.76 × 105	3.04 × 105	2.80 × 105	3.06 × 105	C00082	ko00130,ko00261,ko00350,ko00360,ko00400,ko00460,ko00730,ko00940,ko00950,ko00965,ko00966,ko00970,ko00998,ko01100,ko01110,ko01210,ko01230,ko01240
pme2890	269.06	136	268.055	C8H16N2O4S2	[M+H]+	L-Homocystine	Amino acids	626-72-2	1.10 × 105	2.94 × 105	2.20 × 105	6.35 × 104	5.01 × 104	7.06 × 104	2.75 × 105	1.14 × 105	2.83 × 105	8.74 × 104	8.51 × 104	7.56 × 104	C01817	ko00270
ML10198895	88.04	88.04	89.048	C3H7NO2	[M-H]-	N-Methylglycine	Amino acids derivatives	107-97-1	2.93 × 104	2.79 × 104	2.25 × 104	3.02 × 103	1.53 × 104	1.64 × 104	1.95 × 104	2.31 × 104	2.08 × 104	9.10 × 103	1.41 × 104	1.51 × 104	C00213	ko00260,ko00330,ko01100
MWSmce461	102.05	56.05	101.048	C4H7NO2	[M+H]+	L-Azetidine-2-carboxylic acid	Amino acids derivatives	2133-34-8	6.50 × 105	6.26 × 105	6.55 × 105	2.89 × 105	2.52 × 105	2.60 × 105	6.74 × 105	8.52 × 105	6.95 × 105	4.08 × 105	3.25 × 105	4.03 × 105	--	--
MWSmce585	104.07	59.01	103.063	C4H9NO2	[M+H]+	Methyl 3-aminopropanoate	Amino acids derivatives	4138-35-6	4.47 × 106	4.10 × 106	4.35 × 106	2.99 × 106	2.71 × 106	2.44 × 106	6.89 × 106	6.27 × 106	6.63 × 106	5.21 × 106	4.54 × 106	5.12 × 106	--	--
pme3033	104.07	86	103.063	C4H9NO2	[M+H]+	N,N-Dimethylglycine	Amino acids derivatives	1118-68-9	3.70 × 106	3.43 × 106	2.94 × 106	4.99 × 105	3.83 × 105	5.18 × 105	3.73 × 106	3.66 × 106	4.42 × 106	1.18 × 106	9.13 × 105	1.14 × 106	C01026	ko00260,ko01100
pme3193	116.04	74	117.043	C4H7NO3	[M-H]-	N-Acetyl-L-glycine	Amino acids derivatives	543-24-8	1.83 × 104	3.27 × 104	3.35 × 104	4.88 × 104	3.73 × 104	4.33 × 104	8.28 × 103	1.92 × 104	3.79 × 104	2.26 × 104	2.72 × 104	2.14 × 104	--	--
MWS5209	235.16	118.09	117.079	C5H11NO2	[2M+H]+	N-Methyl-α-aminoisobutyric acid	Amino acids derivatives	2566-34-9	1.89 × 107	1.65 × 107	1.75 × 107	2.02 × 107	1.78 × 107	1.98 × 107	1.33 × 107	1.38 × 107	1.50 × 107	1.74 × 107	2.04 × 107	1.82 × 107	--	--
MWS0813	128.04	82.03	129.043	C5H7NO3	[M-H]-	5-Oxoproline	Amino acids derivatives	149-87-1	4.32 × 103	6.21 × 103	1.65 × 104	2.14 × 103	2.91 × 103	8.16 × 103	8.07 × 103	1.42 × 104	1.23 × 104	2.84 × 103	4.41 × 103	8.09 × 103	C02237	ko01100
mws0263	128.04	82.03	129.043	C5H7NO3	[M-H]-	5-Oxo-L-Proline	Amino acids derivatives	98-79-3	1.21 × 104	1.72 × 104	1.83 × 104	7.28 × 103	8.93 × 103	1.14 × 104	6.66 × 103	5.43 × 103	2.30 × 104	2.18 × 103	1.25 × 104	1.51 × 104	C01879	ko00480,ko01100
ML10181668	130.09	84.08	129.079	C6H11NO2	[M+H]+	Cycloleucine	Amino acids derivatives	52-52-8	1.21 × 107	1.02 × 107	7.69 × 106	4.51 × 106	2.55 × 106	3.41 × 106	1.68 × 107	1.62 × 107	1.59 × 107	8.31 × 106	1.07 × 107	1.03 × 107	C03969	--
MWS2413	130.05	58.03	131.058	C5H9NO3	[M-H]-	N-acetyl-beta-alanine	Amino acids derivatives	3025-95-4	2.87 × 105	2.31 × 105	2.32 × 105	1.54 × 105	1.56 × 105	1.82 × 105	2.53 × 105	2.11 × 105	2.34 × 105	1.43 × 105	1.28 × 105	1.61 × 105	C01073	ko00410
mws0216	132.07	86	131.058	C5H9NO3	[M+H]+	Trans-4-Hydroxy-L-proline*	Amino acids derivatives	51-35-4	6.50 × 106	1.45 × 107	1.33 × 107	7.20 × 106	4.91 × 106	7.73 × 106	1.26 × 107	6.90 × 106	1.29 × 107	7.27 × 106	8.45 × 106	7.79 × 106	C01157	ko00330,ko01100,ko02010
Zmdp000972	136.04	91.05	135.035	C4H9NO2S	[M+H]+	S-Methyl-L-cysteine	Amino acids derivatives	1187-84-4	5.91 × 105	6.87 × 105	6.92 × 105	5.02 × 105	4.24 × 105	3.81 × 105	4.41 × 105	4.09 × 105	4.16 × 105	4.35 × 105	3.58 × 105	4.38 × 105	C22040	ko02010
Hmsp000364	144.1	98.09	143.095	C7H13NO2	[M+H]+	L-Cyclopentylglycine	Amino acids derivatives	2521-84-8	7.25 × 104	8.10 × 104	5.61 × 104	1.14 × 105	8.09 × 104	9.55 × 104	7.55 × 104	8.29 × 104	5.78 × 104	8.97 × 104	9.16 × 104	8.99 × 104	--	--
Lmqp000427	146.08	82.07	145.074	C6H11NO3	[M+H]+	N-Methyl-Trans-4-Hydroxy-L-Proline	Amino acids derivatives	4252-82-8	2.56 × 105	2.84 × 105	3.36 × 105	2.56 × 105	3.04 × 105	3.26 × 105	5.20 × 105	5.88 × 105	4.83 × 105	4.55 × 105	5.47 × 105	5.27 × 105	--	--
Zmzn000113	146.05	102.06	147.053	C5H9NO4	[M-H]-	L-threo-3-Methylaspartate	Amino acids derivatives	6061-13-8	4.22 × 106	4.07 × 106	3.55 × 106	2.71 × 106	3.05 × 106	2.72 × 106	3.68 × 106	5.01 × 106	4.55 × 106	2.62 × 106	3.01 × 106	2.59 × 106	C03618	ko00630,ko00660,ko01100,ko01200
mws1050	148.06	88	147.053	C5H9NO4	[M+H]+	O-Acetylserine	Amino acids derivatives	5147-00-2	2.05 × 105	2.61 × 105	2.57 × 105	2.02 × 105	1.74 × 105	1.58 × 105	1.94 × 105	2.98 × 105	2.32 × 105	2.02 × 105	1.55 × 105	1.31 × 105	C00979	ko00270,ko00908,ko00920,ko01100,ko01110,ko01200,ko01230,ko04122
MWSmce190	148.09	74.02	147.09	C6H13NO3	[M+H]+	(2S,3R,4S)-4-Hydroxyisoleucine	Amino acids derivatives	55399-93-4	2.35 × 105	2.16 × 105	2.26 × 105	1.66 × 105	1.15 × 105	1.01 × 105	2.51 × 105	2.66 × 105	2.18 × 105	1.68 × 105	1.39 × 105	1.84 × 105	--	--
MWSmce608	148.1	74.02	147.09	C6H13NO3	[M+H]+	4-Hydoxy-L-Isoleucine	Amino acids derivatives	781658-23-9	2.04 × 105	2.28 × 105	2.29 × 105	1.53 × 105	1.34 × 105	1.11 × 105	2.68 × 105	2.45 × 105	2.40 × 105	1.56 × 105	1.67 × 105	1.58 × 105	--	--
pme3382	160.06	98	161.069	C6H11NO4	[M-H]-	N-Acetyl-L-threonine	Amino acids derivatives	17093-74-2	1.04 × 105	9.19 × 104	6.18 × 104	6.78 × 104	8.31 × 104	9.18 × 104	9.36 × 104	7.88 × 104	1.07 × 105	7.70 × 104	1.15 × 105	7.76 × 104	--	--
MWS3035	160.06	116.05	161.069	C6H11NO4	[M-H]-	N-Methyl-L-Glutamate	Amino acids derivatives	35989-16-3	3.77 × 103	3.20 × 103	4.41 × 103	5.57 × 103	1.57 × 103	6.31 × 102	3.77 × 103	4.38 × 103	2.20 × 103	6.91 × 103	7.57 × 103	1.23 × 103	C01046	ko01100
pme2914	161.05	99	162.053	C6H10O5	[M-H]-	3-Hydroxy-3-methylpentane-1,5-dioic acid	Amino acids derivatives	503-49-1	3.68 × 105	3.79 × 105	4.61 × 105	7.25 × 105	7.36 × 105	7.98 × 105	2.89 × 105	3.00 × 105	3.64 × 105	5.92 × 105	7.26 × 105	5.67 × 105	C03761	--
pme2758	162.04	144	163.048	C5H9NO5	[M-H]-	4-Hydroxy-L-glutamic acid	Amino acids derivatives	3913-68-6	3.85 × 104	3.47 × 104	3.32 × 104	4.51 × 104	6.06 × 104	3.73 × 104	4.42 × 104	3.51 × 104	5.30 × 104	2.26 × 104	5.09 × 104	3.70 × 104	C03079	--
pme1419	164.07	104	163.067	C6H13NO2S	[M+H]+	L-Methionine methyl ester	Amino acids derivatives	10332-17-9	3.58 × 104	4.09 × 104	3.32 × 104	9.00 × 100	9.00 × 100	9.00 × 100	4.52 × 104	5.73 × 104	4.59 × 104	9.00 × 100	1.13 × 104	8.05 × 103	--	--
pme2617	166.05	102	165.046	C5H11NO3S	[M+H]+	L-Methionine Sulfoxide	Amino acids derivatives	3226-65-1	1.82 × 106	1.93 × 106	1.98 × 106	1.60 × 106	1.43 × 106	1.31 × 106	1.53 × 106	1.44 × 106	1.50 × 106	1.52 × 106	1.71 × 106	1.60 × 106	C02989	ko00270
pme0124	173.09	115.5	172.085	C7H12N2O3	[M+H]+	L-Glycyl-L-proline	Amino acids derivatives	704-15-4	3.95 × 104	5.24 × 104	7.05 × 104	1.86 × 104	2.73 × 104	2.33 × 104	2.30 × 104	2.79 × 104	2.47 × 104	3.04 × 104	3.53 × 104	4.50 × 104	--	--
pme0253	174.11	86	173.105	C8H15NO3	[M+H]+	N-Acetyl-L-leucine	Amino acids derivatives	1188-21-2	2.27 × 104	2.99 × 104	5.42 × 103	2.35 × 104	1.92 × 104	2.46 × 104	1.60 × 104	1.79 × 104	1.35 × 104	1.74 × 104	2.17 × 104	1.89 × 104	C02710	--
MWS4471	173.06	58.03	174.064	C6H10N2O4	[M-H]-	N-Alpha-Acetyl-L-Asparagine	Amino acids derivatives	4033-40-3	1.06 × 104	9.00 × 100	1.51 × 104	1.69 × 104	9.00 × 100	1.42 × 104	4.04 × 104	2.38 × 104	3.57 × 104	3.96 × 104	4.85 × 104	4.66 × 104	--	--
Zmyn000155	173.11	131.08	174.1	C7H14N2O3	[M-H]-	N-α-Acetyl-L-ornithine	Amino acids derivatives	6205-08-9	8.54 × 105	6.57 × 105	5.57 × 105	6.95 × 105	6.88 × 105	6.81 × 105	1.97 × 106	1.82 × 106	1.70 × 106	2.64 × 106	2.60 × 106	2.90 × 106	C00437	ko00220,ko01100,ko01110,ko01210,ko01230
pme2559	174.04	88	175.048	C6H9NO5	[M-H]-	N-Acetyl-L-Aspartic Acid	Amino acids derivatives	997-55-7	2.08 × 105	1.92 × 105	1.63 × 105	2.07 × 105	1.46 × 105	2.05 × 105	2.99 × 105	2.84 × 105	2.93 × 105	3.38 × 105	3.59 × 105	3.29 × 105	C01042	ko00250,ko01100
pme2602	184	97	185.009	C3H8NO6P	[M-H]-	O-Phospho-L-serine	Amino acids derivatives	407-41-0	7.85 × 103	4.93 × 103	1.84 × 104	9.00 × 100	9.00 × 100	9.00 × 100	1.65 × 104	1.86 × 104	9.00 × 100	6.33 × 103	6.42 × 103	6.31 × 103	C01005	ko00260,ko00270,ko00970,ko01100,ko01110,ko01200,ko01230
pme0137	187.07	125	188.08	C7H12N2O4	[M-H]-	N-Acetyl-L-Glutamine	Amino acids derivatives	2490-97-3	1.28 × 105	1.37 × 105	2.09 × 105	2.53 × 105	1.75 × 105	1.08 × 105	1.16 × 105	1.99 × 105	1.66 × 105	1.17 × 105	2.03 × 105	1.79 × 105	--	--
mws0736	189.12	86	188.116	C8H16N2O3	[M+H]+	N-Glycyl-L-leucine*	Amino acids derivatives	869-19-2	1.04 × 106	1.29 × 106	1.42 × 106	4.58 × 105	4.36 × 105	5.13 × 105	5.79 × 105	5.69 × 105	6.67 × 105	6.90 × 105	6.65 × 105	6.20 × 105	C02155	--
mws5041	189.12	86.1	188.116	C8H16N2O3	[M+H]+	L-Glycyl-L-isoleucine*	Amino acids derivatives	19461-38-2	9.44 × 105	1.18 × 106	1.30 × 106	4.78 × 105	4.47 × 105	4.57 × 105	5.58 × 105	4.69 × 105	6.41 × 105	6.51 × 105	6.41 × 105	6.37 × 105	--	--
pme0122	189.12	126	188.116	C8H16N2O3	[M+H]+	N6-Acetyl-L-lysine	Amino acids derivatives	692-04-6	8.10 × 104	8.03 × 104	9.60 × 104	6.36 × 104	8.81 × 104	4.83 × 104	2.99 × 104	3.24 × 104	4.92 × 104	6.04 × 104	6.91 × 104	4.45 × 104	C02727	ko00310,ko01100
pme3388	189.13	144	188.127	C7H16N4O2	[M+H]+	Homoarginine	Amino acids derivatives	156-86-5	4.02 × 104	4.17 × 104	4.53 × 104	5.30 × 104	5.29 × 104	4.49 × 104	1.04 × 105	1.24 × 105	1.20 × 105	1.89 × 105	2.15 × 105	2.45 × 105	C01924	--
Zmjp000182	189.13	70.07	188.127	C7H16N4O2	[M+H]+	N-Monomethyl-L-arginine	Amino acids derivatives	17035-90-4	5.18 × 105	5.71 × 105	5.36 × 105	3.85 × 105	3.23 × 105	4.64 × 105	1.15 × 106	1.04 × 106	1.18 × 106	1.64 × 106	1.12 × 106	1.20 × 106	C03884	--
Zmzp000145	189.16	84.08	188.152	C9H20N2O2	[M+H]+	Trimethyllysine	Amino acids derivatives	23284-33-5	6.99 × 105	7.27 × 105	9.67 × 105	6.02 × 105	7.58 × 105	8.86 × 105	2.16 × 106	1.42 × 106	2.10 × 106	9.18 × 105	7.85 × 105	8.44 × 105	C03793	ko00310,ko01100
pme0075	188.06	128	189.064	C7H11NO5	[M-H]-	N-Acetyl-L-glutamic acid	Amino acids derivatives	1188-37-0	2.99 × 105	2.45 × 105	2.53 × 105	1.70 × 105	2.05 × 105	1.36 × 105	2.78 × 105	1.36 × 105	2.31 × 105	9.83 × 104	1.29 × 105	1.34 × 105	C00624	ko00220,ko01100,ko01110,ko01210,ko01230
MWSslk140	192.07	56.05	191.062	C7H13NO3S	[M+H]+	N-Acetyl-L-Methionine	Amino acids derivatives	65-82-7	1.45 × 105	1.53 × 105	1.40 × 105	2.22 × 104	1.49 × 104	2.77 × 104	8.52 × 104	5.53 × 104	7.60 × 104	2.94 × 104	3.20 × 104	3.55 × 104	C02712	--
MWS1771	196.1	91.05	195.09	C10H13NO3	[M+H]+	L-Tyrosine methyl ester	Amino acids derivatives	1080-06-4	6.81 × 104	7.26 × 104	7.65 × 104	9.51 × 104	7.65 × 104	9.87 × 104	1.04 × 105	1.20 × 105	1.01 × 105	1.51 × 105	1.29 × 105	1.01 × 105	C03404	--
pme3827	198.08	152.2	197.069	C9H11NO4	[M+H]+	3,4-Dihydroxy-L-phenylalanine (L-Dopa)	Amino acids derivatives	59-92-7	2.00 × 105	3.99 × 105	4.42 × 105	8.50 × 103	1.81 × 104	1.38 × 104	4.48 × 104	1.05 × 105	8.12 × 104	7.32 × 104	8.77 × 104	7.80 × 104	C00355	ko00350,ko00950,ko00965,ko01100,ko01110
NK10251888	203.15	70.07	202.143	C8H18N4O2	[M+H]+	NG,NG-Dimethyl-L-arginine	Amino acids derivatives	30315-93-6	5.07 × 105	6.53 × 105	5.07 × 105	2.54 × 105	3.08 × 105	3.95 × 105	6.45 × 105	6.08 × 105	5.22 × 105	8.94 × 105	8.55 × 105	9.15 × 105	C03626	--
Zmgn002106	206.08	58.03	207.09	C11H13NO3	[M-H]-	N-Acetyl-L-phenylalanine	Amino acids derivatives	2018-61-3	2.26 × 104	4.77 × 104	4.49 × 104	2.93 × 104	3.66 × 104	4.21 × 104	2.25 × 104	1.64 × 104	2.82 × 104	2.07 × 104	2.22 × 104	1.52 × 104	C03519	ko00360,ko01100
pmb2673	210.04	135.1	211.048	C9H9NO5	[M-H]-	6-Hydroxydopaquinone	Amino acids derivatives	135791-48-9	2.09 × 104	1.56 × 104	1.83 × 104	1.40 × 104	6.42 × 103	1.53 × 104	2.27 × 104	1.07 × 104	8.65 × 103	8.27 × 103	8.25 × 103	1.62 × 104	--	--
pme0170	217.13	158	216.122	C8H16N4O3	[M+H]+	N-Acetyl-L-Arginine	Amino acids derivatives	155-84-0	3.13 × 104	2.59 × 104	1.42 × 104	1.87 × 104	2.47 × 104	2.65 × 104	3.06 × 104	2.79 × 104	3.08 × 104	2.73 × 104	2.39 × 104	2.15 × 104	--	--
pme2566	217.08	199	218.09	C8H14N2O5	[M-H]-	5-L-Glutamyl-L-amino acid	Amino acids derivatives	5875-41-2	9.86 × 104	5.18 × 104	6.80 × 104	6.28 × 104	7.50 × 104	8.03 × 104	1.93 × 105	2.62 × 105	3.29 × 105	1.58 × 105	1.69 × 105	1.38 × 105	--	--
pme1228	221.09	204	220.085	C11H12N2O3	[M+H]+	5-Hydroxy-L-tryptophan	Amino acids derivatives	56-69-9	7.06 × 103	1.45 × 104	1.16 × 104	3.10 × 104	1.75 × 104	2.94 × 104	2.28 × 104	1.39 × 104	1.99 × 104	2.96 × 104	3.43 × 104	3.43 × 104	C00643	ko00380,ko01100
MWS4296	223.11	120.08	222.1	C11H14N2O3	[M+H]+	Glycylphenylalanine	Amino acids derivatives	3321-03-7	8.98 × 105	1.01 × 106	1.05 × 106	3.15 × 105	2.58 × 105	3.25 × 105	4.33 × 105	4.23 × 105	5.03 × 105	4.21 × 105	4.76 × 105	4.56 × 105	--	--
mws5042	223.11	120.09	222.1	C11H14N2O3	[M+H]+	L-Glycyl-L-phenylalanine	Amino acids derivatives	721-66-4	9.32 × 105	1.12 × 106	1.02 × 106	2.75 × 105	2.56 × 105	3.00 × 105	3.94 × 105	4.17 × 105	5.47 × 105	4.22 × 105	3.61 × 105	3.89 × 105	--	--
mws0520	224.09	136	223.084	C11H13NO4	[M+H]+	N-Acetyl-L-tyrosine	Amino acids derivatives	537-55-3	4.67 × 103	9.00 × 100	1.24 × 104	9.00 × 100	5.58 × 103	1.02 × 104	9.04 × 103	1.10 × 104	5.07 × 103	6.28 × 103	6.14 × 103	3.80 × 103	--	--
Lmhp001461	229.15	70.07	228.147	C11H20N2O3	[M+H]+	L-Prolyl-L-Leucine	Amino acids derivatives	52899-07-7	1.05 × 106	1.45 × 106	1.78 × 106	3.38 × 105	3.66 × 105	3.82 × 105	9.21 × 105	6.94 × 105	7.98 × 105	4.60 × 105	4.29 × 105	5.09 × 105	--	--
Lmhp001670	231.16	72.08	230.163	C11H22N2O3	[M+H]+	L-Valyl-L-Leucine	Amino acids derivatives	3989-97-7	1.66 × 106	2.14 × 106	2.12 × 106	3.12 × 105	3.05 × 105	3.35 × 105	5.80 × 105	6.23 × 105	6.76 × 105	4.64 × 105	4.37 × 105	5.05 × 105	--	--
pmb0962	235.1	118.3	234.158	C10H22N2O4	[M+H]+	L-Lysine-Butanoic Acid	Amino acids derivatives	80407-71-2	2.37 × 107	2.27 × 107	2.00 × 107	2.49 × 107	2.38 × 107	2.02 × 107	1.47 × 107	1.47 × 107	1.53 × 107	1.86 × 107	2.28 × 107	1.90 × 107	--	--
mws4176	237.12	120.09	236.116	C12H16N2O3	[M+H]+	L-Alanyl-L-Phenylalanine	Amino acids derivatives	3061-90-3	3.73 × 105	4.75 × 105	4.54 × 105	6.06 × 104	5.09 × 104	5.31 × 104	1.83 × 105	1.45 × 105	1.57 × 105	7.74 × 104	7.43 × 104	8.70 × 104	--	--
Lmhp002031	245.18	86.1	244.179	C12H24N2O3	[M+H]+	L-Leucyl-L-Leucine	Amino acids derivatives	3303-31-9	1.18 × 106	1.85 × 106	1.53 × 106	3.54 × 104	1.60 × 104	3.69 × 104	3.97 × 105	4.21 × 105	5.83 × 105	7.23 × 104	2.98 × 104	7.22 × 104	--	--
pmb2591	245.09	203.2	246.1	C13H14N2O3	[M-H]-	N-Acetyl-L-Tryptophan	Amino acids derivatives	1218-34-4	7.62 × 104	9.27 × 104	9.94 × 104	6.74 × 104	5.94 × 104	8.09 × 104	4.95 × 104	4.56 × 104	4.43 × 104	1.86 × 104	3.24 × 104	3.86 × 104	--	--
Lmrj002087	247.13	86.09	246.121	C10H18N2O5	[M+H]+	L-Isoleucyl-L-Aspartate	Amino acids derivatives	-	3.76 × 105	4.89 × 105	5.29 × 105	5.86 × 104	4.04 × 104	2.48 × 104	9.72 × 104	9.44 × 104	1.38 × 105	2.86 × 104	5.80 × 104	3.65 × 104	--	--
Zmdp001647	247.13	184.1	246.122	C10H18N2O5	[M+H]+	γ-Glutamyl-L-valine	Amino acids derivatives	-	8.32 × 104	8.48 × 104	7.50 × 104	7.04 × 104	5.32 × 104	5.54 × 104	7.94 × 104	6.49 × 104	6.83 × 104	7.66 × 104	9.16 × 104	1.02 × 105	--	--
Zmdp002216	261.14	86.1	260.137	C11H20N2O5	[M+H]+	L-γ-Glutamyl-L-leucine	Amino acids derivatives	2566-39-4	9.40 × 104	9.04 × 104	9.87 × 104	1.88 × 105	9.75 × 104	1.63 × 105	1.64 × 105	1.45 × 105	1.14 × 105	1.98 × 105	1.69 × 105	2.10 × 105	--	--
MWS4309	262.12	188.07	261.111	C13H15N3O3	[M+H]+	Glycyl-tryptophan	Amino acids derivatives	2390-74-1	2.37 × 105	2.92 × 105	2.84 × 105	1.22 × 105	1.12 × 105	9.91 × 104	1.46 × 105	1.37 × 105	1.59 × 105	1.73 × 105	1.58 × 105	1.81 × 105	--	--
Lmhp001732	263.13	70.07	262.132	C14H18N2O3	[M+H]+	L-Prolyl-L-Phenylalanine	Amino acids derivatives	13589-02-1	3.67 × 104	6.71 × 104	7.19 × 104	1.97 × 104	2.17 × 104	3.55 × 104	4.18 × 104	2.20 × 104	5.03 × 104	7.16 × 104	3.96 × 104	5.89 × 104	--	--
mws0715	263.1	145	264.111	C13H16N2O4	[M-H]-	Phenylacetyl-L-glutamine	Amino acids derivatives	28047-15-6	8.13 × 103	6.84 × 103	5.68 × 103	1.33 × 104	6.61 × 103	1.14 × 104	8.66 × 103	8.42 × 103	5.10 × 103	7.69 × 103	9.00 × 100	9.12 × 103	C04148	ko00360
Lmhp002001	265.15	72.08	264.147	C14H20N2O3	[M+H]+	L-Valyl-L-Phenylalanine	Amino acids derivatives	3918-92-1	8.88 × 105	1.14 × 106	1.12 × 106	1.41 × 105	1.30 × 105	1.72 × 105	3.47 × 105	3.04 × 105	4.00 × 105	2.16 × 105	1.78 × 105	2.17 × 105	--	--
Zmdp001663	279.1	133.03	278.094	C10H18N2O5S	[M+H]+	γ-glutamylmethionine	Amino acids derivatives	17663-87-5	1.30 × 105	1.25 × 105	9.77 × 104	1.32 × 104	2.05 × 104	1.96 × 104	2.23 × 105	1.41 × 105	1.75 × 105	4.55 × 104	4.54 × 104	4.62 × 104	--	--
mws0629	281.11	166	280.106	C13H16N2O5	[M+H]+	L-Aspartyl-L-Phenylalanine	Amino acids derivatives	13433-09-5	1.67 × 105	1.91 × 105	2.20 × 105	4.37 × 104	5.56 × 104	4.46 × 104	4.92 × 104	6.20 × 104	7.75 × 104	3.79 × 104	3.90 × 104	4.26 × 104	--	--
Zmdn001564	293.11	164.07	294.122	C14H18N2O5	[M-H]-	γ-Glutamylphenylalanine	Amino acids derivatives	7432-24-8	2.83 × 104	4.10 × 104	4.29 × 104	4.06 × 104	2.79 × 104	2.15 × 104	6.37 × 104	3.32 × 104	3.12 × 104	3.77 × 104	4.46 × 104	4.39 × 104	--	--
pme1086	306.08	143	307.084	C10H17N3O6S	[M-H]-	Glutathione reduced form	Amino acids derivatives	70-18-8	4.21 × 104	4.47 × 104	4.12 × 104	1.16 × 106	1.44 × 106	1.29 × 106	5.82 × 105	4.29 × 105	3.29 × 105	1.24 × 106	2.63 × 106	1.88 × 106	C00051	ko00270,ko00480,ko01100,ko01240,ko02010
Zmdp001857	311.12	165.05	310.116	C14H18N2O6	[M+H]+	γ-Glutamyltyrosine	Amino acids derivatives	7432-23-7	6.75 × 104	5.67 × 104	7.53 × 104	6.42 × 104	5.19 × 104	5.47 × 104	9.08 × 104	6.94 × 104	6.80 × 104	6.98 × 104	8.34 × 104	8.45 × 104	--	--
mws0636	313.15	166	312.147	C18H20N2O3	[M+H]+	L-Phenylalanyl-L-phenylalanine	Amino acids derivatives	2577-40-4	6.54 × 104	4.34 × 104	4.50 × 104	2.04 × 103	8.84 × 103	8.79 × 103	3.24 × 104	2.55 × 104	2.41 × 104	1.03 × 104	7.54 × 103	6.46 × 103	--	--
mws0582	322.11	130	321.099	C11H19N3O6S	[M+H]+	S-(Methyl)glutathione	Amino acids derivatives	2922-56-7	1.45 × 105	1.09 × 105	1.39 × 105	1.35 × 105	1.20 × 105	1.00 × 105	1.84 × 105	1.96 × 105	2.10 × 105	2.90 × 105	2.80 × 105	2.32 × 105	C11347	--
MWS2426	332.13	203.08	333.132	C16H19N3O5	[M-H]-	Tryptophan glutamic acid	Amino acids derivatives	36099-95-3	1.00 × 104	1.42 × 104	9.51 × 103	6.72 × 103	4.23 × 103	5.69 × 103	6.50 × 103	2.74 × 103	4.93 × 103	5.27 × 103	1.62 × 103	5.04 × 103	--	--
pme1286	385.13	250	384.122	C14H20N6O5S	[M+H]+	S-(5'-Adenosy)-L-homocysteine	Amino acids derivatives	979-92-0	3.79 × 105	3.17 × 105	3.14 × 105	4.08 × 105	9.00 × 100	6.05 × 105	1.16 × 106	6.08 × 105	6.41 × 105	4.81 × 105	5.15 × 105	4.96 × 105	C00021	ko00270,ko01100,ko01230,ko01240
mws4134	611.14	306.08	612.152	C20H32N6O12S2	[M-H]-	Oxiglutatione	Amino acids derivatives	27025-41-8	5.57 × 105	4.25 × 105	4.55 × 105	6.13 × 105	6.11 × 105	7.07 × 105	6.48 × 105	6.97 × 105	7.08 × 105	5.88 × 105	6.72 × 105	6.38 × 105	C00127	ko00480,ko01100,ko01240
pme0128	159.08	88	160.085	C6H12N2O3	[M-H]-	L-Alanyl-L-Alanine	oligopeptides	1948-31-8	4.43 × 104	3.25 × 104	2.59 × 104	3.51 × 104	4.22 × 104	3.43 × 104	7.69 × 104	7.75 × 104	6.84 × 104	8.40 × 104	6.00 × 104	6.03 × 104	--	--
MWStz091	169.1	70.07	168.09	C8H12N2O2	[M+H]+	Cyclo(L-Ala-L-Pro)	oligopeptides	36357-32-1	7.21 × 103	6.36 × 103	9.49 × 103	5.58 × 103	3.39 × 103	4.34 × 103	4.45 × 103	4.69 × 103	4.93 × 103	8.66 × 103	6.80 × 103	7.09 × 103	--	--
MWStz261	211.14	70.07	210.137	C11H18N2O2	[M+H]+	Cyclo(D-Leu-L-Pro)	oligopeptides	36238-67-2	4.23 × 103	3.55 × 103	5.63 × 103	9.00 × 100	9.00 × 100	9.18 × 103	2.82 × 103	8.39 × 103	6.03 × 103	4.61 × 103	2.81 × 103	9.00 × 100	--	--
MWStz205	245.13	120.08	244.121	C14H16N2O2	[M+H]+	Cyclo(D-Phe-L-Pro)	oligopeptides	26488-24-4	5.28 × 103	5.30 × 103	6.03 × 103	9.00 × 100	9.00 × 100	9.00 × 100	1.32 × 103	5.37 × 103	4.62 × 103	3.99 × 103	6.65 × 102	4.66 × 103	--	--
MWStz255	245.13	120.08	244.121	C14H16N2O2	[M+H]+	Cyclo(Pro-Phe)	oligopeptides	3705-26-8	3.97 × 103	2.65 × 103	4.68 × 103	1.32 × 103	1.28 × 103	2.65 × 103	2.65 × 103	1.33 × 103	3.31 × 103	7.95 × 103	3.31 × 103	3.33 × 103	C11847	--
pme2563	249.06	128	250.062	C8H14N2O5S	[M-H]-	γ-Glu-Cys	oligopeptides	636-58-8	8.43 × 103	1.04 × 104	9.88 × 103	4.61 × 104	6.22 × 104	3.72 × 104	6.45 × 104	4.16 × 104	3.10 × 104	5.17 × 104	6.59 × 104	8.08 × 104	C00669	ko00480,ko01100,ko01240
