# Supplementary material for: Integrated Metabolome and Transcriptome Analyses Reveal Amino Acid Biosynthesis Mechanisms during the Physiological Maturity of Grains in Yunnan Hulled Wheat (Triticum aestivum ssp. yunnanense King)
Source: Int J Mol Sci. 2023 Aug 30;24(17):13475. doi: 10.3390/ijms241713475 (PMC10487551; doi:10.3390/ijms241713475)
Supplement: Supplementary file 1 [file ijms-24-13475-s001.zip › Table S6.xlsx]

## Sheet: Table S6
Table S6.Tryptophan and its important derivatives relative content among DWG,DMG,YWG and DMG.
Compounds	DWG	DMG	YWG	YMG
L-Tryptophan	6.38 × 106	1.88 × 107	6.17 × 106	8.07 × 106
5-Hydroxy-L-tryptophan	1.11 × 104	2.60 × 104	1.89 × 104	3.27 × 104
Tryptamine	3.01 × 105	1.84 × 106	4.75 × 105	5.58 × 105
N-Feruloyltryptamine	6.21 × 104	3.59 × 104	2.43 × 104	2.98 × 104
N-Hydroxytryptamine	3.47 × 106	3.44 × 105	4.37 × 105	3.60 × 105
Serotonin	3.82 × 106	3.89 × 105	6.46 × 105	3.77 × 105
N-Feruloylserotonin	1.60 × 105	3.66 × 104	8.99 × 104	2.41 × 104
