# Supplementary material for: Integrated Metabolome and Transcriptome Analyses Reveal Amino Acid Biosynthesis Mechanisms during the Physiological Maturity of Grains in Yunnan Hulled Wheat (Triticum aestivum ssp. yunnanense King)
Source: Int J Mol Sci. 2023 Aug 30;24(17):13475. doi: 10.3390/ijms241713475 (PMC10487551; doi:10.3390/ijms241713475)
Supplement: Supplementary file 1 [file ijms-24-13475-s001.zip › Table S7.xlsx]

## Sheet: Table S7
Table S7. Differential accumulation of amino acids and derivatives components in different comparative groups of Yunnan hulled wheat.
Index	Formula	Compounds	Class	CAS	DWG_vs_DMG	YWG_vs_YMG	DWG_vs_YWG	DMG_vs_YMG	DWG-1	DWG-2	DWG-3	DMG-1	DMG-2	DMG-3	YWG-1	YWG-2	YWG-3	YMG-1	YMG-2	YMG-3	cpd_ID	kegg_map
pme1987	C3H7NO2	L-Alanine	Amino acids and derivatives	56-41-7	down	down	FALSE	FALSE	1.09 × 104	1.55 × 104	6.66 × 103	1.19 × 103	2.44 × 103	2.99 × 103	7.87 × 103	7.82 × 103	1.32 × 104	2.37 × 103	4.80 × 103	3.58 × 103	C00041	ko00250,ko00270,ko00430,ko00450,ko00710,ko00970,ko00998,ko01100,ko01110,ko01200,ko01230,ko02010,ko04122
MWSmce461	C4H7NO2	L-Azetidine-2-carboxylic acid	Amino acids and derivatives	2133-34-8	down	FALSE	FALSE	FALSE	6.50 × 105	6.26 × 105	6.55 × 105	2.89 × 105	2.52 × 105	2.60 × 105	6.74 × 105	8.52 × 105	6.95 × 105	4.08 × 105	3.25 × 105	4.03 × 105	--	--
pme3033	C4H9NO2	N,N-Dimethylglycine	Amino acids and derivatives	1118-68-9	down	down	FALSE	up	3.70 × 106	3.43 × 106	2.94 × 106	4.99 × 105	3.83 × 105	5.18 × 105	3.73 × 106	3.66 × 106	4.42 × 106	1.18 × 106	9.13 × 105	1.14 × 106	C01026	ko00260,ko01100
pme0010	C3H7NO3	L-Serine	Amino acids and derivatives	56-45-1	down	down	FALSE	up	3.41 × 106	3.04 × 106	2.39 × 106	6.00 × 105	5.47 × 105	5.66 × 105	4.03 × 106	6.17 × 106	5.18 × 106	2.09 × 106	1.76 × 106	1.97 × 106	C00065	ko00260,ko00261,ko00270,ko00460,ko00564,ko00600,ko00630,ko00920,ko00970,ko01100,ko01110,ko01200,ko01230,ko01240,ko02010
pme0006	C5H9NO2	L-Proline	Amino acids and derivatives	147-85-3	FALSE	FALSE	FALSE	up	2.47 × 105	2.76 × 105	1.96 × 105	1.78 × 105	1.39 × 105	1.58 × 105	1.87 × 105	2.51 × 105	2.46 × 105	3.09 × 105	5.31 × 105	5.11 × 105	C00148	ko00330,ko00332,ko00970,ko01100,ko01110,ko01230,ko02010
mws0256	C5H11NO2	L-Valine	Amino acids and derivatives	72-18-4	down	FALSE	FALSE	FALSE	2.55 × 106	2.77 × 106	2.40 × 106	1.50 × 106	9.76 × 105	1.23 × 106	1.92 × 106	1.91 × 106	1.96 × 106	1.62 × 106	1.69 × 106	1.76 × 106	C00183	ko00280,ko00290,ko00311,ko00460,ko00770,ko00966,ko00970,ko01100,ko01110,ko01210,ko01230,ko01240,ko02010
mws0230	C4H9NO3	L-Threonine	Amino acids and derivatives	72-19-5	FALSE	FALSE	FALSE	up	1.75 × 106	1.84 × 106	1.62 × 106	1.18 × 106	8.56 × 105	8.94 × 105	2.55 × 106	3.19 × 106	3.17 × 106	2.16 × 106	2.06 × 106	2.25 × 106	C00188	ko00260,ko00261,ko00290,ko00860,ko00970,ko01100,ko01110,ko01230,ko02010
mws0671	C4H9NO3	L-Homoserine	Amino acids and derivatives	672-15-1	FALSE	FALSE	FALSE	up	1.96 × 106	1.97 × 106	1.99 × 106	1.20 × 106	1.03 × 106	9.43 × 105	2.96 × 106	3.74 × 106	3.35 × 106	2.71 × 106	2.33 × 106	2.54 × 106	C00263	ko00260,ko00270,ko00300,ko00920,ko01100,ko01110,ko01230
MWS0813	C5H7NO3	5-Oxoproline	Amino acids and derivatives	149-87-1	FALSE	down	FALSE	FALSE	4.32 × 103	6.21 × 103	1.65 × 104	2.14 × 103	2.91 × 103	8.16 × 103	8.07 × 103	1.42 × 104	1.23 × 104	2.84 × 103	4.41 × 103	8.09 × 103	C02237	ko01100
ML10181668	C6H11NO2	Cycloleucine	Amino acids and derivatives	52-52-8	down	FALSE	FALSE	up	1.21 × 107	1.02 × 107	7.69 × 106	4.51 × 106	2.55 × 106	3.41 × 106	1.68 × 107	1.62 × 107	1.59 × 107	8.31 × 106	1.07 × 107	1.03 × 107	C03969	--
mws0001	C4H8N2O3	L-Asparagine	Amino acids and derivatives	70-47-3	FALSE	FALSE	up	up	6.90 × 106	5.68 × 106	5.57 × 106	1.21 × 107	1.07 × 107	9.49 × 106	1.54 × 107	1.29 × 107	1.38 × 107	2.93 × 107	2.57 × 107	2.74 × 107	C00152	ko00250,ko00460,ko00970,ko01100,ko01110,ko01230
pme2527	C5H12N2O2	L-Ornithine	Amino acids and derivatives	70-26-8	down	FALSE	FALSE	up	5.78 × 104	7.97 × 104	5.45 × 104	1.96 × 104	2.33 × 103	1.98 × 104	6.57 × 104	7.23 × 104	6.76 × 104	5.33 × 104	5.60 × 104	5.60 × 104	C00077	ko00220,ko00330,ko00472,ko00480,ko01100,ko01110,ko01210,ko01230,ko02010
pme0026	C6H14N2O2	L-Lysine	Amino acids and derivatives	56-87-1	down	FALSE	FALSE	up	5.56 × 104	6.94 × 104	6.01 × 104	1.79 × 104	1.58 × 104	1.56 × 104	5.40 × 104	6.19 × 104	5.89 × 104	5.09 × 104	4.64 × 104	5.35 × 104	C00047	ko00300,ko00310,ko00780,ko00960,ko00970,ko01100,ko01110,ko01210,ko01230,ko02010
pme0014	C5H9NO4	L-Glutamic acid	Amino acids and derivatives	56-86-0	down	FALSE	FALSE	FALSE	8.25 × 107	7.90 × 107	6.29 × 107	3.42 × 107	3.41 × 107	3.27 × 107	7.41 × 107	6.89 × 107	6.93 × 107	4.86 × 107	4.89 × 107	4.40 × 107	C00025	ko00220,ko00250,ko00330,ko00332,ko00340,ko00430,ko00480,ko00524,ko00630,ko00650,ko00660,ko00860,ko00910,ko00970,ko01100,ko01110,ko01200,ko01210,ko01230,ko01240,ko02010
pme1210	C5H11NO2S	L-Methionine	Amino acids and derivatives	63-68-3	down	down	FALSE	FALSE	1.03 × 107	9.58 × 106	5.45 × 106	9.20 × 105	8.34 × 105	6.89 × 105	9.32 × 106	9.80 × 106	1.00 × 107	1.23 × 106	1.16 × 106	1.44 × 106	C00073	ko00270,ko00966,ko00970,ko01100,ko01110,ko01210,ko01230,ko01240
mws0254	C6H9N3O2	L-Histidine	Amino acids and derivatives	71-00-1	FALSE	FALSE	FALSE	up	3.74 × 106	5.84 × 106	4.11 × 106	3.13 × 106	2.37 × 106	2.29 × 106	8.58 × 106	6.01 × 106	7.60 × 106	6.36 × 106	6.94 × 106	7.66 × 106	C00135	ko00340,ko00410,ko00970,ko01100,ko01110,ko01230,ko02010
pme0128	C6H12N2O3	L-Alanyl-L-Alanine	Amino acids and derivatives	1948-31-8	FALSE	FALSE	up	FALSE	4.43 × 104	3.25 × 104	2.59 × 104	3.51 × 104	4.22 × 104	3.43 × 104	7.69 × 104	7.75 × 104	6.84 × 104	8.40 × 104	6.00 × 104	6.03 × 104	--	--
Lmbp000123	C6H13NO2S	L-Homomethionine	Amino acids and derivatives	25148-30-5	down	FALSE	FALSE	up	1.58 × 104	2.45 × 104	5.21 × 104	9.00 × 102	9.00 × 102	9.00 × 102	3.04 × 104	4.52 × 104	3.51 × 104	2.27 × 104	3.90 × 104	1.34 × 104	C17213	ko00966,ko01110,ko01210
pme1419	C6H13NO2S	L-Methionine methyl ester	Amino acids and derivatives	10332-17-9	down	FALSE	FALSE	FALSE	3.58 × 104	4.09 × 104	3.32 × 104	9.00 × 102	9.00 × 102	9.00 × 102	4.52 × 104	5.73 × 104	4.59 × 104	9.00 × 102	1.13 × 104	8.05 × 103	--	--
pme0021	C9H11NO2	L-Phenylalanine	Amino acids and derivatives	63-91-2	down	FALSE	FALSE	FALSE	4.50 × 106	4.55 × 106	4.83 × 106	2.49 × 106	1.78 × 106	2.10 × 106	2.51 × 106	2.42 × 106	2.53 × 106	2.06 × 106	2.01 × 106	2.00 × 106	C00079	ko00360,ko00400,ko00460,ko00940,ko00960,ko00966,ko00970,ko00998,ko01100,ko01110,ko01210,ko01230,ko02010
pme0124	C7H12N2O3	L-Glycyl-L-proline	Amino acids and derivatives	704-15-4	down	FALSE	down	FALSE	3.95 × 104	5.24 × 104	7.05 × 104	1.86 × 104	2.73 × 104	2.33 × 104	2.30 × 104	2.79 × 104	2.47 × 104	3.04 × 104	3.53 × 104	4.50 × 104	--	--
Zmyn000155	C7H14N2O3	N-α-Acetyl-L-ornithine	Amino acids and derivatives	6205-08-9	FALSE	FALSE	up	up	8.54 × 105	6.57 × 105	5.57 × 105	6.95 × 105	6.88 × 105	6.81 × 105	1.97 × 106	1.82 × 106	1.70 × 106	2.64 × 106	2.60 × 106	2.90 × 106	C00437	ko00220,ko01100,ko01110,ko01210,ko01230
MWSmce119	C6H14N4O2	L-Arginine	Amino acids and derivatives	74-79-3	FALSE	FALSE	up	up	2.36 × 107	1.86 × 107	1.76 × 107	2.11 × 107	1.75 × 107	1.43 × 107	5.19 × 107	5.44 × 107	4.72 × 107	7.48 × 107	6.70 × 107	7.43 × 107	C00062	ko00220,ko00261,ko00330,ko00472,ko00970,ko01100,ko01110,ko01230,ko02010
pme2602	C3H8NO6P	O-Phospho-L-serine	Amino acids and derivatives	407-41-0	down	FALSE	FALSE	up	7.85 × 103	4.93 × 103	1.84 × 104	9.00 × 102	9.00 × 102	9.00 × 102	1.65 × 104	1.86 × 104	9.00 × 102	6.33 × 103	6.42 × 103	6.31 × 103	C01005	ko00260,ko00270,ko00970,ko01100,ko01110,ko01200,ko01230
mws0736	C8H16N2O3	N-Glycyl-L-leucine	Amino acids and derivatives	869-19-2	down	FALSE	down	FALSE	1.04 × 106	1.29 × 106	1.42 × 106	4.58 × 105	4.36 × 105	5.13 × 105	5.79 × 105	5.69 × 105	6.67 × 105	6.90 × 105	6.65 × 105	6.20 × 105	C02155	--
mws5041	C8H16N2O3	L-Glycyl-L-isoleucine	Amino acids and derivatives	19461-38-2	down	FALSE	down	FALSE	9.44 × 105	1.18 × 106	1.30 × 106	4.78 × 105	4.47 × 105	4.57 × 105	5.58 × 105	4.69 × 105	6.41 × 105	6.51 × 105	6.41 × 105	6.37 × 105	--	--
pme0122	C8H16N2O3	N6-Acetyl-L-lysine	Amino acids and derivatives	692-04-6	FALSE	FALSE	down	FALSE	8.10 × 104	8.03 × 104	9.60 × 104	6.36 × 104	8.81 × 104	4.83 × 104	2.99 × 104	3.24 × 104	4.92 × 104	6.04 × 104	6.91 × 104	4.45 × 104	C02727	ko00310,ko01100
pme3388	C7H16N4O2	Homoarginine	Amino acids and derivatives	156-86-5	FALSE	FALSE	up	up	4.02 × 104	4.17 × 104	4.53 × 104	5.30 × 104	5.29 × 104	4.49 × 104	1.04 × 105	1.24 × 105	1.20 × 105	1.89 × 105	2.15 × 105	2.45 × 105	C01924	--
Zmjp000182	C7H16N4O2	N-Monomethyl-L-arginine	Amino acids and derivatives	17035-90-4	FALSE	FALSE	up	up	5.18 × 105	5.71 × 105	5.36 × 105	3.85 × 105	3.23 × 105	4.64 × 105	1.15 × 106	1.04 × 106	1.18 × 106	1.64 × 106	1.12 × 106	1.20 × 106	C03884	--
Zmzp000145	C9H20N2O2	Trimethyllysine	Amino acids and derivatives	23284-33-5	FALSE	down	up	FALSE	6.99 × 105	7.27 × 105	9.67 × 105	6.02 × 105	7.58 × 105	8.86 × 105	2.16 × 106	1.42 × 106	2.10 × 106	9.18 × 105	7.85 × 105	8.44 × 105	C03793	ko00310,ko01100
MWSslk140	C7H13NO3S	N-Acetyl-L-Methionine	Amino acids and derivatives	65-82-7	down	down	down	FALSE	1.45 × 105	1.53 × 105	1.40 × 105	2.22 × 104	1.49 × 104	2.77 × 104	8.52 × 104	5.53 × 104	7.60 × 104	2.94 × 104	3.20 × 104	3.55 × 104	C02712	--
pme3827	C9H11NO4	3,4-Dihydroxy-L-phenylalanine (L-Dopa)	Amino acids and derivatives	59-92-7	down	FALSE	down	up	2.00 × 105	3.99 × 105	4.42 × 105	8.50 × 103	1.81 × 104	1.38 × 104	4.48 × 104	1.05 × 105	8.12 × 104	7.32 × 104	8.77 × 104	7.80 × 104	C00355	ko00350,ko00950,ko00965,ko01100,ko01110
NK10251888	C8H18N4O2	NG,NG-Dimethyl-L-arginine	Amino acids and derivatives	30315-93-6	FALSE	FALSE	FALSE	up	5.07 × 105	6.53 × 105	5.07 × 105	2.54 × 105	3.08 × 105	3.95 × 105	6.45 × 105	6.08 × 105	5.22 × 105	8.94 × 105	8.55 × 105	9.15 × 105	C03626	--
mws0282	C11H12N2O2	L-Tryptophan	Amino acids and derivatives	73-22-3	up	FALSE	FALSE	down	5.95 × 106	6.64 × 106	6.57 × 106	2.75 × 107	1.03 × 107	1.86 × 107	6.78 × 106	5.97 × 106	5.77 × 106	8.69 × 106	8.17 × 106	7.34 × 106	C00078	ko00260,ko00380,ko00400,ko00901,ko00966,ko00970,ko00998,ko01100,ko01110,ko01210,ko01230,ko01240
pme2566	C8H14N2O5	5-L-Glutamyl-L-amino acid	Amino acids and derivatives	5875-41-2	FALSE	FALSE	up	up	9.86 × 104	5.18 × 104	6.80 × 104	6.28 × 104	7.50 × 104	8.03 × 104	1.93 × 105	2.62 × 105	3.29 × 105	1.58 × 105	1.69 × 105	1.38 × 105	--	--
pme1228	C11H12N2O3	5-Hydroxy-L-tryptophan	Amino acids and derivatives	56-69-9	up	FALSE	FALSE	FALSE	7.06 × 103	1.45 × 104	1.16 × 104	3.10 × 104	1.75 × 104	2.94 × 104	2.28 × 104	1.39 × 104	1.99 × 104	2.96 × 104	3.43 × 104	3.43 × 104	C00643	ko00380,ko01100
MWS4296	C11H14N2O3	Glycylphenylalanine	Amino acids and derivatives	3321-03-7	down	FALSE	down	FALSE	8.98 × 105	1.01 × 106	1.05 × 106	3.15 × 105	2.58 × 105	3.25 × 105	4.33 × 105	4.23 × 105	5.03 × 105	4.21 × 105	4.76 × 105	4.56 × 105	--	--
mws5042	C11H14N2O3	L-Glycyl-L-phenylalanine	Amino acids and derivatives	721-66-4	down	FALSE	down	FALSE	9.32 × 105	1.12 × 106	1.02 × 106	2.75 × 105	2.56 × 105	3.00 × 105	3.94 × 105	4.17 × 105	5.47 × 105	4.22 × 105	3.61 × 105	3.89 × 105	--	--
Lmhp001461	C11H20N2O3	L-Prolyl-L-Leucine	Amino acids and derivatives	52899-07-7	down	FALSE	FALSE	FALSE	1.05 × 106	1.45 × 106	1.78 × 106	3.38 × 105	3.66 × 105	3.82 × 105	9.21 × 105	6.94 × 105	7.98 × 105	4.60 × 105	4.29 × 105	5.09 × 105	--	--
Lmhp001670	C11H22N2O3	L-Valyl-L-Leucine	Amino acids and derivatives	3989-97-7	down	FALSE	down	FALSE	1.66 × 106	2.14 × 106	2.12 × 106	3.12 × 105	3.05 × 105	3.35 × 105	5.80 × 105	6.23 × 105	6.76 × 105	4.64 × 105	4.37 × 105	5.05 × 105	--	--
mws4176	C12H16N2O3	L-Alanyl-L-Phenylalanine	Amino acids and derivatives	3061-90-3	down	down	down	FALSE	3.73 × 105	4.75 × 105	4.54 × 105	6.06 × 104	5.09 × 104	5.31 × 104	1.83 × 105	1.45 × 105	1.57 × 105	7.74 × 104	7.43 × 104	8.70 × 104	--	--
MWStz205	C14H16N2O2	Cyclo(D-Phe-L-Pro)	Amino acids and derivatives	26488-24-4	down	FALSE	FALSE	up	5.28 × 103	5.30 × 103	6.03 × 103	9.00 × 102	9.00 × 102	9.00 × 102	1.32 × 103	5.37 × 103	4.62 × 103	3.99 × 103	6.65 × 102	4.66 × 103	--	--
MWStz255	C14H16N2O2	Cyclo(Pro-Phe)	Amino acids and derivatives	3705-26-8	down	FALSE	FALSE	up	3.97 × 103	2.65 × 103	4.68 × 103	1.32 × 103	1.28 × 103	2.65 × 103	2.65 × 103	1.33 × 103	3.31 × 103	7.95 × 103	3.31 × 103	3.33 × 103	C11847	--
Lmhp002031	C12H24N2O3	L-Leucyl-L-Leucine	Amino acids and derivatives	3303-31-9	down	down	down	FALSE	1.18 × 106	1.85 × 106	1.53 × 106	3.54 × 104	1.60 × 104	3.69 × 104	3.97 × 105	4.21 × 105	5.83 × 105	7.23 × 104	2.98 × 104	7.22 × 104	--	--
pmb2591	C13H14N2O3	N-Acetyl-L-Tryptophan	Amino acids and derivatives	1218-34-4	FALSE	FALSE	FALSE	down	7.62 × 104	9.27 × 104	9.94 × 104	6.74 × 104	5.94 × 104	8.09 × 104	4.95 × 104	4.56 × 104	4.43 × 104	1.86 × 104	3.24 × 104	3.86 × 104	--	--
Lmrj002087	C10H18N2O5	L-Isoleucyl-L-Aspartate	Amino acids and derivatives	-	down	down	down	FALSE	3.76 × 105	4.89 × 105	5.29 × 105	5.86 × 104	4.04 × 104	2.48 × 104	9.72 × 104	9.44 × 104	1.38 × 105	2.86 × 104	5.80 × 104	3.65 × 104	--	--
pme2563	C8H14N2O5S	γ-Glu-Cys	Amino acids and derivatives	636-58-8	up	FALSE	up	FALSE	8.43 × 103	1.04 × 104	9.88 × 103	4.61 × 104	6.22 × 104	3.72 × 104	6.45 × 104	4.16 × 104	3.10 × 104	5.17 × 104	6.59 × 104	8.08 × 104	C00669	ko00480,ko01100,ko01240
MWS4309	C13H15N3O3	Glycyl-tryptophan	Amino acids and derivatives	2390-74-1	down	FALSE	FALSE	FALSE	2.37 × 105	2.92 × 105	2.84 × 105	1.22 × 105	1.12 × 105	9.91 × 104	1.46 × 105	1.37 × 105	1.59 × 105	1.73 × 105	1.58 × 105	1.81 × 105	--	--
Lmhp001732	C14H18N2O3	L-Prolyl-L-Phenylalanine	Amino acids and derivatives	13589-02-1	down	FALSE	FALSE	up	3.67 × 104	6.71 × 104	7.19 × 104	1.97 × 104	2.17 × 104	3.55 × 104	4.18 × 104	2.20 × 104	5.03 × 104	7.16 × 104	3.96 × 104	5.89 × 104	--	--
Lmhp002001	C14H20N2O3	L-Valyl-L-Phenylalanine	Amino acids and derivatives	3918-92-1	down	FALSE	down	FALSE	8.88 × 105	1.14 × 106	1.12 × 106	1.41 × 105	1.30 × 105	1.72 × 105	3.47 × 105	3.04 × 105	4.00 × 105	2.16 × 105	1.78 × 105	2.17 × 105	--	--
pme2890	C8H16N2O4S2	L-Homocystine	Amino acids and derivatives	626-72-2	down	down	FALSE	FALSE	1.10 × 105	2.94 × 105	2.20 × 105	6.35 × 104	5.01 × 104	7.06 × 104	2.75 × 105	1.14 × 105	2.83 × 105	8.74 × 104	8.51 × 104	7.56 × 104	C01817	ko00270
Zmdp001663	C10H18N2O5S	γ-glutamylmethionine	Amino acids and derivatives	17663-87-5	down	down	FALSE	up	1.30 × 105	1.25 × 105	9.77 × 104	1.32 × 104	2.05 × 104	1.96 × 104	2.23 × 105	1.41 × 105	1.75 × 105	4.55 × 104	4.54 × 104	4.62 × 104	--	--
mws0629	C13H16N2O5	L-Aspartyl-L-Phenylalanine	Amino acids and derivatives	13433-09-5	down	FALSE	down	FALSE	1.67 × 105	1.91 × 105	2.20 × 105	4.37 × 104	5.56 × 104	4.46 × 104	4.92 × 104	6.20 × 104	7.75 × 104	3.79 × 104	3.90 × 104	4.26 × 104	--	--
pme1086	C10H17N3O6S	Glutathione reduced form	Amino acids and derivatives	70-18-8	up	up	up	FALSE	4.21 × 104	4.47 × 104	4.12 × 104	1.16 × 106	1.44 × 106	1.29 × 106	5.82 × 105	4.29 × 105	3.29 × 105	1.24 × 106	2.63 × 106	1.88 × 106	C00051	ko00270,ko00480,ko01100,ko01240,ko02010
mws0636	C18H20N2O3	L-Phenylalanyl-L-phenylalanine	Amino acids and derivatives	2577-40-4	down	down	FALSE	FALSE	6.54 × 104	4.34 × 104	4.50 × 104	2.04 × 103	8.84 × 103	8.79 × 103	3.24 × 104	2.55 × 104	2.41 × 104	1.03 × 104	7.54 × 103	6.46 × 103	--	--
mws0582	C11H19N3O6S	S-(Methyl)glutathione	Amino acids and derivatives	2922-56-7	FALSE	FALSE	FALSE	up	1.45 × 105	1.09 × 105	1.39 × 105	1.35 × 105	1.20 × 105	1.00 × 105	1.84 × 105	1.96 × 105	2.10 × 105	2.90 × 105	2.80 × 105	2.32 × 105	C11347	--
MWS2426	C16H19N3O5	Tryptophan glutamic acid	Amino acids and derivatives	36099-95-3	down	FALSE	down	FALSE	1.00 × 104	1.42 × 104	9.51 × 103	6.72 × 103	4.23 × 103	5.69 × 103	6.50 × 103	2.74 × 103	4.93 × 103	5.27 × 103	1.62 × 103	5.04 × 103	--	--
pme1286	C14H20N6O5S	S-(5'-Adenosy)-L-homocysteine	Amino acids and derivatives	979-92-0	FALSE	FALSE	up	FALSE	3.79 × 105	3.17 × 105	3.14 × 105	4.08 × 105	9.00 × 102	6.05 × 105	1.16 × 106	6.08 × 105	6.41 × 105	4.81 × 105	5.15 × 105	4.96 × 105	C00021	ko00270,ko01100,ko01230,ko01240
