# Supplementary material for: Integrated Metabolome and Transcriptome Analyses Reveal Amino Acid Biosynthesis Mechanisms during the Physiological Maturity of Grains in Yunnan Hulled Wheat (Triticum aestivum ssp. yunnanense King)
Source: Int J Mol Sci. 2023 Aug 30;24(17):13475. doi: 10.3390/ijms241713475 (PMC10487551; doi:10.3390/ijms241713475)
Supplement: Supplementary file 1 [file ijms-24-13475-s001.zip › Table S8.xlsx]

## Sheet: Table S8
Table S8.Summary Statistics of RNA-seq Results using two Yunnan hulled wheat lines at WG and MG.
Sample name	Raw Reads	Clean Reads	Clean Base(G)	Q30(%)	GC Content(%)	Reads mapped	Unique mapped	Multi mapped	Expressed gene	Novel transcripts
DWG-1	101915912	97765346	14.66	93.82	58.43	91527285(93.62%)	84204264(86.13%)	7323021(7.49%)	16420	5926
DWG-2	101870698	100050734	15.01	94.34	59.55	94860760(94.81%)	87959390(87.91%)	6901370(6.90%)	16601	6134
DWG-3	119528478	113407820	17.01	93.84	59.17	106369089(93.79%)	97674680(86.13%)	8694409(7.67%)	16661	6228
DMG-1	102761708	94607902	14.19	94.09	59.16	87867200(92.88%)	76476581(80.84%)	11390619(12.04%)	16398	6277
DMG-2	98096380	90819306	13.62	93.56	59.12	84202244(92.71%)	74650377(82.20%)	9551867(10.52%)	16557	6309
DMG-3	98404740	95142794	14.27	93.9	58.17	78589381(82.60%)	69303799(72.84%)	9285582(9.76%)	15389	5724
YWG-1	98190654	89318770	13.4	94.1	58.39	84922245(95.08%)	76552179(85.71%)	8370066(9.37%)	16169	5713
YWG-2	93946588	85122714	12.77	94.23	56.68	81333918(95.55%)	74455307(87.47%)	6878611(8.08%)	16249	5712
YWG-3	98913496	95244602	14.29	93.81	58.18	88547794(92.97%)	81195422(85.25%)	7352372(7.72%)	16492	5874
YMG-1	75895498	69574438	10.44	93.91	58.52	65782041(94.55%)	59812152(85.97%)	5969889(8.58%)	15794	5696
YMG-2	109171524	103126184	15.47	93.65	57.45	97244744(94.30%)	89884435(87.16%)	7360309(7.14%)	16333	5899
YMG-3	96208996	92586340	13.89	94.05	59.19	87886846(94.92%)	79516729(85.88%)	8370117(9.04%)	16246	5826
