# Supplementary material for: Integrated Metabolome and Transcriptome Analyses Reveal Amino Acid Biosynthesis Mechanisms during the Physiological Maturity of Grains in Yunnan Hulled Wheat (Triticum aestivum ssp. yunnanense King)
Source: Int J Mol Sci. 2023 Aug 30;24(17):13475. doi: 10.3390/ijms241713475 (PMC10487551; doi:10.3390/ijms241713475)
Supplement: Supplementary file 1 [file ijms-24-13475-s001.zip › Table S9.xlsx]

## Sheet: Table S9
Table S9.Gene Ontology enrichment analysis of DEGs functional groups in two Yunnan hulled wheat lines between WG and MG.
Ontology	ID	Description
Cellular component	GO:0032991	protein-containing complex
Cellular component	GO:0110165	cellular anatomical entity
Biological process	GO:0000003	reproduction
Biological process	GO:0002376	immune system process
Biological process	GO:0008152	metabolic process
Biological process	GO:0009987	cellular process
Biological process	GO:0019740	nitrogen utilization
Biological process	GO:0022414	reproductive process
Biological process	GO:0022610	biological adhesion
Biological process	GO:0023052	signaling
Biological process	GO:0032501	multicellular organismal process
Biological process	GO:0032502	developmental process
Biological process	GO:0040007	growth
Biological process	GO:0040011	locomotion
Biological process	GO:0044419	biological process involved in interspecies interaction between organisms
Biological process	GO:0048511	rhythmic process
Biological process	GO:0048518	positive regulation of biological process
Biological process	GO:0048519	negative regulation of biological process
Biological process	GO:0050789	regulation of biological process
Biological process	GO:0050896	response to stimulus
Biological process	GO:0051179	localization
Biological process	GO:0051703	biological process involved in intraspecies interaction between organisms
Biological process	GO:0051704	multi-organism process
Biological process	GO:0065007	biological regulation
Biological process	GO:0098754	detoxification
Molecular function	GO:0003824	catalytic activity
Molecular function	GO:0005198	structural molecule activity
Molecular function	GO:0005215	transporter activity
Molecular function	GO:0005488	binding
Molecular function	GO:0016209	antioxidant activity
Molecular function	GO:0031386	protein tag
Molecular function	GO:0044183	protein folding chaperone
Molecular function	GO:0045182	translation regulator activity
Molecular function	GO:0045735	nutrient reservoir activity
Molecular function	GO:0060089	molecular transducer activity
Molecular function	GO:0060090	molecular adaptor activity
Molecular function	GO:0090729	toxin activity
Molecular function	GO:0098772	molecular function regulator
Molecular function	GO:0140104	molecular carrier activity
Molecular function	GO:0140110	transcription regulator activity
Molecular function	GO:0140299	small molecule sensor activity
