# Supplementary material for: Integrated Metabolome and Transcriptome Analyses Reveal Amino Acid Biosynthesis Mechanisms during the Physiological Maturity of Grains in Yunnan Hulled Wheat (Triticum aestivum ssp. yunnanense King)
Source: Int J Mol Sci. 2023 Aug 30;24(17):13475. doi: 10.3390/ijms241713475 (PMC10487551; doi:10.3390/ijms241713475)
Supplement: Supplementary file 1 [file ijms-24-13475-s001.zip › Table S10.xlsx]

## Sheet: Table S10
Table S10. Significant differences in gene information annotated in the KEGG pathway among comparative groups of two Yunnan hulled wheat lines.
DWG_vs_DMG.diff.annot
ID	log2FoldChange	pvalue	padj	regulated	KEGG	KEGG pathway
TraesCSU02G183800	1.53631	4.57179e-05	0.000304615	up	K01179 endoglucanase [EC:3.2.1.4] | (RefSeq) endoglucanase 10 (A)	ko00500: Starch and sucrose metabolism; ko01100: Metabolic pathways
TraesCSU02G175200	-8.67605	1.13913e-10	2.38295e-09	down	K13993 HSP20 family protein | (RefSeq) 16.9 kDa class I heat shock protein 1-like (A)	ko04141: Protein processing in endoplasmic reticulum
TraesCSU02G163500	3.39824	1.13483e-06	1.12913e-05	up	K14018 phospholipase A-2-activating protein | (RefSeq) uncharacterized protein LOC123103555 isoform X1 (A)	ko04141: Protein processing in endoplasmic reticulum
TraesCSU02G142700	2.7213	0.0150825	0.0431977	up	K19893 glucan endo-1,3-beta-glucosidase 5/6 [EC:3.2.1.39] | (RefSeq) glucan endo-1,3-beta-glucosidase 6-like (A)	ko00500: Starch and sucrose metabolism; ko01100: Metabolic pathways
TraesCSU02G129100	1.73434	0.00428371	0.0153124	up	K10848 DNA excision repair protein ERCC-4 [EC:3.1.-.-] | (RefSeq) hypothetical protein (A)	ko03420: Nucleotide excision repair
TraesCSU02G123400	1.09089	0.000212343	0.00117156	up	K18532 adenylate kinase [EC:2.7.4.3] | (RefSeq) adenylate kinase isoenzyme 6 homolog (A)	ko00230: Purine metabolism; ko01100: Metabolic pathways; ko01110: Biosynthesis of secondary metabolites; ko01232: Nucleotide metabolism; ko01240: Biosynthesis of cofactors; ko03008: Ribosome biogenesis in eukaryotes
TraesCSU02G122100	2.50618	1.02813e-17	5.32379e-16	up	K13227 UDP-glucosyltransferase BX8/BX9 [EC:2.4.1.202] | (RefSeq) DIMBOA UDP-glucosyltransferase BX8-like (A)	ko00402: Benzoxazinoid biosynthesis; ko01110: Biosynthesis of secondary metabolites
TraesCSU02G116400	-2.21304	1.00 × 10-21	7.89 × 10-20	down	K04043 molecular chaperone DnaK | (RefSeq) heat shock 70 kDa protein, mitochondrial-like (A)	ko03018: RNA degradation
TraesCSU02G114200	1.00991	0.000259984	0.00139905	up	K12893 serine/arginine-rich splicing factor 4/5/6 | (RefSeq) serine/arginine-rich splicing factor RS31-like (A)	ko03040: Spliceosome
TraesCSU02G109200	1.04379	0.00666089	0.0221326	up	K08339 autophagy-related protein 5 | (RefSeq) autophagy protein 5-like (A)	ko04136: Autophagy - other
TraesCSU02G093300	-2.56728	0.0162392	0.045865	down	K13227 UDP-glucosyltransferase BX8/BX9 [EC:2.4.1.202] | (RefSeq) DIMBOA UDP-glucosyltransferase BX8-like (A)	ko00402: Benzoxazinoid biosynthesis; ko01110: Biosynthesis of secondary metabolites
TraesCSU02G091900	1.98182	3.07931e-14	1.07937e-12	up	K13412 calcium-dependent protein kinase [EC:2.7.11.1] | (RefSeq) CPK17-1_1; calcium dependent protein kinase 17 (A)	ko04626: Plant-pathogen interaction
TraesCSU02G086500	1.09475	0.00102211	0.00455682	up	K18532 adenylate kinase [EC:2.7.4.3] | (RefSeq) adenylate kinase isoenzyme 6 homolog (A)	ko00230: Purine metabolism; ko01100: Metabolic pathways; ko01110: Biosynthesis of secondary metabolites; ko01232: Nucleotide metabolism; ko01240: Biosynthesis of cofactors; ko03008: Ribosome biogenesis in eukaryotes
TraesCSU02G076400	-1.05799	0.00275695	0.0105766	down	K08486 syntaxin 1B/2/3 | (RefSeq) syntaxin-121-like (A)	ko04130: SNARE interactions in vesicular transport
TraesCSU02G067800	1.15937	0.000422867	0.00214014	up	K00858 NAD+ kinase [EC:2.7.1.23] | (RefSeq) probable NAD kinase 2, chloroplastic (A)	ko00760: Nicotinate and nicotinamide metabolism; ko01100: Metabolic pathways; ko01240: Biosynthesis of cofactors
TraesCSU02G053600	1.04437	0.00113558	0.00498293	up	K05677 ATP-binding cassette, subfamily D (ALD), member 3 | (RefSeq) ABC transporter, ATP-binding & transmembrane domain (A)	ko02010: ABC transporters; ko04146: Peroxisome
TraesCSU02G032700	-5.08353	3.90312e-14	1.34695e-12	down	K01177 beta-amylase [EC:3.2.1.2] | (RefSeq) beta-amylase (A)	ko00500: Starch and sucrose metabolism; ko01100: Metabolic pathways; ko01110: Biosynthesis of secondary metabolites
TraesCSU02G017400	1.01194	9.03328e-05	0.0005538	up	K08495 golgi SNAP receptor complex member 1 | (RefSeq) Golgi SNAP receptor complex member 1-2 (A)	ko04130: SNARE interactions in vesicular transport
TraesCSU02G016900	1.15722	0.00434236	0.0154859	up	K13412 calcium-dependent protein kinase [EC:2.7.11.1] | (RefSeq) calcium-dependent protein kinase 4 (A)	ko04626: Plant-pathogen interaction
TraesCS7D02G552800	1.00834	0.00788895	0.0254281	up	K00695 sucrose synthase [EC:2.4.1.13] | (RefSeq) sucrose synthase 7-like isoform X1 (A)	ko00500: Starch and sucrose metabolism; ko01100: Metabolic pathways; ko01110: Biosynthesis of secondary metabolites
TraesCS7D02G546600	1.40505	1.63111e-09	2.82082e-08	up	K03363 cell division cycle 20, cofactor of APC complex | (RefSeq) cell division cycle 20.2, cofactor of APC complex-like isoform X1 (A)	ko04120: Ubiquitin mediated proteolysis
TraesCS7D02G541400	-4.06586	1.79243e-06	1.69995e-05	down	K22588 acetylserotonin O-methyltransferase, plant [EC:2.1.1.4] | (RefSeq) acetylserotonin O-methyltransferase 1-like (A)	ko00380: Tryptophan metabolism; ko01100: Metabolic pathways; ko01110: Biosynthesis of secondary metabolites
TraesCS7D02G541300	1.9202	5.06503e-05	0.000332959	up	K13346 peroxin-10 | (RefSeq) stress-response A/B barrel domain-containing protein UP3-like (A)	ko04146: Peroxisome
TraesCS7D02G539200	1.20683	0.000202879	0.00112514	up	K04120 ent-copalyl diphosphate synthase [EC:5.5.1.13] | (RefSeq) ent-copalyl diphosphate synthase 1, chloroplastic isoform X1 (A)	ko00904: Diterpenoid biosynthesis; ko01100: Metabolic pathways; ko01110: Biosynthesis of secondary metabolites
TraesCS7D02G535400	-4.1463	7.59198e-08	9.62082e-07	down	K00700 1,4-alpha-glucan branching enzyme [EC:2.4.1.18] | (RefSeq) 1,4-alpha-glucan-branching enzyme, chloroplastic/amyloplastic-like isoform X1 (A)	ko00500: Starch and sucrose metabolism; ko01100: Metabolic pathways; ko01110: Biosynthesis of secondary metabolites
TraesCS7D02G534700	-2.72496	1.59031e-18	9.05916e-17	down	K20547 basic endochitinase B [EC:3.2.1.14] | (RefSeq) basic endochitinase C (A)	ko00520: Amino sugar and nucleotide sugar metabolism; ko01100: Metabolic pathways; ko04016: MAPK signaling pathway - plant
TraesCS7D02G517800	-1.20502	3.90293e-05	0.000264934	down	K09487 heat shock protein 90kDa beta | (RefSeq) endoplasmin homolog isoform X1 (A)	ko04141: Protein processing in endoplasmic reticulum; ko04626: Plant-pathogen interaction
TraesCS7D02G516500	2.29958	1.37456e-16	6.28956e-15	up	K18081 myotubularin-related protein 1/2 [EC:3.1.3.64 3.1.3.95] | (RefSeq) phosphatidylinositol-3-phosphatase myotubularin-2-like (A)	ko00562: Inositol phosphate metabolism; ko01100: Metabolic pathways; ko04070: Phosphatidylinositol signaling system
TraesCS7D02G505200	1.02316	0.00198846	0.00800441	up	K03125 transcription initiation factor TFIID subunit 1 [EC:2.3.1.48 2.7.11.1] | (RefSeq) transcription initiation factor TFIID subunit 1-like (A)	ko03022: Basal transcription factors
TraesCS7D02G498300	-1.84634	0.008813	0.0278264	down	K09842 abscisic-aldehyde oxidase [EC:1.2.3.14] | (RefSeq) putative aldehyde oxidase-like protein isoform X1 (A)	ko00906: Carotenoid biosynthesis; ko01100: Metabolic pathways; ko01110: Biosynthesis of secondary metabolites
TraesCS7D02G498100	-1.57084	0.0039181	0.014229	down	K09842 abscisic-aldehyde oxidase [EC:1.2.3.14] | (RefSeq) putative aldehyde oxidase-like protein isoform X1 (A)	ko00906: Carotenoid biosynthesis; ko01100: Metabolic pathways; ko01110: Biosynthesis of secondary metabolites
TraesCS7D02G493000	2.04899	5.81075e-07	6.15845e-06	up	K13265 vestitone reductase [EC:1.1.1.348] | (RefSeq) uncharacterized protein LOC100794209 (A)	ko00943: Isoflavonoid biosynthesis; ko01100: Metabolic pathways; ko01110: Biosynthesis of secondary metabolites
TraesCS7D02G492800	1.86762	1.75901e-06	1.67241e-05	up	K13265 vestitone reductase [EC:1.1.1.348] | (RefSeq) uncharacterized protein LOC100794209 (A)	ko00943: Isoflavonoid biosynthesis; ko01100: Metabolic pathways; ko01110: Biosynthesis of secondary metabolites
TraesCS7D02G488800	1.85268	0.00707445	0.0232655	up	K15404 aldehyde decarbonylase [EC:4.1.99.5] | (RefSeq) CER1-2; hypothetical protein (A)	ko00073: Cutin, suberine and wax biosynthesis; ko01110: Biosynthesis of secondary metabolites
TraesCS7D02G482600	-1.31486	0.00996	0.0307634	down	K09833 homogentisate phytyltransferase / homogentisate geranylgeranyltransferase [EC:2.5.1.115 2.5.1.116] | (RefSeq) probable homogentisate phytyltransferase 1, chloroplastic (A)	ko00130: Ubiquinone and other terpenoid-quinone biosynthesis; ko01100: Metabolic pathways; ko01110: Biosynthesis of secondary metabolites; ko01240: Biosynthesis of cofactors
TraesCS7D02G479800	1.64274	7.67786e-06	6.28445e-05	up	K13457 disease resistance protein RPM1 | (RefSeq) disease resistance protein RPM1 (A)	ko04626: Plant-pathogen interaction
TraesCS7D02G477600	-1.77382	0.00733265	0.0239857	down	K10583 ubiquitin-conjugating enzyme E2 S [EC:2.3.2.23] | (RefSeq) ubiquitin-conjugating enzyme E2 22-like (A)	ko04120: Ubiquitin mediated proteolysis
TraesCS7D02G474700	-1.21932	3.13088e-07	3.52719e-06	down	K01968 3-methylcrotonyl-CoA carboxylase alpha subunit [EC:6.4.1.4] | (RefSeq) LOW QUALITY PROTEIN: methylcrotonoyl-CoA carboxylase subunit alpha, mitochondrial (A)	ko00280: Valine, leucine and isoleucine degradation; ko01100: Metabolic pathways
TraesCS7D02G473200	1.0653	4.1959e-06	3.65238e-05	up	K08852 serine/threonine-protein kinase/endoribonuclease IRE1 [EC:2.7.11.1 3.1.26.-] | (RefSeq) serine/threonine-protein kinase/endoribonuclease IRE1a (A)	ko04141: Protein processing in endoplasmic reticulum
TraesCS7D02G472400	-2.39337	6.84589e-06	5.68701e-05	down	K05756 actin related protein 2/3 complex, subunit 3 | (RefSeq) actin-related protein 2/3 complex subunit 3-like isoform X1 (A)	ko04144: Endocytosis
TraesCS7D02G467800	-2.04234	3.03489e-05	0.00021201	down	K02636 cytochrome b6-f complex iron-sulfur subunit [EC:7.1.1.6] | (RefSeq) cytochrome b6-f complex iron-sulfur subunit, chloroplastic-like (A)	ko00195: Photosynthesis; ko01100: Metabolic pathways
TraesCS7D02G467500	-1.83969	0.00224243	0.00886991	down	K03405 magnesium chelatase subunit I [EC:6.6.1.1] | (RefSeq) magnesium-chelatase subunit ChlI, chloroplastic (A)	ko00860: Porphyrin metabolism; ko01100: Metabolic pathways; ko01110: Biosynthesis of secondary metabolites
TraesCS7D02G465400	1.65056	0.00129104	0.00555127	up	K00799 glutathione S-transferase [EC:2.5.1.18] | (RefSeq) probable glutathione S-transferase GSTU6 (A)	ko00480: Glutathione metabolism; ko01100: Metabolic pathways
TraesCS7D02G464800	-1.03767	2.53129e-06	2.31847e-05	down	K10597 ubiquitin conjugation factor E4 B [EC:2.3.2.27] | (RefSeq) probable ubiquitin conjugation factor E4 (A)	ko04120: Ubiquitin mediated proteolysis; ko04141: Protein processing in endoplasmic reticulum
TraesCS7D02G463200	-1.01551	0.000273298	0.00145924	down	K02957 small subunit ribosomal protein S15Ae | (RefSeq) 40S ribosomal protein S15a-5-like (A)	ko03010: Ribosome
TraesCS7D02G460300	1.49779	0.0168845	0.0473376	up	K13248 pyridoxal phosphate phosphatase PHOSPHO2 [EC:3.1.3.74] | (RefSeq) inorganic pyrophosphatase 2-like (A)	ko00750: Vitamin B6 metabolism; ko01100: Metabolic pathways; ko01240: Biosynthesis of cofactors
TraesCS7D02G457800	1.01459	5.518e-08	7.17796e-07	up	K15631 molybdenum cofactor sulfurtransferase [EC:2.8.1.9] | (RefSeq) molybdenum cofactor sulfurase-like (A)	ko00790: Folate biosynthesis; ko01100: Metabolic pathways
TraesCS7D02G451800	3.97486	0.00040065	0.00204297	up	K01187 alpha-glucosidase [EC:3.2.1.20] | (RefSeq) alpha-glucosidase isoform X1 (A)	ko00052: Galactose metabolism; ko00500: Starch and sucrose metabolism; ko01100: Metabolic pathways; ko01110: Biosynthesis of secondary metabolites
TraesCS7D02G450900	-2.98654	6.77912e-12	1.72756e-10	down	K14493 gibberellin receptor GID1 [EC:3.-.-.-] | (RefSeq) GID1b-1; hypothetical protein (A)	ko04075: Plant hormone signal transduction
TraesCS7D02G443200	1.40655	0.00032684	0.00171047	up	K14003 prolactin regulatory element-binding protein | (RefSeq) SEC12-like protein 1 (A)	ko04141: Protein processing in endoplasmic reticulum
TraesCS7D02G442900	1.69353	5.46742e-14	1.85566e-12	up	K08770 ubiquitin C | (RefSeq) polyubiquitin (A)	ko04120: Ubiquitin mediated proteolysis
TraesCS7D02G442700	2.37915	3.27999e-08	4.48254e-07	up	K08770 ubiquitin C | (RefSeq) polyubiquitin (A)	ko04120: Ubiquitin mediated proteolysis
TraesCS7D02G440000	-2.80052	8.68435e-09	1.3208e-07	down	K13082 bifunctional dihydroflavonol 4-reductase/flavanone 4-reductase [EC:1.1.1.219 1.1.1.234] | (RefSeq) dihydroflavonol-4-reductase-like (A)	ko00941: Flavonoid biosynthesis; ko01100: Metabolic pathways; ko01110: Biosynthesis of secondary metabolites
TraesCS7D02G436800	-1.77097	9.30699e-13	2.65935e-11	down	K14486 auxin response factor | (GenBank) auxin response factor 2 (A)	ko04075: Plant hormone signal transduction
TraesCS7D02G436300	1.00702	0.00218817	0.00869061	up	K13457 disease resistance protein RPM1 | (RefSeq) disease resistance protein RPM1 (A)	ko04626: Plant-pathogen interaction
TraesCS7D02G432800	-2.36018	0.0125132	0.0371045	down	K13229 2,4-dihydroxy-1,4-benzoxazin-3-one-glucoside dioxygenase [EC:1.14.11.59] | (RefSeq) DIBOA-glucoside dioxygenase BX6-like (A)	ko00402: Benzoxazinoid biosynthesis; ko01110: Biosynthesis of secondary metabolites
TraesCS7D02G431500	-4.41586	1.68759e-09	2.90909e-08	down	K21456 glutathione synthase [EC:6.3.2.3] | (RefSeq) glutathione synthetase, chloroplastic-like isoform X1 (A)	ko00270: Cysteine and methionine metabolism; ko00480: Glutathione metabolism; ko01100: Metabolic pathways; ko01240: Biosynthesis of cofactors
TraesCS7D02G426000	-1.34971	0.00426379	0.0152484	down	K13415 protein brassinosteroid insensitive 1 [EC:2.7.10.1 2.7.11.1] | (RefSeq) systemin receptor SR160 (A)	ko04075: Plant hormone signal transduction
TraesCS7D02G420500	-1.01924	8.90753e-09	1.35244e-07	down	K00430 peroxidase [EC:1.11.1.7] | (RefSeq) peroxidase 16-like (A)	ko00940: Phenylpropanoid biosynthesis; ko01100: Metabolic pathways; ko01110: Biosynthesis of secondary metabolites
TraesCS7D02G419400	-7.59318	1.55143e-07	1.8503e-06	down	K14504 xyloglucan:xyloglucosyl transferase TCH4 [EC:2.4.1.207] | (RefSeq) xyloglucan endotransglucosylase/hydrolase protein 24-like (A)	ko04075: Plant hormone signal transduction
TraesCS7D02G416600	-1.68651	0.00184083	0.00750609	down	K03809 NAD(P)H dehydrogenase (quinone) [EC:1.6.5.2] | (RefSeq) probable NAD(P)H dehydrogenase (quinone) FQR1-like 1 (A)	ko00130: Ubiquinone and other terpenoid-quinone biosynthesis; ko01100: Metabolic pathways; ko01110: Biosynthesis of secondary metabolites; ko01240: Biosynthesis of cofactors
TraesCS7D02G414900	-2.57544	0.00179599	0.00735079	down	K20535 mitogen-activated protein kinase 1/2 [EC:2.7.11.24] | (RefSeq) mitogen-activated protein kinase 4-like isoform X1 (A)	ko04016: MAPK signaling pathway - plant
TraesCS7D02G414700	-1.36603	9.60987e-07	9.71338e-06	down	K20535 mitogen-activated protein kinase 1/2 [EC:2.7.11.24] | (RefSeq) mitogen-activated protein kinase 4 (A)	ko04016: MAPK signaling pathway - plant
TraesCS7D02G414500	2.01273	0.00019658	0.0010952	up	K14493 gibberellin receptor GID1 [EC:3.-.-.-] | (RefSeq) GID1b-1; hypothetical protein (A)	ko04075: Plant hormone signal transduction
TraesCS7D02G412300	2.29622	6.77834e-05	0.00043015	up	K00261 glutamate dehydrogenase (NAD(P)+) [EC:1.4.1.3] | (RefSeq) glutamate dehydrogenase 1, mitochondrial-like (A)	ko00220: Arginine biosynthesis; ko00250: Alanine, aspartate and glutamate metabolism; ko00910: Nitrogen metabolism; ko01100: Metabolic pathways; ko01200: Carbon metabolism
TraesCS7D02G409700	2.66158	4.09949e-08	5.47383e-07	up	K14486 auxin response factor | (RefSeq) auxin response factor 7 (A)	ko04075: Plant hormone signal transduction
TraesCS7D02G407800	-1.57261	0.00688819	0.0227677	down	K10798 poly [ADP-ribose] polymerase 2/3/4 [EC:2.4.2.30] | (RefSeq) poly [ADP-ribose] polymerase 2-A-like (A)	ko03410: Base excision repair
TraesCS7D02G407700	3.30661	6.41486e-06	5.36393e-05	up	K01845 glutamate-1-semialdehyde 2,1-aminomutase [EC:5.4.3.8] | (RefSeq) Glutamate-1-semialdehyde 2,1-aminomutase, chloroplastic (A)	ko00860: Porphyrin metabolism; ko01100: Metabolic pathways; ko01110: Biosynthesis of secondary metabolites; ko01240: Biosynthesis of cofactors
TraesCS7D02G405500	1.77631	1.46359e-10	3.02268e-09	up	K05894 12-oxophytodienoic acid reductase [EC:1.3.1.42] | (RefSeq) 12-oxophytodienoate reductase 7 (A)	ko00592: alpha-Linolenic acid metabolism; ko01100: Metabolic pathways; ko01110: Biosynthesis of secondary metabolites
TraesCS7D02G405400	3.44079	1.44974e-15	5.88811e-14	up	K13420 LRR receptor-like serine/threonine-protein kinase FLS2 [EC:2.7.11.1] | (RefSeq) LRR receptor-like serine/threonine-protein kinase FLS2 (A)	ko04016: MAPK signaling pathway - plant; ko04626: Plant-pathogen interaction
TraesCS7D02G404500	-2.02727	2.89667e-06	2.61816e-05	down	K15639 PHYB activation tagged suppressor 1 [EC:1.14.-.-] | (RefSeq) cytochrome P450 734A1-like (A)	ko00905: Brassinosteroid biosynthesis; ko01110: Biosynthesis of secondary metabolites
TraesCS7D02G403700	-2.62113	9.61 × 10-24	8.93 × 10-22	down	K20538 mitogen-activated protein kinase 8 [EC:2.7.11.24] | (RefSeq) mitogen-activated protein kinase 8-like isoform X1 (A)	ko04016: MAPK signaling pathway - plant
TraesCS7D02G403600	1.31143	0.00399804	0.0144692	up	K15889 prenylcysteine alpha-carboxyl methylesterase [EC:3.1.1.-] | (RefSeq) probable isoprenylcysteine alpha-carbonyl methylesterase ICMEL1 isoform X1 (A)	ko00900: Terpenoid backbone biosynthesis; ko01100: Metabolic pathways; ko01110: Biosynthesis of secondary metabolites
TraesCS7D02G400200	-3.45339	0.000211213	0.00116616	down	K01051 pectinesterase [EC:3.1.1.11] | (RefSeq) pectinesterase (A)	ko00040: Pentose and glucuronate interconversions; ko01100: Metabolic pathways
TraesCS7D02G396300	1.29647	1.33389e-07	1.61024e-06	up	K00948 ribose-phosphate pyrophosphokinase [EC:2.7.6.1] | (RefSeq) ribose-phosphate pyrophosphokinase 2, chloroplastic-like (A)	ko00030: Pentose phosphate pathway; ko00230: Purine metabolism; ko01100: Metabolic pathways; ko01110: Biosynthesis of secondary metabolites; ko01200: Carbon metabolism; ko01230: Biosynthesis of amino acids
TraesCS7D02G392900	-1.2344	7.67057e-05	0.000479545	down	K03350 anaphase-promoting complex subunit 3 | (RefSeq) cell division cycle protein 27 homolog B-like isoform X1 (A)	ko04120: Ubiquitin mediated proteolysis
TraesCS7D02G392400	-2.36963	6.80× 10-27	8.02 × 10-25	down	K09753 cinnamoyl-CoA reductase [EC:1.2.1.44] | (RefSeq) cinnamoyl-CoA reductase 1-like isoform X1 (A)	ko00940: Phenylpropanoid biosynthesis; ko01100: Metabolic pathways; ko01110: Biosynthesis of secondary metabolites
TraesCS7D02G391900	1.56336	3.84941e-14	1.32928e-12	up	K09753 cinnamoyl-CoA reductase [EC:1.2.1.44] | (RefSeq) cinnamoyl-CoA reductase 1-like isoform X1 (A)	ko00940: Phenylpropanoid biosynthesis; ko01100: Metabolic pathways; ko01110: Biosynthesis of secondary metabolites
TraesCS7D02G384200	4.39804	2.37305e-09	4.0055e-08	up	K13260 isoflavone/4'-methoxyisoflavone 2'-hydroxylase [EC:1.14.14.90 1.14.14.89] | (RefSeq) cytochrome P450 81E8-like (A)	ko00943: Isoflavonoid biosynthesis; ko01100: Metabolic pathways; ko01110: Biosynthesis of secondary metabolites
TraesCS7D02G382200	1.38443	1.35481e-09	2.37135e-08	up	K00873 pyruvate kinase [EC:2.7.1.40] | (RefSeq) uncharacterized protein LOC118033103 isoform X1 (A)	ko00010: Glycolysis / Gluconeogenesis; ko00620: Pyruvate metabolism; ko01100: Metabolic pathways; ko01110: Biosynthesis of secondary metabolites; ko01200: Carbon metabolism; ko01230: Biosynthesis of amino acids
TraesCS7D02G381000	-2.3944	1.02718e-10	2.16485e-09	down	K14488 SAUR family protein | (RefSeq) auxin-responsive protein SAUR32-like (A)	ko04075: Plant hormone signal transduction
TraesCS7D02G377100	1.0858	0.00104535	0.00464611	up	K12834 PHD finger-like domain-containing protein 5A | (RefSeq) PHD finger-like domain-containing protein 5A isoform X1 (A)	ko03040: Spliceosome
TraesCS7D02G377000	1.70066	6.18001e-10	1.1498e-08	up	K12194 charged multivesicular body protein 4A/B | (RefSeq) vacuolar protein sorting-associated protein 32 homolog 2-like (A)	ko03250: Viral life cycle - HIV-1; ko04144: Endocytosis
TraesCS7D02G373800	1.35668	0.000904817	0.00411518	up	K14515 EIN3-binding F-box protein | (RefSeq) EIN3-binding F-box protein 1-like (A)	ko04016: MAPK signaling pathway - plant; ko04075: Plant hormone signal transduction
TraesCS7D02G373100	1.00574	9.2968e-05	0.000567808	up	K03146 cysteine-dependent adenosine diphosphate thiazole synthase [EC:2.4.2.60] | (RefSeq) thiamine thiazole synthase 2, chloroplastic-like (A)	ko00730: Thiamine metabolism; ko01100: Metabolic pathways; ko01240: Biosynthesis of cofactors
TraesCS7D02G365000	1.81299	1.16252e-07	1.41777e-06	up	K00679 phospholipid:diacylglycerol acyltransferase [EC:2.3.1.158] | (RefSeq) hypothetical protein (A)	ko00561: Glycerolipid metabolism; ko01100: Metabolic pathways
TraesCS7D02G364900	2.35714	1.84678e-06	1.74715e-05	up	K00469 inositol oxygenase [EC:1.13.99.1] | (RefSeq) probable inositol oxygenase (A)	ko00053: Ascorbate and aldarate metabolism; ko00562: Inositol phosphate metabolism; ko01100: Metabolic pathways; ko01250: Biosynthesis of nucleotide sugars
TraesCS7D02G363700	2.1495	3.77205e-05	0.000257112	up	K22374 3''-deamino-3''-oxonicotianamine reductase [EC:1.1.1.285] | (RefSeq) probable NAD(P)H-dependent oxidoreductase 1 (A)	ko00999: Biosynthesis of various plant secondary metabolites; ko01100: Metabolic pathways; ko01110: Biosynthesis of secondary metabolites
TraesCS7D02G361200	7.63945	1.22058e-08	1.80007e-07	up	K00423 L-ascorbate oxidase [EC:1.10.3.3] | (RefSeq) L-ascorbate oxidase-like (A)	ko00053: Ascorbate and aldarate metabolism; ko01100: Metabolic pathways
TraesCS7D02G354900	-3.86047	1.70767e-13	5.42098e-12	down	K13435 serine/threonine-protein kinase Pto | (RefSeq) receptor-like protein kinase HERK 1 isoform X2 (A)	ko04626: Plant-pathogen interaction
TraesCS7D02G350500	1.24843	0.0160973	0.0455361	up	K15397 3-ketoacyl-CoA synthase [EC:2.3.1.199] | (RefSeq) 3-ketoacyl-CoA synthase 11-like (A)	ko00062: Fatty acid elongation; ko01100: Metabolic pathways; ko01110: Biosynthesis of secondary metabolites; ko04626: Plant-pathogen interaction
TraesCS7D02G344800	-2.28697	0.000415436	0.00210792	down	K07178 RIO kinase 1 [EC:2.7.11.1] | (RefSeq) serine/threonine-protein kinase RIO1-like (A)	ko03008: Ribosome biogenesis in eukaryotes
TraesCS7D02G336600	-1.72339	0.000452805	0.00227034	down	K03116 sec-independent protein translocase protein TatA | (RefSeq) sec-independent protein translocase protein TATA, chloroplastic (A)	ko03060: Protein export
TraesCS7D02G335800	-1.33406	1.69519e-05	0.000126695	down	K06689 ubiquitin-conjugating enzyme E2 D [EC:2.3.2.23] | (RefSeq) ubiquitin-conjugating enzyme E2 28 (A)	ko04120: Ubiquitin mediated proteolysis; ko04141: Protein processing in endoplasmic reticulum
TraesCS7D02G325300	2.229	0.00174119	0.00715553	up	K13667 EGF-domain serine glucosyl/xylosyltransferase [EC:2.4.1.376 2.4.2.63] | (RefSeq) O-glucosyltransferase rumi (A)	ko00514: Other types of O-glycan biosynthesis
TraesCS7D02G324900	1.46786	9.82312e-05	0.000596276	up	K14500 BR-signaling kinase [EC:2.7.11.1] | (RefSeq) probable serine/threonine-protein kinase At5g41260 (A)	ko04075: Plant hormone signal transduction
TraesCS7D02G324800	1.0552	0.000116437	0.000690947	up	K08515 vesicle-associated membrane protein 7 | (RefSeq) vesicle-associated membrane protein 714 (A)	ko04130: SNARE interactions in vesicular transport
TraesCS7D02G320700	-1.4373	0.00879483	0.0277789	down	K14570 RNA exonuclease [EC:3.1.-.-] | (RefSeq) small RNA degrading nuclease 3-like (A)	ko03008: Ribosome biogenesis in eukaryotes
TraesCS7D02G319100	-1.1256	9.18458e-06	7.37552e-05	down	K00121 S-(hydroxymethyl)glutathione dehydrogenase / alcohol dehydrogenase [EC:1.1.1.284 1.1.1.1] | (RefSeq) alcohol dehydrogenase class III (A)	ko00010: Glycolysis / Gluconeogenesis; ko00071: Fatty acid degradation; ko00350: Tyrosine metabolism; ko00620: Pyruvate metabolism; ko01100: Metabolic pathways; ko01110: Biosynthesis of secondary metabolites; ko01200: Carbon metabolism
TraesCS7D02G318300	1.29101	6.34382e-07	6.66269e-06	up	K13544 pheophorbidase [EC:3.1.1.82] | (RefSeq) probable pheophorbidase (A)	ko00860: Porphyrin metabolism; ko01110: Biosynthesis of secondary metabolites
TraesCS7D02G316500	1.4461	0.00306883	0.0115681	up	K10839 UV excision repair protein RAD23 | (RefSeq) ubiquitin receptor RAD23b-like isoform X1 (A)	ko03420: Nucleotide excision repair; ko04141: Protein processing in endoplasmic reticulum
TraesCS7D02G315300	-2.29413	2.49499e-07	2.86572e-06	down	K09561 STIP1 homology and U-box containing protein 1 [EC:2.3.2.27] | (RefSeq) E3 ubiquitin-protein ligase CHIP-like (A)	ko04120: Ubiquitin mediated proteolysis; ko04141: Protein processing in endoplasmic reticulum
TraesCS7D02G313100	-1.10755	3.12536e-07	3.52171e-06	down	K13448 calcium-binding protein CML | (RefSeq) probable calcium-binding protein CML7 (A)	ko04626: Plant-pathogen interaction
TraesCS7D02G305500	-1.49234	0.00359523	0.0132353	down	K19891 glucan endo-1,3-beta-glucosidase 1/2/3 [EC:3.2.1.39] | (RefSeq) glucan endo-1,3-beta-glucosidase 1 (A)	ko00500: Starch and sucrose metabolism; ko01100: Metabolic pathways
TraesCS7D02G298900	-1.40286	0.000550774	0.00269049	down	K04718 sphingosine kinase [EC:2.7.1.91] | (RefSeq) sphingosine kinase 1 isoform X1 (A)	ko00600: Sphingolipid metabolism; ko01100: Metabolic pathways
TraesCS7D02G298200	-1.14648	0.00263228	0.010158	down	K03141 transcription initiation factor TFIIH subunit 1 | (RefSeq) general transcription and DNA repair factor IIH subunit TFB1-1-like isoform X1 (A)	ko03022: Basal transcription factors; ko03420: Nucleotide excision repair
TraesCS7D02G297700	2.63004	1.64355e-05	0.000123318	up	K00423 L-ascorbate oxidase [EC:1.10.3.3] | (RefSeq) L-ascorbate oxidase homolog (A)	ko00053: Ascorbate and aldarate metabolism; ko01100: Metabolic pathways
TraesCS7D02G295400	-1.93797	7.26573e-11	1.57091e-09	down	K12133 MYB-related transcription factor LHY | (RefSeq) protein LHY (A)	ko04712: Circadian rhythm - plant
TraesCS7D02G294500	-1.42665	0.000149457	0.000860914	down	K12811 ATP-dependent RNA helicase DDX46/PRP5 [EC:3.6.4.13] | (RefSeq) DEAD-box ATP-dependent RNA helicase 42-like (A)	ko03040: Spliceosome
TraesCS7D02G288800	1.115	2.52785e-06	2.31599e-05	up	K00753 glycoprotein 3-alpha-L-fucosyltransferase [EC:2.4.1.214] | (RefSeq) putative fucosyltransferase-like protein (A)	ko00513: Various types of N-glycan biosynthesis; ko01100: Metabolic pathways
TraesCS7D02G286800	1.91262	9.97717e-07	1.00467e-05	up	K22911 thiamine phosphate phosphatase / amino-HMP aminohydrolase [EC:3.1.3.100 3.5.99.-] | (RefSeq) bifunctional TH2 protein, mitochondrial (A)	ko00730: Thiamine metabolism; ko01100: Metabolic pathways; ko01240: Biosynthesis of cofactors
TraesCS7D02G281400	-1.08634	0.00071234	0.00335237	down	K01805 xylose isomerase [EC:5.3.1.5] | (RefSeq) xylose isomerase (A)	ko00040: Pentose and glucuronate interconversions; ko00051: Fructose and mannose metabolism; ko01100: Metabolic pathways
TraesCS7D02G280900	1.06637	0.000165055	0.000938934	up	K01510 apyrase [EC:3.6.1.5] | (RefSeq) probable apyrase 6 isoform X1 (A)	ko00230: Purine metabolism; ko00240: Pyrimidine metabolism; ko01100: Metabolic pathways; ko01110: Biosynthesis of secondary metabolites; ko01232: Nucleotide metabolism
TraesCS7D02G278500	-1.23737	0.000615727	0.00295994	down	K02865 large subunit ribosomal protein L10Ae | (RefSeq) 60S ribosomal protein L10a-like (A)	ko03010: Ribosome
TraesCS7D02G277200	-1.09329	8.34284e-05	0.000516862	down	K03938 NADH dehydrogenase (ubiquinone) Fe-S protein 5 | (RefSeq) NADH dehydrogenase [ubiquinone] iron-sulfur protein 5-B-like (A)	ko00190: Oxidative phosphorylation; ko01100: Metabolic pathways
TraesCS7D02G276300	-2.98027	6.34386e-06	5.30872e-05	down	K08912 light-harvesting complex II chlorophyll a/b binding protein 1 | (RefSeq) chlorophyll a-b binding protein of LHCII type 1-like (A)	ko00196: Photosynthesis - antenna proteins; ko01100: Metabolic pathways
TraesCS7D02G272600	2.95806	0.000466939	0.00233121	up	K12309 beta-galactosidase [EC:3.2.1.23] | (RefSeq) beta-galactosidase 2 (A)	ko00052: Galactose metabolism; ko00511: Other glycan degradation; ko00531: Glycosaminoglycan degradation; ko00600: Sphingolipid metabolism; ko00604: Glycosphingolipid biosynthesis - ganglio series; ko01100: Metabolic pathways
TraesCS7D02G270900	-1.47717	0.00188784	0.00766981	down	K01057 6-phosphogluconolactonase [EC:3.1.1.31] | (RefSeq) probable 6-phosphogluconolactonase 3, chloroplastic (A)	ko00030: Pentose phosphate pathway; ko01100: Metabolic pathways; ko01110: Biosynthesis of secondary metabolites; ko01200: Carbon metabolism
TraesCS7D02G269800	-1.18483	4.82636e-05	0.000319429	down	K00008 L-iditol 2-dehydrogenase [EC:1.1.1.14] | (RefSeq) sorbitol dehydrogenase (A)	ko00040: Pentose and glucuronate interconversions; ko00051: Fructose and mannose metabolism; ko01100: Metabolic pathways
TraesCS7D02G269700	1.54235	0.0163691	0.0461685	up	K15631 molybdenum cofactor sulfurtransferase [EC:2.8.1.9] | (RefSeq) molybdenum cofactor sulfurase-like (A)	ko00790: Folate biosynthesis; ko01100: Metabolic pathways
TraesCS7D02G269400	-1.4891	0.00165326	0.00684784	down	K08711 ATP-binding cassette, subfamily G (WHITE), member 2, PDR | (RefSeq) ZEB2-regulated ABC transporter 1-like (A)	ko02010: ABC transporters
TraesCS7D02G267700	-4.40216	1.11× 10-22	9.50× 10-21	down	K13412 calcium-dependent protein kinase [EC:2.7.11.1] | (RefSeq) calcium-dependent protein kinase 21-like (A)	ko04626: Plant-pathogen interaction
TraesCS7D02G267300	-2.60548	0.00108823	0.00480711	down	K13436 pto-interacting protein 1 [EC:2.7.11.1] | (RefSeq) PTI1-like tyrosine-protein kinase 3 (A)	ko04626: Plant-pathogen interaction
TraesCS7D02G261800	-1.13564	3.91105e-05	0.00026535	down	K01845 glutamate-1-semialdehyde 2,1-aminomutase [EC:5.4.3.8] | (RefSeq) glutamate-1-semialdehyde 2,1-aminomutase, chloroplastic (A)	ko00860: Porphyrin metabolism; ko01100: Metabolic pathways; ko01110: Biosynthesis of secondary metabolites; ko01240: Biosynthesis of cofactors
TraesCS7D02G257800	-3.86852	1.15322e-08	1.70923e-07	down	K08679 UDP-glucuronate 4-epimerase [EC:5.1.3.6] | (RefSeq) UDP-glucuronate 4-epimerase 6-like (A)	ko00053: Ascorbate and aldarate metabolism; ko00520: Amino sugar and nucleotide sugar metabolism; ko01100: Metabolic pathways; ko01240: Biosynthesis of cofactors; ko01250: Biosynthesis of nucleotide sugars
TraesCS7D02G253900	1.38893	0.0079135	0.0254965	up	K01099 inositol polyphosphate 5-phosphatase INPP5B/F [EC:3.1.3.36] | (RefSeq) type II inositol polyphosphate 5-phosphatase 15-like (A)	ko00562: Inositol phosphate metabolism; ko01100: Metabolic pathways; ko04070: Phosphatidylinositol signaling system
TraesCS7D02G253800	-1.39321	0.00639927	0.0214257	down	K12272 signal recognition particle receptor subunit beta | (RefSeq) signal recognition particle receptor subunit beta-like (A)	ko03060: Protein export
TraesCS7D02G250100	-1.52887	2.06975e-05	0.000151018	down	K14486 auxin response factor | (RefSeq) auxin response factor 7-like (A)	ko04075: Plant hormone signal transduction
TraesCS7D02G249100	-1.80903	1.18653e-07	1.44474e-06	down	K20547 basic endochitinase B [EC:3.2.1.14] | (RefSeq) endochitinase 1-like (A)	ko00520: Amino sugar and nucleotide sugar metabolism; ko01100: Metabolic pathways; ko04016: MAPK signaling pathway - plant
TraesCS7D02G248800	3.03833	7.66351e-06	6.27367e-05	up	K13082 bifunctional dihydroflavonol 4-reductase/flavanone 4-reductase [EC:1.1.1.219 1.1.1.234] | (RefSeq) dihydroflavonol 4-reductase-like (A)	ko00941: Flavonoid biosynthesis; ko01100: Metabolic pathways; ko01110: Biosynthesis of secondary metabolites
TraesCS7D02G248200	1.72953	0.00227937	0.00899342	up	K01176 alpha-amylase [EC:3.2.1.1] | (RefSeq) alpha-amylase isozyme 2A (A)	ko00500: Starch and sucrose metabolism; ko01100: Metabolic pathways; ko01110: Biosynthesis of secondary metabolites
TraesCS7D02G244600	-2.19369	5.9165e-10	1.10616e-08	down	K14514 ethylene-insensitive protein 3 | (RefSeq) ETHYLENE INSENSITIVE 3-like 3 protein (A)	ko04016: MAPK signaling pathway - plant; ko04075: Plant hormone signal transduction
TraesCS7D02G243800	1.05722	1.89665e-05	0.000140107	up	K14396 polyadenylate-binding protein 2 | (RefSeq) RNA-binding protein (A)	ko03015: mRNA surveillance pathway
TraesCS7D02G242500	1.92044	2.94169e-08	4.06276e-07	up	K01126 glycerophosphoryl diester phosphodiesterase [EC:3.1.4.46] | (RefSeq) glycerophosphodiester phosphodiesterase GDPD6 isoform X1 (A)	ko00564: Glycerophospholipid metabolism
TraesCS7D02G242200	-4.0231	9.11019e-06	7.31907e-05	down	K02872 large subunit ribosomal protein L13Ae | (RefSeq) 60S ribosomal protein L13a-4-like (A)	ko03010: Ribosome
TraesCS7D02G241500	2.16131	3.06535e-05	0.000213775	up	K05391 cyclic nucleotide gated channel, plant | (RefSeq) cyclic nucleotide-gated ion channel 1-like isoform X1 (A)	ko04626: Plant-pathogen interaction
TraesCS7D02G241100	-2.12707	1.7045e-17	8.54485e-16	down	K04079 molecular chaperone HtpG | (RefSeq) heat shock protein 81-1 (A)	ko04141: Protein processing in endoplasmic reticulum; ko04626: Plant-pathogen interaction
TraesCS7D02G239800	-1.00618	0.000302465	0.00159555	down	K18835 WRKY transcription factor 2 | (RefSeq) probable WRKY transcription factor 2 (A)	ko04626: Plant-pathogen interaction
TraesCS7D02G236700	2.00717	0.00771863	0.0249858	up	K06617 raffinose synthase [EC:2.4.1.82] | (RefSeq) probable galactinol--sucrose galactosyltransferase 1 (A)	ko00052: Galactose metabolism; ko01100: Metabolic pathways
TraesCS7D02G235600	-1.99037	2.83672e-06	2.56788e-05	down	K15639 PHYB activation tagged suppressor 1 [EC:1.14.-.-] | (RefSeq) cytochrome P450 734A1-like (A)	ko00905: Brassinosteroid biosynthesis; ko01110: Biosynthesis of secondary metabolites
TraesCS7D02G233100	-1.51922	2.94944e-07	3.34532e-06	down	K19011 achilleol B synthase [EC:5.4.99.48] | (RefSeq) achilleol B synthase-like isoform X1 (A)	ko00909: Sesquiterpenoid and triterpenoid biosynthesis
TraesCS7D02G232800	1.32191	2.92083e-09	4.85504e-08	up	K17212 bisdemethoxycurcumin synthase [EC:2.3.1.211] | (RefSeq) bisdemethoxycurcumin synthase (A)	ko00945: Stilbenoid, diarylheptanoid and gingerol biosynthesis; ko01110: Biosynthesis of secondary metabolites
TraesCS7D02G225100	1.92013	0.00126355	0.00544753	up	K00232 acyl-CoA oxidase [EC:1.3.3.6] | (RefSeq) acyl-coenzyme A oxidase 2, peroxisomal-like isoform X1 (A)	ko00071: Fatty acid degradation; ko00410: beta-Alanine metabolism; ko00592: alpha-Linolenic acid metabolism; ko00640: Propanoate metabolism; ko01040: Biosynthesis of unsaturated fatty acids; ko01100: Metabolic pathways; ko01110: Biosynthesis of secondary metabolites; ko01200: Carbon metabolism; ko01212: Fatty acid metabolism; ko04146: Peroxisome
TraesCS7D02G224200	-2.4007	1.09883e-10	2.30767e-09	down	K08726 soluble epoxide hydrolase / lipid-phosphate phosphatase [EC:3.3.2.10 3.1.3.76] | (RefSeq) uncharacterized protein LOC112528667 (A)	ko00590: Arachidonic acid metabolism; ko01100: Metabolic pathways; ko04146: Peroxisome
TraesCS7D02G223000	-2.29263	1.92128e-05	0.00014177	down	K01681 aconitate hydratase [EC:4.2.1.3] | (RefSeq) putative aconitate hydratase, cytoplasmic (A)	ko00020: Citrate cycle (TCA cycle); ko00630: Glyoxylate and dicarboxylate metabolism; ko01100: Metabolic pathways; ko01110: Biosynthesis of secondary metabolites; ko01200: Carbon metabolism; ko01210: 2-Oxocarboxylic acid metabolism; ko01230: Biosynthesis of amino acids
TraesCS7D02G222900	-1.63719	0.00336367	0.0125059	down	K01148 poly(A)-specific ribonuclease [EC:3.1.13.4] | (RefSeq) uncharacterized CRM domain-containing protein At3g25440, chloroplastic-like (A)	ko03018: RNA degradation
TraesCS7D02G220200	1.05844	0.0171603	0.0479624	up	K01613 phosphatidylserine decarboxylase [EC:4.1.1.65] | (RefSeq) phosphatidylserine decarboxylase proenzyme 3-like (A)	ko00564: Glycerophospholipid metabolism; ko01100: Metabolic pathways; ko01110: Biosynthesis of secondary metabolites
TraesCS7D02G215000	1.71996	0.000534709	0.00262135	up	K14544 U3 small nucleolar RNA-associated protein 22 | (RefSeq) hypothetical protein (A)	ko03008: Ribosome biogenesis in eukaryotes
TraesCS7D02G214900	3.64745	1.85302e-09	3.16873e-08	up	K16224 senescence-induced receptor-like serine/threonine-protein kinase | (RefSeq) senescence-induced receptor-like serine/threonine-protein kinase (A)	ko04016: MAPK signaling pathway - plant; ko04626: Plant-pathogen interaction
TraesCS7D02G213500	-1.42535	0.00874085	0.027641	down	K18878 BHLH transcription factor Upa20 | (RefSeq) transcription factor bHLH137-like (A)	ko04626: Plant-pathogen interaction
TraesCS7D02G210700	1.30685	0.000828813	0.00382421	up	K17906 autophagy-related protein 2 | (RefSeq) autophagy-related protein 2-like (A)	ko04136: Autophagy - other
TraesCS7D02G206200	-1.50666	6.58646e-17	3.14282e-15	down	K17991 peroxygenase [EC:1.11.2.3] | (RefSeq) probable peroxygenase 5 (A)	ko00073: Cutin, suberine and wax biosynthesis
TraesCS7D02G204900	5.1525	9.88834e-06	7.87499e-05	up	K13029 4-hydroxyphenylacetaldehyde oxime monooxygenase [EC:1.14.14.37] | (RefSeq) 4-hydroxyphenylacetaldehyde oxime monooxygenase-like (A)	ko00460: Cyanoamino acid metabolism; ko01100: Metabolic pathways; ko01110: Biosynthesis of secondary metabolites
TraesCS7D02G204300	-3.07046	0.00115244	0.00504491	down	K13464 jasmonate ZIM domain-containing protein | (RefSeq) protein TIFY 11e-like (A)	ko04075: Plant hormone signal transduction
TraesCS7D02G204200	-2.57593	0.0048523	0.016994	down	K13464 jasmonate ZIM domain-containing protein | (RefSeq) protein TIFY 11e-like (A)	ko04075: Plant hormone signal transduction
TraesCS7D02G201000	-7.1879	1.12689e-09	1.9966e-08	down	K01179 endoglucanase [EC:3.2.1.4] | (RefSeq) endoglucanase 2 (A)	ko00500: Starch and sucrose metabolism; ko01100: Metabolic pathways
TraesCS7D02G191700	-2.59389	0.00293315	0.0111382	down	K21888 glutathione dehydrogenase/transferase [EC:1.8.5.1 2.5.1.18] | (RefSeq) probable glutathione S-transferase DHAR2, chloroplastic (A)	ko00053: Ascorbate and aldarate metabolism; ko00480: Glutathione metabolism; ko01100: Metabolic pathways
TraesCS7D02G190100	1.4489	0.00702921	0.0231512	up	K00703 starch synthase [EC:2.4.1.21] | (RefSeq) soluble starch synthase 2-3, chloroplastic/amyloplastic (A)	ko00500: Starch and sucrose metabolism; ko01100: Metabolic pathways; ko01110: Biosynthesis of secondary metabolites
TraesCS7D02G189700	-1.05914	0.0111639	0.0337911	down	K14413 beta-1,3-galactosyltransferase [EC:2.4.1.-] | (RefSeq) beta-1,3-galactosyltransferase GALT1 (A)	ko00513: Various types of N-glycan biosynthesis; ko01100: Metabolic pathways
TraesCS7D02G188400	1.20272	0.000894557	0.00407649	up	K00799 glutathione S-transferase [EC:2.5.1.18] | (RefSeq) glutathione S-transferase U10 (A)	ko00480: Glutathione metabolism; ko01100: Metabolic pathways
TraesCS7D02G188300	-1.26814	0.00168923	0.00697143	down	K13648 alpha-1,4-galacturonosyltransferase [EC:2.4.1.43] | (RefSeq) probable galacturonosyltransferase 9 (A)	ko00520: Amino sugar and nucleotide sugar metabolism; ko01100: Metabolic pathways
TraesCS7D02G185600	-4.8449	7.99 × 10-33	1.44 × 10-30	down	K13993 HSP20 family protein | (RefSeq) 17.4 kDa class I heat shock protein-like (A)	ko04141: Protein processing in endoplasmic reticulum
TraesCS7D02G185500	-2.73569	3.66 × 10-35	8.38 × 10-33	down	K13993 HSP20 family protein | (RefSeq) 17.4 kDa class I heat shock protein-like (A)	ko04141: Protein processing in endoplasmic reticulum
TraesCS7D02G180700	4.04467	2.29936e-17	1.13672e-15	up	K23452 UDP-glucosyltransferase 85A [EC:2.4.1.-] | (RefSeq) UGT85A7; UDP-glucosyl transferase 85A7 (A)	ko00908: Zeatin biosynthesis; ko01110: Biosynthesis of secondary metabolites
TraesCS7D02G180600	-2.29757	0.000282891	0.00150365	down	K00020 3-hydroxyisobutyrate dehydrogenase [EC:1.1.1.31] | (GenBank) 6-phosphogluconate dehydrogenase-like protein (A)	ko00280: Valine, leucine and isoleucine degradation; ko01100: Metabolic pathways
TraesCS7D02G179700	1.23543	4.10141e-08	5.47503e-07	up	K14396 polyadenylate-binding protein 2 | (RefSeq) polyadenylate-binding protein 2-like (A)	ko03015: mRNA surveillance pathway
TraesCS7D02G179600	-1.90683	1.03375e-08	1.54755e-07	down	K13993 HSP20 family protein | (RefSeq) 26.2 kDa heat shock protein, mitochondrial-like (A)	ko04141: Protein processing in endoplasmic reticulum
TraesCS7D02G179000	-4.12549	3.64747e-12	9.62584e-11	down	K13993 HSP20 family protein | (RefSeq) 26.2 kDa heat shock protein, mitochondrial-like (A)	ko04141: Protein processing in endoplasmic reticulum
TraesCS7D02G174100	2.3197	0.00948131	0.0295184	up	K14494 DELLA protein | (RefSeq) LOW QUALITY PROTEIN: DELLA protein GAI-like (A)	ko04075: Plant hormone signal transduction
TraesCS7D02G173800	-1.01767	0.00461499	0.0162941	down	K17872 demethylphylloquinone reductase [EC:1.6.5.12] | (RefSeq) alternative NAD(P)H-ubiquinone oxidoreductase C1, chloroplastic/mitochondrial-like isoform X1 (A)	ko00130: Ubiquinone and other terpenoid-quinone biosynthesis; ko01100: Metabolic pathways; ko01110: Biosynthesis of secondary metabolites; ko01240: Biosynthesis of cofactors
TraesCS7D02G173600	-2.4301	9.68481e-05	0.000588749	down	K19011 achilleol B synthase [EC:5.4.99.48] | (RefSeq) achilleol B synthase-like isoform X1 (A)	ko00909: Sesquiterpenoid and triterpenoid biosynthesis
TraesCS7D02G171300	-2.11698	2.95178e-10	5.79841e-09	down	K14432 ABA responsive element binding factor | (RefSeq) bZIP transcription factor 46-like (A)	ko04075: Plant hormone signal transduction
TraesCS7D02G171200	2.90518	6.92149e-06	5.74135e-05	up	K13496 UDP-glucosyltransferase 73C [EC:2.4.1.-] | (RefSeq) UDP-glycosyltransferase 73C6-like (A)	ko00908: Zeatin biosynthesis; ko01110: Biosynthesis of secondary metabolites
TraesCS7D02G170500	1.12084	4.30111e-05	0.000288376	up	K14677 aminoacylase [EC:3.5.1.14] | (RefSeq) aminoacylase-1-like (A)	ko00220: Arginine biosynthesis; ko01100: Metabolic pathways; ko01110: Biosynthesis of secondary metabolites; ko01210: 2-Oxocarboxylic acid metabolism; ko01230: Biosynthesis of amino acids
TraesCS7D02G168300	-2.48878	1.19871e-05	9.33863e-05	down	K11866 STAM-binding protein [EC:3.4.19.12] | (RefSeq) AMSH-like ubiquitin thioesterase 3 (A)	ko04144: Endocytosis
TraesCS7D02G160700	-1.39004	9.48774e-07	9.60374e-06	down	K06943 nucleolar GTP-binding protein | (RefSeq) nucleolar GTP-binding protein 1-like (A)	ko03008: Ribosome biogenesis in eukaryotes
TraesCS7D02G160200	1.46385	2.34411e-05	0.000168893	up	K12669 oligosaccharyltransferase complex subunit gamma | (RefSeq) probable dolichyl-diphosphooligosaccharide--protein glycosyltransferase subunit 3 (A)	ko00510: N-Glycan biosynthesis; ko00513: Various types of N-glycan biosynthesis; ko01100: Metabolic pathways; ko04141: Protein processing in endoplasmic reticulum
TraesCS7D02G160100	-1.15766	0.000112551	0.000670743	down	K18054 2'-deoxymugineic-acid 2'-dioxygenase / mugineic-acid 3-dioxygenase [EC:1.14.11.24 1.14.11.25] | (RefSeq) 2'-deoxymugineic-acid 2'-dioxygenase-like (A)	ko00999: Biosynthesis of various plant secondary metabolites; ko01100: Metabolic pathways; ko01110: Biosynthesis of secondary metabolites
TraesCS7D02G159900	1.34139	3.77681e-07	4.16625e-06	up	K22913 phosphatidylinositol 3,5-bisphosphate 5-phosphatase [EC:3.1.3.-] | (RefSeq) phosphoinositide phosphatase SAC3-like (A)	ko00562: Inositol phosphate metabolism; ko01100: Metabolic pathways
TraesCS7D02G157800	-2.6012	0.0119677	0.0357886	down	K01051 pectinesterase [EC:3.1.1.11] | (RefSeq) probable pectinesterase/pectinesterase inhibitor 12 (A)	ko00040: Pentose and glucuronate interconversions; ko01100: Metabolic pathways
TraesCS7D02G155700	-1.4725	0.0122847	0.036563	down	K12930 anthocyanidin 3-O-glucosyltransferase [EC:2.4.1.115] | (RefSeq) anthocyanidin 3-O-glucosyltransferase (A)	ko00942: Anthocyanin biosynthesis; ko01100: Metabolic pathways; ko01110: Biosynthesis of secondary metabolites
TraesCS7D02G154100	3.28926	3.03053e-05	0.000211816	up	K08679 UDP-glucuronate 4-epimerase [EC:5.1.3.6] | (RefSeq) UDP-glucuronate 4-epimerase 1-like (A)	ko00053: Ascorbate and aldarate metabolism; ko00520: Amino sugar and nucleotide sugar metabolism; ko01100: Metabolic pathways; ko01240: Biosynthesis of cofactors; ko01250: Biosynthesis of nucleotide sugars
TraesCS7D02G154000	5.38694	1.04385e-08	1.56009e-07	up	K22845 phlorizin synthase [EC:2.4.1.357] | (RefSeq) UDP-glycosyltransferase 88F4-like (A)	ko00941: Flavonoid biosynthesis; ko01110: Biosynthesis of secondary metabolites
TraesCS7D02G151600	-6.74534	6.60 × 10-30	9.95 × 10-28	down	K00059 3-oxoacyl-[acyl-carrier protein] reductase [EC:1.1.1.100] | (RefSeq) NADPH-dependent aldehyde reductase-like protein, chloroplastic (A)	ko00061: Fatty acid biosynthesis; ko00780: Biotin metabolism; ko01100: Metabolic pathways; ko01110: Biosynthesis of secondary metabolites; ko01212: Fatty acid metabolism; ko01240: Biosynthesis of cofactors
TraesCS7D02G143600	3.26894	0.000467899	0.00233491	up	K09487 heat shock protein 90kDa beta | (RefSeq) endoplasmin homolog isoform X1 (A)	ko04141: Protein processing in endoplasmic reticulum; ko04626: Plant-pathogen interaction
TraesCS7D02G142700	-1.17549	0.00920266	0.0288287	down	K07964 heparanase [EC:3.2.1.166] | (RefSeq) heparanase-like protein 3 (A)	ko00531: Glycosaminoglycan degradation; ko01100: Metabolic pathways
TraesCS7D02G142300	1.47736	0.00246554	0.00962639	up	K14975 codeine 3-O-demethylase [EC:1.14.11.32] | (RefSeq) codeine O-demethylase (A)	ko00950: Isoquinoline alkaloid biosynthesis; ko01100: Metabolic pathways; ko01110: Biosynthesis of secondary metabolites
TraesCS7D02G133500	2.41917	1.37136e-07	1.65212e-06	up	K06617 raffinose synthase [EC:2.4.1.82] | (RefSeq) probable galactinol--sucrose galactosyltransferase 6 (A)	ko00052: Galactose metabolism; ko01100: Metabolic pathways
TraesCS7D02G132700	-4.54503	4.1241e-12	1.07783e-10	down	K02183 calmodulin | (RefSeq) calmodulin-like protein 7 (A)	ko04016: MAPK signaling pathway - plant; ko04070: Phosphatidylinositol signaling system; ko04626: Plant-pathogen interaction
TraesCS7D02G127400	1.39552	0.00600463	0.0202994	up	K11430 [histone H3]-lysine27 N-trimethyltransferase EZH2 [EC:2.1.1.356] | (RefSeq) histone-lysine N-methyltransferase CLF-like isoform X1 (A)	ko00310: Lysine degradation; ko01100: Metabolic pathways
TraesCS7D02G125400	1.87174	0.0041377	0.0148681	up	K05917 sterol 14alpha-demethylase [EC:1.14.14.154 1.14.15.36] | (RefSeq) obtusifoliol 14-alpha demethylase-like (A)	ko00100: Steroid biosynthesis; ko01100: Metabolic pathways; ko01110: Biosynthesis of secondary metabolites
TraesCS7D02G123400	-2.54338	0.00842518	0.0268356	down	K07964 heparanase [EC:3.2.1.166] | (RefSeq) heparanase-like protein 3 (A)	ko00531: Glycosaminoglycan degradation; ko01100: Metabolic pathways
TraesCS7D02G122600	-1.82463	0.00036326	0.00187683	down	K02492 glutamyl-tRNA reductase [EC:1.2.1.70] | (RefSeq) glutamyl-tRNA reductase 3, chloroplastic-like (A)	ko00860: Porphyrin metabolism; ko01100: Metabolic pathways; ko01110: Biosynthesis of secondary metabolites; ko01240: Biosynthesis of cofactors
TraesCS7D02G113200	1.39068	3.04216e-05	0.000212462	up	K14566 U3 small nucleolar RNA-associated protein 24 | (RefSeq) rRNA-processing protein FCF1 homolog (A)	ko03008: Ribosome biogenesis in eukaryotes
TraesCS7D02G111800	-5.17962	4.95221e-18	2.65958e-16	down	K01206 alpha-L-fucosidase [EC:3.2.1.51] | (RefSeq) alpha-L-fucosidase 3-like (A)	ko00511: Other glycan degradation
TraesCS7D02G110500	1.24801	3.51146e-06	3.11077e-05	up	K12592 exosome complex protein LRP1 | (RefSeq) uncharacterized protein LOC123164912 (A)	ko03018: RNA degradation
TraesCS7D02G107500	1.28616	2.39069e-05	0.000171673	up	K06689 ubiquitin-conjugating enzyme E2 D [EC:2.3.2.23] | (RefSeq) ubiquitin-conjugating enzyme E2 E2-like (A)	ko04120: Ubiquitin mediated proteolysis; ko04141: Protein processing in endoplasmic reticulum
TraesCS7D02G106400	1.01569	1.51955e-05	0.000115276	up	K14512 mitogen-activated protein kinase 6 [EC:2.7.11.24] | (RefSeq) mitogen-activated protein kinase 1 (A)	ko04016: MAPK signaling pathway - plant; ko04075: Plant hormone signal transduction; ko04626: Plant-pathogen interaction
TraesCS7D02G096700	1.44678	0.000137707	0.000801518	up	K01738 cysteine synthase [EC:2.5.1.47] | (RefSeq) cysteine synthase-like (A)	ko00270: Cysteine and methionine metabolism; ko00920: Sulfur metabolism; ko01100: Metabolic pathways; ko01110: Biosynthesis of secondary metabolites; ko01200: Carbon metabolism; ko01230: Biosynthesis of amino acids
TraesCS7D02G093200	-2.45574	0.000718522	0.00337849	down	K00679 phospholipid:diacylglycerol acyltransferase [EC:2.3.1.158] | (RefSeq) hypothetical protein (A)	ko00561: Glycerolipid metabolism; ko01100: Metabolic pathways
TraesCS7D02G092900	1.01912	0.00578446	0.0196501	up	K20603 mitogen-activated protein kinase kinase 2 [EC:2.7.12.2] | (RefSeq) mitogen-activated protein kinase kinase 2-like (A)	ko04016: MAPK signaling pathway - plant
TraesCS7D02G088400	-2.52601	0.00620796	0.0208871	down	K10251 17beta-estradiol 17-dehydrogenase / very-long-chain 3-oxoacyl-CoA reductase [EC:1.1.1.62 1.1.1.330] | (RefSeq) very-long-chain 3-oxoacyl-CoA reductase 1-like (A)	ko00062: Fatty acid elongation; ko01040: Biosynthesis of unsaturated fatty acids; ko01100: Metabolic pathways; ko01110: Biosynthesis of secondary metabolites; ko01212: Fatty acid metabolism
TraesCS7D02G087000	1.28625	0.000322806	0.001692	up	K05391 cyclic nucleotide gated channel, plant | (RefSeq) cyclic nucleotide-gated ion channel 1-like (A)	ko04626: Plant-pathogen interaction
TraesCS7D02G084400	-1.06371	1.59718e-06	1.53574e-05	down	K10781 fatty acyl-ACP thioesterase B [EC:3.1.2.14 3.1.2.21] | (RefSeq) palmitoyl-acyl carrier protein thioesterase, chloroplastic-like (A)	ko00061: Fatty acid biosynthesis; ko01100: Metabolic pathways; ko01212: Fatty acid metabolism
TraesCS7D02G079800	-2.0691	0.000974285	0.00438048	down	K22588 acetylserotonin O-methyltransferase, plant [EC:2.1.1.4] | (RefSeq) trans-resveratrol di-O-methyltransferase-like (A)	ko00380: Tryptophan metabolism; ko01100: Metabolic pathways; ko01110: Biosynthesis of secondary metabolites
TraesCS7D02G066400	-5.97939	1.03669e-17	5.36292e-16	down	K00430 peroxidase [EC:1.11.1.7] | (RefSeq) cationic peroxidase SPC4 (A)	ko00940: Phenylpropanoid biosynthesis; ko01100: Metabolic pathways; ko01110: Biosynthesis of secondary metabolites
TraesCS7D02G064300	-3.92466	1.62996e-06	1.56248e-05	down	K13679 granule-bound starch synthase [EC:2.4.1.242] | (RefSeq) granule-bound starch synthase 1, chloroplastic/amyloplastic-like (A)	ko00500: Starch and sucrose metabolism; ko01100: Metabolic pathways; ko01110: Biosynthesis of secondary metabolites
TraesCS7D02G063900	-1.72128	8.67591e-06	7.00384e-05	down	K01583 arginine decarboxylase [EC:4.1.1.19] | (RefSeq) arginine decarboxylase 1 (A)	ko00330: Arginine and proline metabolism; ko01100: Metabolic pathways
TraesCS7D02G052900	1.38656	3.10591e-11	7.1951e-10	up	K13412 calcium-dependent protein kinase [EC:2.7.11.1] | (RefSeq) CPK17-1_1; calcium dependent protein kinase 17 (A)	ko04626: Plant-pathogen interaction
TraesCS7D02G032800	-1.55404	9.85092e-09	1.48096e-07	down	K04077 chaperonin GroEL | (RefSeq) ruBisCO large subunit-binding protein subunit beta, chloroplastic (A)	ko03018: RNA degradation
TraesCS7D02G004400	1.28072	2.18386e-11	5.16879e-10	up	K00232 acyl-CoA oxidase [EC:1.3.3.6] | (RefSeq) peroxisomal acyl-coenzyme A oxidase 1-like (A)	ko00071: Fatty acid degradation; ko00410: beta-Alanine metabolism; ko00592: alpha-Linolenic acid metabolism; ko00640: Propanoate metabolism; ko01040: Biosynthesis of unsaturated fatty acids; ko01100: Metabolic pathways; ko01110: Biosynthesis of secondary metabolites; ko01200: Carbon metabolism; ko01212: Fatty acid metabolism; ko04146: Peroxisome
TraesCS7D02G004300	1.22234	0.00101294	0.00452607	up	K07466 replication factor A1 | (RefSeq) uncharacterized protein At4g28440 (A)	ko03030: DNA replication; ko03420: Nucleotide excision repair; ko03430: Mismatch repair; ko03440: Homologous recombination
TraesCS7D02G004100	1.09876	0.0098714	0.0305215	up	K00451 homogentisate 1,2-dioxygenase [EC:1.13.11.5] | (RefSeq) homogentisate 1,2-dioxygenase (A)	ko00350: Tyrosine metabolism; ko01100: Metabolic pathways
TraesCS7D02G004000	4.6293	1.9836e-05	0.000145604	up	K01853 cycloartenol synthase [EC:5.4.99.8] | (RefSeq) cycloartenol synthase 2 (A)	ko00100: Steroid biosynthesis; ko01100: Metabolic pathways; ko01110: Biosynthesis of secondary metabolites
TraesCS7D02G001600	1.03212	0.00749844	0.0244266	up	K10260 F-box and WD-40 domain protein 7 | (RefSeq) WD40 repeat-like protein (A)	ko04120: Ubiquitin mediated proteolysis
TraesCS7B02G486800	1.58898	1.71346e-06	1.63316e-05	up	K15718 linoleate 9S-lipoxygenase [EC:1.13.11.58] | (RefSeq) probable linoleate 9S-lipoxygenase 5 (A)	ko00591: Linoleic acid metabolism
TraesCS7B02G482200	1.3377	0.0165681	0.0466215	up	K00695 sucrose synthase [EC:2.4.1.13] | (RefSeq) sucrose synthase 7-like (A)	ko00500: Starch and sucrose metabolism; ko01100: Metabolic pathways; ko01110: Biosynthesis of secondary metabolites
TraesCS7B02G478200	-1.18707	5.23264e-06	4.47115e-05	down	K12133 MYB-related transcription factor LHY | (RefSeq) uncharacterized protein LOC112280611 (A)	ko04712: Circadian rhythm - plant
TraesCS7B02G478100	-4.58041	3.92975e-19	2.38595e-17	down	K22588 acetylserotonin O-methyltransferase, plant [EC:2.1.1.4] | (RefSeq) acetylserotonin O-methyltransferase 3-like (A)	ko00380: Tryptophan metabolism; ko01100: Metabolic pathways; ko01110: Biosynthesis of secondary metabolites
TraesCS7B02G476400	1.0768	8.6559e-05	0.000533723	up	K04120 ent-copalyl diphosphate synthase [EC:5.5.1.13] | (RefSeq) ent-copalyl diphosphate synthase 1, chloroplastic-like isoform X1 (A)	ko00904: Diterpenoid biosynthesis; ko01100: Metabolic pathways; ko01110: Biosynthesis of secondary metabolites
TraesCS7B02G472500	-2.18133	3.94971e-12	1.03564e-10	down	K00700 1,4-alpha-glucan branching enzyme [EC:2.4.1.18] | (RefSeq) 1,4-alpha-glucan-branching enzyme, chloroplastic/amyloplastic-like isoform X1 (A)	ko00500: Starch and sucrose metabolism; ko01100: Metabolic pathways; ko01110: Biosynthesis of secondary metabolites
TraesCS7B02G471500	-4.93775	8.70 × 10-63	1.23 × 10-59	down	K20547 basic endochitinase B [EC:3.2.1.14] | (RefSeq) basic endochitinase A (A)	ko00520: Amino sugar and nucleotide sugar metabolism; ko01100: Metabolic pathways; ko04016: MAPK signaling pathway - plant
TraesCS7B02G471400	-4.91263	2.64 × 10-68	4.42 × 10-65	down	K20547 basic endochitinase B [EC:3.2.1.14] | (RefSeq) basic endochitinase C-like (A)	ko00520: Amino sugar and nucleotide sugar metabolism; ko01100: Metabolic pathways; ko04016: MAPK signaling pathway - plant
TraesCS7B02G463600	-1.82618	0.000204655	0.00113405	down	K13457 disease resistance protein RPM1 | (RefSeq) disease resistance protein RPM1 (A)	ko04626: Plant-pathogen interaction
TraesCS7B02G449900	-1.76483	0.000123189	0.0007257	down	K13457 disease resistance protein RPM1 | (RefSeq) disease resistance protein RPM1-like (A)	ko04626: Plant-pathogen interaction
TraesCS7B02G446900	-1.57283	8.23766e-08	1.038e-06	down	K09487 heat shock protein 90kDa beta | (RefSeq) endoplasmin homolog (A)	ko04141: Protein processing in endoplasmic reticulum; ko04626: Plant-pathogen interaction
TraesCS7B02G445300	1.53908	4.5293e-06	3.92026e-05	up	K18081 myotubularin-related protein 1/2 [EC:3.1.3.64 3.1.3.95] | (RefSeq) phosphatidylinositol-3-phosphatase myotubularin-2-like (A)	ko00562: Inositol phosphate metabolism; ko01100: Metabolic pathways; ko04070: Phosphatidylinositol signaling system
TraesCS7B02G438000	-1.01026	0.00310309	0.0116775	down	K01922 phosphopantothenate---cysteine ligase (ATP) [EC:6.3.2.51] | (RefSeq) phosphopantothenate--cysteine ligase 2-like (A)	ko00770: Pantothenate and CoA biosynthesis; ko01100: Metabolic pathways; ko01240: Biosynthesis of cofactors
TraesCS7B02G431500	1.00462	0.016021	0.045366	up	K03125 transcription initiation factor TFIID subunit 1 [EC:2.3.1.48 2.7.11.1] | (RefSeq) transcription initiation factor TFIID subunit 1-like (A)	ko03022: Basal transcription factors
TraesCS7B02G423200	-1.57134	2.89525e-05	0.000203264	down	K14510 serine/threonine-protein kinase CTR1 [EC:2.7.11.1] | (RefSeq) serine/threonine-protein kinase CTR1 isoform X1 (A)	ko04016: MAPK signaling pathway - plant; ko04075: Plant hormone signal transduction
TraesCS7B02G417900	-2.27066	4.82595e-19	2.91354e-17	down	K09842 abscisic-aldehyde oxidase [EC:1.2.3.14] | (RefSeq) putative aldehyde oxidase-like protein isoform X1 (A)	ko00906: Carotenoid biosynthesis; ko01100: Metabolic pathways; ko01110: Biosynthesis of secondary metabolites
TraesCS7B02G412700	1.94901	2.93 × 10-24	2.80 × 10-22	up	K13265 vestitone reductase [EC:1.1.1.348] | (RefSeq) uncharacterized protein LOC100794209 (A)	ko00943: Isoflavonoid biosynthesis; ko01100: Metabolic pathways; ko01110: Biosynthesis of secondary metabolites
TraesCS7B02G411500	1.11305	0.000235572	0.00128396	up	K12864 beta-catenin-like protein 1 | (RefSeq) beta-catenin-like protein 1 (A)	ko03040: Spliceosome
TraesCS7B02G401900	-1.18738	0.00310438	0.0116799	down	K09833 homogentisate phytyltransferase / homogentisate geranylgeranyltransferase [EC:2.5.1.115 2.5.1.116] | (RefSeq) probable homogentisate phytyltransferase 1, chloroplastic (A)	ko00130: Ubiquinone and other terpenoid-quinone biosynthesis; ko01100: Metabolic pathways; ko01110: Biosynthesis of secondary metabolites; ko01240: Biosynthesis of cofactors
TraesCS7B02G401500	2.20113	0.000522157	0.00256948	up	K01193 beta-fructofuranosidase [EC:3.2.1.26] | (RefSeq) beta-fructofuranosidase, insoluble isoenzyme 3-like (A)	ko00052: Galactose metabolism; ko00500: Starch and sucrose metabolism; ko01100: Metabolic pathways; ko01110: Biosynthesis of secondary metabolites
TraesCS7B02G398900	1.05007	0.00081157	0.00375884	up	K01489 cytidine deaminase [EC:3.5.4.5] | (RefSeq) cytidine deaminase 1-like (A)	ko00240: Pyrimidine metabolism; ko01100: Metabolic pathways; ko01232: Nucleotide metabolism
TraesCS7B02G395100	-1.48116	3.46633e-07	3.8652e-06	down	K10583 ubiquitin-conjugating enzyme E2 S [EC:2.3.2.23] | (RefSeq) ubiquitin-conjugating enzyme E2 22-like (A)	ko04120: Ubiquitin mediated proteolysis
TraesCS7B02G395000	1.67773	6.66597e-06	5.54962e-05	up	K13436 pto-interacting protein 1 [EC:2.7.11.1] | (RefSeq) PTI1-like tyrosine-protein kinase 1 isoform X1 (A)	ko04626: Plant-pathogen interaction
TraesCS7B02G394300	-1.59866	1.86881e-05	0.000138222	down	K08486 syntaxin 1B/2/3 | (RefSeq) syntaxin-132-like (A)	ko04130: SNARE interactions in vesicular transport
TraesCS7B02G390000	1.128	0.00438634	0.0156157	up	K08852 serine/threonine-protein kinase/endoribonuclease IRE1 [EC:2.7.11.1 3.1.26.-] | (RefSeq) serine/threonine-protein kinase/endoribonuclease IRE1a (A)	ko04141: Protein processing in endoplasmic reticulum
TraesCS7B02G388700	-3.20127	3.2154e-11	7.4391e-10	down	K13448 calcium-binding protein CML | (RefSeq) probable calcium-binding protein CML50 (A)	ko04626: Plant-pathogen interaction
TraesCS7B02G385900	1.21474	0.000297063	0.00157124	up	K03100 signal peptidase I [EC:3.4.21.89] | (RefSeq) chloroplast processing peptidase-like isoform X1 (A)	ko03060: Protein export
TraesCS7B02G378900	-1.05359	0.00735418	0.0240435	down	K10597 ubiquitin conjugation factor E4 B [EC:2.3.2.27] | (RefSeq) probable ubiquitin conjugation factor E4 (A)	ko04120: Ubiquitin mediated proteolysis; ko04141: Protein processing in endoplasmic reticulum
TraesCS7B02G370800	1.01795	0.000343869	0.00178804	up	K02964 small subunit ribosomal protein S18e | (RefSeq) 40S ribosomal protein S18 (A)	ko03010: Ribosome
TraesCS7B02G369100	1.22981	0.0166165	0.0467307	up	K09490 endoplasmic reticulum chaperone BiP [EC:3.6.4.10] | (RefSeq) luminal-binding protein-like (A)	ko03060: Protein export; ko04141: Protein processing in endoplasmic reticulum
TraesCS7B02G366600	-1.33086	0.0018038	0.0073771	down	K08770 ubiquitin C | (RefSeq) polyubiquitin-like (A)	ko04120: Ubiquitin mediated proteolysis
TraesCS7B02G366400	2.20966	7.15416e-08	9.1005e-07	up	K08770 ubiquitin C | (RefSeq) polyubiquitin-like isoform X1 (A)	ko04120: Ubiquitin mediated proteolysis
TraesCS7B02G364700	3.22833	7.47302e-09	1.15197e-07	up	K01187 alpha-glucosidase [EC:3.2.1.20] | (RefSeq) alpha-glucosidase-like isoform X1 (A)	ko00052: Galactose metabolism; ko00500: Starch and sucrose metabolism; ko01100: Metabolic pathways; ko01110: Biosynthesis of secondary metabolites
TraesCS7B02G355700	-1.91761	0.00185996	0.00757538	down	K21995 cytochrome P450 family 77 subfamily A [EC:1.14.-.-] | (RefSeq) cytochrome P450 77A3-like (A)	ko00073: Cutin, suberine and wax biosynthesis
TraesCS7B02G354500	1.12057	2.07385e-05	0.000151275	up	K14003 prolactin regulatory element-binding protein | (RefSeq) SEC12-like protein 1 (A)	ko04141: Protein processing in endoplasmic reticulum
TraesCS7B02G354100	1.44885	6.96832e-09	1.08133e-07	up	K08770 ubiquitin C | (RefSeq) polyubiquitin (A)	ko04120: Ubiquitin mediated proteolysis
TraesCS7B02G353600	1.61382	0.0111169	0.0336787	up	K03097 casein kinase II subunit alpha [EC:2.7.11.1] | (RefSeq) casein kinase II subunit alpha-like isoform X2 (A)	ko03008: Ribosome biogenesis in eukaryotes; ko04712: Circadian rhythm - plant
TraesCS7B02G350500	-2.71076	1.84191e-08	2.628e-07	down	K13082 bifunctional dihydroflavonol 4-reductase/flavanone 4-reductase [EC:1.1.1.219 1.1.1.234] | (RefSeq) dihydroflavonol-4-reductase-like (A)	ko00941: Flavonoid biosynthesis; ko01100: Metabolic pathways; ko01110: Biosynthesis of secondary metabolites
TraesCS7B02G350300	-1.80977	0.000300107	0.00158514	down	K01188 beta-glucosidase [EC:3.2.1.21] | (RefSeq) beta-glucosidase 25 isoform X1 (A)	ko00460: Cyanoamino acid metabolism; ko00500: Starch and sucrose metabolism; ko00999: Biosynthesis of various plant secondary metabolites; ko01100: Metabolic pathways; ko01110: Biosynthesis of secondary metabolites
TraesCS7B02G347100	-5.11649	2.34 × 10-56	2.27 × 10-53	down	K13993 HSP20 family protein | (RefSeq) 17.5 kDa class II heat shock protein-like (A)	ko04141: Protein processing in endoplasmic reticulum
TraesCS7B02G340200	1.49798	1.90642e-09	3.25589e-08	up	K12483 EH domain-containing protein 1 | (RefSeq) EH domain-containing protein 1-like (A)	ko04144: Endocytosis
TraesCS7B02G339600	-1.38601	0.0163102	0.0460361	down	K14018 phospholipase A-2-activating protein | (RefSeq) uncharacterized protein LOC119301361 (A)	ko04141: Protein processing in endoplasmic reticulum
TraesCS7B02G338900	1.15023	0.00112398	0.00493932	up	K05933 aminocyclopropanecarboxylate oxidase [EC:1.14.17.4] | (RefSeq) 1-aminocyclopropane-1-carboxylate oxidase 5-like (A)	ko00270: Cysteine and methionine metabolism; ko01100: Metabolic pathways; ko01110: Biosynthesis of secondary metabolites
TraesCS7B02G335600	-1.73511	0.000135371	0.000789208	down	K13513 lysocardiolipin and lysophospholipid acyltransferase [EC:2.3.1.- 2.3.1.51] | (RefSeq) probable 1-acyl-sn-glycerol-3-phosphate acyltransferase 4 isoform X1 (A)	ko00561: Glycerolipid metabolism; ko00564: Glycerophospholipid metabolism; ko01100: Metabolic pathways; ko01110: Biosynthesis of secondary metabolites
TraesCS7B02G334700	-5.2176	2.70283e-08	3.75421e-07	down	K13420 LRR receptor-like serine/threonine-protein kinase FLS2 [EC:2.7.11.1] | (RefSeq) putative receptor-like protein kinase At3g47110 (A)	ko04016: MAPK signaling pathway - plant; ko04626: Plant-pathogen interaction
TraesCS7B02G332200	1.06395	3.36818e-05	0.00023217	up	K01191 alpha-mannosidase [EC:3.2.1.24] | (RefSeq) alpha-mannosidase At3g26720-like (A)	ko00511: Other glycan degradation
TraesCS7B02G328400	-1.54961	6.57862e-10	1.21509e-08	down	K00430 peroxidase [EC:1.11.1.7] | (RefSeq) peroxidase 16-like (A)	ko00940: Phenylpropanoid biosynthesis; ko01100: Metabolic pathways; ko01110: Biosynthesis of secondary metabolites
TraesCS7B02G324800	7.71913	3.55586e-07	3.95268e-06	up	K03809 NAD(P)H dehydrogenase (quinone) [EC:1.6.5.2] | (RefSeq) quinone-oxidoreductase QR2-like (A)	ko00130: Ubiquinone and other terpenoid-quinone biosynthesis; ko01100: Metabolic pathways; ko01110: Biosynthesis of secondary metabolites; ko01240: Biosynthesis of cofactors
TraesCS7B02G322900	-2.17588	1.64784e-11	3.98295e-10	down	K20535 mitogen-activated protein kinase 1/2 [EC:2.7.11.24] | (RefSeq) mitogen-activated protein kinase 4 (A)	ko04016: MAPK signaling pathway - plant
TraesCS7B02G316600	2.27042	5.4845e-10	1.03189e-08	up	K14486 auxin response factor | (RefSeq) auxin response factor 7 (A)	ko04075: Plant hormone signal transduction
TraesCS7B02G316000	1.71113	0.00162296	0.0067421	up	K03030 26S proteasome regulatory subunit N11 | (RefSeq) 26S proteasome non-ATPase regulatory subunit 14 homolog (A)	ko03050: Proteasome
TraesCS7B02G313700	1.20223	6.50997e-06	5.43581e-05	up	K01513 ectonucleotide pyrophosphatase/phosphodiesterase family member 1/3 [EC:3.1.4.1 3.6.1.9] | (RefSeq) uncharacterized protein LOC109769794 (A)	ko00230: Purine metabolism; ko00240: Pyrimidine metabolism; ko00500: Starch and sucrose metabolism; ko00740: Riboflavin metabolism; ko00760: Nicotinate and nicotinamide metabolism; ko00770: Pantothenate and CoA biosynthesis; ko01100: Metabolic pathways; ko01110: Biosynthesis of secondary metabolites; ko01232: Nucleotide metabolism
TraesCS7B02G313300	-1.85181	0.00615182	0.0207354	down	K10589 ubiquitin-protein ligase E3 C [EC:2.3.2.26] | (RefSeq) E3 ubiquitin-protein ligase UPL6-like isoform X1 (A)	ko04120: Ubiquitin mediated proteolysis
TraesCS7B02G311500	2.62951	0.000142943	0.000828208	up	K13420 LRR receptor-like serine/threonine-protein kinase FLS2 [EC:2.7.11.1] | (RefSeq) LRR receptor-like serine/threonine-protein kinase FLS2 (A)	ko04016: MAPK signaling pathway - plant; ko04626: Plant-pathogen interaction
TraesCS7B02G310700	-3.20776	2.1645e-18	1.21235e-16	down	K15639 PHYB activation tagged suppressor 1 [EC:1.14.-.-] | (RefSeq) cytochrome P450 734A1-like (A)	ko00905: Brassinosteroid biosynthesis; ko01110: Biosynthesis of secondary metabolites
TraesCS7B02G309900	-2.54321	7.94693e-17	3.75182e-15	down	K20538 mitogen-activated protein kinase 8 [EC:2.7.11.24] | (RefSeq) mitogen-activated protein kinase 8-like isoform X1 (A)	ko04016: MAPK signaling pathway - plant
TraesCS7B02G308800	1.13657	0.00029779	0.00157461	up	K15227 arogenate dehydrogenase (NADP+), plant [EC:1.3.1.78] | (RefSeq) arogenate dehydrogenase 2, chloroplastic-like (A)	ko00400: Phenylalanine, tyrosine and tryptophan biosynthesis; ko01100: Metabolic pathways; ko01110: Biosynthesis of secondary metabolites; ko01230: Biosynthesis of amino acids
TraesCS7B02G306100	1.75074	0.000499739	0.00247148	up	K13510 lysophosphatidylcholine acyltransferase / lyso-PAF acetyltransferase [EC:2.3.1.23 2.3.1.67] | (RefSeq) lysophospholipid acyltransferase LPEAT2-like isoform X1 (A)	ko00564: Glycerophospholipid metabolism; ko00565: Ether lipid metabolism; ko01100: Metabolic pathways
TraesCS7B02G301400	1.56502	0.000969646	0.00436512	up	K01874 methionyl-tRNA synthetase [EC:6.1.1.10] | (RefSeq) probable methionine--tRNA ligase (A)	ko00450: Selenocompound metabolism; ko00970: Aminoacyl-tRNA biosynthesis; ko01100: Metabolic pathways
TraesCS7B02G299500	-8.51476	1.79836e-10	3.66454e-09	down	K00487 trans-cinnamate 4-monooxygenase [EC:1.14.14.91] | (RefSeq) cytochrome P450 CYP73A100-like (A)	ko00130: Ubiquinone and other terpenoid-quinone biosynthesis; ko00940: Phenylpropanoid biosynthesis; ko00941: Flavonoid biosynthesis; ko00945: Stilbenoid, diarylheptanoid and gingerol biosynthesis; ko01100: Metabolic pathways; ko01110: Biosynthesis of secondary metabolites
TraesCS7B02G298900	-2.71838	2.95 × 10-49	1.77 × 10-46	down	K09753 cinnamoyl-CoA reductase [EC:1.2.1.44] | (RefSeq) cinnamoyl-CoA reductase 1-like isoform X1 (A)	ko00940: Phenylpropanoid biosynthesis; ko01100: Metabolic pathways; ko01110: Biosynthesis of secondary metabolites
TraesCS7B02G298300	1.50656	0.0125065	0.0370888	up	K09753 cinnamoyl-CoA reductase [EC:1.2.1.44] | (RefSeq) cinnamoyl-CoA reductase 1-like isoform X1 (A)	ko00940: Phenylpropanoid biosynthesis; ko01100: Metabolic pathways; ko01110: Biosynthesis of secondary metabolites
TraesCS7B02G297900	-1.31669	0.00196706	0.00793262	down	K11426 [histone H3]-lysine4/36 N-trimethyltransferase SMYD [EC:2.1.1.354 2.1.1.357] | (RefSeq) histone-lysine N-methyltransferase ASHR1 (A)	ko00310: Lysine degradation; ko01100: Metabolic pathways
TraesCS7B02G297700	1.87673	3.76149e-05	0.000256472	up	K09753 cinnamoyl-CoA reductase [EC:1.2.1.44] | (RefSeq) cinnamoyl-CoA reductase 1-like (A)	ko00940: Phenylpropanoid biosynthesis; ko01100: Metabolic pathways; ko01110: Biosynthesis of secondary metabolites
TraesCS7B02G297100	1.12028	0.0171973	0.0480316	up	K03575 A/G-specific adenine glycosylase [EC:3.2.2.31] | (RefSeq) adenine DNA glycosylase-like (A)	ko03410: Base excision repair
TraesCS7B02G294800	-1.25925	0.00134024	0.00573195	down	K06001 tryptophan synthase beta chain [EC:4.2.1.20] | (RefSeq) tryptophan synthase beta chain 2-like isoform X1 (A)	ko00260: Glycine, serine and threonine metabolism; ko00400: Phenylalanine, tyrosine and tryptophan biosynthesis; ko01100: Metabolic pathways; ko01110: Biosynthesis of secondary metabolites; ko01230: Biosynthesis of amino acids
TraesCS7B02G287900	2.75488	1.97888e-05	0.000145339	up	K07904 Ras-related protein Rab-11A | (RefSeq) ras-related protein RABA3-like (A)	ko04144: Endocytosis
TraesCS7B02G287200	-2.75367	8.27166e-18	4.32927e-16	down	K14488 SAUR family protein | (RefSeq) auxin-responsive protein SAUR32-like (A)	ko04075: Plant hormone signal transduction
TraesCS7B02G285200	-1.29189	0.00782597	0.0252647	down	K00939 adenylate kinase [EC:2.7.4.3] | (RefSeq) adenylate kinase 3-like (A)	ko00230: Purine metabolism; ko00730: Thiamine metabolism; ko01100: Metabolic pathways; ko01110: Biosynthesis of secondary metabolites; ko01232: Nucleotide metabolism; ko01240: Biosynthesis of cofactors
TraesCS7B02G274900	-2.60594	0.00293332	0.0111382	down	K00430 peroxidase [EC:1.11.1.7] | (RefSeq) peroxidase P7-like (A)	ko00940: Phenylpropanoid biosynthesis; ko01100: Metabolic pathways; ko01110: Biosynthesis of secondary metabolites
TraesCS7B02G273600	2.06451	0.000439306	0.00221017	up	K22395 cinnamyl-alcohol dehydrogenase [EC:1.1.1.195] | (RefSeq) berberine bridge enzyme-like 13 (A)	ko00940: Phenylpropanoid biosynthesis; ko01100: Metabolic pathways; ko01110: Biosynthesis of secondary metabolites
TraesCS7B02G269900	1.70177	1.10571e-07	1.35746e-06	up	K00469 inositol oxygenase [EC:1.13.99.1] | (RefSeq) probable inositol oxygenase (A)	ko00053: Ascorbate and aldarate metabolism; ko00562: Inositol phosphate metabolism; ko01100: Metabolic pathways; ko01250: Biosynthesis of nucleotide sugars
TraesCS7B02G269700	1.63613	0.00418459	0.0150113	up	K05665 ATP-binding cassette, subfamily C (CFTR/MRP), member 1 [EC:7.6.2.3] | (RefSeq) ABC transporter C family member 8-like (A)	ko02010: ABC transporters
TraesCS7B02G263500	1.22745	1.39592e-05	0.000106959	up	K04382 serine/threonine-protein phosphatase 2A catalytic subunit [EC:3.1.3.16] | (RefSeq) serine/threonine-protein phosphatase PP2A-1 catalytic subunit-like (A)	ko03015: mRNA surveillance pathway; ko04136: Autophagy - other
TraesCS7B02G259100	-2.46025	2.65597e-05	0.00018812	down	K12355 coniferyl-aldehyde dehydrogenase [EC:1.2.1.68] | (RefSeq) aldehyde dehydrogenase family 2 member C4-like isoform X1 (A)	ko00940: Phenylpropanoid biosynthesis; ko01110: Biosynthesis of secondary metabolites
TraesCS7B02G258300	-1.1908	0.00125598	0.00541974	down	K00208 enoyl-[acyl-carrier protein] reductase I [EC:1.3.1.9 1.3.1.10] | (RefSeq) enoyl-[acyl-carrier-protein] reductase [NADH] 1, chloroplastic-like (A)	ko00061: Fatty acid biosynthesis; ko00780: Biotin metabolism; ko01100: Metabolic pathways; ko01110: Biosynthesis of secondary metabolites; ko01212: Fatty acid metabolism; ko01240: Biosynthesis of cofactors
TraesCS7B02G255800	-1.33907	0.00194623	0.00786222	down	K10781 fatty acyl-ACP thioesterase B [EC:3.1.2.14 3.1.2.21] | (RefSeq) palmitoyl-acyl carrier protein thioesterase, chloroplastic-like (A)	ko00061: Fatty acid biosynthesis; ko01100: Metabolic pathways; ko01212: Fatty acid metabolism
TraesCS7B02G255500	1.15303	0.00166966	0.00690185	up	K16195 eukaryotic translation initiation factor 2-alpha kinase 2 [EC:2.7.11.1] | (RefSeq) cyclin-dependent kinase 11B-like isoform X1 (A)	ko04141: Protein processing in endoplasmic reticulum
TraesCS7B02G253400	2.29431	3.59595e-09	5.89481e-08	up	K00326 cytochrome-b5 reductase [EC:1.6.2.2] | (RefSeq) NADH-cytochrome b5 reductase-like protein (A)	ko00520: Amino sugar and nucleotide sugar metabolism
TraesCS7B02G250400	1.12383	2.96341e-06	2.67171e-05	up	K00232 acyl-CoA oxidase [EC:1.3.3.6] | (RefSeq) acyl-coenzyme A oxidase 3, peroxisomal-like isoform X1 (A)	ko00071: Fatty acid degradation; ko00410: beta-Alanine metabolism; ko00592: alpha-Linolenic acid metabolism; ko00640: Propanoate metabolism; ko01040: Biosynthesis of unsaturated fatty acids; ko01100: Metabolic pathways; ko01110: Biosynthesis of secondary metabolites; ko01200: Carbon metabolism; ko01212: Fatty acid metabolism; ko04146: Peroxisome
TraesCS7B02G250000	-2.13738	9.3824e-06	7.51204e-05	down	K02882 large subunit ribosomal protein L18Ae | (RefSeq) 60S ribosomal protein L18a-like (A)	ko03010: Ribosome
TraesCS7B02G248700	-3.34059	0.000326086	0.00170702	down	K13466 EIX receptor 1/2 | (RefSeq) receptor-like protein EIX2 (A)	ko04626: Plant-pathogen interaction
TraesCS7B02G247700	-1.10829	0.00165424	0.0068503	down	K14009 B-cell receptor-associated protein 31 | (RefSeq) B-cell receptor-associated protein 31-like (A)	ko04141: Protein processing in endoplasmic reticulum
TraesCS7B02G246700	-1.31173	0.000479055	0.00238347	down	K22845 phlorizin synthase [EC:2.4.1.357] | (RefSeq) UDP-glycosyltransferase 88F3-like (A)	ko00941: Flavonoid biosynthesis; ko01110: Biosynthesis of secondary metabolites
TraesCS7B02G239300	-1.38832	1.32806e-07	1.60465e-06	down	K06689 ubiquitin-conjugating enzyme E2 D [EC:2.3.2.23] | (RefSeq) ubiquitin-conjugating enzyme E2 28 (A)	ko04120: Ubiquitin mediated proteolysis; ko04141: Protein processing in endoplasmic reticulum
TraesCS7B02G232700	-1.15027	0.00764537	0.0248002	down	K00797 spermidine synthase [EC:2.5.1.16] | (RefSeq) spermine synthase-like (A)	ko00270: Cysteine and methionine metabolism; ko00330: Arginine and proline metabolism; ko00480: Glutathione metabolism; ko01100: Metabolic pathways
TraesCS7B02G229300	-1.35227	3.60665e-09	5.91053e-08	down	K14397 cleavage and polyadenylation specificity factor subunit 5 | (RefSeq) pre-mRNA cleavage factor Im 25 kDa subunit 1-like (A)	ko03015: mRNA surveillance pathway
TraesCS7B02G228900	1.36026	4.1737e-05	0.000281137	up	K14500 BR-signaling kinase [EC:2.7.11.1] | (RefSeq) probable serine/threonine-protein kinase At5g41260 (A)	ko04075: Plant hormone signal transduction
TraesCS7B02G228700	1.23595	4.90404e-05	0.000323768	up	K08515 vesicle-associated membrane protein 7 | (RefSeq) vesicle-associated membrane protein 714-like (A)	ko04130: SNARE interactions in vesicular transport
TraesCS7B02G225700	1.65855	1.39781e-07	1.68209e-06	up	K02988 small subunit ribosomal protein S5 | (RefSeq) uncharacterized protein LOC119334005 (A)	ko03010: Ribosome
TraesCS7B02G225600	1.32851	0.00308982	0.0116341	up	K00921 1-phosphatidylinositol-3-phosphate 5-kinase [EC:2.7.1.150] | (RefSeq) putative 1-phosphatidylinositol-3-phosphate 5-kinase FAB1D isoform X1 (A)	ko00562: Inositol phosphate metabolism; ko01100: Metabolic pathways; ko04070: Phosphatidylinositol signaling system; ko04145: Phagosome
TraesCS7B02G223200	1.01735	0.000133184	0.000777815	up	K22913 phosphatidylinositol 3,5-bisphosphate 5-phosphatase [EC:3.1.3.-] | (RefSeq) phosphatidylinositol-3-phosphatase SAC1-like isoform X1 (A)	ko00562: Inositol phosphate metabolism; ko01100: Metabolic pathways
TraesCS7B02G222700	1.69366	3.87686e-10	7.47021e-09	up	K22503 aspartyl-tRNA synthetase [EC:6.1.1.12] | (RefSeq) aspartate--tRNA ligase 2, cytoplasmic-like (A)	ko00970: Aminoacyl-tRNA biosynthesis
TraesCS7B02G222500	1.42146	0.0081831	0.0262214	up	K13430 serine/threonine-protein kinase PBS1 [EC:2.7.11.1] | (RefSeq) serine/threonine-protein kinase CDG1 (A)	ko04626: Plant-pathogen interaction
TraesCS7B02G220900	3.00998	3.42395e-06	3.04029e-05	up	K10839 UV excision repair protein RAD23 | (RefSeq) ubiquitin receptor RAD23b-like isoform X1 (A)	ko03420: Nucleotide excision repair; ko04141: Protein processing in endoplasmic reticulum
TraesCS7B02G219600	-3.0363	6.46221e-10	1.19814e-08	down	K09561 STIP1 homology and U-box containing protein 1 [EC:2.3.2.27] | (RefSeq) E3 ubiquitin-protein ligase CHIP-like (A)	ko04120: Ubiquitin mediated proteolysis; ko04141: Protein processing in endoplasmic reticulum
TraesCS7B02G218000	1.39875	5.57098e-08	7.23633e-07	up	K12831 splicing factor 3B subunit 4 | (RefSeq) hypothetical protein (A)	ko03040: Spliceosome
TraesCS7B02G215000	8.2592	3.4533e-09	5.68185e-08	up	K02723 photosystem II PsbY protein | (RefSeq) photosystem II core complex proteins psbY, chloroplastic-like (A)	ko00195: Photosynthesis; ko01100: Metabolic pathways
TraesCS7B02G214900	1.00899	2.18078e-07	2.53366e-06	up	K00235 succinate dehydrogenase (ubiquinone) iron-sulfur subunit [EC:1.3.5.1] | (RefSeq) succinate dehydrogenase [ubiquinone] iron-sulfur subunit 1, mitochondrial isoform X1 (A)	ko00020: Citrate cycle (TCA cycle); ko00190: Oxidative phosphorylation; ko01100: Metabolic pathways; ko01110: Biosynthesis of secondary metabolites; ko01200: Carbon metabolism
TraesCS7B02G211600	-1.54986	0.00818498	0.0262243	down	K16190 glucuronokinase [EC:2.7.1.43] | (RefSeq) transcription factor TDR (A)	ko00040: Pentose and glucuronate interconversions; ko00053: Ascorbate and aldarate metabolism; ko00520: Amino sugar and nucleotide sugar metabolism; ko01100: Metabolic pathways; ko01250: Biosynthesis of nucleotide sugars
TraesCS7B02G206900	-1.72524	1.12448e-10	2.35785e-09	down	K03885 NADH:quinone reductase (non-electrogenic) [EC:1.6.5.9] | (RefSeq) external alternative NAD(P)H-ubiquinone oxidoreductase B2, mitochondrial-like (A)	ko00190: Oxidative phosphorylation; ko01100: Metabolic pathways
TraesCS7B02G203800	-1.42745	6.85797e-07	7.14656e-06	down	K07178 RIO kinase 1 [EC:2.7.11.1] | (RefSeq) serine/threonine-protein kinase RIO1-like (A)	ko03008: Ribosome biogenesis in eukaryotes
TraesCS7B02G203700	-1.02571	0.0141011	0.0408772	down	K04718 sphingosine kinase [EC:2.7.1.91] | (RefSeq) sphingosine kinase 1 isoform X1 (A)	ko00600: Sphingolipid metabolism; ko01100: Metabolic pathways
TraesCS7B02G201600	-1.96148	0.011642	0.0349867	down	K13436 pto-interacting protein 1 [EC:2.7.11.1] | (RefSeq) PTI1-like tyrosine-protein kinase 1 (A)	ko04626: Plant-pathogen interaction
TraesCS7B02G197800	-1.58919	1.62914e-13	5.18705e-12	down	K10256 omega-6 fatty acid desaturase / acyl-lipid omega-6 desaturase (Delta-12 desaturase) [EC:1.14.19.6 1.14.19.22] | (RefSeq) fatty acid desaturase DES2-like (A)	ko01040: Biosynthesis of unsaturated fatty acids; ko01100: Metabolic pathways; ko01212: Fatty acid metabolism
TraesCS7B02G196800	-1.23242	0.00148859	0.00627313	down	K02634 apocytochrome f | (RefSeq) cytochrome f-like (A)	ko00195: Photosynthesis; ko01100: Metabolic pathways
TraesCS7B02G192200	4.37632	0.000280886	0.00149365	up	K01188 beta-glucosidase [EC:3.2.1.21] | (RefSeq) beta-glucosidase 24-like isoform X1 (A)	ko00460: Cyanoamino acid metabolism; ko00500: Starch and sucrose metabolism; ko00999: Biosynthesis of various plant secondary metabolites; ko01100: Metabolic pathways; ko01110: Biosynthesis of secondary metabolites
TraesCS7B02G190400	1.03587	0.000134729	0.000785897	up	K12199 vacuolar protein sorting-associated protein VTA1 | (RefSeq) protein HOMOLOG OF MAMMALIAN LYST-INTERACTING PROTEIN 5 (A)	ko04144: Endocytosis
TraesCS7B02G189900	-1.42486	1.65454e-07	1.96539e-06	down	K01835 phosphoglucomutase [EC:5.4.2.2] | (RefSeq) phosphoglucomutase, chloroplastic (A)	ko00010: Glycolysis / Gluconeogenesis; ko00030: Pentose phosphate pathway; ko00052: Galactose metabolism; ko00230: Purine metabolism; ko00500: Starch and sucrose metabolism; ko00520: Amino sugar and nucleotide sugar metabolism; ko01100: Metabolic pathways; ko01110: Biosynthesis of secondary metabolites; ko01250: Biosynthesis of nucleotide sugars
TraesCS7B02G188000	-2.17951	2.9574e-20	2.05978e-18	down	K12133 MYB-related transcription factor LHY | (RefSeq) protein LHY isoform X1 (A)	ko04712: Circadian rhythm - plant
TraesCS7B02G187000	-1.0568	0.00940583	0.0293209	down	K12811 ATP-dependent RNA helicase DDX46/PRP5 [EC:3.6.4.13] | (RefSeq) DEAD-box ATP-dependent RNA helicase 42-like (A)	ko03040: Spliceosome
TraesCS7B02G186000	-3.40011	8.21065e-05	0.000509616	down	K05349 beta-glucosidase [EC:3.2.1.21] | (RefSeq) probable beta-glucosidase F (A)	ko00460: Cyanoamino acid metabolism; ko00500: Starch and sucrose metabolism; ko00999: Biosynthesis of various plant secondary metabolites; ko01100: Metabolic pathways; ko01110: Biosynthesis of secondary metabolites
TraesCS7B02G183900	1.10415	0.00106282	0.00471235	up	K00753 glycoprotein 3-alpha-L-fucosyltransferase [EC:2.4.1.214] | (RefSeq) putative fucosyltransferase-like protein (A)	ko00513: Various types of N-glycan biosynthesis; ko01100: Metabolic pathways
TraesCS7B02G174800	1.56038	8.68086e-11	1.84886e-09	up	K13338 peroxin-1 | (RefSeq) peroxisome biogenesis protein 1-like (A)	ko04146: Peroxisome
TraesCS7B02G169300	-2.82961	3.59787e-06	3.18099e-05	down	K22097 3-O-acetylpapaveroxine carboxylesterase [EC:3.1.1.105] | (RefSeq) carboxylesterase 1-like (A)	ko00950: Isoquinoline alkaloid biosynthesis; ko01100: Metabolic pathways; ko01110: Biosynthesis of secondary metabolites
TraesCS7B02G167100	-1.58647	0.00573665	0.0195162	down	K08711 ATP-binding cassette, subfamily G (WHITE), member 2, PDR | (RefSeq) ZEB2-regulated ABC transporter 1-like (A)	ko02010: ABC transporters
TraesCS7B02G164600	-2.11479	4.3327e-06	3.76228e-05	down	K13436 pto-interacting protein 1 [EC:2.7.11.1] | (RefSeq) PTI1-like tyrosine-protein kinase 3 (A)	ko04626: Plant-pathogen interaction
TraesCS7B02G158800	-1.31595	6.30307e-08	8.10265e-07	down	K01845 glutamate-1-semialdehyde 2,1-aminomutase [EC:5.4.3.8] | (RefSeq) glutamate-1-semialdehyde 2,1-aminomutase, chloroplastic (A)	ko00860: Porphyrin metabolism; ko01100: Metabolic pathways; ko01110: Biosynthesis of secondary metabolites; ko01240: Biosynthesis of cofactors
TraesCS7B02G156900	2.58761	7.00829e-05	0.000443113	up	K01052 lysosomal acid lipase/cholesteryl ester hydrolase [EC:3.1.1.13] | (RefSeq) triacylglycerol lipase 2-like (A)	ko00100: Steroid biosynthesis
TraesCS7B02G149200	-1.56839	7.79001e-12	1.97109e-10	down	K04079 molecular chaperone HtpG | (RefSeq) heat shock protein 81-1 (A)	ko04141: Protein processing in endoplasmic reticulum; ko04626: Plant-pathogen interaction
TraesCS7B02G147500	1.59753	0.00447355	0.0158673	up	K01126 glycerophosphoryl diester phosphodiesterase [EC:3.1.4.46] | (RefSeq) glycerophosphodiester phosphodiesterase GDPD6 isoform X1 (A)	ko00564: Glycerophospholipid metabolism
TraesCS7B02G145400	-2.48714	3.52192e-09	5.78763e-08	down	K14514 ethylene-insensitive protein 3 | (RefSeq) ETHYLENE INSENSITIVE 3-like 3 protein (A)	ko04016: MAPK signaling pathway - plant; ko04075: Plant hormone signal transduction
TraesCS7B02G141900	1.80457	1.65657e-07	1.96736e-06	up	K01176 alpha-amylase [EC:3.2.1.1] | (RefSeq) alpha-amylase isozyme 2A (A)	ko00500: Starch and sucrose metabolism; ko01100: Metabolic pathways; ko01110: Biosynthesis of secondary metabolites
TraesCS7B02G141100	2.15415	3.54713e-05	0.000243313	up	K13082 bifunctional dihydroflavonol 4-reductase/flavanone 4-reductase [EC:1.1.1.219 1.1.1.234] | (RefSeq) dihydroflavonol 4-reductase (A)	ko00941: Flavonoid biosynthesis; ko01100: Metabolic pathways; ko01110: Biosynthesis of secondary metabolites
TraesCS7B02G140600	2.6949	4.82567e-05	0.000319422	up	K00434 L-ascorbate peroxidase [EC:1.11.1.11] | (RefSeq) putative L-ascorbate peroxidase 6 isoform X1 (A)	ko00053: Ascorbate and aldarate metabolism; ko00480: Glutathione metabolism; ko01100: Metabolic pathways
TraesCS7B02G139900	1.71486	0.0010716	0.00474383	up	K13415 protein brassinosteroid insensitive 1 [EC:2.7.10.1 2.7.11.1] | (RefSeq) systemin receptor SR160 (A)	ko04075: Plant hormone signal transduction
TraesCS7B02G138100	1.04597	2.30252e-06	2.12972e-05	up	K03029 26S proteasome regulatory subunit N10 | (RefSeq) 26S proteasome non-ATPase regulatory subunit 4 homolog (A)	ko03050: Proteasome
TraesCS7B02G137500	1.15424	0.00426097	0.0152414	up	K01872 alanyl-tRNA synthetase [EC:6.1.1.7] | (RefSeq) alanine--tRNA ligase-like (A)	ko00970: Aminoacyl-tRNA biosynthesis
TraesCS7B02G137400	1.55029	1.21028e-05	9.41916e-05	up	K14497 protein phosphatase 2C [EC:3.1.3.16] | (RefSeq) protein phosphatase 2C 37-like (A)	ko04016: MAPK signaling pathway - plant; ko04075: Plant hormone signal transduction
TraesCS7B02G136400	-1.81955	1.11783e-12	3.16195e-11	down	K18835 WRKY transcription factor 2 | (RefSeq) probable WRKY transcription factor 2 (A)	ko04626: Plant-pathogen interaction
TraesCS7B02G134600	3.03693	8.23622e-11	1.76081e-09	up	K06617 raffinose synthase [EC:2.4.1.82] | (RefSeq) probable galactinol--sucrose galactosyltransferase 1 isoform X1 (A)	ko00052: Galactose metabolism; ko01100: Metabolic pathways
TraesCS7B02G133900	-1.24599	1.41842e-05	0.000108341	down	K15639 PHYB activation tagged suppressor 1 [EC:1.14.-.-] | (RefSeq) cytochrome P450 734A1-like (A)	ko00905: Brassinosteroid biosynthesis; ko01110: Biosynthesis of secondary metabolites
TraesCS7B02G131400	-2.25398	3.09706e-10	6.06598e-09	down	K19011 achilleol B synthase [EC:5.4.99.48] | (RefSeq) achilleol B synthase-like isoform X1 (A)	ko00909: Sesquiterpenoid and triterpenoid biosynthesis
TraesCS7B02G131100	1.5639	2.73614e-16	1.22167e-14	up	K17212 bisdemethoxycurcumin synthase [EC:2.3.1.211] | (RefSeq) bisdemethoxycurcumin synthase (A)	ko00945: Stilbenoid, diarylheptanoid and gingerol biosynthesis; ko01110: Biosynthesis of secondary metabolites
TraesCS7B02G130900	-3.15757	3.07 × 10-21	2.32551e-19	down	K13993 HSP20 family protein | (RefSeq) 26.2 kDa heat shock protein, mitochondrial-like (A)	ko04141: Protein processing in endoplasmic reticulum
TraesCS7B02G130600	1.03726	6.7074e-05	0.000426458	up	K00122 formate dehydrogenase [EC:1.17.1.9] | (RefSeq) formate dehydrogenase, mitochondrial (A)	ko00630: Glyoxylate and dicarboxylate metabolism; ko01100: Metabolic pathways; ko01200: Carbon metabolism
TraesCS7B02G130200	1.53417	0.00306383	0.0115517	up	K01177 beta-amylase [EC:3.2.1.2] | (RefSeq) beta-amylase 1, chloroplastic (A)	ko00500: Starch and sucrose metabolism; ko01100: Metabolic pathways; ko01110: Biosynthesis of secondary metabolites
TraesCS7B02G128100	-1.28166	0.0153452	0.0438283	down	K01148 poly(A)-specific ribonuclease [EC:3.1.13.4] | (RefSeq) uncharacterized CRM domain-containing protein At3g25440, chloroplastic (A)	ko03018: RNA degradation
TraesCS7B02G127000	1.03744	0.000129944	0.000760721	up	K12616 enhancer of mRNA-decapping protein 4 | (RefSeq) enhancer of mRNA-decapping protein 4-like isoform X1 (A)	ko03018: RNA degradation
TraesCS7B02G126400	2.24151	4.99546e-08	6.55724e-07	up	K10251 17beta-estradiol 17-dehydrogenase / very-long-chain 3-oxoacyl-CoA reductase [EC:1.1.1.62 1.1.1.330] | (RefSeq) very-long-chain 3-oxoacyl-CoA reductase 1-like (A)	ko00062: Fatty acid elongation; ko01040: Biosynthesis of unsaturated fatty acids; ko01100: Metabolic pathways; ko01110: Biosynthesis of secondary metabolites; ko01212: Fatty acid metabolism
TraesCS7B02G125400	1.39001	0.00257066	0.00996307	up	K01613 phosphatidylserine decarboxylase [EC:4.1.1.65] | (RefSeq) phosphatidylserine decarboxylase proenzyme 3-like (A)	ko00564: Glycerophospholipid metabolism; ko01100: Metabolic pathways; ko01110: Biosynthesis of secondary metabolites
TraesCS7B02G121700	3.83028	3.50761e-05	0.000240788	up	K22133 oxalate---CoA ligase [EC:6.2.1.8] | (RefSeq) oxalate--CoA ligase (A)	ko00630: Glyoxylate and dicarboxylate metabolism; ko01100: Metabolic pathways
TraesCS7B02G119800	1.8098	0.00160969	0.00669587	up	K14544 U3 small nucleolar RNA-associated protein 22 | (RefSeq) hypothetical protein (A)	ko03008: Ribosome biogenesis in eukaryotes
TraesCS7B02G119700	1.13279	0.0133549	0.0390847	up	K16224 senescence-induced receptor-like serine/threonine-protein kinase | (RefSeq) senescence-induced receptor-like serine/threonine-protein kinase (A)	ko04016: MAPK signaling pathway - plant; ko04626: Plant-pathogen interaction
TraesCS7B02G117000	-3.28032	0.000194059	0.00108274	down	K23260 scopoletin glucosyltransferase [EC:2.4.1.128] | (RefSeq) LOW QUALITY PROTEIN: scopoletin glucosyltransferase-like (A)	ko00999: Biosynthesis of various plant secondary metabolites; ko01110: Biosynthesis of secondary metabolites
TraesCS7B02G115500	1.10406	0.00317036	0.011898	up	K17906 autophagy-related protein 2 | (RefSeq) autophagy-related protein 2-like (A)	ko04136: Autophagy - other
TraesCS7B02G111700	3.04675	0.000221049	0.00121296	up	K01179 endoglucanase [EC:3.2.1.4] | (RefSeq) endoglucanase 17-like isoform X1 (A)	ko00500: Starch and sucrose metabolism; ko01100: Metabolic pathways
TraesCS7B02G111100	1.09172	1.60178e-07	1.90525e-06	up	K12881 THO complex subunit 4 | (RefSeq) THO complex subunit 4D-like isoform X1 (A)	ko03013: Nucleocytoplasmic transport; ko03015: mRNA surveillance pathway; ko03040: Spliceosome
TraesCS7B02G107800	-2.08338	0.00029101	0.00154242	down	K13464 jasmonate ZIM domain-containing protein | (RefSeq) protein TIFY 11e-like (A)	ko04075: Plant hormone signal transduction
TraesCS7B02G104600	-6.74966	6.93415e-13	2.018e-11	down	K01179 endoglucanase [EC:3.2.1.4] | (RefSeq) endoglucanase 2 (A)	ko00500: Starch and sucrose metabolism; ko01100: Metabolic pathways
TraesCS7B02G103800	-1.51301	1.09138e-16	5.04563e-15	down	K00161 pyruvate dehydrogenase E1 component alpha subunit [EC:1.2.4.1] | (RefSeq) pyruvate dehydrogenase E1 component subunit alpha-2, mitochondrial-like (A)	ko00010: Glycolysis / Gluconeogenesis; ko00020: Citrate cycle (TCA cycle); ko00620: Pyruvate metabolism; ko01100: Metabolic pathways; ko01110: Biosynthesis of secondary metabolites; ko01200: Carbon metabolism
TraesCS7B02G099800	2.14766	0.00012891	0.00075533	up	K00430 peroxidase [EC:1.11.1.7] | (RefSeq) peroxidase 1-like (A)	ko00940: Phenylpropanoid biosynthesis; ko01100: Metabolic pathways; ko01110: Biosynthesis of secondary metabolites
TraesCS7B02G097300	1.38861	1.96362e-07	2.30489e-06	up	K03134 transcription initiation factor TFIID subunit 10 | (RefSeq) transcription initiation factor TFIID subunit 10-like (A)	ko03022: Basal transcription factors
TraesCS7B02G093800	-2.21609	0.0116241	0.0349388	down	K00703 starch synthase [EC:2.4.1.21] | (RefSeq) soluble starch synthase 2-3, chloroplastic/amyloplastic-like (A)	ko00500: Starch and sucrose metabolism; ko01100: Metabolic pathways; ko01110: Biosynthesis of secondary metabolites
TraesCS7B02G092500	-1.86449	4.07403e-05	0.000275152	down	K13648 alpha-1,4-galacturonosyltransferase [EC:2.4.1.43] | (RefSeq) probable galacturonosyltransferase 9 (A)	ko00520: Amino sugar and nucleotide sugar metabolism; ko01100: Metabolic pathways
TraesCS7B02G088700	-3.23893	9.02 × 10-29	1.27 × 10-27	down	K13993 HSP20 family protein | (RefSeq) 17.4 kDa class I heat shock protein-like (A)	ko04141: Protein processing in endoplasmic reticulum
TraesCS7B02G088600	-3.28698	3.00969e-18	1.65797e-16	down	K13993 HSP20 family protein | (RefSeq) 16.9 kDa class I heat shock protein 2-like (A)	ko04141: Protein processing in endoplasmic reticulum
TraesCS7B02G085700	-1.45176	0.0157159	0.0446677	down	K03006 DNA-directed RNA polymerase II subunit RPB1 [EC:2.7.7.6] | (RefSeq) DNA-directed RNA polymerase II subunit RPB1-like (A)	ko03020: RNA polymerase
TraesCS7B02G084300	-2.11044	9.31095e-06	7.46467e-05	down	K00020 3-hydroxyisobutyrate dehydrogenase [EC:1.1.1.31] | (GenBank) 6-phosphogluconate dehydrogenase-like protein (A)	ko00280: Valine, leucine and isoleucine degradation; ko01100: Metabolic pathways
TraesCS7B02G083500	-2.76899	2.90204e-16	1.29036e-14	down	K13993 HSP20 family protein | (RefSeq) 26.2 kDa heat shock protein, mitochondrial-like (A)	ko04141: Protein processing in endoplasmic reticulum
TraesCS7B02G083000	-4.68619	2.64871e-08	3.68286e-07	down	K13993 HSP20 family protein | (RefSeq) 26.2 kDa heat shock protein, mitochondrial-like (A)	ko04141: Protein processing in endoplasmic reticulum
TraesCS7B02G082900	-2.58438	0.000111893	0.000667242	down	K13993 HSP20 family protein | (RefSeq) 26.2 kDa heat shock protein, mitochondrial-like (A)	ko04141: Protein processing in endoplasmic reticulum
TraesCS7B02G081300	-1.02136	6.54053e-06	5.45877e-05	down	K09291 nucleoprotein TPR | (RefSeq) LOW QUALITY PROTEIN: nuclear-pore anchor (A)	ko03013: Nucleocytoplasmic transport
TraesCS7B02G075600	-2.28211	2.37712e-09	4.01111e-08	down	K14432 ABA responsive element binding factor | (RefSeq) bZIP transcription factor 46-like (A)	ko04075: Plant hormone signal transduction
TraesCS7B02G073300	-2.91622	0.00131104	0.00562237	down	K13473 chitin elicitor-binding protein | (RefSeq) uncharacterized protein LOC100384051 precursor (A)	ko04626: Plant-pathogen interaction
TraesCS7B02G072500	2.0607	0.0139832	0.0406015	up	K05391 cyclic nucleotide gated channel, plant | (RefSeq) probable cyclic nucleotide-gated ion channel 20, chloroplastic (A)	ko04626: Plant-pathogen interaction
TraesCS7B02G072300	-1.80056	0.00284803	0.0108668	down	K11866 STAM-binding protein [EC:3.4.19.12] | (RefSeq) AMSH-like ubiquitin thioesterase 3 (A)	ko04144: Endocytosis
TraesCS7B02G071000	1.69415	2.4479e-06	2.24903e-05	up	K13566 omega-amidase [EC:3.5.1.3] | (RefSeq) omega-amidase, chloroplastic-like (A)	ko00250: Alanine, aspartate and glutamate metabolism; ko01100: Metabolic pathways
TraesCS7B02G068900	-1.75893	0.00113276	0.00497341	down	K00423 L-ascorbate oxidase [EC:1.10.3.3] | (RefSeq) LOW QUALITY PROTEIN: L-ascorbate oxidase (A)	ko00053: Ascorbate and aldarate metabolism; ko01100: Metabolic pathways
TraesCS7B02G067200	-2.62968	0.000380024	0.00194988	down	K01785 aldose 1-epimerase [EC:5.1.3.3] | (RefSeq) galactose mutarotase-like (A)	ko00010: Glycolysis / Gluconeogenesis; ko00052: Galactose metabolism; ko01100: Metabolic pathways; ko01110: Biosynthesis of secondary metabolites
TraesCS7B02G067000	-4.17243	1.43387e-08	2.08757e-07	down	K01785 aldose 1-epimerase [EC:5.1.3.3] | (RefSeq) galactose mutarotase-like (A)	ko00010: Glycolysis / Gluconeogenesis; ko00052: Galactose metabolism; ko01100: Metabolic pathways; ko01110: Biosynthesis of secondary metabolites
TraesCS7B02G064900	-1.90753	2.85697e-18	1.57709e-16	down	K06943 nucleolar GTP-binding protein | (RefSeq) nucleolar GTP-binding protein 1-like (A)	ko03008: Ribosome biogenesis in eukaryotes
TraesCS7B02G063800	1.74977	0.000401564	0.00204685	up	K12669 oligosaccharyltransferase complex subunit gamma | (RefSeq) probable dolichyl-diphosphooligosaccharide--protein glycosyltransferase subunit 3 (A)	ko00510: N-Glycan biosynthesis; ko00513: Various types of N-glycan biosynthesis; ko01100: Metabolic pathways; ko04141: Protein processing in endoplasmic reticulum
TraesCS7B02G063500	1.98582	5.03557e-19	3.01972e-17	up	K22913 phosphatidylinositol 3,5-bisphosphate 5-phosphatase [EC:3.1.3.-] | (RefSeq) phosphoinositide phosphatase SAC3-like isoform X1 (A)	ko00562: Inositol phosphate metabolism; ko01100: Metabolic pathways
TraesCS7B02G056700	2.06113	6.7504e-05	0.000428682	up	K05391 cyclic nucleotide gated channel, plant | (RefSeq) cyclic nucleotide-gated ion channel 17-like (A)	ko04626: Plant-pathogen interaction
TraesCS7B02G043200	2.70403	1.04895e-05	8.29511e-05	up	K09487 heat shock protein 90kDa beta | (RefSeq) endoplasmin homolog isoform X1 (A)	ko04141: Protein processing in endoplasmic reticulum; ko04626: Plant-pathogen interaction
TraesCS7B02G042700	-2.65394	5.04345e-05	0.000331866	down	K07964 heparanase [EC:3.2.1.166] | (RefSeq) heparanase-like protein 3 (A)	ko00531: Glycosaminoglycan degradation; ko01100: Metabolic pathways
TraesCS7B02G041600	1.55284	5.28279e-06	4.50896e-05	up	K05278 flavonol synthase [EC:1.14.20.6] | (RefSeq) flavonol synthase/flavanone 3-hydroxylase-like (A)	ko00941: Flavonoid biosynthesis; ko01100: Metabolic pathways; ko01110: Biosynthesis of secondary metabolites
TraesCS7B02G022600	-1.73809	0.00111337	0.00490091	down	K12820 pre-mRNA-splicing factor ATP-dependent RNA helicase DHX15/PRP43 [EC:3.6.4.13] | (RefSeq) F-box protein At5g03970-like (A)	ko03040: Spliceosome
TraesCS7B02G020000	1.94397	3.59943e-14	1.24698e-12	up	K05278 flavonol synthase [EC:1.14.20.6] | (RefSeq) flavonol synthase/flavanone 3-hydroxylase (A)	ko00941: Flavonoid biosynthesis; ko01100: Metabolic pathways; ko01110: Biosynthesis of secondary metabolites
TraesCS7B02G014700	1.02545	0.00637275	0.0213569	up	K14566 U3 small nucleolar RNA-associated protein 24 | (RefSeq) rRNA-processing protein FCF1 homolog (A)	ko03008: Ribosome biogenesis in eukaryotes
TraesCS7B02G006400	1.03147	4.00304e-06	3.50103e-05	up	K01179 endoglucanase [EC:3.2.1.4] | (RefSeq) endoglucanase 23-like (A)	ko00500: Starch and sucrose metabolism; ko01100: Metabolic pathways
TraesCS7B02G000300	1.16793	0.00619213	0.0208444	up	K00799 glutathione S-transferase [EC:2.5.1.18] | (RefSeq) glutathione S-transferase T1-like (A)	ko00480: Glutathione metabolism; ko01100: Metabolic pathways
TraesCS7A02G569900	-3.12118	9.66836e-06	7.72227e-05	down	K13415 protein brassinosteroid insensitive 1 [EC:2.7.10.1 2.7.11.1] | (RefSeq) brassinosteroid LRR receptor kinase BRI1 (A)	ko04075: Plant hormone signal transduction
TraesCS7A02G569600	1.11387	0.00205177	0.00822029	up	K00469 inositol oxygenase [EC:1.13.99.1] | (RefSeq) inositol oxygenase 4-like (A)	ko00053: Ascorbate and aldarate metabolism; ko00562: Inositol phosphate metabolism; ko01100: Metabolic pathways; ko01250: Biosynthesis of nucleotide sugars
TraesCS7A02G557600	2.22955	7.58595e-07	7.8283e-06	up	K00695 sucrose synthase [EC:2.4.1.13] | (RefSeq) sucrose synthase 7-like (A)	ko00500: Starch and sucrose metabolism; ko01100: Metabolic pathways; ko01110: Biosynthesis of secondary metabolites
TraesCS7A02G553800	-1.06639	0.00137963	0.00588206	down	K12133 MYB-related transcription factor LHY | (RefSeq) protein LHY-like (A)	ko04712: Circadian rhythm - plant
TraesCS7A02G552700	1.79953	0.000290654	0.00154084	up	K04120 ent-copalyl diphosphate synthase [EC:5.5.1.13] | (RefSeq) ent-copalyl diphosphate synthase 1, chloroplastic-like (A)	ko00904: Diterpenoid biosynthesis; ko01100: Metabolic pathways; ko01110: Biosynthesis of secondary metabolites
TraesCS7A02G549100	-1.90647	7.07424e-05	0.000446596	down	K00700 1,4-alpha-glucan branching enzyme [EC:2.4.1.18] | (RefSeq) 1,4-alpha-glucan-branching enzyme, chloroplastic/amyloplastic-like isoform X1 (A)	ko00500: Starch and sucrose metabolism; ko01100: Metabolic pathways; ko01110: Biosynthesis of secondary metabolites
TraesCS7A02G548000	-2.42185	3.84029e-13	1.16121e-11	down	K20547 basic endochitinase B [EC:3.2.1.14] | (RefSeq) 26 kDa endochitinase 1-like (A)	ko00520: Amino sugar and nucleotide sugar metabolism; ko01100: Metabolic pathways; ko04016: MAPK signaling pathway - plant
TraesCS7A02G544400	-2.07983	0.000216505	0.00119067	down	K02636 cytochrome b6-f complex iron-sulfur subunit [EC:7.1.1.6] | (RefSeq) cytochrome b6-f complex iron-sulfur subunit, chloroplastic-like (A)	ko00195: Photosynthesis; ko01100: Metabolic pathways
TraesCS7A02G537100	-2.21352	0.00196399	0.00792203	down	K05894 12-oxophytodienoic acid reductase [EC:1.3.1.42] | (RefSeq) 12-oxophytodienoate reductase 1-like (A)	ko00592: alpha-Linolenic acid metabolism; ko01100: Metabolic pathways; ko01110: Biosynthesis of secondary metabolites
TraesCS7A02G528600	1.7985	0.00263869	0.0101813	up	K18081 myotubularin-related protein 1/2 [EC:3.1.3.64 3.1.3.95] | (RefSeq) phosphatidylinositol-3-phosphatase myotubularin-2-like (A)	ko00562: Inositol phosphate metabolism; ko01100: Metabolic pathways; ko04070: Phosphatidylinositol signaling system
TraesCS7A02G515000	1.17649	0.00286701	0.0109263	up	K03125 transcription initiation factor TFIID subunit 1 [EC:2.3.1.48 2.7.11.1] | (RefSeq) transcription initiation factor TFIID subunit 1-like isoform X1 (A)	ko03022: Basal transcription factors
TraesCS7A02G511900	-2.30095	0.00256757	0.00995502	down	K14510 serine/threonine-protein kinase CTR1 [EC:2.7.11.1] | (RefSeq) serine/threonine-protein kinase CTR1 (A)	ko04016: MAPK signaling pathway - plant; ko04075: Plant hormone signal transduction
TraesCS7A02G509200	-2.26353	1.4242e-12	3.98016e-11	down	K09842 abscisic-aldehyde oxidase [EC:1.2.3.14] | (RefSeq) putative aldehyde oxidase-like protein isoform X1 (A)	ko00906: Carotenoid biosynthesis; ko01100: Metabolic pathways; ko01110: Biosynthesis of secondary metabolites
TraesCS7A02G505800	1.18284	0.00225835	0.00892559	up	K01814 phosphoribosylformimino-5-aminoimidazole carboxamide ribotide isomerase [EC:5.3.1.16] | (RefSeq) uncharacterized protein LOC123160288 (A)	ko00340: Histidine metabolism; ko01100: Metabolic pathways; ko01110: Biosynthesis of secondary metabolites; ko01230: Biosynthesis of amino acids
TraesCS7A02G505300	2.16094	2.38812e-20	1.672e-18	up	K08695 anthocyanidin reductase [EC:1.3.1.77] | (RefSeq) anthocyanidin reductase ((2S)-flavan-3-ol-forming) (A)	ko00941: Flavonoid biosynthesis; ko01100: Metabolic pathways; ko01110: Biosynthesis of secondary metabolites
TraesCS7A02G505200	2.56522	1.69216e-06	1.61458e-05	up	K13265 vestitone reductase [EC:1.1.1.348] | (RefSeq) uncharacterized protein LOC100794209 (A)	ko00943: Isoflavonoid biosynthesis; ko01100: Metabolic pathways; ko01110: Biosynthesis of secondary metabolites
TraesCS7A02G501400	3.02749	6.25682e-19	3.71864e-17	up	K15404 aldehyde decarbonylase [EC:4.1.99.5] | (RefSeq) CER1-2; hypothetical protein (A)	ko00073: Cutin, suberine and wax biosynthesis; ko01110: Biosynthesis of secondary metabolites
TraesCS7A02G499900	-1.02957	0.00472023	0.0166141	down	K12857 Prp8 binding protein | (RefSeq) U5 small nuclear ribonucleoprotein 40 kDa protein-like (A)	ko03040: Spliceosome
TraesCS7A02G497700	1.21041	0.00395727	0.0143498	up	K02988 small subunit ribosomal protein S5 | (RefSeq) uncharacterized protein LOC119334005 (A)	ko03010: Ribosome
TraesCS7A02G496000	-1.15194	4.32519e-05	0.000289845	down	K11098 small nuclear ribonucleoprotein F | (RefSeq) probable small nuclear ribonucleoprotein F (A)	ko03040: Spliceosome
TraesCS7A02G492800	1.80774	4.11739e-05	0.000277869	up	K13227 UDP-glucosyltransferase BX8/BX9 [EC:2.4.1.202] | (RefSeq) DIMBOA UDP-glucosyltransferase BX8-like (A)	ko00402: Benzoxazinoid biosynthesis; ko01110: Biosynthesis of secondary metabolites
TraesCS7A02G488200	-1.16107	1.66548e-05	0.000124789	down	K01968 3-methylcrotonyl-CoA carboxylase alpha subunit [EC:6.4.1.4] | (RefSeq) LOW QUALITY PROTEIN: methylcrotonoyl-CoA carboxylase subunit alpha, mitochondrial (A)	ko00280: Valine, leucine and isoleucine degradation; ko01100: Metabolic pathways
TraesCS7A02G487400	4.23591	8.68261e-08	1.08766e-06	up	K00016 L-lactate dehydrogenase [EC:1.1.1.27] | (RefSeq) uncharacterized protein LOC123149284 (A)	ko00010: Glycolysis / Gluconeogenesis; ko00270: Cysteine and methionine metabolism; ko00620: Pyruvate metabolism; ko00640: Propanoate metabolism; ko01100: Metabolic pathways; ko01110: Biosynthesis of secondary metabolites
TraesCS7A02G483700	2.3568	4.98567e-08	6.54759e-07	up	K01859 chalcone isomerase [EC:5.5.1.6] | (RefSeq) vacuolar-sorting receptor 1 (A)	ko00941: Flavonoid biosynthesis; ko01100: Metabolic pathways; ko01110: Biosynthesis of secondary metabolites
TraesCS7A02G481800	-1.40742	0.00618124	0.0208156	down	K08486 syntaxin 1B/2/3 | (RefSeq) syntaxin-132-like (A)	ko04130: SNARE interactions in vesicular transport
TraesCS7A02G465300	1.71361	0.00639534	0.0214179	up	K02927 ubiquitin-large subunit ribosomal protein L40e | (RefSeq) ubiquitin-like (A)	ko03010: Ribosome; ko04120: Ubiquitin mediated proteolysis
TraesCS7A02G464200	3.7662	0.00616592	0.0207718	up	K01187 alpha-glucosidase [EC:3.2.1.20] | (RefSeq) alpha-glucosidase-like isoform X1 (A)	ko00052: Galactose metabolism; ko00500: Starch and sucrose metabolism; ko01100: Metabolic pathways; ko01110: Biosynthesis of secondary metabolites
TraesCS7A02G463900	1.884	4.03974e-08	5.40215e-07	up	K13457 disease resistance protein RPM1 | (RefSeq) disease resistance protein RPM1 (A)	ko04626: Plant-pathogen interaction
TraesCS7A02G455300	-2.86062	7.43323e-05	0.000466452	down	K21995 cytochrome P450 family 77 subfamily A [EC:1.14.-.-] | (RefSeq) cytochrome P450 77A3-like (A)	ko00073: Cutin, suberine and wax biosynthesis
TraesCS7A02G454300	1.13992	0.00556909	0.0190479	up	K01673 carbonic anhydrase [EC:4.2.1.1] | (RefSeq) carbonic anhydrase, chloroplastic-like (A)	ko00910: Nitrogen metabolism; ko01100: Metabolic pathways
TraesCS7A02G454100	1.05826	0.00247279	0.0096505	up	K14003 prolactin regulatory element-binding protein | (RefSeq) SEC12-like protein 1 (A)	ko04141: Protein processing in endoplasmic reticulum
TraesCS7A02G450700	-2.96839	3.80279e-16	1.66731e-14	down	K13082 bifunctional dihydroflavonol 4-reductase/flavanone 4-reductase [EC:1.1.1.219 1.1.1.234] | (RefSeq) dihydroflavonol-4-reductase-like (A)	ko00941: Flavonoid biosynthesis; ko01100: Metabolic pathways; ko01110: Biosynthesis of secondary metabolites
TraesCS7A02G443600	1.38942	0.0105859	0.0323326	up	K13229 2,4-dihydroxy-1,4-benzoxazin-3-one-glucoside dioxygenase [EC:1.14.11.59] | (RefSeq) DIBOA-glucoside dioxygenase BX6-like (A)	ko00402: Benzoxazinoid biosynthesis; ko01110: Biosynthesis of secondary metabolites
TraesCS7A02G440800	-1.58476	0.00301728	0.0114076	down	K14018 phospholipase A-2-activating protein | (RefSeq) uncharacterized protein LOC119301361 (A)	ko04141: Protein processing in endoplasmic reticulum
TraesCS7A02G430000	1.72913	0.00364659	0.0133949	up	K01206 alpha-L-fucosidase [EC:3.2.1.51] | (RefSeq) alpha-L-fucosidase 3 (A)	ko00511: Other glycan degradation
TraesCS7A02G428200	-1.9324	3.32511e-13	1.01518e-11	down	K00430 peroxidase [EC:1.11.1.7] | (RefSeq) peroxidase 16-like (A)	ko00940: Phenylpropanoid biosynthesis; ko01100: Metabolic pathways; ko01110: Biosynthesis of secondary metabolites
TraesCS7A02G424200	1.63682	0.00327782	0.0122421	up	K14407 cleavage stimulation factor subunit 2 | (RefSeq) cleavage stimulating factor 64-like (A)	ko03015: mRNA surveillance pathway
TraesCS7A02G422500	-2.17432	9.4627e-12	2.37243e-10	down	K20535 mitogen-activated protein kinase 1/2 [EC:2.7.11.24] | (RefSeq) mitogen-activated protein kinase 4 (A)	ko04016: MAPK signaling pathway - plant
TraesCS7A02G416400	1.45535	6.03088e-07	6.36276e-06	up	K14486 auxin response factor | (RefSeq) auxin response factor 7 (A)	ko04075: Plant hormone signal transduction
TraesCS7A02G410700	-2.43507	2.94522e-13	9.04493e-12	down	K20538 mitogen-activated protein kinase 8 [EC:2.7.11.24] | (RefSeq) mitogen-activated protein kinase 8-like isoform X1 (A)	ko04016: MAPK signaling pathway - plant
TraesCS7A02G409100	1.27795	0.00939095	0.0292797	up	K15227 arogenate dehydrogenase (NADP+), plant [EC:1.3.1.78] | (RefSeq) arogenate dehydrogenase 2, chloroplastic-like (A)	ko00400: Phenylalanine, tyrosine and tryptophan biosynthesis; ko01100: Metabolic pathways; ko01110: Biosynthesis of secondary metabolites; ko01230: Biosynthesis of amino acids
TraesCS7A02G406500	-2.22976	0.00446704	0.0158513	down	K01051 pectinesterase [EC:3.1.1.11] | (RefSeq) pectinesterase (A)	ko00040: Pentose and glucuronate interconversions; ko01100: Metabolic pathways
TraesCS7A02G398900	-10.6395	4.78767e-18	2.57639e-16	down	K00487 trans-cinnamate 4-monooxygenase [EC:1.14.14.91] | (RefSeq) cytochrome P450 CYP73A100-like (A)	ko00130: Ubiquinone and other terpenoid-quinone biosynthesis; ko00940: Phenylpropanoid biosynthesis; ko00941: Flavonoid biosynthesis; ko00945: Stilbenoid, diarylheptanoid and gingerol biosynthesis; ko01100: Metabolic pathways; ko01110: Biosynthesis of secondary metabolites
TraesCS7A02G398600	-1.37946	3.7157e-06	3.27542e-05	down	K03350 anaphase-promoting complex subunit 3 | (RefSeq) cell division cycle protein 27 homolog B-like isoform X1 (A)	ko04120: Ubiquitin mediated proteolysis
TraesCS7A02G398000	-1.5495	7.87702e-06	6.42583e-05	down	K09753 cinnamoyl-CoA reductase [EC:1.2.1.44] | (RefSeq) cinnamoyl-CoA reductase 2-like (A)	ko00940: Phenylpropanoid biosynthesis; ko01100: Metabolic pathways; ko01110: Biosynthesis of secondary metabolites
TraesCS7A02G395900	-1.41015	0.0151213	0.0432928	down	K11426 [histone H3]-lysine4/36 N-trimethyltransferase SMYD [EC:2.1.1.354 2.1.1.357] | (RefSeq) histone-lysine N-methyltransferase ASHR1 (A)	ko00310: Lysine degradation; ko01100: Metabolic pathways
TraesCS7A02G388300	1.25504	3.33513e-09	5.49419e-08	up	K14009 B-cell receptor-associated protein 31 | (RefSeq) B-cell receptor-associated protein 31-like (A)	ko04141: Protein processing in endoplasmic reticulum
TraesCS7A02G385600	1.58131	1.16363e-11	2.8723e-10	up	K00873 pyruvate kinase [EC:2.7.1.40] | (RefSeq) uncharacterized protein LOC118033103 isoform X1 (A)	ko00010: Glycolysis / Gluconeogenesis; ko00620: Pyruvate metabolism; ko01100: Metabolic pathways; ko01110: Biosynthesis of secondary metabolites; ko01200: Carbon metabolism; ko01230: Biosynthesis of amino acids
TraesCS7A02G384600	-2.39323	4.58579e-10	8.72021e-09	down	K14488 SAUR family protein | (RefSeq) auxin-responsive protein SAUR32-like (A)	ko04075: Plant hormone signal transduction
TraesCS7A02G376300	-2.67984	0.0125731	0.0372368	down	K13434 pathogenesis-related genes transcriptional activator PTI6 | (RefSeq) pathogenesis-related genes transcriptional activator PTI6 (A)	ko04626: Plant-pathogen interaction
TraesCS7A02G375600	-1.67099	0.00200846	0.00807155	down	K17879 peroxisomal coenzyme A diphosphatase NUDT7 [EC:3.6.1.-] | (RefSeq) nudix hydrolase 15, mitochondrial (A)	ko04146: Peroxisome
TraesCS7A02G370500	-1.02344	0.00556712	0.0190452	down	K05605 3-hydroxyisobutyryl-CoA hydrolase [EC:3.1.2.4] | (RefSeq) 3-hydroxyisobutyryl-CoA hydrolase-like protein 3, mitochondrial isoform X1 (A)	ko00280: Valine, leucine and isoleucine degradation; ko00410: beta-Alanine metabolism; ko00640: Propanoate metabolism; ko01100: Metabolic pathways; ko01200: Carbon metabolism
TraesCS7A02G370200	-1.12569	0.000717895	0.00337644	down	K00208 enoyl-[acyl-carrier protein] reductase I [EC:1.3.1.9 1.3.1.10] | (RefSeq) enoyl-[acyl-carrier-protein] reductase [NADH] 1, chloroplastic-like (A)	ko00061: Fatty acid biosynthesis; ko00780: Biotin metabolism; ko01100: Metabolic pathways; ko01110: Biosynthesis of secondary metabolites; ko01212: Fatty acid metabolism; ko01240: Biosynthesis of cofactors
TraesCS7A02G368000	-3.61749	2.7917e-05	0.000196769	down	K13435 serine/threonine-protein kinase Pto | (RefSeq) receptor-like protein kinase HERK 1 isoform X2 (A)	ko04626: Plant-pathogen interaction
TraesCS7A02G364400	1.07329	1.46229e-05	0.000111358	up	K04382 serine/threonine-protein phosphatase 2A catalytic subunit [EC:3.1.3.16] | (RefSeq) serine/threonine-protein phosphatase PP2A-1 catalytic subunit (A)	ko03015: mRNA surveillance pathway; ko04136: Autophagy - other
TraesCS7A02G357800	1.80912	4.0525e-13	1.2233e-11	up	K00469 inositol oxygenase [EC:1.13.99.1] | (RefSeq) probable inositol oxygenase (A)	ko00053: Ascorbate and aldarate metabolism; ko00562: Inositol phosphate metabolism; ko01100: Metabolic pathways; ko01250: Biosynthesis of nucleotide sugars
TraesCS7A02G354000	2.90105	1.12275e-05	8.8123e-05	up	K22395 cinnamyl-alcohol dehydrogenase [EC:1.1.1.195] | (RefSeq) berberine bridge enzyme-like 13 (A)	ko00940: Phenylpropanoid biosynthesis; ko01100: Metabolic pathways; ko01110: Biosynthesis of secondary metabolites
TraesCS7A02G353400	-1.39135	5.45001e-14	1.8521e-12	down	K00430 peroxidase [EC:1.11.1.7] | (RefSeq) peroxidase P7-like (A)	ko00940: Phenylpropanoid biosynthesis; ko01100: Metabolic pathways; ko01110: Biosynthesis of secondary metabolites
TraesCS7A02G348900	-1.12721	1.79349e-09	3.07282e-08	down	K01206 alpha-L-fucosidase [EC:3.2.1.51] | (RefSeq) alpha-L-fucosidase 3 (A)	ko00511: Other glycan degradation
TraesCS7A02G345600	-1.8299	9.1893e-08	1.14595e-06	down	K15227 arogenate dehydrogenase (NADP+), plant [EC:1.3.1.78] | (RefSeq) arogenate dehydrogenase 2, chloroplastic-like (A)	ko00400: Phenylalanine, tyrosine and tryptophan biosynthesis; ko01100: Metabolic pathways; ko01110: Biosynthesis of secondary metabolites; ko01230: Biosynthesis of amino acids
TraesCS7A02G344700	-1.31996	7.21991e-08	9.17759e-07	down	K14567 U3 small nucleolar RNA-associated protein 14 | (RefSeq) uncharacterized protein C57A7.06-like isoform X1 (A)	ko03008: Ribosome biogenesis in eukaryotes
TraesCS7A02G343800	-1.53394	8.20865e-09	1.25523e-07	down	K06689 ubiquitin-conjugating enzyme E2 D [EC:2.3.2.23] | (RefSeq) ubiquitin-conjugating enzyme E2 28 (A)	ko04120: Ubiquitin mediated proteolysis; ko04141: Protein processing in endoplasmic reticulum
TraesCS7A02G343000	-3.67865	3.2035e-05	0.000222337	down	K13425 WRKY transcription factor 22 | (RefSeq) probable WRKY transcription factor 27 (A)	ko04016: MAPK signaling pathway - plant; ko04626: Plant-pathogen interaction
TraesCS7A02G340700	-1.8656	3.08577e-13	9.44265e-12	down	K13435 serine/threonine-protein kinase Pto | (RefSeq) receptor-like protein kinase HERK 1 isoform X2 (A)	ko04626: Plant-pathogen interaction
TraesCS7A02G339100	1.2635	4.98225e-08	6.54471e-07	up	K00232 acyl-CoA oxidase [EC:1.3.3.6] | (RefSeq) acyl-coenzyme A oxidase 3, peroxisomal-like (A)	ko00071: Fatty acid degradation; ko00410: beta-Alanine metabolism; ko00592: alpha-Linolenic acid metabolism; ko00640: Propanoate metabolism; ko01040: Biosynthesis of unsaturated fatty acids; ko01100: Metabolic pathways; ko01110: Biosynthesis of secondary metabolites; ko01200: Carbon metabolism; ko01212: Fatty acid metabolism; ko04146: Peroxisome
TraesCS7A02G334900	1.47542	0.0171793	0.0479981	up	K00815 tyrosine aminotransferase [EC:2.6.1.5] | (RefSeq) nicotianamine aminotransferase 1-like (A)	ko00130: Ubiquinone and other terpenoid-quinone biosynthesis; ko00270: Cysteine and methionine metabolism; ko00350: Tyrosine metabolism; ko00360: Phenylalanine metabolism; ko00400: Phenylalanine, tyrosine and tryptophan biosynthesis; ko00950: Isoquinoline alkaloid biosynthesis; ko00960: Tropane, piperidine and pyridine alkaloid biosynthesis; ko01100: Metabolic pathways; ko01110: Biosynthesis of s…
TraesCS7A02G334300	-1.81193	0.000205566	0.00113862	down	K22845 phlorizin synthase [EC:2.4.1.357] | (RefSeq) anthocyanidin 5,3-O-glucosyltransferase-like (A)	ko00941: Flavonoid biosynthesis; ko01110: Biosynthesis of secondary metabolites
TraesCS7A02G333300	4.64291	2.44438e-10	4.86964e-09	up	K12934 anthocyanin 5-O-glucoside-6'''-O-malonyltransferase [EC:2.3.1.172] | (RefSeq) malonyl-coenzyme:anthocyanin 5-O-glucoside-6'''-O-malonyltransferase (A)	ko00942: Anthocyanin biosynthesis; ko01110: Biosynthesis of secondary metabolites
TraesCS7A02G331900	-1.21583	0.00123452	0.00534521	down	K02921 large subunit ribosomal protein L37Ae | (RefSeq) 60S ribosomal protein L37a-1 (A)	ko03010: Ribosome
TraesCS7A02G328600	1.11303	5.47458e-09	8.67918e-08	up	K14397 cleavage and polyadenylation specificity factor subunit 5 | (RefSeq) pre-mRNA cleavage factor Im 25 kDa subunit 1-like (A)	ko03015: mRNA surveillance pathway
TraesCS7A02G328500	3.69873	0.00343962	0.0127582	up	K13667 EGF-domain serine glucosyl/xylosyltransferase [EC:2.4.1.376 2.4.2.63] | (RefSeq) O-glucosyltransferase rumi (A)	ko00514: Other types of O-glycan biosynthesis
TraesCS7A02G328100	1.38975	0.000440694	0.00221548	up	K14500 BR-signaling kinase [EC:2.7.11.1] | (RefSeq) probable serine/threonine-protein kinase At5g41260 (A)	ko04075: Plant hormone signal transduction
TraesCS7A02G325300	1.39594	2.47723e-06	2.27402e-05	up	K12827 splicing factor 3A subunit 3 | (RefSeq) splicing factor SF3a60 homolog (A)	ko03040: Spliceosome
TraesCS7A02G322300	1.00036	0.000217332	0.00119465	up	K22913 phosphatidylinositol 3,5-bisphosphate 5-phosphatase [EC:3.1.3.-] | (RefSeq) phosphatidylinositol-3-phosphatase SAC1-like isoform X1 (A)	ko00562: Inositol phosphate metabolism; ko01100: Metabolic pathways
TraesCS7A02G321600	-2.17267	0.000191768	0.00107242	down	K16224 senescence-induced receptor-like serine/threonine-protein kinase | (RefSeq) senescence-induced receptor-like serine/threonine-protein kinase (A)	ko04016: MAPK signaling pathway - plant; ko04626: Plant-pathogen interaction
TraesCS7A02G321400	-1.96491	0.000138166	0.000803928	down	K05665 ATP-binding cassette, subfamily C (CFTR/MRP), member 1 [EC:7.6.2.3] | (RAP-DB) Os01g0173900; Similar to MRP-like ABC transporter. (A)	ko02010: ABC transporters
TraesCS7A02G319000	-2.39842	2.90776e-05	0.000203981	down	K00847 fructokinase [EC:2.7.1.4] | (RefSeq) fructokinase-2-like (A)	ko00051: Fructose and mannose metabolism; ko00500: Starch and sucrose metabolism; ko00520: Amino sugar and nucleotide sugar metabolism; ko01100: Metabolic pathways; ko01110: Biosynthesis of secondary metabolites; ko01250: Biosynthesis of nucleotide sugars
TraesCS7A02G318700	-2.42368	5.83557e-07	6.18231e-06	down	K09561 STIP1 homology and U-box containing protein 1 [EC:2.3.2.27] | (RefSeq) E3 ubiquitin-protein ligase CHIP-like (A)	ko04120: Ubiquitin mediated proteolysis; ko04141: Protein processing in endoplasmic reticulum
TraesCS7A02G316900	1.38458	4.54656e-08	6.00597e-07	up	K12831 splicing factor 3B subunit 4 | (RefSeq) hypothetical protein (A)	ko03040: Spliceosome
TraesCS7A02G316600	-1.89287	3.67906e-06	3.2458e-05	down	K10396 kinesin family member 5 | (RefSeq) kinesin-1-like protein PSS1 (A)	ko04144: Endocytosis
TraesCS7A02G313900	-2.60691	0.00388637	0.0141291	down	K10756 replication factor C subunit 3/5 | (RefSeq) replication factor C subunit 3-like isoform X1 (A)	ko03030: DNA replication; ko03420: Nucleotide excision repair; ko03430: Mismatch repair
TraesCS7A02G311600	1.79826	0.00263938	0.0101832	up	K23452 UDP-glucosyltransferase 85A [EC:2.4.1.-] | (RefSeq) UDP-glycosyltransferase 85A3-like (A)	ko00908: Zeatin biosynthesis; ko01110: Biosynthesis of secondary metabolites
TraesCS7A02G308800	-2.38887	3.40803e-11	7.8508e-10	down	K19893 glucan endo-1,3-beta-glucosidase 5/6 [EC:3.2.1.39] | (RefSeq) glucan endo-1,3-beta-glucosidase 5-like (A)	ko00500: Starch and sucrose metabolism; ko01100: Metabolic pathways
TraesCS7A02G306600	-1.67476	1.16165e-06	1.15282e-05	down	K03885 NADH:quinone reductase (non-electrogenic) [EC:1.6.5.9] | (RefSeq) external alternative NAD(P)H-ubiquinone oxidoreductase B2, mitochondrial-like (A)	ko00190: Oxidative phosphorylation; ko01100: Metabolic pathways
TraesCS7A02G302900	-1.0058	0.0173479	0.0483867	down	K03141 transcription initiation factor TFIIH subunit 1 | (RefSeq) general transcription and DNA repair factor IIH subunit TFB1-1-like (A)	ko03022: Basal transcription factors; ko03420: Nucleotide excision repair
TraesCS7A02G299400	-1.41539	6.32271e-06	5.29599e-05	down	K12133 MYB-related transcription factor LHY | (RefSeq) protein LHY-like (A)	ko04712: Circadian rhythm - plant
TraesCS7A02G294600	-1.98712	0.00353119	0.0130381	down	K11599 proteasome maturation protein | (RefSeq) cyclin-B1-2-like isoform X1 (A)	ko03050: Proteasome
TraesCS7A02G294200	-1.11617	1.25014e-05	9.69695e-05	down	K03844 alpha-1,2-mannosyltransferase [EC:2.4.1.131] | (RefSeq) alpha-1,2-mannosyltransferase (A)	ko00510: N-Glycan biosynthesis; ko00513: Various types of N-glycan biosynthesis; ko01100: Metabolic pathways
TraesCS7A02G286400	-1.67706	0.00102522	0.00456955	down	K02634 apocytochrome f | (RefSeq) cytochrome f-like (A)	ko00195: Photosynthesis; ko01100: Metabolic pathways
TraesCS7A02G286300	1.16156	0.000787115	0.00366302	up	K22911 thiamine phosphate phosphatase / amino-HMP aminohydrolase [EC:3.1.3.100 3.5.99.-] | (RefSeq) bifunctional TH2 protein, mitochondrial-like (A)	ko00730: Thiamine metabolism; ko01100: Metabolic pathways; ko01240: Biosynthesis of cofactors
TraesCS7A02G282600	1.11643	0.00153955	0.00644927	up	K12741 heterogeneous nuclear ribonucleoprotein A1/A3 | (RefSeq) heterogeneous nuclear ribonucleoprotein 1-like (A)	ko03040: Spliceosome
TraesCS7A02G277200	-1.33227	6.79806e-07	7.09103e-06	down	K03938 NADH dehydrogenase (ubiquinone) Fe-S protein 5 | (RefSeq) NADH dehydrogenase [ubiquinone] iron-sulfur protein 5-B-like (A)	ko00190: Oxidative phosphorylation; ko01100: Metabolic pathways
TraesCS7A02G270200	-1.48608	0.00872473	0.0275982	down	K01057 6-phosphogluconolactonase [EC:3.1.1.31] | (RefSeq) probable 6-phosphogluconolactonase 3, chloroplastic (A)	ko00030: Pentose phosphate pathway; ko01100: Metabolic pathways; ko01110: Biosynthesis of secondary metabolites; ko01200: Carbon metabolism
TraesCS7A02G268800	-1.07518	0.00869239	0.0275155	down	K08711 ATP-binding cassette, subfamily G (WHITE), member 2, PDR | (RefSeq) ZEB2-regulated ABC transporter 1-like (A)	ko02010: ABC transporters
TraesCS7A02G268700	1.06522	3.98659e-08	5.34041e-07	up	K20557 transcription factor VIP1 | (RefSeq) transcription factor RF2b-like isoform X1 (A)	ko04016: MAPK signaling pathway - plant
TraesCS7A02G267000	-2.8195	3.55993e-07	3.95638e-06	down	K13412 calcium-dependent protein kinase [EC:2.7.11.1] | (RefSeq) calcium-dependent protein kinase 21-like isoform X1 (A)	ko04626: Plant-pathogen interaction
TraesCS7A02G259100	1.77445	0.00695062	0.0229372	up	K01052 lysosomal acid lipase/cholesteryl ester hydrolase [EC:3.1.1.13] | (RefSeq) triacylglycerol lipase 2-like (A)	ko00100: Steroid biosynthesis
TraesCS7A02G256900	1.04991	0.0154491	0.0440239	up	K17879 peroxisomal coenzyme A diphosphatase NUDT7 [EC:3.6.1.-] | (RefSeq) nudix hydrolase 15, mitochondrial (A)	ko04146: Peroxisome
TraesCS7A02G256600	-2.04711	3.02336e-06	2.72209e-05	down	K08679 UDP-glucuronate 4-epimerase [EC:5.1.3.6] | (RefSeq) UDP-glucuronate 4-epimerase 6-like (A)	ko00053: Ascorbate and aldarate metabolism; ko00520: Amino sugar and nucleotide sugar metabolism; ko01100: Metabolic pathways; ko01240: Biosynthesis of cofactors; ko01250: Biosynthesis of nucleotide sugars
TraesCS7A02G255800	1.96189	0.000433918	0.00218841	up	K02912 large subunit ribosomal protein L32e | (RefSeq) 60S ribosomal protein L32-1-like (A)	ko03010: Ribosome
TraesCS7A02G255500	1.32123	0.00025988	0.00139863	up	K01099 inositol polyphosphate 5-phosphatase INPP5B/F [EC:3.1.3.36] | (RefSeq) type II inositol polyphosphate 5-phosphatase 15-like (A)	ko00562: Inositol phosphate metabolism; ko01100: Metabolic pathways; ko04070: Phosphatidylinositol signaling system
TraesCS7A02G252800	1.31878	2.60775e-05	0.000185268	up	K03029 26S proteasome regulatory subunit N10 | (RefSeq) 26S proteasome non-ATPase regulatory subunit 4 homolog (A)	ko03050: Proteasome
TraesCS7A02G250500	1.077	0.0169728	0.0475328	up	K00434 L-ascorbate peroxidase [EC:1.11.1.11] | (RefSeq) putative L-ascorbate peroxidase 6 isoform X1 (A)	ko00053: Ascorbate and aldarate metabolism; ko00480: Glutathione metabolism; ko01100: Metabolic pathways
TraesCS7A02G250400	-1.35385	2.02334e-05	0.000148055	down	K20547 basic endochitinase B [EC:3.2.1.14] | (RefSeq) endochitinase 1-like (A)	ko00520: Amino sugar and nucleotide sugar metabolism; ko01100: Metabolic pathways; ko04016: MAPK signaling pathway - plant
TraesCS7A02G250100	3.6835	7.58288e-10	1.38527e-08	up	K13082 bifunctional dihydroflavonol 4-reductase/flavanone 4-reductase [EC:1.1.1.219 1.1.1.234] | (RefSeq) dihydroflavonol-4-reductase-like (A)	ko00941: Flavonoid biosynthesis; ko01100: Metabolic pathways; ko01110: Biosynthesis of secondary metabolites
TraesCS7A02G246100	-1.416	0.000150757	0.00086691	down	K14514 ethylene-insensitive protein 3 | (RefSeq) ETHYLENE INSENSITIVE 3-like 3 protein (A)	ko04016: MAPK signaling pathway - plant; ko04075: Plant hormone signal transduction
TraesCS7A02G245200	1.63774	6.0966e-17	2.92473e-15	up	K14396 polyadenylate-binding protein 2 | (RefSeq) RNA-binding protein (A)	ko03015: mRNA surveillance pathway
TraesCS7A02G244800	-1.03927	0.0136956	0.0398898	down	K02910 large subunit ribosomal protein L31e | (RefSeq) 60S ribosomal protein L31 (A)	ko03010: Ribosome
TraesCS7A02G243400	-4.45239	1.92903e-10	3.92035e-09	down	K02872 large subunit ribosomal protein L13Ae | (RefSeq) 60S ribosomal protein L13a-4-like (A)	ko03010: Ribosome
TraesCS7A02G242200	-1.98171	1.96634e-18	1.10949e-16	down	K04079 molecular chaperone HtpG | (RefSeq) heat shock protein 81-1 (A)	ko04141: Protein processing in endoplasmic reticulum; ko04626: Plant-pathogen interaction
TraesCS7A02G240800	-1.57222	6.87374e-06	5.7066e-05	down	K18835 WRKY transcription factor 2 | (RefSeq) probable WRKY transcription factor 2 (A)	ko04626: Plant-pathogen interaction
TraesCS7A02G239200	1.30698	0.00104611	0.0046491	up	K01872 alanyl-tRNA synthetase [EC:6.1.1.7] | (RefSeq) alanine--tRNA ligase-like (A)	ko00970: Aminoacyl-tRNA biosynthesis
TraesCS7A02G239000	-1.27064	0.0011613	0.00507874	down	K02259 heme a synthase [EC:1.17.99.9] | (RefSeq) cytochrome c oxidase assembly protein COX15-like (A)	ko00190: Oxidative phosphorylation; ko00860: Porphyrin metabolism; ko01100: Metabolic pathways; ko01110: Biosynthesis of secondary metabolites; ko01240: Biosynthesis of cofactors
TraesCS7A02G238900	-1.66576	3.40344e-13	1.03732e-11	down	K00161 pyruvate dehydrogenase E1 component alpha subunit [EC:1.2.4.1] | (RefSeq) pyruvate dehydrogenase E1 component subunit alpha-2, mitochondrial (A)	ko00010: Glycolysis / Gluconeogenesis; ko00020: Citrate cycle (TCA cycle); ko00620: Pyruvate metabolism; ko01100: Metabolic pathways; ko01110: Biosynthesis of secondary metabolites; ko01200: Carbon metabolism
TraesCS7A02G236500	3.75432	1.13898e-15	4.71828e-14	up	K06617 raffinose synthase [EC:2.4.1.82] | (RefSeq) probable galactinol--sucrose galactosyltransferase 1 isoform X1 (A)	ko00052: Galactose metabolism; ko01100: Metabolic pathways
TraesCS7A02G235900	1.16644	0.0112931	0.0341109	up	K03022 DNA-directed RNA polymerase III subunit RPC8 | (RefSeq) DNA-directed RNA polymerase III subunit RPC8-like (A)	ko03020: RNA polymerase
TraesCS7A02G232600	1.51423	1.53976e-14	5.61814e-13	up	K17212 bisdemethoxycurcumin synthase [EC:2.3.1.211] | (RefSeq) bisdemethoxycurcumin synthase (A)	ko00945: Stilbenoid, diarylheptanoid and gingerol biosynthesis; ko01110: Biosynthesis of secondary metabolites
TraesCS7A02G232500	-2.61457	7.19455e-19	4.25233e-17	down	K13993 HSP20 family protein | (RefSeq) 26.2 kDa heat shock protein, mitochondrial-like (A)	ko04141: Protein processing in endoplasmic reticulum
TraesCS7A02G232200	1.30708	3.90785e-07	4.29398e-06	up	K00122 formate dehydrogenase [EC:1.17.1.9] | (RefSeq) formate dehydrogenase, mitochondrial (A)	ko00630: Glyoxylate and dicarboxylate metabolism; ko01100: Metabolic pathways; ko01200: Carbon metabolism
TraesCS7A02G225600	8.91795	4.25526e-10	8.14362e-09	up	K08726 soluble epoxide hydrolase / lipid-phosphate phosphatase [EC:3.3.2.10 3.1.3.76] | (RefSeq) uncharacterized protein LOC107492180 (A)	ko00590: Arachidonic acid metabolism; ko01100: Metabolic pathways; ko04146: Peroxisome
TraesCS7A02G223600	1.03887	0.000114383	0.00068027	up	K12199 vacuolar protein sorting-associated protein VTA1 | (RefSeq) protein HOMOLOG OF MAMMALIAN LYST-INTERACTING PROTEIN 5-like (A)	ko04144: Endocytosis
TraesCS7A02G221300	2.48692	1.7752e-09	3.04344e-08	up	K10251 17beta-estradiol 17-dehydrogenase / very-long-chain 3-oxoacyl-CoA reductase [EC:1.1.1.62 1.1.1.330] | (RefSeq) very-long-chain 3-oxoacyl-CoA reductase 1-like (A)	ko00062: Fatty acid elongation; ko01040: Biosynthesis of unsaturated fatty acids; ko01100: Metabolic pathways; ko01110: Biosynthesis of secondary metabolites; ko01212: Fatty acid metabolism
TraesCS7A02G220400	1.00631	0.000798148	0.00370612	up	K12616 enhancer of mRNA-decapping protein 4 | (RefSeq) enhancer of mRNA-decapping protein 4-like isoform X1 (A)	ko03018: RNA degradation
TraesCS7A02G219100	-1.52748	0.000389072	0.00199191	down	K01681 aconitate hydratase [EC:4.2.1.3] | (RefSeq) aconitate hydratase, cytoplasmic-like (A)	ko00020: Citrate cycle (TCA cycle); ko00630: Glyoxylate and dicarboxylate metabolism; ko01100: Metabolic pathways; ko01110: Biosynthesis of secondary metabolites; ko01200: Carbon metabolism; ko01210: 2-Oxocarboxylic acid metabolism; ko01230: Biosynthesis of amino acids
TraesCS7A02G218500	1.7879	0.000111677	0.00066625	up	K12486 stromal membrane-associated protein | (RefSeq) probable ADP-ribosylation factor GTPase-activating protein AGD11 isoform X1 (A)	ko04144: Endocytosis
TraesCS7A02G206600	1.29271	2.27901e-07	2.63748e-06	up	K01512 acylphosphatase [EC:3.6.1.7] | (RefSeq) acylphosphatase-like (A)	ko00620: Pyruvate metabolism; ko01100: Metabolic pathways
TraesCS7A02G202900	-1.42689	1.73513e-06	1.65235e-05	down	K17991 peroxygenase [EC:1.11.2.3] | (RefSeq) probable peroxygenase 5 (A)	ko00073: Cutin, suberine and wax biosynthesis
TraesCS7A02G202200	-4.49984	1.14 × 10-44	5.10 × 10-42	down	K13993 HSP20 family protein | (RefSeq) 16.0 kDa heat shock protein, peroxisomal (A)	ko04141: Protein processing in endoplasmic reticulum
TraesCS7A02G201200	-3.96531	1.14745e-07	1.40355e-06	down	K13464 jasmonate ZIM domain-containing protein | (RefSeq) protein TIFY 11e-like (A)	ko04075: Plant hormone signal transduction
TraesCS7A02G201100	-9.1676	8.88449e-13	2.55089e-11	down	K13464 jasmonate ZIM domain-containing protein | (RefSeq) protein TIFY 11e-like (A)	ko04075: Plant hormone signal transduction
TraesCS7A02G197900	-4.91011	1.10085e-11	2.72741e-10	down	K01179 endoglucanase [EC:3.2.1.4] | (RefSeq) endoglucanase 2-like (A)	ko00500: Starch and sucrose metabolism; ko01100: Metabolic pathways
TraesCS7A02G193200	-1.03527	0.00302361	0.0114275	down	K12272 signal recognition particle receptor subunit beta | (RefSeq) signal recognition particle receptor subunit beta-like (A)	ko03060: Protein export
TraesCS7A02G190700	-1.74634	7.68705e-07	7.92255e-06	down	K21888 glutathione dehydrogenase/transferase [EC:1.8.5.1 2.5.1.18] | (RefSeq) probable glutathione S-transferase DHAR2, chloroplastic (A)	ko00053: Ascorbate and aldarate metabolism; ko00480: Glutathione metabolism; ko01100: Metabolic pathways
TraesCS7A02G189500	-1.22213	1.10077e-05	8.65633e-05	down	K13496 UDP-glucosyltransferase 73C [EC:2.4.1.-] | (RefSeq) UDP-glycosyltransferase 73C5-like (A)	ko00908: Zeatin biosynthesis; ko01110: Biosynthesis of secondary metabolites
TraesCS7A02G188600	1.16392	1.58967e-05	0.000119746	up	K14413 beta-1,3-galactosyltransferase [EC:2.4.1.-] | (RefSeq) beta-1,3-galactosyltransferase GALT1-like (A)	ko00513: Various types of N-glycan biosynthesis; ko01100: Metabolic pathways
TraesCS7A02G183800	-3.12544	8.13 × 10-40	2.59 × 10-37	down	K13993 HSP20 family protein | (RefSeq) 16.9 kDa class I heat shock protein 2-like (A)	ko04141: Protein processing in endoplasmic reticulum
TraesCS7A02G178600	5.20938	8.80119e-12	2.21229e-10	up	K23452 UDP-glucosyltransferase 85A [EC:2.4.1.-] | (RefSeq) UDP-glycosyltransferase 85A2 isoform X2 (A)	ko00908: Zeatin biosynthesis; ko01110: Biosynthesis of secondary metabolites
TraesCS7A02G178500	-3.09458	9.20172e-07	9.33257e-06	down	K00020 3-hydroxyisobutyrate dehydrogenase [EC:1.1.1.31] | (GenBank) 6-phosphogluconate dehydrogenase-like protein (A)	ko00280: Valine, leucine and isoleucine degradation; ko01100: Metabolic pathways
TraesCS7A02G177900	1.02832	2.09327e-06	1.95442e-05	up	K14396 polyadenylate-binding protein 2 | (RefSeq) polyadenylate-binding protein 2-like (A)	ko03015: mRNA surveillance pathway
TraesCS7A02G174700	-2.6642	0.0145417	0.041916	down	K05894 12-oxophytodienoic acid reductase [EC:1.3.1.42] | (RefSeq) 12-oxophytodienoate reductase 1 (A)	ko00592: alpha-Linolenic acid metabolism; ko01100: Metabolic pathways; ko01110: Biosynthesis of secondary metabolites
TraesCS7A02G172600	-4.04683	3.85827e-10	7.43976e-09	down	K17872 demethylphylloquinone reductase [EC:1.6.5.12] | (RefSeq) alternative NAD(P)H-ubiquinone oxidoreductase C1, chloroplastic/mitochondrial isoform X1 (A)	ko00130: Ubiquinone and other terpenoid-quinone biosynthesis; ko01100: Metabolic pathways; ko01110: Biosynthesis of secondary metabolites; ko01240: Biosynthesis of cofactors
TraesCS7A02G170600	-2.4786	1.29081e-09	2.26602e-08	down	K14432 ABA responsive element binding factor | (RefSeq) bZIP transcription factor 46-like (A)	ko04075: Plant hormone signal transduction
TraesCS7A02G170400	4.67036	1.83 × 10-22	1.53 × 10-20	up	K13496 UDP-glucosyltransferase 73C [EC:2.4.1.-] | (RefSeq) UDP-glycosyltransferase 73C6-like (A)	ko00908: Zeatin biosynthesis; ko01110: Biosynthesis of secondary metabolites
TraesCS7A02G170300	2.46099	3.43839e-07	3.83725e-06	up	K13496 UDP-glucosyltransferase 73C [EC:2.4.1.-] | (RefSeq) UDP-glycosyltransferase 73C6-like (A)	ko00908: Zeatin biosynthesis; ko01110: Biosynthesis of secondary metabolites
TraesCS7A02G170200	2.47078	0.00013853	0.000805607	up	K13496 UDP-glucosyltransferase 73C [EC:2.4.1.-] | (RefSeq) UDP-glycosyltransferase 73D1-like (A)	ko00908: Zeatin biosynthesis; ko01110: Biosynthesis of secondary metabolites
TraesCS7A02G168500	-2.93185	6.12432e-11	1.34203e-09	down	K13473 chitin elicitor-binding protein | (RefSeq) uncharacterized protein LOC100384051 precursor (A)	ko04626: Plant-pathogen interaction
TraesCS7A02G167300	1.01486	0.0097603	0.0302409	up	K09680 type II pantothenate kinase [EC:2.7.1.33] | (RefSeq) pantothenate kinase 1-like (A)	ko00770: Pantothenate and CoA biosynthesis; ko01100: Metabolic pathways; ko01240: Biosynthesis of cofactors
TraesCS7A02G163000	-1.33552	0.00309298	0.0116444	down	K00423 L-ascorbate oxidase [EC:1.10.3.3] | (RefSeq) LOW QUALITY PROTEIN: L-ascorbate oxidase (A)	ko00053: Ascorbate and aldarate metabolism; ko01100: Metabolic pathways
TraesCS7A02G160000	-1.52742	1.24469e-06	1.22725e-05	down	K06943 nucleolar GTP-binding protein | (RefSeq) nucleolar GTP-binding protein 1-like (A)	ko03008: Ribosome biogenesis in eukaryotes
TraesCS7A02G159000	1.7093	5.59154e-08	7.2595e-07	up	K22913 phosphatidylinositol 3,5-bisphosphate 5-phosphatase [EC:3.1.3.-] | (RefSeq) phosphoinositide phosphatase SAC3-like isoform X1 (A)	ko00562: Inositol phosphate metabolism; ko01100: Metabolic pathways
TraesCS7A02G156800	1.06436	3.66914e-05	0.000250753	up	K03061 26S proteasome regulatory subunit T1 | (RefSeq) 26S protease regulatory subunit 7A (A)	ko03050: Proteasome
TraesCS7A02G156400	-2.11261	3.67464e-09	6.01274e-08	down	K01597 diphosphomevalonate decarboxylase [EC:4.1.1.33] | (RefSeq) diphosphomevalonate decarboxylase MVD1, peroxisomal-like (A)	ko00900: Terpenoid backbone biosynthesis; ko01100: Metabolic pathways; ko01110: Biosynthesis of secondary metabolites
TraesCS7A02G154900	1.60658	7.76936e-06	6.34962e-05	up	K13413 mitogen-activated protein kinase kinase 4/5 [EC:2.7.12.2] | (RefSeq) mitogen-activated protein kinase kinase 5-like (A)	ko04016: MAPK signaling pathway - plant; ko04075: Plant hormone signal transduction; ko04626: Plant-pathogen interaction
TraesCS7A02G152900	1.25698	0.0016901	0.00697449	up	K05391 cyclic nucleotide gated channel, plant | (RefSeq) cyclic nucleotide-gated ion channel 17-like (A)	ko04626: Plant-pathogen interaction
TraesCS7A02G141400	1.77563	3.0481e-05	0.000212822	up	K07964 heparanase [EC:3.2.1.166] | (RefSeq) heparanase-like protein 3 (A)	ko00531: Glycosaminoglycan degradation; ko01100: Metabolic pathways
TraesCS7A02G140200	2.58928	9.06066e-05	0.000555179	up	K14975 codeine 3-O-demethylase [EC:1.14.11.32] | (RefSeq) codeine O-demethylase (A)	ko00950: Isoquinoline alkaloid biosynthesis; ko01100: Metabolic pathways; ko01110: Biosynthesis of secondary metabolites
TraesCS7A02G133500	2.13389	2.93143e-13	9.0168e-12	up	K01214 isoamylase [EC:3.2.1.68] | (RefSeq) hypothetical protein (A)	ko00500: Starch and sucrose metabolism; ko01100: Metabolic pathways; ko01110: Biosynthesis of secondary metabolites
TraesCS7A02G130400	1.32783	0.000454057	0.00227603	up	K19891 glucan endo-1,3-beta-glucosidase 1/2/3 [EC:3.2.1.39] | (RefSeq) glucan endo-1,3-beta-glucosidase 1 (A)	ko00500: Starch and sucrose metabolism; ko01100: Metabolic pathways
TraesCS7A02G128600	1.93539	0.00335979	0.0124962	up	K11430 [histone H3]-lysine27 N-trimethyltransferase EZH2 [EC:2.1.1.356] | (RefSeq) histone-lysine N-methyltransferase CLF-like isoform X1 (A)	ko00310: Lysine degradation; ko01100: Metabolic pathways
TraesCS7A02G127600	-2.04289	1.39329e-09	2.42917e-08	down	K00588 caffeoyl-CoA O-methyltransferase [EC:2.1.1.104] | (RefSeq) caffeoyl-CoA O-methyltransferase 1-like isoform X1 (A)	ko00940: Phenylpropanoid biosynthesis; ko00941: Flavonoid biosynthesis; ko00945: Stilbenoid, diarylheptanoid and gingerol biosynthesis; ko01100: Metabolic pathways; ko01110: Biosynthesis of secondary metabolites
TraesCS7A02G126500	-1.04408	2.36668e-05	0.000170222	down	K06269 serine/threonine-protein phosphatase PP1 catalytic subunit [EC:3.1.3.16] | (RefSeq) serine/threonine-protein phosphatase PP1 (A)	ko03015: mRNA surveillance pathway
TraesCS7A02G117600	1.23102	8.74288e-05	0.000538527	up	K14566 U3 small nucleolar RNA-associated protein 24 | (RefSeq) rRNA-processing protein FCF1 homolog (A)	ko03008: Ribosome biogenesis in eukaryotes
TraesCS7A02G116100	1.28514	1.48032e-05	0.000112612	up	K12592 exosome complex protein LRP1 | (RefSeq) nuclear nucleic acid-binding protein C1D-like (A)	ko03018: RNA degradation
TraesCS7A02G115300	-7.43846	2.78 × 10-22	2.30 × 10-20	down	K01206 alpha-L-fucosidase [EC:3.2.1.51] | (RefSeq) alpha-L-fucosidase 3-like (A)	ko00511: Other glycan degradation
TraesCS7A02G108400	1.14039	2.15633e-07	2.50846e-06	up	K01179 endoglucanase [EC:3.2.1.4] | (RefSeq) endoglucanase 23-like (A)	ko00500: Starch and sucrose metabolism; ko01100: Metabolic pathways
TraesCS7A02G098200	1.01979	0.0156152	0.044438	up	K02128 F-type H+-transporting ATPase subunit c | (RefSeq) ATP synthase subunit 9, mitochondrial-like (A)	ko00190: Oxidative phosphorylation; ko01100: Metabolic pathways
TraesCS7A02G097100	-2.79479	0.000661082	0.0031477	down	K00679 phospholipid:diacylglycerol acyltransferase [EC:2.3.1.158] | (RefSeq) hypothetical protein (A)	ko00561: Glycerolipid metabolism; ko01100: Metabolic pathways
TraesCS7A02G096800	1.28236	0.00508209	0.0176669	up	K20603 mitogen-activated protein kinase kinase 2 [EC:2.7.12.2] | (RefSeq) mitogen-activated protein kinase kinase 2-like (A)	ko04016: MAPK signaling pathway - plant
TraesCS7A02G094800	-1.50879	0.0103838	0.0318151	down	K14399 polyribonucleotide 5'-hydroxyl-kinase [EC:2.7.1.78] | (RefSeq) Clp1-domain-containing protein (A)	ko03015: mRNA surveillance pathway
TraesCS7A02G093700	-1.667	0.0013343	0.00571109	down	K01895 acetyl-CoA synthetase [EC:6.2.1.1] | (RefSeq) acetyl-CoA synthetase (A)	ko00010: Glycolysis / Gluconeogenesis; ko00620: Pyruvate metabolism; ko00630: Glyoxylate and dicarboxylate metabolism; ko00640: Propanoate metabolism; ko01100: Metabolic pathways; ko01110: Biosynthesis of secondary metabolites; ko01200: Carbon metabolism
TraesCS7A02G089000	-1.59839	1.4767e-13	4.72986e-12	down	K10781 fatty acyl-ACP thioesterase B [EC:3.1.2.14 3.1.2.21] | (RefSeq) palmitoyl-acyl carrier protein thioesterase, chloroplastic-like (A)	ko00061: Fatty acid biosynthesis; ko01100: Metabolic pathways; ko01212: Fatty acid metabolism
TraesCS7A02G088500	1.20742	5.07551e-06	4.3487e-05	up	K10803 DNA-repair protein XRCC1 | (RefSeq) DNA-repair protein XRCC1-like isoform X1 (A)	ko03410: Base excision repair
TraesCS7A02G083700	3.29346	3.52366e-12	9.32416e-11	up	K00799 glutathione S-transferase [EC:2.5.1.18] | (RefSeq) probable glutathione S-transferase isoform X1 (A)	ko00480: Glutathione metabolism; ko01100: Metabolic pathways
TraesCS7A02G070900	-3.72868	6.82023e-13	1.99026e-11	down	K00430 peroxidase [EC:1.11.1.7] | (RefSeq) cationic peroxidase SPC4-like (A)	ko00940: Phenylpropanoid biosynthesis; ko01100: Metabolic pathways; ko01110: Biosynthesis of secondary metabolites
TraesCS7A02G070100	-2.88532	0.000361959	0.00187137	down	K13679 granule-bound starch synthase [EC:2.4.1.242] | (RefSeq) granule-bound starch synthase 1, chloroplastic/amyloplastic isoform X1 (A)	ko00500: Starch and sucrose metabolism; ko01100: Metabolic pathways; ko01110: Biosynthesis of secondary metabolites
TraesCS7A02G069300	-1.20032	0.00718819	0.0235873	down	K01583 arginine decarboxylase [EC:4.1.1.19] | (RefSeq) arginine decarboxylase 1 (A)	ko00330: Arginine and proline metabolism; ko01100: Metabolic pathways
TraesCS7A02G044700	-2.7835	4.33745e-06	3.76517e-05	down	K13457 disease resistance protein RPM1 | (RefSeq) disease resistance protein RPM1-like (A)	ko04626: Plant-pathogen interaction
TraesCS7A02G036200	-1.15598	0.00172887	0.00711475	down	K04077 chaperonin GroEL | (RefSeq) ruBisCO large subunit-binding protein subunit beta, chloroplastic (A)	ko03018: RNA degradation
TraesCS7A02G032000	1.18363	0.0174822	0.0486791	up	K02952 small subunit ribosomal protein S13 | (RefSeq) 30S ribosomal protein S13, chloroplastic-like (A)	ko03010: Ribosome
TraesCS7A02G027700	1.21748	0.0137244	0.0399608	up	K13457 disease resistance protein RPM1 | (RefSeq) disease resistance protein RPM1 (A)	ko04626: Plant-pathogen interaction
TraesCS7A02G024400	5.58673	3.90192e-08	5.24143e-07	up	K02636 cytochrome b6-f complex iron-sulfur subunit [EC:7.1.1.6] | (RefSeq) cytochrome b6-f complex iron-sulfur subunit, chloroplastic-like (A)	ko00195: Photosynthesis; ko01100: Metabolic pathways
TraesCS7A02G003600	2.07369	0.000954566	0.00430593	up	K00451 homogentisate 1,2-dioxygenase [EC:1.13.11.5] | (RefSeq) homogentisate 1,2-dioxygenase-like (A)	ko00350: Tyrosine metabolism; ko01100: Metabolic pathways
TraesCS7A02G002900	-1.05834	0.0153706	0.0438726	down	K05391 cyclic nucleotide gated channel, plant | (RefSeq) cyclic nucleotide-gated ion channel 1-like (A)	ko04626: Plant-pathogen interaction
TraesCS7A02G001900	1.47347	0.000345083	0.0017933	up	K10260 F-box and WD-40 domain protein 7 | (RefSeq) WD40 repeat-like protein (A)	ko04120: Ubiquitin mediated proteolysis
TraesCS6D02G405000	1.60572	4.03623e-07	4.41961e-06	up	K17212 bisdemethoxycurcumin synthase [EC:2.3.1.211] | (RefSeq) bisdemethoxycurcumin synthase (A)	ko00945: Stilbenoid, diarylheptanoid and gingerol biosynthesis; ko01110: Biosynthesis of secondary metabolites
TraesCS6D02G401600	2.81905	0.00806441	0.02591	up	K14492 two-component response regulator ARR-A family | (RefSeq) two-component response regulator ORR3-like (A)	ko04075: Plant hormone signal transduction
TraesCS6D02G400400	-1.16628	0.00797026	0.0256516	down	K13457 disease resistance protein RPM1 | (RefSeq) disease resistance protein RPM1 (A)	ko04626: Plant-pathogen interaction
TraesCS6D02G388700	1.46211	0.00476035	0.01673	up	K13066 caffeic acid 3-O-methyltransferase / acetylserotonin O-methyltransferase [EC:2.1.1.68 2.1.1.4] | (RefSeq) caffeic acid 3-O-methyltransferase (A)	ko00380: Tryptophan metabolism; ko00940: Phenylpropanoid biosynthesis; ko01100: Metabolic pathways; ko01110: Biosynthesis of secondary metabolites
TraesCS6D02G383600	2.42808	4.34079e-06	3.76746e-05	up	K14509 ethylene receptor [EC:2.7.13.-] | (RefSeq) ethylene receptor 3-like (A)	ko04016: MAPK signaling pathway - plant; ko04075: Plant hormone signal transduction
TraesCS6D02G377800	1.04135	4.18906e-05	0.000281871	up	K05757 actin related protein 2/3 complex, subunit 1A/1B | (RefSeq) actin-related protein 2/3 complex subunit 1B-like (A)	ko04144: Endocytosis
TraesCS6D02G372100	-2.06818	1.26474e-05	9.79882e-05	down	K12856 pre-mRNA-processing factor 8 | (RefSeq) pre-mRNA-processing-splicing factor 8A-like (A)	ko03040: Spliceosome
TraesCS6D02G371500	1.6435	0.000438128	0.00220611	up	K13430 serine/threonine-protein kinase PBS1 [EC:2.7.11.1] | (RefSeq) serine/threonine-protein kinase PBS1 (A)	ko04626: Plant-pathogen interaction
TraesCS6D02G370300	-1.36976	0.000522251	0.0025697	down	K00975 glucose-1-phosphate adenylyltransferase [EC:2.7.7.27] | (RefSeq) putative two-component response regulator ARR21 (A)	ko00500: Starch and sucrose metabolism; ko00520: Amino sugar and nucleotide sugar metabolism; ko01100: Metabolic pathways; ko01110: Biosynthesis of secondary metabolites; ko01250: Biosynthesis of nucleotide sugars
TraesCS6D02G368700	-4.2016	2.76162e-16	1.23202e-14	down	K15397 3-ketoacyl-CoA synthase [EC:2.3.1.199] | (RefSeq) 3-ketoacyl-CoA synthase 12-like (A)	ko00062: Fatty acid elongation; ko01100: Metabolic pathways; ko01110: Biosynthesis of secondary metabolites; ko04626: Plant-pathogen interaction
TraesCS6D02G359000	1.01843	4.77539e-09	7.63862e-08	up	K12613 mRNA-decapping enzyme subunit 2 [EC:3.6.1.62] | (RefSeq) mRNA-decapping enzyme subunit 2 (A)	ko03018: RNA degradation
TraesCS6D02G358700	-2.48183	6.8192e-17	3.2423e-15	down	K00020 3-hydroxyisobutyrate dehydrogenase [EC:1.1.1.31] | (RefSeq) probable 3-hydroxyisobutyrate dehydrogenase-like 2, mitochondrial (A)	ko00280: Valine, leucine and isoleucine degradation; ko01100: Metabolic pathways
TraesCS6D02G352200	1.6596	0.0047485	0.0166939	up	K03715 1,2-diacylglycerol 3-beta-galactosyltransferase [EC:2.4.1.46] | (RefSeq) probable monogalactosyldiacylglycerol synthase 3, chloroplastic (A)	ko00561: Glycerolipid metabolism; ko01100: Metabolic pathways
TraesCS6D02G331700	1.02898	0.0105403	0.032221	up	K05391 cyclic nucleotide gated channel, plant | (RefSeq) cyclic nucleotide-gated ion channel 17-like (A)	ko04626: Plant-pathogen interaction
TraesCS6D02G322300	-3.42368	5.01707e-16	2.17122e-14	down	K13993 HSP20 family protein | (RefSeq) 18.6 kDa class III heat shock protein-like (A)	ko04141: Protein processing in endoplasmic reticulum
TraesCS6D02G313100	1.48379	0.00108866	0.00480859	up	K00366 ferredoxin-nitrite reductase [EC:1.7.7.1] | (RefSeq) ferredoxin--nitrite reductase, chloroplastic-like (A)	ko00910: Nitrogen metabolism; ko01100: Metabolic pathways
TraesCS6D02G310700	1.42585	0.0144539	0.0417078	up	K05278 flavonol synthase [EC:1.14.20.6] | (RefSeq) flavonol synthase/flavanone 3-hydroxylase-like (A)	ko00941: Flavonoid biosynthesis; ko01100: Metabolic pathways; ko01110: Biosynthesis of secondary metabolites
TraesCS6D02G310500	3.21731	0.0138181	0.0401898	up	K22706 (R)-mandelonitrile beta-glucosyltransferase [EC:2.4.1.354] | (RefSeq) 7-deoxyloganetin glucosyltransferase-like (A)	ko00460: Cyanoamino acid metabolism; ko01100: Metabolic pathways; ko01110: Biosynthesis of secondary metabolites
TraesCS6D02G306200	1.46628	0.000116597	0.000691593	up	K01191 alpha-mannosidase [EC:3.2.1.24] | (RefSeq) alpha-mannosidase At3g26720-like (A)	ko00511: Other glycan degradation
TraesCS6D02G305000	-2.10892	0.00346923	0.0128484	down	K19891 glucan endo-1,3-beta-glucosidase 1/2/3 [EC:3.2.1.39] | (RefSeq) hypothetical protein (A)	ko00500: Starch and sucrose metabolism; ko01100: Metabolic pathways
TraesCS6D02G303000	4.61945	2.75768e-10	5.45317e-09	up	K11866 STAM-binding protein [EC:3.4.19.12] | (RefSeq) AMSH-like ubiquitin thioesterase 3 (A)	ko04144: Endocytosis
TraesCS6D02G302300	1.18225	8.71781e-05	0.000537106	up	K05894 12-oxophytodienoic acid reductase [EC:1.3.1.42] | (RefSeq) putative 12-oxophytodienoate reductase 11 (A)	ko00592: alpha-Linolenic acid metabolism; ko01100: Metabolic pathways; ko01110: Biosynthesis of secondary metabolites
TraesCS6D02G298500	6.9399	1.07413e-12	3.04803e-11	up	K01176 alpha-amylase [EC:3.2.1.1] | (RefSeq) alpha-amylase type B isozyme-like (A)	ko00500: Starch and sucrose metabolism; ko01100: Metabolic pathways; ko01110: Biosynthesis of secondary metabolites
TraesCS6D02G296900	1.96969	5.14716e-05	0.00033786	up	K23452 UDP-glucosyltransferase 85A [EC:2.4.1.-] | (RefSeq) UDP-glycosyltransferase 85A2-like (A)	ko00908: Zeatin biosynthesis; ko01110: Biosynthesis of secondary metabolites
TraesCS6D02G296400	-4.49381	7.26 × 10-38	2.06 × 10-35	down	K00020 3-hydroxyisobutyrate dehydrogenase [EC:1.1.1.31] | (GenBank) 6-phosphogluconate dehydrogenase-like protein (A)	ko00280: Valine, leucine and isoleucine degradation; ko01100: Metabolic pathways
TraesCS6D02G296300	-7.70512	1.05154e-07	1.29639e-06	down	K00020 3-hydroxyisobutyrate dehydrogenase [EC:1.1.1.31] | (GenBank) 6-phosphogluconate dehydrogenase-like protein (A)	ko00280: Valine, leucine and isoleucine degradation; ko01100: Metabolic pathways
TraesCS6D02G296200	-5.65347	6.13 × 10-22	4.97 × 10-20	down	K00020 3-hydroxyisobutyrate dehydrogenase [EC:1.1.1.31] | (GenBank) 6-phosphogluconate dehydrogenase-like protein (A)	ko00280: Valine, leucine and isoleucine degradation; ko01100: Metabolic pathways
TraesCS6D02G296100	-9.6317	1.09138e-08	1.62342e-07	down	K00020 3-hydroxyisobutyrate dehydrogenase [EC:1.1.1.31] | (GenBank) 6-phosphogluconate dehydrogenase-like protein (A)	ko00280: Valine, leucine and isoleucine degradation; ko01100: Metabolic pathways
TraesCS6D02G295500	-3.8076	5.70 × 10-29	8.15 × 10-27	down	K13993 HSP20 family protein | (RefSeq) 24.1 kDa heat shock protein, mitochondrial-like isoform X1 (A)	ko04141: Protein processing in endoplasmic reticulum
TraesCS6D02G291900	2.14412	3.9651e-07	4.35152e-06	up	K14489 arabidopsis histidine kinase 2/3/4 (cytokinin receptor) [EC:2.7.13.3] | (RefSeq) probable histidine kinase 4 (A)	ko04075: Plant hormone signal transduction
TraesCS6D02G291800	-1.72171	3.1552e-06	2.82227e-05	down	K01179 endoglucanase [EC:3.2.1.4] | (RefSeq) endoglucanase 2-like (A)	ko00500: Starch and sucrose metabolism; ko01100: Metabolic pathways
TraesCS6D02G290700	1.50834	1.63001e-09	2.81984e-08	up	K14012 UBX domain-containing protein 1 | (RefSeq) ATPase family gene 2 protein (A)	ko04141: Protein processing in endoplasmic reticulum
TraesCS6D02G288800	-2.49017	2.49768e-14	8.89487e-13	down	K15639 PHYB activation tagged suppressor 1 [EC:1.14.-.-] | (RefSeq) cytochrome P450 734A1-like (A)	ko00905: Brassinosteroid biosynthesis; ko01110: Biosynthesis of secondary metabolites
TraesCS6D02G281600	-2.42378	4.11463e-10	7.88576e-09	down	K15920 xylan 1,4-beta-xylosidase [EC:3.2.1.37] | (RefSeq) hypothetical protein (A)	ko00520: Amino sugar and nucleotide sugar metabolism; ko01100: Metabolic pathways
TraesCS6D02G280900	-1.33945	0.00772162	0.0249912	down	K14500 BR-signaling kinase [EC:2.7.11.1] | (RefSeq) uncharacterized protein LOC108834630 (A)	ko04075: Plant hormone signal transduction
TraesCS6D02G278200	1.55717	3.41354e-15	1.33962e-13	up	K17212 bisdemethoxycurcumin synthase [EC:2.3.1.211] | (RefSeq) bisdemethoxycurcumin synthase-like (A)	ko00945: Stilbenoid, diarylheptanoid and gingerol biosynthesis; ko01110: Biosynthesis of secondary metabolites
TraesCS6D02G277300	-1.95276	9.27955e-08	1.15595e-06	down	K00799 glutathione S-transferase [EC:2.5.1.18] | (RefSeq) glutathione S-transferase F12-like (A)	ko00480: Glutathione metabolism; ko01100: Metabolic pathways
TraesCS6D02G274500	-3.82572	2.75917e-10	5.4541e-09	down	K10260 F-box and WD-40 domain protein 7 | (RefSeq) uncharacterized protein (A)	ko04120: Ubiquitin mediated proteolysis
TraesCS6D02G266900	1.14197	3.05521e-06	2.74615e-05	up	K03012 DNA-directed RNA polymerase II subunit RPB4 | (RefSeq) DNA-directed RNA polymerases IV and V subunit 4-like isoform X1 (A)	ko03020: RNA polymerase
TraesCS6D02G266500	1.08566	5.22201e-06	4.46278e-05	up	K12616 enhancer of mRNA-decapping protein 4 | (RefSeq) enhancer of mRNA-decapping protein 4-like (A)	ko03018: RNA degradation
TraesCS6D02G263100	1.26434	1.55849e-07	1.85748e-06	up	K01555 fumarylacetoacetase [EC:3.7.1.2] | (RefSeq) fumarylacetoacetase-like (A)	ko00350: Tyrosine metabolism; ko01100: Metabolic pathways
TraesCS6D02G261000	4.84427	5.38131e-15	2.06786e-13	up	K10256 omega-6 fatty acid desaturase / acyl-lipid omega-6 desaturase (Delta-12 desaturase) [EC:1.14.19.6 1.14.19.22] | (RefSeq) fatty acid desaturase DES2-like (A)	ko01040: Biosynthesis of unsaturated fatty acids; ko01100: Metabolic pathways; ko01212: Fatty acid metabolism
TraesCS6D02G260900	6.22707	5.60 × 10-32	9.63 × 10-30	up	K10256 omega-6 fatty acid desaturase / acyl-lipid omega-6 desaturase (Delta-12 desaturase) [EC:1.14.19.6 1.14.19.22] | (RefSeq) fatty acid desaturase DES2-like (A)	ko01040: Biosynthesis of unsaturated fatty acids; ko01100: Metabolic pathways; ko01212: Fatty acid metabolism
TraesCS6D02G254800	-1.60447	0.00298058	0.0112919	down	K01087 trehalose 6-phosphate phosphatase [EC:3.1.3.12] | (RefSeq) trehalose-phosphate phosphatase A (A)	ko00500: Starch and sucrose metabolism; ko01100: Metabolic pathways; ko01110: Biosynthesis of secondary metabolites
TraesCS6D02G254500	1.32682	9.69351e-08	1.20303e-06	up	K00876 uridine kinase [EC:2.7.1.48] | (RefSeq) uridine-cytidine kinase C-like (A)	ko00240: Pyrimidine metabolism; ko01100: Metabolic pathways; ko01232: Nucleotide metabolism
TraesCS6D02G251000	1.38079	4.82097e-09	7.70693e-08	up	K01438 acetylornithine deacetylase [EC:3.5.1.16] | (RefSeq) acetylornithine deacetylase-like (A)	ko00220: Arginine biosynthesis; ko01100: Metabolic pathways; ko01110: Biosynthesis of secondary metabolites; ko01210: 2-Oxocarboxylic acid metabolism; ko01230: Biosynthesis of amino acids
TraesCS6D02G248600	-2.9278	0.000671944	0.0031909	down	K08770 ubiquitin C | (RefSeq) polyubiquitin-like (A)	ko04120: Ubiquitin mediated proteolysis
TraesCS6D02G243800	1.54072	1.23578e-05	9.59525e-05	up	K09843 (+)-abscisic acid 8'-hydroxylase [EC:1.14.14.137] | (RefSeq) abscisic acid 8'-hydroxylase 1 (A)	ko00906: Carotenoid biosynthesis; ko01110: Biosynthesis of secondary metabolites
TraesCS6D02G240100	2.5265	5.42558e-14	1.84497e-12	up	K13429 chitin elicitor receptor kinase 1 | (RefSeq) lysM domain receptor-like kinase 3 (A)	ko04626: Plant-pathogen interaction
TraesCS6D02G239800	-1.5923	0.000219441	0.00120463	down	K12133 MYB-related transcription factor LHY | (RefSeq) uncharacterized protein LOC112280611 (A)	ko04712: Circadian rhythm - plant
TraesCS6D02G239700	1.12527	0.0011287	0.00495762	up	K01770 2-C-methyl-D-erythritol 2,4-cyclodiphosphate synthase [EC:4.6.1.12] | (RefSeq) 2-C-methyl-D-erythritol 2,4-cyclodiphosphate synthase, chloroplastic (A)	ko00900: Terpenoid backbone biosynthesis; ko01100: Metabolic pathways; ko01110: Biosynthesis of secondary metabolites
TraesCS6D02G230100	-1.01644	0.00130336	0.00559613	down	K00789 S-adenosylmethionine synthetase [EC:2.5.1.6] | (RefSeq) S-adenosylmethionine synthase 3 (A)	ko00270: Cysteine and methionine metabolism; ko00999: Biosynthesis of various plant secondary metabolites; ko01100: Metabolic pathways; ko01110: Biosynthesis of secondary metabolites; ko01230: Biosynthesis of amino acids; ko01240: Biosynthesis of cofactors
TraesCS6D02G230000	-1.56216	3.66957e-08	4.95294e-07	down	K00789 S-adenosylmethionine synthetase [EC:2.5.1.6] | (RefSeq) S-adenosylmethionine synthase 2 (A)	ko00270: Cysteine and methionine metabolism; ko00999: Biosynthesis of various plant secondary metabolites; ko01100: Metabolic pathways; ko01110: Biosynthesis of secondary metabolites; ko01230: Biosynthesis of amino acids; ko01240: Biosynthesis of cofactors
TraesCS6D02G227200	-4.02139	3.00758e-06	2.7088e-05	down	K15398 fatty acid omega-hydroxylase [EC:1.14.-.-] | (RefSeq) cytochrome P450 86A2-like (A)	ko00073: Cutin, suberine and wax biosynthesis; ko01100: Metabolic pathways
TraesCS6D02G226500	-1.60439	0.0120634	0.0360146	down	K13420 LRR receptor-like serine/threonine-protein kinase FLS2 [EC:2.7.11.1] | (RefSeq) LRR receptor-like serine/threonine-protein kinase FLS2 (A)	ko04016: MAPK signaling pathway - plant; ko04626: Plant-pathogen interaction
TraesCS6D02G226300	1.26365	0.000552219	0.00269583	up	K04715 ceramide kinase [EC:2.7.1.138] | (RefSeq) ceramide kinase isoform X1 (A)	ko00600: Sphingolipid metabolism; ko01100: Metabolic pathways
TraesCS6D02G224700	-1.47336	1.78012e-11	4.27565e-10	down	K16818 phospholipase A1 [EC:3.1.1.32] | (RefSeq) phospholipase A(1) DAD1, chloroplastic-like (A)	ko00564: Glycerophospholipid metabolism; ko00592: alpha-Linolenic acid metabolism; ko01100: Metabolic pathways; ko01110: Biosynthesis of secondary metabolites
TraesCS6D02G221700	2.38966	6.4615e-10	1.19814e-08	up	K01179 endoglucanase [EC:3.2.1.4] | (RefSeq) endoglucanase 23-like (A)	ko00500: Starch and sucrose metabolism; ko01100: Metabolic pathways
TraesCS6D02G221200	1.49275	0.00141831	0.0060273	up	K08331 autophagy-related protein 13 | (RefSeq) autophagy-related protein 13a (A)	ko04136: Autophagy - other
TraesCS6D02G220300	-2.27672	3.88441e-13	1.17388e-11	down	K20222 importin-5 | (RefSeq) importin-5-like isoform X1 (A)	ko03013: Nucleocytoplasmic transport
TraesCS6D02G220200	1.44193	3.43219e-05	0.000236095	up	K13667 EGF-domain serine glucosyl/xylosyltransferase [EC:2.4.1.376 2.4.2.63] | (RefSeq) O-glucosyltransferase rumi (A)	ko00514: Other types of O-glycan biosynthesis
TraesCS6D02G218600	3.19771	3.41848e-06	3.03594e-05	up	K10666 E3 ubiquitin-protein ligase RNF5 [EC:2.3.2.27] | (RefSeq) E3 ubiquitin-protein ligase RMA1H1-like (A)	ko04141: Protein processing in endoplasmic reticulum
TraesCS6D02G217600	1.43315	9.83654e-06	7.84255e-05	up	K12200 programmed cell death 6-interacting protein | (RefSeq) ALG-2 interacting protein X-like (A)	ko03250: Viral life cycle - HIV-1; ko04144: Endocytosis
TraesCS6D02G216600	-1.67727	0.000120272	0.000710473	down	K09291 nucleoprotein TPR | (RefSeq) LOW QUALITY PROTEIN: nuclear-pore anchor (A)	ko03013: Nucleocytoplasmic transport
TraesCS6D02G215300	1.36395	7.05886e-09	1.09475e-07	up	K13035 beta-cyano-L-alanine hydratase/nitrilase [EC:3.5.5.4 4.2.1.65] | (RefSeq) bifunctional nitrilase/nitrile hydratase NIT4-like (A)	ko00460: Cyanoamino acid metabolism; ko01100: Metabolic pathways; ko01110: Biosynthesis of secondary metabolites
TraesCS6D02G213800	-1.1253	0.000191047	0.00106861	down	K12489 Arf-GAP with coiled-coil, ANK repeat and PH domain-containing protein | (RefSeq) ADP-ribosylation factor GTPase-activating protein AGD2-like (A)	ko04144: Endocytosis
TraesCS6D02G208900	-2.37587	0.000526586	0.00258722	down	K14488 SAUR family protein | (RefSeq) auxin-responsive protein SAUR32 (A)	ko04075: Plant hormone signal transduction
TraesCS6D02G208500	1.90975	5.95843e-12	1.52715e-10	up	K15404 aldehyde decarbonylase [EC:4.1.99.5] | (RefSeq) protein ECERIFERUM 1-like (A)	ko00073: Cutin, suberine and wax biosynthesis; ko01110: Biosynthesis of secondary metabolites
TraesCS6D02G203200	1.24637	7.13233e-06	5.89658e-05	up	K00550 phosphatidyl-N-methylethanolamine N-methyltransferase [EC:2.1.1.71] | (RefSeq) phosphatidyl-N-methylethanolamine N-methyltransferase (A)	ko00564: Glycerophospholipid metabolism; ko01100: Metabolic pathways; ko01110: Biosynthesis of secondary metabolites
TraesCS6D02G202500	-1.28955	0.00432706	0.0154437	down	K01611 S-adenosylmethionine decarboxylase [EC:4.1.1.50] | (RefSeq) S-adenosylmethionine decarboxylase proenzyme-like (A)	ko00270: Cysteine and methionine metabolism; ko00330: Arginine and proline metabolism; ko01100: Metabolic pathways
TraesCS6D02G202000	-1.411	0.00130636	0.00560678	down	K12135 zinc finger protein CONSTANS | (RefSeq) zinc finger protein CONSTANS-LIKE 2-like (A)	ko04712: Circadian rhythm - plant
TraesCS6D02G199700	-1.61981	1.05161e-07	1.29639e-06	down	K05681 ATP-binding cassette, subfamily G (WHITE), member 2 | (RefSeq) hypothetical protein (A)	ko02010: ABC transporters
TraesCS6D02G199600	-1.11661	1.77964e-05	0.000132452	down	K07407 alpha-galactosidase [EC:3.2.1.22] | (RefSeq) alpha-galactosidase-like precursor (A)	ko00052: Galactose metabolism; ko00561: Glycerolipid metabolism; ko00600: Sphingolipid metabolism; ko00603: Glycosphingolipid biosynthesis - globo and isoglobo series; ko01100: Metabolic pathways
TraesCS6D02G199200	-1.2905	1.78086e-08	2.54565e-07	down	K01179 endoglucanase [EC:3.2.1.4] | (RefSeq) endoglucanase 23-like (A)	ko00500: Starch and sucrose metabolism; ko01100: Metabolic pathways
TraesCS6D02G197800	1.03087	0.00346547	0.0128398	up	K03526 (E)-4-hydroxy-3-methylbut-2-enyl-diphosphate synthase [EC:1.17.7.1 1.17.7.3] | (RefSeq) 4-hydroxy-3-methylbut-2-en-1-yl diphosphate synthase (ferredoxin), chloroplastic-like (A)	ko00900: Terpenoid backbone biosynthesis; ko01100: Metabolic pathways; ko01110: Biosynthesis of secondary metabolites
TraesCS6D02G196300	-1.15864	7.65791e-06	6.27196e-05	down	K00134 glyceraldehyde 3-phosphate dehydrogenase (phosphorylating) [EC:1.2.1.12] | (RefSeq) glyceraldehyde-3-phosphate dehydrogenase 2, cytosolic (A)	ko00010: Glycolysis / Gluconeogenesis; ko00710: Carbon fixation in photosynthetic organisms; ko01100: Metabolic pathways; ko01110: Biosynthesis of secondary metabolites; ko01200: Carbon metabolism; ko01230: Biosynthesis of amino acids
TraesCS6D02G193600	-4.76504	4.41664e-25	4.55195e-23	down	K15402 fatty acid omega-hydroxylase [EC:1.14.-.-] | (RefSeq) cytochrome P450 86B1 (A)	ko00073: Cutin, suberine and wax biosynthesis
TraesCS6D02G192500	-1.4378	6.75754e-09	1.05269e-07	down	K00737 beta-1,4-mannosyl-glycoprotein beta-1,4-N-acetylglucosaminyltransferase [EC:2.4.1.144] | (RefSeq) beta-1,4-mannosyl-glycoprotein 4-beta-N-acetylglucosaminyltransferase-like (A)	ko00510: N-Glycan biosynthesis; ko01100: Metabolic pathways
TraesCS6D02G191500	1.94195	0.00017335	0.000980823	up	K01176 alpha-amylase [EC:3.2.1.1] | (RefSeq) alpha-amylase isozyme 2A (A)	ko00500: Starch and sucrose metabolism; ko01100: Metabolic pathways; ko01110: Biosynthesis of secondary metabolites
TraesCS6D02G191400	4.63726	7.34015e-06	6.04689e-05	up	K01176 alpha-amylase [EC:3.2.1.1] | (RefSeq) alpha-amylase isozyme 2A (A)	ko00500: Starch and sucrose metabolism; ko01100: Metabolic pathways; ko01110: Biosynthesis of secondary metabolites
TraesCS6D02G189400	-1.36359	0.00250516	0.0097512	down	K08243 chalcone reductase | (RefSeq) NAD(P)H-dependent 6'-deoxychalcone synthase isoform X1 (A)	ko00941: Flavonoid biosynthesis; ko01100: Metabolic pathways; ko01110: Biosynthesis of secondary metabolites
TraesCS6D02G189300	-2.35171	1.73136e-11	4.16788e-10	down	K01126 glycerophosphoryl diester phosphodiesterase [EC:3.1.4.46] | (RefSeq) glycerophosphodiester phosphodiesterase GDPD6 (A)	ko00564: Glycerophospholipid metabolism
TraesCS6D02G188600	1.01403	0.00149124	0.00628183	up	K11087 small nuclear ribonucleoprotein D1 | (RefSeq) small nuclear ribonucleoprotein Sm D1-like isoform X1 (A)	ko03040: Spliceosome
TraesCS6D02G186800	1.35975	6.1369e-05	0.000393693	up	K13457 disease resistance protein RPM1 | (RefSeq) uncharacterized protein sll1770 (A)	ko04626: Plant-pathogen interaction
TraesCS6D02G186000	-1.09538	0.00150639	0.00633481	down	K05285 GPI ethanolamine phosphate transferase 1 [EC:2.7.-.-] | (RefSeq) GPI ethanolamine phosphate transferase 1 (A)	ko00563: Glycosylphosphatidylinositol (GPI)-anchor biosynthesis; ko01100: Metabolic pathways
TraesCS6D02G185600	1.22927	7.41097e-09	1.14372e-07	up	K12275 translocation protein SEC62 | (RefSeq) uncharacterized protein LOC109779261 (A)	ko03060: Protein export; ko04141: Protein processing in endoplasmic reticulum
TraesCS6D02G183900	1.19156	1.65585e-05	0.000124119	up	K03884 NADH-ubiquinone oxidoreductase chain 6 [EC:7.1.1.2] | (RefSeq) uncharacterized protein LOC109243048 (A)	ko00190: Oxidative phosphorylation; ko01100: Metabolic pathways
TraesCS6D02G181100	-1.60842	0.00068696	0.00325124	down	K05391 cyclic nucleotide gated channel, plant | (RefSeq) cyclic nucleotide-gated ion channel 1-like (A)	ko04626: Plant-pathogen interaction
TraesCS6D02G178300	-1.16204	8.82932e-06	7.11802e-05	down	K04354 serine/threonine-protein phosphatase 2A regulatory subunit B | (RefSeq) serine/threonine protein phosphatase 2A 55 kDa regulatory subunit B beta isoform isoform X1 (A)	ko03015: mRNA surveillance pathway
TraesCS6D02G176900	1.23135	1.6175e-08	2.32894e-07	up	K06689 ubiquitin-conjugating enzyme E2 D [EC:2.3.2.23] | (RefSeq) ubiquitin-conjugating enzyme E2 E2-like (A)	ko04120: Ubiquitin mediated proteolysis; ko04141: Protein processing in endoplasmic reticulum
TraesCS6D02G173600	-2.71652	0.001058	0.00469453	down	K13412 calcium-dependent protein kinase [EC:2.7.11.1] | (RefSeq) calcium-dependent protein kinase 17-like (A)	ko04626: Plant-pathogen interaction
TraesCS6D02G171400	1.07665	7.92002e-08	1.00081e-06	up	K04382 serine/threonine-protein phosphatase 2A catalytic subunit [EC:3.1.3.16] | (RefSeq) serine/threonine-protein phosphatase PP2A-3 catalytic subunit (A)	ko03015: mRNA surveillance pathway; ko04136: Autophagy - other
TraesCS6D02G171200	-2.40697	0.000236067	0.00128626	down	K13437 receptor kinase-like protein | (RefSeq) probable LRR receptor-like serine/threonine-protein kinase At3g47570 (A)	ko04626: Plant-pathogen interaction
TraesCS6D02G169100	-5.09114	3.9 × 10-85	2.6 × 10-83	down	K13993 HSP20 family protein | (RefSeq) 23.6 kDa heat shock protein, mitochondrial-like (A)	ko04141: Protein processing in endoplasmic reticulum
TraesCS6D02G167800	-2.42343	0.00417692	0.0149908	down	K16241 transcription factor HY5 | (RefSeq) transcription factor HY5-like (A)	ko04712: Circadian rhythm - plant
TraesCS6D02G166600	-1.28885	0.000240304	0.0013061	down	K15397 3-ketoacyl-CoA synthase [EC:2.3.1.199] | (RefSeq) 3-ketoacyl-CoA synthase 11-like (A)	ko00062: Fatty acid elongation; ko01100: Metabolic pathways; ko01110: Biosynthesis of secondary metabolites; ko04626: Plant-pathogen interaction
TraesCS6D02G166100	1.54288	0.000168743	0.00095737	up	K08711 ATP-binding cassette, subfamily G (WHITE), member 2, PDR | (RefSeq) LOW QUALITY PROTEIN: ZEB2-regulated ABC transporter 1-like (A)	ko02010: ABC transporters
TraesCS6D02G165900	1.63615	0.000263939	0.00141673	up	K02209 DNA replication licensing factor MCM5 [EC:5.6.2.3] | (RefSeq) LOW QUALITY PROTEIN: uncharacterized protein LOC116110854 (A)	ko03030: DNA replication
TraesCS6D02G164000	2.06658	3.67632e-06	3.24392e-05	up	K15472 premnaspirodiene oxygenase [EC:1.14.14.151] | (RefSeq) premnaspirodiene oxygenase (A)	ko00909: Sesquiterpenoid and triterpenoid biosynthesis; ko01110: Biosynthesis of secondary metabolites
TraesCS6D02G162700	-2.97252	1.80 × 10-35	4.25 × 10-33	down	K23279 gallate 1-beta-glucosyltransferase [EC:2.4.1.136] | (RefSeq) gallate 1-beta-glucosyltransferase-like isoform X1 (A)	ko00999: Biosynthesis of various plant secondary metabolites
TraesCS6D02G161000	-3.10655	1.70189e-17	8.53978e-16	down	K06443 lycopene beta-cyclase [EC:5.5.1.19] | (RefSeq) lycopene beta cyclase, chloroplastic (A)	ko00906: Carotenoid biosynthesis; ko01100: Metabolic pathways; ko01110: Biosynthesis of secondary metabolites
TraesCS6D02G160100	1.2062	3.17937e-05	0.000220777	up	K11583 serine/threonine-protein phosphatase 2A regulatory subunit B'' | (RefSeq) probable serine/threonine protein phosphatase 2A regulatory subunit B''delta (A)	ko03015: mRNA surveillance pathway
TraesCS6D02G159300	2.26121	2.75282e-06	2.50422e-05	up	K17906 autophagy-related protein 2 | (RefSeq) autophagy-related protein 2-like (A)	ko04136: Autophagy - other
TraesCS6D02G157800	-2.34939	1.90723e-05	0.00014087	down	K13429 chitin elicitor receptor kinase 1 | (RefSeq) lysM domain receptor-like kinase 3 (A)	ko04626: Plant-pathogen interaction
TraesCS6D02G155300	2.10675	0.00187972	0.00764261	up	K00963 UTP--glucose-1-phosphate uridylyltransferase [EC:2.7.7.9] | (RefSeq) UTP--glucose-1-phosphate uridylyltransferase-like (A)	ko00040: Pentose and glucuronate interconversions; ko00052: Galactose metabolism; ko00500: Starch and sucrose metabolism; ko00520: Amino sugar and nucleotide sugar metabolism; ko01100: Metabolic pathways; ko01110: Biosynthesis of secondary metabolites; ko01240: Biosynthesis of cofactors; ko01250: Biosynthesis of nucleotide sugars
TraesCS6D02G153600	1.26764	5.36897e-06	4.57376e-05	up	K17686 P-type Cu+ transporter [EC:7.2.2.8] | (RefSeq) copper-transporting ATPase HMA4-like (A)	ko04016: MAPK signaling pathway - plant
TraesCS6D02G152800	-1.29586	0.0054365	0.0186673	down	K10615 E3 ubiquitin-protein ligase HERC4 [EC:2.3.2.26] | (RefSeq) probable E3 ubiquitin-protein ligase HERC4 isoform X1 (A)	ko04120: Ubiquitin mediated proteolysis
TraesCS6D02G152100	-2.05967	7.8405e-07	8.05896e-06	down	K13448 calcium-binding protein CML | (RefSeq) probable calcium-binding protein CML21 (A)	ko04626: Plant-pathogen interaction
TraesCS6D02G149100	-1.04071	0.0097917	0.0303188	down	K02433 aspartyl-tRNA(Asn)/glutamyl-tRNA(Gln) amidotransferase subunit A [EC:6.3.5.6 6.3.5.7] | (RefSeq) Glutamyl-tRNA(Gln) amidotransferase subunit A (A)	ko00970: Aminoacyl-tRNA biosynthesis; ko01100: Metabolic pathways
TraesCS6D02G142900	1.25107	0.000454291	0.00227699	up	K13436 pto-interacting protein 1 [EC:2.7.11.1] | (RefSeq) PTI1-like tyrosine-protein kinase 1 isoform X1 (A)	ko04626: Plant-pathogen interaction
TraesCS6D02G142800	-1.22972	0.00717183	0.0235437	down	K10583 ubiquitin-conjugating enzyme E2 S [EC:2.3.2.23] | (RefSeq) ubiquitin-conjugating enzyme E2 22-like isoform X1 (A)	ko04120: Ubiquitin mediated proteolysis
TraesCS6D02G142700	1.57001	8.13343e-16	3.43647e-14	up	K01489 cytidine deaminase [EC:3.5.4.5] | (RefSeq) cytidine deaminase 1-like (A)	ko00240: Pyrimidine metabolism; ko01100: Metabolic pathways; ko01232: Nucleotide metabolism
TraesCS6D02G142500	1.51255	0.01301	0.0382841	up	K10615 E3 ubiquitin-protein ligase HERC4 [EC:2.3.2.26] | (RefSeq) probable E3 ubiquitin-protein ligase HERC4 isoform X1 (A)	ko04120: Ubiquitin mediated proteolysis
TraesCS6D02G141700	-2.1216	4.4359e-14	1.52393e-12	down	K01904 4-coumarate--CoA ligase [EC:6.2.1.12] | (RefSeq) probable 4-coumarate--CoA ligase 3 (A)	ko00130: Ubiquinone and other terpenoid-quinone biosynthesis; ko00940: Phenylpropanoid biosynthesis; ko01100: Metabolic pathways; ko01110: Biosynthesis of secondary metabolites
TraesCS6D02G139700	2.82004	6.33657e-09	9.94259e-08	up	K15404 aldehyde decarbonylase [EC:4.1.99.5] | (RefSeq) protein ECERIFERUM 3-like (A)	ko00073: Cutin, suberine and wax biosynthesis; ko01110: Biosynthesis of secondary metabolites
TraesCS6D02G138200	-5.5918	8.4138e-10	1.52509e-08	down	K05278 flavonol synthase [EC:1.14.20.6] | (RefSeq) flavonol synthase/flavanone 3-hydroxylase (A)	ko00941: Flavonoid biosynthesis; ko01100: Metabolic pathways; ko01110: Biosynthesis of secondary metabolites
TraesCS6D02G136700	-3.63879	6.30819e-08	8.10728e-07	down	K01850 chorismate mutase [EC:5.4.99.5] | (RefSeq) chorismate mutase 2 (A)	ko00400: Phenylalanine, tyrosine and tryptophan biosynthesis; ko01100: Metabolic pathways; ko01110: Biosynthesis of secondary metabolites; ko01230: Biosynthesis of amino acids
TraesCS6D02G136000	-1.11913	0.000409961	0.0020829	down	K14016 ubiquitin fusion degradation protein 1 | (RefSeq) ubiquitin fusion degradation protein 1 homolog (A)	ko04141: Protein processing in endoplasmic reticulum
TraesCS6D02G135900	-1.52464	5.6143e-05	0.000364144	down	K02149 V-type H+-transporting ATPase subunit D | (RefSeq) V-type proton ATPase subunit D-like (A)	ko00190: Oxidative phosphorylation; ko01100: Metabolic pathways; ko04145: Phagosome
TraesCS6D02G133400	2.08464	5.96238e-06	5.02803e-05	up	K15472 premnaspirodiene oxygenase [EC:1.14.14.151] | (RefSeq) premnaspirodiene oxygenase (A)	ko00909: Sesquiterpenoid and triterpenoid biosynthesis; ko01110: Biosynthesis of secondary metabolites
TraesCS6D02G131900	1.83595	0.00908777	0.028539	up	K05658 ATP-binding cassette, subfamily B (MDR/TAP), member 1 [EC:7.6.2.2] | (RefSeq) ABC transporter B family member 19-like (A)	ko02010: ABC transporters
TraesCS6D02G130800	2.18924	6.59 × 10-33	1.19871e-30	up	K00457 4-hydroxyphenylpyruvate dioxygenase [EC:1.13.11.27] | (RefSeq) 4-hydroxyphenylpyruvate dioxygenase (A)	ko00130: Ubiquinone and other terpenoid-quinone biosynthesis; ko00350: Tyrosine metabolism; ko00360: Phenylalanine metabolism; ko01100: Metabolic pathways; ko01240: Biosynthesis of cofactors
TraesCS6D02G129000	1.05381	9.96236e-06	7.92633e-05	up	K01942 biotin---protein ligase [EC:6.3.4.9 6.3.4.10 6.3.4.11 6.3.4.15] | (RefSeq) biotin--protein ligase 2-like (A)	ko00780: Biotin metabolism; ko01100: Metabolic pathways
TraesCS6D02G128900	2.13553	1.8836e-17	9.38119e-16	up	K01011 thiosulfate/3-mercaptopyruvate sulfurtransferase [EC:2.8.1.1 2.8.1.2] | (RefSeq) thiosulfate/3-mercaptopyruvate sulfurtransferase 1, mitochondrial-like (A)	ko00270: Cysteine and methionine metabolism; ko00920: Sulfur metabolism; ko01100: Metabolic pathways; ko04122: Sulfur relay system
TraesCS6D02G128600	-1.53722	9.19307e-05	0.000562243	down	K05681 ATP-binding cassette, subfamily G (WHITE), member 2 | (RefSeq) hypothetical protein (A)	ko02010: ABC transporters
TraesCS6D02G127500	1.34094	0.000174341	0.000985571	up	K13719 ubiquitin thioesterase OTU1 [EC:3.1.2.-] | (RefSeq) ubiquitin thioesterase OTU1 (A)	ko04141: Protein processing in endoplasmic reticulum
TraesCS6D02G119700	1.84794	1.67546e-05	0.000125448	up	K13223 indole-2-monooxygenase [EC:1.14.14.153] | (RefSeq) indole-2-monooxygenase-like (A)	ko00402: Benzoxazinoid biosynthesis; ko01110: Biosynthesis of secondary metabolites
TraesCS6D02G111700	1.53298	1.19414e-07	1.45268e-06	up	K01191 alpha-mannosidase [EC:3.2.1.24] | (RefSeq) alpha-mannosidase At3g26720-like (A)	ko00511: Other glycan degradation
TraesCS6D02G108400	-1.55844	3.09404e-11	7.17071e-10	down	K00430 peroxidase [EC:1.11.1.7] | (RefSeq) peroxidase P7-like (A)	ko00940: Phenylpropanoid biosynthesis; ko01100: Metabolic pathways; ko01110: Biosynthesis of secondary metabolites
TraesCS6D02G106000	2.44994	0.000417316	0.00211585	up	K01520 dUTP pyrophosphatase [EC:3.6.1.23] | (RefSeq) uncharacterized protein LOC109756322 (A)	ko00240: Pyrimidine metabolism; ko01100: Metabolic pathways; ko01232: Nucleotide metabolism
TraesCS6D02G105900	1.475	0.00610933	0.0206059	up	K01520 dUTP pyrophosphatase [EC:3.6.1.23] | (RefSeq) uncharacterized protein LOC109756322 (A)	ko00240: Pyrimidine metabolism; ko01100: Metabolic pathways; ko01232: Nucleotide metabolism
TraesCS6D02G104500	1.74055	0.00210782	0.00841084	up	K14488 SAUR family protein | (RefSeq) auxin-responsive protein SAUR50-like (A)	ko04075: Plant hormone signal transduction
TraesCS6D02G102400	1.17457	0.00677507	0.0224562	up	K12446 L-arabinokinase [EC:2.7.1.46] | (RefSeq) L-arabinokinase (A)	ko00520: Amino sugar and nucleotide sugar metabolism; ko01100: Metabolic pathways; ko01250: Biosynthesis of nucleotide sugars
TraesCS6D02G100900	-2.03395	1.47297e-06	1.42812e-05	down	K14486 auxin response factor | (RefSeq) auxin response factor 19-like isoform X1 (A)	ko04075: Plant hormone signal transduction
TraesCS6D02G094400	1.77076	1.31917e-14	4.85966e-13	up	K01510 apyrase [EC:3.6.1.5] | (RefSeq) probable apyrase 6 (A)	ko00230: Purine metabolism; ko00240: Pyrimidine metabolism; ko01100: Metabolic pathways; ko01110: Biosynthesis of secondary metabolites; ko01232: Nucleotide metabolism
TraesCS6D02G093800	1.75004	7.79545e-09	1.19581e-07	up	K01513 ectonucleotide pyrophosphatase/phosphodiesterase family member 1/3 [EC:3.1.4.1 3.6.1.9] | (RefSeq) uncharacterized protein LOC109769794 (A)	ko00230: Purine metabolism; ko00240: Pyrimidine metabolism; ko00500: Starch and sucrose metabolism; ko00740: Riboflavin metabolism; ko00760: Nicotinate and nicotinamide metabolism; ko00770: Pantothenate and CoA biosynthesis; ko01100: Metabolic pathways; ko01110: Biosynthesis of secondary metabolites; ko01232: Nucleotide metabolism
TraesCS6D02G090500	-1.07443	0.00163206	0.00677525	down	K13789 geranylgeranyl diphosphate synthase, type II [EC:2.5.1.1 2.5.1.10 2.5.1.29] | (RefSeq) geranylgeranyl pyrophosphate synthase 7, chloroplastic-like (A)	ko00900: Terpenoid backbone biosynthesis; ko01100: Metabolic pathways; ko01110: Biosynthesis of secondary metabolites
TraesCS6D02G090400	-1.51217	4.7298e-15	1.82669e-13	down	K08054 calnexin | (RefSeq) calnexin homolog (A)	ko04141: Protein processing in endoplasmic reticulum; ko04145: Phagosome
TraesCS6D02G090200	-1.72475	1.3255e-06	1.29879e-05	down	K08054 calnexin | (RefSeq) calnexin homolog (A)	ko04141: Protein processing in endoplasmic reticulum; ko04145: Phagosome
TraesCS6D02G085300	-1.18371	0.000218339	0.00119944	down	K02433 aspartyl-tRNA(Asn)/glutamyl-tRNA(Gln) amidotransferase subunit A [EC:6.3.5.6 6.3.5.7] | (RefSeq) Glutamyl-tRNA(Gln) amidotransferase subunit A (A)	ko00970: Aminoacyl-tRNA biosynthesis; ko01100: Metabolic pathways
TraesCS6D02G077600	1.28593	0.000911526	0.00413943	up	K03884 NADH-ubiquinone oxidoreductase chain 6 [EC:7.1.1.2] | (RefSeq) uncharacterized protein LOC109243048 (A)	ko00190: Oxidative phosphorylation; ko01100: Metabolic pathways
TraesCS6D02G074300	1.42229	6.25823e-13	1.83527e-11	up	K01703 3-isopropylmalate/(R)-2-methylmalate dehydratase large subunit [EC:4.2.1.33 4.2.1.35] | (RefSeq) 3-isopropylmalate dehydratase large subunit, chloroplastic (A)	ko00290: Valine, leucine and isoleucine biosynthesis; ko00660: C5-Branched dibasic acid metabolism; ko00966: Glucosinolate biosynthesis; ko01100: Metabolic pathways; ko01110: Biosynthesis of secondary metabolites; ko01210: 2-Oxocarboxylic acid metabolism; ko01230: Biosynthesis of amino acids
TraesCS6D02G072400	1.00944	0.0135861	0.0396141	up	K13335 peroxin-16 | (RefSeq) peroxisome biogenesis protein 16-like isoform X1 (A)	ko04146: Peroxisome
TraesCS6D02G065600	-2.03029	0.000150638	0.000866409	down	K01915 glutamine synthetase [EC:6.3.1.2] | (RefSeq) type-1 glutamine synthetase 1-like (A)	ko00220: Arginine biosynthesis; ko00250: Alanine, aspartate and glutamate metabolism; ko00630: Glyoxylate and dicarboxylate metabolism; ko00910: Nitrogen metabolism; ko01100: Metabolic pathways; ko01230: Biosynthesis of amino acids
TraesCS6D02G063500	1.30029	0.00121965	0.00529366	up	K01681 aconitate hydratase [EC:4.2.1.3] | (RefSeq) putative aconitate hydratase, cytoplasmic (A)	ko00020: Citrate cycle (TCA cycle); ko00630: Glyoxylate and dicarboxylate metabolism; ko01100: Metabolic pathways; ko01110: Biosynthesis of secondary metabolites; ko01200: Carbon metabolism; ko01210: 2-Oxocarboxylic acid metabolism; ko01230: Biosynthesis of amino acids
TraesCS6D02G057800	2.71982	2.73823e-14	9.66824e-13	up	K16084 ent-cassa-12,15-diene 11-hydroxylase / oryzalexin D synthase [EC:1.14.14.112 1.14.14.123] | (RefSeq) ent-cassadiene C11-alpha-hydroxylase 1-like (A)	ko00904: Diterpenoid biosynthesis; ko01110: Biosynthesis of secondary metabolites
TraesCS6D02G054900	-7.75143	1.537e-08	2.22261e-07	down	K00430 peroxidase [EC:1.11.1.7] | (RefSeq) peroxidase 70-like (A)	ko00940: Phenylpropanoid biosynthesis; ko01100: Metabolic pathways; ko01110: Biosynthesis of secondary metabolites
TraesCS6D02G051800	-2.22666	1.31866e-08	1.93353e-07	down	K01087 trehalose 6-phosphate phosphatase [EC:3.1.3.12] | (RefSeq) uncharacterized protein LOC119360763 (A)	ko00500: Starch and sucrose metabolism; ko01100: Metabolic pathways; ko01110: Biosynthesis of secondary metabolites
TraesCS6D02G049100	-1.90817	9.11175e-15	3.43231e-13	down	K09490 endoplasmic reticulum chaperone BiP [EC:3.6.4.10] | (RefSeq) luminal-binding protein 2 (A)	ko03060: Protein export; ko04141: Protein processing in endoplasmic reticulum
TraesCS6D02G041600	1.30224	9.25595e-08	1.15327e-06	up	K00167 2-oxoisovalerate dehydrogenase E1 component beta subunit [EC:1.2.4.4] | (RefSeq) 2-oxoisovalerate dehydrogenase subunit beta 1, mitochondrial-like (A)	ko00280: Valine, leucine and isoleucine degradation; ko00640: Propanoate metabolism; ko01100: Metabolic pathways; ko01110: Biosynthesis of secondary metabolites
TraesCS6D02G038600	6.84287	3.79936e-15	1.48125e-13	up	K13258 2-hydroxyisoflavanone dehydratase [EC:4.2.1.105] | (RefSeq) uncharacterized protein LOC115994703 (A)	ko00943: Isoflavonoid biosynthesis; ko01100: Metabolic pathways; ko01110: Biosynthesis of secondary metabolites
TraesCS6D02G038500	2.27247	7.73782e-21	5.63124e-19	up	K18054 2'-deoxymugineic-acid 2'-dioxygenase / mugineic-acid 3-dioxygenase [EC:1.14.11.24 1.14.11.25] | (RefSeq) 2'-deoxymugineic-acid 2'-dioxygenase-like (A)	ko00999: Biosynthesis of various plant secondary metabolites; ko01100: Metabolic pathways; ko01110: Biosynthesis of secondary metabolites
TraesCS6D02G030800	2.27125	0.00070554	0.00332652	up	K01681 aconitate hydratase [EC:4.2.1.3] | (RefSeq) putative aconitate hydratase, cytoplasmic (A)	ko00020: Citrate cycle (TCA cycle); ko00630: Glyoxylate and dicarboxylate metabolism; ko01100: Metabolic pathways; ko01110: Biosynthesis of secondary metabolites; ko01200: Carbon metabolism; ko01210: 2-Oxocarboxylic acid metabolism; ko01230: Biosynthesis of amino acids
TraesCS6D02G028300	1.52317	0.00399555	0.0144625	up	K13457 disease resistance protein RPM1 | (RefSeq) disease resistance protein RPM1 (A)	ko04626: Plant-pathogen interaction
TraesCS6D02G024600	1.00092	6.89249e-05	0.00043672	up	K00938 phosphomevalonate kinase [EC:2.7.4.2] | (RefSeq) uncharacterized protein LOC112702714 (A)	ko00900: Terpenoid backbone biosynthesis; ko01100: Metabolic pathways; ko01110: Biosynthesis of secondary metabolites
TraesCS6D02G021100	5.14719	8.52149e-18	4.45566e-16	up	K22706 (R)-mandelonitrile beta-glucosyltransferase [EC:2.4.1.354] | (RefSeq) 7-deoxyloganetin glucosyltransferase (A)	ko00460: Cyanoamino acid metabolism; ko01100: Metabolic pathways; ko01110: Biosynthesis of secondary metabolites
TraesCS6D02G017600	-1.79871	0.00531663	0.0183281	down	K13475 R protein MLA10 | (RefSeq) disease resistance protein RGA5-like isoform X1 (A)	ko04626: Plant-pathogen interaction
TraesCS6D02G001700	2.19749	5.60863e-06	4.76124e-05	up	K15893 glycerate dehydrogenase [EC:1.1.1.29] | (RefSeq) glycerate dehydrogenase (A)	ko00260: Glycine, serine and threonine metabolism; ko00630: Glyoxylate and dicarboxylate metabolism; ko01100: Metabolic pathways; ko01110: Biosynthesis of secondary metabolites; ko01200: Carbon metabolism
TraesCS6B02G462300	-2.00667	0.00210257	0.00839365	down	K00434 L-ascorbate peroxidase [EC:1.11.1.11] | (RefSeq) probable L-ascorbate peroxidase 8, chloroplastic (A)	ko00053: Ascorbate and aldarate metabolism; ko00480: Glutathione metabolism; ko01100: Metabolic pathways
TraesCS6B02G456400	1.22854	0.00249189	0.00971299	up	K00472 prolyl 4-hydroxylase [EC:1.14.11.2] | (RefSeq) probable prolyl 4-hydroxylase 3 (A)	ko00330: Arginine and proline metabolism; ko01100: Metabolic pathways
TraesCS6B02G433000	1.61861	0.000579903	0.00281224	up	K11752 diaminohydroxyphosphoribosylaminopyrimidine deaminase / 5-amino-6-(5-phosphoribosylamino)uracil reductase [EC:3.5.4.26 1.1.1.193] | (RefSeq) riboflavin biosynthesis protein PYRR, chloroplastic-like (A)	ko00740: Riboflavin metabolism; ko01100: Metabolic pathways; ko01110: Biosynthesis of secondary metabolites; ko01240: Biosynthesis of cofactors
TraesCS6B02G432200	-1.6126	0.0141534	0.0410001	down	K15747 beta-ring hydroxylase [EC:1.14.-.-] | (RefSeq) protein LUTEIN DEFICIENT 5, chloroplastic-like (A)	ko00906: Carotenoid biosynthesis; ko01100: Metabolic pathways; ko01110: Biosynthesis of secondary metabolites
TraesCS6B02G425900	1.14393	0.01292	0.0380849	up	K13430 serine/threonine-protein kinase PBS1 [EC:2.7.11.1] | (RefSeq) serine/threonine-protein kinase PBS1 (A)	ko04626: Plant-pathogen interaction
TraesCS6B02G422900	-9.18352	3.40754e-13	1.03798e-11	down	K15397 3-ketoacyl-CoA synthase [EC:2.3.1.199] | (RefSeq) 3-ketoacyl-CoA synthase 12-like (A)	ko00062: Fatty acid elongation; ko01100: Metabolic pathways; ko01110: Biosynthesis of secondary metabolites; ko04626: Plant-pathogen interaction
TraesCS6B02G420200	-2.9344	0.00694895	0.0229331	down	K09753 cinnamoyl-CoA reductase [EC:1.2.1.44] | (RefSeq) cinnamoyl-CoA reductase 1-like (A)	ko00940: Phenylpropanoid biosynthesis; ko01100: Metabolic pathways; ko01110: Biosynthesis of secondary metabolites
TraesCS6B02G420000	1.33974	0.0010616	0.00470828	up	K09753 cinnamoyl-CoA reductase [EC:1.2.1.44] | (RefSeq) cinnamoyl-CoA reductase 1-like (A)	ko00940: Phenylpropanoid biosynthesis; ko01100: Metabolic pathways; ko01110: Biosynthesis of secondary metabolites
TraesCS6B02G415600	-1.17913	0.00282654	0.0107994	down	K12608 CCR4-NOT complex subunit CAF16 | (RefSeq) ABC transporter I family member 19-like (A)	ko03018: RNA degradation
TraesCS6B02G412900	2.50649	0.000447488	0.00224626	up	K13065 shikimate O-hydroxycinnamoyltransferase [EC:2.3.1.133] | (RefSeq) agmatine coumaroyltransferase-2-like (A)	ko00940: Phenylpropanoid biosynthesis; ko00941: Flavonoid biosynthesis; ko00945: Stilbenoid, diarylheptanoid and gingerol biosynthesis; ko01100: Metabolic pathways; ko01110: Biosynthesis of secondary metabolites
TraesCS6B02G412300	-1.80724	4.09305e-11	9.28486e-10	down	K00020 3-hydroxyisobutyrate dehydrogenase [EC:1.1.1.31] | (RefSeq) probable 3-hydroxyisobutyrate dehydrogenase-like 2, mitochondrial (A)	ko00280: Valine, leucine and isoleucine degradation; ko01100: Metabolic pathways
TraesCS6B02G411000	1.65123	3.03518e-08	4.17787e-07	up	K14484 auxin-responsive protein IAA | (RefSeq) auxin-responsive protein IAA9-like (A)	ko04075: Plant hormone signal transduction
TraesCS6B02G406900	-1.42036	0.00287513	0.0109506	down	K01455 formamidase [EC:3.5.1.49] | (RefSeq) formamidase-like (A)	ko00460: Cyanoamino acid metabolism; ko00630: Glyoxylate and dicarboxylate metabolism; ko00910: Nitrogen metabolism; ko01100: Metabolic pathways; ko01200: Carbon metabolism
TraesCS6B02G393000	1.23356	0.0100074	0.0308814	up	K08333 phosphoinositide-3-kinase, regulatory subunit 4 [EC:2.7.11.1] | (RefSeq) serine/threonine-protein kinase VPS15-like (A)	ko04136: Autophagy - other
TraesCS6B02G388800	-2.41866	8.23268e-06	6.6864e-05	down	K13475 R protein MLA10 | (RefSeq) disease resistance protein RGA5-like isoform X1 (A)	ko04626: Plant-pathogen interaction
TraesCS6B02G385900	-1.5544	6.86684e-06	5.70353e-05	down	K08679 UDP-glucuronate 4-epimerase [EC:5.1.3.6] | (RefSeq) UDP-glucuronate 4-epimerase 1-like (A)	ko00053: Ascorbate and aldarate metabolism; ko00520: Amino sugar and nucleotide sugar metabolism; ko01100: Metabolic pathways; ko01240: Biosynthesis of cofactors; ko01250: Biosynthesis of nucleotide sugars
TraesCS6B02G382300	1.37206	0.000551067	0.00269119	up	K05391 cyclic nucleotide gated channel, plant | (RefSeq) cyclic nucleotide-gated ion channel 17-like (A)	ko04626: Plant-pathogen interaction
TraesCS6B02G376700	5.51125	2.17098e-19	1.37427e-17	up	K14514 ethylene-insensitive protein 3 | (RefSeq) putative ETHYLENE INSENSITIVE 3-like 4 protein (A)	ko04016: MAPK signaling pathway - plant; ko04075: Plant hormone signal transduction
TraesCS6B02G374100	-3.53795	4.54876e-16	1.97494e-14	down	K13993 HSP20 family protein | (RefSeq) 18.6 kDa class III heat shock protein-like (A)	ko04141: Protein processing in endoplasmic reticulum
TraesCS6B02G371800	1.04908	1.04243e-05	8.25092e-05	up	K08678 UDP-glucuronate decarboxylase [EC:4.1.1.35] | (RefSeq) valine--tRNA ligase (A)	ko00520: Amino sugar and nucleotide sugar metabolism; ko01100: Metabolic pathways; ko01250: Biosynthesis of nucleotide sugars
TraesCS6B02G371000	-1.25474	5.67383e-05	0.000367199	down	K10901 bloom syndrome protein [EC:5.6.2.4] | (RefSeq) ATP-dependent DNA helicase Q-like 3 (A)	ko03440: Homologous recombination
TraesCS6B02G365200	1.05287	0.0064924	0.0216832	up	K10525 allene oxide cyclase [EC:5.3.99.6] | (RefSeq) allene oxide cyclase, chloroplastic-like (A)	ko00592: alpha-Linolenic acid metabolism; ko01100: Metabolic pathways; ko01110: Biosynthesis of secondary metabolites
TraesCS6B02G364600	2.10076	9.88901e-06	7.87499e-05	up	K00366 ferredoxin-nitrite reductase [EC:1.7.7.1] | (RefSeq) ferredoxin--nitrite reductase, chloroplastic-like (A)	ko00910: Nitrogen metabolism; ko01100: Metabolic pathways
TraesCS6B02G362100	2.08655	6.29004e-05	0.000402698	up	K05278 flavonol synthase [EC:1.14.20.6] | (RefSeq) flavonol synthase/flavanone 3-hydroxylase-like (A)	ko00941: Flavonoid biosynthesis; ko01100: Metabolic pathways; ko01110: Biosynthesis of secondary metabolites
TraesCS6B02G359400	3.49207	4.00154e-06	3.50028e-05	up	K14488 SAUR family protein | (RefSeq) auxin-responsive protein SAUR32-like (A)	ko04075: Plant hormone signal transduction
TraesCS6B02G358700	1.7085	0.00367892	0.0134932	up	K10683 BRCA1-associated RING domain protein 1 | (RefSeq) hypothetical protein (A)	ko03440: Homologous recombination
TraesCS6B02G355600	-2.00487	0.000524949	0.00258053	down	K19891 glucan endo-1,3-beta-glucosidase 1/2/3 [EC:3.2.1.39] | (RefSeq) hypothetical protein (A)	ko00500: Starch and sucrose metabolism; ko01100: Metabolic pathways
TraesCS6B02G351900	-2.31464	0.0159944	0.0452977	down	K10875 DNA repair and recombination protein RAD54 and RAD54-like protein [EC:5.6.2.-] | (RefSeq) DNA repair and recombination protein RAD54-like (A)	ko03440: Homologous recombination
TraesCS6B02G347700	6.21799	4.65792e-13	1.39036e-11	up	K22706 (R)-mandelonitrile beta-glucosyltransferase [EC:2.4.1.354] | (RefSeq) 7-deoxyloganetin glucosyltransferase-like (A)	ko00460: Cyanoamino acid metabolism; ko01100: Metabolic pathways; ko01110: Biosynthesis of secondary metabolites
TraesCS6B02G347400	-6.74997	5.75 × 10-52	4.27 × 10-49	down	K00020 3-hydroxyisobutyrate dehydrogenase [EC:1.1.1.31] | (GenBank) 6-phosphogluconate dehydrogenase-like protein (A)	ko00280: Valine, leucine and isoleucine degradation; ko01100: Metabolic pathways
TraesCS6B02G347300	-8.79199	4.32779e-26	4.86331e-24	down	K00020 3-hydroxyisobutyrate dehydrogenase [EC:1.1.1.31] | (GenBank) 6-phosphogluconate dehydrogenase-like protein (A)	ko00280: Valine, leucine and isoleucine degradation; ko01100: Metabolic pathways
TraesCS6B02G347200	-7.36331	2.35679e-08	3.29581e-07	down	K00020 3-hydroxyisobutyrate dehydrogenase [EC:1.1.1.31] | (GenBank) 6-phosphogluconate dehydrogenase-like protein (A)	ko00280: Valine, leucine and isoleucine degradation; ko01100: Metabolic pathways
TraesCS6B02G347100	-9.8306	4.67 × 10-63	6.94 × 10-60	down	K00020 3-hydroxyisobutyrate dehydrogenase [EC:1.1.1.31] | (GenBank) 6-phosphogluconate dehydrogenase-like protein (A)	ko00280: Valine, leucine and isoleucine degradation; ko01100: Metabolic pathways
TraesCS6B02G346700	-3.32946	1.70322e-26	1.96347e-24	down	K13993 HSP20 family protein | (RefSeq) 24.1 kDa heat shock protein, mitochondrial isoform X1 (A)	ko04141: Protein processing in endoplasmic reticulum
TraesCS6B02G342800	2.4809	0.000935507	0.00423209	up	K10260 F-box and WD-40 domain protein 7 | (RefSeq) WD40/YVTN repeat-like-containing domain (A)	ko04120: Ubiquitin mediated proteolysis
TraesCS6B02G342600	-1.60731	0.000214747	0.00118221	down	K01179 endoglucanase [EC:3.2.1.4] | (RefSeq) endoglucanase 2-like (A)	ko00500: Starch and sucrose metabolism; ko01100: Metabolic pathways
TraesCS6B02G341600	1.36057	2.88338e-10	5.67655e-09	up	K14012 UBX domain-containing protein 1 | (RefSeq) ATPase family gene 2 protein (A)	ko04141: Protein processing in endoplasmic reticulum
TraesCS6B02G339100	-1.54845	0.00080477	0.0037309	down	K15639 PHYB activation tagged suppressor 1 [EC:1.14.-.-] | (RefSeq) cytochrome P450 734A1-like (A)	ko00905: Brassinosteroid biosynthesis; ko01110: Biosynthesis of secondary metabolites
TraesCS6B02G331500	3.6241	4.88244e-05	0.000322581	up	K24221 type I inositol polyphosphate 5-phosphatase IP5P1/2 [EC:3.1.3.56] | (RefSeq) type I inositol polyphosphate 5-phosphatase 2 isoform X1 (A)	ko00562: Inositol phosphate metabolism; ko01100: Metabolic pathways
TraesCS6B02G331300	-2.85673	3.55255e-19	2.17172e-17	down	K15920 xylan 1,4-beta-xylosidase [EC:3.2.1.37] | (RefSeq) hypothetical protein (A)	ko00520: Amino sugar and nucleotide sugar metabolism; ko01100: Metabolic pathways
TraesCS6B02G327500	1.01786	0.00143973	0.00609536	up	K01915 glutamine synthetase [EC:6.3.1.2] | (RefSeq) glutamine synthetase (A)	ko00220: Arginine biosynthesis; ko00250: Alanine, aspartate and glutamate metabolism; ko00630: Glyoxylate and dicarboxylate metabolism; ko00910: Nitrogen metabolism; ko01100: Metabolic pathways; ko01230: Biosynthesis of amino acids
TraesCS6B02G327100	-1.90634	1.304e-07	1.57772e-06	down	K00799 glutathione S-transferase [EC:2.5.1.18] | (RefSeq) glutathione S-transferase F12-like (A)	ko00480: Glutathione metabolism; ko01100: Metabolic pathways
TraesCS6B02G324000	-2.42513	0.00727468	0.0238301	down	K10260 F-box and WD-40 domain protein 7 | (RefSeq) uncharacterized protein (A)	ko04120: Ubiquitin mediated proteolysis
TraesCS6B02G314600	1.17328	0.00124702	0.00538755	up	K14509 ethylene receptor [EC:2.7.13.-] | (RefSeq) ethylene receptor 4-like (A)	ko04016: MAPK signaling pathway - plant; ko04075: Plant hormone signal transduction
TraesCS6B02G313400	-1.09913	0.000224826	0.00123141	down	K11584 serine/threonine-protein phosphatase 2A regulatory subunit B' | (RefSeq) serine/threonine protein phosphatase 2A 57 kDa regulatory subunit B' beta isoform-like (A)	ko03015: mRNA surveillance pathway
TraesCS6B02G307800	1.53016	0.000870335	0.00398581	up	K14006 protein transport protein SEC23 | (RefSeq) protein transport protein SEC23-like (A)	ko04141: Protein processing in endoplasmic reticulum
TraesCS6B02G306300	1.65998	4.63502e-11	1.04084e-09	up	K00384 thioredoxin reductase (NADPH) [EC:1.8.1.9] | (RefSeq) thioredoxin reductase NTRB (A)	ko00450: Selenocompound metabolism
TraesCS6B02G302400	-1.73533	6.7372e-05	0.000427894	down	K00122 formate dehydrogenase [EC:1.17.1.9] | (RefSeq) formate dehydrogenase 2, mitochondrial-like (A)	ko00630: Glyoxylate and dicarboxylate metabolism; ko01100: Metabolic pathways; ko01200: Carbon metabolism
TraesCS6B02G302100	1.07894	0.000333624	0.00174103	up	K11420 [histone H3]-lysine9 N-trimethyltransferase EHMT [EC:2.1.1.355] | (RefSeq) histone-lysine N-methyltransferase, H3 lysine-9 specific SUVH6-like (A)	ko00310: Lysine degradation; ko01100: Metabolic pathways
TraesCS6B02G302000	-1.28226	0.00309444	0.0116491	down	K01087 trehalose 6-phosphate phosphatase [EC:3.1.3.12] | (RefSeq) trehalose-phosphate phosphatase A (A)	ko00500: Starch and sucrose metabolism; ko01100: Metabolic pathways; ko01110: Biosynthesis of secondary metabolites
TraesCS6B02G300400	4.31989	9.68559e-09	1.4598e-07	up	K18878 BHLH transcription factor Upa20 | (RefSeq) Upa20; transcription factor bHLH137-like (A)	ko04626: Plant-pathogen interaction
TraesCS6B02G298500	2.71003	8.59708e-11	1.83356e-09	up	K09843 (+)-abscisic acid 8'-hydroxylase [EC:1.14.14.137] | (RefSeq) abscisic acid 8'-hydroxylase 1 (A)	ko00906: Carotenoid biosynthesis; ko01110: Biosynthesis of secondary metabolites
TraesCS6B02G295300	1.33253	0.000693399	0.0032765	up	K00951 GTP pyrophosphokinase [EC:2.7.6.5] | (RefSeq) Guanosine-3',5'-bis(diphosphate) 3'-pyrophosphohydrolase (A)	ko00230: Purine metabolism; ko01100: Metabolic pathways
TraesCS6B02G295200	-1.57801	0.00541562	0.0186063	down	K07937 ADP-ribosylation factor 1/2 | (RefSeq) ADP-ribosylation factor-like (A)	ko04144: Endocytosis
TraesCS6B02G294100	-1.73316	0.00997021	0.0307842	down	K01904 4-coumarate--CoA ligase [EC:6.2.1.12] | (RefSeq) probable 4-coumarate--CoA ligase 2 (A)	ko00130: Ubiquinone and other terpenoid-quinone biosynthesis; ko00940: Phenylpropanoid biosynthesis; ko01100: Metabolic pathways; ko01110: Biosynthesis of secondary metabolites
TraesCS6B02G292300	1.41024	9.50933e-05	0.000579201	up	K12486 stromal membrane-associated protein | (RefSeq) hypothetical protein (A)	ko04144: Endocytosis
TraesCS6B02G291900	-3.28842	1.39313e-09	2.42917e-08	down	K05658 ATP-binding cassette, subfamily B (MDR/TAP), member 1 [EC:7.6.2.2] | (RefSeq) ABC transporter B family member 2-like (A)	ko02010: ABC transporters
TraesCS6B02G285600	1.46649	8.42756e-07	8.61766e-06	up	K08331 autophagy-related protein 13 | (RefSeq) autophagy-related protein 13a-like (A)	ko04136: Autophagy - other
TraesCS6B02G281600	1.12896	6.58124e-07	6.89445e-06	up	K05607 methylglutaconyl-CoA hydratase [EC:4.2.1.18] | (RefSeq) probable enoyl-CoA hydratase 2, mitochondrial (A)	ko00280: Valine, leucine and isoleucine degradation; ko01100: Metabolic pathways
TraesCS6B02G280300	1.01037	0.0171827	0.0480049	up	K04715 ceramide kinase [EC:2.7.1.138] | (RefSeq) ceramide kinase-like isoform X1 (A)	ko00600: Sphingolipid metabolism; ko01100: Metabolic pathways
TraesCS6B02G279400	-7.105	1.04054e-07	1.28394e-06	down	K15398 fatty acid omega-hydroxylase [EC:1.14.-.-] | (RefSeq) cytochrome P450 86A2-like (A)	ko00073: Cutin, suberine and wax biosynthesis; ko01100: Metabolic pathways
TraesCS6B02G278100	-1.49203	4.10593e-09	6.64636e-08	down	K00432 glutathione peroxidase [EC:1.11.1.9] | (RefSeq) probable phospholipid hydroperoxide glutathione peroxidase (A)	ko00480: Glutathione metabolism; ko00590: Arachidonic acid metabolism; ko01100: Metabolic pathways
TraesCS6B02G276800	-1.64535	2.98128e-08	4.11093e-07	down	K00789 S-adenosylmethionine synthetase [EC:2.5.1.6] | (RefSeq) S-adenosylmethionine synthase 2-like (A)	ko00270: Cysteine and methionine metabolism; ko00999: Biosynthesis of various plant secondary metabolites; ko01100: Metabolic pathways; ko01110: Biosynthesis of secondary metabolites; ko01230: Biosynthesis of amino acids; ko01240: Biosynthesis of cofactors
TraesCS6B02G276700	-1.65567	2.62407e-08	3.65145e-07	down	K00789 S-adenosylmethionine synthetase [EC:2.5.1.6] | (RefSeq) S-adenosylmethionine synthase 3 (A)	ko00270: Cysteine and methionine metabolism; ko00999: Biosynthesis of various plant secondary metabolites; ko01100: Metabolic pathways; ko01110: Biosynthesis of secondary metabolites; ko01230: Biosynthesis of amino acids; ko01240: Biosynthesis of cofactors
TraesCS6B02G276300	-5.00707	6.77547e-06	5.63552e-05	down	K01087 trehalose 6-phosphate phosphatase [EC:3.1.3.12] | (RefSeq) probable trehalose-phosphate phosphatase 1 (A)	ko00500: Starch and sucrose metabolism; ko01100: Metabolic pathways; ko01110: Biosynthesis of secondary metabolites
TraesCS6B02G266500	1.84503	2.43328e-06	2.23674e-05	up	K13429 chitin elicitor receptor kinase 1 | (RefSeq) lysM domain receptor-like kinase 3 (A)	ko04626: Plant-pathogen interaction
TraesCS6B02G265600	1.72021	5.35686e-07	5.71705e-06	up	K12502 MPBQ/MSBQ methyltransferase [EC:2.1.1.295] | (RefSeq) 2-methyl-6-phytyl-1,4-hydroquinone methyltransferase 1, chloroplastic (A)	ko00130: Ubiquinone and other terpenoid-quinone biosynthesis; ko01100: Metabolic pathways; ko01110: Biosynthesis of secondary metabolites; ko01240: Biosynthesis of cofactors
TraesCS6B02G263700	1.85559	3.63865e-06	3.21439e-05	up	K12200 programmed cell death 6-interacting protein | (RefSeq) vacuolar-sorting protein BRO1-like (A)	ko03250: Viral life cycle - HIV-1; ko04144: Endocytosis
TraesCS6B02G262800	-1.38528	0.000578635	0.00280736	down	K12623 U6 snRNA-associated Sm-like protein LSm4 | (RefSeq) putative U6 snRNA-associated Sm-like protein LSm4 (A)	ko03018: RNA degradation; ko03040: Spliceosome
TraesCS6B02G255400	-1.7033	0.000289362	0.00153506	down	K14488 SAUR family protein | (RefSeq) auxin-responsive protein SAUR32 (A)	ko04075: Plant hormone signal transduction
TraesCS6B02G255100	1.38796	5.0765e-06	4.34885e-05	up	K15404 aldehyde decarbonylase [EC:4.1.99.5] | (RefSeq) very-long-chain aldehyde decarbonylase GL1-4 (A)	ko00073: Cutin, suberine and wax biosynthesis; ko01110: Biosynthesis of secondary metabolites
TraesCS6B02G249100	-1.25953	0.00368136	0.0134985	down	K23700 [histone H3]-lysine36 N-trimethyltransferase [EC:2.1.1.359] | (RefSeq) histone-lysine N-methyltransferase, H3 lysine-36 specific-like (A)	ko00310: Lysine degradation; ko01100: Metabolic pathways
TraesCS6B02G247300	-3.33236	2.53991e-05	0.000180953	down	K12501 homogentisate solanesyltransferase [EC:2.5.1.117] | (RefSeq) TNF receptor-associated factor family protein DDB_G0290931-like (A)	ko00130: Ubiquinone and other terpenoid-quinone biosynthesis; ko01100: Metabolic pathways; ko01110: Biosynthesis of secondary metabolites; ko01240: Biosynthesis of cofactors
TraesCS6B02G247200	-1.12249	0.00314355	0.0118074	down	K05681 ATP-binding cassette, subfamily G (WHITE), member 2 | (RefSeq) hypothetical protein (A)	ko02010: ABC transporters
TraesCS6B02G247000	-1.35339	0.0100591	0.0309998	down	K07407 alpha-galactosidase [EC:3.2.1.22] | (RefSeq) alpha-galactosidase-like isoform X1 (A)	ko00052: Galactose metabolism; ko00561: Glycerolipid metabolism; ko00600: Sphingolipid metabolism; ko00603: Glycosphingolipid biosynthesis - globo and isoglobo series; ko01100: Metabolic pathways
TraesCS6B02G240500	-1.44033	8.47292e-06	6.85408e-05	down	K18584 actin-related protein 3 | (RefSeq) actin-related protein 3-like (A)	ko04144: Endocytosis
TraesCS6B02G240200	-1.26706	2.25785e-06	2.09166e-05	down	K10875 DNA repair and recombination protein RAD54 and RAD54-like protein [EC:5.6.2.-] | (RefSeq) uncharacterized protein LOC123104662 (A)	ko03440: Homologous recombination
TraesCS6B02G239400	-2.51331	1.57738e-05	0.000118951	down	K15402 fatty acid omega-hydroxylase [EC:1.14.-.-] | (RefSeq) cytochrome P450 86B1 (A)	ko00073: Cutin, suberine and wax biosynthesis
TraesCS6B02G238600	-1.37608	0.000866149	0.00397037	down	K02358 elongation factor Tu | (RefSeq) elongation factor Tu, chloroplastic-like (A)	ko04626: Plant-pathogen interaction
TraesCS6B02G229200	1.2311	2.64408e-05	0.000187476	up	K00411 ubiquinol-cytochrome c reductase iron-sulfur subunit [EC:7.1.1.8] | (RefSeq) cytochrome b-c1 complex subunit Rieske, mitochondrial-like (A)	ko00190: Oxidative phosphorylation; ko01100: Metabolic pathways
TraesCS6B02G226700	-2.04624	4.70382e-10	8.93492e-09	down	K01126 glycerophosphoryl diester phosphodiesterase [EC:3.1.4.46] | (RefSeq) glycerophosphodiester phosphodiesterase GDPD6 (A)	ko00564: Glycerophospholipid metabolism
TraesCS6B02G224100	1.16744	7.29263e-05	0.000458705	up	K12118 cryptochrome 1 | (RefSeq) cryptochrome-1 isoform X1 (A)	ko04712: Circadian rhythm - plant
TraesCS6B02G221100	-1.50773	0.000671279	0.00318802	down	K13347 peroxisomal membrane protein 2 | (RefSeq) peroxisomal membrane protein PMP22-like isoform X1 (A)	ko04146: Peroxisome
TraesCS6B02G216900	1.8016	1.75046e-11	4.21007e-10	up	K14497 protein phosphatase 2C [EC:3.1.3.16] | (RefSeq) protein phosphatase 2C 53-like (A)	ko04016: MAPK signaling pathway - plant; ko04075: Plant hormone signal transduction
TraesCS6B02G215300	1.34992	1.08557e-08	1.61612e-07	up	K06689 ubiquitin-conjugating enzyme E2 D [EC:2.3.2.23] | (RefSeq) ubiquitin-conjugating enzyme E2 E2-like (A)	ko04120: Ubiquitin mediated proteolysis; ko04141: Protein processing in endoplasmic reticulum
TraesCS6B02G210600	-7.834	4.54 × 10-45	2.06 × 10-42	down	K13993 HSP20 family protein | (RefSeq) 23.6 kDa heat shock protein, mitochondrial-like (A)	ko04141: Protein processing in endoplasmic reticulum
TraesCS6B02G209600	-1.6456	0.00216489	0.00860837	down	K16241 transcription factor HY5 | (RefSeq) transcription factor HY5-like (A)	ko04712: Circadian rhythm - plant
TraesCS6B02G207000	-1.17505	0.00583671	0.0198075	down	K15397 3-ketoacyl-CoA synthase [EC:2.3.1.199] | (RefSeq) 3-ketoacyl-CoA synthase 11-like (A)	ko00062: Fatty acid elongation; ko01100: Metabolic pathways; ko01110: Biosynthesis of secondary metabolites; ko04626: Plant-pathogen interaction
TraesCS6B02G205900	1.97963	4.30095e-08	5.71714e-07	up	K08711 ATP-binding cassette, subfamily G (WHITE), member 2, PDR | (RefSeq) LOW QUALITY PROTEIN: ZEB2-regulated ABC transporter 1-like (A)	ko02010: ABC transporters
TraesCS6B02G201600	-1.69564	7.17821e-07	7.44835e-06	down	K00083 cinnamyl-alcohol dehydrogenase [EC:1.1.1.195] | (RefSeq) probable cinnamyl alcohol dehydrogenase (A)	ko00940: Phenylpropanoid biosynthesis; ko01100: Metabolic pathways; ko01110: Biosynthesis of secondary metabolites
TraesCS6B02G199500	-2.79815	2.10433e-07	2.45123e-06	down	K06443 lycopene beta-cyclase [EC:5.5.1.19] | (RefSeq) lycopene beta cyclase, chloroplastic-like (A)	ko00906: Carotenoid biosynthesis; ko01100: Metabolic pathways; ko01110: Biosynthesis of secondary metabolites
TraesCS6B02G198600	1.07188	0.00357999	0.0131919	up	K11583 serine/threonine-protein phosphatase 2A regulatory subunit B'' | (RefSeq) probable serine/threonine protein phosphatase 2A regulatory subunit B''delta (A)	ko03015: mRNA surveillance pathway
TraesCS6B02G197000	-1.96128	0.000649923	0.00310258	down	K13429 chitin elicitor receptor kinase 1 | (RefSeq) lysM domain receptor-like kinase 3 (A)	ko04626: Plant-pathogen interaction
TraesCS6B02G192100	-1.21505	2.42383e-06	2.22959e-05	down	K09458 3-oxoacyl-[acyl-carrier-protein] synthase II [EC:2.3.1.179] | (RefSeq) 3-oxoacyl-[acyl-carrier-protein] synthase, mitochondrial-like isoform X1 (A)	ko00061: Fatty acid biosynthesis; ko00780: Biotin metabolism; ko01100: Metabolic pathways; ko01212: Fatty acid metabolism; ko01240: Biosynthesis of cofactors
TraesCS6B02G190700	-2.81482	0.0144634	0.0417285	down	K13448 calcium-binding protein CML | (RefSeq) probable calcium-binding protein CML21 (A)	ko04626: Plant-pathogen interaction
TraesCS6B02G190600	-1.05781	0.000651834	0.00311059	down	K12486 stromal membrane-associated protein | (RefSeq) ADP-ribosylation factor GTPase-activating protein AGD12-like isoform X1 (A)	ko04144: Endocytosis
TraesCS6B02G189800	-3.68965	4.73228e-06	4.07879e-05	down	K10875 DNA repair and recombination protein RAD54 and RAD54-like protein [EC:5.6.2.-] | (RefSeq) uncharacterized protein LOC123104662 (A)	ko03440: Homologous recombination
TraesCS6B02G185400	1.22871	1.59958e-05	0.000120442	up	K00134 glyceraldehyde 3-phosphate dehydrogenase (phosphorylating) [EC:1.2.1.12] | (RefSeq) glyceraldehyde-3-phosphate dehydrogenase GAPCP1, chloroplastic-like (A)	ko00010: Glycolysis / Gluconeogenesis; ko00710: Carbon fixation in photosynthetic organisms; ko01100: Metabolic pathways; ko01110: Biosynthesis of secondary metabolites; ko01200: Carbon metabolism; ko01230: Biosynthesis of amino acids
TraesCS6B02G181200	-2.66334	1.11361e-08	1.65436e-07	down	K10583 ubiquitin-conjugating enzyme E2 S [EC:2.3.2.23] | (RefSeq) ubiquitin-conjugating enzyme E2 22-like isoform X1 (A)	ko04120: Ubiquitin mediated proteolysis
TraesCS6B02G181100	1.31731	7.20276e-06	5.94653e-05	up	K01489 cytidine deaminase [EC:3.5.4.5] | (RefSeq) cytidine deaminase 1-like (A)	ko00240: Pyrimidine metabolism; ko01100: Metabolic pathways; ko01232: Nucleotide metabolism
TraesCS6B02G179900	-3.64196	4.16987e-21	3.11083e-19	down	K01904 4-coumarate--CoA ligase [EC:6.2.1.12] | (RefSeq) probable 4-coumarate--CoA ligase 3 (A)	ko00130: Ubiquinone and other terpenoid-quinone biosynthesis; ko00940: Phenylpropanoid biosynthesis; ko01100: Metabolic pathways; ko01110: Biosynthesis of secondary metabolites
TraesCS6B02G179000	-1.17699	0.000390488	0.00199782	down	K12135 zinc finger protein CONSTANS | (RefSeq) zinc finger protein CONSTANS-like (A)	ko04712: Circadian rhythm - plant
TraesCS6B02G178000	1.85792	3.58843e-05	0.000245737	up	K15404 aldehyde decarbonylase [EC:4.1.99.5] | (RefSeq) protein ECERIFERUM 3-like (A)	ko00073: Cutin, suberine and wax biosynthesis; ko01110: Biosynthesis of secondary metabolites
TraesCS6B02G170700	1.38365	0.00618306	0.0208191	up	K05658 ATP-binding cassette, subfamily B (MDR/TAP), member 1 [EC:7.6.2.2] | (RefSeq) ABC transporter B family member 19-like isoform X1 (A)	ko02010: ABC transporters
TraesCS6B02G169700	1.2754	3.50014e-08	4.74942e-07	up	K00457 4-hydroxyphenylpyruvate dioxygenase [EC:1.13.11.27] | (RefSeq) 4-hydroxyphenylpyruvate dioxygenase-like (A)	ko00130: Ubiquinone and other terpenoid-quinone biosynthesis; ko00350: Tyrosine metabolism; ko00360: Phenylalanine metabolism; ko01100: Metabolic pathways; ko01240: Biosynthesis of cofactors
TraesCS6B02G169500	-2.74997	0.0069328	0.0228897	down	K14488 SAUR family protein | (RefSeq) auxin-responsive protein SAUR71-like (A)	ko04075: Plant hormone signal transduction
TraesCS6B02G168700	-1.55046	0.0028861	0.0109869	down	K01011 thiosulfate/3-mercaptopyruvate sulfurtransferase [EC:2.8.1.1 2.8.1.2] | (RefSeq) thiosulfate/3-mercaptopyruvate sulfurtransferase 2-like isoform X1 (A)	ko00270: Cysteine and methionine metabolism; ko00920: Sulfur metabolism; ko01100: Metabolic pathways; ko04122: Sulfur relay system
TraesCS6B02G168500	1.45835	8.91296e-08	1.11495e-06	up	K01942 biotin---protein ligase [EC:6.3.4.9 6.3.4.10 6.3.4.11 6.3.4.15] | (RefSeq) biotin--protein ligase 2-like (A)	ko00780: Biotin metabolism; ko01100: Metabolic pathways
TraesCS6B02G168300	1.12415	0.00125599	0.00541974	up	K13413 mitogen-activated protein kinase kinase 4/5 [EC:2.7.12.2] | (RefSeq) mitogen-activated protein kinase kinase 5-like (A)	ko04016: MAPK signaling pathway - plant; ko04075: Plant hormone signal transduction; ko04626: Plant-pathogen interaction
TraesCS6B02G166600	-1.95385	3.09891e-05	0.000215863	down	K12850 pre-mRNA-splicing factor 38B | (RefSeq) pre-mRNA splicing factor SR-like 1 isoform X1 (A)	ko03040: Spliceosome
TraesCS6B02G160100	-1.09851	0.0062894	0.0211067	down	K14573 nucleolar protein 4 | (RefSeq) hypothetical protein (A)	ko03008: Ribosome biogenesis in eukaryotes
TraesCS6B02G158300	1.92767	6.32272e-11	1.38211e-09	up	K13224 indolin-2-one monooxygenase [EC:1.14.14.157] | (RefSeq) indolin-2-one monooxygenase-like (A)	ko00402: Benzoxazinoid biosynthesis; ko01110: Biosynthesis of secondary metabolites
TraesCS6B02G148400	1.6676	0.0135373	0.0395085	up	K13457 disease resistance protein RPM1 | (RefSeq) disease resistance protein RPM1-like (A)	ko04626: Plant-pathogen interaction
TraesCS6B02G146500	-1.96129	2.35779e-16	1.0616e-14	down	K00430 peroxidase [EC:1.11.1.7] | (RefSeq) peroxidase P7-like isoform X1 (A)	ko00940: Phenylpropanoid biosynthesis; ko01100: Metabolic pathways; ko01110: Biosynthesis of secondary metabolites
TraesCS6B02G143500	3.5797	8.32694e-05	0.000515997	up	K14488 SAUR family protein | (RefSeq) auxin-responsive protein SAUR50-like (A)	ko04075: Plant hormone signal transduction
TraesCS6B02G141400	1.21548	0.00426208	0.0152443	up	K12446 L-arabinokinase [EC:2.7.1.46] | (RefSeq) L-arabinokinase-like (A)	ko00520: Amino sugar and nucleotide sugar metabolism; ko01100: Metabolic pathways; ko01250: Biosynthesis of nucleotide sugars
TraesCS6B02G138300	-1.03835	0.00017539	0.000990913	down	K19893 glucan endo-1,3-beta-glucosidase 5/6 [EC:3.2.1.39] | (RefSeq) glucan endo-1,3-beta-glucosidase 6-like (A)	ko00500: Starch and sucrose metabolism; ko01100: Metabolic pathways
TraesCS6B02G135800	1.06059	0.00109329	0.00482587	up	K04498 E1A/CREB-binding protein [EC:2.3.1.48] | (RefSeq) probable histone acetyltransferase HAC-like 1 isoform X1 (A)	ko03250: Viral life cycle - HIV-1
TraesCS6B02G135200	1.43325	6.27715e-09	9.86093e-08	up	K01510 apyrase [EC:3.6.1.5] | (RefSeq) probable apyrase 6 isoform X1 (A)	ko00230: Purine metabolism; ko00240: Pyrimidine metabolism; ko01100: Metabolic pathways; ko01110: Biosynthesis of secondary metabolites; ko01232: Nucleotide metabolism
TraesCS6B02G134100	1.30962	1.28153e-07	1.55264e-06	up	K07466 replication factor A1 | (RefSeq) uncharacterized protein LOC119288473 (A)	ko03030: DNA replication; ko03420: Nucleotide excision repair; ko03430: Mismatch repair; ko03440: Homologous recombination
TraesCS6B02G130100	-2.20153	3.37557e-15	1.32667e-13	down	K08054 calnexin | (RefSeq) calnexin homolog (A)	ko04141: Protein processing in endoplasmic reticulum; ko04145: Phagosome
TraesCS6B02G129800	-2.02217	8.36e-09	1.27546e-07	down	K08054 calnexin | (RefSeq) calnexin homolog (A)	ko04141: Protein processing in endoplasmic reticulum; ko04145: Phagosome
TraesCS6B02G125500	2.54513	1.27721e-06	1.25677e-05	up	K02257 heme o synthase [EC:2.5.1.141] | (RefSeq) protoheme IX farnesyltransferase, mitochondrial-like (A)	ko00190: Oxidative phosphorylation; ko00860: Porphyrin metabolism; ko01100: Metabolic pathways; ko01110: Biosynthesis of secondary metabolites; ko01240: Biosynthesis of cofactors
TraesCS6B02G117900	2.14857	0.0015117	0.00635249	up	K13457 disease resistance protein RPM1 | (RefSeq) putative disease resistance RPP13-like protein 3 (A)	ko04626: Plant-pathogen interaction
TraesCS6B02G117600	1.1609	0.00170227	0.0070194	up	K08681 pyridoxal 5'-phosphate synthase pdxT subunit [EC:4.3.3.6] | (RefSeq) probable pyridoxal 5'-phosphate synthase subunit PDX2 (A)	ko00750: Vitamin B6 metabolism; ko01100: Metabolic pathways; ko01240: Biosynthesis of cofactors
TraesCS6B02G116400	1.21772	0.010356	0.0317487	up	K01177 beta-amylase [EC:3.2.1.2] | (RefSeq) beta-amylase 8-like isoform X1 (A)	ko00500: Starch and sucrose metabolism; ko01100: Metabolic pathways; ko01110: Biosynthesis of secondary metabolites
TraesCS6B02G114900	-1.06532	0.000684184	0.00324011	down	K07937 ADP-ribosylation factor 1/2 | (RefSeq) ADP-ribosylation factor-like (A)	ko04144: Endocytosis
TraesCS6B02G113700	1.07018	5.7291e-06	4.85131e-05	up	K13176 THO complex subunit 7 | (RefSeq) THO complex subunit 7B-like (A)	ko03013: Nucleocytoplasmic transport
TraesCS6B02G111300	1.03124	3.11527e-06	2.79215e-05	up	K08495 golgi SNAP receptor complex member 1 | (RefSeq) Golgi SNAP receptor complex member 1-2 (A)	ko04130: SNARE interactions in vesicular transport
TraesCS6B02G108100	1.70747	7.83259e-11	1.68371e-09	up	K01703 3-isopropylmalate/(R)-2-methylmalate dehydratase large subunit [EC:4.2.1.33 4.2.1.35] | (RefSeq) 3-isopropylmalate dehydratase large subunit, chloroplastic-like (A)	ko00290: Valine, leucine and isoleucine biosynthesis; ko00660: C5-Branched dibasic acid metabolism; ko00966: Glucosinolate biosynthesis; ko01100: Metabolic pathways; ko01110: Biosynthesis of secondary metabolites; ko01210: 2-Oxocarboxylic acid metabolism; ko01230: Biosynthesis of amino acids
TraesCS6B02G103100	1.88721	4.26771e-10	8.16452e-09	up	K01681 aconitate hydratase [EC:4.2.1.3] | (RefSeq) putative aconitate hydratase, cytoplasmic (A)	ko00020: Citrate cycle (TCA cycle); ko00630: Glyoxylate and dicarboxylate metabolism; ko01100: Metabolic pathways; ko01110: Biosynthesis of secondary metabolites; ko01200: Carbon metabolism; ko01210: 2-Oxocarboxylic acid metabolism; ko01230: Biosynthesis of amino acids
TraesCS6B02G088500	-1.07619	3.81625e-06	3.35136e-05	down	K12893 serine/arginine-rich splicing factor 4/5/6 | (RefSeq) serine/arginine-rich splicing factor RS41-like isoform X1 (A)	ko03040: Spliceosome
TraesCS6B02G084400	-1.46608	0.000251549	0.0013605	down	K01807 ribose 5-phosphate isomerase A [EC:5.3.1.6] | (RefSeq) probable ribose-5-phosphate isomerase 3, chloroplastic (A)	ko00030: Pentose phosphate pathway; ko00710: Carbon fixation in photosynthetic organisms; ko01100: Metabolic pathways; ko01110: Biosynthesis of secondary metabolites; ko01200: Carbon metabolism; ko01230: Biosynthesis of amino acids
TraesCS6B02G080100	2.47108	3.23084e-19	1.98413e-17	up	K13227 UDP-glucosyltransferase BX8/BX9 [EC:2.4.1.202] | (RefSeq) DIMBOA UDP-glucosyltransferase BX8-like (A)	ko00402: Benzoxazinoid biosynthesis; ko01110: Biosynthesis of secondary metabolites
TraesCS6B02G074900	2.05364	0.00154285	0.00646002	up	K01681 aconitate hydratase [EC:4.2.1.3] | (RefSeq) putative aconitate hydratase, cytoplasmic (A)	ko00020: Citrate cycle (TCA cycle); ko00630: Glyoxylate and dicarboxylate metabolism; ko01100: Metabolic pathways; ko01110: Biosynthesis of secondary metabolites; ko01200: Carbon metabolism; ko01210: 2-Oxocarboxylic acid metabolism; ko01230: Biosynthesis of amino acids
TraesCS6B02G066500	1.04033	0.0148998	0.0427684	up	K08339 autophagy-related protein 5 | (RefSeq) autophagy protein 5-like (A)	ko04136: Autophagy - other
TraesCS6B02G060800	-1.78914	2.44396e-05	0.000174956	down	K01087 trehalose 6-phosphate phosphatase [EC:3.1.3.12] | (RefSeq) uncharacterized protein LOC119360763 (A)	ko00500: Starch and sucrose metabolism; ko01100: Metabolic pathways; ko01110: Biosynthesis of secondary metabolites
TraesCS6B02G046800	1.85261	0.000542997	0.00265784	up	K18054 2'-deoxymugineic-acid 2'-dioxygenase / mugineic-acid 3-dioxygenase [EC:1.14.11.24 1.14.11.25] | (RefSeq) 2'-deoxymugineic-acid 2'-dioxygenase-like (A)	ko00999: Biosynthesis of various plant secondary metabolites; ko01100: Metabolic pathways; ko01110: Biosynthesis of secondary metabolites
TraesCS6B02G042100	-1.12306	0.000986453	0.00442365	down	K07178 RIO kinase 1 [EC:2.7.11.1] | (RefSeq) serine/threonine-protein kinase RIO1-like (A)	ko03008: Ribosome biogenesis in eukaryotes
TraesCS6B02G041900	1.37101	0.00168425	0.00695437	up	K13457 disease resistance protein RPM1 | (RefSeq) disease resistance protein RPM1 (A)	ko04626: Plant-pathogen interaction
TraesCS6B02G027800	1.67784	0.0023749	0.00932288	up	K14490 histidine-containing phosphotransfer peotein | (RefSeq) histidine-containing phosphotransfer protein 1-like (A)	ko04075: Plant hormone signal transduction
TraesCS6B02G023900	1.01023	1.38539e-06	1.35276e-05	up	K10579 ubiquitin-conjugating enzyme E2 M [EC:2.3.2.34] | (RefSeq) NEDD8-conjugating enzyme Ubc12-like isoform X1 (A)	ko04120: Ubiquitin mediated proteolysis
TraesCS6B02G004400	2.84137	0.000219893	0.00120698	up	K15893 glycerate dehydrogenase [EC:1.1.1.29] | (RefSeq) glycerate dehydrogenase (A)	ko00260: Glycine, serine and threonine metabolism; ko00630: Glyoxylate and dicarboxylate metabolism; ko01100: Metabolic pathways; ko01110: Biosynthesis of secondary metabolites; ko01200: Carbon metabolism
TraesCS6B02G000300	1.44989	0.0050829	0.0176686	up	K10590 E3 ubiquitin-protein ligase TRIP12 [EC:2.3.2.26] | (RefSeq) E3 ubiquitin-protein ligase UPL3-like (A)	ko04120: Ubiquitin mediated proteolysis
TraesCS6A02G416400	2.10022	0.0114115	0.0344036	up	K14492 two-component response regulator ARR-A family | (RefSeq) two-component response regulator ORR3-like isoform X1 (A)	ko04075: Plant hormone signal transduction
TraesCS6A02G408200	-2.71189	1.89069e-07	2.22564e-06	down	K08744 cardiolipin synthase (CMP-forming) [EC:2.7.8.41] | (RefSeq) uncharacterized protein LOC123129116 isoform X1 (A)	ko00564: Glycerophospholipid metabolism; ko01100: Metabolic pathways
TraesCS6A02G392700	1.26928	3.71642e-08	5.01239e-07	up	K01456 peptide-N4-(N-acetyl-beta-glucosaminyl)asparagine amidase [EC:3.5.1.52] | (RefSeq) peptide-N(4)-(N-acetyl-beta- glucosaminyl)asparagine amidase isoform X1 (A)	ko04141: Protein processing in endoplasmic reticulum
TraesCS6A02G392600	1.09923	0.00163549	0.00678525	up	K14484 auxin-responsive protein IAA | (RefSeq) auxin-responsive protein IAA10-like isoform X1 (A)	ko04075: Plant hormone signal transduction
TraesCS6A02G391200	-1.85139	0.00251008	0.00976682	down	K22588 acetylserotonin O-methyltransferase, plant [EC:2.1.1.4] | (RefSeq) acetylserotonin O-methyltransferase 1-like (A)	ko00380: Tryptophan metabolism; ko01100: Metabolic pathways; ko01110: Biosynthesis of secondary metabolites
TraesCS6A02G386800	1.271	0.000440942	0.00221652	up	K13430 serine/threonine-protein kinase PBS1 [EC:2.7.11.1] | (RefSeq) serine/threonine-protein kinase PBS1 (A)	ko04626: Plant-pathogen interaction
TraesCS6A02G385500	-2.38861	0.000661948	0.00315122	down	K00975 glucose-1-phosphate adenylyltransferase [EC:2.7.7.27] | (RefSeq) putative two-component response regulator ARR21 (A)	ko00500: Starch and sucrose metabolism; ko00520: Amino sugar and nucleotide sugar metabolism; ko01100: Metabolic pathways; ko01110: Biosynthesis of secondary metabolites; ko01250: Biosynthesis of nucleotide sugars
TraesCS6A02G383700	-7.75681	2.55421e-08	3.55979e-07	down	K15397 3-ketoacyl-CoA synthase [EC:2.3.1.199] | (RefSeq) 3-ketoacyl-CoA synthase 12-like (A)	ko00062: Fatty acid elongation; ko01100: Metabolic pathways; ko01110: Biosynthesis of secondary metabolites; ko04626: Plant-pathogen interaction
TraesCS6A02G381300	-4.63486	8.90615e-13	2.55574e-11	down	K09753 cinnamoyl-CoA reductase [EC:1.2.1.44] | (RefSeq) cinnamoyl-CoA reductase 1-like (A)	ko00940: Phenylpropanoid biosynthesis; ko01100: Metabolic pathways; ko01110: Biosynthesis of secondary metabolites
TraesCS6A02G375300	-1.27675	0.000517554	0.00255081	down	K13065 shikimate O-hydroxycinnamoyltransferase [EC:2.3.1.133] | (RefSeq) agmatine coumaroyltransferase-2-like (A)	ko00940: Phenylpropanoid biosynthesis; ko00941: Flavonoid biosynthesis; ko00945: Stilbenoid, diarylheptanoid and gingerol biosynthesis; ko01100: Metabolic pathways; ko01110: Biosynthesis of secondary metabolites
TraesCS6A02G374600	-2.9194	3.94217e-22	3.2292e-20	down	K00020 3-hydroxyisobutyrate dehydrogenase [EC:1.1.1.31] | (RefSeq) probable 3-hydroxyisobutyrate dehydrogenase-like 2, mitochondrial (A)	ko00280: Valine, leucine and isoleucine degradation; ko01100: Metabolic pathways
TraesCS6A02G370300	-2.7859	3.25629e-16	1.43831e-14	down	K01455 formamidase [EC:3.5.1.49] | (RefSeq) formamidase-like (A)	ko00460: Cyanoamino acid metabolism; ko00630: Glyoxylate and dicarboxylate metabolism; ko00910: Nitrogen metabolism; ko01100: Metabolic pathways; ko01200: Carbon metabolism
TraesCS6A02G368600	1.47059	0.00358234	0.0131963	up	K09564 peptidyl-prolyl isomerase E (cyclophilin E) [EC:5.2.1.8] | (RefSeq) peptidyl-prolyl cis-trans isomerase E (A)	ko03040: Spliceosome
TraesCS6A02G367200	-1.51818	1.10426e-05	8.68118e-05	down	K11599 proteasome maturation protein | (RefSeq) cyclin-B1-2-like (A)	ko03050: Proteasome
TraesCS6A02G359200	1.03238	0.0160512	0.0454347	up	K14491 two-component response regulator ARR-B family | (RefSeq) two-component response regulator ORR23-like (A)	ko04075: Plant hormone signal transduction
TraesCS6A02G353700	2.77912	4.77757e-07	5.1533e-06	up	K13071 pheophorbide a oxygenase [EC:1.14.15.17] | (RefSeq) pheophorbide a oxygenase, chloroplastic (A)	ko00860: Porphyrin metabolism; ko01110: Biosynthesis of secondary metabolites
TraesCS6A02G343600	-1.28253	0.00258983	0.0100246	down	K04506 E3 ubiquitin-protein ligase SIAH1 [EC:2.3.2.27] | (RefSeq) uncharacterized protein LOC123128665 (A)	ko04120: Ubiquitin mediated proteolysis
TraesCS6A02G339900	-1.34856	0.00426749	0.0152596	down	K10901 bloom syndrome protein [EC:5.6.2.4] | (RefSeq) ATP-dependent DNA helicase Q-like 3 (A)	ko03440: Homologous recombination
TraesCS6A02G331300	8.22783	3.78249e-09	6.16282e-08	up	K22706 (R)-mandelonitrile beta-glucosyltransferase [EC:2.4.1.354] | (RefSeq) 7-deoxyloganetin glucosyltransferase-like (A)	ko00460: Cyanoamino acid metabolism; ko01100: Metabolic pathways; ko01110: Biosynthesis of secondary metabolites
TraesCS6A02G329400	1.5958	1.22558e-08	1.80696e-07	up	K14509 ethylene receptor [EC:2.7.13.-] | (RefSeq) ethylene receptor 4-like (A)	ko04016: MAPK signaling pathway - plant; ko04075: Plant hormone signal transduction
TraesCS6A02G327400	1.58092	0.000672487	0.00319291	up	K10683 BRCA1-associated RING domain protein 1 | (RefSeq) hypothetical protein (A)	ko03440: Homologous recombination
TraesCS6A02G326400	1.43214	5.64655e-05	0.000365658	up	K01191 alpha-mannosidase [EC:3.2.1.24] | (RefSeq) alpha-mannosidase At3g26720-like (A)	ko00511: Other glycan degradation
TraesCS6A02G326200	1.34013	0.00103842	0.00462068	up	K10534 nitrate reductase (NAD(P)H) [EC:1.7.1.1 1.7.1.2 1.7.1.3] | (RefSeq) nitrate reductase [NAD(P)H]-like (A)	ko00910: Nitrogen metabolism; ko01100: Metabolic pathways
TraesCS6A02G317500	1.30218	0.0139508	0.0405187	up	K23452 UDP-glucosyltransferase 85A [EC:2.4.1.-] | (RefSeq) UDP-glycosyltransferase 85A5-like (A)	ko00908: Zeatin biosynthesis; ko01110: Biosynthesis of secondary metabolites
TraesCS6A02G316900	-8.54298	1.87 × 10-49	1.15 × 10-46	down	K00020 3-hydroxyisobutyrate dehydrogenase [EC:1.1.1.31] | (GenBank) 6-phosphogluconate dehydrogenase-like protein (A)	ko00280: Valine, leucine and isoleucine degradation; ko01100: Metabolic pathways
TraesCS6A02G316800	-7.96552	4.24605e-07	4.62663e-06	down	K00020 3-hydroxyisobutyrate dehydrogenase [EC:1.1.1.31] | (GenBank) 6-phosphogluconate dehydrogenase-like protein (A)	ko00280: Valine, leucine and isoleucine degradation; ko01100: Metabolic pathways
TraesCS6A02G316700	-7.77773	4.81 × 10-49	2.80 × 10-46	down	K00020 3-hydroxyisobutyrate dehydrogenase [EC:1.1.1.31] | (GenBank) 6-phosphogluconate dehydrogenase-like protein (A)	ko00280: Valine, leucine and isoleucine degradation; ko01100: Metabolic pathways
TraesCS6A02G316600	-9.76172	8.08 × 10-63	1.17 × 10-49	down	K00020 3-hydroxyisobutyrate dehydrogenase [EC:1.1.1.31] | (GenBank) 6-phosphogluconate dehydrogenase-like protein (A)	ko00280: Valine, leucine and isoleucine degradation; ko01100: Metabolic pathways
TraesCS6A02G316200	-2.90925	1.54933e-16	7.05907e-15	down	K13993 HSP20 family protein | (RefSeq) 24.1 kDa heat shock protein, mitochondrial-like (A)	ko04141: Protein processing in endoplasmic reticulum
TraesCS6A02G311400	1.56619	4.89032e-14	1.6736e-12	up	K14012 UBX domain-containing protein 1 | (RefSeq) ATPase family gene 2 protein (A)	ko04141: Protein processing in endoplasmic reticulum
TraesCS6A02G310600	-1.71236	0.00623896	0.0209651	down	K01859 chalcone isomerase [EC:5.5.1.6] | (RefSeq) vacuolar-sorting receptor 1 (A)	ko00941: Flavonoid biosynthesis; ko01100: Metabolic pathways; ko01110: Biosynthesis of secondary metabolites
TraesCS6A02G309400	-2.04158	5.95911e-07	6.29822e-06	down	K15639 PHYB activation tagged suppressor 1 [EC:1.14.-.-] | (RefSeq) cytochrome P450 734A1-like (A)	ko00905: Brassinosteroid biosynthesis; ko01110: Biosynthesis of secondary metabolites
TraesCS6A02G305400	1.34144	2.7329e-10	5.40818e-09	up	K00891 shikimate kinase [EC:2.7.1.71] | (RefSeq) shikimate kinase 1, chloroplastic-like (A)	ko00400: Phenylalanine, tyrosine and tryptophan biosynthesis; ko01100: Metabolic pathways; ko01110: Biosynthesis of secondary metabolites; ko01230: Biosynthesis of amino acids
TraesCS6A02G301800	-3.90437	2.06565e-05	0.000150759	down	K01087 trehalose 6-phosphate phosphatase [EC:3.1.3.12] | (RefSeq) probable trehalose-phosphate phosphatase 4 (A)	ko00500: Starch and sucrose metabolism; ko01100: Metabolic pathways; ko01110: Biosynthesis of secondary metabolites
TraesCS6A02G298400	3.72256	1.60705e-12	4.46552e-11	up	K17212 bisdemethoxycurcumin synthase [EC:2.3.1.211] | (RefSeq) bisdemethoxycurcumin synthase-like (A)	ko00945: Stilbenoid, diarylheptanoid and gingerol biosynthesis; ko01110: Biosynthesis of secondary metabolites
TraesCS6A02G297400	-2.05177	4.80317e-11	1.07634e-09	down	K00799 glutathione S-transferase [EC:2.5.1.18] | (RefSeq) glutathione S-transferase F12-like (A)	ko00480: Glutathione metabolism; ko01100: Metabolic pathways
TraesCS6A02G293600	-3.43363	8.56208e-08	1.07433e-06	down	K10260 F-box and WD-40 domain protein 7 | (RefSeq) uncharacterized protein (A)	ko04120: Ubiquitin mediated proteolysis
TraesCS6A02G286200	1.34778	0.0149766	0.0429427	up	K03012 DNA-directed RNA polymerase II subunit RPB4 | (RefSeq) DNA-directed RNA polymerases IV and V subunit 4-like isoform X1 (A)	ko03020: RNA polymerase
TraesCS6A02G284700	-1.74766	7.88934e-13	2.28232e-11	down	K11584 serine/threonine-protein phosphatase 2A regulatory subunit B' | (RefSeq) serine/threonine protein phosphatase 2A 57 kDa regulatory subunit B' beta isoform-like (A)	ko03015: mRNA surveillance pathway
TraesCS6A02G282900	1.84044	0.00518876	0.0179695	up	K13420 LRR receptor-like serine/threonine-protein kinase FLS2 [EC:2.7.11.1] | (RefSeq) LRR receptor-like serine/threonine-protein kinase FLS2 (A)	ko04016: MAPK signaling pathway - plant; ko04626: Plant-pathogen interaction
TraesCS6A02G271300	1.74206	1.02446e-09	1.82783e-08	up	K09843 (+)-abscisic acid 8'-hydroxylase [EC:1.14.14.137] | (RefSeq) abscisic acid 8'-hydroxylase 1-like (A)	ko00906: Carotenoid biosynthesis; ko01110: Biosynthesis of secondary metabolites
TraesCS6A02G266700	-2.86484	0.000787909	0.00366608	down	K01904 4-coumarate--CoA ligase [EC:6.2.1.12] | (RefSeq) 4-coumarate--CoA ligase 2-like (A)	ko00130: Ubiquinone and other terpenoid-quinone biosynthesis; ko00940: Phenylpropanoid biosynthesis; ko01100: Metabolic pathways; ko01110: Biosynthesis of secondary metabolites
TraesCS6A02G266000	-1.99753	0.000143965	0.000833587	down	K08770 ubiquitin C | (RefSeq) LOW QUALITY PROTEIN: polyubiquitin 4 (A)	ko04120: Ubiquitin mediated proteolysis
TraesCS6A02G264900	-2.03794	0.000736233	0.00345206	down	K05658 ATP-binding cassette, subfamily B (MDR/TAP), member 1 [EC:7.6.2.2] | (RefSeq) ABC transporter B family member 2-like (A)	ko02010: ABC transporters
TraesCS6A02G263200	1.47288	0.00370703	0.0135749	up	K02881 large subunit ribosomal protein L18 | (RefSeq) 39S ribosomal protein L18, mitochondrial-like (A)	ko03010: Ribosome
TraesCS6A02G260300	1.03981	1.98453e-05	0.000145614	up	K14315 nucleoporin NDC1 | (RefSeq) uncharacterized protein LOC119317450 (A)	ko03013: Nucleocytoplasmic transport
TraesCS6A02G258900	3.1729	1.26464e-15	5.1955e-14	up	K13429 chitin elicitor receptor kinase 1 | (RefSeq) lysM domain receptor-like kinase 3 (A)	ko04626: Plant-pathogen interaction
TraesCS6A02G258000	-2.86411	1.00538e-10	2.12476e-09	down	K01870 isoleucyl-tRNA synthetase [EC:6.1.1.5] | (RefSeq) hypothetical protein (A)	ko00970: Aminoacyl-tRNA biosynthesis
TraesCS6A02G253600	1.78084	0.0017721	0.00726526	up	K03029 26S proteasome regulatory subunit N10 | (RefSeq) 26S proteasome non-ATPase regulatory subunit 4 homolog (A)	ko03050: Proteasome
TraesCS6A02G250800	1.04901	1.70472e-08	2.44596e-07	up	K09503 DnaJ homolog subfamily A member 2 | (RefSeq) chaperone protein dnaJ A6-like (A)	ko04141: Protein processing in endoplasmic reticulum
TraesCS6A02G248500	1.15344	0.000488107	0.00242197	up	K13337 peroxin-19 | (RefSeq) peroxisome biogenesis protein 19-1-like isoform X1 (A)	ko04146: Peroxisome
TraesCS6A02G248400	-7.71217	1.79106e-08	2.55887e-07	down	K01087 trehalose 6-phosphate phosphatase [EC:3.1.3.12] | (RefSeq) probable trehalose-phosphate phosphatase 1 (A)	ko00500: Starch and sucrose metabolism; ko01100: Metabolic pathways; ko01110: Biosynthesis of secondary metabolites
TraesCS6A02G248000	-1.36788	1.04546e-06	1.04919e-05	down	K00789 S-adenosylmethionine synthetase [EC:2.5.1.6] | (RefSeq) S-adenosylmethionine synthase 3 (A)	ko00270: Cysteine and methionine metabolism; ko00999: Biosynthesis of various plant secondary metabolites; ko01100: Metabolic pathways; ko01110: Biosynthesis of secondary metabolites; ko01230: Biosynthesis of amino acids; ko01240: Biosynthesis of cofactors
TraesCS6A02G247900	-1.36909	5.8088e-06	4.91245e-05	down	K00789 S-adenosylmethionine synthetase [EC:2.5.1.6] | (RefSeq) S-adenosylmethionine synthase 2 (A)	ko00270: Cysteine and methionine metabolism; ko00999: Biosynthesis of various plant secondary metabolites; ko01100: Metabolic pathways; ko01110: Biosynthesis of secondary metabolites; ko01230: Biosynthesis of amino acids; ko01240: Biosynthesis of cofactors
TraesCS6A02G245200	1.15323	7.37498e-07	7.6318e-06	up	K21232 molybdopterin synthase sulfur carrier subunit | (RefSeq) molybdopterin synthase sulfur carrier subunit-like (A)	ko04122: Sulfur relay system
TraesCS6A02G244900	-4.39339	3.83209e-09	6.23983e-08	down	K15398 fatty acid omega-hydroxylase [EC:1.14.-.-] | (RefSeq) cytochrome P450 86A2-like (A)	ko00073: Cutin, suberine and wax biosynthesis; ko01100: Metabolic pathways
TraesCS6A02G243100	-1.09449	0.00743624	0.0242628	down	K03029 26S proteasome regulatory subunit N10 | (RefSeq) 26S proteasome non-ATPase regulatory subunit 4 homolog (A)	ko03050: Proteasome
TraesCS6A02G239600	-2.01042	0.00294644	0.0111838	down	K00128 aldehyde dehydrogenase (NAD+) [EC:1.2.1.3] | (RefSeq) aldehyde dehydrogenase family 3 member F1-like (A)	ko00010: Glycolysis / Gluconeogenesis; ko00053: Ascorbate and aldarate metabolism; ko00071: Fatty acid degradation; ko00280: Valine, leucine and isoleucine degradation; ko00310: Lysine degradation; ko00330: Arginine and proline metabolism; ko00340: Histidine metabolism; ko00380: Tryptophan metabolism; ko00410: beta-Alanine metabolism; ko00561: Glycerolipid metabolism; ko00620: Pyruvate metabolism…
TraesCS6A02G238900	1.35827	0.00249116	0.00971089	up	K08331 autophagy-related protein 13 | (RefSeq) autophagy-related protein 13a-like (A)	ko04136: Autophagy - other
TraesCS6A02G238300	-2.14079	0.00250212	0.00974363	down	K14488 SAUR family protein | (RefSeq) auxin-responsive protein SAUR36-like (A)	ko04075: Plant hormone signal transduction
TraesCS6A02G234300	-1.64876	1.4502e-05	0.000110544	down	K09291 nucleoprotein TPR | (RefSeq) LOW QUALITY PROTEIN: nuclear-pore anchor (A)	ko03013: Nucleocytoplasmic transport
TraesCS6A02G234000	-1.28748	0.000153307	0.000879964	down	K12623 U6 snRNA-associated Sm-like protein LSm4 | (RefSeq) putative U6 snRNA-associated Sm-like protein LSm4 (A)	ko03018: RNA degradation; ko03040: Spliceosome
TraesCS6A02G228100	-1.30085	0.00346448	0.012837	down	K00962 polyribonucleotide nucleotidyltransferase [EC:2.7.7.8] | (RefSeq) polyribonucleotide nucleotidyltransferase 2, mitochondrial-like (A)	ko03018: RNA degradation
TraesCS6A02G226500	2.11519	0.000308087	0.001622	up	K15404 aldehyde decarbonylase [EC:4.1.99.5] | (RefSeq) very-long-chain aldehyde decarbonylase GL1-4-like (A)	ko00073: Cutin, suberine and wax biosynthesis; ko01110: Biosynthesis of secondary metabolites
TraesCS6A02G226200	-4.757	4.15469e-06	3.61886e-05	down	K14488 SAUR family protein | (RefSeq) auxin-responsive protein SAUR32 (A)	ko04075: Plant hormone signal transduction
TraesCS6A02G225500	-1.75075	0.0122143	0.0363776	down	K03859 phosphatidylinositol N-acetylglucosaminyltransferase subunit C | (RefSeq) phosphatidylinositol N-acetylglucosaminyltransferase subunit C-like (A)	ko00563: Glycosylphosphatidylinositol (GPI)-anchor biosynthesis; ko01100: Metabolic pathways
TraesCS6A02G225400	3.73289	6.72321e-08	8.59486e-07	up	K05391 cyclic nucleotide gated channel, plant | (RefSeq) cyclic nucleotide-gated ion channel 1-like (A)	ko04626: Plant-pathogen interaction
TraesCS6A02G223700	1.1046	1.07692e-05	8.48748e-05	up	K12119 cryptochrome 2 | (RefSeq) cryptochrome-1-like (A)	ko04712: Circadian rhythm - plant
TraesCS6A02G221400	-1.10856	4.28715e-06	3.72695e-05	down	K12489 Arf-GAP with coiled-coil, ANK repeat and PH domain-containing protein | (RefSeq) ADP-ribosylation factor GTPase-activating protein AGD2-like isoform X1 (A)	ko04144: Endocytosis
TraesCS6A02G220400	-1.60379	0.00215382	0.00857076	down	K07375 tubulin beta | (RefSeq) uncharacterized protein LOC123070672 isoform X1 (A)	ko04145: Phagosome
TraesCS6A02G218300	-1.96385	0.000554528	0.00270611	down	K01653 acetolactate synthase I/III small subunit [EC:2.2.1.6] | (RefSeq) acetolactate synthase small subunit 2, chloroplastic-like isoform X1 (A)	ko00290: Valine, leucine and isoleucine biosynthesis; ko00650: Butanoate metabolism; ko00660: C5-Branched dibasic acid metabolism; ko00770: Pantothenate and CoA biosynthesis; ko01100: Metabolic pathways; ko01110: Biosynthesis of secondary metabolites; ko01210: 2-Oxocarboxylic acid metabolism; ko01230: Biosynthesis of amino acids
TraesCS6A02G217400	-1.03037	0.00128903	0.00554353	down	K05681 ATP-binding cassette, subfamily G (WHITE), member 2 | (RefSeq) hypothetical protein (A)	ko02010: ABC transporters
TraesCS6A02G215500	1.23352	0.000497021	0.00246071	up	K03526 (E)-4-hydroxy-3-methylbut-2-enyl-diphosphate synthase [EC:1.17.7.1 1.17.7.3] | (RefSeq) 4-hydroxy-3-methylbut-2-en-1-yl diphosphate synthase (ferredoxin), chloroplastic-like (A)	ko00900: Terpenoid backbone biosynthesis; ko01100: Metabolic pathways; ko01110: Biosynthesis of secondary metabolites
TraesCS6A02G213400	2.19795	3.73726e-06	3.29234e-05	up	K00228 coproporphyrinogen III oxidase [EC:1.3.3.3] | (RefSeq) oxygen-dependent coproporphyrinogen-III oxidase, chloroplastic-like (A)	ko00860: Porphyrin metabolism; ko01100: Metabolic pathways; ko01110: Biosynthesis of secondary metabolites; ko01240: Biosynthesis of cofactors
TraesCS6A02G212000	2.14674	2.79612e-08	3.87472e-07	up	K05391 cyclic nucleotide gated channel, plant | (RefSeq) protein CNGC15b-like (A)	ko04626: Plant-pathogen interaction
TraesCS6A02G210500	-5.12188	2.33799e-29	3.41692e-27	down	K15402 fatty acid omega-hydroxylase [EC:1.14.-.-] | (RefSeq) cytochrome P450 86B1 (A)	ko00073: Cutin, suberine and wax biosynthesis
TraesCS6A02G209000	-1.59194	1.61201e-08	2.32228e-07	down	K00737 beta-1,4-mannosyl-glycoprotein beta-1,4-N-acetylglucosaminyltransferase [EC:2.4.1.144] | (RefSeq) beta-1,4-mannosyl-glycoprotein 4-beta-N-acetylglucosaminyltransferase-like (A)	ko00510: N-Glycan biosynthesis; ko01100: Metabolic pathways
TraesCS6A02G203700	1.46605	6.77992e-05	0.000430199	up	K13457 disease resistance protein RPM1 | (RefSeq) uncharacterized protein sll1770 (A)	ko04626: Plant-pathogen interaction
TraesCS6A02G203300	1.35825	0.00249652	0.00972677	up	K12118 cryptochrome 1 | (RefSeq) cryptochrome-1-like (A)	ko04712: Circadian rhythm - plant
TraesCS6A02G203000	1.15511	6.1241e-09	9.63181e-08	up	K12275 translocation protein SEC62 | (RefSeq) uncharacterized protein LOC123127523 (A)	ko03060: Protein export; ko04141: Protein processing in endoplasmic reticulum
TraesCS6A02G202400	-3.17077	0.000289742	0.00153661	down	K10601 E3 ubiquitin-protein ligase synoviolin [EC:2.3.2.27] | (RefSeq) ERAD-associated E3 ubiquitin-protein ligase HRD1-like (A)	ko04120: Ubiquitin mediated proteolysis; ko04141: Protein processing in endoplasmic reticulum
TraesCS6A02G196800	-1.37758	0.00481267	0.0168784	down	K05391 cyclic nucleotide gated channel, plant | (RefSeq) cyclic nucleotide-gated ion channel 1-like isoform X1 (A)	ko04626: Plant-pathogen interaction
TraesCS6A02G189300	1.22156	3.72646e-06	3.28437e-05	up	K06689 ubiquitin-conjugating enzyme E2 D [EC:2.3.2.23] | (RefSeq) ubiquitin-conjugating enzyme E2 E2-like (A)	ko04120: Ubiquitin mediated proteolysis; ko04141: Protein processing in endoplasmic reticulum
TraesCS6A02G187800	-1.38178	3.36437e-10	6.55116e-09	down	K04354 serine/threonine-protein phosphatase 2A regulatory subunit B | (RefSeq) serine/threonine protein phosphatase 2A 55 kDa regulatory subunit B beta isoform isoform X1 (A)	ko03015: mRNA surveillance pathway
TraesCS6A02G187700	1.56193	1.68738e-06	1.61089e-05	up	K14497 protein phosphatase 2C [EC:3.1.3.16] | (RefSeq) protein phosphatase 2C 53-like (A)	ko04016: MAPK signaling pathway - plant; ko04075: Plant hormone signal transduction
TraesCS6A02G181700	-7.02565	1.10 × 10-70	2.69 × 10-67	down	K13993 HSP20 family protein | (RefSeq) 23.6 kDa heat shock protein, mitochondrial-like (A)	ko04141: Protein processing in endoplasmic reticulum
TraesCS6A02G181200	-1.69278	0.00166385	0.0068837	down	K15718 linoleate 9S-lipoxygenase [EC:1.13.11.58] | (RefSeq) probable linoleate 9S-lipoxygenase 4 (A)	ko00591: Linoleic acid metabolism
TraesCS6A02G178500	2.82903	1.76202e-09	3.02376e-08	up	K08711 ATP-binding cassette, subfamily G (WHITE), member 2, PDR | (RefSeq) LOW QUALITY PROTEIN: ZEB2-regulated ABC transporter 1-like (A)	ko02010: ABC transporters
TraesCS6A02G175800	-2.20982	8.24988e-06	6.69657e-05	down	K16241 transcription factor HY5 | (RefSeq) transcription factor HY5-like (A)	ko04712: Circadian rhythm - plant
TraesCS6A02G173600	-2.53047	5.69523e-20	3.87088e-18	down	K23279 gallate 1-beta-glucosyltransferase [EC:2.4.1.136] | (RefSeq) gallate 1-beta-glucosyltransferase-like isoform X1 (A)	ko00999: Biosynthesis of various plant secondary metabolites
TraesCS6A02G171300	-1.82497	1.03793e-06	1.04242e-05	down	K13436 pto-interacting protein 1 [EC:2.7.11.1] | (RefSeq) PTI1-like tyrosine-protein kinase 3 (A)	ko04626: Plant-pathogen interaction
TraesCS6A02G168900	-2.19145	0.000790577	0.00367626	down	K13429 chitin elicitor receptor kinase 1 | (RefSeq) lysM domain receptor-like kinase 3 (A)	ko04626: Plant-pathogen interaction
TraesCS6A02G163500	-1.27789	3.56556e-05	0.000244233	down	K02437 glycine cleavage system H protein | (RefSeq) glycine cleavage system H protein 2, mitochondrial (A)	ko00260: Glycine, serine and threonine metabolism; ko00630: Glyoxylate and dicarboxylate metabolism; ko01100: Metabolic pathways; ko01110: Biosynthesis of secondary metabolites; ko01200: Carbon metabolism
TraesCS6A02G160700	-1.35566	0.0174001	0.0484876	down	K12486 stromal membrane-associated protein | (RefSeq) ADP-ribosylation factor GTPase-activating protein AGD12-like (A)	ko04144: Endocytosis
TraesCS6A02G158900	1.14884	0.000679148	0.00321911	up	K17686 P-type Cu+ transporter [EC:7.2.2.8] | (RefSeq) copper-transporting ATPase HMA4-like (A)	ko04016: MAPK signaling pathway - plant
TraesCS6A02G153500	-3.84393	1.12747e-06	1.1224e-05	down	K10583 ubiquitin-conjugating enzyme E2 S [EC:2.3.2.23] | (RefSeq) ubiquitin-conjugating enzyme E2 22-like isoform X1 (A)	ko04120: Ubiquitin mediated proteolysis
TraesCS6A02G153400	1.71861	5.12445e-11	1.14306e-09	up	K01489 cytidine deaminase [EC:3.5.4.5] | (RefSeq) cytidine deaminase 1-like (A)	ko00240: Pyrimidine metabolism; ko01100: Metabolic pathways; ko01232: Nucleotide metabolism
TraesCS6A02G153100	-1.67619	0.0129415	0.0381284	down	K10615 E3 ubiquitin-protein ligase HERC4 [EC:2.3.2.26] | (RefSeq) probable E3 ubiquitin-protein ligase HERC4 isoform X1 (A)	ko04120: Ubiquitin mediated proteolysis
TraesCS6A02G151700	-3.8391	6.12227e-17	2.93441e-15	down	K01904 4-coumarate--CoA ligase [EC:6.2.1.12] | (RefSeq) probable 4-coumarate--CoA ligase 3 (A)	ko00130: Ubiquinone and other terpenoid-quinone biosynthesis; ko00940: Phenylpropanoid biosynthesis; ko01100: Metabolic pathways; ko01110: Biosynthesis of secondary metabolites
TraesCS6A02G149200	2.31081	1.56899e-05	0.000118455	up	K07456 DNA mismatch repair protein MutS2 | (RefSeq) uncharacterized protein LOC110766748 (A)	ko03430: Mismatch repair
TraesCS6A02G148700	-1.58306	0.000503915	0.00249047	down	K07456 DNA mismatch repair protein MutS2 | (RefSeq) uncharacterized protein LOC110766748 (A)	ko03430: Mismatch repair
TraesCS6A02G147100	1.99131	1.50254e-05	0.000114115	up	K08486 syntaxin 1B/2/3 | (RefSeq) syntaxin-related protein KNOLLE-like (A)	ko04130: SNARE interactions in vesicular transport
TraesCS6A02G147000	1.09152	7.17429e-07	7.44573e-06	up	K14153 hydroxymethylpyrimidine kinase / phosphomethylpyrimidine kinase / thiamine-phosphate diphosphorylase [EC:2.7.1.49 2.7.4.7 2.5.1.3] | (RefSeq) probable thiamine biosynthetic bifunctional enzyme, chloroplastic (A)	ko00730: Thiamine metabolism; ko01100: Metabolic pathways; ko01240: Biosynthesis of cofactors
TraesCS6A02G146600	-2.16779	0.000464603	0.00232094	down	K02149 V-type H+-transporting ATPase subunit D | (RefSeq) V-type proton ATPase subunit D-like (A)	ko00190: Oxidative phosphorylation; ko01100: Metabolic pathways; ko04145: Phagosome
TraesCS6A02G141500	1.60741	3.99613e-09	6.48325e-08	up	K00457 4-hydroxyphenylpyruvate dioxygenase [EC:1.13.11.27] | (RefSeq) 4-hydroxyphenylpyruvate dioxygenase-like (A)	ko00130: Ubiquinone and other terpenoid-quinone biosynthesis; ko00350: Tyrosine metabolism; ko00360: Phenylalanine metabolism; ko01100: Metabolic pathways; ko01240: Biosynthesis of cofactors
TraesCS6A02G141200	-3.43145	5.18669e-05	0.000340246	down	K14488 SAUR family protein | (RefSeq) auxin-responsive protein SAUR71-like (A)	ko04075: Plant hormone signal transduction
TraesCS6A02G140300	-1.45389	0.00934102	0.0291614	down	K05681 ATP-binding cassette, subfamily G (WHITE), member 2 | (RefSeq) ABC transporter, ATP-binding protein isoform 1 (A)	ko02010: ABC transporters
TraesCS6A02G140200	-3.50525	2.31506e-09	3.91504e-08	down	K01011 thiosulfate/3-mercaptopyruvate sulfurtransferase [EC:2.8.1.1 2.8.1.2] | (RefSeq) thiosulfate/3-mercaptopyruvate sulfurtransferase 1, mitochondrial-like (A)	ko00270: Cysteine and methionine metabolism; ko00920: Sulfur metabolism; ko01100: Metabolic pathways; ko04122: Sulfur relay system
TraesCS6A02G139900	1.44992	7.62217e-07	7.86022e-06	up	K01942 biotin---protein ligase [EC:6.3.4.9 6.3.4.10 6.3.4.11 6.3.4.15] | (RefSeq) biotin--protein ligase 2-like (A)	ko00780: Biotin metabolism; ko01100: Metabolic pathways
TraesCS6A02G139400	1.27759	0.00070509	0.00332498	up	K13430 serine/threonine-protein kinase PBS1 [EC:2.7.11.1] | (RefSeq) serine/threonine-protein kinase PBS1-like (A)	ko04626: Plant-pathogen interaction
TraesCS6A02G138500	1.00798	5.92002e-05	0.000381199	up	K13719 ubiquitin thioesterase OTU1 [EC:3.1.2.-] | (RefSeq) OVARIAN TUMOR DOMAIN-containing deubiquitinating enzyme 2-like (A)	ko04141: Protein processing in endoplasmic reticulum
TraesCS6A02G130100	3.66525	1.59441e-17	8.03819e-16	up	K13223 indole-2-monooxygenase [EC:1.14.14.153] | (RefSeq) indole-2-monooxygenase-like (A)	ko00402: Benzoxazinoid biosynthesis; ko01110: Biosynthesis of secondary metabolites
TraesCS6A02G118300	-1.54467	6.52392e-05	0.000416326	down	K00430 peroxidase [EC:1.11.1.7] | (RefSeq) peroxidase P7-like (A)	ko00940: Phenylpropanoid biosynthesis; ko01100: Metabolic pathways; ko01110: Biosynthesis of secondary metabolites
TraesCS6A02G112800	1.4556	0.00662057	0.022026	up	K12446 L-arabinokinase [EC:2.7.1.46] | (RefSeq) L-arabinokinase (A)	ko00520: Amino sugar and nucleotide sugar metabolism; ko01100: Metabolic pathways; ko01250: Biosynthesis of nucleotide sugars
TraesCS6A02G110000	-1.07537	0.00640248	0.0214284	down	K19893 glucan endo-1,3-beta-glucosidase 5/6 [EC:3.2.1.39] | (RefSeq) glucan endo-1,3-beta-glucosidase 6-like (A)	ko00500: Starch and sucrose metabolism; ko01100: Metabolic pathways
TraesCS6A02G107900	1.93956	0.000943844	0.00426476	up	K01698 porphobilinogen synthase [EC:4.2.1.24] | (RefSeq) delta-aminolevulinic acid dehydratase, chloroplastic-like (A)	ko00860: Porphyrin metabolism; ko01100: Metabolic pathways; ko01110: Biosynthesis of secondary metabolites; ko01240: Biosynthesis of cofactors
TraesCS6A02G107300	1.16158	0.000652281	0.00311177	up	K04498 E1A/CREB-binding protein [EC:2.3.1.48] | (RefSeq) probable histone acetyltransferase HAC-like 1 (A)	ko03250: Viral life cycle - HIV-1
TraesCS6A02G104900	1.69662	1.50608e-06	1.45757e-05	up	K01513 ectonucleotide pyrophosphatase/phosphodiesterase family member 1/3 [EC:3.1.4.1 3.6.1.9] | (RefSeq) uncharacterized protein LOC109769794 (A)	ko00230: Purine metabolism; ko00240: Pyrimidine metabolism; ko00500: Starch and sucrose metabolism; ko00740: Riboflavin metabolism; ko00760: Nicotinate and nicotinamide metabolism; ko00770: Pantothenate and CoA biosynthesis; ko01100: Metabolic pathways; ko01110: Biosynthesis of secondary metabolites; ko01232: Nucleotide metabolism
TraesCS6A02G101900	-1.61683	2.68203e-17	1.32223e-15	down	K08054 calnexin | (RefSeq) calnexin homolog (A)	ko04141: Protein processing in endoplasmic reticulum; ko04145: Phagosome
TraesCS6A02G101800	-1.55177	0.000186747	0.00104751	down	K08054 calnexin | (RefSeq) calnexin homolog (A)	ko04141: Protein processing in endoplasmic reticulum; ko04145: Phagosome
TraesCS6A02G099200	1.43222	0.000568546	0.00276447	up	K00278 L-aspartate oxidase [EC:1.4.3.16] | (RefSeq) L-aspartate oxidase, chloroplastic (A)	ko00250: Alanine, aspartate and glutamate metabolism; ko00760: Nicotinate and nicotinamide metabolism; ko01100: Metabolic pathways; ko01240: Biosynthesis of cofactors
TraesCS6A02G096100	-1.46989	0.00883673	0.0278849	down	K10728 topoisomerase (DNA) II binding protein 1 | (RefSeq) BRCT domain-containing protein At4g02110-like (A)	ko03440: Homologous recombination
TraesCS6A02G086800	1.24476	4.96375e-10	9.39861e-09	up	K04506 E3 ubiquitin-protein ligase SIAH1 [EC:2.3.2.27] | (RefSeq) E3 ubiquitin-protein ligase SINAT2-like (A)	ko04120: Ubiquitin mediated proteolysis
TraesCS6A02G085400	1.66261	0.00635989	0.0213179	up	K03363 cell division cycle 20, cofactor of APC complex | (RefSeq) cell division cycle 20.2, cofactor of APC complex-like (A)	ko04120: Ubiquitin mediated proteolysis
TraesCS6A02G083400	1.13939	2.69789e-07	3.07631e-06	up	K13176 THO complex subunit 7 | (RefSeq) THO complex subunit 7B-like (A)	ko03013: Nucleocytoplasmic transport
TraesCS6A02G080600	1.64277	2.07507e-13	6.49475e-12	up	K01703 3-isopropylmalate/(R)-2-methylmalate dehydratase large subunit [EC:4.2.1.33 4.2.1.35] | (RefSeq) 3-isopropylmalate dehydratase large subunit, chloroplastic-like (A)	ko00290: Valine, leucine and isoleucine biosynthesis; ko00660: C5-Branched dibasic acid metabolism; ko00966: Glucosinolate biosynthesis; ko01100: Metabolic pathways; ko01110: Biosynthesis of secondary metabolites; ko01210: 2-Oxocarboxylic acid metabolism; ko01230: Biosynthesis of amino acids
TraesCS6A02G077100	1.23399	0.000450531	0.00225941	up	K01681 aconitate hydratase [EC:4.2.1.3] | (RefSeq) putative aconitate hydratase, cytoplasmic (A)	ko00020: Citrate cycle (TCA cycle); ko00630: Glyoxylate and dicarboxylate metabolism; ko01100: Metabolic pathways; ko01110: Biosynthesis of secondary metabolites; ko01200: Carbon metabolism; ko01210: 2-Oxocarboxylic acid metabolism; ko01230: Biosynthesis of amino acids
TraesCS6A02G074100	1.08815	0.000213743	0.00117782	up	K18532 adenylate kinase [EC:2.7.4.3] | (RefSeq) adenylate kinase isoenzyme 6 homolog (A)	ko00230: Purine metabolism; ko01100: Metabolic pathways; ko01110: Biosynthesis of secondary metabolites; ko01232: Nucleotide metabolism; ko01240: Biosynthesis of cofactors; ko03008: Ribosome biogenesis in eukaryotes
TraesCS6A02G073700	1.47917	0.00885829	0.0279414	up	K01681 aconitate hydratase [EC:4.2.1.3] | (RefSeq) putative aconitate hydratase, cytoplasmic (A)	ko00020: Citrate cycle (TCA cycle); ko00630: Glyoxylate and dicarboxylate metabolism; ko01100: Metabolic pathways; ko01110: Biosynthesis of secondary metabolites; ko01200: Carbon metabolism; ko01210: 2-Oxocarboxylic acid metabolism; ko01230: Biosynthesis of amino acids
TraesCS6A02G070700	1.12937	0.00114259	0.00500675	up	K04392 Ras-related C3 botulinum toxin substrate 1 | (RefSeq) rac-like GTP-binding protein 6 (A)	ko04145: Phagosome
TraesCS6A02G061000	1.83068	0.000706039	0.00332844	up	K01681 aconitate hydratase [EC:4.2.1.3] | (RefSeq) putative aconitate hydratase, cytoplasmic (A)	ko00020: Citrate cycle (TCA cycle); ko00630: Glyoxylate and dicarboxylate metabolism; ko01100: Metabolic pathways; ko01110: Biosynthesis of secondary metabolites; ko01200: Carbon metabolism; ko01210: 2-Oxocarboxylic acid metabolism; ko01230: Biosynthesis of amino acids
TraesCS6A02G059700	2.14064	2.8842e-14	1.01352e-12	up	K13227 UDP-glucosyltransferase BX8/BX9 [EC:2.4.1.202] | (RefSeq) DIMBOA UDP-glucosyltransferase BX8-like (A)	ko00402: Benzoxazinoid biosynthesis; ko01110: Biosynthesis of secondary metabolites
TraesCS6A02G059300	1.86501	2.569e-11	6.02172e-10	up	K13227 UDP-glucosyltransferase BX8/BX9 [EC:2.4.1.202] | (RefSeq) DIMBOA UDP-glucosyltransferase BX8-like (A)	ko00402: Benzoxazinoid biosynthesis; ko01110: Biosynthesis of secondary metabolites
TraesCS6A02G050300	1.24417	3.47596e-05	0.000238839	up	K08339 autophagy-related protein 5 | (RefSeq) autophagy protein 5-like (A)	ko04136: Autophagy - other
TraesCS6A02G045200	1.11691	0.00117013	0.00511276	up	K11153 retinol dehydrogenase 12 [EC:1.1.1.300] | (RefSeq) retinol dehydrogenase 12-like (A)	ko01100: Metabolic pathways; ko01240: Biosynthesis of cofactors
TraesCS6A02G042600	-2.28004	5.17078e-29	7.43508e-27	down	K09490 endoplasmic reticulum chaperone BiP [EC:3.6.4.10] | (RefSeq) luminal-binding protein 2 (A)	ko03060: Protein export; ko04141: Protein processing in endoplasmic reticulum
TraesCS6A02G033400	2.83241	3.91324e-08	5.254e-07	up	K13258 2-hydroxyisoflavanone dehydratase [EC:4.2.1.105] | (RefSeq) uncharacterized protein LOC115994703 (A)	ko00943: Isoflavonoid biosynthesis; ko01100: Metabolic pathways; ko01110: Biosynthesis of secondary metabolites
TraesCS6A02G033300	1.6341	8.27198e-06	6.71017e-05	up	K18054 2'-deoxymugineic-acid 2'-dioxygenase / mugineic-acid 3-dioxygenase [EC:1.14.11.24 1.14.11.25] | (RefSeq) 2'-deoxymugineic-acid 2'-dioxygenase-like (A)	ko00999: Biosynthesis of various plant secondary metabolites; ko01100: Metabolic pathways; ko01110: Biosynthesis of secondary metabolites
TraesCS6A02G006600	2.49966	0.00068114	0.00322712	up	K01681 aconitate hydratase [EC:4.2.1.3] | (RefSeq) putative aconitate hydratase, cytoplasmic (A)	ko00020: Citrate cycle (TCA cycle); ko00630: Glyoxylate and dicarboxylate metabolism; ko01100: Metabolic pathways; ko01110: Biosynthesis of secondary metabolites; ko01200: Carbon metabolism; ko01210: 2-Oxocarboxylic acid metabolism; ko01230: Biosynthesis of amino acids
TraesCS5D02G568300	1.48239	3.53159e-09	5.80174e-08	up	K14290 exportin-1 | (RefSeq) protein EXPORTIN 1A-like isoform X1 (A)	ko03008: Ribosome biogenesis in eukaryotes; ko03013: Nucleocytoplasmic transport; ko03250: Viral life cycle - HIV-1
TraesCS5D02G564000	2.65847	0.00349686	0.012931	up	K08711 ATP-binding cassette, subfamily G (WHITE), member 2, PDR | (RefSeq) ZEB2-regulated ABC transporter 1-like (A)	ko02010: ABC transporters
TraesCS5D02G556800	1.11542	0.00472931	0.0166405	up	K12193 charged multivesicular body protein 3 | (RefSeq) vacuolar protein sorting-associated protein 24 homolog 1-like (A)	ko04144: Endocytosis
TraesCS5D02G548500	-1.52776	0.0180334	0.0499201	down	K13457 disease resistance protein RPM1 | (RefSeq) disease resistance protein RPM1 (A)	ko04626: Plant-pathogen interaction
TraesCS5D02G540800	1.14241	5.71313e-07	6.0646e-06	up	K09753 cinnamoyl-CoA reductase [EC:1.2.1.44] | (RefSeq) cinnamoyl-CoA reductase 1-like (A)	ko00940: Phenylpropanoid biosynthesis; ko01100: Metabolic pathways; ko01110: Biosynthesis of secondary metabolites
TraesCS5D02G538300	-4.83581	3.36851e-19	2.06394e-17	down	K14399 polyribonucleotide 5'-hydroxyl-kinase [EC:2.7.1.78] | (RefSeq) Clp1-domain-containing protein (A)	ko03015: mRNA surveillance pathway
TraesCS5D02G531600	1.36023	1.08046e-10	2.27177e-09	up	K03217 YidC/Oxa1 family membrane protein insertase | (RefSeq) inner membrane protein PPF-1, chloroplastic-like (A)	ko03060: Protein export
TraesCS5D02G531200	1.44211	1.43193e-09	2.49492e-08	up	K13436 pto-interacting protein 1 [EC:2.7.11.1] | (RefSeq) PTI1-like tyrosine-protein kinase 1 (A)	ko04626: Plant-pathogen interaction
TraesCS5D02G522200	1.31562	0.000102088	0.000616747	up	K06126 ubiquinone biosynthesis monooxygenase Coq6 [EC:1.14.13.-] | (RefSeq) ubiquinone biosynthesis monooxygenase COQ6, mitochondrial-like isoform X1 (A)	ko00130: Ubiquinone and other terpenoid-quinone biosynthesis; ko01100: Metabolic pathways; ko01110: Biosynthesis of secondary metabolites; ko01240: Biosynthesis of cofactors
TraesCS5D02G521900	1.38895	0.0016472	0.00682644	up	K13457 disease resistance protein RPM1 | (RefSeq) disease resistance protein RPM1 (A)	ko04626: Plant-pathogen interaction
TraesCS5D02G520200	1.37594	0.0033383	0.0124341	up	K13430 serine/threonine-protein kinase PBS1 [EC:2.7.11.1] | (RefSeq) serine/threonine-protein kinase PBS1-like (A)	ko04626: Plant-pathogen interaction
TraesCS5D02G518600	1.22313	4.47811e-09	7.20403e-08	up	K06126 ubiquinone biosynthesis monooxygenase Coq6 [EC:1.14.13.-] | (RefSeq) ubiquinone biosynthesis monooxygenase COQ6, mitochondrial isoform X1 (A)	ko00130: Ubiquinone and other terpenoid-quinone biosynthesis; ko01100: Metabolic pathways; ko01110: Biosynthesis of secondary metabolites; ko01240: Biosynthesis of cofactors
TraesCS5D02G516400	8.42102	7.72307e-09	1.18675e-07	up	K09843 (+)-abscisic acid 8'-hydroxylase [EC:1.14.14.137] | (RefSeq) abscisic acid 8'-hydroxylase 1 isoform X2 (A)	ko00906: Carotenoid biosynthesis; ko01110: Biosynthesis of secondary metabolites
TraesCS5D02G507000	1.25729	2.0099e-10	4.07232e-09	up	K08726 soluble epoxide hydrolase / lipid-phosphate phosphatase [EC:3.3.2.10 3.1.3.76] | (RefSeq) uncharacterized protein LOC119283936 (A)	ko00590: Arachidonic acid metabolism; ko01100: Metabolic pathways; ko04146: Peroxisome
TraesCS5D02G506900	1.56215	8.89511e-09	1.35094e-07	up	K01557 acylpyruvate hydrolase [EC:3.7.1.5] | (RefSeq) probable acylpyruvase FAHD2, mitochondrial (A)	ko00350: Tyrosine metabolism; ko01100: Metabolic pathways
TraesCS5D02G504800	3.23453	7.96696e-14	2.64363e-12	up	K19355 mannan endo-1,4-beta-mannosidase [EC:3.2.1.78] | (RefSeq) mannan endo-1,4-beta-mannosidase 3-like (A)	ko00051: Fructose and mannose metabolism; ko01100: Metabolic pathways
TraesCS5D02G504400	-4.46656	5.6529e-11	1.25096e-09	down	K04506 E3 ubiquitin-protein ligase SIAH1 [EC:2.3.2.27] | (RefSeq) uncharacterized protein LOC123126038 isoform X1 (A)	ko04120: Ubiquitin mediated proteolysis
TraesCS5D02G503400	-1.01023	0.00141589	0.00601885	down	K09291 nucleoprotein TPR | (RefSeq) LOW QUALITY PROTEIN: nuclear-pore anchor (A)	ko03013: Nucleocytoplasmic transport
TraesCS5D02G501100	1.10537	7.38111e-08	9.36914e-07	up	K14500 BR-signaling kinase [EC:2.7.11.1] | (RefSeq) probable serine/threonine-protein kinase At5g41260 (A)	ko04075: Plant hormone signal transduction
TraesCS5D02G501000	1.97511	1.92464e-07	2.26162e-06	up	K13227 UDP-glucosyltransferase BX8/BX9 [EC:2.4.1.202] | (RefSeq) DIMBOA UDP-glucosyltransferase BX8-like (A)	ko00402: Benzoxazinoid biosynthesis; ko01110: Biosynthesis of secondary metabolites
TraesCS5D02G497800	1.71103	0.00963401	0.0299182	up	K01427 urease [EC:3.5.1.5] | (RefSeq) urease-like (A)	ko00220: Arginine biosynthesis; ko00230: Purine metabolism; ko01100: Metabolic pathways
TraesCS5D02G496000	-1.47017	7.5236e-17	3.56139e-15	down	K09562 hsp70-interacting protein | (RefSeq) hsp70-binding protein 1-like isoform X1 (A)	ko04141: Protein processing in endoplasmic reticulum
TraesCS5D02G492200	-1.68615	0.00324264	0.0121284	down	K13475 R protein MLA10 | (RefSeq) disease resistance protein RGA5-like isoform X1 (A)	ko04626: Plant-pathogen interaction
TraesCS5D02G487600	2.99906	0.00116859	0.00510729	up	K14411 RNA-binding protein Musashi | (RefSeq) uncharacterized protein LOC119276992 (A)	ko03015: mRNA surveillance pathway
TraesCS5D02G487000	1.17107	2.65427e-05	0.000188049	up	K00928 aspartate kinase [EC:2.7.2.4] | (RefSeq) aspartokinase 1, chloroplastic-like isoform X1 (A)	ko00260: Glycine, serine and threonine metabolism; ko00261: Monobactam biosynthesis; ko00270: Cysteine and methionine metabolism; ko00300: Lysine biosynthesis; ko01100: Metabolic pathways; ko01110: Biosynthesis of secondary metabolites; ko01210: 2-Oxocarboxylic acid metabolism; ko01230: Biosynthesis of amino acids
TraesCS5D02G484900	7.0617	1.02 × 10-61	1.30 × 10-58	up	K13223 indole-2-monooxygenase [EC:1.14.14.153] | (RefSeq) indole-2-monooxygenase-like (A)	ko00402: Benzoxazinoid biosynthesis; ko01110: Biosynthesis of secondary metabolites
TraesCS5D02G484800	1.32886	6.57056e-05	0.000418903	up	K01595 phosphoenolpyruvate carboxylase [EC:4.1.1.31] | (RefSeq) uncharacterized protein LOC103701209 (A)	ko00620: Pyruvate metabolism; ko00710: Carbon fixation in photosynthetic organisms; ko01100: Metabolic pathways; ko01200: Carbon metabolism
TraesCS5D02G477800	1.49616	0.017024	0.0476486	up	K14674 TAG lipase / steryl ester hydrolase / phospholipase A2 / LPA acyltransferase [EC:3.1.1.3 3.1.1.13 3.1.1.4 2.3.1.51] | (RefSeq) triacylglycerol lipase SDP1-like (A)	ko00100: Steroid biosynthesis; ko00561: Glycerolipid metabolism; ko00564: Glycerophospholipid metabolism; ko00565: Ether lipid metabolism; ko00590: Arachidonic acid metabolism; ko00591: Linoleic acid metabolism; ko00592: alpha-Linolenic acid metabolism; ko01100: Metabolic pathways; ko01110: Biosynthesis of secondary metabolites
TraesCS5D02G471200	1.09388	0.00241864	0.00947233	up	K12876 RNA-binding protein 8A | (RefSeq) RNA-binding protein Y14B-like isoform X1 (A)	ko03013: Nucleocytoplasmic transport; ko03015: mRNA surveillance pathway; ko03040: Spliceosome
TraesCS5D02G465200	-2.38926	1.29411e-07	1.56682e-06	down	K01759 lactoylglutathione lyase [EC:4.4.1.5] | (RefSeq) probable lactoylglutathione lyase, chloroplastic (A)	ko00620: Pyruvate metabolism; ko01100: Metabolic pathways
TraesCS5D02G460700	-1.08303	0.0172934	0.0482613	down	K00472 prolyl 4-hydroxylase [EC:1.14.11.2] | (RefSeq) probable prolyl 4-hydroxylase 6 (A)	ko00330: Arginine and proline metabolism; ko01100: Metabolic pathways
TraesCS5D02G454300	2.3807	4.69537e-13	1.40076e-11	up	K01728 pectate lyase [EC:4.2.2.2] | (RefSeq) probable pectate lyase 3 isoform X1 (A)	ko00040: Pentose and glucuronate interconversions; ko01100: Metabolic pathways
TraesCS5D02G453200	1.43244	6.73715e-07	7.03573e-06	up	K03283 heat shock 70kDa protein 1/2/6/8 | (GenBank) DnaK family protein (A)	ko03040: Spliceosome; ko04141: Protein processing in endoplasmic reticulum; ko04144: Endocytosis
TraesCS5D02G449400	-4.78226	9.70202e-14	3.18968e-12	down	K14484 auxin-responsive protein IAA | (RefSeq) auxin-responsive protein IAA14-like (A)	ko04075: Plant hormone signal transduction
TraesCS5D02G440700	1.66675	9.719e-09	1.4636e-07	up	K00799 glutathione S-transferase [EC:2.5.1.18] | (RefSeq) probable glutathione S-transferase GSTF1 (A)	ko00480: Glutathione metabolism; ko01100: Metabolic pathways
TraesCS5D02G440100	2.44007	6.00682e-05	0.000386184	up	K02734 20S proteasome subunit beta 4 [EC:3.4.25.1] | (RefSeq) uncharacterized protein LOC123117148 (A)	ko03050: Proteasome
TraesCS5D02G439500	2.57435	0.000152253	0.000874477	up	K03231 elongation factor 1-alpha | (RefSeq) uncharacterized protein LOC117852377 isoform X1 (A)	ko03013: Nucleocytoplasmic transport
TraesCS5D02G439400	1.4411	2.83435e-05	0.000199565	up	K00430 peroxidase [EC:1.11.1.7] | (RefSeq) uncharacterized protein LOC109784706 (A)	ko00940: Phenylpropanoid biosynthesis; ko01100: Metabolic pathways; ko01110: Biosynthesis of secondary metabolites
TraesCS5D02G437200	1.36207	0.00158633	0.00661151	up	K00850 6-phosphofructokinase 1 [EC:2.7.1.11] | (RefSeq) ATP-dependent 6-phosphofructokinase 6-like (A)	ko00010: Glycolysis / Gluconeogenesis; ko00030: Pentose phosphate pathway; ko00051: Fructose and mannose metabolism; ko00052: Galactose metabolism; ko01100: Metabolic pathways; ko01110: Biosynthesis of secondary metabolites; ko01200: Carbon metabolism; ko01230: Biosynthesis of amino acids; ko03018: RNA degradation
TraesCS5D02G437000	2.92568	3.60066e-08	4.86607e-07	up	K13435 serine/threonine-protein kinase Pto | (RefSeq) receptor-like protein kinase HERK 1 isoform X2 (A)	ko04626: Plant-pathogen interaction
TraesCS5D02G435500	2.155	0.00445762	0.0158258	up	K13258 2-hydroxyisoflavanone dehydratase [EC:4.2.1.105] | (RefSeq) 2-hydroxyisoflavanone dehydratase-like (A)	ko00943: Isoflavonoid biosynthesis; ko01100: Metabolic pathways; ko01110: Biosynthesis of secondary metabolites
TraesCS5D02G434100	-2.32128	1.62 × 10-37	4.48 × 10-35	down	K09503 DnaJ homolog subfamily A member 2 | (RefSeq) dnaJ protein homolog (A)	ko04141: Protein processing in endoplasmic reticulum
TraesCS5D02G433600	1.66675	0.000867698	0.00397572	up	K02552 menaquinone-specific isochorismate synthase [EC:5.4.4.2] | (RefSeq) isochorismate synthase 2, chloroplastic-like (A)	ko00130: Ubiquinone and other terpenoid-quinone biosynthesis; ko01100: Metabolic pathways; ko01110: Biosynthesis of secondary metabolites; ko01240: Biosynthesis of cofactors
TraesCS5D02G433100	-1.38094	0.00223731	0.00885293	down	K13434 pathogenesis-related genes transcriptional activator PTI6 | (RefSeq) LOW QUALITY PROTEIN: pathogenesis-related genes transcriptional activator PTI6-like (A)	ko04626: Plant-pathogen interaction
TraesCS5D02G432700	-1.12658	4.90156e-06	4.20977e-05	down	K00799 glutathione S-transferase [EC:2.5.1.18] | (RefSeq) probable glutathione S-transferase GSTU1 (A)	ko00480: Glutathione metabolism; ko01100: Metabolic pathways
TraesCS5D02G425700	1.44127	0.00425381	0.0152229	up	K01681 aconitate hydratase [EC:4.2.1.3] | (RefSeq) putative aconitate hydratase, cytoplasmic (A)	ko00020: Citrate cycle (TCA cycle); ko00630: Glyoxylate and dicarboxylate metabolism; ko01100: Metabolic pathways; ko01110: Biosynthesis of secondary metabolites; ko01200: Carbon metabolism; ko01210: 2-Oxocarboxylic acid metabolism; ko01230: Biosynthesis of amino acids
TraesCS5D02G424100	-1.92166	2.71204e-05	0.000191723	down	K07375 tubulin beta | (RefSeq) tubulin beta-4 chain (A)	ko04145: Phagosome
TraesCS5D02G424000	1.10941	3.79756e-08	5.11666e-07	up	K00088 IMP dehydrogenase [EC:1.1.1.205] | (RefSeq) inosine-5'-monophosphate dehydrogenase-like (A)	ko00230: Purine metabolism; ko01100: Metabolic pathways; ko01110: Biosynthesis of secondary metabolites; ko01232: Nucleotide metabolism
TraesCS5D02G423400	-1.02402	0.00107395	0.00475346	down	K03231 elongation factor 1-alpha | (RefSeq) elongation factor 1-alpha-like isoform X1 (A)	ko03013: Nucleocytoplasmic transport
TraesCS5D02G420300	-1.88062	0.00467748	0.0164865	down	K01897 long-chain acyl-CoA synthetase [EC:6.2.1.3] | (RefSeq) long chain acyl-CoA synthetase 2 (A)	ko00061: Fatty acid biosynthesis; ko00071: Fatty acid degradation; ko01100: Metabolic pathways; ko01212: Fatty acid metabolism; ko04146: Peroxisome
TraesCS5D02G419900	1.5862	1.62933e-07	1.93673e-06	up	K09648 mitochondrial inner membrane protease subunit 2 [EC:3.4.21.-] | (RefSeq) mitochondrial inner membrane protease subunit 2-like (A)	ko03060: Protein export
TraesCS5D02G419300	3.39457	8.22457e-06	6.68285e-05	up	K00472 prolyl 4-hydroxylase [EC:1.14.11.2] | (RefSeq) uncharacterized protein LOC120667942 (A)	ko00330: Arginine and proline metabolism; ko01100: Metabolic pathways
TraesCS5D02G418200	-1.34377	0.00115374	0.0050502	down	K01081 5'-nucleotidase [EC:3.1.3.5] | (RefSeq) 5' nucleotidase family protein (A)	ko00230: Purine metabolism; ko00240: Pyrimidine metabolism; ko00760: Nicotinate and nicotinamide metabolism; ko01100: Metabolic pathways; ko01110: Biosynthesis of secondary metabolites; ko01232: Nucleotide metabolism
TraesCS5D02G417700	-3.18127	4.34151e-12	1.12732e-10	down	K07374 tubulin alpha | (RefSeq) tubulin alpha-1 chain-like (A)	ko04145: Phagosome
TraesCS5D02G417200	2.39675	1.14006e-18	6.57839e-17	up	K13415 protein brassinosteroid insensitive 1 [EC:2.7.10.1 2.7.11.1] | (RefSeq) brassinosteroid LRR receptor kinase (A)	ko04075: Plant hormone signal transduction
TraesCS5D02G413700	-1.94474	1.39766e-25	1.51032e-23	down	K12189 ESCRT-II complex subunit VPS25 | (RefSeq) vacuolar protein sorting-associated protein 25-like isoform X3 (A)	ko04144: Endocytosis
TraesCS5D02G413600	-2.45649	4.18933e-05	0.000281871	down	K12189 ESCRT-II complex subunit VPS25 | (RefSeq) vacuolar protein sorting-associated protein 25-like isoform X3 (A)	ko04144: Endocytosis
TraesCS5D02G413200	-2.36632	9.0089e-06	7.24423e-05	down	K01723 hydroperoxide dehydratase [EC:4.2.1.92] | (RefSeq) allene oxide synthase 1, chloroplastic (A)	ko00592: alpha-Linolenic acid metabolism; ko01100: Metabolic pathways; ko01110: Biosynthesis of secondary metabolites
TraesCS5D02G412300	1.44222	2.08157e-07	2.4263e-06	up	K03100 signal peptidase I [EC:3.4.21.89] | (RefSeq) probable thylakoidal processing peptidase 2, chloroplastic (A)	ko03060: Protein export
TraesCS5D02G411000	-3.13056	0.000548707	0.00268138	down	K14400 pre-mRNA cleavage complex 2 protein Pcf11 | (RefSeq) LOW QUALITY PROTEIN: uncharacterized protein LOC109844760 (A)	ko03015: mRNA surveillance pathway
TraesCS5D02G407800	1.47409	5.81509e-10	1.08796e-08	up	K00133 aspartate-semialdehyde dehydrogenase [EC:1.2.1.11] | (RefSeq) uncharacterized protein LOC109743487 (A)	ko00260: Glycine, serine and threonine metabolism; ko00261: Monobactam biosynthesis; ko00270: Cysteine and methionine metabolism; ko00300: Lysine biosynthesis; ko01100: Metabolic pathways; ko01110: Biosynthesis of secondary metabolites; ko01210: 2-Oxocarboxylic acid metabolism; ko01230: Biosynthesis of amino acids
TraesCS5D02G407300	4.24195	5.43838e-17	2.6113e-15	up	K13260 isoflavone/4'-methoxyisoflavone 2'-hydroxylase [EC:1.14.14.90 1.14.14.89] | (RefSeq) cytochrome P450 81Q32-like (A)	ko00943: Isoflavonoid biosynthesis; ko01100: Metabolic pathways; ko01110: Biosynthesis of secondary metabolites
TraesCS5D02G404600	-2.23122	1.986e-11	4.72979e-10	down	K05391 cyclic nucleotide gated channel, plant | (RefSeq) cyclic nucleotide-gated ion channel 2 (A)	ko04626: Plant-pathogen interaction
TraesCS5D02G404400	-2.34163	5.08798e-14	1.7368e-12	down	K12835 ATP-dependent RNA helicase DDX42 [EC:3.6.4.13] | (RefSeq) DEAD-box ATP-dependent RNA helicase 24 isoform X1 (A)	ko03040: Spliceosome
TraesCS5D02G404300	-5.76601	4.94577e-07	5.32185e-06	down	K00012 UDPglucose 6-dehydrogenase [EC:1.1.1.22] | (RefSeq) UDP-glucose 6-dehydrogenase 4-like (A)	ko00040: Pentose and glucuronate interconversions; ko00053: Ascorbate and aldarate metabolism; ko00520: Amino sugar and nucleotide sugar metabolism; ko01100: Metabolic pathways; ko01240: Biosynthesis of cofactors; ko01250: Biosynthesis of nucleotide sugars
TraesCS5D02G404000	2.41567	0.00149275	0.00628568	up	K23452 UDP-glucosyltransferase 85A [EC:2.4.1.-] | (RefSeq) UDP-glycosyltransferase 85A2 (A)	ko00908: Zeatin biosynthesis; ko01110: Biosynthesis of secondary metabolites
TraesCS5D02G403700	2.74621	7.03452e-09	1.09129e-07	up	K23452 UDP-glucosyltransferase 85A [EC:2.4.1.-] | (RefSeq) UDP-glycosyltransferase 85A2 (A)	ko00908: Zeatin biosynthesis; ko01110: Biosynthesis of secondary metabolites
TraesCS5D02G403600	2.48108	2.42966e-16	1.09121e-14	up	K23452 UDP-glucosyltransferase 85A [EC:2.4.1.-] | (RefSeq) hypothetical protein (A)	ko00908: Zeatin biosynthesis; ko01110: Biosynthesis of secondary metabolites
TraesCS5D02G402200	1.48133	3.22416e-06	2.87722e-05	up	K14406 cleavage stimulation factor subunit 1 | (RefSeq) cleavage stimulation factor subunit 50 (A)	ko03015: mRNA surveillance pathway
TraesCS5D02G401000	-1.08838	6.53811e-06	5.45792e-05	down	K12121 phytochrome B | (RefSeq) phytochrome 1-like isoform X1 (A)	ko04712: Circadian rhythm - plant
TraesCS5D02G399100	-2.36971	9.42676e-05	0.000574564	down	K01188 beta-glucosidase [EC:3.2.1.21] | (RefSeq) uncharacterized protein LOC109734276 (A)	ko00460: Cyanoamino acid metabolism; ko00500: Starch and sucrose metabolism; ko00999: Biosynthesis of various plant secondary metabolites; ko01100: Metabolic pathways; ko01110: Biosynthesis of secondary metabolites
TraesCS5D02G399000	5.58146	4.53 × 10-76	1.42 × 10-72	up	K01188 beta-glucosidase [EC:3.2.1.21] | (RefSeq) beta-glucosidase BoGH3B-like isoform X1 (A)	ko00460: Cyanoamino acid metabolism; ko00500: Starch and sucrose metabolism; ko00999: Biosynthesis of various plant secondary metabolites; ko01100: Metabolic pathways; ko01110: Biosynthesis of secondary metabolites
TraesCS5D02G397600	-1.07286	0.00101349	0.00452743	down	K14442 ATP-dependent RNA helicase DHX36 [EC:3.6.4.13] | (RefSeq) DExH-box ATP-dependent RNA helicase DExH3 (A)	ko03018: RNA degradation
TraesCS5D02G392600	1.07706	0.0130733	0.0384163	up	K02875 large subunit ribosomal protein L14e | (RefSeq) uncharacterized protein LOC105033615 (A)	ko03010: Ribosome
TraesCS5D02G390800	-2.30585	5.0407e-11	1.12626e-09	down	K13425 WRKY transcription factor 22 | (RefSeq) WRKY transcription factor 22-like (A)	ko04016: MAPK signaling pathway - plant; ko04626: Plant-pathogen interaction
TraesCS5D02G388200	-2.37442	0.00532225	0.0183409	down	K14484 auxin-responsive protein IAA | (RefSeq) auxin-responsive protein IAA12-like (A)	ko04075: Plant hormone signal transduction
TraesCS5D02G386800	1.09815	0.000934641	0.00422889	up	K01968 3-methylcrotonyl-CoA carboxylase alpha subunit [EC:6.4.1.4] | (RefSeq) methylcrotonoyl-CoA carboxylase subunit alpha, mitochondrial (A)	ko00280: Valine, leucine and isoleucine degradation; ko01100: Metabolic pathways
TraesCS5D02G379500	1.98917	2.55194e-14	9.08206e-13	up	K14570 RNA exonuclease [EC:3.1.-.-] | (RefSeq) predicted protein (A)	ko03008: Ribosome biogenesis in eukaryotes
TraesCS5D02G374100	3.56456	1.93144e-05	0.000142402	up	K19891 glucan endo-1,3-beta-glucosidase 1/2/3 [EC:3.2.1.39] | (RefSeq) hypothetical protein (A)	ko00500: Starch and sucrose metabolism; ko01100: Metabolic pathways
TraesCS5D02G365300	1.10276	0.000262995	0.00141284	up	K12183 ESCRT-I complex subunit TSG101 | (RefSeq) protein ELC-like (A)	ko03250: Viral life cycle - HIV-1; ko04144: Endocytosis
TraesCS5D02G365100	2.11943	0.000373308	0.00192224	up	K02291 15-cis-phytoene synthase [EC:2.5.1.32] | (RefSeq) phytoene synthase 2, chloroplastic-like (A)	ko00906: Carotenoid biosynthesis; ko01100: Metabolic pathways; ko01110: Biosynthesis of secondary metabolites
TraesCS5D02G364600	-1.65069	0.0131112	0.0385087	down	K00430 peroxidase [EC:1.11.1.7] | (RefSeq) peroxidase 2-like (A)	ko00940: Phenylpropanoid biosynthesis; ko01100: Metabolic pathways; ko01110: Biosynthesis of secondary metabolites
TraesCS5D02G361000	-1.32257	0.00050351	0.00248939	down	K00963 UTP--glucose-1-phosphate uridylyltransferase [EC:2.7.7.9] | (RefSeq) UTP--glucose-1-phosphate uridylyltransferase (A)	ko00040: Pentose and glucuronate interconversions; ko00052: Galactose metabolism; ko00500: Starch and sucrose metabolism; ko00520: Amino sugar and nucleotide sugar metabolism; ko01100: Metabolic pathways; ko01110: Biosynthesis of secondary metabolites; ko01240: Biosynthesis of cofactors; ko01250: Biosynthesis of nucleotide sugars
TraesCS5D02G354600	-1.10764	0.00393281	0.0142737	down	K00485 dimethylaniline monooxygenase (N-oxide forming) / hypotaurine monooxygenase [EC:1.14.13.8 1.8.1.-] | (RefSeq) probable flavin-containing monooxygenase 1 (A)	ko00430: Taurine and hypotaurine metabolism; ko01100: Metabolic pathways
TraesCS5D02G353300	-1.64247	0.00060029	0.00289614	down	K19476 vacuolar protein sorting-associated protein IST1 | (RefSeq) vacuolar protein sorting-associated protein IST1-like (A)	ko04144: Endocytosis
TraesCS5D02G343400	3.52119	0.000230685	0.0012604	up	K00889 1-phosphatidylinositol-4-phosphate 5-kinase [EC:2.7.1.68] | (RefSeq) phosphatidylinositol 4-phosphate 5-kinase 6-like (A)	ko00562: Inositol phosphate metabolism; ko01100: Metabolic pathways; ko04070: Phosphatidylinositol signaling system; ko04144: Endocytosis
TraesCS5D02G343100	2.89698	3.64385e-05	0.000249213	up	K00799 glutathione S-transferase [EC:2.5.1.18] | (RefSeq) glutathione transferase16 (A)	ko00480: Glutathione metabolism; ko01100: Metabolic pathways
TraesCS5D02G334100	-1.01673	0.000969243	0.00436478	down	K00276 primary-amine oxidase [EC:1.4.3.21] | (RefSeq) hypothetical protein (A)	ko00260: Glycine, serine and threonine metabolism; ko00350: Tyrosine metabolism; ko00360: Phenylalanine metabolism; ko00410: beta-Alanine metabolism; ko00950: Isoquinoline alkaloid biosynthesis; ko00960: Tropane, piperidine and pyridine alkaloid biosynthesis; ko01100: Metabolic pathways; ko01110: Biosynthesis of secondary metabolites
TraesCS5D02G332200	2.222	3.1243e-14	1.09228e-12	up	K01373 cathepsin F [EC:3.4.22.41] | (RefSeq) cysteine proteinase 1 (A)	ko04626: Plant-pathogen interaction
TraesCS5D02G331100	-1.6087	8.7323e-09	1.32734e-07	down	K01803 triosephosphate isomerase (TIM) [EC:5.3.1.1] | (RefSeq) triosephosphate isomerase, chloroplastic-like (A)	ko00010: Glycolysis / Gluconeogenesis; ko00051: Fructose and mannose metabolism; ko00562: Inositol phosphate metabolism; ko00710: Carbon fixation in photosynthetic organisms; ko01100: Metabolic pathways; ko01110: Biosynthesis of secondary metabolites; ko01200: Carbon metabolism; ko01230: Biosynthesis of amino acids
TraesCS5D02G325500	-3.74219	1.18959e-13	3.84626e-12	down	K01183 chitinase [EC:3.2.1.14] | (RefSeq) xylanase inhibitor protein 1-like (A)	ko00520: Amino sugar and nucleotide sugar metabolism; ko01100: Metabolic pathways
TraesCS5D02G323400	-1.24274	3.54907e-08	4.80851e-07	down	K01179 endoglucanase [EC:3.2.1.4] | (RefSeq) endoglucanase 23-like (A)	ko00500: Starch and sucrose metabolism; ko01100: Metabolic pathways
TraesCS5D02G315400	-3.31628	6.19189e-08	7.97699e-07	down	K20557 transcription factor VIP1 | (RefSeq) hypothetical protein (A)	ko04016: MAPK signaling pathway - plant
TraesCS5D02G312400	-1.46437	9.72731e-07	9.82095e-06	down	K01765 inositol-1,3,4-trisphosphate 5/6-kinase [EC:2.7.1.159] | (RefSeq) inositol-tetrakisphosphate 1-kinase 6 (A)	ko00562: Inositol phosphate metabolism; ko01100: Metabolic pathways
TraesCS5D02G312300	-1.13416	0.00569707	0.0194137	down	K01765 inositol-1,3,4-trisphosphate 5/6-kinase [EC:2.7.1.159] | (RefSeq) inositol-tetrakisphosphate 1-kinase 6 (A)	ko00562: Inositol phosphate metabolism; ko01100: Metabolic pathways
TraesCS5D02G309600	1.27483	0.000163719	0.000932125	up	K01069 hydroxyacylglutathione hydrolase [EC:3.1.2.6] | (RefSeq) probable hydroxyacylglutathione hydrolase 2, chloroplastic (A)	ko00620: Pyruvate metabolism; ko01100: Metabolic pathways
TraesCS5D02G307800	2.09643	4.06841e-08	5.43776e-07	up	K09648 mitochondrial inner membrane protease subunit 2 [EC:3.4.21.-] | (RefSeq) mitochondrial inner membrane protease subunit 2-like (A)	ko03060: Protein export
TraesCS5D02G307300	-1.55944	0.008181	0.0262163	down	K02987 small subunit ribosomal protein S4e | (RefSeq) 40S ribosomal protein S4-C (A)	ko03010: Ribosome
TraesCS5D02G305700	1.62777	3.22599e-09	5.32588e-08	up	K05955 protein farnesyltransferase/geranylgeranyltransferase type-1 subunit alpha [EC:2.5.1.58 2.5.1.59] | (RefSeq) protein farnesyltransferase/geranylgeranyltransferase type-1 subunit alpha-like (A)	ko00900: Terpenoid backbone biosynthesis; ko01110: Biosynthesis of secondary metabolites
TraesCS5D02G304700	-1.44729	0.000864967	0.00396566	down	K13436 pto-interacting protein 1 [EC:2.7.11.1] | (RefSeq) PTI1-like tyrosine-protein kinase 3 (A)	ko04626: Plant-pathogen interaction
TraesCS5D02G303000	-1.66483	1.06471e-08	1.58771e-07	down	K01188 beta-glucosidase [EC:3.2.1.21] | (RefSeq) beta-glucosidase 32-like (A)	ko00460: Cyanoamino acid metabolism; ko00500: Starch and sucrose metabolism; ko00999: Biosynthesis of various plant secondary metabolites; ko01100: Metabolic pathways; ko01110: Biosynthesis of secondary metabolites
TraesCS5D02G302900	-1.67346	0.00195933	0.00790499	down	K01188 beta-glucosidase [EC:3.2.1.21] | (RefSeq) beta-glucosidase 31-like isoform X1 (A)	ko00460: Cyanoamino acid metabolism; ko00500: Starch and sucrose metabolism; ko00999: Biosynthesis of various plant secondary metabolites; ko01100: Metabolic pathways; ko01110: Biosynthesis of secondary metabolites
TraesCS5D02G302800	-1.4316	1.18219e-05	9.22608e-05	down	K01188 beta-glucosidase [EC:3.2.1.21] | (RefSeq) beta-glucosidase 31-like (A)	ko00460: Cyanoamino acid metabolism; ko00500: Starch and sucrose metabolism; ko00999: Biosynthesis of various plant secondary metabolites; ko01100: Metabolic pathways; ko01110: Biosynthesis of secondary metabolites
TraesCS5D02G302600	1.47284	0.000110662	0.000660561	up	K01188 beta-glucosidase [EC:3.2.1.21] | (RefSeq) beta-glucosidase 31-like (A)	ko00460: Cyanoamino acid metabolism; ko00500: Starch and sucrose metabolism; ko00999: Biosynthesis of various plant secondary metabolites; ko01100: Metabolic pathways; ko01110: Biosynthesis of secondary metabolites
TraesCS5D02G300900	1.25929	0.000563812	0.00274641	up	K15542 polyadenylation factor subunit 2 | (RefSeq) flowering time control protein FY (A)	ko03015: mRNA surveillance pathway
TraesCS5D02G298700	-3.65375	1.87704e-08	2.67171e-07	down	K12448 UDP-arabinose 4-epimerase [EC:5.1.3.5] | (RefSeq) probable UDP-arabinose 4-epimerase 1 (A)	ko00520: Amino sugar and nucleotide sugar metabolism; ko01100: Metabolic pathways; ko01250: Biosynthesis of nucleotide sugars
TraesCS5D02G287700	-1.70762	2.83638e-10	5.59432e-09	down	K00224 chloroplastic oxoene reductase [EC:1.3.1.-] | (RefSeq) chloroplast envelope quinone oxidoreductase homolog (A)	ko00592: alpha-Linolenic acid metabolism; ko01110: Biosynthesis of secondary metabolites
TraesCS5D02G286400	-1.13271	0.00148565	0.00626123	down	K02912 large subunit ribosomal protein L32e | (RefSeq) 60S ribosomal protein L32-1-like (A)	ko03010: Ribosome
TraesCS5D02G283600	-1.121	0.00623528	0.0209593	down	K00306 sarcosine oxidase / L-pipecolate oxidase [EC:1.5.3.1 1.5.3.7] | (RefSeq) probable sarcosine oxidase (A)	ko00260: Glycine, serine and threonine metabolism; ko00310: Lysine degradation; ko01100: Metabolic pathways; ko04146: Peroxisome
TraesCS5D02G280400	-1.67656	1.1825e-07	1.44016e-06	down	K20547 basic endochitinase B [EC:3.2.1.14] | (RefSeq) chitinase 1 (A)	ko00520: Amino sugar and nucleotide sugar metabolism; ko01100: Metabolic pathways; ko04016: MAPK signaling pathway - plant
TraesCS5D02G277500	-1.19456	1.60548e-05	0.000120801	down	K00021 hydroxymethylglutaryl-CoA reductase (NADPH) [EC:1.1.1.34] | (RefSeq) 3-hydroxy-3-methylglutaryl-coenzyme A reductase 3-like (A)	ko00900: Terpenoid backbone biosynthesis; ko01100: Metabolic pathways; ko01110: Biosynthesis of secondary metabolites
TraesCS5D02G276600	1.30966	1.9612e-05	0.000144417	up	K09753 cinnamoyl-CoA reductase [EC:1.2.1.44] | (RefSeq) cinnamoyl-CoA reductase 1-like (A)	ko00940: Phenylpropanoid biosynthesis; ko01100: Metabolic pathways; ko01110: Biosynthesis of secondary metabolites
TraesCS5D02G273300	-3.20451	9.95021e-29	1.39329e-26	down	K01613 phosphatidylserine decarboxylase [EC:4.1.1.65] | (RefSeq) phosphatidylserine decarboxylase proenzyme 3-like (A)	ko00564: Glycerophospholipid metabolism; ko01100: Metabolic pathways; ko01110: Biosynthesis of secondary metabolites
TraesCS5D02G268000	-1.35064	3.53687e-05	0.000242641	down	K04079 molecular chaperone HtpG | (RefSeq) heat shock protein 81-3 (A)	ko04141: Protein processing in endoplasmic reticulum; ko04626: Plant-pathogen interaction
TraesCS5D02G266300	1.57111	3.20669e-05	0.00022253	up	K18835 WRKY transcription factor 2 | (RefSeq) probable WRKY transcription factor 2 (A)	ko04626: Plant-pathogen interaction
TraesCS5D02G266000	-5.25885	5.22 × 10-44	2.50 × 10-41	down	K13993 HSP20 family protein | (RefSeq) small heat shock protein, chloroplastic-like (A)	ko04141: Protein processing in endoplasmic reticulum
TraesCS5D02G254000	1.29801	2.2466e-12	6.11555e-11	up	K00799 glutathione S-transferase [EC:2.5.1.18] | (RefSeq) glutathione transferase GST 23 (A)	ko00480: Glutathione metabolism; ko01100: Metabolic pathways
TraesCS5D02G249000	-2.29881	0.000264866	0.00142046	down	K13258 2-hydroxyisoflavanone dehydratase [EC:4.2.1.105] | (RefSeq) uncharacterized protein LOC115994703 (A)	ko00943: Isoflavonoid biosynthesis; ko01100: Metabolic pathways; ko01110: Biosynthesis of secondary metabolites
TraesCS5D02G248700	-2.36886	6.86468e-05	0.00043501	down	K17872 demethylphylloquinone reductase [EC:1.6.5.12] | (RefSeq) alternative NAD(P)H-ubiquinone oxidoreductase C1, chloroplastic/mitochondrial-like isoform X1 (A)	ko00130: Ubiquinone and other terpenoid-quinone biosynthesis; ko01100: Metabolic pathways; ko01110: Biosynthesis of secondary metabolites; ko01240: Biosynthesis of cofactors
TraesCS5D02G247700	3.33505	2.52488e-06	2.31379e-05	up	K13258 2-hydroxyisoflavanone dehydratase [EC:4.2.1.105] | (RefSeq) uncharacterized protein LOC115994703 (A)	ko00943: Isoflavonoid biosynthesis; ko01100: Metabolic pathways; ko01110: Biosynthesis of secondary metabolites
TraesCS5D02G245600	-3.02315	0.00197838	0.00797105	down	K16224 senescence-induced receptor-like serine/threonine-protein kinase | (RefSeq) FRK1; FLG22-induced receptor-like kinase 1 (A)	ko04016: MAPK signaling pathway - plant; ko04626: Plant-pathogen interaction
TraesCS5D02G244200	1.30134	3.81414e-08	5.13641e-07	up	K13258 2-hydroxyisoflavanone dehydratase [EC:4.2.1.105] | (RefSeq) uncharacterized protein LOC115994703 (A)	ko00943: Isoflavonoid biosynthesis; ko01100: Metabolic pathways; ko01110: Biosynthesis of secondary metabolites
TraesCS5D02G235400	-1.65284	4.02444e-25	4.17184e-23	down	K01938 formate--tetrahydrofolate ligase [EC:6.3.4.3] | (RefSeq) formate--tetrahydrofolate ligase (A)	ko00670: One carbon pool by folate; ko01100: Metabolic pathways; ko01200: Carbon metabolism; ko01240: Biosynthesis of cofactors
TraesCS5D02G232400	-1.78548	0.015508	0.0441707	down	K09753 cinnamoyl-CoA reductase [EC:1.2.1.44] | (RefSeq) cinnamoyl-CoA reductase 1-like (A)	ko00940: Phenylpropanoid biosynthesis; ko01100: Metabolic pathways; ko01110: Biosynthesis of secondary metabolites
TraesCS5D02G228300	1.66983	0.00207167	0.00829008	up	K15404 aldehyde decarbonylase [EC:4.1.99.5] | (RefSeq) protein ECERIFERUM 3-like (A)	ko00073: Cutin, suberine and wax biosynthesis; ko01110: Biosynthesis of secondary metabolites
TraesCS5D02G225200	-2.37521	1.52828e-07	1.82522e-06	down	K11816 indole-3-pyruvate monooxygenase [EC:1.14.13.168] | (RefSeq) probable indole-3-pyruvate monooxygenase YUCCA11 (A)	ko00380: Tryptophan metabolism; ko01100: Metabolic pathways
TraesCS5D02G222600	-5.43906	3.20419e-08	4.39017e-07	down	K07441 beta-1,4-N-acetylglucosaminyltransferase [EC:2.4.1.141] | (RefSeq) UDP-N-acetylglucosamine transferase subunit ALG14 homolog (A)	ko00510: N-Glycan biosynthesis; ko00513: Various types of N-glycan biosynthesis; ko01100: Metabolic pathways
TraesCS5D02G222100	-1.27242	3.83496e-05	0.000260816	down	K13447 respiratory burst oxidase [EC:1.6.3.- 1.11.1.-] | (RefSeq) respiratory burst oxidase homolog protein E-like (A)	ko04016: MAPK signaling pathway - plant; ko04626: Plant-pathogen interaction
TraesCS5D02G218100	-1.63487	4.57888e-06	3.96061e-05	down	K00083 cinnamyl-alcohol dehydrogenase [EC:1.1.1.195] | (RefSeq) ELI3-1; cinnamyl alcohol dehydrogenase 7 (A)	ko00940: Phenylpropanoid biosynthesis; ko01100: Metabolic pathways; ko01110: Biosynthesis of secondary metabolites
TraesCS5D02G217100	4.07463	2.13673e-07	2.48681e-06	up	K01206 alpha-L-fucosidase [EC:3.2.1.51] | (RefSeq) hypothetical protein (A)	ko00511: Other glycan degradation
TraesCS5D02G210600	-4.47217	4.1443e-16	1.8111e-14	down	K00083 cinnamyl-alcohol dehydrogenase [EC:1.1.1.195] | (RefSeq) ELI3-1; cinnamyl alcohol dehydrogenase 7 (A)	ko00940: Phenylpropanoid biosynthesis; ko01100: Metabolic pathways; ko01110: Biosynthesis of secondary metabolites
TraesCS5D02G210000	-1.03668	0.000784084	0.00365082	down	K16055 trehalose 6-phosphate synthase/phosphatase [EC:2.4.1.15 3.1.3.12] | (RefSeq) alpha,alpha-trehalose-phosphate synthase [UDP-forming] 6-like (A)	ko00500: Starch and sucrose metabolism; ko01100: Metabolic pathways; ko01110: Biosynthesis of secondary metabolites
TraesCS5D02G206500	-2.53039	0.000674136	0.00319875	down	K20606 mitogen-activated protein kinase kinase kinase ANP1 [EC:2.7.11.25] | (RefSeq) mitogen-activated protein kinase kinase kinase NPK1-like (A)	ko04016: MAPK signaling pathway - plant
TraesCS5D02G205300	1.11097	9.03623e-07	9.17691e-06	up	K01895 acetyl-CoA synthetase [EC:6.2.1.1] | (RefSeq) acs2; acetyl-coa synthetase (A)	ko00010: Glycolysis / Gluconeogenesis; ko00620: Pyruvate metabolism; ko00630: Glyoxylate and dicarboxylate metabolism; ko00640: Propanoate metabolism; ko01100: Metabolic pathways; ko01110: Biosynthesis of secondary metabolites; ko01200: Carbon metabolism
TraesCS5D02G204700	-1.12733	0.014843	0.0426282	down	K10260 F-box and WD-40 domain protein 7 | (RefSeq) WD40 repeat-like protein (A)	ko04120: Ubiquitin mediated proteolysis
TraesCS5D02G202600	-1.20233	0.000109273	0.000653656	down	K18655 ATP-dependent RNA helicase DDX19/DBP5 [EC:3.6.4.13] | (RefSeq) DEAD-box ATP-dependent RNA helicase 38-like (A)	ko03013: Nucleocytoplasmic transport; ko03015: mRNA surveillance pathway
TraesCS5D02G201100	-1.22312	6.3899e-11	1.39566e-09	down	K00235 succinate dehydrogenase (ubiquinone) iron-sulfur subunit [EC:1.3.5.1] | (RefSeq) succinate dehydrogenase [ubiquinone] iron-sulfur subunit 2, mitochondrial-like (A)	ko00020: Citrate cycle (TCA cycle); ko00190: Oxidative phosphorylation; ko01100: Metabolic pathways; ko01110: Biosynthesis of secondary metabolites; ko01200: Carbon metabolism
TraesCS5D02G200800	-1.82641	1.85783e-07	2.18985e-06	down	K01087 trehalose 6-phosphate phosphatase [EC:3.1.3.12] | (RefSeq) probable trehalose-phosphate phosphatase 7 (A)	ko00500: Starch and sucrose metabolism; ko01100: Metabolic pathways; ko01110: Biosynthesis of secondary metabolites
TraesCS5D02G200700	-4.07711	8.36615e-24	7.7827e-22	down	K19366 spartin | (RefSeq) senescence/dehydration-associated protein At4g35985, chloroplastic-like (A)	ko04144: Endocytosis
TraesCS5D02G199800	1.40764	4.86351e-05	0.000321529	up	K03635 molybdopterin synthase catalytic subunit [EC:2.8.1.12] | (RefSeq) molybdopterin synthase catalytic subunit (A)	ko00790: Folate biosynthesis; ko01100: Metabolic pathways; ko01240: Biosynthesis of cofactors; ko04122: Sulfur relay system
TraesCS5D02G199000	1.06574	0.00922494	0.0288799	up	K14486 auxin response factor | (RefSeq) auxin response factor 19-like (A)	ko04075: Plant hormone signal transduction
TraesCS5D02G191800	2.38033	0.00257181	0.00996567	up	K13416 brassinosteroid insensitive 1-associated receptor kinase 1 [EC:2.7.10.1 2.7.11.1] | (RefSeq) BRASSINOSTEROID INSENSITIVE 1-associated receptor kinase 1-like isoform X1 (A)	ko04016: MAPK signaling pathway - plant; ko04075: Plant hormone signal transduction; ko04626: Plant-pathogen interaction
TraesCS5D02G190700	1.28074	0.00142826	0.00605563	up	K13459 disease resistance protein RPS2 | (RefSeq) disease resistance protein At4g27190 (A)	ko04626: Plant-pathogen interaction
TraesCS5D02G190600	1.7765	4.58425e-05	0.000305255	up	K08711 ATP-binding cassette, subfamily G (WHITE), member 2, PDR | (RefSeq) ZEB2-regulated ABC transporter 1-like (A)	ko02010: ABC transporters
TraesCS5D02G190000	-3.1992	2.01634e-10	4.08383e-09	down	K13415 protein brassinosteroid insensitive 1 [EC:2.7.10.1 2.7.11.1] | (RefSeq) hypothetical protein (A)	ko04075: Plant hormone signal transduction
TraesCS5D02G188600	-4.02176	3.94 × 10-51	2.74 × 10-48	down	K14497 protein phosphatase 2C [EC:3.1.3.16] | (RefSeq) probable protein phosphatase 2C 68 (A)	ko04016: MAPK signaling pathway - plant; ko04075: Plant hormone signal transduction
TraesCS5D02G188200	1.14371	0.00182983	0.00746872	up	K01784 UDP-glucose 4-epimerase [EC:5.1.3.2] | (RefSeq) UDP-glucose 4-epimerase 4-like (A)	ko00052: Galactose metabolism; ko00520: Amino sugar and nucleotide sugar metabolism; ko01100: Metabolic pathways; ko01250: Biosynthesis of nucleotide sugars
TraesCS5D02G183100	1.02263	1.19283e-06	1.18091e-05	up	K00975 glucose-1-phosphate adenylyltransferase [EC:2.7.7.27] | (RefSeq) putative two-component response regulator ARR21 (A)	ko00500: Starch and sucrose metabolism; ko00520: Amino sugar and nucleotide sugar metabolism; ko01100: Metabolic pathways; ko01110: Biosynthesis of secondary metabolites; ko01250: Biosynthesis of nucleotide sugars
TraesCS5D02G183000	1.03911	2.14837e-05	0.000156285	up	K00975 glucose-1-phosphate adenylyltransferase [EC:2.7.7.27] | (RefSeq) putative two-component response regulator ARR21 (A)	ko00500: Starch and sucrose metabolism; ko00520: Amino sugar and nucleotide sugar metabolism; ko01100: Metabolic pathways; ko01110: Biosynthesis of secondary metabolites; ko01250: Biosynthesis of nucleotide sugars
TraesCS5D02G182600	-1.15704	0.000253578	0.00136967	down	K00975 glucose-1-phosphate adenylyltransferase [EC:2.7.7.27] | (RefSeq) glucose-1-phosphate adenylyltransferase small subunit, chloroplastic/amyloplastic-like (A)	ko00500: Starch and sucrose metabolism; ko00520: Amino sugar and nucleotide sugar metabolism; ko01100: Metabolic pathways; ko01110: Biosynthesis of secondary metabolites; ko01250: Biosynthesis of nucleotide sugars
TraesCS5D02G182200	1.75825	1.11975e-05	8.79266e-05	up	K03094 S-phase kinase-associated protein 1 | (RefSeq) uncharacterized protein LOC123043970 (A)	ko04120: Ubiquitin mediated proteolysis; ko04141: Protein processing in endoplasmic reticulum
TraesCS5D02G182000	2.48233	2.83309e-06	2.56546e-05	up	K14172 light-harvesting complex II chlorophyll a/b binding protein 7 | (RefSeq) chlorophyll a-b binding protein of LHCII type 1 isoform X1 (A)	ko00196: Photosynthesis - antenna proteins; ko01100: Metabolic pathways
TraesCS5D02G181600	-1.02	0.000212824	0.0011736	down	K12524 bifunctional aspartokinase / homoserine dehydrogenase 1 [EC:2.7.2.4 1.1.1.3] | (RefSeq) bifunctional aspartokinase/homoserine dehydrogenase 2, chloroplastic isoform X1 (A)	ko00260: Glycine, serine and threonine metabolism; ko00261: Monobactam biosynthesis; ko00270: Cysteine and methionine metabolism; ko00300: Lysine biosynthesis; ko01100: Metabolic pathways; ko01110: Biosynthesis of secondary metabolites; ko01230: Biosynthesis of amino acids
TraesCS5D02G177200	-3.05513	2.537e-07	2.90836e-06	down	K00208 enoyl-[acyl-carrier protein] reductase I [EC:1.3.1.9 1.3.1.10] | (RefSeq) enoyl-[acyl-carrier-protein] reductase [NADH] 2, chloroplastic-like (A)	ko00061: Fatty acid biosynthesis; ko00780: Biotin metabolism; ko01100: Metabolic pathways; ko01110: Biosynthesis of secondary metabolites; ko01212: Fatty acid metabolism; ko01240: Biosynthesis of cofactors
TraesCS5D02G176700	1.73945	3.87029e-06	3.39269e-05	up	K19893 glucan endo-1,3-beta-glucosidase 5/6 [EC:3.2.1.39] | (RefSeq) glucan endo-1,3-beta-glucosidase 6-like (A)	ko00500: Starch and sucrose metabolism; ko01100: Metabolic pathways
TraesCS5D02G176600	2.2918	7.94962e-08	1.00384e-06	up	K13457 disease resistance protein RPM1 | (RefSeq) disease resistance protein RPM1-like (A)	ko04626: Plant-pathogen interaction
TraesCS5D02G172500	1.04557	4.44309e-05	0.000296779	up	K12843 U4/U6 small nuclear ribonucleoprotein PRP3 | (RefSeq) protein RDM16-like isoform X1 (A)	ko03040: Spliceosome
TraesCS5D02G166400	-4.31655	1.259e-14	4.65405e-13	down	K13416 brassinosteroid insensitive 1-associated receptor kinase 1 [EC:2.7.10.1 2.7.11.1] | (RefSeq) BRASSINOSTEROID INSENSITIVE 1-associated receptor kinase 1-like isoform X1 (A)	ko04016: MAPK signaling pathway - plant; ko04075: Plant hormone signal transduction; ko04626: Plant-pathogen interaction
TraesCS5D02G163700	1.38236	0.00207384	0.00829753	up	K08711 ATP-binding cassette, subfamily G (WHITE), member 2, PDR | (RefSeq) ZEB2-regulated ABC transporter 1-like (A)	ko02010: ABC transporters
TraesCS5D02G159900	1.60313	0.00457113	0.0161617	up	K12829 splicing factor 3B subunit 2 | (RefSeq) splicing factor 3B subunit 2-like (A)	ko03040: Spliceosome
TraesCS5D02G159100	-1.94586	3.90359e-05	0.000264945	down	K01953 asparagine synthase (glutamine-hydrolysing) [EC:6.3.5.4] | (RefSeq) asparagine synthetase [glutamine-hydrolyzing] (A)	ko00250: Alanine, aspartate and glutamate metabolism; ko01100: Metabolic pathways; ko01110: Biosynthesis of secondary metabolites; ko01230: Biosynthesis of amino acids
TraesCS5D02G154500	1.74361	0.000525881	0.00258454	up	K13065 shikimate O-hydroxycinnamoyltransferase [EC:2.3.1.133] | (RefSeq) tryptamine hydroxycinnamoyltransferase 1-like (A)	ko00940: Phenylpropanoid biosynthesis; ko00941: Flavonoid biosynthesis; ko00945: Stilbenoid, diarylheptanoid and gingerol biosynthesis; ko01100: Metabolic pathways; ko01110: Biosynthesis of secondary metabolites
TraesCS5D02G147900	1.0752	0.000438073	0.00220604	up	K01489 cytidine deaminase [EC:3.5.4.5] | (RefSeq) cytidine deaminase 1-like (A)	ko00240: Pyrimidine metabolism; ko01100: Metabolic pathways; ko01232: Nucleotide metabolism
TraesCS5D02G147300	-1.33231	0.0171849	0.0480087	down	K01522 bis(5'-adenosyl)-triphosphatase [EC:3.6.1.29] | (RefSeq) bifunctional bis(5'-adenosyl)-triphosphatase/adenylylsulfatase FHIT-like (A)	ko00230: Purine metabolism; ko01100: Metabolic pathways
TraesCS5D02G146300	2.77919	0.000268695	0.00143725	up	K22450 aralkylamine N-acetyltransferase [EC:2.3.1.87] | (RefSeq) acetyltransferase NSI (A)	ko00380: Tryptophan metabolism; ko01100: Metabolic pathways; ko01110: Biosynthesis of secondary metabolites
TraesCS5D02G145500	1.50131	8.49622e-14	2.80706e-12	up	K01859 chalcone isomerase [EC:5.5.1.6] | (RefSeq) vacuolar-sorting receptor 1 (A)	ko00941: Flavonoid biosynthesis; ko01100: Metabolic pathways; ko01110: Biosynthesis of secondary metabolites
TraesCS5D02G145400	1.78108	0.00378404	0.0138191	up	K01859 chalcone isomerase [EC:5.5.1.6] | (RefSeq) chalcone isomerase-like protein 2 (A)	ko00941: Flavonoid biosynthesis; ko01100: Metabolic pathways; ko01110: Biosynthesis of secondary metabolites
TraesCS5D02G144000	-1.50038	0.00866281	0.0274429	down	K03094 S-phase kinase-associated protein 1 | (RefSeq) uncharacterized protein LOC123185016 (A)	ko04120: Ubiquitin mediated proteolysis; ko04141: Protein processing in endoplasmic reticulum
TraesCS5D02G143600	1.19799	0.00147611	0.00622787	up	K07204 regulatory associated protein of mTOR | (RefSeq) regulatory-associated protein of TOR 1-like isoform X1 (A)	ko04136: Autophagy - other
TraesCS5D02G141900	2.50051	7.00239e-14	2.34245e-12	up	K13448 calcium-binding protein CML | (RefSeq) probable calcium-binding protein CML36 (A)	ko04626: Plant-pathogen interaction
TraesCS5D02G139900	1.12408	7.26021e-07	7.52176e-06	up	K09588 3beta,22alpha-dihydroxysteroid 3-dehydrogenase [EC:1.14.19.79] | (RefSeq) cytochrome P450 90A1 (A)	ko00905: Brassinosteroid biosynthesis; ko01100: Metabolic pathways; ko01110: Biosynthesis of secondary metabolites
TraesCS5D02G139500	3.6923	1.71845e-17	8.60675e-16	up	K14494 DELLA protein | (RefSeq) DELLA protein GAIP (A)	ko04075: Plant hormone signal transduction
TraesCS5D02G139300	-1.97582	5.37201e-30	8.16332e-28	down	K01953 asparagine synthase (glutamine-hydrolysing) [EC:6.3.5.4] | (RefSeq) asparagine synthetase [glutamine-hydrolyzing] 2-like (A)	ko00250: Alanine, aspartate and glutamate metabolism; ko01100: Metabolic pathways; ko01110: Biosynthesis of secondary metabolites; ko01230: Biosynthesis of amino acids
TraesCS5D02G138100	1.87418	0.00265688	0.0102434	up	K18081 myotubularin-related protein 1/2 [EC:3.1.3.64 3.1.3.95] | (RefSeq) phosphatidylinositol-3-phosphatase myotubularin-2-like (A)	ko00562: Inositol phosphate metabolism; ko01100: Metabolic pathways; ko04070: Phosphatidylinositol signaling system
TraesCS5D02G131700	-1.37905	8.60253e-05	0.000530799	down	K03857 phosphatidylinositol N-acetylglucosaminyltransferase subunit A [EC:2.4.1.198] | (RefSeq) phosphatidylinositol N-acetylglucosaminyltransferase subunit A-like isoform X1 (A)	ko00563: Glycosylphosphatidylinositol (GPI)-anchor biosynthesis; ko01100: Metabolic pathways
TraesCS5D02G131500	1.96972	0.00102025	0.0045508	up	K03921 acyl-[acyl-carrier-protein] desaturase [EC:1.14.19.2 1.14.19.11 1.14.19.26] | (RefSeq) stearoyl-[acyl-carrier-protein] 9-desaturase 5, chloroplastic-like (A)	ko00061: Fatty acid biosynthesis; ko01040: Biosynthesis of unsaturated fatty acids; ko01100: Metabolic pathways; ko01212: Fatty acid metabolism
TraesCS5D02G127300	2.10789	0.000456783	0.00228776	up	K00128 aldehyde dehydrogenase (NAD+) [EC:1.2.1.3] | (RefSeq) aldehyde dehydrogenase family 3 member H1-like (A)	ko00010: Glycolysis / Gluconeogenesis; ko00053: Ascorbate and aldarate metabolism; ko00071: Fatty acid degradation; ko00280: Valine, leucine and isoleucine degradation; ko00310: Lysine degradation; ko00330: Arginine and proline metabolism; ko00340: Histidine metabolism; ko00380: Tryptophan metabolism; ko00410: beta-Alanine metabolism; ko00561: Glycerolipid metabolism; ko00620: Pyruvate metabolism…
TraesCS5D02G116100	1.18487	0.000307183	0.00161804	up	K13424 WRKY transcription factor 33 | (RefSeq) WRKY19; WRKY transcription factor 19 (A)	ko04016: MAPK signaling pathway - plant; ko04626: Plant-pathogen interaction
TraesCS5D02G110400	-1.90676	9.84525e-05	0.000597521	down	K00787 farnesyl diphosphate synthase [EC:2.5.1.1 2.5.1.10] | (RefSeq) putative WEB family protein At4g17210 (A)	ko00900: Terpenoid backbone biosynthesis; ko01100: Metabolic pathways; ko01110: Biosynthesis of secondary metabolites
TraesCS5D02G107600	1.69866	1.07096e-08	1.59572e-07	up	K10144 RING finger and CHY zinc finger domain-containing protein 1 [EC:2.3.2.27] | (RefSeq) E3 ubiquitin-protein ligase MIEL1-like (A)	ko04120: Ubiquitin mediated proteolysis
TraesCS5D02G106300	1.22372	3.03655e-07	3.43291e-06	up	K01867 tryptophanyl-tRNA synthetase [EC:6.1.1.2] | (RefSeq) tryptophan--tRNA ligase, cytoplasmic-like (A)	ko00970: Aminoacyl-tRNA biosynthesis
TraesCS5D02G106000	-1.07081	0.00553327	0.0189448	down	K05288 GPI ethanolamine phosphate transferase 3 subunit O [EC:2.7.-.-] | (RefSeq) GPI ethanolamine phosphate transferase 3-like (A)	ko00563: Glycosylphosphatidylinositol (GPI)-anchor biosynthesis; ko01100: Metabolic pathways
TraesCS5D02G105900	-1.8503	1.78323e-05	0.000132663	down	K13447 respiratory burst oxidase [EC:1.6.3.- 1.11.1.-] | (RefSeq) respiratory burst oxidase homolog protein B-like (A)	ko04016: MAPK signaling pathway - plant; ko04626: Plant-pathogen interaction
TraesCS5D02G104600	1.03563	0.00143959	0.00609536	up	K00940 nucleoside-diphosphate kinase [EC:2.7.4.6] | (RefSeq) nucleoside diphosphate kinase 2, chloroplastic-like (A)	ko00230: Purine metabolism; ko00240: Pyrimidine metabolism; ko01100: Metabolic pathways; ko01110: Biosynthesis of secondary metabolites; ko01232: Nucleotide metabolism; ko01240: Biosynthesis of cofactors; ko04016: MAPK signaling pathway - plant
TraesCS5D02G102900	-2.24694	1.6656e-11	4.02226e-10	down	K01184 polygalacturonase [EC:3.2.1.15] | (RefSeq) polygalacturonase ADPG2-like (A)	ko00040: Pentose and glucuronate interconversions; ko01100: Metabolic pathways
TraesCS5D02G101200	-1.02746	2.15527e-05	0.00015668	down	K03017 DNA-directed RNA polymerase II subunit RPB9 | (RefSeq) DNA-directed RNA polymerases II, IV and V subunit 9B (A)	ko03020: RNA polymerase
TraesCS5D02G095000	2.34255	0.00756287	0.024589	up	K13513 lysocardiolipin and lysophospholipid acyltransferase [EC:2.3.1.- 2.3.1.51] | (RefSeq) probable 1-acyl-sn-glycerol-3-phosphate acyltransferase 4 isoform X1 (A)	ko00561: Glycerolipid metabolism; ko00564: Glycerophospholipid metabolism; ko01100: Metabolic pathways; ko01110: Biosynthesis of secondary metabolites
TraesCS5D02G084800	-1.11177	7.4028e-05	0.000464761	down	K02936 large subunit ribosomal protein L7Ae | (RefSeq) uncharacterized protein LOC108459204 (A)	ko03010: Ribosome
TraesCS5D02G081800	2.39749	4.51513e-18	2.44695e-16	up	K13459 disease resistance protein RPS2 | (RefSeq) probable disease resistance protein At4g27220 (A)	ko04626: Plant-pathogen interaction
TraesCS5D02G073900	1.3158	0.00774165	0.0250439	up	K13429 chitin elicitor receptor kinase 1 | (RefSeq) chitin elicitor receptor kinase 1-like (A)	ko04626: Plant-pathogen interaction
TraesCS5D02G070900	1.36207	1.6336e-12	4.52754e-11	up	K03639 GTP 3',8-cyclase [EC:4.1.99.22] | (RefSeq) GTP 3',8-cyclase, mitochondrial (A)	ko00790: Folate biosynthesis; ko01100: Metabolic pathways; ko01240: Biosynthesis of cofactors; ko04122: Sulfur relay system
TraesCS5D02G069300	-1.74027	0.00128149	0.00551462	down	K14484 auxin-responsive protein IAA | (RefSeq) auxin-responsive protein IAA30-like (A)	ko04075: Plant hormone signal transduction
TraesCS5D02G069200	-2.45117	0.0104905	0.0320942	down	K14484 auxin-responsive protein IAA | (RefSeq) auxin-responsive protein IAA31-like (A)	ko04075: Plant hormone signal transduction
TraesCS5D02G068000	-9.24771	4.96388e-24	4.68285e-22	down	K13448 calcium-binding protein CML | (RefSeq) neo-calmodulin-like (A)	ko04626: Plant-pathogen interaction
TraesCS5D02G057900	1.48747	0.0109386	0.0332296	up	K01681 aconitate hydratase [EC:4.2.1.3] | (RefSeq) putative aconitate hydratase, cytoplasmic (A)	ko00020: Citrate cycle (TCA cycle); ko00630: Glyoxylate and dicarboxylate metabolism; ko01100: Metabolic pathways; ko01110: Biosynthesis of secondary metabolites; ko01200: Carbon metabolism; ko01210: 2-Oxocarboxylic acid metabolism; ko01230: Biosynthesis of amino acids
TraesCS5D02G054600	-1.071	0.00234639	0.00922517	down	K02970 small subunit ribosomal protein S21 | (RefSeq) uncharacterized protein LOC109744549 (A)	ko03010: Ribosome
TraesCS5D02G045700	-1.29155	2.35718e-07	2.71971e-06	down	K14486 auxin response factor | (RefSeq) auxin response factor 5-like isoform X1 (A)	ko04075: Plant hormone signal transduction
TraesCS5D02G038100	3.84787	2.39904e-09	4.04427e-08	up	K00430 peroxidase [EC:1.11.1.7] | (RefSeq) uncharacterized protein LOC109784706 (A)	ko00940: Phenylpropanoid biosynthesis; ko01100: Metabolic pathways; ko01110: Biosynthesis of secondary metabolites
TraesCS5D02G031500	1.01555	3.17034e-06	2.83533e-05	up	K20457 dihydrofolate synthase [EC:6.3.2.12] | (RefSeq) dihydrofolate synthetase (A)	ko00790: Folate biosynthesis; ko01100: Metabolic pathways; ko01240: Biosynthesis of cofactors
TraesCS5D02G025300	2.63582	0.000131274	0.000767749	up	K12828 splicing factor 3B subunit 1 | (RefSeq) splicing factor 3B subunit 1-like (A)	ko03040: Spliceosome
TraesCS5D02G014800	1.34626	1.72467e-09	2.97014e-08	up	K10666 E3 ubiquitin-protein ligase RNF5 [EC:2.3.2.27] | (RefSeq) E3 ubiquitin-protein ligase RNF5-like (A)	ko04141: Protein processing in endoplasmic reticulum
TraesCS5D02G004900	3.02565	0.00346875	0.0128484	up	K04123 ent-kaurenoic acid monooxygenase [EC:1.14.14.107] | (RefSeq) hypothetical protein (A)	ko00904: Diterpenoid biosynthesis; ko01100: Metabolic pathways; ko01110: Biosynthesis of secondary metabolites
TraesCS5B02G561500	1.1273	9.74062e-06	7.77187e-05	up	K14290 exportin-1 | (RefSeq) protein EXPORTIN 1A-like (A)	ko03008: Ribosome biogenesis in eukaryotes; ko03013: Nucleocytoplasmic transport; ko03250: Viral life cycle - HIV-1
TraesCS5B02G560800	-2.27597	0.000362964	0.00187566	down	K01051 pectinesterase [EC:3.1.1.11] | (RefSeq) putative pectinesterase/pectinesterase inhibitor 28 (A)	ko00040: Pentose and glucuronate interconversions; ko01100: Metabolic pathways
TraesCS5B02G551900	-1.84773	6.30299e-06	5.28195e-05	down	K14399 polyribonucleotide 5'-hydroxyl-kinase [EC:2.7.1.78] | (RefSeq) Clp1-domain-containing protein (A)	ko03015: mRNA surveillance pathway
TraesCS5B02G531800	1.08859	4.72141e-05	0.00031318	up	K08081 tropinone reductase I [EC:1.1.1.206] | (RefSeq) tropinone reductase homolog At2g29370-like isoform X1 (A)	ko00960: Tropane, piperidine and pyridine alkaloid biosynthesis; ko01100: Metabolic pathways; ko01110: Biosynthesis of secondary metabolites
TraesCS5B02G530800	2.38984	1.48986e-08	2.16203e-07	up	K07904 Ras-related protein Rab-11A | (RefSeq) ras-related protein RABA2a-like (A)	ko04144: Endocytosis
TraesCS5B02G528900	2.26824	3.83254e-05	0.000260714	up	K13496 UDP-glucosyltransferase 73C [EC:2.4.1.-] | (RefSeq) UDP-glycosyltransferase 73E1-like (A)	ko00908: Zeatin biosynthesis; ko01110: Biosynthesis of secondary metabolites
TraesCS5B02G516300	3.3805	3.31168e-08	4.52123e-07	up	K09843 (+)-abscisic acid 8'-hydroxylase [EC:1.14.14.137] | (RefSeq) abscisic acid 8'-hydroxylase 1 isoform X2 (A)	ko00906: Carotenoid biosynthesis; ko01110: Biosynthesis of secondary metabolites
TraesCS5B02G507200	1.59525	3.0009e-08	4.13601e-07	up	K08726 soluble epoxide hydrolase / lipid-phosphate phosphatase [EC:3.3.2.10 3.1.3.76] | (RefSeq) uncharacterized protein LOC119283936 (A)	ko00590: Arachidonic acid metabolism; ko01100: Metabolic pathways; ko04146: Peroxisome
TraesCS5B02G505800	1.08144	0.00343624	0.0127465	up	K01681 aconitate hydratase [EC:4.2.1.3] | (RefSeq) putative aconitate hydratase, cytoplasmic (A)	ko00020: Citrate cycle (TCA cycle); ko00630: Glyoxylate and dicarboxylate metabolism; ko01100: Metabolic pathways; ko01110: Biosynthesis of secondary metabolites; ko01200: Carbon metabolism; ko01210: 2-Oxocarboxylic acid metabolism; ko01230: Biosynthesis of amino acids
TraesCS5B02G504000	1.91848	5.88006e-05	0.000378854	up	K19355 mannan endo-1,4-beta-mannosidase [EC:3.2.1.78] | (RefSeq) mannan endo-1,4-beta-mannosidase 3-like (A)	ko00051: Fructose and mannose metabolism; ko01100: Metabolic pathways
TraesCS5B02G502200	-1.10921	0.000640613	0.00306388	down	K09291 nucleoprotein TPR | (RefSeq) LOW QUALITY PROTEIN: nuclear-pore anchor (A)	ko03013: Nucleocytoplasmic transport
TraesCS5B02G500700	1.61467	0.00302291	0.0114264	up	K13227 UDP-glucosyltransferase BX8/BX9 [EC:2.4.1.202] | (RefSeq) DIMBOA UDP-glucosyltransferase BX8-like (A)	ko00402: Benzoxazinoid biosynthesis; ko01110: Biosynthesis of secondary metabolites
TraesCS5B02G500500	2.07612	0.00503975	0.0175403	up	K00721 dolichol-phosphate mannosyltransferase [EC:2.4.1.83] | (RefSeq) dolichol-phosphate mannosyltransferase subunit 1-like (A)	ko00510: N-Glycan biosynthesis; ko01100: Metabolic pathways
TraesCS5B02G497700	2.11738	0.00647251	0.0216276	up	K01427 urease [EC:3.5.1.5] | (RefSeq) urease (A)	ko00220: Arginine biosynthesis; ko00230: Purine metabolism; ko01100: Metabolic pathways
TraesCS5B02G495500	-1.67905	2.98576e-17	1.46522e-15	down	K09562 hsp70-interacting protein | (RefSeq) hsp70-binding protein 1-like isoform X1 (A)	ko04141: Protein processing in endoplasmic reticulum
TraesCS5B02G494200	-1.08421	0.00967856	0.0300346	down	K13457 disease resistance protein RPM1 | (RefSeq) disease resistance protein RPM1-like (A)	ko04626: Plant-pathogen interaction
TraesCS5B02G489100	1.26427	0.000564421	0.00274837	up	K05917 sterol 14alpha-demethylase [EC:1.14.14.154 1.14.15.36] | (RefSeq) obtusifoliol 14-alpha demethylase-like (A)	ko00100: Steroid biosynthesis; ko01100: Metabolic pathways; ko01110: Biosynthesis of secondary metabolites
TraesCS5B02G487400	1.15205	8.40966e-06	6.80534e-05	up	K01254 leukotriene-A4 hydrolase [EC:3.3.2.6] | (RefSeq) leucine aminopeptidase-like (A)	ko00590: Arachidonic acid metabolism; ko01100: Metabolic pathways
TraesCS5B02G486300	1.21934	3.2807e-06	2.92425e-05	up	K03103 multiple inositol-polyphosphate phosphatase / 2,3-bisphosphoglycerate 3-phosphatase [EC:3.1.3.62 3.1.3.80] | (RefSeq) multiple inositol polyphosphate phosphatase 1-like (A)	ko00010: Glycolysis / Gluconeogenesis; ko00562: Inositol phosphate metabolism; ko01100: Metabolic pathways
TraesCS5B02G485000	4.47721	2.70 × 10-33	5.20 × 10-31	up	K13224 indolin-2-one monooxygenase [EC:1.14.14.157] | (RefSeq) indolin-2-one monooxygenase-like (A)	ko00402: Benzoxazinoid biosynthesis; ko01110: Biosynthesis of secondary metabolites
TraesCS5B02G481300	1.02329	0.0012261	0.00531561	up	K13434 pathogenesis-related genes transcriptional activator PTI6 | (RefSeq) pathogenesis-related genes transcriptional activator PTI6-like (A)	ko04626: Plant-pathogen interaction
TraesCS5B02G481000	-1.07147	0.000357906	0.00185221	down	K00297 methylenetetrahydrofolate reductase (NADH) [EC:1.5.1.54] | (RefSeq) probable methylenetetrahydrofolate reductase (A)	ko00670: One carbon pool by folate; ko01100: Metabolic pathways; ko01200: Carbon metabolism
TraesCS5B02G479900	1.31202	0.0130318	0.0383365	up	K05665 ATP-binding cassette, subfamily C (CFTR/MRP), member 1 [EC:7.6.2.3] | (RefSeq) ABC transporter C family member 4-like (A)	ko02010: ABC transporters
TraesCS5B02G477000	1.71979	4.29936e-05	0.000288295	up	K14674 TAG lipase / steryl ester hydrolase / phospholipase A2 / LPA acyltransferase [EC:3.1.1.3 3.1.1.13 3.1.1.4 2.3.1.51] | (RefSeq) triacylglycerol lipase SDP1-like (A)	ko00100: Steroid biosynthesis; ko00561: Glycerolipid metabolism; ko00564: Glycerophospholipid metabolism; ko00565: Ether lipid metabolism; ko00590: Arachidonic acid metabolism; ko00591: Linoleic acid metabolism; ko00592: alpha-Linolenic acid metabolism; ko01100: Metabolic pathways; ko01110: Biosynthesis of secondary metabolites
TraesCS5B02G459100	-2.12932	2.19331e-07	2.54601e-06	down	K00472 prolyl 4-hydroxylase [EC:1.14.11.2] | (RefSeq) probable prolyl 4-hydroxylase 7 (A)	ko00330: Arginine and proline metabolism; ko01100: Metabolic pathways
TraesCS5B02G451500	1.10595	0.000870606	0.00398636	up	K01728 pectate lyase [EC:4.2.2.2] | (RefSeq) probable pectate lyase 3 isoform X1 (A)	ko00040: Pentose and glucuronate interconversions; ko01100: Metabolic pathways
TraesCS5B02G451100	-1.87046	0.00082555	0.00381303	down	K14399 polyribonucleotide 5'-hydroxyl-kinase [EC:2.7.1.78] | (RefSeq) Clp1-domain-containing protein (A)	ko03015: mRNA surveillance pathway
TraesCS5B02G449300	-2.43581	0.0103215	0.0316606	down	K05391 cyclic nucleotide gated channel, plant | (RefSeq) cyclic nucleotide-gated ion channel 1-like (A)	ko04626: Plant-pathogen interaction
TraesCS5B02G446100	-2.48001	3.29351e-10	6.42018e-09	down	K14484 auxin-responsive protein IAA | (RefSeq) auxin-responsive protein IAA14-like (A)	ko04075: Plant hormone signal transduction
TraesCS5B02G439900	-1.75391	0.00443015	0.0157433	down	K13258 2-hydroxyisoflavanone dehydratase [EC:4.2.1.105] | (RefSeq) uncharacterized protein LOC115994703 (A)	ko00943: Isoflavonoid biosynthesis; ko01100: Metabolic pathways; ko01110: Biosynthesis of secondary metabolites
TraesCS5B02G437100	-1.10342	0.00646876	0.0216211	down	K00261 glutamate dehydrogenase (NAD(P)+) [EC:1.4.1.3] | (RefSeq) glutamate dehydrogenase 1, mitochondrial-like (A)	ko00220: Arginine biosynthesis; ko00250: Alanine, aspartate and glutamate metabolism; ko00910: Nitrogen metabolism; ko01100: Metabolic pathways; ko01200: Carbon metabolism
TraesCS5B02G434200	2.76454	1.50114e-05	0.000114025	up	K02734 20S proteasome subunit beta 4 [EC:3.4.25.1] | (RefSeq) uncharacterized protein LOC123117148 (A)	ko03050: Proteasome
TraesCS5B02G433700	2.79166	5.93556e-05	0.000382107	up	K03231 elongation factor 1-alpha | (RefSeq) uncharacterized protein LOC117852377 isoform X1 (A)	ko03013: Nucleocytoplasmic transport
TraesCS5B02G433600	2.45147	0.000523743	0.00257491	up	K03231 elongation factor 1-alpha | (RefSeq) uncharacterized protein LOC117852377 isoform X1 (A)	ko03013: Nucleocytoplasmic transport
TraesCS5B02G431000	1.50887	0.00276511	0.0106003	up	K13435 serine/threonine-protein kinase Pto | (RefSeq) receptor-like protein kinase HERK 1 isoform X2 (A)	ko04626: Plant-pathogen interaction
TraesCS5B02G429600	3.17507	0.00018994	0.00106349	up	K11817 indole-3-acetaldehyde oxidase [EC:1.2.3.7] | (RefSeq) indole-3-acetaldehyde oxidase-like (A)	ko00380: Tryptophan metabolism; ko01100: Metabolic pathways
TraesCS5B02G428000	-2.25894	6.79 × 10-48	3.27 × 10-43	down	K09503 DnaJ homolog subfamily A member 2 | (RefSeq) dnaJ protein homolog (A)	ko04141: Protein processing in endoplasmic reticulum
TraesCS5B02G427600	1.1212	0.00581191	0.0197308	up	K08486 syntaxin 1B/2/3 | (RefSeq) syntaxin-121-like (A)	ko04130: SNARE interactions in vesicular transport
TraesCS5B02G426900	1.40365	1.45045e-06	1.40909e-05	up	K10569 endonuclease VIII-like 3 | (RefSeq) hypothetical protein (A)	ko03410: Base excision repair
TraesCS5B02G426300	-2.88565	9.99791e-06	7.95106e-05	down	K00799 glutathione S-transferase [EC:2.5.1.18] | (RefSeq) probable glutathione S-transferase GSTU1 (A)	ko00480: Glutathione metabolism; ko01100: Metabolic pathways
TraesCS5B02G422400	-2.27821	0.0145357	0.0419032	down	K13475 R protein MLA10 | (RefSeq) disease resistance protein RGA5-like isoform X1 (A)	ko04626: Plant-pathogen interaction
TraesCS5B02G420000	1.60127	5.41139e-05	0.000352865	up	K01681 aconitate hydratase [EC:4.2.1.3] | (RefSeq) putative aconitate hydratase, cytoplasmic (A)	ko00020: Citrate cycle (TCA cycle); ko00630: Glyoxylate and dicarboxylate metabolism; ko01100: Metabolic pathways; ko01110: Biosynthesis of secondary metabolites; ko01200: Carbon metabolism; ko01210: 2-Oxocarboxylic acid metabolism; ko01230: Biosynthesis of amino acids
TraesCS5B02G419300	-1.66777	0.000391663	0.00200306	down	K01807 ribose 5-phosphate isomerase A [EC:5.3.1.6] | (RefSeq) probable ribose-5-phosphate isomerase 4, chloroplastic isoform X1 (A)	ko00030: Pentose phosphate pathway; ko00710: Carbon fixation in photosynthetic organisms; ko01100: Metabolic pathways; ko01110: Biosynthesis of secondary metabolites; ko01200: Carbon metabolism; ko01230: Biosynthesis of amino acids
TraesCS5B02G418700	-3.31826	3.23854e-16	1.43165e-14	down	K07375 tubulin beta | (RefSeq) tubulin beta-4 chain (A)	ko04145: Phagosome
TraesCS5B02G418200	-1.16782	4.0668e-07	4.44944e-06	down	K03231 elongation factor 1-alpha | (RefSeq) elongation factor 1-alpha-like isoform X1 (A)	ko03013: Nucleocytoplasmic transport
TraesCS5B02G418100	-1.1502	2.01074e-05	0.000147355	down	K03231 elongation factor 1-alpha | (RefSeq) elongation factor 1-alpha-like isoform X1 (A)	ko03013: Nucleocytoplasmic transport
TraesCS5B02G413100	-2.0643	7.86136e-07	8.0742e-06	down	K01081 5'-nucleotidase [EC:3.1.3.5] | (RefSeq) 5' nucleotidase family protein (A)	ko00230: Purine metabolism; ko00240: Pyrimidine metabolism; ko00760: Nicotinate and nicotinamide metabolism; ko01100: Metabolic pathways; ko01110: Biosynthesis of secondary metabolites; ko01232: Nucleotide metabolism
TraesCS5B02G412700	-2.66823	1.39057e-10	2.87967e-09	down	K07374 tubulin alpha | (RefSeq) tubulin alpha-2 chain-like (A)	ko04145: Phagosome
TraesCS5B02G412200	2.19926	5.13241e-12	1.32241e-10	up	K13415 protein brassinosteroid insensitive 1 [EC:2.7.10.1 2.7.11.1] | (RefSeq) protein BRASSINOSTEROID INSENSITIVE 1-like (A)	ko04075: Plant hormone signal transduction
TraesCS5B02G408400	-2.56648	4.52 × 10-39	1.38 × 10-36	down	K12189 ESCRT-II complex subunit VPS25 | (RefSeq) vacuolar protein sorting-associated protein 25-like isoform X3 (A)	ko04144: Endocytosis
TraesCS5B02G408300	-3.18014	9.59727e-20	6.36131e-18	down	K12189 ESCRT-II complex subunit VPS25 | (RefSeq) vacuolar protein sorting-associated protein 25-like isoform X3 (A)	ko04144: Endocytosis
TraesCS5B02G408100	1.54645	0.000276324	0.00147334	up	K01723 hydroperoxide dehydratase [EC:4.2.1.92] | (RefSeq) LOW QUALITY PROTEIN: allene oxide synthase 1, chloroplastic-like (A)	ko00592: alpha-Linolenic acid metabolism; ko01100: Metabolic pathways; ko01110: Biosynthesis of secondary metabolites
TraesCS5B02G408000	-3.43937	1.44604e-14	5.29785e-13	down	K01723 hydroperoxide dehydratase [EC:4.2.1.92] | (RefSeq) allene oxide synthase 1, chloroplastic-like (A)	ko00592: alpha-Linolenic acid metabolism; ko01100: Metabolic pathways; ko01110: Biosynthesis of secondary metabolites
TraesCS5B02G406900	2.17155	0.0057054	0.0194322	up	K14307 nucleoporin p58/p45 | (RefSeq) nuclear pore complex protein NUP58-like (A)	ko03013: Nucleocytoplasmic transport
TraesCS5B02G406800	1.08837	0.000157244	0.000899473	up	K03100 signal peptidase I [EC:3.4.21.89] | (RefSeq) probable thylakoidal processing peptidase 2, chloroplastic (A)	ko03060: Protein export
TraesCS5B02G406400	1.08556	6.53848e-06	5.45792e-05	up	K14498 serine/threonine-protein kinase SRK2 [EC:2.7.11.1] | (RefSeq) serine/threonine-protein kinase SAPK8 (A)	ko04016: MAPK signaling pathway - plant; ko04075: Plant hormone signal transduction
TraesCS5B02G406300	-1.70428	0.0156559	0.0445302	down	K14491 two-component response regulator ARR-B family | (RefSeq) two-component response regulator EHD1-like (A)	ko04075: Plant hormone signal transduction
TraesCS5B02G405400	-2.01387	2.0042e-07	2.34634e-06	down	K00430 peroxidase [EC:1.11.1.7] | (RefSeq) peroxidase 35-like (A)	ko00940: Phenylpropanoid biosynthesis; ko01100: Metabolic pathways; ko01110: Biosynthesis of secondary metabolites
TraesCS5B02G403600	-4.77823	8.96738e-09	1.36075e-07	down	K03860 phosphatidylinositol N-acetylglucosaminyltransferase subunit Q | (RefSeq) N-acetylglucosaminyl-phosphatidylinositol biosynthetic protein gpi1-like (A)	ko00563: Glycosylphosphatidylinositol (GPI)-anchor biosynthesis; ko01100: Metabolic pathways
TraesCS5B02G403100	2.49685	3.01157e-05	0.000210711	up	K13260 isoflavone/4'-methoxyisoflavone 2'-hydroxylase [EC:1.14.14.90 1.14.14.89] | (RefSeq) cytochrome P450 81E8-like (A)	ko00943: Isoflavonoid biosynthesis; ko01100: Metabolic pathways; ko01110: Biosynthesis of secondary metabolites
TraesCS5B02G403000	2.31046	1.7037e-16	7.73605e-15	up	K13260 isoflavone/4'-methoxyisoflavone 2'-hydroxylase [EC:1.14.14.90 1.14.14.89] | (RefSeq) cytochrome P450 81E8-like (A)	ko00943: Isoflavonoid biosynthesis; ko01100: Metabolic pathways; ko01110: Biosynthesis of secondary metabolites
TraesCS5B02G402900	2.20333	9.42625e-08	1.17258e-06	up	K13260 isoflavone/4'-methoxyisoflavone 2'-hydroxylase [EC:1.14.14.90 1.14.14.89] | (RefSeq) isoflavone 3'-hydroxylase-like (A)	ko00943: Isoflavonoid biosynthesis; ko01100: Metabolic pathways; ko01110: Biosynthesis of secondary metabolites
TraesCS5B02G402800	3.2524	7.39 × 10-66	1.20 × 10-62	up	K13260 isoflavone/4'-methoxyisoflavone 2'-hydroxylase [EC:1.14.14.90 1.14.14.89] | (RefSeq) cytochrome P450 81Q32-like (A)	ko00943: Isoflavonoid biosynthesis; ko01100: Metabolic pathways; ko01110: Biosynthesis of secondary metabolites
TraesCS5B02G401100	2.33748	0.00141575	0.00601879	up	K13457 disease resistance protein RPM1 | (RefSeq) disease resistance protein RPM1 (A)	ko04626: Plant-pathogen interaction
TraesCS5B02G399900	-2.29257	2.41436e-07	2.78268e-06	down	K12835 ATP-dependent RNA helicase DDX42 [EC:3.6.4.13] | (RefSeq) DEAD-box ATP-dependent RNA helicase 24 isoform X1 (A)	ko03040: Spliceosome
TraesCS5B02G399800	-6.53413	2.26047e-06	2.09317e-05	down	K00012 UDPglucose 6-dehydrogenase [EC:1.1.1.22] | (RefSeq) UDP-glucose 6-dehydrogenase 4 (A)	ko00040: Pentose and glucuronate interconversions; ko00053: Ascorbate and aldarate metabolism; ko00520: Amino sugar and nucleotide sugar metabolism; ko01100: Metabolic pathways; ko01240: Biosynthesis of cofactors; ko01250: Biosynthesis of nucleotide sugars
TraesCS5B02G399500	6.76472	6.98218e-14	2.33715e-12	up	K23452 UDP-glucosyltransferase 85A [EC:2.4.1.-] | (RefSeq) UDP-glycosyltransferase 85A3 (A)	ko00908: Zeatin biosynthesis; ko01110: Biosynthesis of secondary metabolites
TraesCS5B02G399200	2.9652	4.53032e-13	1.35757e-11	up	K23452 UDP-glucosyltransferase 85A [EC:2.4.1.-] | (RefSeq) UDP-glycosyltransferase 85A2 isoform X2 (A)	ko00908: Zeatin biosynthesis; ko01110: Biosynthesis of secondary metabolites
TraesCS5B02G398600	1.25139	0.00792212	0.0255212	up	K16266 cyanohydrin UDP-glucosyltransferase [EC:2.4.1.-] | (RefSeq) linamarin synthase 2 (A)	ko00460: Cyanoamino acid metabolism; ko01100: Metabolic pathways; ko01110: Biosynthesis of secondary metabolites
TraesCS5B02G389000	-1.43722	1.02184e-05	8.10469e-05	down	K01968 3-methylcrotonyl-CoA carboxylase alpha subunit [EC:6.4.1.4] | (RefSeq) LOW QUALITY PROTEIN: methylcrotonoyl-CoA carboxylase subunit alpha, mitochondrial (A)	ko00280: Valine, leucine and isoleucine degradation; ko01100: Metabolic pathways
TraesCS5B02G387300	1.23372	2.166e-08	3.04893e-07	up	K13811 3'-phosphoadenosine 5'-phosphosulfate synthase [EC:2.7.7.4 2.7.1.25] | (RefSeq) ATP sulfurylase 4, chloroplastic-like (A)	ko00230: Purine metabolism; ko00261: Monobactam biosynthesis; ko00450: Selenocompound metabolism; ko00920: Sulfur metabolism; ko01100: Metabolic pathways; ko01110: Biosynthesis of secondary metabolites
TraesCS5B02G387200	4.94104	2.67292e-12	7.19187e-11	up	K02183 calmodulin | (RefSeq) calmodulin-like protein 4 (A)	ko04016: MAPK signaling pathway - plant; ko04070: Phosphatidylinositol signaling system; ko04626: Plant-pathogen interaction
TraesCS5B02G381800	-2.61078	1.40021e-05	0.000107241	down	K14484 auxin-responsive protein IAA | (RefSeq) auxin-responsive protein IAA12-like (A)	ko04075: Plant hormone signal transduction
TraesCS5B02G381600	1.17246	0.00896832	0.0282186	up	K03116 sec-independent protein translocase protein TatA | (RefSeq) sec-independent protein translocase protein TATA, chloroplastic-like (A)	ko03060: Protein export
TraesCS5B02G380400	1.36052	0.00116691	0.00510119	up	K01968 3-methylcrotonyl-CoA carboxylase alpha subunit [EC:6.4.1.4] | (RefSeq) methylcrotonoyl-CoA carboxylase subunit alpha, mitochondrial (A)	ko00280: Valine, leucine and isoleucine degradation; ko01100: Metabolic pathways
TraesCS5B02G372300	1.61915	1.31044e-06	1.28521e-05	up	K14570 RNA exonuclease [EC:3.1.-.-] | (RefSeq) predicted protein (A)	ko03008: Ribosome biogenesis in eukaryotes
TraesCS5B02G372000	-3.03143	0.00108294	0.00478673	down	K01517 manganese-dependent ADP-ribose/CDP-alcohol diphosphatase [EC:3.6.1.13 3.6.1.16 3.6.1.53] | (RefSeq) manganese-dependent ADP-ribose/CDP-alcohol diphosphatase-like (A)	ko00230: Purine metabolism; ko00564: Glycerophospholipid metabolism; ko01100: Metabolic pathways
TraesCS5B02G364700	2.00819	3.98542e-05	0.000269848	up	K01728 pectate lyase [EC:4.2.2.2] | (RefSeq) pectate lyase 1-like (A)	ko00040: Pentose and glucuronate interconversions; ko01100: Metabolic pathways
TraesCS5B02G362700	1.30529	0.00042383	0.0021444	up	K05391 cyclic nucleotide gated channel, plant | (RefSeq) probable cyclic nucleotide-gated ion channel 14 (A)	ko04626: Plant-pathogen interaction
TraesCS5B02G358800	1.99116	0.00348025	0.0128803	up	K02291 15-cis-phytoene synthase [EC:2.5.1.32] | (RefSeq) phytoene synthase 2, chloroplastic-like (A)	ko00906: Carotenoid biosynthesis; ko01100: Metabolic pathways; ko01110: Biosynthesis of secondary metabolites
TraesCS5B02G336100	1.56009	0.00017558	0.000991635	up	K01115 phospholipase D1/2 [EC:3.1.4.4] | (RefSeq) phospholipase D delta-like (A)	ko00564: Glycerophospholipid metabolism; ko00565: Ether lipid metabolism; ko01100: Metabolic pathways; ko01110: Biosynthesis of secondary metabolites; ko04144: Endocytosis
TraesCS5B02G331600	-2.08364	1.54516e-08	2.2338e-07	down	K03094 S-phase kinase-associated protein 1 | (RefSeq) SKP1-like protein 1B (A)	ko04120: Ubiquitin mediated proteolysis; ko04141: Protein processing in endoplasmic reticulum
TraesCS5B02G331100	1.18807	1.54827e-06	1.49408e-05	up	K01735 3-dehydroquinate synthase [EC:4.2.3.4] | (RefSeq) 3-dehydroquinate synthase, chloroplastic-like (A)	ko00400: Phenylalanine, tyrosine and tryptophan biosynthesis; ko01100: Metabolic pathways; ko01110: Biosynthesis of secondary metabolites; ko01230: Biosynthesis of amino acids
TraesCS5B02G328200	-1.28238	0.00232364	0.0091485	down	K00276 primary-amine oxidase [EC:1.4.3.21] | (RefSeq) hypothetical protein (A)	ko00260: Glycine, serine and threonine metabolism; ko00350: Tyrosine metabolism; ko00360: Phenylalanine metabolism; ko00410: beta-Alanine metabolism; ko00950: Isoquinoline alkaloid biosynthesis; ko00960: Tropane, piperidine and pyridine alkaloid biosynthesis; ko01100: Metabolic pathways; ko01110: Biosynthesis of secondary metabolites
TraesCS5B02G326500	1.62316	2.88337e-05	0.000202509	up	K01373 cathepsin F [EC:3.4.22.41] | (RefSeq) cysteine proteinase 1-like (A)	ko04626: Plant-pathogen interaction
TraesCS5B02G322700	-1.15043	0.0130991	0.0384772	down	K15406 wax-ester synthase / diacylglycerol O-acyltransferase [EC:2.3.1.75 2.3.1.20] | (RefSeq) O-acyltransferase WSD1 (A)	ko00073: Cutin, suberine and wax biosynthesis
TraesCS5B02G321600	-1.0392	0.00420666	0.0150804	down	K12867 pre-mRNA-splicing factor SYF1 | (RefSeq) hypothetical protein (A)	ko03040: Spliceosome
TraesCS5B02G320200	1.10632	0.00500205	0.0174374	up	K22013 magnesium dechelatase [EC:4.99.1.10] | (RefSeq) protein STAY-GREEN, chloroplastic-like (A)	ko00860: Porphyrin metabolism; ko01110: Biosynthesis of secondary metabolites
TraesCS5B02G319700	-3.40779	8.80935e-17	4.11899e-15	down	K01183 chitinase [EC:3.2.1.14] | (RefSeq) xylanase inhibitor protein 1-like (A)	ko00520: Amino sugar and nucleotide sugar metabolism; ko01100: Metabolic pathways
TraesCS5B02G317700	-1.19351	4.85917e-05	0.000321282	down	K01179 endoglucanase [EC:3.2.1.4] | (RefSeq) endoglucanase 23-like (A)	ko00500: Starch and sucrose metabolism; ko01100: Metabolic pathways
TraesCS5B02G310600	-1.29116	0.000628224	0.00301027	down	K05286 GPI mannosyltransferase 3 [EC:2.4.1.-] | (RefSeq) mannosyltransferase APTG1-like (A)	ko00563: Glycosylphosphatidylinositol (GPI)-anchor biosynthesis; ko01100: Metabolic pathways
TraesCS5B02G305900	-1.13156	0.000103443	0.000623759	down	K01765 inositol-1,3,4-trisphosphate 5/6-kinase [EC:2.7.1.159] | (RefSeq) inositol-tetrakisphosphate 1-kinase 6-like (A)	ko00562: Inositol phosphate metabolism; ko01100: Metabolic pathways
TraesCS5B02G303900	6.19119	6.22247e-30	9.40226e-28	up	K01872 alanyl-tRNA synthetase [EC:6.1.1.7] | (RefSeq) alanine--tRNA ligase-like (A)	ko00970: Aminoacyl-tRNA biosynthesis
TraesCS5B02G303100	1.80556	2.40564e-07	2.77322e-06	up	K01069 hydroxyacylglutathione hydrolase [EC:3.1.2.6] | (RefSeq) probable hydroxyacylglutathione hydrolase 2, chloroplastic (A)	ko00620: Pyruvate metabolism; ko01100: Metabolic pathways
TraesCS5B02G302300	1.15108	0.000765196	0.00357096	up	K23558 plant 3beta-hydroxysteroid-4alpha-carboxylate 3-dehydrogenase [EC:1.1.1.418] | (RefSeq) 3beta-hydroxysteroid- dehydrogenase/decarboxylase-like (A)	ko00100: Steroid biosynthesis; ko01100: Metabolic pathways; ko01110: Biosynthesis of secondary metabolites
TraesCS5B02G300900	2.23286	6.16242e-10	1.14733e-08	up	K09648 mitochondrial inner membrane protease subunit 2 [EC:3.4.21.-] | (RefSeq) mitochondrial inner membrane protease subunit 2-like isoform X1 (A)	ko03060: Protein export
TraesCS5B02G294600	-1.10298	0.00269505	0.0103711	down	K01188 beta-glucosidase [EC:3.2.1.21] | (RefSeq) beta-glucosidase 31-like (A)	ko00460: Cyanoamino acid metabolism; ko00500: Starch and sucrose metabolism; ko00999: Biosynthesis of various plant secondary metabolites; ko01100: Metabolic pathways; ko01110: Biosynthesis of secondary metabolites
TraesCS5B02G290300	-1.48467	2.79556e-05	0.000197015	down	K12448 UDP-arabinose 4-epimerase [EC:5.1.3.5] | (RefSeq) probable UDP-arabinose 4-epimerase 1 isoform X1 (A)	ko00520: Amino sugar and nucleotide sugar metabolism; ko01100: Metabolic pathways; ko01250: Biosynthesis of nucleotide sugars
TraesCS5B02G289300	1.8693	0.00615239	0.0207354	up	K10875 DNA repair and recombination protein RAD54 and RAD54-like protein [EC:5.6.2.-] | (RefSeq) uncharacterized protein LOC123104662 (A)	ko03440: Homologous recombination
TraesCS5B02G284500	1.19538	1.27497e-06	1.25503e-05	up	K00876 uridine kinase [EC:2.7.1.48] | (RefSeq) uridine kinase-like protein 1, chloroplastic (A)	ko00240: Pyrimidine metabolism; ko01100: Metabolic pathways; ko01232: Nucleotide metabolism
TraesCS5B02G284000	-3.06105	8.52829e-11	1.81962e-09	down	K07375 tubulin beta | (RefSeq) uncharacterized protein LOC123070672 isoform X1 (A)	ko04145: Phagosome
TraesCS5B02G282100	-5.86766	8.45177e-17	3.96914e-15	down	K05278 flavonol synthase [EC:1.14.20.6] | (RefSeq) flavonol synthase/flavanone 3-hydroxylase-like (A)	ko00941: Flavonoid biosynthesis; ko01100: Metabolic pathways; ko01110: Biosynthesis of secondary metabolites
TraesCS5B02G275700	1.01771	0.00496213	0.0173186	up	K00306 sarcosine oxidase / L-pipecolate oxidase [EC:1.5.3.1 1.5.3.7] | (RefSeq) probable sarcosine oxidase (A)	ko00260: Glycine, serine and threonine metabolism; ko00310: Lysine degradation; ko01100: Metabolic pathways; ko04146: Peroxisome
TraesCS5B02G272800	1.17744	0.00706804	0.0232501	up	K03363 cell division cycle 20, cofactor of APC complex | (RefSeq) cell division cycle 20.2, cofactor of APC complex-like (A)	ko04120: Ubiquitin mediated proteolysis
TraesCS5B02G272600	-1.57301	5.31248e-05	0.000347475	down	K20547 basic endochitinase B [EC:3.2.1.14] | (RefSeq) chitinase 1-like (A)	ko00520: Amino sugar and nucleotide sugar metabolism; ko01100: Metabolic pathways; ko04016: MAPK signaling pathway - plant
TraesCS5B02G272000	1.0096	0.00110306	0.00486259	up	K09503 DnaJ homolog subfamily A member 2 | (RefSeq) mitochondrial protein import protein mas5-like (A)	ko04141: Protein processing in endoplasmic reticulum
TraesCS5B02G268800	1.05503	0.000228425	0.00124959	up	K09753 cinnamoyl-CoA reductase [EC:1.2.1.44] | (RefSeq) cinnamoyl-CoA reductase 1-like (A)	ko00940: Phenylpropanoid biosynthesis; ko01100: Metabolic pathways; ko01110: Biosynthesis of secondary metabolites
TraesCS5B02G265100	-2.51978	2.75743e-19	1.71905e-17	down	K01613 phosphatidylserine decarboxylase [EC:4.1.1.65] | (RefSeq) phosphatidylserine decarboxylase proenzyme 3-like (A)	ko00564: Glycerophospholipid metabolism; ko01100: Metabolic pathways; ko01110: Biosynthesis of secondary metabolites
TraesCS5B02G259900	1.70681	8.38185e-05	0.000518978	up	K13457 disease resistance protein RPM1 | (RefSeq) disease resistance protein RPM1 (A)	ko04626: Plant-pathogen interaction
TraesCS5B02G258900	-1.33924	2.64252e-06	2.41209e-05	down	K04079 molecular chaperone HtpG | (RefSeq) heat shock protein 81-3 (A)	ko04141: Protein processing in endoplasmic reticulum; ko04626: Plant-pathogen interaction
TraesCS5B02G257300	1.49714	0.000975306	0.00438433	up	K18835 WRKY transcription factor 2 | (RefSeq) probable WRKY transcription factor 2 (A)	ko04626: Plant-pathogen interaction
TraesCS5B02G257000	-3.93954	6.38176e-18	3.37981e-16	down	K13993 HSP20 family protein | (RefSeq) small heat shock protein, chloroplastic-like (A)	ko04141: Protein processing in endoplasmic reticulum
TraesCS5B02G255700	-1.0759	0.0174703	0.0486533	down	K13648 alpha-1,4-galacturonosyltransferase [EC:2.4.1.43] | (RefSeq) probable galacturonosyltransferase 4 (A)	ko00520: Amino sugar and nucleotide sugar metabolism; ko01100: Metabolic pathways
TraesCS5B02G249000	-1.18466	1.18704e-11	2.92497e-10	down	K09487 heat shock protein 90kDa beta | (RefSeq) heat shock protein 90-5, chloroplastic-like (A)	ko04141: Protein processing in endoplasmic reticulum; ko04626: Plant-pathogen interaction
TraesCS5B02G246900	2.04165	0.0120997	0.0360998	up	K00430 peroxidase [EC:1.11.1.7] | (RefSeq) peroxidase 17-like (A)	ko00940: Phenylpropanoid biosynthesis; ko01100: Metabolic pathways; ko01110: Biosynthesis of secondary metabolites
TraesCS5B02G245700	-3.59667	1.05 × 10-32	1.88719e-30	down	K13993 HSP20 family protein | (RefSeq) 16.9 kDa class I heat shock protein 1-like (A)	ko04141: Protein processing in endoplasmic reticulum
TraesCS5B02G245100	-1.30853	0.00114122	0.00500238	down	K00850 6-phosphofructokinase 1 [EC:2.7.1.11] | (RefSeq) ATP-dependent 6-phosphofructokinase 6-like (A)	ko00010: Glycolysis / Gluconeogenesis; ko00030: Pentose phosphate pathway; ko00051: Fructose and mannose metabolism; ko00052: Galactose metabolism; ko01100: Metabolic pathways; ko01110: Biosynthesis of secondary metabolites; ko01200: Carbon metabolism; ko01230: Biosynthesis of amino acids; ko03018: RNA degradation
TraesCS5B02G240800	-1.35314	2.61044e-05	0.000185435	down	K13258 2-hydroxyisoflavanone dehydratase [EC:4.2.1.105] | (RefSeq) uncharacterized protein LOC115994703 (A)	ko00943: Isoflavonoid biosynthesis; ko01100: Metabolic pathways; ko01110: Biosynthesis of secondary metabolites
TraesCS5B02G240700	2.17924	1.42451e-11	3.46823e-10	up	K17872 demethylphylloquinone reductase [EC:1.6.5.12] | (RefSeq) alternative NAD(P)H-ubiquinone oxidoreductase C1, chloroplastic/mitochondrial-like isoform X1 (A)	ko00130: Ubiquinone and other terpenoid-quinone biosynthesis; ko01100: Metabolic pathways; ko01110: Biosynthesis of secondary metabolites; ko01240: Biosynthesis of cofactors
TraesCS5B02G240200	-2.36081	6.68096e-05	0.00042508	down	K17872 demethylphylloquinone reductase [EC:1.6.5.12] | (RefSeq) alternative NAD(P)H-ubiquinone oxidoreductase C1, chloroplastic/mitochondrial-like isoform X1 (A)	ko00130: Ubiquinone and other terpenoid-quinone biosynthesis; ko01100: Metabolic pathways; ko01110: Biosynthesis of secondary metabolites; ko01240: Biosynthesis of cofactors
TraesCS5B02G240000	-2.00134	0.00449023	0.0159167	down	K13258 2-hydroxyisoflavanone dehydratase [EC:4.2.1.105] | (RefSeq) uncharacterized protein LOC115994703 (A)	ko00943: Isoflavonoid biosynthesis; ko01100: Metabolic pathways; ko01110: Biosynthesis of secondary metabolites
TraesCS5B02G239200	-1.32712	0.000970045	0.00436655	down	K14006 protein transport protein SEC23 | (RefSeq) protein transport protein SEC23-like isoform X1 (A)	ko04141: Protein processing in endoplasmic reticulum
TraesCS5B02G236500	-3.17319	1.32944e-14	4.89076e-13	down	K09843 (+)-abscisic acid 8'-hydroxylase [EC:1.14.14.137] | (RefSeq) abscisic acid 8'-hydroxylase 3-like (A)	ko00906: Carotenoid biosynthesis; ko01110: Biosynthesis of secondary metabolites
TraesCS5B02G235700	-3.08308	0.000203842	0.00113013	down	K12606 CCR4-NOT transcription complex subunit 9 | (RefSeq) CCR4-NOT transcription complex subunit 9-like (A)	ko03018: RNA degradation
TraesCS5B02G235600	1.48143	1.6926e-05	0.000126572	up	K14432 ABA responsive element binding factor | (RefSeq) bZIP transcription factor TRAB1-like isoform X1 (A)	ko04075: Plant hormone signal transduction
TraesCS5B02G233500	1.82595	7.45773e-10	1.36428e-08	up	K01051 pectinesterase [EC:3.1.1.11] | (RefSeq) putative pectinesterase/pectinesterase inhibitor 28 (A)	ko00040: Pentose and glucuronate interconversions; ko01100: Metabolic pathways
TraesCS5B02G231600	2.69381	4.66703e-07	5.04628e-06	up	K16084 ent-cassa-12,15-diene 11-hydroxylase / oryzalexin D synthase [EC:1.14.14.112 1.14.14.123] | (RefSeq) oryzalexin D synthase (A)	ko00904: Diterpenoid biosynthesis; ko01110: Biosynthesis of secondary metabolites
TraesCS5B02G231100	-1.0334	5.41284e-06	4.60672e-05	down	K01938 formate--tetrahydrofolate ligase [EC:6.3.4.3] | (RefSeq) formate--tetrahydrofolate ligase (A)	ko00670: One carbon pool by folate; ko01100: Metabolic pathways; ko01200: Carbon metabolism; ko01240: Biosynthesis of cofactors
TraesCS5B02G229300	-1.67404	0.00065304	0.00311412	down	K13457 disease resistance protein RPM1 | (RefSeq) disease resistance protein RPM1 (A)	ko04626: Plant-pathogen interaction
TraesCS5B02G225700	2.45559	1.16426e-12	3.28634e-11	up	K02704 photosystem II CP47 chlorophyll apoprotein | (RefSeq) psbB, TraeCp048; photosystem II 47 kDa protein (A)	ko00195: Photosynthesis; ko01100: Metabolic pathways
TraesCS5B02G223700	-2.33801	4.8177e-06	4.14507e-05	down	K09753 cinnamoyl-CoA reductase [EC:1.2.1.44] | (RefSeq) cinnamoyl-CoA reductase 1-like (A)	ko00940: Phenylpropanoid biosynthesis; ko01100: Metabolic pathways; ko01110: Biosynthesis of secondary metabolites
TraesCS5B02G223000	-1.1978	0.000121933	0.000719013	down	K06693 26S proteasome regulatory subunit N4 | (RefSeq) 26S proteasome non-ATPase regulatory subunit 9-like (A)	ko03050: Proteasome
TraesCS5B02G219900	-2.52311	2.12631e-10	4.29031e-09	down	K01081 5'-nucleotidase [EC:3.1.3.5] | (RefSeq) 5' nucleotidase family protein (A)	ko00230: Purine metabolism; ko00240: Pyrimidine metabolism; ko00760: Nicotinate and nicotinamide metabolism; ko01100: Metabolic pathways; ko01110: Biosynthesis of secondary metabolites; ko01232: Nucleotide metabolism
TraesCS5B02G212600	-10.0905	5.86202e-16	2.52667e-14	down	K07441 beta-1,4-N-acetylglucosaminyltransferase [EC:2.4.1.141] | (RefSeq) UDP-N-acetylglucosamine transferase subunit ALG14 homolog (A)	ko00510: N-Glycan biosynthesis; ko00513: Various types of N-glycan biosynthesis; ko01100: Metabolic pathways
TraesCS5B02G212500	-1.82626	0.00104321	0.00463748	down	K14488 SAUR family protein | (RefSeq) auxin-responsive protein SAUR36-like (A)	ko04075: Plant hormone signal transduction
TraesCS5B02G209800	-3.53568	8.31093e-28	1.0764e-25	down	K00083 cinnamyl-alcohol dehydrogenase [EC:1.1.1.195] | (RefSeq) ELI3-1; cinnamyl alcohol dehydrogenase 7 (A)	ko00940: Phenylpropanoid biosynthesis; ko01100: Metabolic pathways; ko01110: Biosynthesis of secondary metabolites
TraesCS5B02G208900	6.70826	2.11994e-09	3.60559e-08	up	K01206 alpha-L-fucosidase [EC:3.2.1.51] | (RefSeq) hypothetical protein (A)	ko00511: Other glycan degradation
TraesCS5B02G202700	-7.0871	3.16 × 10-42	1.22 × 10-39	down	K00083 cinnamyl-alcohol dehydrogenase [EC:1.1.1.195] | (RefSeq) probable mannitol dehydrogenase (A)	ko00940: Phenylpropanoid biosynthesis; ko01100: Metabolic pathways; ko01110: Biosynthesis of secondary metabolites
TraesCS5B02G202200	-1.6416	1.28299e-07	1.55405e-06	down	K16055 trehalose 6-phosphate synthase/phosphatase [EC:2.4.1.15 3.1.3.12] | (RefSeq) alpha,alpha-trehalose-phosphate synthase [UDP-forming] 6-like (A)	ko00500: Starch and sucrose metabolism; ko01100: Metabolic pathways; ko01110: Biosynthesis of secondary metabolites
TraesCS5B02G201100	-2.53544	4.79322e-12	1.2374e-10	down	K01179 endoglucanase [EC:3.2.1.4] | (RefSeq) endoglucanase 5 (A)	ko00500: Starch and sucrose metabolism; ko01100: Metabolic pathways
TraesCS5B02G199400	-2.43126	3.95434e-06	3.46183e-05	down	K20606 mitogen-activated protein kinase kinase kinase ANP1 [EC:2.7.11.25] | (RefSeq) mitogen-activated protein kinase kinase kinase NPK1-like (A)	ko04016: MAPK signaling pathway - plant
TraesCS5B02G197400	-2.99922	1.75739e-05	0.000130959	down	K10260 F-box and WD-40 domain protein 7 | (RefSeq) WD40 repeat protein (A)	ko04120: Ubiquitin mediated proteolysis
TraesCS5B02G193100	-1.30375	5.6603e-06	4.79977e-05	down	K01087 trehalose 6-phosphate phosphatase [EC:3.1.3.12] | (RefSeq) probable trehalose-phosphate phosphatase 7 (A)	ko00500: Starch and sucrose metabolism; ko01100: Metabolic pathways; ko01110: Biosynthesis of secondary metabolites
TraesCS5B02G193000	-4.82828	1.76 × 10-63	2.70 × 10-60	down	K19366 spartin | (RefSeq) senescence/dehydration-associated protein At4g35985, chloroplastic-like (A)	ko04144: Endocytosis
TraesCS5B02G191900	1.37766	1.19187e-05	9.28942e-05	up	K03635 molybdopterin synthase catalytic subunit [EC:2.8.1.12] | (RefSeq) molybdopterin synthase catalytic subunit-like (A)	ko00790: Folate biosynthesis; ko01100: Metabolic pathways; ko01240: Biosynthesis of cofactors; ko04122: Sulfur relay system
TraesCS5B02G190400	1.05047	1.31217e-05	0.000101223	up	K13175 THO complex subunit 6 | (RefSeq) THO complex subunit 6-like (A)	ko03013: Nucleocytoplasmic transport
TraesCS5B02G184100	1.00668	0.0116496	0.0350056	up	K04487 cysteine desulfurase [EC:2.8.1.7] | (RefSeq) cysteine desulfurase, mitochondrial-like (A)	ko00730: Thiamine metabolism; ko01100: Metabolic pathways; ko01240: Biosynthesis of cofactors; ko04122: Sulfur relay system
TraesCS5B02G183800	-4.2122	1.00173e-21	7.89141e-20	down	K16225 probable WRKY transcription factor 52 | (RefSeq) disease resistance protein RRS1-like (A)	ko04626: Plant-pathogen interaction
TraesCS5B02G183500	3.4027	2.60052e-10	5.16149e-09	up	K08711 ATP-binding cassette, subfamily G (WHITE), member 2, PDR | (RefSeq) ZEB2-regulated ABC transporter 1-like (A)	ko02010: ABC transporters
TraesCS5B02G183000	-1.87277	1.36666e-07	1.64683e-06	down	K13415 protein brassinosteroid insensitive 1 [EC:2.7.10.1 2.7.11.1] | (RefSeq) hypothetical protein (A)	ko04075: Plant hormone signal transduction
TraesCS5B02G182400	3.94092	5.23005e-05	0.000342795	up	K00485 dimethylaniline monooxygenase (N-oxide forming) / hypotaurine monooxygenase [EC:1.14.13.8 1.8.1.-] | (RefSeq) probable flavin-containing monooxygenase 1 (A)	ko00430: Taurine and hypotaurine metabolism; ko01100: Metabolic pathways
TraesCS5B02G182000	-3.57014	2.70 × 10-32	4.74 × 10-30	down	K14497 protein phosphatase 2C [EC:3.1.3.16] | (RefSeq) probable protein phosphatase 2C 68 (A)	ko04016: MAPK signaling pathway - plant; ko04075: Plant hormone signal transduction
TraesCS5B02G181500	1.62747	2.35557e-08	3.29496e-07	up	K13449 pathogenesis-related protein 1 | (RefSeq) pathogenesis-related protein PRB1-2-like (A)	ko04016: MAPK signaling pathway - plant; ko04075: Plant hormone signal transduction; ko04626: Plant-pathogen interaction
TraesCS5B02G181300	1.02097	0.00297291	0.0112653	up	K01784 UDP-glucose 4-epimerase [EC:5.1.3.2] | (RefSeq) UDP-glucose 4-epimerase 4-like (A)	ko00052: Galactose metabolism; ko00520: Amino sugar and nucleotide sugar metabolism; ko01100: Metabolic pathways; ko01250: Biosynthesis of nucleotide sugars
TraesCS5B02G176200	1.14755	1.02147e-05	8.10298e-05	up	K00975 glucose-1-phosphate adenylyltransferase [EC:2.7.7.27] | (RefSeq) putative two-component response regulator ARR21 (A)	ko00500: Starch and sucrose metabolism; ko00520: Amino sugar and nucleotide sugar metabolism; ko01100: Metabolic pathways; ko01110: Biosynthesis of secondary metabolites; ko01250: Biosynthesis of nucleotide sugars
TraesCS5B02G176100	1.24177	0.00242746	0.00949953	up	K13126 polyadenylate-binding protein | (RefSeq) polyadenylate-binding protein 8-like (A)	ko03015: mRNA surveillance pathway; ko03018: RNA degradation
TraesCS5B02G175300	1.62044	3.27212e-05	0.000226307	up	K03094 S-phase kinase-associated protein 1 | (RefSeq) uncharacterized protein LOC123043970 (A)	ko04120: Ubiquitin mediated proteolysis; ko04141: Protein processing in endoplasmic reticulum
TraesCS5B02G174200	2.10739	3.75365e-09	6.12143e-08	up	K21718 oryzalexin E synthase [EC:1.14.14.122] | (RefSeq) oryzalexin E synthase (A)	ko00904: Diterpenoid biosynthesis; ko01110: Biosynthesis of secondary metabolites
TraesCS5B02G166800	1.05379	1.97747e-05	0.000145275	up	K02433 aspartyl-tRNA(Asn)/glutamyl-tRNA(Gln) amidotransferase subunit A [EC:6.3.5.6 6.3.5.7] | (RefSeq) Glutamyl-tRNA(Gln) amidotransferase subunit A (A)	ko00970: Aminoacyl-tRNA biosynthesis; ko01100: Metabolic pathways
TraesCS5B02G165700	3.19573	3.35261e-05	0.000231188	up	K03094 S-phase kinase-associated protein 1 | (RefSeq) SKP1-like protein 1A (A)	ko04120: Ubiquitin mediated proteolysis; ko04141: Protein processing in endoplasmic reticulum
TraesCS5B02G165600	2.3779	0.000816614	0.00377926	up	K01176 alpha-amylase [EC:3.2.1.1] | (RefSeq) alpha-amylase isozyme 2A (A)	ko00500: Starch and sucrose metabolism; ko01100: Metabolic pathways; ko01110: Biosynthesis of secondary metabolites
TraesCS5B02G163500	-2.32287	0.00189289	0.00768863	down	K12135 zinc finger protein CONSTANS | (RefSeq) zinc finger protein CONSTANS-LIKE 2-like (A)	ko04712: Circadian rhythm - plant
TraesCS5B02G160500	1.27228	1.96543e-05	0.000144649	up	K13430 serine/threonine-protein kinase PBS1 [EC:2.7.11.1] | (RefSeq) serine/threonine-protein kinase CDL1-like (A)	ko04626: Plant-pathogen interaction
TraesCS5B02G159000	-1.47191	0.00630219	0.0211404	down	K13416 brassinosteroid insensitive 1-associated receptor kinase 1 [EC:2.7.10.1 2.7.11.1] | (RefSeq) dual specificity protein kinase zakA-like (A)	ko04016: MAPK signaling pathway - plant; ko04075: Plant hormone signal transduction; ko04626: Plant-pathogen interaction
TraesCS5B02G158000	-4.11929	1.5073e-05	0.000114444	down	K13416 brassinosteroid insensitive 1-associated receptor kinase 1 [EC:2.7.10.1 2.7.11.1] | (RefSeq) BRASSINOSTEROID INSENSITIVE 1-associated receptor kinase 1 (A)	ko04016: MAPK signaling pathway - plant; ko04075: Plant hormone signal transduction; ko04626: Plant-pathogen interaction
TraesCS5B02G155600	1.00805	0.000435054	0.0021929	up	K08711 ATP-binding cassette, subfamily G (WHITE), member 2, PDR | (RefSeq) ZEB2-regulated ABC transporter 1-like (A)	ko02010: ABC transporters
TraesCS5B02G155400	2.34459	8.13773e-06	6.61832e-05	up	K08711 ATP-binding cassette, subfamily G (WHITE), member 2, PDR | (RefSeq) LOW QUALITY PROTEIN: ZEB2-regulated ABC transporter 1-like (A)	ko02010: ABC transporters
TraesCS5B02G152600	-2.00391	3.51155e-28	4.70759e-26	down	K01953 asparagine synthase (glutamine-hydrolysing) [EC:6.3.5.4] | (RefSeq) asparagine synthetase [glutamine-hydrolyzing] (A)	ko00250: Alanine, aspartate and glutamate metabolism; ko01100: Metabolic pathways; ko01110: Biosynthesis of secondary metabolites; ko01230: Biosynthesis of amino acids
TraesCS5B02G152400	-3.69978	6.21501e-07	6.53896e-06	down	K13448 calcium-binding protein CML | (RefSeq) probable calcium-binding protein CML25/26 (A)	ko04626: Plant-pathogen interaction
TraesCS5B02G149300	-3.02057	0.000466349	0.00232892	down	K14497 protein phosphatase 2C [EC:3.1.3.16] | (RefSeq) protein phosphatase 2C 53-like (A)	ko04016: MAPK signaling pathway - plant; ko04075: Plant hormone signal transduction
TraesCS5B02G143800	-1.83816	0.0029303	0.0111291	down	K01522 bis(5'-adenosyl)-triphosphatase [EC:3.6.1.29] | (RefSeq) bifunctional bis(5'-adenosyl)-triphosphatase/adenylylsulfatase FHIT-like (A)	ko00230: Purine metabolism; ko01100: Metabolic pathways
TraesCS5B02G143200	-1.42908	0.0132088	0.0387495	down	K01489 cytidine deaminase [EC:3.5.4.5] | (RefSeq) cytidine deaminase 1-like (A)	ko00240: Pyrimidine metabolism; ko01100: Metabolic pathways; ko01232: Nucleotide metabolism
TraesCS5B02G137400	-1.76015	9.17297e-08	1.14454e-06	down	K12818 ATP-dependent RNA helicase DHX8/PRP22 [EC:3.6.4.13] | (RefSeq) hypothetical protein (A)	ko03040: Spliceosome
TraesCS5B02G136200	4.99077	7.46756e-21	5.44938e-19	up	K13065 shikimate O-hydroxycinnamoyltransferase [EC:2.3.1.133] | (RefSeq) tryptamine hydroxycinnamoyltransferase 1-like (A)	ko00940: Phenylpropanoid biosynthesis; ko00941: Flavonoid biosynthesis; ko00945: Stilbenoid, diarylheptanoid and gingerol biosynthesis; ko01100: Metabolic pathways; ko01110: Biosynthesis of secondary metabolites
TraesCS5B02G134200	1.06483	0.00373697	0.0136696	up	K13448 calcium-binding protein CML | (RefSeq) probable calcium-binding protein CML36 (A)	ko04626: Plant-pathogen interaction
TraesCS5B02G133800	4.76062	1.79854e-17	8.9822e-16	up	K14494 DELLA protein | (RefSeq) DELLA protein GAIP-B (A)	ko04075: Plant hormone signal transduction
TraesCS5B02G131500	-1.95268	8.0665e-17	3.79822e-15	down	K01953 asparagine synthase (glutamine-hydrolysing) [EC:6.3.5.4] | (RefSeq) asparagine synthetase [glutamine-hydrolyzing] 2-like (A)	ko00250: Alanine, aspartate and glutamate metabolism; ko01100: Metabolic pathways; ko01110: Biosynthesis of secondary metabolites; ko01230: Biosynthesis of amino acids
TraesCS5B02G130500	2.10452	5.4173e-08	7.05383e-07	up	K18081 myotubularin-related protein 1/2 [EC:3.1.3.64 3.1.3.95] | (RefSeq) phosphatidylinositol-3-phosphatase myotubularin-2-like (A)	ko00562: Inositol phosphate metabolism; ko01100: Metabolic pathways; ko04070: Phosphatidylinositol signaling system
TraesCS5B02G127300	-1.01673	0.00418531	0.0150129	down	K03844 alpha-1,2-mannosyltransferase [EC:2.4.1.131] | (RefSeq) alpha-1,2-mannosyltransferase (A)	ko00510: N-Glycan biosynthesis; ko00513: Various types of N-glycan biosynthesis; ko01100: Metabolic pathways
TraesCS5B02G121400	-1.06729	8.29148e-05	0.000514156	down	K00166 2-oxoisovalerate dehydrogenase E1 component alpha subunit [EC:1.2.4.4] | (RefSeq) 2-oxoisovalerate dehydrogenase subunit alpha 2, mitochondrial-like (A)	ko00280: Valine, leucine and isoleucine degradation; ko00640: Propanoate metabolism; ko01100: Metabolic pathways; ko01110: Biosynthesis of secondary metabolites
TraesCS5B02G120100	2.08973	4.53169e-07	4.90987e-06	up	K00128 aldehyde dehydrogenase (NAD+) [EC:1.2.1.3] | (RefSeq) aldehyde dehydrogenase family 3 member H1-like (A)	ko00010: Glycolysis / Gluconeogenesis; ko00053: Ascorbate and aldarate metabolism; ko00071: Fatty acid degradation; ko00280: Valine, leucine and isoleucine degradation; ko00310: Lysine degradation; ko00330: Arginine and proline metabolism; ko00340: Histidine metabolism; ko00380: Tryptophan metabolism; ko00410: beta-Alanine metabolism; ko00561: Glycerolipid metabolism; ko00620: Pyruvate metabolism…
TraesCS5B02G116300	-1.09805	0.00117796	0.00514107	down	K00627 pyruvate dehydrogenase E2 component (dihydrolipoamide acetyltransferase) [EC:2.3.1.12] | (RefSeq) dihydrolipoyllysine-residue acetyltransferase component 5 of pyruvate dehydrogenase complex, chloroplastic-like (A)	ko00010: Glycolysis / Gluconeogenesis; ko00020: Citrate cycle (TCA cycle); ko00620: Pyruvate metabolism; ko01100: Metabolic pathways; ko01110: Biosynthesis of secondary metabolites; ko01200: Carbon metabolism
TraesCS5B02G111700	1.21643	0.00026704	0.0014305	up	K14190 GDP-L-galactose phosphorylase [EC:2.7.7.69] | (RefSeq) GDP-L-galactose phosphorylase 2-like (A)	ko00053: Ascorbate and aldarate metabolism; ko01100: Metabolic pathways; ko01110: Biosynthesis of secondary metabolites; ko01240: Biosynthesis of cofactors
TraesCS5B02G105400	1.45728	6.77819e-07	7.07445e-06	up	K00942 guanylate kinase [EC:2.7.4.8] | (RefSeq) guanylate kinase 1-like (A)	ko00230: Purine metabolism; ko01100: Metabolic pathways; ko01232: Nucleotide metabolism
TraesCS5B02G100000	1.22896	4.04205e-10	7.76057e-09	up	K01867 tryptophanyl-tRNA synthetase [EC:6.1.1.2] | (RefSeq) tryptophan--tRNA ligase, cytoplasmic-like (A)	ko00970: Aminoacyl-tRNA biosynthesis
TraesCS5B02G099700	-1.95808	0.000436257	0.00219846	down	K13447 respiratory burst oxidase [EC:1.6.3.- 1.11.1.-] | (RefSeq) respiratory burst oxidase homolog protein B-like (A)	ko04016: MAPK signaling pathway - plant; ko04626: Plant-pathogen interaction
TraesCS5B02G098300	2.35521	0.000485189	0.00241017	up	K00940 nucleoside-diphosphate kinase [EC:2.7.4.6] | (RefSeq) nucleoside diphosphate kinase 2, chloroplastic-like (A)	ko00230: Purine metabolism; ko00240: Pyrimidine metabolism; ko01100: Metabolic pathways; ko01110: Biosynthesis of secondary metabolites; ko01232: Nucleotide metabolism; ko01240: Biosynthesis of cofactors; ko04016: MAPK signaling pathway - plant
TraesCS5B02G097100	-1.887	7.8299e-05	0.000488307	down	K01184 polygalacturonase [EC:3.2.1.15] | (RefSeq) probable polygalacturonase At3g15720 (A)	ko00040: Pentose and glucuronate interconversions; ko01100: Metabolic pathways
TraesCS5B02G095100	-1.30623	0.000314653	0.00165348	down	K03017 DNA-directed RNA polymerase II subunit RPB9 | (RefSeq) DNA-directed RNA polymerases II, IV and V subunit 9B (A)	ko03020: RNA polymerase
TraesCS5B02G092900	-1.23684	0.000297336	0.00157253	down	K12960 5-methylthioadenosine/S-adenosylhomocysteine deaminase [EC:3.5.4.31 3.5.4.28] | (RefSeq) uncharacterized protein LOC116244828 (A)	ko00270: Cysteine and methionine metabolism; ko01100: Metabolic pathways
TraesCS5B02G087700	-1.08626	0.00228264	0.0090043	down	K03283 heat shock 70kDa protein 1/2/6/8 | (RefSeq) heat shock cognate 70 kDa protein 2-like (A)	ko03040: Spliceosome; ko04141: Protein processing in endoplasmic reticulum; ko04144: Endocytosis
TraesCS5B02G082400	-1.61852	0.000785201	0.00365507	down	K00901 diacylglycerol kinase (ATP) [EC:2.7.1.107] | (RefSeq) diacylglycerol kinase 1-like isoform X1 (A)	ko00561: Glycerolipid metabolism; ko00564: Glycerophospholipid metabolism; ko01100: Metabolic pathways; ko01110: Biosynthesis of secondary metabolites; ko04070: Phosphatidylinositol signaling system
TraesCS5B02G078800	-1.08025	8.33002e-05	0.000516128	down	K02936 large subunit ribosomal protein L7Ae | (RefSeq) uncharacterized protein LOC108459204 (A)	ko03010: Ribosome
TraesCS5B02G075900	3.21554	1.21 × 10-34	2.64 × 10-32	up	K13459 disease resistance protein RPS2 | (RefSeq) probable disease resistance protein At4g27220 (A)	ko04626: Plant-pathogen interaction
TraesCS5B02G075800	1.76878	4.80572e-05	0.000318259	up	K14498 serine/threonine-protein kinase SRK2 [EC:2.7.11.1] | (RefSeq) serine/threonine-protein kinase SAPK9-like (A)	ko04016: MAPK signaling pathway - plant; ko04075: Plant hormone signal transduction
TraesCS5B02G074500	3.48612	1.1844e-11	2.92086e-10	up	K12126 phytochrome-interacting factor 3 | (RefSeq) transcription factor PHYTOCHROME INTERACTING FACTOR-LIKE 15 (A)	ko04075: Plant hormone signal transduction; ko04712: Circadian rhythm - plant
TraesCS5B02G073300	7.79596	2.28261e-08	3.1996e-07	up	K15777 4,5-DOPA dioxygenase extradiol [EC:1.13.11.-] | (RefSeq) B3 domain-containing protein Os12g0591400-like (A)	ko00965: Betalain biosynthesis; ko01110: Biosynthesis of secondary metabolites
TraesCS5B02G069900	2.58084	1.30772e-09	2.29344e-08	up	K13429 chitin elicitor receptor kinase 1 | (RefSeq) chitin elicitor receptor kinase 1-like (A)	ko04626: Plant-pathogen interaction
TraesCS5B02G066700	1.52459	3.077e-13	9.42121e-12	up	K03639 GTP 3',8-cyclase [EC:4.1.99.22] | (RefSeq) GTP 3',8-cyclase, mitochondrial-like (A)	ko00790: Folate biosynthesis; ko01100: Metabolic pathways; ko01240: Biosynthesis of cofactors; ko04122: Sulfur relay system
TraesCS5B02G064400	2.58976	0.000665322	0.00316507	up	K01176 alpha-amylase [EC:3.2.1.1] | (RefSeq) alpha-amylase isozyme 2A (A)	ko00500: Starch and sucrose metabolism; ko01100: Metabolic pathways; ko01110: Biosynthesis of secondary metabolites
TraesCS5B02G063300	-1.05449	0.000267286	0.00143143	down	K00547 homocysteine S-methyltransferase [EC:2.1.1.10] | (RefSeq) homocysteine S-methyltransferase 3 (A)	ko00270: Cysteine and methionine metabolism; ko01100: Metabolic pathways; ko01110: Biosynthesis of secondary metabolites
TraesCS5B02G060400	1.25995	0.00550293	0.018853	up	K17744 L-galactose dehydrogenase [EC:1.1.1.316] | (RefSeq) L-galactose dehydrogenase-like (A)	ko00053: Ascorbate and aldarate metabolism; ko01100: Metabolic pathways; ko01110: Biosynthesis of secondary metabolites; ko01240: Biosynthesis of cofactors
TraesCS5B02G059900	-6.8547	3.70 × 10-35	8.42 × 10-33	down	K13448 calcium-binding protein CML | (RefSeq) neo-calmodulin-like (A)	ko04626: Plant-pathogen interaction
TraesCS5B02G059800	1.09992	5.21049e-06	4.45436e-05	up	K13258 2-hydroxyisoflavanone dehydratase [EC:4.2.1.105] | (RefSeq) uncharacterized protein LOC115994703 (A)	ko00943: Isoflavonoid biosynthesis; ko01100: Metabolic pathways; ko01110: Biosynthesis of secondary metabolites
TraesCS5B02G058800	-3.22551	0.000672571	0.00319303	down	K14484 auxin-responsive protein IAA | (RefSeq) auxin-responsive protein IAA31-like (A)	ko04075: Plant hormone signal transduction
TraesCS5B02G058500	-1.3188	0.00417001	0.0149701	down	K14484 auxin-responsive protein IAA | (RefSeq) auxin-responsive protein IAA30-like (A)	ko04075: Plant hormone signal transduction
TraesCS5B02G053300	-1.06324	9.06363e-07	9.20299e-06	down	K13029 4-hydroxyphenylacetaldehyde oxime monooxygenase [EC:1.14.14.37] | (RefSeq) 4-hydroxyphenylacetaldehyde oxime monooxygenase-like (A)	ko00460: Cyanoamino acid metabolism; ko01100: Metabolic pathways; ko01110: Biosynthesis of secondary metabolites
TraesCS5B02G053000	1.03727	0.00142392	0.00604297	up	K15397 3-ketoacyl-CoA synthase [EC:2.3.1.199] | (RefSeq) 3-ketoacyl-CoA synthase 19-like (A)	ko00062: Fatty acid elongation; ko01100: Metabolic pathways; ko01110: Biosynthesis of secondary metabolites; ko04626: Plant-pathogen interaction
TraesCS5B02G039800	-1.02027	0.000367241	0.00189465	down	K14486 auxin response factor | (RefSeq) auxin response factor 5-like (A)	ko04075: Plant hormone signal transduction
TraesCS5B02G039200	1.83129	0.000102481	0.000618914	up	K04123 ent-kaurenoic acid monooxygenase [EC:1.14.14.107] | (RefSeq) ent-kaurenoic acid oxidase 2-like (A)	ko00904: Diterpenoid biosynthesis; ko01100: Metabolic pathways; ko01110: Biosynthesis of secondary metabolites
TraesCS5B02G035000	1.32961	7.08831e-05	0.000447168	up	K05391 cyclic nucleotide gated channel, plant | (RefSeq) cyclic nucleotide-gated ion channel 1-like (A)	ko04626: Plant-pathogen interaction
TraesCS5B02G028700	1.66105	9.09643e-07	9.23454e-06	up	K14539 large subunit GTPase 1 [EC:3.6.1.-] | (RefSeq) GTPase LSG1-1-like (A)	ko03008: Ribosome biogenesis in eukaryotes
TraesCS5B02G028300	-2.3097	3.73606e-05	0.000254965	down	K08081 tropinone reductase I [EC:1.1.1.206] | (RefSeq) noroxomaritidine/norcraugsodine reductase-like (A)	ko00960: Tropane, piperidine and pyridine alkaloid biosynthesis; ko01100: Metabolic pathways; ko01110: Biosynthesis of secondary metabolites
TraesCS5B02G028100	-2.5351	3.24264e-07	3.64082e-06	down	K00423 L-ascorbate oxidase [EC:1.10.3.3] | (RefSeq) LOW QUALITY PROTEIN: L-ascorbate oxidase (A)	ko00053: Ascorbate and aldarate metabolism; ko01100: Metabolic pathways
TraesCS5B02G026500	2.81429	0.0012687	0.00546721	up	K13457 disease resistance protein RPM1 | (RefSeq) disease resistance protein RPM1 (A)	ko04626: Plant-pathogen interaction
TraesCS5B02G023700	-1.47451	2.65551e-05	0.000188112	down	K12450 UDP-glucose 4,6-dehydratase [EC:4.2.1.76] | (RefSeq) trifunctional UDP-glucose 4,6-dehydratase/UDP-4-keto-6-deoxy-D-glucose 3,5-epimerase/UDP-4-keto-L-rhamnose-reductase RHM1-like (A)	ko00520: Amino sugar and nucleotide sugar metabolism; ko01100: Metabolic pathways; ko01250: Biosynthesis of nucleotide sugars
TraesCS5B02G017900	1.51813	0.00150706	0.00633697	up	K02291 15-cis-phytoene synthase [EC:2.5.1.32] | (RefSeq) phytoene synthase 2, chloroplastic-like (A)	ko00906: Carotenoid biosynthesis; ko01100: Metabolic pathways; ko01110: Biosynthesis of secondary metabolites
TraesCS5B02G017300	2.49513	0.001134	0.00497757	up	K12828 splicing factor 3B subunit 1 | (RefSeq) splicing factor 3B subunit 1-like (A)	ko03040: Spliceosome
TraesCS5B02G016000	-1.60175	1.59759e-06	1.53586e-05	down	K13513 lysocardiolipin and lysophospholipid acyltransferase [EC:2.3.1.- 2.3.1.51] | (RefSeq) probable 1-acyl-sn-glycerol-3-phosphate acyltransferase 4 isoform X1 (A)	ko00561: Glycerolipid metabolism; ko00564: Glycerophospholipid metabolism; ko01100: Metabolic pathways; ko01110: Biosynthesis of secondary metabolites
TraesCS5B02G015700	-1.64321	1.68071e-05	0.000125788	down	K13513 lysocardiolipin and lysophospholipid acyltransferase [EC:2.3.1.- 2.3.1.51] | (RefSeq) probable 1-acyl-sn-glycerol-3-phosphate acyltransferase 4 isoform X1 (A)	ko00561: Glycerolipid metabolism; ko00564: Glycerophospholipid metabolism; ko01100: Metabolic pathways; ko01110: Biosynthesis of secondary metabolites
TraesCS5B02G007600	1.21268	6.50009e-10	1.20391e-08	up	K10666 E3 ubiquitin-protein ligase RNF5 [EC:2.3.2.27] | (RefSeq) E3 ubiquitin-protein ligase RNF5-like (A)	ko04141: Protein processing in endoplasmic reticulum
TraesCS5B02G007100	-1.31124	0.0140897	0.0408553	down	K13225 3-hydroxyindolin-2-one monooxygenase [EC:1.14.14.109] | (RefSeq) 3-hydroxyindolin-2-one monooxygenase-like (A)	ko00402: Benzoxazinoid biosynthesis; ko01110: Biosynthesis of secondary metabolites
TraesCS5A02G557100	1.42894	0.00844712	0.0268821	up	K13229 2,4-dihydroxy-1,4-benzoxazin-3-one-glucoside dioxygenase [EC:1.14.11.59] | (RefSeq) DIBOA-glucoside dioxygenase BX6 (A)	ko00402: Benzoxazinoid biosynthesis; ko01110: Biosynthesis of secondary metabolites
TraesCS5A02G554200	-5.23044	8.5858e-28	1.10664e-25	down	K01177 beta-amylase [EC:3.2.1.2] | (RefSeq) beta-amylase (A)	ko00500: Starch and sucrose metabolism; ko01100: Metabolic pathways; ko01110: Biosynthesis of secondary metabolites
TraesCS5A02G548000	-3.77306	2.36 × 10-47	1.24 × 10-44	down	K13448 calcium-binding protein CML | (RefSeq) probable calcium-binding protein CML50 (A)	ko04626: Plant-pathogen interaction
TraesCS5A02G547500	-2.0293	2.96808e-07	3.36433e-06	down	K14513 ethylene-insensitive protein 2 | (RefSeq) protein ETHYLENE-INSENSITIVE 2-like isoform X1 (A)	ko04016: MAPK signaling pathway - plant; ko04075: Plant hormone signal transduction
TraesCS5A02G544900	1.22388	0.000301016	0.00158904	up	K10848 DNA excision repair protein ERCC-4 [EC:3.1.-.-] | (RefSeq) DNA repair endonuclease UVH1-like (A)	ko03420: Nucleotide excision repair
TraesCS5A02G544800	1.0669	0.000621484	0.00298359	up	K10848 DNA excision repair protein ERCC-4 [EC:3.1.-.-] | (RefSeq) hypothetical protein (A)	ko03420: Nucleotide excision repair
TraesCS5A02G543300	1.71429	0.00040796	0.00207451	up	K01535 H+-transporting ATPase [EC:7.1.2.1] | (RefSeq) plasma membrane ATPase 1-like isoform X1 (A)	ko00190: Oxidative phosphorylation; ko01100: Metabolic pathways
TraesCS5A02G540900	2.92563	9.82242e-09	1.47792e-07	up	K01613 phosphatidylserine decarboxylase [EC:4.1.1.65] | (RefSeq) phosphatidylserine decarboxylase proenzyme 1, mitochondrial-like isoform X1 (A)	ko00564: Glycerophospholipid metabolism; ko01100: Metabolic pathways; ko01110: Biosynthesis of secondary metabolites
TraesCS5A02G533800	1.15957	0.0142016	0.041104	up	K02988 small subunit ribosomal protein S5 | (RefSeq) uncharacterized protein LOC119334005 (A)	ko03010: Ribosome
TraesCS5A02G526000	-5.39404	2.48 × 10-61	2.95 × 10-58	down	K00729 dolichyl-phosphate beta-glucosyltransferase [EC:2.4.1.117] | (RefSeq) dolichyl-phosphate beta-glucosyltransferase (A)	ko00510: N-Glycan biosynthesis; ko01100: Metabolic pathways
TraesCS5A02G524900	-1.16525	0.000539775	0.00264401	down	K03036 26S proteasome regulatory subunit N6 | (RefSeq) 26S proteasome non-ATPase regulatory subunit 11 homolog (A)	ko03050: Proteasome
TraesCS5A02G516300	-4.45316	2.49119e-05	0.000177909	down	K00430 peroxidase [EC:1.11.1.7] | (RefSeq) peroxidase 5-like (A)	ko00940: Phenylpropanoid biosynthesis; ko01100: Metabolic pathways; ko01110: Biosynthesis of secondary metabolites
TraesCS5A02G515900	2.33512	1.90181e-14	6.85961e-13	up	K08269 serine/threonine-protein kinase ULK2 [EC:2.7.11.1] | (RefSeq) serine/threonine-protein kinase ATG1a isoform X1 (A)	ko04136: Autophagy - other
TraesCS5A02G510900	-2.44907	2.10132e-11	4.98225e-10	down	K15402 fatty acid omega-hydroxylase [EC:1.14.-.-] | (RefSeq) cytochrome P450 86B1-like (A)	ko00073: Cutin, suberine and wax biosynthesis
TraesCS5A02G510200	-1.4247	3.23654e-05	0.000224167	down	K00559 sterol 24-C-methyltransferase [EC:2.1.1.41] | (RefSeq) cycloartenol-C-24-methyltransferase 1-like (A)	ko00100: Steroid biosynthesis; ko01100: Metabolic pathways; ko01110: Biosynthesis of secondary metabolites
TraesCS5A02G503300	-3.99442	1.9433e-06	1.83038e-05	down	K13422 transcription factor MYC2 | (RefSeq) transcription factor MYC2 (A)	ko04016: MAPK signaling pathway - plant; ko04075: Plant hormone signal transduction
TraesCS5A02G503100	-2.2278	0.00418753	0.0150198	down	K11094 U2 small nuclear ribonucleoprotein B'' | (RefSeq) U2 small nuclear ribonucleoprotein B''-like isoform X1 (A)	ko03040: Spliceosome
TraesCS5A02G501800	1.54154	3.97283e-09	6.45168e-08	up	K00640 serine O-acetyltransferase [EC:2.3.1.30] | (RefSeq) probable serine acetyltransferase 2 (A)	ko00270: Cysteine and methionine metabolism; ko00920: Sulfur metabolism; ko01100: Metabolic pathways; ko01110: Biosynthesis of secondary metabolites; ko01200: Carbon metabolism; ko01230: Biosynthesis of amino acids
TraesCS5A02G500000	1.73471	7.28481e-05	0.000458321	up	K14500 BR-signaling kinase [EC:2.7.11.1] | (RefSeq) serine/threonine-protein kinase BSK1-2-like (A)	ko04075: Plant hormone signal transduction
TraesCS5A02G499900	2.5182	4.57424e-11	1.02762e-09	up	K13447 respiratory burst oxidase [EC:1.6.3.- 1.11.1.-] | (RefSeq) respiratory burst oxidase homolog protein B-like isoform X1 (A)	ko04016: MAPK signaling pathway - plant; ko04626: Plant-pathogen interaction
TraesCS5A02G496000	-3.86475	3.76891e-07	4.15861e-06	down	K00059 3-oxoacyl-[acyl-carrier protein] reductase [EC:1.1.1.100] | (RefSeq) NADPH-dependent aldehyde reductase-like protein, chloroplastic (A)	ko00061: Fatty acid biosynthesis; ko00780: Biotin metabolism; ko01100: Metabolic pathways; ko01110: Biosynthesis of secondary metabolites; ko01212: Fatty acid metabolism; ko01240: Biosynthesis of cofactors
TraesCS5A02G495100	1.88766	0.00791332	0.0254965	up	K05298 glyceraldehyde-3-phosphate dehydrogenase (NADP+) (phosphorylating) [EC:1.2.1.13] | (RefSeq) glyceraldehyde-3-phosphate dehydrogenase B, chloroplastic-like (A)	ko00710: Carbon fixation in photosynthetic organisms; ko01100: Metabolic pathways; ko01200: Carbon metabolism
TraesCS5A02G494200	-1.8724	0.000298107	0.00157598	down	K15746 beta-carotene 3-hydroxylase [EC:1.14.15.24] | (RefSeq) beta-carotene 3-hydroxylase, chloroplastic-like (A)	ko00906: Carotenoid biosynthesis; ko01100: Metabolic pathways; ko01110: Biosynthesis of secondary metabolites
TraesCS5A02G493100	-1.34221	0.000461323	0.00230791	down	K04506 E3 ubiquitin-protein ligase SIAH1 [EC:2.3.2.27] | (RefSeq) E3 ubiquitin-protein ligase SINA-like 7 (A)	ko04120: Ubiquitin mediated proteolysis
TraesCS5A02G491600	-4.32477	9.35083e-10	1.67957e-08	down	K20557 transcription factor VIP1 | (RefSeq) transcription factor VIP1-like (A)	ko04016: MAPK signaling pathway - plant
TraesCS5A02G490100	1.85485	0.00676998	0.0224424	up	K14677 aminoacylase [EC:3.5.1.14] | (RefSeq) uncharacterized protein LOC104719897 (A)	ko00220: Arginine biosynthesis; ko01100: Metabolic pathways; ko01110: Biosynthesis of secondary metabolites; ko01210: 2-Oxocarboxylic acid metabolism; ko01230: Biosynthesis of amino acids
TraesCS5A02G488500	-1.67656	0.000109436	0.00065434	down	K09291 nucleoprotein TPR | (RefSeq) LOW QUALITY PROTEIN: nuclear-pore anchor (A)	ko03013: Nucleocytoplasmic transport
TraesCS5A02G485600	-1.07057	8.65921e-06	6.99563e-05	down	K14004 protein transport protein SEC13 | (RefSeq) protein transport protein SEC13 homolog B-like (A)	ko03013: Nucleocytoplasmic transport; ko04141: Protein processing in endoplasmic reticulum
TraesCS5A02G483500	1.57686	3.52909e-08	4.78507e-07	up	K01191 alpha-mannosidase [EC:3.2.1.24] | (RefSeq) alpha-mannosidase At3g26720-like (A)	ko00511: Other glycan degradation
TraesCS5A02G483400	-1.67717	0.01184	0.0354704	down	K01191 alpha-mannosidase [EC:3.2.1.24] | (RefSeq) alpha-mannosidase At3g26720-like (A)	ko00511: Other glycan degradation
TraesCS5A02G482400	-1.00668	7.14025e-06	5.90221e-05	down	K09562 hsp70-interacting protein | (RefSeq) hsp70-binding protein 1-like isoform X1 (A)	ko04141: Protein processing in endoplasmic reticulum
TraesCS5A02G481300	-1.20324	0.00121	0.00526073	down	K14494 DELLA protein | (RefSeq) DELLA protein GAI-like (A)	ko04075: Plant hormone signal transduction
TraesCS5A02G475300	-2.09575	0.000955161	0.00430825	down	K14411 RNA-binding protein Musashi | (RefSeq) uncharacterized protein LOC119276992 (A)	ko03015: mRNA surveillance pathway
TraesCS5A02G474300	1.42735	1.74916e-07	2.07042e-06	up	K01254 leukotriene-A4 hydrolase [EC:3.3.2.6] | (RefSeq) leucine aminopeptidase (A)	ko00590: Arachidonic acid metabolism; ko01100: Metabolic pathways
TraesCS5A02G472800	1.89324	0.00307996	0.0116052	up	K13513 lysocardiolipin and lysophospholipid acyltransferase [EC:2.3.1.- 2.3.1.51] | (RefSeq) probable 1-acyl-sn-glycerol-3-phosphate acyltransferase 4 isoform X1 (A)	ko00561: Glycerolipid metabolism; ko00564: Glycerophospholipid metabolism; ko01100: Metabolic pathways; ko01110: Biosynthesis of secondary metabolites
TraesCS5A02G472300	1.92535	1.24292e-08	1.83151e-07	up	K13224 indolin-2-one monooxygenase [EC:1.14.14.157] | (RefSeq) indolin-2-one monooxygenase-like (A)	ko00402: Benzoxazinoid biosynthesis; ko01110: Biosynthesis of secondary metabolites
TraesCS5A02G472100	1.48919	0.000150091	0.000863692	up	K01595 phosphoenolpyruvate carboxylase [EC:4.1.1.31] | (RefSeq) uncharacterized protein LOC103701209 (A)	ko00620: Pyruvate metabolism; ko00710: Carbon fixation in photosynthetic organisms; ko01100: Metabolic pathways; ko01200: Carbon metabolism
TraesCS5A02G468800	1.04168	2.40942e-05	0.000172831	up	K13434 pathogenesis-related genes transcriptional activator PTI6 | (RefSeq) pathogenesis-related genes transcriptional activator PTI6-like (A)	ko04626: Plant-pathogen interaction
TraesCS5A02G468400	-1.64586	6.97909e-11	1.51445e-09	down	K00297 methylenetetrahydrofolate reductase (NADH) [EC:1.5.1.54] | (RefSeq) probable methylenetetrahydrofolate reductase (A)	ko00670: One carbon pool by folate; ko01100: Metabolic pathways; ko01200: Carbon metabolism
TraesCS5A02G465200	1.37348	0.0070135	0.0231133	up	K14674 TAG lipase / steryl ester hydrolase / phospholipase A2 / LPA acyltransferase [EC:3.1.1.3 3.1.1.13 3.1.1.4 2.3.1.51] | (RefSeq) triacylglycerol lipase SDP1-like (A)	ko00100: Steroid biosynthesis; ko00561: Glycerolipid metabolism; ko00564: Glycerophospholipid metabolism; ko00565: Ether lipid metabolism; ko00590: Arachidonic acid metabolism; ko00591: Linoleic acid metabolism; ko00592: alpha-Linolenic acid metabolism; ko01100: Metabolic pathways; ko01110: Biosynthesis of secondary metabolites
TraesCS5A02G445900	1.55299	0.000127265	0.00074667	up	K01728 pectate lyase [EC:4.2.2.2] | (RefSeq) probable pectate lyase 3 isoform X1 (A)	ko00040: Pentose and glucuronate interconversions; ko01100: Metabolic pathways
TraesCS5A02G445200	1.14633	0.000118508	0.000701291	up	K03283 heat shock 70kDa protein 1/2/6/8 | (GenBank) DnaK family protein (A)	ko03040: Spliceosome; ko04141: Protein processing in endoplasmic reticulum; ko04144: Endocytosis
TraesCS5A02G443500	-3.04441	0.000352451	0.00182733	down	K07375 tubulin beta | (RefSeq) tubulin beta-6 chain-like isoform X1 (A)	ko04145: Phagosome
TraesCS5A02G439300	-1.04336	0.000761307	0.0035556	down	K14553 U3 small nucleolar RNA-associated protein 18 | (RefSeq) U3 small nucleolar RNA-associated protein 18 homolog (A)	ko03008: Ribosome biogenesis in eukaryotes
TraesCS5A02G429100	1.15883	0.0102505	0.0314825	up	K00850 6-phosphofructokinase 1 [EC:2.7.1.11] | (RefSeq) ATP-dependent 6-phosphofructokinase 6-like (A)	ko00010: Glycolysis / Gluconeogenesis; ko00030: Pentose phosphate pathway; ko00051: Fructose and mannose metabolism; ko00052: Galactose metabolism; ko01100: Metabolic pathways; ko01110: Biosynthesis of secondary metabolites; ko01200: Carbon metabolism; ko01230: Biosynthesis of amino acids; ko03018: RNA degradation
TraesCS5A02G428900	3.24409	1.17661e-07	1.43397e-06	up	K13435 serine/threonine-protein kinase Pto | (RefSeq) Pto; serine/threonine protein kinase Pto (A)	ko04626: Plant-pathogen interaction
TraesCS5A02G427600	2.61927	1.09089e-06	1.09049e-05	up	K11817 indole-3-acetaldehyde oxidase [EC:1.2.3.7] | (RefSeq) indole-3-acetaldehyde oxidase-like (A)	ko00380: Tryptophan metabolism; ko01100: Metabolic pathways
TraesCS5A02G427400	1.47812	1.64269e-09	2.83733e-08	up	K14493 gibberellin receptor GID1 [EC:3.-.-.-] | (RefSeq) GID1b-1; hypothetical protein (A)	ko04075: Plant hormone signal transduction
TraesCS5A02G427000	1.41497	0.0161213	0.0455922	up	K20725 MAP kinase substrate 1 | (RefSeq) protein MKS1-like (A)	ko04016: MAPK signaling pathway - plant
TraesCS5A02G426100	-2.47577	2.45 × 10-48	1.35 × 10-45	down	K09503 DnaJ homolog subfamily A member 2 | (RefSeq) dnaJ protein homolog (A)	ko04141: Protein processing in endoplasmic reticulum
TraesCS5A02G424900	1.33648	0.000153878	0.000882861	up	K10569 endonuclease VIII-like 3 | (RefSeq) hypothetical protein (A)	ko03410: Base excision repair
TraesCS5A02G424000	-5.80343	7.41097e-14	2.47294e-12	down	K00799 glutathione S-transferase [EC:2.5.1.18] | (RefSeq) probable glutathione S-transferase GSTU1 (A)	ko00480: Glutathione metabolism; ko01100: Metabolic pathways
TraesCS5A02G416400	-1.34485	7.61284e-05	0.000476437	down	K07375 tubulin beta | (RefSeq) tubulin beta-4 chain-like (A)	ko04145: Phagosome
TraesCS5A02G415400	-1.0243	6.61156e-06	5.51203e-05	down	K03231 elongation factor 1-alpha | (RefSeq) elongation factor 1-alpha-like isoform X1 (A)	ko03013: Nucleocytoplasmic transport
TraesCS5A02G413500	-2.06321	0.00216724	0.00861645	down	K13457 disease resistance protein RPM1 | (RefSeq) disease resistance protein RPM1-like (A)	ko04626: Plant-pathogen interaction
TraesCS5A02G412500	-2.22713	2.103e-07	2.45022e-06	down	K03885 NADH:quinone reductase (non-electrogenic) [EC:1.6.5.9] | (RefSeq) external alternative NAD(P)H-ubiquinone oxidoreductase B1, mitochondrial-like (A)	ko00190: Oxidative phosphorylation; ko01100: Metabolic pathways
TraesCS5A02G412100	-1.06964	0.00756193	0.024588	down	K03860 phosphatidylinositol N-acetylglucosaminyltransferase subunit Q | (RefSeq) uncharacterized protein LOC123123013 isoform X1 (A)	ko00563: Glycosylphosphatidylinositol (GPI)-anchor biosynthesis; ko01100: Metabolic pathways
TraesCS5A02G411000	1.49296	8.83255e-06	7.11954e-05	up	K09648 mitochondrial inner membrane protease subunit 2 [EC:3.4.21.-] | (RefSeq) mitochondrial inner membrane protease subunit 2-like (A)	ko03060: Protein export
TraesCS5A02G408400	-2.075	1.41455e-05	0.000108107	down	K01081 5'-nucleotidase [EC:3.1.3.5] | (RefSeq) 5' nucleotidase family protein (A)	ko00230: Purine metabolism; ko00240: Pyrimidine metabolism; ko00760: Nicotinate and nicotinamide metabolism; ko01100: Metabolic pathways; ko01110: Biosynthesis of secondary metabolites; ko01232: Nucleotide metabolism
TraesCS5A02G407800	-2.27267	5.73864e-10	1.07517e-08	down	K07374 tubulin alpha | (RefSeq) tubulin alpha-2 chain-like (A)	ko04145: Phagosome
TraesCS5A02G407300	1.49289	2.4184e-05	0.000173362	up	K13415 protein brassinosteroid insensitive 1 [EC:2.7.10.1 2.7.11.1] | (RefSeq) protein BRASSINOSTEROID INSENSITIVE 1-like (A)	ko04075: Plant hormone signal transduction
TraesCS5A02G407200	1.64431	0.00774477	0.0250449	up	K13258 2-hydroxyisoflavanone dehydratase [EC:4.2.1.105] | (RefSeq) 2-hydroxyisoflavanone dehydratase-like (A)	ko00943: Isoflavonoid biosynthesis; ko01100: Metabolic pathways; ko01110: Biosynthesis of secondary metabolites
TraesCS5A02G403700	-2.00658	1.04058e-09	1.85295e-08	down	K12189 ESCRT-II complex subunit VPS25 | (RefSeq) vacuolar protein sorting-associated protein 25-like isoform X3 (A)	ko04144: Endocytosis
TraesCS5A02G403600	-1.12639	0.0145154	0.0418493	down	K12189 ESCRT-II complex subunit VPS25 | (RefSeq) vacuolar protein sorting-associated protein 25-like isoform X3 (A)	ko04144: Endocytosis
TraesCS5A02G403200	-2.02182	5.59024e-05	0.000362954	down	K01723 hydroperoxide dehydratase [EC:4.2.1.92] | (RefSeq) allene oxide synthase 1, chloroplastic-like (A)	ko00592: alpha-Linolenic acid metabolism; ko01100: Metabolic pathways; ko01110: Biosynthesis of secondary metabolites
TraesCS5A02G402500	-1.24214	0.00227183	0.00897027	down	K15631 molybdenum cofactor sulfurtransferase [EC:2.8.1.9] | (RefSeq) molybdenum cofactor sulfurase-like (A)	ko00790: Folate biosynthesis; ko01100: Metabolic pathways
TraesCS5A02G402200	2.49125	0.00012808	0.000751044	up	K14307 nucleoporin p58/p45 | (RefSeq) nuclear pore complex protein NUP58-like (A)	ko03013: Nucleocytoplasmic transport
TraesCS5A02G401600	-1.29329	0.010492	0.0320969	down	K14491 two-component response regulator ARR-B family | (RefSeq) two-component response regulator EHD1-like (A)	ko04075: Plant hormone signal transduction
TraesCS5A02G400800	-2.79537	0.0109886	0.0333511	down	K14400 pre-mRNA cleavage complex 2 protein Pcf11 | (RefSeq) LOW QUALITY PROTEIN: uncharacterized protein LOC109844760 (A)	ko03015: mRNA surveillance pathway
TraesCS5A02G400000	1.27022	0.00977655	0.0302759	up	K00472 prolyl 4-hydroxylase [EC:1.14.11.2] | (RefSeq) probable prolyl 4-hydroxylase 9 (A)	ko00330: Arginine and proline metabolism; ko01100: Metabolic pathways
TraesCS5A02G398300	1.2027	0.0013561	0.00579239	up	K00133 aspartate-semialdehyde dehydrogenase [EC:1.2.1.11] | (RefSeq) aspartate-semialdehyde dehydrogenase-like (A)	ko00260: Glycine, serine and threonine metabolism; ko00261: Monobactam biosynthesis; ko00270: Cysteine and methionine metabolism; ko00300: Lysine biosynthesis; ko01100: Metabolic pathways; ko01110: Biosynthesis of secondary metabolites; ko01210: 2-Oxocarboxylic acid metabolism; ko01230: Biosynthesis of amino acids
TraesCS5A02G397900	1.45577	0.000272609	0.00145615	up	K13260 isoflavone/4'-methoxyisoflavone 2'-hydroxylase [EC:1.14.14.90 1.14.14.89] | (RefSeq) cytochrome P450 81E8-like (A)	ko00943: Isoflavonoid biosynthesis; ko01100: Metabolic pathways; ko01110: Biosynthesis of secondary metabolites
TraesCS5A02G397800	2.28622	7.66179e-06	6.27321e-05	up	K13260 isoflavone/4'-methoxyisoflavone 2'-hydroxylase [EC:1.14.14.90 1.14.14.89] | (RefSeq) cytochrome P450 81Q32-like (A)	ko00943: Isoflavonoid biosynthesis; ko01100: Metabolic pathways; ko01110: Biosynthesis of secondary metabolites
TraesCS5A02G395300	-1.37269	0.000151839	0.000872759	down	K05391 cyclic nucleotide gated channel, plant | (RefSeq) cyclic nucleotide-gated ion channel 2-like isoform X1 (A)	ko04626: Plant-pathogen interaction
TraesCS5A02G394900	-5.36001	4.76603e-18	2.56991e-16	down	K00012 UDPglucose 6-dehydrogenase [EC:1.1.1.22] | (RefSeq) UDP-glucose 6-dehydrogenase 4-like (A)	ko00040: Pentose and glucuronate interconversions; ko00053: Ascorbate and aldarate metabolism; ko00520: Amino sugar and nucleotide sugar metabolism; ko01100: Metabolic pathways; ko01240: Biosynthesis of cofactors; ko01250: Biosynthesis of nucleotide sugars
TraesCS5A02G393200	-4.61633	5.63247e-07	5.98492e-06	down	K19891 glucan endo-1,3-beta-glucosidase 1/2/3 [EC:3.2.1.39] | (RefSeq) glucan endo-1,3-beta-glucosidase 3-like (A)	ko00500: Starch and sucrose metabolism; ko01100: Metabolic pathways
TraesCS5A02G391300	-1.48527	2.51263e-09	4.21583e-08	down	K12121 phytochrome B | (RefSeq) phytochrome 1-like isoform X1 (A)	ko04712: Circadian rhythm - plant
TraesCS5A02G389000	2.24099	3.78721e-07	4.17342e-06	up	K01188 beta-glucosidase [EC:3.2.1.21] | (RefSeq) beta-glucosidase BoGH3B-like isoform X1 (A)	ko00460: Cyanoamino acid metabolism; ko00500: Starch and sucrose metabolism; ko00999: Biosynthesis of various plant secondary metabolites; ko01100: Metabolic pathways; ko01110: Biosynthesis of secondary metabolites
TraesCS5A02G387500	1.11619	3.69531e-09	6.03917e-08	up	K15397 3-ketoacyl-CoA synthase [EC:2.3.1.199] | (RefSeq) 3-ketoacyl-CoA synthase 19-like (A)	ko00062: Fatty acid elongation; ko01100: Metabolic pathways; ko01110: Biosynthesis of secondary metabolites; ko04626: Plant-pathogen interaction
TraesCS5A02G383900	-4.39603	1.28105e-05	9.91512e-05	down	K23260 scopoletin glucosyltransferase [EC:2.4.1.128] | (RefSeq) scopoletin glucosyltransferase-like (A)	ko00999: Biosynthesis of various plant secondary metabolites; ko01110: Biosynthesis of secondary metabolites
TraesCS5A02G382800	2.32331	0.000735331	0.00344934	up	K02183 calmodulin | (RefSeq) calmodulin-like protein 4 (A)	ko04016: MAPK signaling pathway - plant; ko04070: Phosphatidylinositol signaling system; ko04626: Plant-pathogen interaction
TraesCS5A02G381000	-1.43893	0.00403942	0.0145884	down	K13425 WRKY transcription factor 22 | (RefSeq) WRKY transcription factor 22 (A)	ko04016: MAPK signaling pathway - plant; ko04626: Plant-pathogen interaction
TraesCS5A02G380800	1.02659	0.00299941	0.011348	up	K10886 DNA-repair protein XRCC4 | (RefSeq) DNA repair protein XRCC4-like (A)	ko03450: Non-homologous end-joining
TraesCS5A02G380700	1.29564	0.0138928	0.0403785	up	K13475 R protein MLA10 | (RefSeq) disease resistance protein RGA5-like isoform X1 (A)	ko04626: Plant-pathogen interaction
TraesCS5A02G378200	-3.09762	3.78652e-08	5.10436e-07	down	K14484 auxin-responsive protein IAA | (RefSeq) auxin-responsive protein IAA12-like (A)	ko04075: Plant hormone signal transduction
TraesCS5A02G376700	2.0341	3.33124e-07	3.73247e-06	up	K01968 3-methylcrotonyl-CoA carboxylase alpha subunit [EC:6.4.1.4] | (RefSeq) methylcrotonoyl-CoA carboxylase subunit alpha, mitochondrial (A)	ko00280: Valine, leucine and isoleucine degradation; ko01100: Metabolic pathways
TraesCS5A02G375000	1.18752	2.55053e-09	4.27271e-08	up	K00819 ornithine--oxo-acid transaminase [EC:2.6.1.13] | (RefSeq) ornithine aminotransferase, mitochondrial-like (A)	ko00330: Arginine and proline metabolism; ko01100: Metabolic pathways; ko01110: Biosynthesis of secondary metabolites
TraesCS5A02G370000	1.0386	0.000655403	0.00312372	up	K14570 RNA exonuclease [EC:3.1.-.-] | (RefSeq) predicted protein (A)	ko03008: Ribosome biogenesis in eukaryotes
TraesCS5A02G367800	1.33776	4.64934e-05	0.00030882	up	K05284 GPI mannosyltransferase 1 subunit M [EC:2.4.1.-] | (RefSeq) GPI mannosyltransferase 1-like (A)	ko00563: Glycosylphosphatidylinositol (GPI)-anchor biosynthesis; ko01100: Metabolic pathways
TraesCS5A02G365000	4.15252	0.000449036	0.00225276	up	K19891 glucan endo-1,3-beta-glucosidase 1/2/3 [EC:3.2.1.39] | (RefSeq) hypothetical protein (A)	ko00500: Starch and sucrose metabolism; ko01100: Metabolic pathways
TraesCS5A02G360200	1.32762	0.000798299	0.00370612	up	K05391 cyclic nucleotide gated channel, plant | (RefSeq) cyclic nucleotide-gated ion channel 17-like (A)	ko04626: Plant-pathogen interaction
TraesCS5A02G358600	-1.03811	0.0119637	0.0357808	down	K14403 cleavage and polyadenylation specificity factor subunit 3 [EC:3.1.27.-] | (RefSeq) cleavage and polyadenylation specificity factor subunit 3-I-like (A)	ko03015: mRNA surveillance pathway
TraesCS5A02G358000	-1.16991	0.00125221	0.00540689	down	K14152 phosphoribosyl-ATP pyrophosphohydrolase / phosphoribosyl-AMP cyclohydrolase / histidinol dehydrogenase [EC:3.6.1.31 3.5.4.19 1.1.1.23] | (RefSeq) uncharacterized protein LOC111783531 (A)	ko00340: Histidine metabolism; ko01100: Metabolic pathways; ko01110: Biosynthesis of secondary metabolites; ko01230: Biosynthesis of amino acids
TraesCS5A02G356400	1.18328	0.000599085	0.00289137	up	K12183 ESCRT-I complex subunit TSG101 | (RefSeq) protein ELC-like (A)	ko03250: Viral life cycle - HIV-1; ko04144: Endocytosis
TraesCS5A02G346800	-1.69296	0.00175896	0.00721912	down	K19476 vacuolar protein sorting-associated protein IST1 | (RefSeq) vacuolar protein sorting-associated protein IST1-like (A)	ko04144: Endocytosis
TraesCS5A02G337400	-3.06348	3.58123e-10	6.93806e-09	down	K01581 ornithine decarboxylase [EC:4.1.1.17] | (RefSeq) ornithine decarboxylase (A)	ko00330: Arginine and proline metabolism; ko00480: Glutathione metabolism; ko01100: Metabolic pathways; ko01110: Biosynthesis of secondary metabolites
TraesCS5A02G331500	-1.35582	9.22889e-09	1.39766e-07	down	K03955 NADH dehydrogenase (ubiquinone) 1 alpha/beta subcomplex 1, acyl-carrier protein | (RefSeq) acyl carrier protein 2, mitochondrial (A)	ko00190: Oxidative phosphorylation; ko01100: Metabolic pathways
TraesCS5A02G328200	-1.07071	0.00239773	0.00940076	down	K00276 primary-amine oxidase [EC:1.4.3.21] | (RefSeq) hypothetical protein (A)	ko00260: Glycine, serine and threonine metabolism; ko00350: Tyrosine metabolism; ko00360: Phenylalanine metabolism; ko00410: beta-Alanine metabolism; ko00950: Isoquinoline alkaloid biosynthesis; ko00960: Tropane, piperidine and pyridine alkaloid biosynthesis; ko01100: Metabolic pathways; ko01110: Biosynthesis of secondary metabolites
TraesCS5A02G326100	2.08771	4.28882e-12	1.11635e-10	up	K01373 cathepsin F [EC:3.4.22.41] | (RefSeq) cysteine proteinase 1-like (A)	ko04626: Plant-pathogen interaction
TraesCS5A02G324200	-1.99497	6.09866e-12	1.5601e-10	down	K01803 triosephosphate isomerase (TIM) [EC:5.3.1.1] | (RefSeq) triosephosphate isomerase, chloroplastic (A)	ko00010: Glycolysis / Gluconeogenesis; ko00051: Fructose and mannose metabolism; ko00562: Inositol phosphate metabolism; ko00710: Carbon fixation in photosynthetic organisms; ko01100: Metabolic pathways; ko01110: Biosynthesis of secondary metabolites; ko01200: Carbon metabolism; ko01230: Biosynthesis of amino acids
TraesCS5A02G321900	-2.2945	0.000172059	0.00097432	down	K15406 wax-ester synthase / diacylglycerol O-acyltransferase [EC:2.3.1.75 2.3.1.20] | (RefSeq) O-acyltransferase WSD1-like (A)	ko00073: Cutin, suberine and wax biosynthesis
TraesCS5A02G319300	-2.69882	3.14726e-13	9.62532e-12	down	K01183 chitinase [EC:3.2.1.14] | (RefSeq) xylanase inhibitor protein 1-like (A)	ko00520: Amino sugar and nucleotide sugar metabolism; ko01100: Metabolic pathways
TraesCS5A02G314800	-1.21266	8.66557e-06	6.99972e-05	down	K01784 UDP-glucose 4-epimerase [EC:5.1.3.2] | (RefSeq) UDP-glucose 4-epimerase 3-like (A)	ko00052: Galactose metabolism; ko00520: Amino sugar and nucleotide sugar metabolism; ko01100: Metabolic pathways; ko01250: Biosynthesis of nucleotide sugars
TraesCS5A02G306700	8.81539	5.2391e-11	1.16621e-09	up	K13422 transcription factor MYC2 | (RefSeq) transcription factor MYC2 (A)	ko04016: MAPK signaling pathway - plant; ko04075: Plant hormone signal transduction
TraesCS5A02G305400	-1.22717	1.69398e-05	0.00012664	down	K01765 inositol-1,3,4-trisphosphate 5/6-kinase [EC:2.7.1.159] | (RefSeq) inositol-tetrakisphosphate 1-kinase 6-like (A)	ko00562: Inositol phosphate metabolism; ko01100: Metabolic pathways
TraesCS5A02G305300	-2.53803	3.7832e-05	0.000257624	down	K01765 inositol-1,3,4-trisphosphate 5/6-kinase [EC:2.7.1.159] | (RefSeq) inositol-tetrakisphosphate 1-kinase 6-like (A)	ko00562: Inositol phosphate metabolism; ko01100: Metabolic pathways
TraesCS5A02G300300	1.14117	0.00833206	0.0265999	up	K09648 mitochondrial inner membrane protease subunit 2 [EC:3.4.21.-] | (RefSeq) mitochondrial inner membrane protease subunit 2-like (A)	ko03060: Protein export
TraesCS5A02G298800	1.32035	1.19067e-08	1.76083e-07	up	K05955 protein farnesyltransferase/geranylgeranyltransferase type-1 subunit alpha [EC:2.5.1.58 2.5.1.59] | (RefSeq) protein farnesyltransferase/geranylgeranyltransferase type-1 subunit alpha-like (A)	ko00900: Terpenoid backbone biosynthesis; ko01110: Biosynthesis of secondary metabolites
TraesCS5A02G297900	-1.62046	0.00063269	0.00302896	down	K13436 pto-interacting protein 1 [EC:2.7.11.1] | (RefSeq) PTI1-like tyrosine-protein kinase 3 (A)	ko04626: Plant-pathogen interaction
TraesCS5A02G295200	-1.37311	1.54197e-06	1.48827e-05	down	K01188 beta-glucosidase [EC:3.2.1.21] | (RefSeq) beta-glucosidase 31-like (A)	ko00460: Cyanoamino acid metabolism; ko00500: Starch and sucrose metabolism; ko00999: Biosynthesis of various plant secondary metabolites; ko01100: Metabolic pathways; ko01110: Biosynthesis of secondary metabolites
TraesCS5A02G295100	-1.03107	7.60875e-06	6.24017e-05	down	K01188 beta-glucosidase [EC:3.2.1.21] | (RefSeq) beta-glucosidase 31-like (A)	ko00460: Cyanoamino acid metabolism; ko00500: Starch and sucrose metabolism; ko00999: Biosynthesis of various plant secondary metabolites; ko01100: Metabolic pathways; ko01110: Biosynthesis of secondary metabolites
TraesCS5A02G291300	-1.19379	1.50391e-07	1.79724e-06	down	K12448 UDP-arabinose 4-epimerase [EC:5.1.3.5] | (RefSeq) probable UDP-arabinose 4-epimerase 1 (A)	ko00520: Amino sugar and nucleotide sugar metabolism; ko01100: Metabolic pathways; ko01250: Biosynthesis of nucleotide sugars
TraesCS5A02G288200	1.08559	0.00887511	0.0279845	up	K00430 peroxidase [EC:1.11.1.7] | (RefSeq) peroxidase 55-like (A)	ko00940: Phenylpropanoid biosynthesis; ko01100: Metabolic pathways; ko01110: Biosynthesis of secondary metabolites
TraesCS5A02G286700	-3.7371	3.12087e-06	2.79624e-05	down	K13415 protein brassinosteroid insensitive 1 [EC:2.7.10.1 2.7.11.1] | (RefSeq) uncharacterized protein LOC103413440 isoform X1 (A)	ko04075: Plant hormone signal transduction
TraesCS5A02G284800	-1.97839	7.01402e-07	7.29922e-06	down	K07375 tubulin beta | (RefSeq) uncharacterized protein LOC123070672 isoform X1 (A)	ko04145: Phagosome
TraesCS5A02G283100	-5.02794	1.83595e-14	6.63546e-13	down	K05658 ATP-binding cassette, subfamily B (MDR/TAP), member 1 [EC:7.6.2.2] | (RefSeq) uncharacterized protein LOC111781709 (A)	ko02010: ABC transporters
TraesCS5A02G279200	1.30317	1.04871e-08	1.56604e-07	up	K18878 BHLH transcription factor Upa20 | (RefSeq) Upa20; transcription factor bHLH137-like (A)	ko04626: Plant-pathogen interaction
TraesCS5A02G276300	1.18242	2.48339e-05	0.000177423	up	K00306 sarcosine oxidase / L-pipecolate oxidase [EC:1.5.3.1 1.5.3.7] | (RefSeq) probable sarcosine oxidase (A)	ko00260: Glycine, serine and threonine metabolism; ko00310: Lysine degradation; ko01100: Metabolic pathways; ko04146: Peroxisome
TraesCS5A02G274300	2.33253	0.000800919	0.0037153	up	K02938 large subunit ribosomal protein L8e | (RefSeq) 60S ribosomal protein L8-1-like (A)	ko03010: Ribosome
TraesCS5A02G272400	-1.05874	0.000140431	0.000815331	down	K20547 basic endochitinase B [EC:3.2.1.14] | (RefSeq) chitinase 1 (A)	ko00520: Amino sugar and nucleotide sugar metabolism; ko01100: Metabolic pathways; ko04016: MAPK signaling pathway - plant
TraesCS5A02G269300	-1.27839	1.04764e-07	1.2924e-06	down	K00021 hydroxymethylglutaryl-CoA reductase (NADPH) [EC:1.1.1.34] | (RefSeq) 3-hydroxy-3-methylglutaryl-coenzyme A reductase 3-like (A)	ko00900: Terpenoid backbone biosynthesis; ko01100: Metabolic pathways; ko01110: Biosynthesis of secondary metabolites
TraesCS5A02G265400	-2.85759	2.95851e-24	2.82591e-22	down	K01613 phosphatidylserine decarboxylase [EC:4.1.1.65] | (RefSeq) phosphatidylserine decarboxylase proenzyme 3-like (A)	ko00564: Glycerophospholipid metabolism; ko01100: Metabolic pathways; ko01110: Biosynthesis of secondary metabolites
TraesCS5A02G258100	1.374	0.00141963	0.00603152	up	K18835 WRKY transcription factor 2 | (RefSeq) probable WRKY transcription factor 2 (A)	ko04626: Plant-pathogen interaction
TraesCS5A02G257700	-3.19984	8.58614e-12	2.1623e-10	down	K13993 HSP20 family protein | (RefSeq) small heat shock protein, chloroplastic-like (A)	ko04141: Protein processing in endoplasmic reticulum
TraesCS5A02G257600	1.83677	4.37016e-07	4.75121e-06	up	K00588 caffeoyl-CoA O-methyltransferase [EC:2.1.1.104] | (RefSeq) tricin synthase 2-like isoform X1 (A)	ko00940: Phenylpropanoid biosynthesis; ko00941: Flavonoid biosynthesis; ko00945: Stilbenoid, diarylheptanoid and gingerol biosynthesis; ko01100: Metabolic pathways; ko01110: Biosynthesis of secondary metabolites
TraesCS5A02G249200	1.87461	0.00220577	0.00874557	up	K00430 peroxidase [EC:1.11.1.7] | (RefSeq) peroxidase 17-like (A)	ko00940: Phenylpropanoid biosynthesis; ko01100: Metabolic pathways; ko01110: Biosynthesis of secondary metabolites
TraesCS5A02G247800	1.6965	9.86772e-07	9.94768e-06	up	K00850 6-phosphofructokinase 1 [EC:2.7.1.11] | (RefSeq) ATP-dependent 6-phosphofructokinase 6-like (A)	ko00010: Glycolysis / Gluconeogenesis; ko00030: Pentose phosphate pathway; ko00051: Fructose and mannose metabolism; ko00052: Galactose metabolism; ko01100: Metabolic pathways; ko01110: Biosynthesis of secondary metabolites; ko01200: Carbon metabolism; ko01230: Biosynthesis of amino acids; ko03018: RNA degradation
TraesCS5A02G247600	1.40276	0.0123257	0.0366463	up	K00850 6-phosphofructokinase 1 [EC:2.7.1.11] | (RefSeq) ATP-dependent 6-phosphofructokinase 6-like (A)	ko00010: Glycolysis / Gluconeogenesis; ko00030: Pentose phosphate pathway; ko00051: Fructose and mannose metabolism; ko00052: Galactose metabolism; ko01100: Metabolic pathways; ko01110: Biosynthesis of secondary metabolites; ko01200: Carbon metabolism; ko01230: Biosynthesis of amino acids; ko03018: RNA degradation
TraesCS5A02G245700	-1.21188	1.9474e-06	1.83359e-05	down	K01673 carbonic anhydrase [EC:4.2.1.1] | (RefSeq) beta carbonic anhydrase 5, chloroplastic-like isoform X1 (A)	ko00910: Nitrogen metabolism; ko01100: Metabolic pathways
TraesCS5A02G242900	1.18135	5.13818e-05	0.000337353	up	K17872 demethylphylloquinone reductase [EC:1.6.5.12] | (RefSeq) alternative NAD(P)H-ubiquinone oxidoreductase C1, chloroplastic/mitochondrial-like isoform X1 (A)	ko00130: Ubiquinone and other terpenoid-quinone biosynthesis; ko01100: Metabolic pathways; ko01110: Biosynthesis of secondary metabolites; ko01240: Biosynthesis of cofactors
TraesCS5A02G242300	-3.2903	2.06674e-08	2.91765e-07	down	K17872 demethylphylloquinone reductase [EC:1.6.5.12] | (RefSeq) alternative NAD(P)H-ubiquinone oxidoreductase C1, chloroplastic/mitochondrial-like isoform X1 (A)	ko00130: Ubiquinone and other terpenoid-quinone biosynthesis; ko01100: Metabolic pathways; ko01110: Biosynthesis of secondary metabolites; ko01240: Biosynthesis of cofactors
TraesCS5A02G238100	-3.2723	4.73094e-08	6.23295e-07	down	K01176 alpha-amylase [EC:3.2.1.1] | (RefSeq) alpha-amylase isozyme 3A-like (A)	ko00500: Starch and sucrose metabolism; ko01100: Metabolic pathways; ko01110: Biosynthesis of secondary metabolites
TraesCS5A02G238000	-2.15181	0.000107334	0.00064336	down	K09843 (+)-abscisic acid 8'-hydroxylase [EC:1.14.14.137] | (RefSeq) abscisic acid 8'-hydroxylase 3-like (A)	ko00906: Carotenoid biosynthesis; ko01110: Biosynthesis of secondary metabolites
TraesCS5A02G237200	1.16084	7.97996e-06	6.4999e-05	up	K14432 ABA responsive element binding factor | (RefSeq) bZIP transcription factor TRAB1 isoform X1 (A)	ko04075: Plant hormone signal transduction
TraesCS5A02G234300	-2.02458	0.000173939	0.000983616	down	K05933 aminocyclopropanecarboxylate oxidase [EC:1.14.17.4] | (RefSeq) 1-aminocyclopropane-1-carboxylate oxidase 1-like (A)	ko00270: Cysteine and methionine metabolism; ko01100: Metabolic pathways; ko01110: Biosynthesis of secondary metabolites
TraesCS5A02G229000	-1.53559	0.0178375	0.0494986	down	K02183 calmodulin | (RefSeq) probable calcium-binding protein CML45 (A)	ko04016: MAPK signaling pathway - plant; ko04070: Phosphatidylinositol signaling system; ko04626: Plant-pathogen interaction
TraesCS5A02G225100	-2.0126	2.94234e-05	0.000206191	down	K09753 cinnamoyl-CoA reductase [EC:1.2.1.44] | (RefSeq) cinnamoyl-CoA reductase 1-like (A)	ko00940: Phenylpropanoid biosynthesis; ko01100: Metabolic pathways; ko01110: Biosynthesis of secondary metabolites
TraesCS5A02G221200	-2.15458	2.28518e-07	2.64404e-06	down	K01611 S-adenosylmethionine decarboxylase [EC:4.1.1.50] | (RefSeq) S-adenosylmethionine decarboxylase proenzyme-like isoform X1 (A)	ko00270: Cysteine and methionine metabolism; ko00330: Arginine and proline metabolism; ko01100: Metabolic pathways
TraesCS5A02G221100	-1.86821	0.000123623	0.000727699	down	K01081 5'-nucleotidase [EC:3.1.3.5] | (RefSeq) 5' nucleotidase family protein (A)	ko00230: Purine metabolism; ko00240: Pyrimidine metabolism; ko00760: Nicotinate and nicotinamide metabolism; ko01100: Metabolic pathways; ko01110: Biosynthesis of secondary metabolites; ko01232: Nucleotide metabolism
TraesCS5A02G217200	-2.73322	0.000244549	0.0013264	down	K11816 indole-3-pyruvate monooxygenase [EC:1.14.13.168] | (RefSeq) probable indole-3-pyruvate monooxygenase YUCCA11 (A)	ko00380: Tryptophan metabolism; ko01100: Metabolic pathways
TraesCS5A02G213900	-3.08019	5.26 × 10-38	1.50 × 10-35	down	K00083 cinnamyl-alcohol dehydrogenase [EC:1.1.1.195] | (RefSeq) ELI3-1; cinnamyl alcohol dehydrogenase 7 (A)	ko00940: Phenylpropanoid biosynthesis; ko01100: Metabolic pathways; ko01110: Biosynthesis of secondary metabolites
TraesCS5A02G213400	-2.39635	0.000177667	0.00100247	down	K10728 topoisomerase (DNA) II binding protein 1 | (RefSeq) DNA topoisomerase 2-binding protein 1 isoform X1 (A)	ko03440: Homologous recombination
TraesCS5A02G213000	3.08538	0.00016836	0.000955703	up	K08908 light-harvesting complex I chlorophyll a/b binding protein 2 | (RefSeq) photosystem I chlorophyll a/b-binding protein 6, chloroplastic-like (A)	ko00196: Photosynthesis - antenna proteins; ko01100: Metabolic pathways
TraesCS5A02G211200	-3.78289	0.0014709	0.00620837	down	K14488 SAUR family protein | (RefSeq) uncharacterized protein LOC112283951 (A)	ko04075: Plant hormone signal transduction
TraesCS5A02G200800	-3.25136	0.000285091	0.00151375	down	K20606 mitogen-activated protein kinase kinase kinase ANP1 [EC:2.7.11.25] | (RefSeq) mitogen-activated protein kinase kinase kinase NPK1-like (A)	ko04016: MAPK signaling pathway - plant
TraesCS5A02G199600	-1.07051	0.00925055	0.0289398	down	K12822 RNA-binding protein 25 | (RefSeq) uncharacterized protein LOC123103643 isoform X1 (A)	ko03040: Spliceosome
TraesCS5A02G198800	-1.99299	0.00518873	0.0179695	down	K10260 F-box and WD-40 domain protein 7 | (RefSeq) WD40 repeat protein (A)	ko04120: Ubiquitin mediated proteolysis
TraesCS5A02G193200	-2.2507	0.000694239	0.00327988	down	K05643 ATP-binding cassette, subfamily A (ABC1), member 3 | (RefSeq) ABC transporter A family member 1 isoform X1 (A)	ko02010: ABC transporters
TraesCS5A02G191300	1.53527	2.81836e-06	2.55602e-05	up	K03635 molybdopterin synthase catalytic subunit [EC:2.8.1.12] | (RefSeq) molybdopterin synthase catalytic subunit-like (A)	ko00790: Folate biosynthesis; ko01100: Metabolic pathways; ko01240: Biosynthesis of cofactors; ko04122: Sulfur relay system
TraesCS5A02G190100	-2.69827	1.91142e-06	1.80194e-05	down	K19366 spartin | (RefSeq) senescence/dehydration-associated protein At4g35985, chloroplastic-like (A)	ko04144: Endocytosis
TraesCS5A02G190000	-1.87969	1.79657e-15	7.2418e-14	down	K01087 trehalose 6-phosphate phosphatase [EC:3.1.3.12] | (RefSeq) probable trehalose-phosphate phosphatase 7 (A)	ko00500: Starch and sucrose metabolism; ko01100: Metabolic pathways; ko01110: Biosynthesis of secondary metabolites
TraesCS5A02G189800	-1.43935	2.49085e-09	4.18323e-08	down	K00235 succinate dehydrogenase (ubiquinone) iron-sulfur subunit [EC:1.3.5.1] | (RefSeq) succinate dehydrogenase [ubiquinone] iron-sulfur subunit 2, mitochondrial-like (A)	ko00020: Citrate cycle (TCA cycle); ko00190: Oxidative phosphorylation; ko01100: Metabolic pathways; ko01110: Biosynthesis of secondary metabolites; ko01200: Carbon metabolism
TraesCS5A02G186000	1.29635	3.51821e-06	3.11572e-05	up	K04487 cysteine desulfurase [EC:2.8.1.7] | (RefSeq) cysteine desulfurase, mitochondrial (A)	ko00730: Thiamine metabolism; ko01100: Metabolic pathways; ko01240: Biosynthesis of cofactors; ko04122: Sulfur relay system
TraesCS5A02G185700	-1.82304	0.00142103	0.00603548	down	K16225 probable WRKY transcription factor 52 | (RefSeq) disease resistance protein RRS1-like (A)	ko04626: Plant-pathogen interaction
[truncated: 9,592 more rows]
