# Supplementary material for: Integrated Metabolome and Transcriptome Analyses Reveal Amino Acid Biosynthesis Mechanisms during the Physiological Maturity of Grains in Yunnan Hulled Wheat (Triticum aestivum ssp. yunnanense King)
Source: Int J Mol Sci. 2023 Aug 30;24(17):13475. doi: 10.3390/ijms241713475 (PMC10487551; doi:10.3390/ijms241713475)
Supplement: Supplementary file 1 [file ijms-24-13475-s001.zip › Table S11.xlsx]

## Sheet: Table S11
Table S11.The KEGG pathways were annotated and significantly enriched (P<0.05) among comparative groups of two Yunnan hulled wheat lines.
DWG_vs_DMG.pathenrichment						YWG_vs_YMG.pathenrichment						DWG_vs_YWG.pathenrichment						DMG_vs_YMG.pathenrichment
KEGG_pathway	ko_id	Cluster_frequency	Genome_frequency	P-value	Corrected_P-value	KEGG_pathway	ko_id	Cluster_frequency	Genome_frequency	P-value	Corrected_P-value	KEGG_pathway	ko_id	Cluster_frequency	Genome_frequency	P-value	Corrected_P-value	KEGG_pathway	ko_id	Cluster_frequency	Genome_frequency	P-value	Corrected_P-value
Protein processing in endoplasmic reticulum	ko04141	281 out of 4548 6.17854001759015%	1662 out of 40930 4.06059125335939%	3.60438e-11	5.08218e-09	Valine, leucine and isoleucine degradation	ko00280	55 out of 3046 1.80564674983585%	295 out of 40930 0.720742731492793%	2.39348e-10	3.37481e-08	DNA replication	ko03030	84 out of 2207 3.8060715903942%	563 out of 40930 1.37551917908624%	0	0	DNA replication	ko03030	57 out of 1386 4.11255411255411%	563 out of 40930 1.37551917908624%	0	0
Biosynthesis of cofactors	ko01240	205 out of 4548 4.50747581354442%	1246 out of 40930 3.04422184216956%	5.4416e-09	7.67265e-07	Glycolysis / Gluconeogenesis	ko00010	107 out of 3046 3.51280367695338%	810 out of 40930 1.97898851698021%	5.49311e-09	7.74529e-07	Homologous recombination	ko03440	95 out of 2207 4.30448572723154%	780 out of 40930 1.90569264598094%	4.18576e-12	5.81821e-10	Homologous recombination	ko03440	72 out of 1386 5.19480519480519%	780 out of 40930 1.90569264598094%	0	0
Amino sugar and nucleotide sugar metabolism	ko00520	154 out of 4548 3.38610378188215%	931 out of 40930 2.27461519667725%	3.03367e-07	4.27748e-05	Pyruvate metabolism	ko00620	75 out of 3046 2.46224556795798%	527 out of 40930 1.28756413388712%	5.14455e-08	7.25382e-06	Mismatch repair	ko03430	56 out of 2207 2.5373810602628%	466 out of 40930 1.13852919618861%	2.07119e-08	2.87895e-06	Mismatch repair	ko03430	34 out of 1386 2.45310245310245%	466 out of 40930 1.13852919618861%	2.8314e-05	0.00379407
Valine, leucine and isoleucine degradation	ko00280	62 out of 4548 1.36323658751099%	295 out of 40930 0.720742731492793%	5.85134e-07	8.2504e-05	Protein processing in endoplasmic reticulum	ko04141	175 out of 3046 5.74523965856861%	1662 out of 40930 4.06059125335939%	2.01155e-06	0.000283629	Protein processing in endoplasmic reticulum	ko04141	142 out of 2207 6.43407340280924%	1662 out of 40930 4.06059125335939%	4.1659e-08	5.7906e-06	Nucleotide excision repair	ko03420	36 out of 1386 2.5974025974026%	510 out of 40930 1.24602980698754%	3.35351e-05	0.0044937
Ubiquinone and other terpenoid-quinone biosynthesis	ko00130	64 out of 4548 1.40721196130167%	330 out of 40930 0.806254580991937%	6.67873e-06	0.0009417	Alanine, aspartate and glutamate metabolism	ko00250	41 out of 3046 1.34602757715036%	271 out of 40930 0.662106034693379%	1.17184e-05	0.00165229	Nucleotide excision repair	ko03420	58 out of 2207 2.62800181241504%	510 out of 40930 1.24602980698754%	8.17332e-08	1.13609e-05	Histidine metabolism	ko00340	12 out of 1386 0.865800865800866%	114 out of 40930 0.278524309797215%	0.000498965	0.0668613
Biosynthesis of nucleotide sugars	ko01250	89 out of 4548 1.95690413368514%	504 out of 40930 1.23137063278769%	7.1732e-06	0.00101142	Viral life cycle - HIV-1	ko03250	30 out of 3046 0.984898227183191%	183 out of 40930 0.447104813095529%	3.64751e-05	0.00514299	Valine, leucine and isoleucine degradation	ko00280	33 out of 2207 1.49524241051201%	295 out of 40930 0.720742731492793%	6.49095e-05	0.00902241	RNA polymerase	ko03020	27 out of 1386 1.94805194805195%	401 out of 40930 0.979721475690203%	0.000631862	0.0846695
Glycolysis / Gluconeogenesis	ko00010	131 out of 4548 2.88038698328936%	810 out of 40930 1.97898851698021%	7.17457e-06	0.00101161	Sulfur relay system	ko04122	12 out of 3046 0.393959290873276%	47 out of 40930 0.114830197898852%	0.0001261	0.0177801	Pyrimidine metabolism	ko00240	45 out of 2207 2.03896692342546%	492 out of 40930 1.20205228438798%	0.00042538	0.0591278	Glycolysis / Gluconeogenesis	ko00010	43 out of 1386 3.1024531024531%	810 out of 40930 1.97898851698021%	0.00276966	0.371135
Sulfur relay system	ko04122	16 out of 4548 0.351802990325418%	47 out of 40930 0.114830197898852%	2.67403e-05	0.00377038	Phagosome	ko04145	48 out of 3046 1.57583716349311%	380 out of 40930 0.928414365990716%	0.000239191	0.0337259	Glutathione metabolism	ko00480	56 out of 2207 2.5373810602628%	655 out of 40930 1.600293183484%	0.000502091	0.0697906	Nucleocytoplasmic transport	ko03013	35 out of 1386 2.52525252525253%	641 out of 40930 1.56608844368434%	0.00422846	0.566614
Carbon fixation in photosynthetic organisms	ko00710	64 out of 4548 1.40721196130167%	367 out of 40930 0.896652821891033%	0.000184066	0.0259533	Nucleocytoplasmic transport	ko03013	72 out of 3046 2.36375574523966%	641 out of 40930 1.56608844368434%	0.000333262	0.04699	Pantothenate and CoA biosynthesis	ko00770	19 out of 2207 0.860897145446307%	157 out of 40930 0.383581724896164%	0.00083741	0.1164	Carbon metabolism	ko01200	73 out of 1386 5.26695526695527%	1594 out of 40930 3.89445394576106%	0.00596856	0.799787
Brassinosteroid biosynthesis	ko00905	30 out of 4548 0.659630606860158%	137 out of 40930 0.334717810896653%	0.000205298	0.028947	MAPK signaling pathway - plant	ko04016	162 out of 3046 5.31845042678923%	1690 out of 40930 4.12900073295871%	0.000541707	0.0763807	RNA polymerase	ko03020	36 out of 2207 1.63117353874037%	401 out of 40930 0.979721475690203%	0.00207004	0.287735	Valine, leucine and isoleucine degradation	ko00280	19 out of 1386 1.37085137085137%	295 out of 40930 0.720742731492793%	0.00600224	0.8043
Autophagy - other	ko04136	31 out of 4548 0.681618293755497%	152 out of 40930 0.371365746396286%	0.000602248	0.084917	alpha-Linolenic acid metabolism	ko00592	45 out of 3046 1.47734734077479%	366 out of 40930 0.894209626191058%	0.000655484	0.0924233	Glycine, serine and threonine metabolism	ko00260	37 out of 2207 1.67648391481649%	417 out of 40930 1.01881260688981%	0.00221588	0.308008	beta-Alanine metabolism	ko00410	15 out of 1386 1.08225108225108%	216 out of 40930 0.527730271194723%	0.00711276	0.95311
Nucleotide metabolism	ko01232	88 out of 4548 1.9349164467898%	563 out of 40930 1.37551917908624%	0.000644775	0.0909133	Amino sugar and nucleotide sugar metabolism	ko00520	95 out of 3046 3.1188443860801%	931 out of 40930 2.27461519667725%	0.00114307	0.161173	Glycolysis / Gluconeogenesis	ko00010	63 out of 2207 2.85455369279565%	810 out of 40930 1.97898851698021%	0.00246555	0.342712	Pyrimidine metabolism	ko00240	27 out of 1386 1.94805194805195%	492 out of 40930 1.20205228438798%	0.0103186	1
Pyruvate metabolism	ko00620	82 out of 4548 1.80299032541777%	527 out of 40930 1.28756413388712%	0.00109971	0.15506	Cysteine and methionine metabolism	ko00270	68 out of 3046 2.23243598161523%	630 out of 40930 1.53921329098461%	0.00136783	0.192864	Biosynthesis of cofactors	ko01240	90 out of 2207 4.07793384685093%	1246 out of 40930 3.04422184216956%	0.00314063	0.436547	Amino sugar and nucleotide sugar metabolism	ko00520	45 out of 1386 3.24675324675325%	931 out of 40930 2.27461519667725%	0.0115553	1
Fructose and mannose metabolism	ko00051	64 out of 4548 1.40721196130167%	399 out of 40930 0.974835084290252%	0.00172568	0.243321	Circadian rhythm - plant	ko04712	47 out of 3046 1.543007222587%	406 out of 40930 0.991937454190081%	0.00179977	0.253768	Fructose and mannose metabolism	ko00051	35 out of 2207 1.58586316266425%	399 out of 40930 0.974835084290252%	0.00343734	0.47779	Base excision repair	ko03410	18 out of 1386 1.2987012987013%	293 out of 40930 0.715856340092841%	0.0115984	1
Carbon metabolism	ko01200	212 out of 4548 4.66138962181179%	1594 out of 40930 3.89445394576106%	0.00312613	0.440785	Autophagy - other	ko04136	22 out of 3046 0.72225869993434%	152 out of 40930 0.371365746396286%	0.00203918	0.287525	Biosynthesis of amino acids	ko01230	105 out of 2207 4.75758948799275%	1499 out of 40930 3.66235035426338%	0.00385787	0.536244	Spliceosome	ko03040	58 out of 1386 4.18470418470418%	1270 out of 40930 3.10285853896897%	0.0138794	1
Monobactam biosynthesis	ko00261	14 out of 4548 0.307827616534741%	57 out of 40930 0.139262154898607%	0.00321795	0.453731	Arginine and proline metabolism	ko00330	43 out of 3046 1.41168745896257%	366 out of 40930 0.894209626191058%	0.00207298	0.29229	Ribosome biogenesis in eukaryotes	ko03008	48 out of 2207 2.17489805165383%	597 out of 40930 1.45858783288541%	0.00406997	0.565725	Limonene and pinene degradation	ko00903	4 out of 1386 0.288600288600289%	29 out of 40930 0.0708526752992915%	0.0158385	1
DNA replication	ko03030	84 out of 4548 1.84696569920844%	563 out of 40930 1.37551917908624%	0.00322022	0.45405	Carbon fixation in photosynthetic organisms	ko00710	43 out of 3046 1.41168745896257%	367 out of 40930 0.896652821891033%	0.00218275	0.307768	Carbon metabolism	ko01200	110 out of 2207 4.98414136837336%	1594 out of 40930 3.89445394576106%	0.00494281	0.687051	Nicotinate and nicotinamide metabolism	ko00760	9 out of 1386 0.649350649350649%	115 out of 40930 0.28096750549719%	0.0163891	1
Carotenoid biosynthesis	ko00906	39 out of 4548 0.857519788918206%	225 out of 40930 0.549719032494503%	0.0033404	0.470996	Biosynthesis of nucleotide sugars	ko01250	55 out of 3046 1.80564674983585%	504 out of 40930 1.23137063278769%	0.00292758	0.412788	Pentose phosphate pathway	ko00030	29 out of 2207 1.31400090620752%	328 out of 40930 0.801368189591986%	0.0065065	0.904404	Various types of N-glycan biosynthesis	ko00513	16 out of 1386 1.15440115440115%	260 out of 40930 0.635230881993648%	0.0163955	1
Pyrimidine metabolism	ko00240	74 out of 4548 1.62708883025506%	492 out of 40930 1.20205228438798%	0.00443528	0.625374	Fructose and mannose metabolism	ko00051	45 out of 3046 1.47734734077479%	399 out of 40930 0.974835084290252%	0.00363648	0.512744	Biosynthesis of various plant secondary metabolites	ko00999	38 out of 2207 1.72179429089261%	494 out of 40930 1.20693867578793%	0.0184887	1	Lysine degradation	ko00310	17 out of 1386 1.22655122655123%	284 out of 40930 0.693867578793061%	0.0174644	1
Nucleocytoplasmic transport	ko03013	92 out of 4548 2.02286719437115%	641 out of 40930 1.56608844368434%	0.00639348	0.901481	Plant hormone signal transduction	ko04075	228 out of 3046 7.48522652659225%	2584 out of 40930 6.31321768873687%	0.00380489	0.536489	Histidine metabolism	ko00340	12 out of 2207 0.543724512913457%	114 out of 40930 0.278524309797215%	0.0201544	1	Benzoxazinoid biosynthesis	ko00402	16 out of 1386 1.15440115440115%	262 out of 40930 0.640117273393599%	0.0174919	1
Arginine biosynthesis	ko00220	31 out of 4548 0.681618293755497%	178 out of 40930 0.434888834595651%	0.00763988	1	Carbon metabolism	ko01200	147 out of 3046 4.82600131319764%	1594 out of 40930 3.89445394576106%	0.00414032	0.583786	Proteasome	ko03050	29 out of 2207 1.31400090620752%	359 out of 40930 0.877107256291229%	0.0204318	1	Glycerolipid metabolism	ko00561	33 out of 1386 2.38095238095238%	695 out of 40930 1.69802101148302%	0.0338263	1
Phagosome	ko04145	58 out of 4548 1.27528583992964%	380 out of 40930 0.928414365990716%	0.00795601	1	Biosynthesis of cofactors	ko01240	117 out of 3046 3.84110308601445%	1246 out of 40930 3.04422184216956%	0.00569668	0.803231	Ubiquinone and other terpenoid-quinone biosynthesis	ko00130	27 out of 2207 1.22338015405528%	330 out of 40930 0.806254580991937%	0.0212888	1	Glycosphingolipid biosynthesis - globo and isoglobo series	ko00603	5 out of 1386 0.360750360750361%	54 out of 40930 0.131932567798681%	0.0356204	1
MAPK signaling pathway - plant	ko04016	218 out of 4548 4.79331574318382%	1690 out of 40930 4.12900073295871%	0.0104619	1	Propanoate metabolism	ko00640	20 out of 3046 0.656598818122127%	148 out of 40930 0.361592963596384%	0.00691176	0.974558	beta-Alanine metabolism	ko00410	19 out of 2207 0.860897145446307%	216 out of 40930 0.527730271194723%	0.0252119	1	Pyruvate metabolism	ko00620	26 out of 1386 1.87590187590188%	527 out of 40930 1.28756413388712%	0.0373722	1
Alanine, aspartate and glutamate metabolism	ko00250	43 out of 4548 0.94547053649956%	271 out of 40930 0.662106034693379%	0.0106354	1	Linoleic acid metabolism	ko00591	13 out of 3046 0.426789231779383%	93 out of 40930 0.227217200097728%	0.0201835	1	Nucleotide metabolism	ko01232	41 out of 2207 1.85772541912098%	563 out of 40930 1.37551917908624%	0.0325513	1	Arginine biosynthesis	ko00220	11 out of 1386 0.793650793650794%	178 out of 40930 0.434888834595651%	0.040568	1
ABC transporters	ko02010	74 out of 4548 1.62708883025506%	512 out of 40930 1.25091619838749%	0.0113271	1	DNA replication	ko03030	55 out of 3046 1.80564674983585%	563 out of 40930 1.37551917908624%	0.0240525	1	Glyoxylate and dicarboxylate metabolism	ko00630	48 out of 2207 2.17489805165383%	680 out of 40930 1.66137307598339%	0.035714	1	Carotenoid biosynthesis	ko00906	13 out of 1386 0.937950937950938%	225 out of 40930 0.549719032494503%	0.0437889	1
Purine metabolism	ko00230	78 out of 4548 1.71503957783641%	548 out of 40930 1.33887124358661%	0.0135818	1	Brassinosteroid biosynthesis	ko00905	17 out of 3046 0.558108995403808%	137 out of 40930 0.334717810896653%	0.0260768	1	Valine, leucine and isoleucine biosynthesis	ko00290	8 out of 2207 0.362483008608971%	72 out of 40930 0.175910090398241%	0.0396569	1	Alanine, aspartate and glutamate metabolism	ko00250	15 out of 1386 1.08225108225108%	271 out of 40930 0.662106034693379%	0.0439937	1
Nucleotide excision repair	ko03420	73 out of 4548 1.60510114335972%	510 out of 40930 1.24602980698754%	0.0146007	1	Spliceosome	ko03040	113 out of 3046 3.70978332239002%	1270 out of 40930 3.10285853896897%	0.0276492	1	Sulfur metabolism	ko00920	17 out of 2207 0.770276393294064%	199 out of 40930 0.486195944295138%	0.0416048	1	Biosynthesis of amino acids	ko01230	63 out of 1386 4.54545454545455%	1499 out of 40930 3.66235035426338%	0.0472298	1
Terpenoid backbone biosynthesis	ko00900	38 out of 4548 0.835532102022867%	239 out of 40930 0.583923772294161%	0.0150669	1	Nucleotide excision repair	ko03420	50 out of 3046 1.64149704530532%	510 out of 40930 1.24602980698754%	0.0285613	1	Anthocyanin biosynthesis	ko00942	7 out of 2207 0.31717263253285%	62 out of 40930 0.151478133398485%	0.0487237	1	Glycine, serine and threonine metabolism	ko00260	21 out of 1386 1.51515151515152%	417 out of 40930 1.01881260688981%	0.0475562	1
Galactose metabolism	ko00052	81 out of 4548 1.78100263852243%	581 out of 40930 1.41949670168581%	0.0193507	1	Base excision repair	ko03410	31 out of 3046 1.0177281680893%	293 out of 40930 0.715856340092841%	0.0307196	1	Lysine degradation	ko00310	22 out of 2207 0.996828273674672%	284 out of 40930 0.693867578793061%	0.0571798	1	Glyoxylate and dicarboxylate metabolism	ko00630	31 out of 1386 2.23665223665224%	680 out of 40930 1.66137307598339%	0.0598679	1
Pentose phosphate pathway	ko00030	49 out of 4548 1.07739665787159%	328 out of 40930 0.801368189591986%	0.0197886	1	Inositol phosphate metabolism	ko00562	48 out of 3046 1.57583716349311%	503 out of 40930 1.22892743708771%	0.0464395	1	Propanoate metabolism	ko00640	13 out of 2207 0.589034888989579%	148 out of 40930 0.361592963596384%	0.0572598	1	Protein processing in endoplasmic reticulum	ko04141	68 out of 1386 4.90620490620491%	1662 out of 40930 4.06059125335939%	0.0631918	1
Endocytosis	ko04144	129 out of 4548 2.83641160949868%	992 out of 40930 2.42365013437576%	0.0328963	1	Nucleotide metabolism	ko01232	53 out of 3046 1.73998686802364%	563 out of 40930 1.37551917908624%	0.046842	1	Endocytosis	ko04144	65 out of 2207 2.94517444494789%	992 out of 40930 2.42365013437576%	0.0616949	1	Arginine and proline metabolism	ko00330	18 out of 1386 1.2987012987013%	366 out of 40930 0.894209626191058%	0.0748619	1
Neomycin, kanamycin and gentamicin biosynthesis	ko00524	7 out of 4548 0.15391380826737%	29 out of 40930 0.0708526752992915%	0.0360355	1	Carotenoid biosynthesis	ko00906	24 out of 3046 0.787918581746553%	225 out of 40930 0.549719032494503%	0.0481207	1	Pyruvate metabolism	ko00620	37 out of 2207 1.67648391481649%	527 out of 40930 1.28756413388712%	0.0625175	1	Carbon fixation in photosynthetic organisms	ko00710	18 out of 1386 1.2987012987013%	367 out of 40930 0.896652821891033%	0.0763599	1
Homologous recombination	ko03440	103 out of 4548 2.26473175021988%	780 out of 40930 1.90569264598094%	0.036681	1	Ubiquinone and other terpenoid-quinone biosynthesis	ko00130	33 out of 3046 1.08338804990151%	330 out of 40930 0.806254580991937%	0.0517919	1	Base excision repair	ko03410	22 out of 2207 0.996828273674672%	293 out of 40930 0.715856340092841%	0.0744783	1	Sulfur metabolism	ko00920	11 out of 1386 0.793650793650794%	199 out of 40930 0.486195944295138%	0.0769808	1
Biosynthesis of amino acids	ko01230	188 out of 4548 4.13368513632366%	1499 out of 40930 3.66235035426338%	0.0415029	1	beta-Alanine metabolism	ko00410	23 out of 3046 0.755088640840446%	216 out of 40930 0.527730271194723%	0.052951	1	Benzoxazinoid biosynthesis	ko00402	20 out of 2207 0.906207521522429%	262 out of 40930 0.640117273393599%	0.0754373	1	Pantothenate and CoA biosynthesis	ko00770	9 out of 1386 0.649350649350649%	157 out of 40930 0.383581724896164%	0.0867215	1
Linoleic acid metabolism	ko00591	16 out of 4548 0.351802990325418%	93 out of 40930 0.227217200097728%	0.0502149	1	Biosynthesis of amino acids	ko01230	127 out of 3046 4.16940249507551%	1499 out of 40930 3.66235035426338%	0.0689999	1	Amino sugar and nucleotide sugar metabolism	ko00520	60 out of 2207 2.71862256456729%	931 out of 40930 2.27461519667725%	0.0886502	1	Brassinosteroid biosynthesis	ko00905	8 out of 1386 0.577200577200577%	137 out of 40930 0.334717810896653%	0.0945222	1
Plant hormone signal transduction	ko04075	313 out of 4548 6.88214599824099%	2584 out of 40930 6.31321768873687%	0.0516371	1	Butanoate metabolism	ko00650	14 out of 3046 0.459619172685489%	122 out of 40930 0.298069875397019%	0.0697633	1	Arginine and proline metabolism	ko00330	26 out of 2207 1.17806977797916%	366 out of 40930 0.894209626191058%	0.0937349	1	Biosynthesis of cofactors	ko01240	51 out of 1386 3.67965367965368%	1246 out of 40930 3.04422184216956%	0.0957164	1
Thiamine metabolism	ko00730	16 out of 4548 0.351802990325418%	94 out of 40930 0.229660395797703%	0.0545218	1	Folate biosynthesis	ko00790	14 out of 3046 0.459619172685489%	124 out of 40930 0.30295626679697%	0.0775481	1	Purine metabolism	ko00230	36 out of 2207 1.63117353874037%	548 out of 40930 1.33887124358661%	0.129836	1	SNARE interactions in vesicular transport	ko04130	10 out of 1386 0.721500721500722%	184 out of 40930 0.449548008795504%	0.0965745	1
Cysteine and methionine metabolism	ko00270	83 out of 4548 1.8249780123131%	630 out of 40930 1.53921329098461%	0.0577425	1	Lysine degradation	ko00310	28 out of 3046 0.919238345370978%	284 out of 40930 0.693867578793061%	0.078479	1	Flavone and flavonol biosynthesis	ko00944	11 out of 2207 0.498414136837336%	139 out of 40930 0.339604202296604%	0.130969	1	Sphingolipid metabolism	ko00600	15 out of 1386 1.08225108225108%	307 out of 40930 0.750061079892499%	0.101143	1
Mismatch repair	ko03430	63 out of 4548 1.38522427440633%	466 out of 40930 1.13852919618861%	0.0589557	1	Mismatch repair	ko03430	43 out of 3046 1.41168745896257%	466 out of 40930 1.13852919618861%	0.0855673	1	Citrate cycle (TCA cycle)	ko00020	32 out of 2207 1.44993203443589%	489 out of 40930 1.19472269728805%	0.150749	1	Biotin metabolism	ko00780	6 out of 1386 0.432900432900433%	95 out of 40930 0.232103591497679%	0.103552	1
Spliceosome	ko03040	159 out of 4548 3.49604221635884%	1270 out of 40930 3.10285853896897%	0.0592206	1	Peroxisome	ko04146	43 out of 3046 1.41168745896257%	473 out of 40930 1.15563156608844%	0.101572	1	Starch and sucrose metabolism	ko00500	96 out of 2207 4.34979610330766%	1603 out of 40930 3.91644270706084%	0.153331	1	Nucleotide metabolism	ko01232	25 out of 1386 1.8037518037518%	563 out of 40930 1.37551917908624%	0.104276	1
Nicotinate and nicotinamide metabolism	ko00760	18 out of 4548 0.395778364116095%	115 out of 40930 0.28096750549719%	0.0847916	1	RNA degradation	ko03018	59 out of 3046 1.93696651346028%	671 out of 40930 1.63938431468361%	0.10396	1	Tropane, piperidine and pyridine alkaloid biosynthesis	ko00960	14 out of 2207 0.6343452650657%	193 out of 40930 0.471536770095285%	0.160538	1	N-Glycan biosynthesis	ko00510	14 out of 1386 1.01010101010101%	290 out of 40930 0.708526752992915%	0.118212	1
Biotin metabolism	ko00780	15 out of 4548 0.329815303430079%	95 out of 40930 0.232103591497679%	0.102405	1	Arachidonic acid metabolism	ko00590	14 out of 3046 0.459619172685489%	131 out of 40930 0.320058636696799%	0.10907	1	Various types of N-glycan biosynthesis	ko00513	18 out of 2207 0.815586769370186%	260 out of 40930 0.635230881993648%	0.167531	1	Ubiquinone and other terpenoid-quinone biosynthesis	ko00130	15 out of 1386 1.08225108225108%	330 out of 40930 0.806254580991937%	0.154355	1
Viral life cycle - HIV-1	ko03250	26 out of 4548 0.571679859278804%	183 out of 40930 0.447104813095529%	0.113884	1	Benzoxazinoid biosynthesis	ko00402	25 out of 3046 0.820748522652659%	262 out of 40930 0.640117273393599%	0.120752	1	Spliceosome	ko03040	76 out of 2207 3.44358858178523%	1270 out of 40930 3.10285853896897%	0.186723	1	Anthocyanin biosynthesis	ko00942	4 out of 1386 0.288600288600289%	62 out of 40930 0.151478133398485%	0.158149	1
Ribosome biogenesis in eukaryotes	ko03008	76 out of 4548 1.67106420404573%	597 out of 40930 1.45858783288541%	0.115914	1	Fatty acid degradation	ko00071	26 out of 3046 0.853578463558766%	276 out of 40930 0.674322013193257%	0.128342	1	Nucleocytoplasmic transport	ko03013	40 out of 2207 1.81241504304486%	641 out of 40930 1.56608844368434%	0.190308	1	mRNA surveillance pathway	ko03015	28 out of 1386 2.02020202020202%	678 out of 40930 1.65648668458344%	0.164685	1
Ether lipid metabolism	ko00565	20 out of 4548 0.439753737906772%	138 out of 40930 0.337161006596628%	0.130601	1	Starch and sucrose metabolism	ko00500	131 out of 3046 4.30072225869993%	1603 out of 40930 3.91644270706084%	0.138765	1	One carbon pool by folate	ko00670	6 out of 2207 0.271862256456729%	72 out of 40930 0.175910090398241%	0.191812	1	Glutathione metabolism	ko00480	27 out of 1386 1.94805194805195%	655 out of 40930 1.600293183484%	0.172142	1
Lipoic acid metabolism	ko00785	4 out of 4548 0.0879507475813544%	18 out of 40930 0.0439775225995602%	0.131702	1	Lipoic acid metabolism	ko00785	3 out of 3046 0.0984898227183191%	18 out of 40930 0.0439775225995602%	0.145777	1	SNARE interactions in vesicular transport	ko04130	13 out of 2207 0.589034888989579%	184 out of 40930 0.449548008795504%	0.195163	1	Fructose and mannose metabolism	ko00051	17 out of 1386 1.22655122655123%	399 out of 40930 0.974835084290252%	0.198901	1
Glycine, serine and threonine metabolism	ko00260	54 out of 4548 1.18733509234829%	417 out of 40930 1.01881260688981%	0.131806	1	Flavone and flavonol biosynthesis	ko00944	14 out of 3046 0.459619172685489%	139 out of 40930 0.339604202296604%	0.153192	1	Limonene and pinene degradation	ko00903	3 out of 2207 0.135931128228364%	29 out of 40930 0.0708526752992915%	0.204043	1	Non-homologous end-joining	ko03450	3 out of 1386 0.216450216450216%	46 out of 40930 0.112387002198876%	0.203701	1
RNA degradation	ko03018	84 out of 4548 1.84696569920844%	671 out of 40930 1.63938431468361%	0.134705	1	Vitamin B6 metabolism	ko00750	7 out of 3046 0.229809586342745%	60 out of 40930 0.146591741998534%	0.156682	1	Terpenoid backbone biosynthesis	ko00900	16 out of 2207 0.724966017217943%	239 out of 40930 0.583923772294161%	0.220777	1	Tropane, piperidine and pyridine alkaloid biosynthesis	ko00960	9 out of 1386 0.649350649350649%	193 out of 40930 0.471536770095285%	0.209179	1
Ubiquitin mediated proteolysis	ko04120	165 out of 4548 3.62796833773087%	1367 out of 40930 3.3398485218666%	0.1354	1	Steroid biosynthesis	ko00100	21 out of 3046 0.689428759028234%	223 out of 40930 0.544832641094552%	0.158443	1	N-Glycan biosynthesis	ko00510	19 out of 2207 0.860897145446307%	290 out of 40930 0.708526752992915%	0.222322	1	Thiamine metabolism	ko00730	5 out of 1386 0.360750360750361%	94 out of 40930 0.229660395797703%	0.213672	1
Arachidonic acid metabolism	ko00590	19 out of 4548 0.417766051011434%	131 out of 40930 0.320058636696799%	0.137082	1	Limonene and pinene degradation	ko00903	4 out of 3046 0.131319763624425%	29 out of 40930 0.0708526752992915%	0.165889	1	Cyanoamino acid metabolism	ko00460	36 out of 2207 1.63117353874037%	588 out of 40930 1.43659907158563%	0.238368	1	Pentose phosphate pathway	ko00030	14 out of 1386 1.01010101010101%	328 out of 40930 0.801368189591986%	0.224862	1
Inositol phosphate metabolism	ko00562	64 out of 4548 1.40721196130167%	503 out of 40930 1.22892743708771%	0.139274	1	Purine metabolism	ko00230	47 out of 3046 1.543007222587%	548 out of 40930 1.33887124358661%	0.173532	1	Thiamine metabolism	ko00730	7 out of 2207 0.31717263253285%	94 out of 40930 0.229660395797703%	0.243827	1	Fatty acid degradation	ko00071	12 out of 1386 0.865800865800866%	276 out of 40930 0.674322013193257%	0.228208	1
Glycosphingolipid biosynthesis - globo and isoglobo series	ko00603	9 out of 4548 0.197889182058047%	54 out of 40930 0.131932567798681%	0.140179	1	Pentose phosphate pathway	ko00030	29 out of 3046 0.952068286277085%	328 out of 40930 0.801368189591986%	0.191569	1	Sulfur relay system	ko04122	4 out of 2207 0.181241504304486%	47 out of 40930 0.114830197898852%	0.246835	1	Purine metabolism	ko00230	22 out of 1386 1.58730158730159%	548 out of 40930 1.33887124358661%	0.236237	1
Porphyrin metabolism	ko00860	32 out of 4548 0.703605980650836%	237 out of 40930 0.57903738089421%	0.142707	1	Isoflavonoid biosynthesis	ko00943	25 out of 3046 0.820748522652659%	279 out of 40930 0.681651600293184%	0.193609	1	Phenylalanine, tyrosine and tryptophan biosynthesis	ko00400	14 out of 2207 0.6343452650657%	214 out of 40930 0.522843879794772%	0.266331	1	Ribosome	ko03010	63 out of 1386 4.54545454545455%	1717 out of 40930 4.19496701685805%	0.272073	1
Circadian rhythm - plant	ko04712	52 out of 4548 1.14335971855761%	406 out of 40930 0.991937454190081%	0.155366	1	Galactose metabolism	ko00052	49 out of 3046 1.60866710439921%	581 out of 40930 1.41949670168581%	0.199164	1	Nicotinate and nicotinamide metabolism	ko00760	8 out of 2207 0.362483008608971%	115 out of 40930 0.28096750549719%	0.280722	1	Aminoacyl-tRNA biosynthesis	ko00970	18 out of 1386 1.2987012987013%	453 out of 40930 1.10676765208893%	0.277156	1
Sphingolipid metabolism	ko00600	40 out of 4548 0.879507475813544%	307 out of 40930 0.750061079892499%	0.16266	1	Endocytosis	ko04144	81 out of 3046 2.65922521339462%	992 out of 40930 2.42365013437576%	0.205207	1	Alanine, aspartate and glutamate metabolism	ko00250	17 out of 2207 0.770276393294064%	271 out of 40930 0.662106034693379%	0.295117	1	Viral life cycle - HIV-1	ko03250	8 out of 1386 0.577200577200577%	183 out of 40930 0.447104813095529%	0.281278	1
Glyoxylate and dicarboxylate metabolism	ko00630	84 out of 4548 1.84696569920844%	680 out of 40930 1.66137307598339%	0.164012	1	Aflatoxin biosynthesis	ko00254	2 out of 3046 0.0656598818122127%	12 out of 40930 0.0293183483997068%	0.223213	1	2-Oxocarboxylic acid metabolism	ko01210	34 out of 2207 1.54055278658813%	570 out of 40930 1.39262154898607%	0.295963	1	C5-Branched dibasic acid metabolism	ko00660	2 out of 1386 0.144300144300144%	32 out of 40930 0.0781822623992182%	0.29547	1
Lysine degradation	ko00310	37 out of 4548 0.813544415127529%	284 out of 40930 0.693867578793061%	0.173571	1	Sulfur metabolism	ko00920	18 out of 3046 0.590938936309915%	199 out of 40930 0.486195944295138%	0.227615	1	Sphingolipid metabolism	ko00600	19 out of 2207 0.860897145446307%	307 out of 40930 0.750061079892499%	0.300975	1	Riboflavin metabolism	ko00740	5 out of 1386 0.360750360750361%	109 out of 40930 0.266308331297337%	0.309904	1
Glycosaminoglycan degradation	ko00531	26 out of 4548 0.571679859278804%	194 out of 40930 0.47397996579526%	0.181618	1	Pyrimidine metabolism	ko00240	41 out of 3046 1.34602757715036%	492 out of 40930 1.20205228438798%	0.246775	1	Phagosome	ko04145	23 out of 2207 1.04213864975079%	380 out of 40930 0.928414365990716%	0.313915	1	Glycosaminoglycan degradation	ko00531	8 out of 1386 0.577200577200577%	194 out of 40930 0.47397996579526%	0.336131	1
Benzoxazinoid biosynthesis	ko00402	34 out of 4548 0.747581354441513%	262 out of 40930 0.640117273393599%	0.191589	1	Phosphatidylinositol signaling system	ko04070	42 out of 3046 1.37885751805647%	512 out of 40930 1.25091619838749%	0.277172	1	Nitrogen metabolism	ko00910	16 out of 2207 0.724966017217943%	258 out of 40930 0.630344490593697%	0.31854	1	Steroid biosynthesis	ko00100	9 out of 1386 0.649350649350649%	223 out of 40930 0.544832641094552%	0.343827	1
Butanoate metabolism	ko00650	17 out of 4548 0.373790677220756%	122 out of 40930 0.298069875397019%	0.194734	1	Cutin, suberine and wax biosynthesis	ko00073	38 out of 3046 1.24753775443204%	464 out of 40930 1.13364280478866%	0.292564	1	Cysteine and methionine metabolism	ko00270	37 out of 2207 1.67648391481649%	630 out of 40930 1.53921329098461%	0.319177	1	Ribosome biogenesis in eukaryotes	ko03008	22 out of 1386 1.58730158730159%	597 out of 40930 1.45858783288541%	0.372974	1
Starch and sucrose metabolism	ko00500	189 out of 4548 4.155672823219%	1603 out of 40930 3.91644270706084%	0.199204	1	Anthocyanin biosynthesis	ko00942	6 out of 3046 0.196979645436638%	62 out of 40930 0.151478133398485%	0.313877	1	Glycosphingolipid biosynthesis - globo and isoglobo series	ko00603	4 out of 2207 0.181241504304486%	54 out of 40930 0.131932567798681%	0.33237	1	Phosphatidylinositol signaling system	ko04070	19 out of 1386 1.37085137085137%	512 out of 40930 1.25091619838749%	0.374534	1
Flavone and flavonol biosynthesis	ko00944	19 out of 4548 0.417766051011434%	139 out of 40930 0.339604202296604%	0.201126	1	Glycine, serine and threonine metabolism	ko00260	34 out of 3046 1.11621799080762%	417 out of 40930 1.01881260688981%	0.314538	1	Carbon fixation in photosynthetic organisms	ko00710	22 out of 2207 0.996828273674672%	367 out of 40930 0.896652821891033%	0.335207	1	Basal transcription factors	ko03022	10 out of 1386 0.721500721500722%	259 out of 40930 0.632787686293672%	0.381726	1
Phenylalanine, tyrosine and tryptophan biosynthesis	ko00400	28 out of 4548 0.615655233069481%	214 out of 40930 0.522843879794772%	0.2057	1	N-Glycan biosynthesis	ko00510	24 out of 3046 0.787918581746553%	290 out of 40930 0.708526752992915%	0.324143	1	Folate biosynthesis	ko00790	8 out of 2207 0.362483008608971%	124 out of 40930 0.30295626679697%	0.353219	1	Citrate cycle (TCA cycle)	ko00020	18 out of 1386 1.2987012987013%	489 out of 40930 1.19472269728805%	0.392561	1
Folate biosynthesis	ko00790	17 out of 4548 0.373790677220756%	124 out of 40930 0.30295626679697%	0.21363	1	Ether lipid metabolism	ko00565	12 out of 3046 0.393959290873276%	138 out of 40930 0.337161006596628%	0.330727	1	Flavonoid biosynthesis	ko00941	37 out of 2207 1.67648391481649%	643 out of 40930 1.57097483508429%	0.365263	1	Monoterpenoid biosynthesis	ko00902	4 out of 1386 0.288600288600289%	94 out of 40930 0.229660395797703%	0.394441	1
Limonene and pinene degradation	ko00903	5 out of 4548 0.109938434476693%	29 out of 40930 0.0708526752992915%	0.214648	1	Arginine biosynthesis	ko00220	15 out of 3046 0.492449113591596%	178 out of 40930 0.434888834595651%	0.346944	1	Viral life cycle - HIV-1	ko03250	11 out of 2207 0.498414136837336%	183 out of 40930 0.447104813095529%	0.39985	1	Butanoate metabolism	ko00650	5 out of 1386 0.360750360750361%	122 out of 40930 0.298069875397019%	0.397241	1
Nitrogen metabolism	ko00910	33 out of 4548 0.725593667546174%	258 out of 40930 0.630344490593697%	0.219945	1	Ribosome biogenesis in eukaryotes	ko03008	47 out of 3046 1.543007222587%	597 out of 40930 1.45858783288541%	0.365179	1	Galactose metabolism	ko00052	33 out of 2207 1.49524241051201%	581 out of 40930 1.41949670168581%	0.404324	1	Galactose metabolism	ko00052	21 out of 1386 1.51515151515152%	581 out of 40930 1.41949670168581%	0.411249	1
beta-Alanine metabolism	ko00410	28 out of 4548 0.615655233069481%	216 out of 40930 0.527730271194723%	0.220199	1	Glycerophospholipid metabolism	ko00564	58 out of 3046 1.90413657255417%	742 out of 40930 1.81285120938187%	0.36725	1	Circadian rhythm - plant	ko04712	23 out of 2207 1.04213864975079%	406 out of 40930 0.991937454190081%	0.43413	1	Terpenoid backbone biosynthesis	ko00900	9 out of 1386 0.649350649350649%	239 out of 40930 0.583923772294161%	0.420694	1
Riboflavin metabolism	ko00740	15 out of 4548 0.329815303430079%	109 out of 40930 0.266308331297337%	0.227325	1	Mannose type O-glycan biosynthesis	ko00515	1 out of 3046 0.0328299409061064%	6 out of 40930 0.0146591741998534%	0.371259	1	Carotenoid biosynthesis	ko00906	13 out of 2207 0.589034888989579%	225 out of 40930 0.549719032494503%	0.439583	1	MAPK signaling pathway - plant	ko04016	59 out of 1386 4.25685425685426%	1690 out of 40930 4.12900073295871%	0.42322	1
Peroxisome	ko04146	58 out of 4548 1.27528583992964%	473 out of 40930 1.15563156608844%	0.230845	1	Glycosphingolipid biosynthesis - globo and isoglobo series	ko00603	5 out of 3046 0.164149704530532%	54 out of 40930 0.131932567798681%	0.374849	1	Biosynthesis of secondary metabolites	ko01110	595 out of 2207 26.9596737652923%	10975 out of 40930 26.8140728072319%	0.445363	1	Proteasome	ko03050	13 out of 1386 0.937950937950938%	359 out of 40930 0.877107256291229%	0.442313	1
Tropane, piperidine and pyridine alkaloid biosynthesis	ko00960	25 out of 4548 0.549692172383465%	193 out of 40930 0.471536770095285%	0.236886	1	Flavonoid biosynthesis	ko00941	50 out of 3046 1.64149704530532%	643 out of 40930 1.57097483508429%	0.393943	1	Non-homologous end-joining	ko03450	3 out of 2207 0.135931128228364%	46 out of 40930 0.112387002198876%	0.454624	1	Glycosphingolipid biosynthesis - ganglio series	ko00604	5 out of 1386 0.360750360750361%	131 out of 40930 0.320058636696799%	0.457264	1
Biosynthesis of secondary metabolites	ko01110	1239 out of 4548 27.2427440633245%	10975 out of 40930 26.8140728072319%	0.249653	1	Thiamine metabolism	ko00730	8 out of 3046 0.262639527248851%	94 out of 40930 0.229660395797703%	0.400494	1	Caffeine metabolism	ko00232	1 out of 2207 0.0453103760761214%	11 out of 40930 0.0268751526997312%	0.456541	1	Glycerophospholipid metabolism	ko00564	26 out of 1386 1.87590187590188%	742 out of 40930 1.81285120938187%	0.45734	1
C5-Branched dibasic acid metabolism	ko00660	5 out of 4548 0.109938434476693%	32 out of 40930 0.0781822623992182%	0.279701	1	Monobactam biosynthesis	ko00261	5 out of 3046 0.164149704530532%	57 out of 40930 0.139262154898607%	0.420097	1	Glycosylphosphatidylinositol (GPI)-anchor biosynthesis	ko00563	8 out of 2207 0.362483008608971%	140 out of 40930 0.34204739799658%	0.484868	1	Lipoic acid metabolism	ko00785	1 out of 1386 0.0721500721500721%	18 out of 40930 0.0439775225995602%	0.462173	1
Pantothenate and CoA biosynthesis	ko00770	20 out of 4548 0.439753737906772%	157 out of 40930 0.383581724896164%	0.292394	1	Ubiquitin mediated proteolysis	ko04120	104 out of 3046 3.41431385423506%	1367 out of 40930 3.3398485218666%	0.421243	1	Aflatoxin biosynthesis	ko00254	1 out of 2207 0.0453103760761214%	12 out of 40930 0.0293183483997068%	0.485853	1	Sulfur relay system	ko04122	2 out of 1386 0.144300144300144%	47 out of 40930 0.114830197898852%	0.47574	1
Fatty acid metabolism	ko01212	48 out of 4548 1.05540897097625%	399 out of 40930 0.974835084290252%	0.300978	1	Lysine biosynthesis	ko00300	6 out of 3046 0.196979645436638%	70 out of 40930 0.17102369899829%	0.422106	1	Butanoate metabolism	ko00650	7 out of 2207 0.31717263253285%	122 out of 40930 0.298069875397019%	0.488415	1	Ubiquitin mediated proteolysis	ko04120	47 out of 1386 3.39105339105339%	1367 out of 40930 3.3398485218666%	0.478481	1
Glycerophospholipid metabolism	ko00564	87 out of 4548 1.91292875989446%	742 out of 40930 1.81285120938187%	0.31245	1	Phenylalanine, tyrosine and tryptophan biosynthesis	ko00400	17 out of 3046 0.558108995403808%	214 out of 40930 0.522843879794772%	0.426298	1	mRNA surveillance pathway	ko03015	37 out of 2207 1.67648391481649%	678 out of 40930 1.65648668458344%	0.494143	1	Zeatin biosynthesis	ko00908	11 out of 1386 0.793650793650794%	311 out of 40930 0.759833862692402%	0.484493	1
RNA polymerase	ko03020	48 out of 4548 1.05540897097625%	401 out of 40930 0.979721475690203%	0.31365	1	Other glycan degradation	ko00511	35 out of 3046 1.14904793171372%	452 out of 40930 1.10432445638896%	0.428669	1	ABC transporters	ko02010	28 out of 2207 1.2686905301314%	512 out of 40930 1.25091619838749%	0.497019	1	Phagosome	ko04145	13 out of 1386 0.937950937950938%	380 out of 40930 0.928414365990716%	0.524394	1
Flavonoid biosynthesis	ko00941	75 out of 4548 1.6490765171504%	643 out of 40930 1.57097483508429%	0.344777	1	Valine, leucine and isoleucine biosynthesis	ko00290	6 out of 3046 0.196979645436638%	72 out of 40930 0.175910090398241%	0.449047	1	Porphyrin metabolism	ko00860	13 out of 2207 0.589034888989579%	237 out of 40930 0.57903738089421%	0.515102	1	Peroxisome	ko04146	16 out of 1386 1.15440115440115%	473 out of 40930 1.15563156608844%	0.537264	1
Vitamin B6 metabolism	ko00750	8 out of 4548 0.175901495162709%	60 out of 40930 0.146591741998534%	0.348585	1	Non-homologous end-joining	ko03450	4 out of 3046 0.131319763624425%	46 out of 40930 0.112387002198876%	0.450313	1	C5-Branched dibasic acid metabolism	ko00660	2 out of 2207 0.0906207521522429%	32 out of 40930 0.0781822623992182%	0.520891	1	Inositol phosphate metabolism	ko00562	17 out of 1386 1.22655122655123%	503 out of 40930 1.22892743708771%	0.537749	1
Sulfur metabolism	ko00920	24 out of 4548 0.527704485488127%	199 out of 40930 0.486195944295138%	0.367	1	Biosynthesis of secondary metabolites	ko01110	820 out of 3046 26.9205515430072%	10975 out of 40930 26.8140728072319%	0.452485	1	Lysine biosynthesis	ko00300	4 out of 2207 0.181241504304486%	70 out of 40930 0.17102369899829%	0.525834	1	Endocytosis	ko04144	33 out of 1386 2.38095238095238%	992 out of 40930 2.42365013437576%	0.566897	1
alpha-Linolenic acid metabolism	ko00592	43 out of 4548 0.94547053649956%	366 out of 40930 0.894209626191058%	0.372539	1	ABC transporters	ko02010	39 out of 3046 1.28036769533815%	512 out of 40930 1.25091619838749%	0.463886	1	Riboflavin metabolism	ko00740	6 out of 2207 0.271862256456729%	109 out of 40930 0.266308331297337%	0.538614	1	Monobactam biosynthesis	ko00261	2 out of 1386 0.144300144300144%	57 out of 40930 0.139262154898607%	0.579431	1
Lysine biosynthesis	ko00300	9 out of 4548 0.197889182058047%	70 out of 40930 0.17102369899829%	0.374438	1	Histidine metabolism	ko00340	9 out of 3046 0.295469468154957%	114 out of 40930 0.278524309797215%	0.477314	1	Ubiquitin mediated proteolysis	ko04120	73 out of 2207 3.30765745355686%	1367 out of 40930 3.3398485218666%	0.55204	1	alpha-Linolenic acid metabolism	ko00592	12 out of 1386 0.865800865800866%	366 out of 40930 0.894209626191058%	0.585953	1
Propanoate metabolism	ko00640	18 out of 4548 0.395778364116095%	148 out of 40930 0.361592963596384%	0.379281	1	Glycosaminoglycan degradation	ko00531	15 out of 3046 0.492449113591596%	194 out of 40930 0.47397996579526%	0.477681	1	MAPK signaling pathway - plant	ko04016	90 out of 2207 4.07793384685093%	1690 out of 40930 4.12900073295871%	0.56528	1	Phenylalanine, tyrosine and tryptophan biosynthesis	ko00400	7 out of 1386 0.505050505050505%	214 out of 40930 0.522843879794772%	0.589901	1
Anthocyanin biosynthesis	ko00942	8 out of 4548 0.175901495162709%	62 out of 40930 0.151478133398485%	0.383583	1	Porphyrin metabolism	ko00860	18 out of 3046 0.590938936309915%	237 out of 40930 0.57903738089421%	0.499624	1	Taurine and hypotaurine metabolism	ko00430	5 out of 2207 0.226551880380607%	96 out of 40930 0.234546787197655%	0.595658	1	Fatty acid metabolism	ko01212	13 out of 1386 0.937950937950938%	399 out of 40930 0.974835084290252%	0.59535	1
Histidine metabolism	ko00340	14 out of 4548 0.307827616534741%	114 out of 40930 0.278524309797215%	0.388018	1	Pantothenate and CoA biosynthesis	ko00770	12 out of 3046 0.393959290873276%	157 out of 40930 0.383581724896164%	0.505056	1	Monobactam biosynthesis	ko00261	3 out of 2207 0.135931128228364%	57 out of 40930 0.139262154898607%	0.599747	1	Isoflavonoid biosynthesis	ko00943	9 out of 1386 0.649350649350649%	279 out of 40930 0.681651600293184%	0.605423	1
Aflatoxin biosynthesis	ko00254	2 out of 4548 0.0439753737906772%	12 out of 40930 0.0293183483997068%	0.391748	1	Ascorbate and aldarate metabolism	ko00053	35 out of 3046 1.14904793171372%	468 out of 40930 1.14341558758857%	0.513391	1	Brassinosteroid biosynthesis	ko00905	7 out of 2207 0.31717263253285%	137 out of 40930 0.334717810896653%	0.61197	1	Phosphonate and phosphinate metabolism	ko00440	1 out of 1386 0.0721500721500721%	27 out of 40930 0.0659662838993403%	0.605617	1
Biosynthesis of various plant secondary metabolites	ko00999	57 out of 4548 1.2532981530343%	494 out of 40930 1.20693867578793%	0.40174	1	Glyoxylate and dicarboxylate metabolism	ko00630	50 out of 3046 1.64149704530532%	680 out of 40930 1.66137307598339%	0.556882	1	Tryptophan metabolism	ko00380	34 out of 2207 1.54055278658813%	657 out of 40930 1.60517957488395%	0.622822	1	Linoleic acid metabolism	ko00591	3 out of 1386 0.216450216450216%	93 out of 40930 0.227217200097728%	0.613887	1
One carbon pool by folate	ko00670	9 out of 4548 0.197889182058047%	72 out of 40930 0.175910090398241%	0.407335	1	Various types of N-glycan biosynthesis	ko00513	19 out of 3046 0.623768877216021%	260 out of 40930 0.635230881993648%	0.567076	1	Fatty acid degradation	ko00071	14 out of 2207 0.6343452650657%	276 out of 40930 0.674322013193257%	0.63115	1	Taurine and hypotaurine metabolism	ko00430	3 out of 1386 0.216450216450216%	96 out of 40930 0.234546787197655%	0.635311	1
Valine, leucine and isoleucine biosynthesis	ko00290	9 out of 4548 0.197889182058047%	72 out of 40930 0.175910090398241%	0.407335	1	Caffeine metabolism	ko00232	1 out of 3046 0.0328299409061064%	11 out of 40930 0.0268751526997312%	0.572921	1	Biosynthesis of unsaturated fatty acids	ko01040	10 out of 2207 0.453103760761214%	199 out of 40930 0.486195944295138%	0.635476	1	Tryptophan metabolism	ko00380	21 out of 1386 1.51515151515152%	657 out of 40930 1.60517957488395%	0.63741	1
Fatty acid degradation	ko00071	32 out of 4548 0.703605980650836%	276 out of 40930 0.674322013193257%	0.427096	1	Biosynthesis of various plant secondary metabolites	ko00999	36 out of 3046 1.18187787261983%	494 out of 40930 1.20693867578793%	0.57727	1	Basal transcription factors	ko03022	13 out of 2207 0.589034888989579%	259 out of 40930 0.632787686293672%	0.644182	1	Nitrogen metabolism	ko00910	8 out of 1386 0.577200577200577%	258 out of 40930 0.630344490593697%	0.648752	1
Other types of O-glycan biosynthesis	ko00514	9 out of 4548 0.197889182058047%	74 out of 40930 0.180796481798192%	0.440233	1	Tropane, piperidine and pyridine alkaloid biosynthesis	ko00960	14 out of 3046 0.459619172685489%	193 out of 40930 0.471536770095285%	0.579266	1	Glucosinolate biosynthesis	ko00966	4 out of 2207 0.181241504304486%	84 out of 40930 0.205228438797948%	0.669987	1	Flavone and flavonol biosynthesis	ko00944	4 out of 1386 0.288600288600289%	139 out of 40930 0.339604202296604%	0.696472	1
Protein export	ko03060	36 out of 4548 0.79155672823219%	314 out of 40930 0.767163449792328%	0.447263	1	Glutathione metabolism	ko00480	47 out of 3046 1.543007222587%	655 out of 40930 1.600293183484%	0.624928	1	RNA degradation	ko03018	34 out of 2207 1.54055278658813%	671 out of 40930 1.63938431468361%	0.670863	1	Valine, leucine and isoleucine biosynthesis	ko00290	2 out of 1386 0.144300144300144%	72 out of 40930 0.175910090398241%	0.705295	1
Glutathione metabolism	ko00480	74 out of 4548 1.62708883025506%	655 out of 40930 1.600293183484%	0.457923	1	Biosynthesis of unsaturated fatty acids	ko01040	14 out of 3046 0.459619172685489%	199 out of 40930 0.486195944295138%	0.625684	1	Glycerolipid metabolism	ko00561	35 out of 2207 1.58586316266425%	695 out of 40930 1.69802101148302%	0.686366	1	One carbon pool by folate	ko00670	2 out of 1386 0.144300144300144%	72 out of 40930 0.175910090398241%	0.705295	1
Fatty acid biosynthesis	ko00061	23 out of 4548 0.505716798592788%	200 out of 40930 0.488639139995114%	0.463613	1	Neomycin, kanamycin and gentamicin biosynthesis	ko00524	2 out of 3046 0.0656598818122127%	29 out of 40930 0.0708526752992915%	0.646368	1	Arginine biosynthesis	ko00220	8 out of 2207 0.362483008608971%	178 out of 40930 0.434888834595651%	0.749214	1	Ascorbate and aldarate metabolism	ko00053	14 out of 1386 1.01010101010101%	468 out of 40930 1.14341558758857%	0.718405	1
Base excision repair	ko03410	33 out of 4548 0.725593667546174%	293 out of 40930 0.715856340092841%	0.494703	1	Glycosphingolipid biosynthesis - ganglio series	ko00604	9 out of 3046 0.295469468154957%	131 out of 40930 0.320058636696799%	0.646583	1	Biotin metabolism	ko00780	4 out of 2207 0.181241504304486%	95 out of 40930 0.232103591497679%	0.759912	1	Biosynthesis of nucleotide sugars	ko01250	15 out of 1386 1.08225108225108%	504 out of 40930 1.23137063278769%	0.73016	1
Ascorbate and aldarate metabolism	ko00053	52 out of 4548 1.14335971855761%	468 out of 40930 1.14341558758857%	0.522178	1	Protein export	ko03060	22 out of 3046 0.72225869993434%	314 out of 40930 0.767163449792328%	0.647067	1	alpha-Linolenic acid metabolism	ko00592	17 out of 2207 0.770276393294064%	366 out of 40930 0.894209626191058%	0.769561	1	Propanoate metabolism	ko00640	4 out of 1386 0.288600288600289%	148 out of 40930 0.361592963596384%	0.74195	1
Isoflavonoid biosynthesis	ko00943	31 out of 4548 0.681618293755497%	279 out of 40930 0.681651600293184%	0.528483	1	Other types of O-glycan biosynthesis	ko00514	5 out of 3046 0.164149704530532%	74 out of 40930 0.180796481798192%	0.652883	1	Ascorbate and aldarate metabolism	ko00053	22 out of 2207 0.996828273674672%	468 out of 40930 1.14341558758857%	0.7754	1	Selenocompound metabolism	ko00450	5 out of 1386 0.360750360750361%	190 out of 40930 0.464207182995358%	0.774287	1
Arginine and proline metabolism	ko00330	40 out of 4548 0.879507475813544%	366 out of 40930 0.894209626191058%	0.5693	1	Fatty acid metabolism	ko01212	28 out of 3046 0.919238345370978%	399 out of 40930 0.974835084290252%	0.654734	1	Diterpenoid biosynthesis	ko00904	12 out of 2207 0.543724512913457%	266 out of 40930 0.649890056193501%	0.775918	1	Biosynthesis of various plant secondary metabolites	ko00999	14 out of 1386 1.01010101010101%	494 out of 40930 1.20693867578793%	0.786733	1
SNARE interactions in vesicular transport	ko04130	20 out of 4548 0.439753737906772%	184 out of 40930 0.449548008795504%	0.576553	1	C5-Branched dibasic acid metabolism	ko00660	2 out of 3046 0.0656598818122127%	32 out of 40930 0.0781822623992182%	0.69932	1	Neomycin, kanamycin and gentamicin biosynthesis	ko00524	1 out of 2207 0.0453103760761214%	29 out of 40930 0.0708526752992915%	0.799717	1	Folate biosynthesis	ko00790	3 out of 1386 0.216450216450216%	124 out of 40930 0.30295626679697%	0.795055	1
Phosphonate and phosphinate metabolism	ko00440	3 out of 4548 0.0659630606860158%	27 out of 40930 0.0659662838993403%	0.590154	1	Riboflavin metabolism	ko00740	7 out of 3046 0.229809586342745%	109 out of 40930 0.266308331297337%	0.710131	1	Ribosome	ko03010	85 out of 2207 3.85138196647032%	1717 out of 40930 4.19496701685805%	0.81036	1	Diterpenoid biosynthesis	ko00904	7 out of 1386 0.505050505050505%	266 out of 40930 0.649890056193501%	0.799481	1
Non-homologous end-joining	ko03450	5 out of 4548 0.109938434476693%	46 out of 40930 0.112387002198876%	0.590222	1	Phenylalanine metabolism	ko00360	22 out of 3046 0.72225869993434%	334 out of 40930 0.81602736379184%	0.754174	1	Glycerophospholipid metabolism	ko00564	35 out of 2207 1.58586316266425%	742 out of 40930 1.81285120938187%	0.815915	1	Biosynthesis of unsaturated fatty acids	ko01040	5 out of 1386 0.360750360750361%	199 out of 40930 0.486195944295138%	0.807264	1
Glycosylphosphatidylinositol (GPI)-anchor biosynthesis	ko00563	15 out of 4548 0.329815303430079%	140 out of 40930 0.34204739799658%	0.599449	1	Nicotinate and nicotinamide metabolism	ko00760	7 out of 3046 0.229809586342745%	115 out of 40930 0.28096750549719%	0.760703	1	Phenylpropanoid biosynthesis	ko00940	76 out of 2207 3.44358858178523%	1547 out of 40930 3.7796237478622%	0.817508	1	Fatty acid biosynthesis	ko00061	5 out of 1386 0.360750360750361%	200 out of 40930 0.488639139995114%	0.81068	1
Steroid biosynthesis	ko00100	23 out of 4548 0.505716798592788%	223 out of 40930 0.544832641094552%	0.679237	1	One carbon pool by folate	ko00670	4 out of 3046 0.131319763624425%	72 out of 40930 0.175910090398241%	0.792891	1	Glycosaminoglycan degradation	ko00531	8 out of 2207 0.362483008608971%	194 out of 40930 0.47397996579526%	0.826513	1	Porphyrin metabolism	ko00860	6 out of 1386 0.432900432900433%	237 out of 40930 0.57903738089421%	0.816587	1
N-Glycan biosynthesis	ko00510	30 out of 4548 0.659630606860158%	290 out of 40930 0.708526752992915%	0.688891	1	RNA polymerase	ko03020	26 out of 3046 0.853578463558766%	401 out of 40930 0.979721475690203%	0.794553	1	Metabolic pathways	ko01100	952 out of 2207 43.1354780244676%	18051 out of 40930 44.102125580259%	0.832052	1	RNA degradation	ko03018	19 out of 1386 1.37085137085137%	671 out of 40930 1.63938431468361%	0.816953	1
Zeatin biosynthesis	ko00908	32 out of 4548 0.703605980650836%	311 out of 40930 0.759833862692402%	0.70451	1	D-Amino acid metabolism	ko00470	1 out of 3046 0.0328299409061064%	21 out of 40930 0.0513071096994869%	0.802977	1	Arachidonic acid metabolism	ko00590	5 out of 2207 0.226551880380607%	131 out of 40930 0.320058636696799%	0.840642	1	Protein export	ko03060	8 out of 1386 0.577200577200577%	314 out of 40930 0.767163449792328%	0.83708	1
Glycosphingolipid biosynthesis - ganglio series	ko00604	13 out of 4548 0.285839929639402%	131 out of 40930 0.320058636696799%	0.708046	1	Basal transcription factors	ko03022	16 out of 3046 0.525279054497702%	259 out of 40930 0.632787686293672%	0.813483	1	Vitamin B6 metabolism	ko00750	2 out of 2207 0.0906207521522429%	60 out of 40930 0.146591741998534%	0.84134	1	Cyanoamino acid metabolism	ko00460	16 out of 1386 1.15440115440115%	588 out of 40930 1.43659907158563%	0.845165	1
Aminoacyl-tRNA biosynthesis	ko00970	47 out of 4548 1.03342128408091%	453 out of 40930 1.10676765208893%	0.713542	1	SNARE interactions in vesicular transport	ko04130	11 out of 3046 0.36112934996717%	184 out of 40930 0.449548008795504%	0.81394	1	Fatty acid biosynthesis	ko00061	8 out of 2207 0.362483008608971%	200 out of 40930 0.488639139995114%	0.850217	1	Ether lipid metabolism	ko00565	3 out of 1386 0.216450216450216%	138 out of 40930 0.337161006596628%	0.85009	1
Metabolic pathways	ko01100	1988 out of 4548 43.7115215479332%	18051 out of 40930 44.102125580259%	0.718448	1	Fatty acid biosynthesis	ko00061	12 out of 3046 0.393959290873276%	200 out of 40930 0.488639139995114%	0.818295	1	Phenylalanine metabolism	ko00360	14 out of 2207 0.6343452650657%	334 out of 40930 0.81602736379184%	0.865916	1	Glycosylphosphatidylinositol (GPI)-anchor biosynthesis	ko00563	3 out of 1386 0.216450216450216%	140 out of 40930 0.34204739799658%	0.8568	1
Caffeine metabolism	ko00232	1 out of 4548 0.0219876868953386%	11 out of 40930 0.0268751526997312%	0.726334	1	Biotin metabolism	ko00780	5 out of 3046 0.164149704530532%	95 out of 40930 0.232103591497679%	0.843978	1	Ether lipid metabolism	ko00565	5 out of 2207 0.226551880380607%	138 out of 40930 0.337161006596628%	0.871075	1	Cutin, suberine and wax biosynthesis	ko00073	12 out of 1386 0.865800865800866%	464 out of 40930 1.13364280478866%	0.863897	1
Phenylalanine metabolism	ko00360	34 out of 4548 0.747581354441513%	334 out of 40930 0.81602736379184%	0.731722	1	Isoquinoline alkaloid biosynthesis	ko00950	16 out of 3046 0.525279054497702%	269 out of 40930 0.657219643293428%	0.855184	1	Linoleic acid metabolism	ko00591	3 out of 2207 0.135931128228364%	93 out of 40930 0.227217200097728%	0.883726	1	Biosynthesis of secondary metabolites	ko01110	354 out of 1386 25.5411255411255%	10975 out of 40930 26.8140728072319%	0.868729	1
Basal transcription factors	ko03022	26 out of 4548 0.571679859278804%	259 out of 40930 0.632787686293672%	0.737457	1	Aminoacyl-tRNA biosynthesis	ko00970	28 out of 3046 0.919238345370978%	453 out of 40930 1.10676765208893%	0.869955	1	Sesquiterpenoid and triterpenoid biosynthesis	ko00909	8 out of 2207 0.362483008608971%	210 out of 40930 0.513071096994869%	0.883894	1	2-Oxocarboxylic acid metabolism	ko01210	15 out of 1386 1.08225108225108%	570 out of 40930 1.39262154898607%	0.871176	1
Various types of N-glycan biosynthesis	ko00513	26 out of 4548 0.571679859278804%	260 out of 40930 0.635230881993648%	0.744422	1	Glycerolipid metabolism	ko00561	44 out of 3046 1.44451739986868%	695 out of 40930 1.69802101148302%	0.886594	1	Monoterpenoid biosynthesis	ko00902	3 out of 2207 0.135931128228364%	94 out of 40930 0.229660395797703%	0.888049	1	Phenylalanine metabolism	ko00360	8 out of 1386 0.577200577200577%	334 out of 40930 0.81602736379184%	0.880972	1
mRNA surveillance pathway	ko03015	70 out of 4548 1.5391380826737%	678 out of 40930 1.65648668458344%	0.761703	1	Tyrosine metabolism	ko00350	18 out of 3046 0.590938936309915%	311 out of 40930 0.759833862692402%	0.893051	1	Phosphatidylinositol signaling system	ko04070	22 out of 2207 0.996828273674672%	512 out of 40930 1.25091619838749%	0.888443	1	Isoquinoline alkaloid biosynthesis	ko00950	6 out of 1386 0.432900432900433%	269 out of 40930 0.657219643293428%	0.895598	1
Biosynthesis of unsaturated fatty acids	ko01040	19 out of 4548 0.417766051011434%	199 out of 40930 0.486195944295138%	0.790247	1	Fatty acid elongation	ko00062	20 out of 3046 0.656598818122127%	342 out of 40930 0.835572929391644%	0.894279	1	Peroxisome	ko04146	20 out of 2207 0.906207521522429%	473 out of 40930 1.15563156608844%	0.894032	1	Other glycan degradation	ko00511	11 out of 1386 0.793650793650794%	452 out of 40930 1.10432445638896%	0.9009	1
Other glycan degradation	ko00511	45 out of 4548 0.989445910290237%	452 out of 40930 1.10432445638896%	0.804229	1	Terpenoid backbone biosynthesis	ko00900	13 out of 3046 0.426789231779383%	239 out of 40930 0.583923772294161%	0.909474	1	Biosynthesis of various alkaloids	ko00996	1 out of 2207 0.0453103760761214%	42 out of 40930 0.102614219398974%	0.90263	1	Tyrosine metabolism	ko00350	7 out of 1386 0.505050505050505%	311 out of 40930 0.759833862692402%	0.904725	1
Tyrosine metabolism	ko00350	30 out of 4548 0.659630606860158%	311 out of 40930 0.759833862692402%	0.819298	1	Nitrogen metabolism	ko00910	14 out of 3046 0.459619172685489%	258 out of 40930 0.630344490593697%	0.917921	1	Plant hormone signal transduction	ko04075	125 out of 2207 5.66379700951518%	2584 out of 40930 6.31321768873687%	0.910621	1	Sesquiterpenoid and triterpenoid biosynthesis	ko00909	4 out of 1386 0.288600288600289%	210 out of 40930 0.513071096994869%	0.927767	1
Isoquinoline alkaloid biosynthesis	ko00950	24 out of 4548 0.527704485488127%	269 out of 40930 0.657219643293428%	0.896189	1	Sphingolipid metabolism	ko00600	17 out of 3046 0.558108995403808%	307 out of 40930 0.750061079892499%	0.922125	1	Biosynthesis of nucleotide sugars	ko01250	21 out of 2207 0.95151789759855%	504 out of 40930 1.23137063278769%	0.911653	1	Arachidonic acid metabolism	ko00590	2 out of 1386 0.144300144300144%	131 out of 40930 0.320058636696799%	0.938959	1
Selenocompound metabolism	ko00450	16 out of 4548 0.351802990325418%	190 out of 40930 0.464207182995358%	0.907171	1	Selenocompound metabolism	ko00450	9 out of 3046 0.295469468154957%	190 out of 40930 0.464207182995358%	0.949013	1	Tyrosine metabolism	ko00350	12 out of 2207 0.543724512913457%	311 out of 40930 0.759833862692402%	0.913679	1	ABC transporters	ko02010	11 out of 1386 0.793650793650794%	512 out of 40930 1.25091619838749%	0.961482	1
Glucosinolate biosynthesis	ko00966	6 out of 4548 0.131926121372032%	84 out of 40930 0.205228438797948%	0.916164	1	Glucosinolate biosynthesis	ko00966	3 out of 3046 0.0984898227183191%	84 out of 40930 0.205228438797948%	0.954437	1	Other types of O-glycan biosynthesis	ko00514	2 out of 2207 0.0906207521522429%	74 out of 40930 0.180796481798192%	0.913878	1	Photosynthesis - antenna proteins	ko00196	1 out of 1386 0.0721500721500721%	95 out of 40930 0.232103591497679%	0.96224	1
Phosphatidylinositol signaling system	ko04070	47 out of 4548 1.03342128408091%	512 out of 40930 1.25091619838749%	0.932401	1	Metabolic pathways	ko01100	1295 out of 3046 42.5147734734078%	18051 out of 40930 44.102125580259%	0.968176	1	Fatty acid metabolism	ko01212	16 out of 2207 0.724966017217943%	399 out of 40930 0.974835084290252%	0.914883	1	Autophagy - other	ko04136	2 out of 1386 0.144300144300144%	152 out of 40930 0.371365746396286%	0.96656	1
Cutin, suberine and wax biosynthesis	ko00073	41 out of 4548 0.901495162708883%	464 out of 40930 1.13364280478866%	0.953438	1	Homologous recombination	ko03440	45 out of 3046 1.47734734077479%	780 out of 40930 1.90569264598094%	0.972524	1	Isoflavonoid biosynthesis	ko00943	10 out of 2207 0.453103760761214%	279 out of 40930 0.681651600293184%	0.937405	1	Flavonoid biosynthesis	ko00941	14 out of 1386 1.01010101010101%	643 out of 40930 1.57097483508429%	0.972178	1
Glycerolipid metabolism	ko00561	62 out of 4548 1.36323658751099%	695 out of 40930 1.69802101148302%	0.974994	1	Monoterpenoid biosynthesis	ko00902	3 out of 3046 0.0984898227183191%	94 out of 40930 0.229660395797703%	0.974476	1	Inositol phosphate metabolism	ko00562	20 out of 2207 0.906207521522429%	503 out of 40930 1.22892743708771%	0.940469	1	Circadian rhythm - plant	ko04712	7 out of 1386 0.505050505050505%	406 out of 40930 0.991937454190081%	0.98508	1
Proteasome	ko03050	27 out of 4548 0.593667546174143%	359 out of 40930 0.877107256291229%	0.990979	1	Zeatin biosynthesis	ko00908	15 out of 3046 0.492449113591596%	311 out of 40930 0.759833862692402%	0.975564	1	Autophagy - other	ko04136	4 out of 2207 0.181241504304486%	152 out of 40930 0.371365746396286%	0.966646	1	Metabolic pathways	ko01100	570 out of 1386 41.1255411255411%	18051 out of 40930 44.102125580259%	0.989363	1
Fatty acid elongation	ko00062	25 out of 4548 0.549692172383465%	342 out of 40930 0.835572929391644%	0.992895	1	Taurine and hypotaurine metabolism	ko00430	3 out of 3046 0.0984898227183191%	96 out of 40930 0.234546787197655%	0.977318	1	Glycosphingolipid biosynthesis - ganglio series	ko00604	3 out of 2207 0.135931128228364%	131 out of 40930 0.320058636696799%	0.974794	1	Indole alkaloid biosynthesis	ko00901	2 out of 1386 0.144300144300144%	191 out of 40930 0.466650378695333%	0.98944	1
Stilbenoid, diarylheptanoid and gingerol biosynthesis	ko00945	23 out of 4548 0.505716798592788%	330 out of 40930 0.806254580991937%	0.995811	1	Diterpenoid biosynthesis	ko00904	12 out of 3046 0.393959290873276%	266 out of 40930 0.649890056193501%	0.980356	1	Protein export	ko03060	10 out of 2207 0.453103760761214%	314 out of 40930 0.767163449792328%	0.976274	1	Plant hormone signal transduction	ko04075	68 out of 1386 4.90620490620491%	2584 out of 40930 6.31321768873687%	0.989751	1
Cyanoamino acid metabolism	ko00460	46 out of 4548 1.01143359718558%	588 out of 40930 1.43659907158563%	0.996896	1	Glycosylphosphatidylinositol (GPI)-anchor biosynthesis	ko00563	5 out of 3046 0.164149704530532%	140 out of 40930 0.34204739799658%	0.981309	1	Steroid biosynthesis	ko00100	6 out of 2207 0.271862256456729%	223 out of 40930 0.544832641094552%	0.982524	1	Cysteine and methionine metabolism	ko00270	12 out of 1386 0.865800865800866%	630 out of 40930 1.53921329098461%	0.990538	1
Citrate cycle (TCA cycle)	ko00020	36 out of 4548 0.79155672823219%	489 out of 40930 1.19472269728805%	0.997938	1	mRNA surveillance pathway	ko03015	37 out of 3046 1.21470781352594%	678 out of 40930 1.65648668458344%	0.983648	1	Stilbenoid, diarylheptanoid and gingerol biosynthesis	ko00945	10 out of 2207 0.453103760761214%	330 out of 40930 0.806254580991937%	0.985251	1	Pentose and glucuronate interconversions	ko00040	18 out of 1386 1.2987012987013%	872 out of 40930 2.1304666503787%	0.992326	1
Phenylpropanoid biosynthesis	ko00940	138 out of 4548 3.03430079155673%	1547 out of 40930 3.7796237478622%	0.998215	1	Citrate cycle (TCA cycle)	ko00020	25 out of 3046 0.820748522652659%	489 out of 40930 1.19472269728805%	0.984411	1	Cutin, suberine and wax biosynthesis	ko00073	15 out of 2207 0.679655641141822%	464 out of 40930 1.13364280478866%	0.989742	1	Starch and sucrose metabolism	ko00500	37 out of 1386 2.66955266955267%	1603 out of 40930 3.91644270706084%	0.99575	1
Diterpenoid biosynthesis	ko00904	16 out of 4548 0.351802990325418%	266 out of 40930 0.649890056193501%	0.998496	1	Sesquiterpenoid and triterpenoid biosynthesis	ko00909	7 out of 3046 0.229809586342745%	210 out of 40930 0.513071096994869%	0.996077	1	Isoquinoline alkaloid biosynthesis	ko00950	7 out of 2207 0.31717263253285%	269 out of 40930 0.657219643293428%	0.991187	1	Stilbenoid, diarylheptanoid and gingerol biosynthesis	ko00945	4 out of 1386 0.288600288600289%	330 out of 40930 0.806254580991937%	0.99623	1
Photosynthesis - antenna proteins	ko00196	3 out of 4548 0.0659630606860158%	95 out of 40930 0.232103591497679%	0.998869	1	Phenylpropanoid biosynthesis	ko00940	89 out of 3046 2.92186474064347%	1547 out of 40930 3.7796237478622%	0.996694	1	Other glycan degradation	ko00511	14 out of 2207 0.6343452650657%	452 out of 40930 1.10432445638896%	0.992675	1	Betalain biosynthesis	ko00965	2 out of 1386 0.144300144300144%	225 out of 40930 0.549719032494503%	0.99624	1
2-Oxocarboxylic acid metabolism	ko01210	41 out of 4548 0.901495162708883%	570 out of 40930 1.39262154898607%	0.999396	1	Indole alkaloid biosynthesis	ko00901	5 out of 3046 0.164149704530532%	191 out of 40930 0.466650378695333%	0.998878	1	Aminoacyl-tRNA biosynthesis	ko00970	14 out of 2207 0.6343452650657%	453 out of 40930 1.10676765208893%	0.992881	1	Fatty acid elongation	ko00062	4 out of 1386 0.288600288600289%	342 out of 40930 0.835572929391644%	0.997257	1
Sesquiterpenoid and triterpenoid biosynthesis	ko00909	10 out of 4548 0.219876868953386%	210 out of 40930 0.513071096994869%	0.999635	1	2-Oxocarboxylic acid metabolism	ko01210	24 out of 3046 0.787918581746553%	570 out of 40930 1.39262154898607%	0.999469	1	Zeatin biosynthesis	ko00908	7 out of 2207 0.31717263253285%	311 out of 40930 0.759833862692402%	0.99809	1	Phenylpropanoid biosynthesis	ko00940	26 out of 1386 1.87590187590188%	1547 out of 40930 3.7796237478622%	0.999988	1
Monoterpenoid biosynthesis	ko00902	2 out of 4548 0.0439753737906772%	94 out of 40930 0.229660395797703%	0.999804	1	Cyanoamino acid metabolism	ko00460	25 out of 3046 0.820748522652659%	588 out of 40930 1.43659907158563%	0.999477	1	Selenocompound metabolism	ko00450	3 out of 2207 0.135931128228364%	190 out of 40930 0.464207182995358%	0.998159	1	Plant-pathogen interaction	ko04626	108 out of 1386 7.79220779220779%	4669 out of 40930 11.4072807231859%	0.999998	1
Taurine and hypotaurine metabolism	ko00430	2 out of 4548 0.0439753737906772%	96 out of 40930 0.234546787197655%	0.999842	1	Stilbenoid, diarylheptanoid and gingerol biosynthesis	ko00945	11 out of 3046 0.36112934996717%	330 out of 40930 0.806254580991937%	0.99948	1	Indole alkaloid biosynthesis	ko00901	2 out of 2207 0.0906207521522429%	191 out of 40930 0.466650378695333%	0.999706	1	Oxidative phosphorylation	ko00190	16 out of 1386 1.15440115440115%	1229 out of 40930 3.00268751526997%	0.999999	1
Betalain biosynthesis	ko00965	9 out of 4548 0.197889182058047%	225 out of 40930 0.549719032494503%	0.999965	1	Proteasome	ko03050	12 out of 3046 0.393959290873276%	359 out of 40930 0.877107256291229%	0.999668	1	Pentose and glucuronate interconversions	ko00040	26 out of 2207 1.17806977797916%	872 out of 40930 2.1304666503787%	0.99979	1	Photosynthesis	ko00195	4 out of 1386 0.288600288600289%	705 out of 40930 1.72245296848278%	1	1
Indole alkaloid biosynthesis	ko00901	5 out of 4548 0.109938434476693%	191 out of 40930 0.466650378695333%	0.999997	1	Plant-pathogen interaction	ko04626	287 out of 3046 9.42219304005253%	4669 out of 40930 11.4072807231859%	0.999891	1	Fatty acid elongation	ko00062	6 out of 2207 0.271862256456729%	342 out of 40930 0.835572929391644%	0.999831	1
Tryptophan metabolism	ko00380	33 out of 4548 0.725593667546174%	657 out of 40930 1.60517957488395%	1	1	Tryptophan metabolism	ko00380	26 out of 3046 0.853578463558766%	657 out of 40930 1.60517957488395%	0.99993	1	Betalain biosynthesis	ko00965	2 out of 2207 0.0906207521522429%	225 out of 40930 0.549719032494503%	0.999949	1
Pentose and glucuronate interconversions	ko00040	50 out of 4548 1.09938434476693%	872 out of 40930 2.1304666503787%	1	1	Pentose and glucuronate interconversions	ko00040	37 out of 3046 1.21470781352594%	872 out of 40930 2.1304666503787%	0.999967	1	Oxidative phosphorylation	ko00190	31 out of 2207 1.40462165835976%	1229 out of 40930 3.00268751526997%	1	1
Oxidative phosphorylation	ko00190	77 out of 4548 1.69305189094107%	1229 out of 40930 3.00268751526997%	1	1	Betalain biosynthesis	ko00965	3 out of 3046 0.0984898227183191%	225 out of 40930 0.549719032494503%	0.999995	1	Photosynthesis	ko00195	9 out of 2207 0.407793384685093%	705 out of 40930 1.72245296848278%	1	1
Photosynthesis	ko00195	29 out of 4548 0.63764291996482%	705 out of 40930 1.72245296848278%	1	1	Photosynthesis	ko00195	15 out of 3046 0.492449113591596%	705 out of 40930 1.72245296848278%	1	1	Plant-pathogen interaction	ko04626	162 out of 2207 7.34028092433167%	4669 out of 40930 11.4072807231859%	1	1
Plant-pathogen interaction	ko04626	368 out of 4548 8.09146877748461%	4669 out of 40930 11.4072807231859%	1	1	Oxidative phosphorylation	ko00190	36 out of 3046 1.18187787261983%	1229 out of 40930 3.00268751526997%	1	1
Ribosome	ko03010	82 out of 4548 1.80299032541777%	1717 out of 40930 4.19496701685805%	1	1	Ribosome	ko03010	40 out of 3046 1.31319763624425%	1717 out of 40930 4.19496701685805%	1	1
