# Supplementary material for: Integrated Metabolome and Transcriptome Analyses Reveal Amino Acid Biosynthesis Mechanisms during the Physiological Maturity of Grains in Yunnan Hulled Wheat (Triticum aestivum ssp. yunnanense King)
Source: Int J Mol Sci. 2023 Aug 30;24(17):13475. doi: 10.3390/ijms241713475 (PMC10487551; doi:10.3390/ijms241713475)
Supplement: Supplementary file 1 [file ijms-24-13475-s001.zip › Table S12.xlsx]

## Sheet: Table S12
Table S12. Differential expression genes related to the accumulation of amino acids and derivatives identified in the amino acid biosynthesis pathways among four comparative groups
Index	DWG_vs_DMG	YWG_vs_YMG	DWG_vs_YWG	DMG_vs_YMG	DWG-1	DWG-2	DWG-3	DWG(FPKM)	DMG-1	DMG-2	DMG-3	DMG(FPKM)	YWG-1	YWG-2	YWG-3	YWG(FPKM)	YMG-1	YMG-2	YMG-3	YMG(FPKM)	chr	start	end	strand	gene_name	gene_description	KEGG	KEGG pathway	NR	Swissprot	Tremble	KOG	GO	Pfam	TF-Family	TF-Category	TF-Classification
TraesCS7D02G474700	TRUE	FALSE	FALSE	FALSE	4.13	3.87	4.07	4.02333	1.59	1.82	1.97	1.79333	2.8	3.39	3.57	3.25333	1.82	3.34	1.58	2.24667	7D	587069445	587072872	+	TraesCS7D02G474700	Serine/threonine protein kinase 1 [Source:UniProtKB/TrEMBL%3BAcc:A9RAA9]	K01968 3-methylcrotonyl-CoA carboxylase alpha subunit [EC:6.4.1.4] | (RefSeq) LOW QUALITY PROTEIN: methylcrotonoyl-CoA carboxylase subunit alpha, mitochondrial (A)	ko00280: Valine, leucine and isoleucine degradation; ko01100: Metabolic pathways	serine/threonine protein kinase 1 [Triticum aestivum]	STY13_ARATH RecName: Full=Serine/threonine-protein kinase STY13 {ECO:0000305}; EC=2.7.11.1 {ECO:0000269|PubMed:16429265}; AltName: Full=AtSTYPK {ECO:0000303|PubMed:17291444}; AltName: Full=Serine/threonine/tyrosine-protein kinase 13 {ECO:0000303|PubMed:16429265};	A9RAA9_WHEAT SubName: Full=Serine/threonine protein kinase 1 {ECO:0000313|EMBL:ABC54583.1, ECO:0000313|EnsemblPlants:TraesCS7D02G474700.1};	At2g24360	GO:0005737,cytoplasm; GO:0005886,plasma membrane; GO:0005524,ATP binding; GO:0004672,protein kinase activity; GO:0106310,protein serine kinase activity; GO:0004674,protein serine/threonine kinase activity; GO:0004712,protein serine/threonine/tyrosine kinase activity; GO:0106311,protein threonine kinase activity; GO:0004713,protein tyrosine kinase activity; GO:0006468,protein phosphorylation; GO:0…	PF07714.17:Protein tyrosine kinase	--	--	--
TraesCS7D02G396300	TRUE	FALSE	FALSE	FALSE	11.98	10.34	11.03	11.1167	32.82	30.95	21.12	28.2967	19.23	17.92	15.19	17.4467	35.56	27.35	20.27	27.7267	7D	510869476	510873535	+	TraesCS7D02G396300	--	K00948 ribose-phosphate pyrophosphokinase [EC:2.7.6.1] | (RefSeq) ribose-phosphate pyrophosphokinase 2, chloroplastic-like (A)	ko00030: Pentose phosphate pathway; ko00230: Purine metabolism; ko01100: Metabolic pathways; ko01110: Biosynthesis of secondary metabolites; ko01200: Carbon metabolism; ko01230: Biosynthesis of amino acids	ribose-phosphate pyrophosphokinase 2, chloroplastic-like [Aegilops tauschii subsp. tauschii]	KPRS2_ORYSJ RecName: Full=Ribose-phosphate pyrophosphokinase 2, chloroplastic; EC=2.7.6.1; AltName: Full=Phosphoribosyl pyrophosphate synthase 2; Flags: Precursor;	A0A453SKS8_AEGTS RecName: Full=Ribose-phosphate diphosphokinase {ECO:0000256|ARBA:ARBA00013247}; EC=2.7.6.1 {ECO:0000256|ARBA:ARBA00013247};	At2g35390	GO:0009507,chloroplast; GO:0005737,cytoplasm; GO:0002189,ribose phosphate diphosphokinase complex; GO:0005524,ATP binding; GO:0016301,kinase activity; GO:0000287,magnesium ion binding; GO:0004749,ribose phosphate diphosphokinase activity; GO:0006015,5-phosphoribose 1-diphosphate biosynthetic process; GO:0009116,nucleoside metabolic process; GO:0006164,purine nucleotide biosynthetic process; GO:00…	PF13793.6:N-terminal domain of ribose phosphate pyrophosphokinase	--	--	--
TraesCS7D02G382200	TRUE	FALSE	FALSE	FALSE	27.85	21.74	17.44	22.3433	65.96	60.77	53.36	60.03	36.34	28.27	33.31	32.64	77.15	52.38	51.43	60.32	7D	495874712	495877887	-	TraesCS7D02G382200	--	K00873 pyruvate kinase [EC:2.7.1.40] | (RefSeq) uncharacterized protein LOC118033103 isoform X1 (A)	ko00010: Glycolysis / Gluconeogenesis; ko00620: Pyruvate metabolism; ko01100: Metabolic pathways; ko01110: Biosynthesis of secondary metabolites; ko01200: Carbon metabolism; ko01230: Biosynthesis of amino acids	uncharacterized protein LOC109784504 [Aegilops tauschii subsp. tauschii]	--	A0A3B6TNN9_WHEAT SubName: Full=Uncharacterized protein {ECO:0000313|EnsemblPlants:TraesCS7D02G382200.1};	--	GO:0016021,integral component of membrane; GO:0005575,cellular_component; GO:0016020,membrane; GO:0031224,intrinsic component of membrane; GO:0110165,cellular anatomical entity	--	--	--	--
TraesCS7D02G223000	TRUE	TRUE	TRUE	FALSE	4.19	4.42	4.08	4.23	0.6	0.37	1.7	0.89	1.59	1.63	2.17	1.79667	0.91	0.52	0.76	0.73	7D	184189716	184194946	+	TraesCS7D02G223000	Aconitate hydratase [Source:UniProtKB/TrEMBL%3BAcc:A0A341YWE3]	K01681 aconitate hydratase [EC:4.2.1.3] | (RefSeq) putative aconitate hydratase, cytoplasmic (A)	ko00020: Citrate cycle (TCA cycle); ko00630: Glyoxylate and dicarboxylate metabolism; ko01100: Metabolic pathways; ko01110: Biosynthesis of secondary metabolites; ko01200: Carbon metabolism; ko01210: 2-Oxocarboxylic acid metabolism; ko01230: Biosynthesis of amino acids	putative aconitate hydratase, cytoplasmic [Aegilops tauschii subsp. tauschii]	ACOC_ORYSJ RecName: Full=Putative aconitate hydratase, cytoplasmic; Short=Aconitase; EC=4.2.1.3; AltName: Full=Citrate hydro-lyase;	A0A453RED8_AEGTS RecName: Full=Aconitate hydratase {ECO:0000256|RuleBase:RU361275}; Short=Aconitase {ECO:0000256|RuleBase:RU361275}; EC=4.2.1.3 {ECO:0000256|RuleBase:RU361275};	At4g35830	GO:0005829,cytosol; GO:0005739,mitochondrion; GO:0051539,4 iron, 4 sulfur cluster binding; GO:0003994,aconitate hydratase activity; GO:0047780,citrate dehydratase activity; GO:0046872,metal ion binding; GO:0006101,citrate metabolic process; GO:0006097,glyoxylate cycle; GO:0006099,tricarboxylic acid cycle; GO:0003674,molecular_function; GO:0005488,binding; GO:0051536,iron-sulfur cluster binding; G…	PF00330.20:Aconitase family (aconitate hydratase)	--	--	--
TraesCS7D02G180600	TRUE	FALSE	FALSE	FALSE	9.4	8.95	6.81	8.38667	1.97	3.08	0.29	1.78	13.01	2.94	6.38	7.44333	8.48	10.69	2.46	7.21	7D	133827124	133828490	+	TraesCS7D02G180600	--	K00020 3-hydroxyisobutyrate dehydrogenase [EC:1.1.1.31] | (GenBank) 6-phosphogluconate dehydrogenase-like protein (A)	ko00280: Valine, leucine and isoleucine degradation; ko01100: Metabolic pathways	protein EXORDIUM-like [Aegilops tauschii subsp. tauschii]	PHI1_TOBAC RecName: Full=Protein PHOSPHATE-INDUCED 1 {ECO:0000303|PubMed:10189698}; Flags: Precursor;	A0A453R506_AEGTS SubName: Full=Uncharacterized protein {ECO:0000313|EnsemblPlants:AET7Gv20462600.1};	At4g08950	GO:0048046,apoplast; GO:0005615,extracellular space; GO:0005575,cellular_component; GO:0005576,extracellular region; GO:0110165,cellular anatomical entity	PF04674.12:Phosphate-induced protein 1 conserved region	--	--	--
TraesCS7D02G170500	TRUE	TRUE	FALSE	FALSE	3.16	2.86	4.28	3.43333	7.49	8.45	7.43	7.79	1.9	2.61	3.13	2.54667	6.45	4.87	5.61	5.64333	7D	123049949	123055820	+	TraesCS7D02G170500	Aminoacylase [Source:UniProtKB/TrEMBL%3BAcc:A0A1D6D5G5]	K14677 aminoacylase [EC:3.5.1.14] | (RefSeq) aminoacylase-1-like (A)	ko00220: Arginine biosynthesis; ko01100: Metabolic pathways; ko01110: Biosynthesis of secondary metabolites; ko01210: 2-Oxocarboxylic acid metabolism; ko01230: Biosynthesis of amino acids	aminoacylase-1-like [Aegilops tauschii subsp. tauschii]	--	A0A453R371_AEGTS RecName: Full=N-acyl-L-amino-acid amidohydrolase {ECO:0000256|ARBA:ARBA00019885}; EC=3.5.1.14 {ECO:0000256|ARBA:ARBA00011913};	At1g44180	GO:0005737,cytoplasm; GO:0004046,aminoacylase activity; GO:0006520,cellular amino acid metabolic process; GO:0003674,molecular_function; GO:0003824,catalytic activity; GO:0016787,hydrolase activity; GO:0016810,hydrolase activity, acting on carbon-nitrogen (but not peptide) bonds; GO:0016811,hydrolase activity, acting on carbon-nitrogen (but not peptide) bonds, in linear amides; GO:0006082,organic…	PF01546.28:Peptidase family M20/M25/M40	--	--	--
TraesCS7D02G096700	TRUE	FALSE	FALSE	FALSE	1.52	0.85	0.73	1.03333	2.96	2.61	3.05	2.87333	1.49	3.5	2.56	2.51667	2.06	4.71	5.1	3.95667	7D	58642166	58644819	+	TraesCS7D02G096700	--	K01738 cysteine synthase [EC:2.5.1.47] | (RefSeq) cysteine synthase-like (A)	ko00270: Cysteine and methionine metabolism; ko00920: Sulfur metabolism; ko01100: Metabolic pathways; ko01110: Biosynthesis of secondary metabolites; ko01200: Carbon metabolism; ko01230: Biosynthesis of amino acids	cysteine synthase-like [Aegilops tauschii subsp. tauschii]	CYSKP_SPIOL RecName: Full=Cysteine synthase, chloroplastic/chromoplastic; EC=2.5.1.47; AltName: Full=CSase B; Short=CS-B; AltName: Full=O-acetylserine (thiol)-lyase; AltName: Full=O-acetylserine sulfhydrylase; AltName: Full=OAS-TL B; Flags: Precursor;	A0A3B6TKH1_WHEAT RecName: Full=PALP domain-containing protein {ECO:0000259|Pfam:PF00291};	At2g43750	GO:0009570,chloroplast stroma; GO:0009509,chromoplast; GO:0004124,cysteine synthase activity; GO:0006535,cysteine biosynthetic process from serine; GO:0003674,molecular_function; GO:0003824,catalytic activity; GO:0016740,transferase activity; GO:0016765,transferase activity, transferring alkyl or aryl (other than methyl) groups; GO:0000096,sulfur amino acid metabolic process; GO:0000097,sulfur am…	PF00291.25:Pyridoxal-phosphate dependent enzyme	--	--	--
TraesCS7B02G308800	TRUE	TRUE	FALSE	FALSE	2.46	2.66	4.05	3.05667	7.12	6.83	7.12	7.02333	3.33	3.51	3.73	3.52333	10.41	5.96	7.23	7.86667	7B	552665323	552666807	+	TraesCS7B02G308800	--	K15227 arogenate dehydrogenase (NADP+), plant [EC:1.3.1.78] | (RefSeq) arogenate dehydrogenase 2, chloroplastic-like (A)	ko00400: Phenylalanine, tyrosine and tryptophan biosynthesis; ko01100: Metabolic pathways; ko01110: Biosynthesis of secondary metabolites; ko01230: Biosynthesis of amino acids	arogenate dehydrogenase 2, chloroplastic-like [Aegilops tauschii subsp. tauschii]	TYRA2_ARATH RecName: Full=Arogenate dehydrogenase 2, chloroplastic; EC=1.3.1.78; AltName: Full=TyrAAT2; Flags: Precursor;	A0A453SM68_AEGTS RecName: Full=Prephenate/arogenate dehydrogenase domain-containing protein {ECO:0000259|PROSITE:PS51176};	At1g15710	GO:0009507,chloroplast; GO:0033730,arogenate dehydrogenase (NADP+) activity; GO:0008977,prephenate dehydrogenase (NAD+) activity; GO:0004665,prephenate dehydrogenase (NADP+) activity; GO:0008652,cellular amino acid biosynthetic process; GO:0006571,tyrosine biosynthetic process; GO:0003674,molecular_function; GO:0003824,catalytic activity; GO:0016491,oxidoreductase activity; GO:0016627,oxidoreduct…	PF02153.17:Prephenate dehydrogenase	--	--	--
TraesCS7B02G294800	TRUE	FALSE	FALSE	FALSE	6.76	7.5	9.3	7.85333	1.78	4.88	3.68	3.44667	4.48	4.02	6.14	4.88	2.74	3.33	3.89	3.32	7B	531658082	531661215	+	TraesCS7B02G294800	Tryptophan synthase beta chain [Source:Projected from Arabidopsis thaliana (AT5G38530) UniProtKB/TrEMBL%3BAcc:Q9FFW8]	K06001 tryptophan synthase beta chain [EC:4.2.1.20] | (RefSeq) tryptophan synthase beta chain 2-like isoform X1 (A)	ko00260: Glycine, serine and threonine metabolism; ko00400: Phenylalanine, tyrosine and tryptophan biosynthesis; ko01100: Metabolic pathways; ko01110: Biosynthesis of secondary metabolites; ko01230: Biosynthesis of amino acids	uncharacterized protein LOC109767967 isoform X1 [Aegilops tauschii subsp. tauschii]	TRPB1_ARATH RecName: Full=Tryptophan synthase beta chain 1, chloroplastic; EC=4.2.1.20; Flags: Precursor;	A0A3B6SGU5_WHEAT RecName: Full=PALP domain-containing protein {ECO:0000259|Pfam:PF00291};	At5g38530	GO:0009507,chloroplast; GO:0009570,chloroplast stroma; GO:0005737,cytoplasm; GO:0005886,plasma membrane; GO:0019904,protein domain specific binding; GO:0004834,tryptophan synthase activity; GO:0009684,indoleacetic acid biosynthetic process; GO:0006979,response to oxidative stress; GO:0000162,tryptophan biosynthetic process; GO:0003674,molecular_function; GO:0005488,binding; GO:0005515,protein bin…	PF00291.25:Pyridoxal-phosphate dependent enzyme	--	--	--
TraesCS7B02G084300	TRUE	FALSE	FALSE	TRUE	13.55	14.23	15.94	14.5733	4.72	4.62	1.22	3.52	21.53	9.52	11.64	14.23	16.49	25.38	5.45	15.7733	7B	95045458	95046429	-	TraesCS7B02G084300	--	K00020 3-hydroxyisobutyrate dehydrogenase [EC:1.1.1.31] | (GenBank) 6-phosphogluconate dehydrogenase-like protein (A)	ko00280: Valine, leucine and isoleucine degradation; ko01100: Metabolic pathways	protein EXORDIUM-like [Aegilops tauschii subsp. tauschii]	PHI1_TOBAC RecName: Full=Protein PHOSPHATE-INDUCED 1 {ECO:0000303|PubMed:10189698}; Flags: Precursor;	A0A446Y701_TRITD SubName: Full=Uncharacterized protein {ECO:0000313|EMBL:VAI84301.1};	At4g08950	GO:0048046,apoplast; GO:0005615,extracellular space; GO:0005575,cellular_component; GO:0005576,extracellular region; GO:0110165,cellular anatomical entity	PF04674.12:Phosphate-induced protein 1 conserved region	--	--	--
TraesCS7A02G505800	TRUE	FALSE	FALSE	FALSE	3.72	4.16	2.66	3.51333	5.65	6.9	12.18	8.24333	2.39	0.62	2.43	1.81333	4.67	0.97	4.2	3.28	7A	693464833	693472509	+	TraesCS7A02G505800	--	K01814 phosphoribosylformimino-5-aminoimidazole carboxamide ribotide isomerase [EC:5.3.1.16] | (RefSeq) uncharacterized protein LOC123160288 (A)	ko00340: Histidine metabolism; ko01100: Metabolic pathways; ko01110: Biosynthesis of secondary metabolites; ko01230: Biosynthesis of amino acids	uncharacterized protein LOC109751552 [Aegilops tauschii subsp. tauschii]	--	A0A446XX53_TRITD RecName: Full=WIYLD domain-containing protein {ECO:0000259|Pfam:PF10440};	--	GO:0018024,histone-lysine N-methyltransferase activity; GO:0003674,molecular_function; GO:0003824,catalytic activity; GO:0008168,methyltransferase activity; GO:0008170,N-methyltransferase activity; GO:0008276,protein methyltransferase activity; GO:0008757,S-adenosylmethionine-dependent methyltransferase activity; GO:0016278,lysine N-methyltransferase activity; GO:0016279,protein-lysine N-methyltr…	PF10440.9:Ubiquitin-binding WIYLD domain	--	--	--
TraesCS7A02G488200	TRUE	FALSE	FALSE	FALSE	10.76	9.09	8.43	9.42667	4.06	5.71	3.35	4.37333	10.03	10.54	9.07	9.88	5.77	10.09	5.67	7.17667	7A	678580020	678582531	+	TraesCS7A02G488200	--	K01968 3-methylcrotonyl-CoA carboxylase alpha subunit [EC:6.4.1.4] | (RefSeq) LOW QUALITY PROTEIN: methylcrotonoyl-CoA carboxylase subunit alpha, mitochondrial (A)	ko00280: Valine, leucine and isoleucine degradation; ko01100: Metabolic pathways	Serine/threonine-protein kinase HT1 [Triticum urartu]	STY13_ARATH RecName: Full=Serine/threonine-protein kinase STY13 {ECO:0000305}; EC=2.7.11.1 {ECO:0000269|PubMed:16429265}; AltName: Full=AtSTYPK {ECO:0000303|PubMed:17291444}; AltName: Full=Serine/threonine/tyrosine-protein kinase 13 {ECO:0000303|PubMed:16429265};	A0A446XW44_TRITD RecName: Full=Protein kinase domain-containing protein {ECO:0000259|PROSITE:PS50011};	At2g24360	GO:0005737,cytoplasm; GO:0005886,plasma membrane; GO:0005524,ATP binding; GO:0004672,protein kinase activity; GO:0106310,protein serine kinase activity; GO:0004674,protein serine/threonine kinase activity; GO:0004712,protein serine/threonine/tyrosine kinase activity; GO:0106311,protein threonine kinase activity; GO:0004713,protein tyrosine kinase activity; GO:0006468,protein phosphorylation; GO:0…	PF07714.17:Protein tyrosine kinase	--	--	--
TraesCS7A02G409100	TRUE	TRUE	FALSE	FALSE	1.27	2.33	2.9	2.16667	6.4	7.65	2.61	5.55333	3.57	5.27	3.68	4.17333	11.51	8.85	9.93	10.0967	7A	595198300	595200043	+	TraesCS7A02G409100	--	K15227 arogenate dehydrogenase (NADP+), plant [EC:1.3.1.78] | (RefSeq) arogenate dehydrogenase 2, chloroplastic-like (A)	ko00400: Phenylalanine, tyrosine and tryptophan biosynthesis; ko01100: Metabolic pathways; ko01110: Biosynthesis of secondary metabolites; ko01230: Biosynthesis of amino acids	arogenate dehydrogenase 2, chloroplastic-like [Aegilops tauschii subsp. tauschii]	TYRA2_ARATH RecName: Full=Arogenate dehydrogenase 2, chloroplastic; EC=1.3.1.78; AltName: Full=TyrAAT2; Flags: Precursor;	A0A3B6RNM1_WHEAT RecName: Full=Prephenate/arogenate dehydrogenase domain-containing protein {ECO:0000259|PROSITE:PS51176};	At1g15710	GO:0009507,chloroplast; GO:0033730,arogenate dehydrogenase (NADP+) activity; GO:0008977,prephenate dehydrogenase (NAD+) activity; GO:0004665,prephenate dehydrogenase (NADP+) activity; GO:0008652,cellular amino acid biosynthetic process; GO:0006571,tyrosine biosynthetic process; GO:0003674,molecular_function; GO:0003824,catalytic activity; GO:0016491,oxidoreductase activity; GO:0016627,oxidoreduct…	PF02153.17:Prephenate dehydrogenase	--	--	--
TraesCS7A02G385600	TRUE	TRUE	FALSE	FALSE	100.92	94.25	89.27	94.8133	346.05	312.85	222.86	293.92	112.46	91.28	120.7	108.147	353.88	229.17	217.86	266.97	7A	561618850	561621814	-	TraesCS7A02G385600	--	K00873 pyruvate kinase [EC:2.7.1.40] | (RefSeq) uncharacterized protein LOC118033103 isoform X1 (A)	ko00010: Glycolysis / Gluconeogenesis; ko00620: Pyruvate metabolism; ko01100: Metabolic pathways; ko01110: Biosynthesis of secondary metabolites; ko01200: Carbon metabolism; ko01230: Biosynthesis of amino acids	uncharacterized protein LOC109784504 [Aegilops tauschii subsp. tauschii]	--	A0A453SGZ9_AEGTS SubName: Full=Uncharacterized protein {ECO:0000313|EnsemblPlants:AET7Gv20942600.2};	At5g54540	GO:0016021,integral component of membrane; GO:0005575,cellular_component; GO:0016020,membrane; GO:0031224,intrinsic component of membrane; GO:0110165,cellular anatomical entity	--	--	--	--
TraesCS7A02G370500	TRUE	FALSE	FALSE	FALSE	4.04	3.28	2.93	3.41667	1.55	2.54	1.14	1.74333	3.36	5.1	3.48	3.98	2.22	2.34	2.76	2.44	7A	543774140	543781254	+	TraesCS7A02G370500	--	K05605 3-hydroxyisobutyryl-CoA hydrolase [EC:3.1.2.4] | (RefSeq) 3-hydroxyisobutyryl-CoA hydrolase-like protein 3, mitochondrial isoform X1 (A)	ko00280: Valine, leucine and isoleucine degradation; ko00410: beta-Alanine metabolism; ko00640: Propanoate metabolism; ko01100: Metabolic pathways; ko01200: Carbon metabolism	3-hydroxyisobutyryl-CoA hydrolase-like protein 3, mitochondrial isoform X2 [Aegilops tauschii subsp. tauschii]	HIBC6_ARATH RecName: Full=3-hydroxyisobutyryl-CoA hydrolase-like protein 3, mitochondrial; EC=3.1.2.-; Flags: Precursor;	A0A446XNG5_TRITD SubName: Full=Uncharacterized protein {ECO:0000313|EMBL:VAI77821.1};	At4g13360	GO:0005829,cytosol; GO:0005739,mitochondrion; GO:0003860,3-hydroxyisobutyryl-CoA hydrolase activity; GO:0006574,valine catabolic process; GO:0003674,molecular_function; GO:0003824,catalytic activity; GO:0016289,CoA hydrolase activity; GO:0016787,hydrolase activity; GO:0016788,hydrolase activity, acting on ester bonds; GO:0016790,thiolester hydrolase activity; GO:0006082,organic acid metabolic pro…	PF16113.5:Enoyl-CoA hydratase/isomerase	--	--	--
TraesCS7A02G345600	TRUE	FALSE	FALSE	FALSE	5.35	9.4	8.88	7.87667	2.13	2.36	2.49	2.32667	7.32	3.82	5.36	5.5	3.36	2.69	2.73	2.92667	7A	507819322	507821627	-	TraesCS7A02G345600	--	K15227 arogenate dehydrogenase (NADP+), plant [EC:1.3.1.78] | (RefSeq) arogenate dehydrogenase 2, chloroplastic-like (A)	ko00400: Phenylalanine, tyrosine and tryptophan biosynthesis; ko01100: Metabolic pathways; ko01110: Biosynthesis of secondary metabolites; ko01230: Biosynthesis of amino acids	arogenate dehydrogenase 2, chloroplastic-like [Aegilops tauschii subsp. tauschii]	TYRA2_ARATH RecName: Full=Arogenate dehydrogenase 2, chloroplastic; EC=1.3.1.78; AltName: Full=TyrAAT2; Flags: Precursor;	A0A3B6RLH5_WHEAT RecName: Full=Prephenate/arogenate dehydrogenase domain-containing protein {ECO:0000259|PROSITE:PS51176};	At1g15710	GO:0009507,chloroplast; GO:0033730,arogenate dehydrogenase (NADP+) activity; GO:0008977,prephenate dehydrogenase (NAD+) activity; GO:0004665,prephenate dehydrogenase (NADP+) activity; GO:0008652,cellular amino acid biosynthetic process; GO:0006571,tyrosine biosynthetic process; GO:0003674,molecular_function; GO:0003824,catalytic activity; GO:0016491,oxidoreductase activity; GO:0016627,oxidoreduct…	PF02153.17:Prephenate dehydrogenase	--	--	--
TraesCS7A02G219100	TRUE	FALSE	FALSE	FALSE	7.78	9.26	10.05	9.03	2.27	1.96	5.52	3.25	14.74	17.52	12.32	14.86	5.34	11.66	9.19	8.73	7A	186522391	186531033	-	TraesCS7A02G219100	Aconitate hydratase [Source:UniProtKB/TrEMBL%3BAcc:A0A341Y9K5]	K01681 aconitate hydratase [EC:4.2.1.3] | (RefSeq) aconitate hydratase, cytoplasmic-like (A)	ko00020: Citrate cycle (TCA cycle); ko00630: Glyoxylate and dicarboxylate metabolism; ko01100: Metabolic pathways; ko01110: Biosynthesis of secondary metabolites; ko01200: Carbon metabolism; ko01210: 2-Oxocarboxylic acid metabolism; ko01230: Biosynthesis of amino acids	putative aconitate hydratase, cytoplasmic [Aegilops tauschii subsp. tauschii]	ACOC_CUCMA RecName: Full=Aconitate hydratase, cytoplasmic; Short=Aconitase; EC=4.2.1.3; AltName: Full=Citrate hydro-lyase;	A0A3B6RGW5_WHEAT RecName: Full=Aconitate hydratase {ECO:0000256|RuleBase:RU361275}; Short=Aconitase {ECO:0000256|RuleBase:RU361275}; EC=4.2.1.3 {ECO:0000256|RuleBase:RU361275};	At4g35830	GO:0005737,cytoplasm; GO:0051539,4 iron, 4 sulfur cluster binding; GO:0003994,aconitate hydratase activity; GO:0047780,citrate dehydratase activity; GO:0046872,metal ion binding; GO:0006097,glyoxylate cycle; GO:0003674,molecular_function; GO:0005488,binding; GO:0051536,iron-sulfur cluster binding; GO:0051540,metal cluster binding; GO:0003824,catalytic activity; GO:0016829,lyase activity; GO:00168…	PF00330.20:Aconitase family (aconitate hydratase)	--	--	--
TraesCS7A02G178500	TRUE	FALSE	FALSE	FALSE	10.56	11.07	7.24	9.62333	1.3	2.03	0.19	1.17333	21.5	9.28	14.77	15.1833	0.15	24.14	5.07	9.78667	7A	132619034	132620005	+	TraesCS7A02G178500	--	K00020 3-hydroxyisobutyrate dehydrogenase [EC:1.1.1.31] | (GenBank) 6-phosphogluconate dehydrogenase-like protein (A)	ko00280: Valine, leucine and isoleucine degradation; ko01100: Metabolic pathways	protein EXORDIUM-like [Aegilops tauschii subsp. tauschii]	PHI1_TOBAC RecName: Full=Protein PHOSPHATE-INDUCED 1 {ECO:0000303|PubMed:10189698}; Flags: Precursor;	A0A3B6RFN0_WHEAT SubName: Full=Uncharacterized protein {ECO:0000313|EnsemblPlants:TraesCS7A02G178500.1.cds1};	At4g08950	GO:0048046,apoplast; GO:0005615,extracellular space; GO:0005575,cellular_component; GO:0005576,extracellular region; GO:0110165,cellular anatomical entity	PF04674.12:Phosphate-induced protein 1 conserved region	--	--	--
TraesCS6D02G358700	TRUE	TRUE	FALSE	FALSE	7.33	7.33	8.53	7.73	0.98	1.91	1.45	1.44667	3.54	22.27	7.24	11.0167	2.09	1.82	1.48	1.79667	6D	451554298	451559468	-	TraesCS6D02G358700	--	K00020 3-hydroxyisobutyrate dehydrogenase [EC:1.1.1.31] | (RefSeq) probable 3-hydroxyisobutyrate dehydrogenase-like 2, mitochondrial (A)	ko00280: Valine, leucine and isoleucine degradation; ko01100: Metabolic pathways	GATA transcription factor 11-like [Aegilops tauschii subsp. tauschii]	GATA8_ARATH RecName: Full=GATA transcription factor 8;	A0A3B6QNK3_WHEAT RecName: Full=GATA-type domain-containing protein {ECO:0000259|PROSITE:PS50114};	At3g54810	GO:0005634,nucleus; GO:0003700,DNA-binding transcription factor activity; GO:0000976,transcription regulatory region sequence-specific DNA binding; GO:0008270,zinc ion binding; GO:0030154,cell differentiation; GO:0007623,circadian rhythm; GO:0045893,positive regulation of transcription, DNA-templated; GO:0009845,seed germination; GO:0003674,molecular_function; GO:0140110,transcription regulator a…	PF00320.27:GATA zinc finger	C2C2-GATA	TF	C2C2->C2C2-GATA
TraesCS6D02G296400	TRUE	TRUE	TRUE	FALSE	60.06	42.05	39.75	47.2867	1.22	2.28	3	2.16667	31.33	12.82	24.48	22.8767	2.87	2.16	0.88	1.97	6D	407579513	407580749	+	TraesCS6D02G296400	--	K00020 3-hydroxyisobutyrate dehydrogenase [EC:1.1.1.31] | (GenBank) 6-phosphogluconate dehydrogenase-like protein (A)	ko00280: Valine, leucine and isoleucine degradation; ko01100: Metabolic pathways	protein EXORDIUM-like [Aegilops tauschii subsp. tauschii]	PHI1_TOBAC RecName: Full=Protein PHOSPHATE-INDUCED 1 {ECO:0000303|PubMed:10189698}; Flags: Precursor;	A0A453PMG3_AEGTS SubName: Full=Uncharacterized protein {ECO:0000313|EnsemblPlants:AET6Gv20783300.1};	At4g08950	GO:0048046,apoplast; GO:0005615,extracellular space; GO:0005575,cellular_component; GO:0005576,extracellular region; GO:0110165,cellular anatomical entity	PF04674.12:Phosphate-induced protein 1 conserved region	--	--	--
TraesCS6D02G296300	TRUE	TRUE	TRUE	FALSE	19.53	9.47	6.98	11.9933	0	0.18	0	0.06	5.16	9.43	5.92	6.83667	0.34	0	0.03	0.123333	6D	407527245	407528192	+	TraesCS6D02G296300	--	K00020 3-hydroxyisobutyrate dehydrogenase [EC:1.1.1.31] | (GenBank) 6-phosphogluconate dehydrogenase-like protein (A)	ko00280: Valine, leucine and isoleucine degradation; ko01100: Metabolic pathways	protein EXORDIUM-like [Aegilops tauschii subsp. tauschii]	PHI1_TOBAC RecName: Full=Protein PHOSPHATE-INDUCED 1 {ECO:0000303|PubMed:10189698}; Flags: Precursor;	A0A3B6QLG9_WHEAT SubName: Full=Uncharacterized protein {ECO:0000313|EnsemblPlants:TraesCS6D02G296300.1.cds1};	At4g08950	GO:0048046,apoplast; GO:0005615,extracellular space; GO:0005575,cellular_component; GO:0005576,extracellular region; GO:0110165,cellular anatomical entity	PF04674.12:Phosphate-induced protein 1 conserved region	--	--	--
TraesCS6D02G296200	TRUE	TRUE	FALSE	FALSE	41.13	27.59	19.49	29.4033	0.54	1.16	0.11	0.603333	17.8	64.65	47.87	43.44	1.43	2.55	2.3	2.09333	6D	407522648	407524013	+	TraesCS6D02G296200	--	K00020 3-hydroxyisobutyrate dehydrogenase [EC:1.1.1.31] | (GenBank) 6-phosphogluconate dehydrogenase-like protein (A)	ko00280: Valine, leucine and isoleucine degradation; ko01100: Metabolic pathways	protein EXORDIUM-like [Aegilops tauschii subsp. tauschii]	PHI1_TOBAC RecName: Full=Protein PHOSPHATE-INDUCED 1 {ECO:0000303|PubMed:10189698}; Flags: Precursor;	A0A453PMV4_AEGTS SubName: Full=Uncharacterized protein {ECO:0000313|EnsemblPlants:AET6Gv20783100.1};	At4g08950	GO:0048046,apoplast; GO:0005615,extracellular space; GO:0005575,cellular_component; GO:0005576,extracellular region; GO:0110165,cellular anatomical entity	PF04674.12:Phosphate-induced protein 1 conserved region	--	--	--
TraesCS6D02G296100	TRUE	TRUE	FALSE	FALSE	61.19	46.48	30.19	45.9533	0	0.18	0	0.06	15.41	46.95	44.42	35.5933	0.25	0.34	0	0.196667	6D	407469587	407471128	-	TraesCS6D02G296100	--	K00020 3-hydroxyisobutyrate dehydrogenase [EC:1.1.1.31] | (GenBank) 6-phosphogluconate dehydrogenase-like protein (A)	ko00280: Valine, leucine and isoleucine degradation; ko01100: Metabolic pathways	protein EXORDIUM-like [Aegilops tauschii subsp. tauschii]	PHI1_ORYSJ RecName: Full=Protein PHOSPHATE-INDUCED 1 homolog {ECO:0000303|PubMed:24486766}; Short=OsPHI-1 {ECO:0000303|PubMed:24486766}; Flags: Precursor;	A0A453PML3_AEGTS SubName: Full=Uncharacterized protein {ECO:0000313|EnsemblPlants:AET6Gv20782900.1};	At1g35140	GO:0048046,apoplast; GO:0005615,extracellular space; GO:0005575,cellular_component; GO:0005576,extracellular region; GO:0110165,cellular anatomical entity	PF04674.12:Phosphate-induced protein 1 conserved region	--	--	--
TraesCS6D02G251000	TRUE	FALSE	FALSE	FALSE	12.18	8.62	7.85	9.55	27.27	27.58	21.98	25.61	8.84	14.27	8.81	10.64	20.47	19.38	20.81	20.22	6D	354838892	354842963	-	TraesCS6D02G251000	--	K01438 acetylornithine deacetylase [EC:3.5.1.16] | (RefSeq) acetylornithine deacetylase-like (A)	ko00220: Arginine biosynthesis; ko01100: Metabolic pathways; ko01110: Biosynthesis of secondary metabolites; ko01210: 2-Oxocarboxylic acid metabolism; ko01230: Biosynthesis of amino acids	acetylornithine deacetylase [Aegilops tauschii subsp. tauschii]	ARGE_ARATH RecName: Full=Acetylornithine deacetylase; EC=3.5.1.16; AltName: Full=N-acetylornithinase; Short=AO; Short=Acetylornithinase; Short=NAO;	A0A453PAU5_AEGTS RecName: Full=M20_dimer domain-containing protein {ECO:0000259|Pfam:PF07687};	At4g17830	GO:0008777,acetylornithine deacetylase activity; GO:0046872,metal ion binding; GO:0006526,arginine biosynthetic process; GO:0003674,molecular_function; GO:0003824,catalytic activity; GO:0016787,hydrolase activity; GO:0016810,hydrolase activity, acting on carbon-nitrogen (but not peptide) bonds; GO:0016811,hydrolase activity, acting on carbon-nitrogen (but not peptide) bonds, in linear amides; GO:…	PF01546.28:Peptidase family M20/M25/M40	--	--	--
TraesCS6D02G230100	TRUE	FALSE	FALSE	FALSE	11.6	11.75	16.1	13.15	5.65	9.54	5.27	6.82	5.57	10.38	9.61	8.52	5.5	9.1	11.91	8.83667	6D	322585393	322588053	-	TraesCS6D02G230100	S-adenosylmethionine synthase [Source:UniProtKB/TrEMBL%3BAcc:A0A1D6B308]	K00789 S-adenosylmethionine synthetase [EC:2.5.1.6] | (RefSeq) S-adenosylmethionine synthase 3 (A)	ko00270: Cysteine and methionine metabolism; ko00999: Biosynthesis of various plant secondary metabolites; ko01100: Metabolic pathways; ko01110: Biosynthesis of secondary metabolites; ko01230: Biosynthesis of amino acids; ko01240: Biosynthesis of cofactors	S-adenosylmethionine synthase 3 [Aegilops tauschii subsp. tauschii]	METK3_HORVU RecName: Full=S-adenosylmethionine synthase 3; Short=AdoMet synthase 3; EC=2.5.1.6 {ECO:0000250|UniProtKB:Q96551}; AltName: Full=Methionine adenosyltransferase 3; Short=MAT 3;	A0A453P8D4_AEGTS RecName: Full=S-adenosylmethionine synthase {ECO:0000256|RuleBase:RU000541}; EC=2.5.1.6 {ECO:0000256|RuleBase:RU000541};	At4g01850	GO:0005737,cytoplasm; GO:0005524,ATP binding; GO:0046872,metal ion binding; GO:0004478,methionine adenosyltransferase activity; GO:0006730,one-carbon metabolic process; GO:0006556,S-adenosylmethionine biosynthetic process; GO:0000166,nucleotide binding; GO:0003674,molecular_function; GO:0005488,binding; GO:0017076,purine nucleotide binding; GO:0030554,adenyl nucleotide binding; GO:0032553,ribonuc…	PF02773.16:S-adenosylmethionine synthetase, C-terminal domain	--	--	--
TraesCS6D02G230000	TRUE	FALSE	FALSE	FALSE	4.35	5.1	6.39	5.28	1.7	1.91	2	1.87	3.31	4.87	4.32	4.16667	0.99	1.66	3.12	1.92333	6D	322570579	322573202	-	TraesCS6D02G230000	S-adenosylmethionine synthase [Source:UniProtKB/TrEMBL%3BAcc:A0A341XE58]	K00789 S-adenosylmethionine synthetase [EC:2.5.1.6] | (RefSeq) S-adenosylmethionine synthase 2 (A)	ko00270: Cysteine and methionine metabolism; ko00999: Biosynthesis of various plant secondary metabolites; ko01100: Metabolic pathways; ko01110: Biosynthesis of secondary metabolites; ko01230: Biosynthesis of amino acids; ko01240: Biosynthesis of cofactors	S-adenosylmethionine synthase 2 [Aegilops tauschii subsp. tauschii]	METK2_HORVU RecName: Full=S-adenosylmethionine synthase 2; Short=AdoMet synthase 2; EC=2.5.1.6 {ECO:0000250|UniProtKB:Q96551}; AltName: Full=Methionine adenosyltransferase 2; Short=MAT 2;	A0A453P8D4_AEGTS RecName: Full=S-adenosylmethionine synthase {ECO:0000256|RuleBase:RU000541}; EC=2.5.1.6 {ECO:0000256|RuleBase:RU000541};	At3g17390	GO:0005737,cytoplasm; GO:0005524,ATP binding; GO:0046872,metal ion binding; GO:0004478,methionine adenosyltransferase activity; GO:0006730,one-carbon metabolic process; GO:0006556,S-adenosylmethionine biosynthetic process; GO:0000166,nucleotide binding; GO:0003674,molecular_function; GO:0005488,binding; GO:0017076,purine nucleotide binding; GO:0030554,adenyl nucleotide binding; GO:0032553,ribonuc…	PF02773.16:S-adenosylmethionine synthetase, C-terminal domain	--	--	--
TraesCS6D02G196300	TRUE	TRUE	FALSE	FALSE	32.68	30.86	33.45	32.33	13.72	20.03	11.55	15.1	27.39	53.76	35.87	39.0067	6.71	6.73	27.47	13.6367	6D	272639825	272642873	+	TraesCS6D02G196300	Glyceraldehyde-3-phosphate dehydrogenase [Source:UniProtKB/TrEMBL%3BAcc:W5GYX5]	K00134 glyceraldehyde 3-phosphate dehydrogenase (phosphorylating) [EC:1.2.1.12] | (RefSeq) glyceraldehyde-3-phosphate dehydrogenase 2, cytosolic (A)	ko00010: Glycolysis / Gluconeogenesis; ko00710: Carbon fixation in photosynthetic organisms; ko01100: Metabolic pathways; ko01110: Biosynthesis of secondary metabolites; ko01200: Carbon metabolism; ko01230: Biosynthesis of amino acids	glyceraldehyde-3-phosphate dehydrogenase 2, cytosolic [Aegilops tauschii subsp. tauschii]	G3PC2_ORYSJ RecName: Full=Glyceraldehyde-3-phosphate dehydrogenase 2, cytosolic; EC=1.2.1.12;	A0A446WDC7_TRITD RecName: Full=Glyceraldehyde-3-phosphate dehydrogenase {ECO:0000256|RuleBase:RU361160}; EC=1.2.1.- {ECO:0000256|RuleBase:RU361160};	At3g04120	GO:0005829,cytosol; GO:0004365,glyceraldehyde-3-phosphate dehydrogenase (NAD+) (phosphorylating) activity; GO:0051287,NAD binding; GO:0050661,NADP binding; GO:0006006,glucose metabolic process; GO:0006096,glycolytic process; GO:0003674,molecular_function; GO:0003824,catalytic activity; GO:0016491,oxidoreductase activity; GO:0016620,oxidoreductase activity, acting on the aldehyde or oxo group of d…	PF02800.20:Glyceraldehyde 3-phosphate dehydrogenase, C-terminal domain	--	--	--
TraesCS6D02G136700	TRUE	FALSE	FALSE	FALSE	1.58	1.22	1.73	1.51	0.09	0.12	0.17	0.126667	1.2	0.53	0.59	0.773333	0.31	0.08	0.58	0.323333	6D	105536581	105539029	+	TraesCS6D02G136700	Chorismate mutase [Source:UniProtKB/TrEMBL%3BAcc:W5H508]	K01850 chorismate mutase [EC:5.4.99.5] | (RefSeq) chorismate mutase 2 (A)	ko00400: Phenylalanine, tyrosine and tryptophan biosynthesis; ko01100: Metabolic pathways; ko01110: Biosynthesis of secondary metabolites; ko01230: Biosynthesis of amino acids	chorismate mutase 2 [Aegilops tauschii subsp. tauschii]	CM2_MAIZE RecName: Full=Chorismate mutase 2, cytosolic {ECO:0000305}; Short=ZmCM2 {ECO:0000303|PubMed:21976020}; EC=5.4.99.5 {ECO:0000255|PROSITE-ProRule:PRU00516, ECO:0000269|PubMed:21976020};	A0A453NHN0_AEGTS RecName: Full=Chorismate mutase {ECO:0000256|ARBA:ARBA00012404}; EC=5.4.99.5 {ECO:0000256|ARBA:ARBA00012404};	At5g10870	GO:0005737,cytoplasm; GO:0005829,cytosol; GO:0004106,chorismate mutase activity; GO:0042803,protein homodimerization activity; GO:0009073,aromatic amino acid family biosynthetic process; GO:0008652,cellular amino acid biosynthetic process; GO:0046417,chorismate metabolic process; GO:0003674,molecular_function; GO:0003824,catalytic activity; GO:0016853,isomerase activity; GO:0016866,intramolecular…	--	--	--	--
TraesCS6D02G074300	TRUE	FALSE	FALSE	FALSE	23.89	17.75	19.43	20.3567	55.78	63.58	49.9	56.42	28.46	41.57	29.27	33.1	48.09	54.48	51.93	51.5	6D	37920912	37926334	+	TraesCS6D02G074300	--	K01703 3-isopropylmalate/(R)-2-methylmalate dehydratase large subunit [EC:4.2.1.33 4.2.1.35] | (RefSeq) 3-isopropylmalate dehydratase large subunit, chloroplastic (A)	ko00290: Valine, leucine and isoleucine biosynthesis; ko00660: C5-Branched dibasic acid metabolism; ko00966: Glucosinolate biosynthesis; ko01100: Metabolic pathways; ko01110: Biosynthesis of secondary metabolites; ko01210: 2-Oxocarboxylic acid metabolism; ko01230: Biosynthesis of amino acids	3-isopropylmalate dehydratase large subunit, chloroplastic [Aegilops tauschii subsp. tauschii]	LEUC_ARATH RecName: Full=3-isopropylmalate dehydratase large subunit, chloroplastic {ECO:0000305}; EC=4.2.1.33 {ECO:0000269|PubMed:19597944}; AltName: Full=2-(omega-methylthio)alkylmalate dehydratase large subunit {ECO:0000305}; EC=4.2.1.170 {ECO:0000269|PubMed:19597944}; AltName: Full=AtLEUC {ECO:0000303|PubMed:20663849}; AltName: Full=Isopropylmalate isomerase large subunit 1 {ECO:0000303|PubMe…	A0A453N3L1_AEGTS RecName: Full=3-isopropylmalate dehydratase {ECO:0000256|ARBA:ARBA00011998}; EC=4.2.1.33 {ECO:0000256|ARBA:ARBA00011998};	At4g13430	GO:0009507,chloroplast; GO:0009570,chloroplast stroma; GO:0009536,plastid; GO:0003861,3-isopropylmalate dehydratase activity; GO:0051539,4 iron, 4 sulfur cluster binding; GO:0050486,intramolecular transferase activity, transferring hydroxy groups; GO:0046872,metal ion binding; GO:0009082,branched-chain amino acid biosynthetic process; GO:0019761,glucosinolate biosynthetic process; GO:0009098,leuc…	PF00330.20:Aconitase family (aconitate hydratase)	--	--	--
TraesCS6D02G065600	TRUE	FALSE	FALSE	FALSE	0.89	0.98	0.75	0.873333	0.2	0.12	0.35	0.223333	0.59	0.09	0.32	0.333333	0	0.03	0	0.01	6D	32058028	32073111	-	TraesCS6D02G065600	--	K01915 glutamine synthetase [EC:6.3.1.2] | (RefSeq) type-1 glutamine synthetase 1-like (A)	ko00220: Arginine biosynthesis; ko00250: Alanine, aspartate and glutamate metabolism; ko00630: Glyoxylate and dicarboxylate metabolism; ko00910: Nitrogen metabolism; ko01100: Metabolic pathways; ko01230: Biosynthesis of amino acids	protein fluG-like isoform X2 [Aegilops tauschii subsp. tauschii]	--	A0A3B6QA47_WHEAT RecName: Full=Gln-synt_C domain-containing protein {ECO:0000259|SMART:SM01230};	At3g53180	GO:0004356,glutamate-ammonia ligase activity; GO:0016787,hydrolase activity; GO:0006542,glutamine biosynthetic process; GO:0003674,molecular_function; GO:0003824,catalytic activity; GO:0016211,ammonia ligase activity; GO:0016874,ligase activity; GO:0016879,ligase activity, forming carbon-nitrogen bonds; GO:0016880,acid-ammonia (or amide) ligase activity; GO:0006082,organic acid metabolic process;…	PF00120.24:Glutamine synthetase, catalytic domain	--	--	--
TraesCS6D02G063500	TRUE	FALSE	FALSE	FALSE	2.79	2.99	3.66	3.14667	5.41	5.89	12.84	8.04667	3.47	2.73	3.81	3.33667	5.73	3.97	4.85	4.85	6D	29875101	29879488	+	TraesCS6D02G063500	--	K01681 aconitate hydratase [EC:4.2.1.3] | (RefSeq) putative aconitate hydratase, cytoplasmic (A)	ko00020: Citrate cycle (TCA cycle); ko00630: Glyoxylate and dicarboxylate metabolism; ko01100: Metabolic pathways; ko01110: Biosynthesis of secondary metabolites; ko01200: Carbon metabolism; ko01210: 2-Oxocarboxylic acid metabolism; ko01230: Biosynthesis of amino acids	uncharacterized protein LOC109737531 isoform X2 [Aegilops tauschii subsp. tauschii]	--	A0A453MZ51_AEGTS SubName: Full=Uncharacterized protein {ECO:0000313|EnsemblPlants:AET6Gv20156800.7};	--	--	--	--	--	--
TraesCS6D02G041600	TRUE	TRUE	FALSE	FALSE	7.47	7.53	5.04	6.68	16.2	19.3	15.65	17.05	11.79	10.42	10.14	10.7833	31.77	30.34	14.31	25.4733	6D	17053828	17058870	-	TraesCS6D02G041600	--	K00167 2-oxoisovalerate dehydrogenase E1 component beta subunit [EC:1.2.4.4] | (RefSeq) 2-oxoisovalerate dehydrogenase subunit beta 1, mitochondrial-like (A)	ko00280: Valine, leucine and isoleucine degradation; ko00640: Propanoate metabolism; ko01100: Metabolic pathways; ko01110: Biosynthesis of secondary metabolites	2-oxoisovalerate dehydrogenase subunit beta 1, mitochondrial-like [Aegilops tauschii subsp. tauschii]	ODBB1_ARATH RecName: Full=2-oxoisovalerate dehydrogenase subunit beta 1, mitochondrial; EC=1.2.4.4; AltName: Full=Branched-chain alpha-keto acid dehydrogenase E1 component beta chain; Short=BCKDE1B; Short=BCKDH E1-beta; Flags: Precursor;	A0A3B6QC73_WHEAT RecName: Full=Transket_pyr domain-containing protein {ECO:0000259|SMART:SM00861};	At1g55510	GO:0005947,mitochondrial alpha-ketoglutarate dehydrogenase complex; GO:0003863,3-methyl-2-oxobutanoate dehydrogenase (2-methylpropanoyl-transferring) activity; GO:0009083,branched-chain amino acid catabolic process; GO:0007584,response to nutrient; GO:0003674,molecular_function; GO:0003824,catalytic activity; GO:0016491,oxidoreductase activity; GO:0016624,oxidoreductase activity, acting on the al…	PF02779.24:Transketolase, pyrimidine binding domain	--	--	--
TraesCS6D02G030800	TRUE	FALSE	FALSE	FALSE	0.04	0.13	0.08	0.0833333	0.25	0.3	0.75	0.433333	0.06	0.35	0.05	0.153333	0.3	0.21	0.26	0.256667	6D	12316102	12325483	+	TraesCS6D02G030800	--	K01681 aconitate hydratase [EC:4.2.1.3] | (RefSeq) putative aconitate hydratase, cytoplasmic (A)	ko00020: Citrate cycle (TCA cycle); ko00630: Glyoxylate and dicarboxylate metabolism; ko01100: Metabolic pathways; ko01110: Biosynthesis of secondary metabolites; ko01200: Carbon metabolism; ko01210: 2-Oxocarboxylic acid metabolism; ko01230: Biosynthesis of amino acids	uncharacterized protein LOC109785042 [Aegilops tauschii subsp. tauschii]	--	A0A3B6QBW1_WHEAT SubName: Full=Uncharacterized protein {ECO:0000313|EnsemblPlants:TraesCS6D02G030800.1};	--	--	--	--	--	--
TraesCS6B02G412300	TRUE	TRUE	FALSE	FALSE	6.03	5.61	7.56	6.4	1.53	2.07	2.12	1.90667	2.71	37.08	9.04	16.2767	2.02	2.55	1.26	1.94333	6B	685964169	685969494	+	TraesCS6B02G412300	--	K00020 3-hydroxyisobutyrate dehydrogenase [EC:1.1.1.31] | (RefSeq) probable 3-hydroxyisobutyrate dehydrogenase-like 2, mitochondrial (A)	ko00280: Valine, leucine and isoleucine degradation; ko01100: Metabolic pathways	GATA transcription factor 11-like [Aegilops tauschii subsp. tauschii]	GATA8_ARATH RecName: Full=GATA transcription factor 8;	A0A446WR67_TRITD RecName: Full=GATA-type domain-containing protein {ECO:0000259|PROSITE:PS50114};	At3g54810	GO:0005634,nucleus; GO:0003700,DNA-binding transcription factor activity; GO:0000976,transcription regulatory region sequence-specific DNA binding; GO:0008270,zinc ion binding; GO:0030154,cell differentiation; GO:0007623,circadian rhythm; GO:0045893,positive regulation of transcription, DNA-templated; GO:0009845,seed germination; GO:0003674,molecular_function; GO:0140110,transcription regulator a…	PF00320.27:GATA zinc finger	C2C2-GATA	TF	C2C2->C2C2-GATA
TraesCS6B02G347400	TRUE	TRUE	FALSE	FALSE	12.9	12.28	8.63	11.27	0.09	0.11	0.13	0.11	9.95	7.22	9.22	8.79667	0.51	0.48	0.03	0.34	6B	611698227	611699819	+	TraesCS6B02G347400	--	K00020 3-hydroxyisobutyrate dehydrogenase [EC:1.1.1.31] | (GenBank) 6-phosphogluconate dehydrogenase-like protein (A)	ko00280: Valine, leucine and isoleucine degradation; ko01100: Metabolic pathways	protein EXORDIUM-like [Aegilops tauschii subsp. tauschii]	PHI1_TOBAC RecName: Full=Protein PHOSPHATE-INDUCED 1 {ECO:0000303|PubMed:10189698}; Flags: Precursor;	A0A3B6PQ63_WHEAT SubName: Full=Uncharacterized protein {ECO:0000313|EnsemblPlants:TraesCS6B02G347400.1.cds1};	At4g08950	GO:0048046,apoplast; GO:0005615,extracellular space; GO:0005575,cellular_component; GO:0005576,extracellular region; GO:0110165,cellular anatomical entity	PF04674.12:Phosphate-induced protein 1 conserved region	--	--	--
TraesCS6B02G347300	TRUE	TRUE	TRUE	FALSE	25.27	15.59	11.2	17.3533	0	0.12	0	0.04	6.83	11.53	5.6	7.98667	0	0	0	0	6B	611504331	611505278	+	TraesCS6B02G347300	--	K00020 3-hydroxyisobutyrate dehydrogenase [EC:1.1.1.31] | (GenBank) 6-phosphogluconate dehydrogenase-like protein (A)	ko00280: Valine, leucine and isoleucine degradation; ko01100: Metabolic pathways	protein EXORDIUM-like [Aegilops tauschii subsp. tauschii]	PHI1_TOBAC RecName: Full=Protein PHOSPHATE-INDUCED 1 {ECO:0000303|PubMed:10189698}; Flags: Precursor;	A0A446WLY4_TRITD SubName: Full=Uncharacterized protein {ECO:0000313|EMBL:VAI61114.1};	At4g08950	GO:0048046,apoplast; GO:0005615,extracellular space; GO:0005575,cellular_component; GO:0005576,extracellular region; GO:0110165,cellular anatomical entity	PF04674.12:Phosphate-induced protein 1 conserved region	--	--	--
TraesCS6B02G347200	TRUE	TRUE	FALSE	TRUE	82.39	55.79	40.13	59.4367	0.46	0.66	0	0.373333	34.2	145.62	93.44	91.0867	2.41	3.42	4.62	3.48333	6B	611499966	611501337	+	TraesCS6B02G347200	--	K00020 3-hydroxyisobutyrate dehydrogenase [EC:1.1.1.31] | (GenBank) 6-phosphogluconate dehydrogenase-like protein (A)	ko00280: Valine, leucine and isoleucine degradation; ko01100: Metabolic pathways	protein EXORDIUM-like [Aegilops tauschii subsp. tauschii]	PHI1_TOBAC RecName: Full=Protein PHOSPHATE-INDUCED 1 {ECO:0000303|PubMed:10189698}; Flags: Precursor;	A0A3B6PSB0_WHEAT SubName: Full=Uncharacterized protein {ECO:0000313|EnsemblPlants:TraesCS6B02G347200.1.cds1};	At4g08950	GO:0048046,apoplast; GO:0005615,extracellular space; GO:0005575,cellular_component; GO:0005576,extracellular region; GO:0110165,cellular anatomical entity	PF04674.12:Phosphate-induced protein 1 conserved region	--	--	--
TraesCS6B02G347100	TRUE	TRUE	TRUE	FALSE	64.42	46.76	39.01	50.0633	0.08	0.08	0	0.0533333	7.29	41.36	24.83	24.4933	0	0.18	0	0.06	6B	611460347	611461691	-	TraesCS6B02G347100	--	K00020 3-hydroxyisobutyrate dehydrogenase [EC:1.1.1.31] | (GenBank) 6-phosphogluconate dehydrogenase-like protein (A)	ko00280: Valine, leucine and isoleucine degradation; ko01100: Metabolic pathways	protein EXORDIUM-like [Aegilops tauschii subsp. tauschii]	PHI1_ORYSJ RecName: Full=Protein PHOSPHATE-INDUCED 1 homolog {ECO:0000303|PubMed:24486766}; Short=OsPHI-1 {ECO:0000303|PubMed:24486766}; Flags: Precursor;	A0A3B6PSE9_WHEAT SubName: Full=Uncharacterized protein {ECO:0000313|EnsemblPlants:TraesCS6B02G347100.1.cds1};	At1g35140	GO:0048046,apoplast; GO:0005615,extracellular space; GO:0005575,cellular_component; GO:0005576,extracellular region; GO:0110165,cellular anatomical entity	PF04674.12:Phosphate-induced protein 1 conserved region	--	--	--
TraesCS6B02G327500	TRUE	FALSE	FALSE	TRUE	19.62	18.21	18.95	18.9267	24.86	38.84	55.62	39.7733	11.13	17.35	19.43	15.97	15.84	8.46	19.83	14.71	6B	577183711	577187787	-	TraesCS6B02G327500	Glutamine synthetase [Source:UniProtKB/TrEMBL%3BAcc:Q45NB6]	K01915 glutamine synthetase [EC:6.3.1.2] | (RefSeq) glutamine synthetase (A)	ko00220: Arginine biosynthesis; ko00250: Alanine, aspartate and glutamate metabolism; ko00630: Glyoxylate and dicarboxylate metabolism; ko00910: Nitrogen metabolism; ko01100: Metabolic pathways; ko01230: Biosynthesis of amino acids	glutamine synthetase [Aegilops tauschii subsp. tauschii]	GLNA3_HORVU RecName: Full=Glutamine synthetase; EC=6.3.1.2; AltName: Full=Cytoplasmic GS3; AltName: Full=Glutamate--ammonia ligase;	A0A287UP01_HORVV RecName: Full=Glutamine synthetase {ECO:0000256|ARBA:ARBA00012937, ECO:0000256|RuleBase:RU004356}; EC=6.3.1.2 {ECO:0000256|ARBA:ARBA00012937, ECO:0000256|RuleBase:RU004356};	At5g37600	GO:0005737,cytoplasm; GO:0005524,ATP binding; GO:0004356,glutamate-ammonia ligase activity; GO:0006542,glutamine biosynthetic process; GO:0000166,nucleotide binding; GO:0003674,molecular_function; GO:0005488,binding; GO:0017076,purine nucleotide binding; GO:0030554,adenyl nucleotide binding; GO:0032553,ribonucleotide binding; GO:0032555,purine ribonucleotide binding; GO:0032559,adenyl ribonucleot…	PF00120.24:Glutamine synthetase, catalytic domain	--	--	--
TraesCS6B02G281600	TRUE	TRUE	FALSE	FALSE	3.71	3.46	3.39	3.52	7.04	8.26	8.68	7.99333	3.75	4.56	3.78	4.03	10.24	9.14	6.18	8.52	6B	507669656	507672792	-	TraesCS6B02G281600	--	K05607 methylglutaconyl-CoA hydratase [EC:4.2.1.18] | (RefSeq) probable enoyl-CoA hydratase 2, mitochondrial (A)	ko00280: Valine, leucine and isoleucine degradation; ko01100: Metabolic pathways	probable enoyl-CoA hydratase 2, mitochondrial isoform X3 [Aegilops tauschii subsp. tauschii]	ECH2M_ARATH RecName: Full=Probable enoyl-CoA hydratase 2, mitochondrial {ECO:0000305}; EC=4.2.1.17 {ECO:0000305}; Flags: Precursor;	A0A3B6PMY7_WHEAT SubName: Full=Uncharacterized protein {ECO:0000313|EnsemblPlants:TraesCS6B02G281600.2};	At4g16800	GO:0005829,cytosol; GO:0005739,mitochondrion; GO:0004300,enoyl-CoA hydratase activity; GO:0004490,methylglutaconyl-CoA hydratase activity; GO:0008233,peptidase activity; GO:0009083,branched-chain amino acid catabolic process; GO:0006635,fatty acid beta-oxidation; GO:0003674,molecular_function; GO:0003824,catalytic activity; GO:0016829,lyase activity; GO:0016835,carbon-oxygen lyase activity; GO:00…	PF00378.20:Enoyl-CoA hydratase/isomerase	--	--	--
TraesCS6B02G276800	TRUE	TRUE	FALSE	FALSE	4.89	5.11	7.1	5.7	1.73	2.04	1.94	1.90333	3.29	4.92	4.21	4.14	0.82	1.04	2.3	1.38667	6B	501061764	501064441	+	TraesCS6B02G276800	S-adenosylmethionine synthase [Source:UniProtKB/TrEMBL%3BAcc:A0A1D6ALD0]	K00789 S-adenosylmethionine synthetase [EC:2.5.1.6] | (RefSeq) S-adenosylmethionine synthase 2-like (A)	ko00270: Cysteine and methionine metabolism; ko00999: Biosynthesis of various plant secondary metabolites; ko01100: Metabolic pathways; ko01110: Biosynthesis of secondary metabolites; ko01230: Biosynthesis of amino acids; ko01240: Biosynthesis of cofactors	putative AdoMet synthase 1 [Hordeum vulgare subsp. vulgare]	METK2_HORVU RecName: Full=S-adenosylmethionine synthase 2; Short=AdoMet synthase 2; EC=2.5.1.6 {ECO:0000250|UniProtKB:Q96551}; AltName: Full=Methionine adenosyltransferase 2; Short=MAT 2;	A0A446WGG2_TRITD RecName: Full=S-adenosylmethionine synthase {ECO:0000256|RuleBase:RU000541}; EC=2.5.1.6 {ECO:0000256|RuleBase:RU000541};	At3g17390	GO:0005737,cytoplasm; GO:0005524,ATP binding; GO:0046872,metal ion binding; GO:0004478,methionine adenosyltransferase activity; GO:0006730,one-carbon metabolic process; GO:0006556,S-adenosylmethionine biosynthetic process; GO:0000166,nucleotide binding; GO:0003674,molecular_function; GO:0005488,binding; GO:0017076,purine nucleotide binding; GO:0030554,adenyl nucleotide binding; GO:0032553,ribonuc…	PF02773.16:S-adenosylmethionine synthetase, C-terminal domain	--	--	--
TraesCS6B02G276700	TRUE	TRUE	FALSE	FALSE	12.07	15.01	20.41	15.83	5.09	5.83	4.88	5.26667	8.94	19.78	13.22	13.98	2.54	4.39	6.73	4.55333	6B	500893097	500895845	+	TraesCS6B02G276700	S-adenosylmethionine synthase [Source:UniProtKB/TrEMBL%3BAcc:A0A1D6B308]	K00789 S-adenosylmethionine synthetase [EC:2.5.1.6] | (RefSeq) S-adenosylmethionine synthase 3 (A)	ko00270: Cysteine and methionine metabolism; ko00999: Biosynthesis of various plant secondary metabolites; ko01100: Metabolic pathways; ko01110: Biosynthesis of secondary metabolites; ko01230: Biosynthesis of amino acids; ko01240: Biosynthesis of cofactors	S-adenosylmethionine synthase 3 [Aegilops tauschii subsp. tauschii]	METK3_HORVU RecName: Full=S-adenosylmethionine synthase 3; Short=AdoMet synthase 3; EC=2.5.1.6 {ECO:0000250|UniProtKB:Q96551}; AltName: Full=Methionine adenosyltransferase 3; Short=MAT 3;	M0XNT1_HORVV RecName: Full=S-adenosylmethionine synthase {ECO:0000256|RuleBase:RU000541}; EC=2.5.1.6 {ECO:0000256|RuleBase:RU000541};	At4g01850	GO:0005737,cytoplasm; GO:0005524,ATP binding; GO:0046872,metal ion binding; GO:0004478,methionine adenosyltransferase activity; GO:0006730,one-carbon metabolic process; GO:0006556,S-adenosylmethionine biosynthetic process; GO:0000166,nucleotide binding; GO:0003674,molecular_function; GO:0005488,binding; GO:0017076,purine nucleotide binding; GO:0030554,adenyl nucleotide binding; GO:0032553,ribonuc…	PF02773.16:S-adenosylmethionine synthetase, C-terminal domain	--	--	--
TraesCS6B02G185400	TRUE	FALSE	FALSE	FALSE	3.63	2.65	2.64	2.97333	5.81	6.73	9	7.18	1.92	6.46	3.16	3.84667	6.47	6.75	6.24	6.48667	6B	210780489	210786373	-	TraesCS6B02G185400	Glyceraldehyde-3-phosphate dehydrogenase [Source:UniProtKB/TrEMBL%3BAcc:A0A1D6B1T9]	K00134 glyceraldehyde 3-phosphate dehydrogenase (phosphorylating) [EC:1.2.1.12] | (RefSeq) glyceraldehyde-3-phosphate dehydrogenase GAPCP1, chloroplastic-like (A)	ko00010: Glycolysis / Gluconeogenesis; ko00710: Carbon fixation in photosynthetic organisms; ko01100: Metabolic pathways; ko01110: Biosynthesis of secondary metabolites; ko01200: Carbon metabolism; ko01230: Biosynthesis of amino acids	glyceraldehyde-3-phosphate dehydrogenase GAPCP1, chloroplastic-like [Aegilops tauschii subsp. tauschii]	G3PP1_ARATH RecName: Full=Glyceraldehyde-3-phosphate dehydrogenase GAPCP1, chloroplastic; EC=1.2.1.12; AltName: Full=Glyceraldehyde-3-phosphate dehydrogenase of plastid 1; AltName: Full=NAD-dependent glyceraldehydephosphate dehydrogenase chloroplastic 1; Flags: Precursor;	A0A3B6PJM1_WHEAT RecName: Full=Glyceraldehyde-3-phosphate dehydrogenase {ECO:0000256|RuleBase:RU361160}; EC=1.2.1.- {ECO:0000256|RuleBase:RU361160};	At1g79530	GO:0009570,chloroplast stroma; GO:0005829,cytosol; GO:0009536,plastid; GO:0005507,copper ion binding; GO:0004365,glyceraldehyde-3-phosphate dehydrogenase (NAD+) (phosphorylating) activity; GO:0051287,NAD binding; GO:0050661,NADP binding; GO:0008270,zinc ion binding; GO:0080144,amino acid homeostasis; GO:0048658,anther wall tapetum development; GO:0005975,carbohydrate metabolic process; GO:0006006…	PF02800.20:Glyceraldehyde 3-phosphate dehydrogenase, C-terminal domain	--	--	--
TraesCS6B02G108100	TRUE	FALSE	FALSE	FALSE	23.28	18.45	17.25	19.66	67.73	84.12	47.66	66.5033	31.19	44.54	31.32	35.6833	54.93	67.96	58.91	60.6	6B	88711376	88716647	+	TraesCS6B02G108100	--	K01703 3-isopropylmalate/(R)-2-methylmalate dehydratase large subunit [EC:4.2.1.33 4.2.1.35] | (RefSeq) 3-isopropylmalate dehydratase large subunit, chloroplastic-like (A)	ko00290: Valine, leucine and isoleucine biosynthesis; ko00660: C5-Branched dibasic acid metabolism; ko00966: Glucosinolate biosynthesis; ko01100: Metabolic pathways; ko01110: Biosynthesis of secondary metabolites; ko01210: 2-Oxocarboxylic acid metabolism; ko01230: Biosynthesis of amino acids	3-isopropylmalate dehydratase large subunit, chloroplastic [Aegilops tauschii subsp. tauschii]	LEUC_ARATH RecName: Full=3-isopropylmalate dehydratase large subunit, chloroplastic {ECO:0000305}; EC=4.2.1.33 {ECO:0000269|PubMed:19597944}; AltName: Full=2-(omega-methylthio)alkylmalate dehydratase large subunit {ECO:0000305}; EC=4.2.1.170 {ECO:0000269|PubMed:19597944}; AltName: Full=AtLEUC {ECO:0000303|PubMed:20663849}; AltName: Full=Isopropylmalate isomerase large subunit 1 {ECO:0000303|PubMe…	A0A446W2T3_TRITD RecName: Full=3-isopropylmalate dehydratase {ECO:0000256|ARBA:ARBA00011998}; EC=4.2.1.33 {ECO:0000256|ARBA:ARBA00011998};	At4g13430	GO:0009507,chloroplast; GO:0009570,chloroplast stroma; GO:0009536,plastid; GO:0003861,3-isopropylmalate dehydratase activity; GO:0051539,4 iron, 4 sulfur cluster binding; GO:0050486,intramolecular transferase activity, transferring hydroxy groups; GO:0046872,metal ion binding; GO:0009082,branched-chain amino acid biosynthetic process; GO:0019761,glucosinolate biosynthetic process; GO:0009098,leuc…	PF00330.20:Aconitase family (aconitate hydratase)	--	--	--
TraesCS6B02G103100	TRUE	FALSE	FALSE	FALSE	1.6	1.05	1	1.21667	4.14	4.78	4.96	4.62667	1.15	1.68	1.92	1.58333	3.52	2.44	3.67	3.21	6B	81007993	81010994	+	TraesCS6B02G103100	--	K01681 aconitate hydratase [EC:4.2.1.3] | (RefSeq) putative aconitate hydratase, cytoplasmic (A)	ko00020: Citrate cycle (TCA cycle); ko00630: Glyoxylate and dicarboxylate metabolism; ko01100: Metabolic pathways; ko01110: Biosynthesis of secondary metabolites; ko01200: Carbon metabolism; ko01210: 2-Oxocarboxylic acid metabolism; ko01230: Biosynthesis of amino acids	uncharacterized protein LOC109781559 [Aegilops tauschii subsp. tauschii]	--	A0A446W2B0_TRITD RecName: Full=F-box domain-containing protein {ECO:0000259|SMART:SM00256};	--	--	PF12937.7:F-box-like	--	--	--
TraesCS6B02G084400	TRUE	TRUE	FALSE	FALSE	9.42	4.33	5.82	6.52333	3.13	2.43	1.69	2.41667	6.32	4.32	5.76	5.46667	1.02	2.15	1.8	1.65667	6B	61492624	61493859	+	TraesCS6B02G084400	EMB3119 [Source:Projected from Arabidopsis thaliana (AT3G04790) UniProtKB/TrEMBL%3BAcc:A0A178V804]	K01807 ribose 5-phosphate isomerase A [EC:5.3.1.6] | (RefSeq) probable ribose-5-phosphate isomerase 3, chloroplastic (A)	ko00030: Pentose phosphate pathway; ko00710: Carbon fixation in photosynthetic organisms; ko01100: Metabolic pathways; ko01110: Biosynthesis of secondary metabolites; ko01200: Carbon metabolism; ko01230: Biosynthesis of amino acids	probable ribose-5-phosphate isomerase 3, chloroplastic [Aegilops tauschii subsp. tauschii]	RPI3_ARATH RecName: Full=Probable ribose-5-phosphate isomerase 3, chloroplastic; EC=5.3.1.6; AltName: Full=Phosphoriboisomerase 3; AltName: Full=Protein EMBRYO DEFECTIVE 3119; Flags: Precursor;	A0A3B6PGE1_WHEAT RecName: Full=Ribose-5-phosphate isomerase {ECO:0000256|ARBA:ARBA00011959}; EC=5.3.1.6 {ECO:0000256|ARBA:ARBA00011959};	At3g04790	GO:0009507,chloroplast; GO:0009941,chloroplast envelope; GO:0009570,chloroplast stroma; GO:0009535,chloroplast thylakoid membrane; GO:0005829,cytosol; GO:0009579,thylakoid; GO:0004751,ribose-5-phosphate isomerase activity; GO:0042742,defense response to bacterium; GO:0009052,pentose-phosphate shunt, non-oxidative branch; GO:0019253,reductive pentose-phosphate cycle; GO:0003674,molecular_function;…	PF06026.14:Ribose 5-phosphate isomerase A (phosphoriboisomerase A)	--	--	--
TraesCS6B02G074900	TRUE	FALSE	FALSE	FALSE	0.65	0.59	0.6	0.613333	1.51	0.99	5.36	2.62	0.61	0.18	0.82	0.536667	0.73	0.24	1.36	0.776667	6B	51431857	51435804	-	TraesCS6B02G074900	--	K01681 aconitate hydratase [EC:4.2.1.3] | (RefSeq) putative aconitate hydratase, cytoplasmic (A)	ko00020: Citrate cycle (TCA cycle); ko00630: Glyoxylate and dicarboxylate metabolism; ko01100: Metabolic pathways; ko01110: Biosynthesis of secondary metabolites; ko01200: Carbon metabolism; ko01210: 2-Oxocarboxylic acid metabolism; ko01230: Biosynthesis of amino acids	F-box protein At5g03970-like [Aegilops tauschii subsp. tauschii]	--	A0A446W0X1_TRITD RecName: Full=F-box domain-containing protein {ECO:0000259|Pfam:PF00646};	--	--	PF12937.7:F-box-like	--	--	--
TraesCS6A02G374600	TRUE	TRUE	FALSE	FALSE	9.39	11.33	12.83	11.1833	1.18	2.02	1.44	1.54667	6.03	39.45	12.06	19.18	2.79	2.85	2.61	2.75	6A	597339914	597343314	+	TraesCS6A02G374600	--	K00020 3-hydroxyisobutyrate dehydrogenase [EC:1.1.1.31] | (RefSeq) probable 3-hydroxyisobutyrate dehydrogenase-like 2, mitochondrial (A)	ko00280: Valine, leucine and isoleucine degradation; ko01100: Metabolic pathways	predicted protein [Hordeum vulgare subsp. vulgare]	GATA8_ARATH RecName: Full=GATA transcription factor 8;	A0A446VT87_TRITD RecName: Full=GATA-type domain-containing protein {ECO:0000259|PROSITE:PS50114};	At3g54810	GO:0005634,nucleus; GO:0003700,DNA-binding transcription factor activity; GO:0000976,transcription regulatory region sequence-specific DNA binding; GO:0008270,zinc ion binding; GO:0030154,cell differentiation; GO:0007623,circadian rhythm; GO:0045893,positive regulation of transcription, DNA-templated; GO:0009845,seed germination; GO:0003674,molecular_function; GO:0140110,transcription regulator a…	PF00320.27:GATA zinc finger	C2C2-GATA	TF	C2C2->C2C2-GATA
TraesCS6A02G316900	TRUE	TRUE	FALSE	FALSE	27.96	21.31	20.5	23.2567	0.09	0.1	0	0.0633333	27.75	9.22	19.55	18.84	0.75	0.02	0.2	0.323333	6A	553100181	553101363	+	TraesCS6A02G316900	--	K00020 3-hydroxyisobutyrate dehydrogenase [EC:1.1.1.31] | (GenBank) 6-phosphogluconate dehydrogenase-like protein (A)	ko00280: Valine, leucine and isoleucine degradation; ko01100: Metabolic pathways	protein EXORDIUM-like [Aegilops tauschii subsp. tauschii]	PHI1_TOBAC RecName: Full=Protein PHOSPHATE-INDUCED 1 {ECO:0000303|PubMed:10189698}; Flags: Precursor;	A0A3B6NV87_WHEAT SubName: Full=Uncharacterized protein {ECO:0000313|EnsemblPlants:TraesCS6A02G316900.1.cds1};	At4g08950	GO:0048046,apoplast; GO:0005615,extracellular space; GO:0005575,cellular_component; GO:0005576,extracellular region; GO:0110165,cellular anatomical entity	PF04674.12:Phosphate-induced protein 1 conserved region	--	--	--
TraesCS6A02G316800	TRUE	TRUE	FALSE	FALSE	16.85	10.07	6.89	11.27	0	0.14	0	0.0466667	4.94	10.48	7.1	7.50667	0.13	0.16	0.18	0.156667	6A	553058769	553060365	+	TraesCS6A02G316800	--	K00020 3-hydroxyisobutyrate dehydrogenase [EC:1.1.1.31] | (GenBank) 6-phosphogluconate dehydrogenase-like protein (A)	ko00280: Valine, leucine and isoleucine degradation; ko01100: Metabolic pathways	protein EXORDIUM-like [Aegilops tauschii subsp. tauschii]	PHI1_TOBAC RecName: Full=Protein PHOSPHATE-INDUCED 1 {ECO:0000303|PubMed:10189698}; Flags: Precursor;	A0A3B6NU59_WHEAT SubName: Full=Uncharacterized protein {ECO:0000313|EnsemblPlants:TraesCS6A02G316800.1.cds1};	At4g08950	GO:0048046,apoplast; GO:0005615,extracellular space; GO:0005575,cellular_component; GO:0005576,extracellular region; GO:0110165,cellular anatomical entity	PF04674.12:Phosphate-induced protein 1 conserved region	--	--	--
TraesCS6A02G316700	TRUE	TRUE	FALSE	FALSE	77.02	59.11	41.82	59.3167	0.2	0.57	0.06	0.276667	41.67	97.71	74.94	71.44	0.41	0.77	0.18	0.453333	6A	553054686	553056164	+	TraesCS6A02G316700	--	K00020 3-hydroxyisobutyrate dehydrogenase [EC:1.1.1.31] | (GenBank) 6-phosphogluconate dehydrogenase-like protein (A)	ko00280: Valine, leucine and isoleucine degradation; ko01100: Metabolic pathways	protein EXORDIUM-like [Aegilops tauschii subsp. tauschii]	PHI1_TOBAC RecName: Full=Protein PHOSPHATE-INDUCED 1 {ECO:0000303|PubMed:10189698}; Flags: Precursor;	A0A3B6NSK6_WHEAT SubName: Full=Uncharacterized protein {ECO:0000313|EnsemblPlants:TraesCS6A02G316700.1.cds1};	At4g08950	GO:0048046,apoplast; GO:0005615,extracellular space; GO:0005575,cellular_component; GO:0005576,extracellular region; GO:0110165,cellular anatomical entity	PF04674.12:Phosphate-induced protein 1 conserved region	--	--	--
TraesCS6A02G316600	TRUE	TRUE	FALSE	FALSE	51.53	41.72	32.52	41.9233	0	0.09	0.06	0.05	16.35	46.76	40.16	34.4233	0.12	0.29	0.17	0.193333	6A	553003172	553004778	-	TraesCS6A02G316600	--	K00020 3-hydroxyisobutyrate dehydrogenase [EC:1.1.1.31] | (GenBank) 6-phosphogluconate dehydrogenase-like protein (A)	ko00280: Valine, leucine and isoleucine degradation; ko01100: Metabolic pathways	protein EXORDIUM-like [Aegilops tauschii subsp. tauschii]	PHI1_ORYSJ RecName: Full=Protein PHOSPHATE-INDUCED 1 homolog {ECO:0000303|PubMed:24486766}; Short=OsPHI-1 {ECO:0000303|PubMed:24486766}; Flags: Precursor;	A0A3B6NUV1_WHEAT SubName: Full=Uncharacterized protein {ECO:0000313|EnsemblPlants:TraesCS6A02G316600.1.cds1};	At1g35140	GO:0048046,apoplast; GO:0005615,extracellular space; GO:0005575,cellular_component; GO:0005576,extracellular region; GO:0110165,cellular anatomical entity	PF04674.12:Phosphate-induced protein 1 conserved region	--	--	--
TraesCS6A02G305400	TRUE	TRUE	TRUE	FALSE	28.29	22.68	18.84	23.27	60.1	57.28	64.71	60.6967	52.42	57.47	58.08	55.99	131.95	132.89	115.6	126.813	6A	538056534	538059287	-	TraesCS6A02G305400	--	K00891 shikimate kinase [EC:2.7.1.71] | (RefSeq) shikimate kinase 1, chloroplastic-like (A)	ko00400: Phenylalanine, tyrosine and tryptophan biosynthesis; ko01100: Metabolic pathways; ko01110: Biosynthesis of secondary metabolites; ko01230: Biosynthesis of amino acids	shikimate kinase 1, chloroplastic-like [Aegilops tauschii subsp. tauschii]	SK1_ORYSJ RecName: Full=Shikimate kinase 1, chloroplastic; Short=OsSK1; EC=2.7.1.71; Flags: Precursor;	A0A3B6NTR3_WHEAT RecName: Full=Shikimate kinase {ECO:0000256|ARBA:ARBA00012154}; EC=2.7.1.71 {ECO:0000256|ARBA:ARBA00012154};	At2g21940	GO:0009507,chloroplast; GO:0009536,plastid; GO:0005524,ATP binding; GO:0046872,metal ion binding; GO:0004765,shikimate kinase activity; GO:0009073,aromatic amino acid family biosynthetic process; GO:0008652,cellular amino acid biosynthetic process; GO:0009423,chorismate biosynthetic process; GO:0019632,shikimate metabolic process; GO:0000166,nucleotide binding; GO:0003674,molecular_function; GO:0…	PF01202.22:Shikimate kinase	--	--	--
TraesCS6A02G248000	TRUE	FALSE	FALSE	FALSE	7.71	7.63	9.8	8.38	2.88	4.35	2.96	3.39667	6.1	10	7.89	7.99667	2.86	5.38	6.57	4.93667	6A	460004738	460007096	-	TraesCS6A02G248000	S-adenosylmethionine synthase [Source:UniProtKB/TrEMBL%3BAcc:A0A1D6B308]	K00789 S-adenosylmethionine synthetase [EC:2.5.1.6] | (RefSeq) S-adenosylmethionine synthase 3 (A)	ko00270: Cysteine and methionine metabolism; ko00999: Biosynthesis of various plant secondary metabolites; ko01100: Metabolic pathways; ko01110: Biosynthesis of secondary metabolites; ko01230: Biosynthesis of amino acids; ko01240: Biosynthesis of cofactors	S-adenosylmethionine synthase 3 [Aegilops tauschii subsp. tauschii]	METK3_HORVU RecName: Full=S-adenosylmethionine synthase 3; Short=AdoMet synthase 3; EC=2.5.1.6 {ECO:0000250|UniProtKB:Q96551}; AltName: Full=Methionine adenosyltransferase 3; Short=MAT 3;	M0XNT1_HORVV RecName: Full=S-adenosylmethionine synthase {ECO:0000256|RuleBase:RU000541}; EC=2.5.1.6 {ECO:0000256|RuleBase:RU000541};	At4g01850	GO:0005737,cytoplasm; GO:0005524,ATP binding; GO:0046872,metal ion binding; GO:0004478,methionine adenosyltransferase activity; GO:0006730,one-carbon metabolic process; GO:0006556,S-adenosylmethionine biosynthetic process; GO:0000166,nucleotide binding; GO:0003674,molecular_function; GO:0005488,binding; GO:0017076,purine nucleotide binding; GO:0030554,adenyl nucleotide binding; GO:0032553,ribonuc…	PF02773.16:S-adenosylmethionine synthetase, C-terminal domain	--	--	--
TraesCS6A02G247900	TRUE	FALSE	FALSE	FALSE	3.3	3.12	4.28	3.56667	1.16	1.61	1.55	1.44	2.66	3.2	2.61	2.82333	1.27	0.68	2.13	1.36	6A	459876636	459879504	-	TraesCS6A02G247900	S-adenosylmethionine synthase [Source:UniProtKB/TrEMBL%3BAcc:A0A341WK11]	K00789 S-adenosylmethionine synthetase [EC:2.5.1.6] | (RefSeq) S-adenosylmethionine synthase 2 (A)	ko00270: Cysteine and methionine metabolism; ko00999: Biosynthesis of various plant secondary metabolites; ko01100: Metabolic pathways; ko01110: Biosynthesis of secondary metabolites; ko01230: Biosynthesis of amino acids; ko01240: Biosynthesis of cofactors	S-adenosylmethionine synthase 1 [Triticum urartu]	METK2_HORVU RecName: Full=S-adenosylmethionine synthase 2; Short=AdoMet synthase 2; EC=2.5.1.6 {ECO:0000250|UniProtKB:Q96551}; AltName: Full=Methionine adenosyltransferase 2; Short=MAT 2;	A0A446VIX8_TRITD RecName: Full=S-adenosylmethionine synthase {ECO:0000256|RuleBase:RU000541}; EC=2.5.1.6 {ECO:0000256|RuleBase:RU000541};	At3g17390	GO:0005737,cytoplasm; GO:0005524,ATP binding; GO:0046872,metal ion binding; GO:0004478,methionine adenosyltransferase activity; GO:0006730,one-carbon metabolic process; GO:0006556,S-adenosylmethionine biosynthetic process; GO:0000166,nucleotide binding; GO:0003674,molecular_function; GO:0005488,binding; GO:0017076,purine nucleotide binding; GO:0030554,adenyl nucleotide binding; GO:0032553,ribonuc…	PF02773.16:S-adenosylmethionine synthetase, C-terminal domain	--	--	--
TraesCS6A02G239600	TRUE	FALSE	FALSE	FALSE	1.36	0.64	0.86	0.953333	0.21	0.45	0.07	0.243333	0.69	0.4	0.46	0.516667	0.24	0.96	0.34	0.513333	6A	449692238	449698877	-	TraesCS6A02G239600	Aldehyde dehydrogenase [Source:UniProtKB/TrEMBL%3BAcc:A0A1D6A896]	K00128 aldehyde dehydrogenase (NAD+) [EC:1.2.1.3] | (RefSeq) aldehyde dehydrogenase family 3 member F1-like (A)	ko00010: Glycolysis / Gluconeogenesis; ko00053: Ascorbate and aldarate metabolism; ko00071: Fatty acid degradation; ko00280: Valine, leucine and isoleucine degradation; ko00310: Lysine degradation; ko00330: Arginine and proline metabolism; ko00340: Histidine metabolism; ko00380: Tryptophan metabolism; ko00410: beta-Alanine metabolism; ko00561: Glycerolipid metabolism; ko00620: Pyruvate metabolism…	aldehyde dehydrogenase family 3 member F1-like [Aegilops tauschii subsp. tauschii]	AL3F1_ARATH RecName: Full=Aldehyde dehydrogenase family 3 member F1; EC=1.2.1.3;	A0A446VI32_TRITD RecName: Full=Aldedh domain-containing protein {ECO:0000259|Pfam:PF00171};	At1g44170	GO:0005783,endoplasmic reticulum; GO:0005886,plasma membrane; GO:0004028,3-chloroallyl aldehyde dehydrogenase activity; GO:0004029,aldehyde dehydrogenase (NAD+) activity; GO:0043878,glyceraldehyde-3-phosphate dehydrogenase (NAD+) (non-phosphorylating) activity; GO:0006081,cellular aldehyde metabolic process; GO:0003674,molecular_function; GO:0003824,catalytic activity; GO:0016491,oxidoreductase a…	PF00171.22:Aldehyde dehydrogenase family	--	--	--
TraesCS6A02G218300	TRUE	FALSE	FALSE	FALSE	1.82	1.49	1.58	1.63	0.18	0.82	0.31	0.436667	1.73	1.96	1.13	1.60667	1.16	1.03	0.78	0.99	6A	404349072	404355526	+	TraesCS6A02G218300	--	K01653 acetolactate synthase I/III small subunit [EC:2.2.1.6] | (RefSeq) acetolactate synthase small subunit 2, chloroplastic-like isoform X1 (A)	ko00290: Valine, leucine and isoleucine biosynthesis; ko00650: Butanoate metabolism; ko00660: C5-Branched dibasic acid metabolism; ko00770: Pantothenate and CoA biosynthesis; ko01100: Metabolic pathways; ko01110: Biosynthesis of secondary metabolites; ko01210: 2-Oxocarboxylic acid metabolism; ko01230: Biosynthesis of amino acids	acetolactate synthase small subunit 2, chloroplastic-like isoform X2 [Aegilops tauschii subsp. tauschii]	ILVH2_ARATH RecName: Full=Acetolactate synthase small subunit 2, chloroplastic; AltName: Full=Acetohydroxy-acid synthase small subunit; Short=AHAS; Short=ALS; Flags: Precursor;	A0A3B6NQP7_WHEAT RecName: Full=Acetohydroxy-acid synthase small subunit {ECO:0000256|ARBA:ARBA00019804};	At5g16290	GO:0009507,chloroplast; GO:0005829,cytosol; GO:0005777,peroxisome; GO:0003984,acetolactate synthase activity; GO:1990610,acetolactate synthase regulator activity; GO:0043621,protein self-association; GO:0009097,isoleucine biosynthetic process; GO:0050790,regulation of catalytic activity; GO:0009099,valine biosynthetic process; GO:0003674,molecular_function; GO:0003824,catalytic activity; GO:00167…	PF10369.9:Small subunit of acetolactate synthase	--	--	--
TraesCS6A02G080600	TRUE	FALSE	FALSE	FALSE	9	8.83	9.11	8.98	29.54	34.72	23.29	29.1833	13.31	24.12	19.46	18.9633	35.08	39.3	37.03	37.1367	6A	49189676	49195607	+	TraesCS6A02G080600	--	K01703 3-isopropylmalate/(R)-2-methylmalate dehydratase large subunit [EC:4.2.1.33 4.2.1.35] | (RefSeq) 3-isopropylmalate dehydratase large subunit, chloroplastic-like (A)	ko00290: Valine, leucine and isoleucine biosynthesis; ko00660: C5-Branched dibasic acid metabolism; ko00966: Glucosinolate biosynthesis; ko01100: Metabolic pathways; ko01110: Biosynthesis of secondary metabolites; ko01210: 2-Oxocarboxylic acid metabolism; ko01230: Biosynthesis of amino acids	3-isopropylmalate dehydratase large subunit, chloroplastic [Aegilops tauschii subsp. tauschii]	LEUC_ARATH RecName: Full=3-isopropylmalate dehydratase large subunit, chloroplastic {ECO:0000305}; EC=4.2.1.33 {ECO:0000269|PubMed:19597944}; AltName: Full=2-(omega-methylthio)alkylmalate dehydratase large subunit {ECO:0000305}; EC=4.2.1.170 {ECO:0000269|PubMed:19597944}; AltName: Full=AtLEUC {ECO:0000303|PubMed:20663849}; AltName: Full=Isopropylmalate isomerase large subunit 1 {ECO:0000303|PubMe…	A0A446V4N5_TRITD RecName: Full=3-isopropylmalate dehydratase {ECO:0000256|ARBA:ARBA00011998}; EC=4.2.1.33 {ECO:0000256|ARBA:ARBA00011998};	At4g13430	GO:0009507,chloroplast; GO:0009570,chloroplast stroma; GO:0009536,plastid; GO:0003861,3-isopropylmalate dehydratase activity; GO:0051539,4 iron, 4 sulfur cluster binding; GO:0050486,intramolecular transferase activity, transferring hydroxy groups; GO:0046872,metal ion binding; GO:0009082,branched-chain amino acid biosynthetic process; GO:0019761,glucosinolate biosynthetic process; GO:0009098,leuc…	PF00330.20:Aconitase family (aconitate hydratase)	--	--	--
TraesCS6A02G077100	TRUE	FALSE	FALSE	FALSE	1.27	1	1.31	1.19333	2.87	2.25	3.59	2.90333	1.08	1.07	1.18	1.11	1.94	1.35	1.31	1.53333	6A	47139763	47144037	+	TraesCS6A02G077100	--	K01681 aconitate hydratase [EC:4.2.1.3] | (RefSeq) putative aconitate hydratase, cytoplasmic (A)	ko00020: Citrate cycle (TCA cycle); ko00630: Glyoxylate and dicarboxylate metabolism; ko01100: Metabolic pathways; ko01110: Biosynthesis of secondary metabolites; ko01200: Carbon metabolism; ko01210: 2-Oxocarboxylic acid metabolism; ko01230: Biosynthesis of amino acids	uncharacterized protein LOC109781559 [Aegilops tauschii subsp. tauschii]	--	A0A3B6NLP1_WHEAT RecName: Full=F-box domain-containing protein {ECO:0000259|SMART:SM00256};	--	--	PF12937.7:F-box-like	--	--	--
TraesCS6A02G073700	TRUE	FALSE	FALSE	FALSE	0.54	0.42	0.79	0.583333	0.82	1.56	2.73	1.70333	0.1	0.19	0.39	0.226667	0.69	0.03	0.45	0.39	6A	41497163	41500657	-	TraesCS6A02G073700	--	K01681 aconitate hydratase [EC:4.2.1.3] | (RefSeq) putative aconitate hydratase, cytoplasmic (A)	ko00020: Citrate cycle (TCA cycle); ko00630: Glyoxylate and dicarboxylate metabolism; ko01100: Metabolic pathways; ko01110: Biosynthesis of secondary metabolites; ko01200: Carbon metabolism; ko01210: 2-Oxocarboxylic acid metabolism; ko01230: Biosynthesis of amino acids	PREDICTED: putative F-box protein At3g16210 [Brachypodium distachyon]	--	A0A3B6NKI7_WHEAT RecName: Full=F-box domain-containing protein {ECO:0000259|Pfam:PF00646};	--	--	PF00646.33:F-box domain	--	--	--
TraesCS6A02G061000	TRUE	FALSE	FALSE	FALSE	1.02	1.1	1.65	1.25667	2.53	3.09	8.38	4.66667	1.42	1.55	2.36	1.77667	3.84	2.63	2.2	2.89	6A	32795043	32796994	-	TraesCS6A02G061000	--	K01681 aconitate hydratase [EC:4.2.1.3] | (RefSeq) putative aconitate hydratase, cytoplasmic (A)	ko00020: Citrate cycle (TCA cycle); ko00630: Glyoxylate and dicarboxylate metabolism; ko01100: Metabolic pathways; ko01110: Biosynthesis of secondary metabolites; ko01200: Carbon metabolism; ko01210: 2-Oxocarboxylic acid metabolism; ko01230: Biosynthesis of amino acids	uncharacterized protein LOC109737533, partial [Aegilops tauschii subsp. tauschii]	--	A0A3B6NL59_WHEAT SubName: Full=Uncharacterized protein {ECO:0000313|EnsemblPlants:TraesCS6A02G061000.1};	--	--	--	--	--	--
TraesCS6A02G006600	TRUE	FALSE	FALSE	FALSE	0.28	0.17	0.51	0.32	1.08	0.72	3.88	1.89333	0.61	0.22	0.38	0.403333	1.45	0.25	0.92	0.873333	6A	2716291	2719670	-	TraesCS6A02G006600	--	K01681 aconitate hydratase [EC:4.2.1.3] | (RefSeq) putative aconitate hydratase, cytoplasmic (A)	ko00020: Citrate cycle (TCA cycle); ko00630: Glyoxylate and dicarboxylate metabolism; ko01100: Metabolic pathways; ko01110: Biosynthesis of secondary metabolites; ko01200: Carbon metabolism; ko01210: 2-Oxocarboxylic acid metabolism; ko01230: Biosynthesis of amino acids	putative F-box/kelch-repeat protein At3g17540 [Aegilops tauschii subsp. tauschii]	FBK60_ARATH RecName: Full=Putative F-box/kelch-repeat protein At3g17540;	A0A3B6NIQ6_WHEAT RecName: Full=F-box domain-containing protein {ECO:0000259|Pfam:PF00646};	At3g17540	--	PF12937.7:F-box-like	--	--	--
TraesCS5D02G487000	TRUE	FALSE	FALSE	FALSE	1.23	1.08	1.48	1.26333	2.89	3.1	2.88	2.95667	1.88	1.8	2.23	1.97	3.01	3.88	2.44	3.11	5D	522032244	522037541	+	TraesCS5D02G487000	--	K00928 aspartate kinase [EC:2.7.2.4] | (RefSeq) aspartokinase 1, chloroplastic-like isoform X1 (A)	ko00260: Glycine, serine and threonine metabolism; ko00261: Monobactam biosynthesis; ko00270: Cysteine and methionine metabolism; ko00300: Lysine biosynthesis; ko01100: Metabolic pathways; ko01110: Biosynthesis of secondary metabolites; ko01210: 2-Oxocarboxylic acid metabolism; ko01230: Biosynthesis of amino acids	aspartokinase 1, chloroplastic-like isoform X1 [Aegilops tauschii subsp. tauschii]	AK1_ARATH RecName: Full=Aspartokinase 1, chloroplastic; EC=2.7.2.4; AltName: Full=Aspartate kinase 1; Flags: Precursor;	A0A453M901_AEGTS RecName: Full=Aspartate kinase {ECO:0000256|ARBA:ARBA00013059}; EC=2.7.2.4 {ECO:0000256|ARBA:ARBA00013059};	At5g13280	GO:0009570,chloroplast stroma; GO:0004072,aspartate kinase activity; GO:0005524,ATP binding; GO:0008652,cellular amino acid biosynthetic process; GO:0009090,homoserine biosynthetic process; GO:0009089,lysine biosynthetic process via diaminopimelate; GO:0009088,threonine biosynthetic process; GO:0003674,molecular_function; GO:0003824,catalytic activity; GO:0016301,kinase activity; GO:0016740,trans…	PF00696.28:Amino acid kinase family	--	--	--
TraesCS5D02G437200	TRUE	FALSE	FALSE	FALSE	14.73	14.73	19.32	16.26	26.16	29.38	74.62	43.3867	13.32	14.13	13.32	13.59	26.1	9.14	38.16	24.4667	5D	491108506	491110200	+	TraesCS5D02G437200	--	K00850 6-phosphofructokinase 1 [EC:2.7.1.11] | (RefSeq) ATP-dependent 6-phosphofructokinase 6-like (A)	ko00010: Glycolysis / Gluconeogenesis; ko00030: Pentose phosphate pathway; ko00051: Fructose and mannose metabolism; ko00052: Galactose metabolism; ko01100: Metabolic pathways; ko01110: Biosynthesis of secondary metabolites; ko01200: Carbon metabolism; ko01230: Biosynthesis of amino acids; ko03018: RNA degradation	purine permease 3-like [Aegilops tauschii subsp. tauschii]	PUP3_ARATH RecName: Full=Purine permease 3; Short=AtPUP3;	A0A3B6MYW0_WHEAT RecName: Full=Probable purine permease {ECO:0000256|RuleBase:RU368015};	At1g28220	GO:0016021,integral component of membrane; GO:0016020,membrane; GO:0005345,purine nucleobase transmembrane transporter activity; GO:0015211,purine nucleoside transmembrane transporter activity; GO:0006863,purine nucleobase transport; GO:0003674,molecular_function; GO:0005215,transporter activity; GO:0008509,anion transmembrane transporter activity; GO:0015075,ion transmembrane transporter activit…	PF16913.5:Purine nucleobase transmembrane transport	--	--	--
TraesCS5D02G425700	TRUE	FALSE	FALSE	FALSE	0.38	0.35	0.29	0.34	0.79	0.85	1.22	0.953333	0.12	0.16	0.25	0.176667	0.62	0.28	0.69	0.53	5D	484415744	484418248	+	TraesCS5D02G425700	--	K01681 aconitate hydratase [EC:4.2.1.3] | (RefSeq) putative aconitate hydratase, cytoplasmic (A)	ko00020: Citrate cycle (TCA cycle); ko00630: Glyoxylate and dicarboxylate metabolism; ko01100: Metabolic pathways; ko01110: Biosynthesis of secondary metabolites; ko01200: Carbon metabolism; ko01210: 2-Oxocarboxylic acid metabolism; ko01230: Biosynthesis of amino acids	uncharacterized protein LOC109763801 [Aegilops tauschii subsp. tauschii]	--	A0A3B6N076_WHEAT RecName: Full=F-box domain-containing protein {ECO:0000259|Pfam:PF00646};	--	--	PF12937.7:F-box-like	--	--	--
TraesCS5D02G407800	TRUE	TRUE	FALSE	FALSE	15.06	12.62	9.95	12.5433	38.64	39.94	29.3	35.96	17.09	32.61	16.42	22.04	49.13	44.05	35.78	42.9867	5D	472734451	472737590	+	TraesCS5D02G407800	--	K00133 aspartate-semialdehyde dehydrogenase [EC:1.2.1.11] | (RefSeq) uncharacterized protein LOC109743487 (A)	ko00260: Glycine, serine and threonine metabolism; ko00261: Monobactam biosynthesis; ko00270: Cysteine and methionine metabolism; ko00300: Lysine biosynthesis; ko01100: Metabolic pathways; ko01110: Biosynthesis of secondary metabolites; ko01210: 2-Oxocarboxylic acid metabolism; ko01230: Biosynthesis of amino acids	uncharacterized protein LOC109743487 [Aegilops tauschii subsp. tauschii]	--	A0A3B6MWX3_WHEAT RecName: Full=Aspartate-semialdehyde dehydrogenase {ECO:0000256|ARBA:ARBA00013120}; EC=1.2.1.11 {ECO:0000256|ARBA:ARBA00013120};	At1g14810	GO:0004073,aspartate-semialdehyde dehydrogenase activity; GO:0051287,NAD binding; GO:0050661,NADP binding; GO:0046983,protein dimerization activity; GO:0009097,isoleucine biosynthetic process; GO:0009089,lysine biosynthetic process via diaminopimelate; GO:0009086,methionine biosynthetic process; GO:0009088,threonine biosynthetic process; GO:0003674,molecular_function; GO:0003824,catalytic activit…	PF02774.18:Semialdehyde dehydrogenase, dimerisation domain	--	--	--
TraesCS5D02G386800	TRUE	TRUE	FALSE	FALSE	8.67	7.5	9.87	8.68	14.46	15.37	27.95	19.26	5.96	9.26	7.31	7.51	18.43	19.08	18.66	18.7233	5D	456607644	456612314	-	TraesCS5D02G386800	--	K01968 3-methylcrotonyl-CoA carboxylase alpha subunit [EC:6.4.1.4] | (RefSeq) methylcrotonoyl-CoA carboxylase subunit alpha, mitochondrial (A)	ko00280: Valine, leucine and isoleucine degradation; ko01100: Metabolic pathways	serine/threonine-protein kinase HT1-like [Aegilops tauschii subsp. tauschii]	STY13_ARATH RecName: Full=Serine/threonine-protein kinase STY13 {ECO:0000305}; EC=2.7.11.1 {ECO:0000269|PubMed:16429265}; AltName: Full=AtSTYPK {ECO:0000303|PubMed:17291444}; AltName: Full=Serine/threonine/tyrosine-protein kinase 13 {ECO:0000303|PubMed:16429265};	A0A3B6MXH6_WHEAT RecName: Full=Protein kinase domain-containing protein {ECO:0000259|PROSITE:PS50011};	At3g22750	GO:0005737,cytoplasm; GO:0005886,plasma membrane; GO:0005524,ATP binding; GO:0004672,protein kinase activity; GO:0106310,protein serine kinase activity; GO:0004674,protein serine/threonine kinase activity; GO:0004712,protein serine/threonine/tyrosine kinase activity; GO:0106311,protein threonine kinase activity; GO:0004713,protein tyrosine kinase activity; GO:0006468,protein phosphorylation; GO:0…	PF07714.17:Protein tyrosine kinase	--	--	--
TraesCS5D02G331100	TRUE	TRUE	FALSE	FALSE	8.95	6.97	7.61	7.84333	2.45	3.46	2.09	2.66667	8.21	11.76	5.49	8.48667	2.05	4.25	3.98	3.42667	5D	422017750	422021807	-	TraesCS5D02G331100	TIM [Source:Projected from Arabidopsis thaliana (AT2G21170) UniProtKB/TrEMBL%3BAcc:A0A178VN28]	K01803 triosephosphate isomerase (TIM) [EC:5.3.1.1] | (RefSeq) triosephosphate isomerase, chloroplastic-like (A)	ko00010: Glycolysis / Gluconeogenesis; ko00051: Fructose and mannose metabolism; ko00562: Inositol phosphate metabolism; ko00710: Carbon fixation in photosynthetic organisms; ko01100: Metabolic pathways; ko01110: Biosynthesis of secondary metabolites; ko01200: Carbon metabolism; ko01230: Biosynthesis of amino acids	triosephosphate isomerase, chloroplastic [Aegilops tauschii subsp. tauschii]	TPIC_SECCE RecName: Full=Triosephosphate isomerase, chloroplastic; Short=TIM; Short=Triose-phosphate isomerase; EC=5.3.1.1; Flags: Precursor;	A0A3B6MVX7_WHEAT SubName: Full=Uncharacterized protein {ECO:0000313|EnsemblPlants:TraesCS5D02G331100.1};	At2g21170	GO:0009507,chloroplast; GO:0004807,triose-phosphate isomerase activity; GO:0006096,glycolytic process; GO:0019253,reductive pentose-phosphate cycle; GO:0003674,molecular_function; GO:0003824,catalytic activity; GO:0016853,isomerase activity; GO:0016860,intramolecular oxidoreductase activity; GO:0016861,intramolecular oxidoreductase activity, interconverting aldoses and ketoses; GO:0005975,carbohy…	PF00121.18:Triosephosphate isomerase	--	--	--
TraesCS5D02G181600	TRUE	TRUE	FALSE	FALSE	4.74	3.72	3.73	4.06333	1.81	1.76	2.62	2.06333	4.95	7.23	4.33	5.50333	1.15	2.82	1.74	1.90333	5D	282352740	282365630	-	TraesCS5D02G181600	--	K12524 bifunctional aspartokinase / homoserine dehydrogenase 1 [EC:2.7.2.4 1.1.1.3] | (RefSeq) bifunctional aspartokinase/homoserine dehydrogenase 2, chloroplastic isoform X1 (A)	ko00260: Glycine, serine and threonine metabolism; ko00261: Monobactam biosynthesis; ko00270: Cysteine and methionine metabolism; ko00300: Lysine biosynthesis; ko01100: Metabolic pathways; ko01110: Biosynthesis of secondary metabolites; ko01230: Biosynthesis of amino acids	bifunctional aspartokinase/homoserine dehydrogenase 2, chloroplastic isoform X1 [Aegilops tauschii subsp. tauschii]	AKH2_MAIZE RecName: Full=Bifunctional aspartokinase/homoserine dehydrogenase 2, chloroplastic; Short=AK-HD 2; Short=AK-HSDH 2; Includes: RecName: Full=Aspartokinase; EC=2.7.2.4; Includes: RecName: Full=Homoserine dehydrogenase; EC=1.1.1.3; Flags: Precursor;	A0A3B6MQV6_WHEAT RecName: Full=Aspartokinase {ECO:0000256|ARBA:ARBA00016273}; EC=1.1.1.3 {ECO:0000256|ARBA:ARBA00013213}; EC=2.7.2.4 {ECO:0000256|ARBA:ARBA00013059}; AltName: Full=Homoserine dehydrogenase {ECO:0000256|ARBA:ARBA00013376};	At1g31230	GO:0009507,chloroplast; GO:0004072,aspartate kinase activity; GO:0005524,ATP binding; GO:0004412,homoserine dehydrogenase activity; GO:0050661,NADP binding; GO:0009067,aspartate family amino acid biosynthetic process; GO:0009090,homoserine biosynthetic process; GO:0009089,lysine biosynthetic process via diaminopimelate; GO:0009086,methionine biosynthetic process; GO:0009088,threonine biosynthetic…	PF00742.19:Homoserine dehydrogenase	--	--	--
TraesCS5D02G159100	TRUE	FALSE	FALSE	TRUE	36.04	42.11	48.43	42.1933	12.15	18.41	4.01	11.5233	30.46	23.61	20.6	24.89	59.95	46.88	16.47	41.1	5D	247610358	247613753	+	TraesCS5D02G159100	--	K01953 asparagine synthase (glutamine-hydrolysing) [EC:6.3.5.4] | (RefSeq) asparagine synthetase [glutamine-hydrolyzing] (A)	ko00250: Alanine, aspartate and glutamate metabolism; ko01100: Metabolic pathways; ko01110: Biosynthesis of secondary metabolites; ko01230: Biosynthesis of amino acids	asparagine synthetase [glutamine-hydrolyzing]	ASNS_ASPOF RecName: Full=Asparagine synthetase [glutamine-hydrolyzing]; Short=AS; EC=6.3.5.4;	A0A453KEM6_AEGTS RecName: Full=Asparagine synthase (glutamine-hydrolyzing) {ECO:0000256|ARBA:ARBA00012737}; EC=6.3.5.4 {ECO:0000256|ARBA:ARBA00012737};	At3g47340	GO:0004066,asparagine synthase (glutamine-hydrolyzing) activity; GO:0005524,ATP binding; GO:0006541,glutamine metabolic process; GO:0070981,L-asparagine biosynthetic process; GO:0003674,molecular_function; GO:0003824,catalytic activity; GO:0016874,ligase activity; GO:0016879,ligase activity, forming carbon-nitrogen bonds; GO:0016884,carbon-nitrogen ligase activity, with glutamine as amido-N-donor…	PF00733.21:Asparagine synthase	--	--	--
TraesCS5D02G139300	TRUE	TRUE	FALSE	FALSE	121.56	119.62	119.77	120.317	30.93	30.72	33.52	31.7233	73.21	102.75	118.54	98.1667	22.82	31.83	39.71	31.4533	5D	221879103	221882526	+	TraesCS5D02G139300	Aluminum induced protein with YGL and LRDR motifs [Source:Projected from Arabidopsis thaliana (AT5G19140) UniProtKB/TrEMBL%3BAcc:Q94BR2]	K01953 asparagine synthase (glutamine-hydrolysing) [EC:6.3.5.4] | (RefSeq) asparagine synthetase [glutamine-hydrolyzing] 2-like (A)	ko00250: Alanine, aspartate and glutamate metabolism; ko01100: Metabolic pathways; ko01110: Biosynthesis of secondary metabolites; ko01230: Biosynthesis of amino acids	stem-specific protein TSJT1 [Aegilops tauschii subsp. tauschii]	TSJT1_TOBAC RecName: Full=Stem-specific protein TSJT1;	A0A453KAZ5_AEGTS RecName: Full=DUF3700 domain-containing protein {ECO:0000259|SMART:SM01172};	At5g19140	--	PF12481.8:Aluminium induced protein	--	--	--
TraesCS5D02G127300	TRUE	TRUE	FALSE	FALSE	0.13	0.27	0.32	0.24	0.71	0.98	1.56	1.08333	0.15	0.16	0.72	0.343333	2.33	0.58	1.19	1.36667	5D	197420156	197426979	-	TraesCS5D02G127300	Aldehyde dehydrogenase [Source:UniProtKB/TrEMBL%3BAcc:A0A1D6S537]	K00128 aldehyde dehydrogenase (NAD+) [EC:1.2.1.3] | (RefSeq) aldehyde dehydrogenase family 3 member H1-like (A)	ko00010: Glycolysis / Gluconeogenesis; ko00053: Ascorbate and aldarate metabolism; ko00071: Fatty acid degradation; ko00280: Valine, leucine and isoleucine degradation; ko00310: Lysine degradation; ko00330: Arginine and proline metabolism; ko00340: Histidine metabolism; ko00380: Tryptophan metabolism; ko00410: beta-Alanine metabolism; ko00561: Glycerolipid metabolism; ko00620: Pyruvate metabolism…	aldehyde dehydrogenase family 3 member H1-like [Aegilops tauschii subsp. tauschii]	AL3H1_ARATH RecName: Full=Aldehyde dehydrogenase family 3 member H1; Short=AtALDH4; Short=Ath-ALDH4; EC=1.2.1.3;	A0A3B6MM74_WHEAT RecName: Full=Aldehyde dehydrogenase {ECO:0000256|PIRNR:PIRNR036492};	At1g44170	GO:0005783,endoplasmic reticulum; GO:0005794,Golgi apparatus; GO:0005634,nucleus; GO:0009506,plasmodesma; GO:0009536,plastid; GO:0005773,vacuole; GO:0004028,3-chloroallyl aldehyde dehydrogenase activity; GO:0004029,aldehyde dehydrogenase (NAD+) activity; GO:0043878,glyceraldehyde-3-phosphate dehydrogenase (NAD+) (non-phosphorylating) activity; GO:0006081,cellular aldehyde metabolic process; GO:00…	PF00171.22:Aldehyde dehydrogenase family	--	--	--
TraesCS5D02G057900	TRUE	FALSE	FALSE	FALSE	0.56	0.22	0.15	0.31	0.93	0.73	0.98	0.88	0.36	0.26	0.21	0.276667	0.31	0.89	0.45	0.55	5D	54684719	54689460	-	TraesCS5D02G057900	--	K01681 aconitate hydratase [EC:4.2.1.3] | (RefSeq) putative aconitate hydratase, cytoplasmic (A)	ko00020: Citrate cycle (TCA cycle); ko00630: Glyoxylate and dicarboxylate metabolism; ko01100: Metabolic pathways; ko01110: Biosynthesis of secondary metabolites; ko01200: Carbon metabolism; ko01210: 2-Oxocarboxylic acid metabolism; ko01230: Biosynthesis of amino acids	uncharacterized protein LOC109742397 [Aegilops tauschii subsp. tauschii]	--	A0A3B6ML35_WHEAT RecName: Full=F-box domain-containing protein {ECO:0000259|Pfam:PF12937};	--	--	PF12937.7:F-box-like	--	--	--
TraesCS5B02G505800	TRUE	FALSE	FALSE	FALSE	0.78	0.76	1.23	0.923333	2.2	2.06	1.85	2.03667	0.84	1.37	0.96	1.05667	0.87	1.61	1.16	1.21333	5B	671353307	671357236	-	TraesCS5B02G505800	--	K01681 aconitate hydratase [EC:4.2.1.3] | (RefSeq) putative aconitate hydratase, cytoplasmic (A)	ko00020: Citrate cycle (TCA cycle); ko00630: Glyoxylate and dicarboxylate metabolism; ko01100: Metabolic pathways; ko01110: Biosynthesis of secondary metabolites; ko01200: Carbon metabolism; ko01210: 2-Oxocarboxylic acid metabolism; ko01230: Biosynthesis of amino acids	hypothetical protein TRIUR3_03238 [Triticum urartu]	--	A0A3B6LX07_WHEAT RecName: Full=F-box domain-containing protein {ECO:0000259|Pfam:PF00646};	--	--	PF00646.33:F-box domain	--	--	--
TraesCS5B02G420000	TRUE	FALSE	TRUE	FALSE	0.51	0.57	0.5	0.526667	1.42	1.47	2.08	1.65667	2.31	1.74	1.72	1.92333	2.81	1.86	2.32	2.33	5B	595652652	595656200	+	TraesCS5B02G420000	--	K01681 aconitate hydratase [EC:4.2.1.3] | (RefSeq) putative aconitate hydratase, cytoplasmic (A)	ko00020: Citrate cycle (TCA cycle); ko00630: Glyoxylate and dicarboxylate metabolism; ko01100: Metabolic pathways; ko01110: Biosynthesis of secondary metabolites; ko01200: Carbon metabolism; ko01210: 2-Oxocarboxylic acid metabolism; ko01230: Biosynthesis of amino acids	uncharacterized protein LOC109763798 [Aegilops tauschii subsp. tauschii]	--	A0A446UPC7_TRITD RecName: Full=F-box domain-containing protein {ECO:0000259|Pfam:PF00646};	--	--	PF12937.7:F-box-like	--	--	--
TraesCS5B02G419300	TRUE	FALSE	TRUE	FALSE	4.53	4.97	3.46	4.32	1.75	1.91	0.58	1.41333	3.37	1.51	1.12	2	1.17	1.9	0.94	1.33667	5B	594922735	594925178	-	TraesCS5B02G419300	--	K01807 ribose 5-phosphate isomerase A [EC:5.3.1.6] | (RefSeq) probable ribose-5-phosphate isomerase 4, chloroplastic isoform X1 (A)	ko00030: Pentose phosphate pathway; ko00710: Carbon fixation in photosynthetic organisms; ko01100: Metabolic pathways; ko01110: Biosynthesis of secondary metabolites; ko01200: Carbon metabolism; ko01230: Biosynthesis of amino acids	probable ribose-5-phosphate isomerase 4, chloroplastic [Aegilops tauschii subsp. tauschii]	RPI4_ARATH RecName: Full=Probable ribose-5-phosphate isomerase 4, chloroplastic; EC=5.3.1.6; AltName: Full=Phosphoriboisomerase 4; Flags: Precursor;	A0A3B6LU48_WHEAT RecName: Full=Ribose-5-phosphate isomerase {ECO:0000256|ARBA:ARBA00011959}; EC=5.3.1.6 {ECO:0000256|ARBA:ARBA00011959};	At5g44520	GO:0009507,chloroplast; GO:0004751,ribose-5-phosphate isomerase activity; GO:0009052,pentose-phosphate shunt, non-oxidative branch; GO:0003674,molecular_function; GO:0003824,catalytic activity; GO:0016853,isomerase activity; GO:0016860,intramolecular oxidoreductase activity; GO:0016861,intramolecular oxidoreductase activity, interconverting aldoses and ketoses; GO:0006091,generation of precursor …	PF06026.14:Ribose 5-phosphate isomerase A (phosphoriboisomerase A)	--	--	--
TraesCS5B02G389000	TRUE	FALSE	FALSE	FALSE	10.21	15.14	16.37	13.9067	3.97	5.97	6.23	5.39	11.04	7.63	10.42	9.69667	3.82	8.13	8.18	6.71	5B	568176351	568180373	+	TraesCS5B02G389000	--	K01968 3-methylcrotonyl-CoA carboxylase alpha subunit [EC:6.4.1.4] | (RefSeq) LOW QUALITY PROTEIN: methylcrotonoyl-CoA carboxylase subunit alpha, mitochondrial (A)	ko00280: Valine, leucine and isoleucine degradation; ko01100: Metabolic pathways	serine/threonine-protein kinase HT1-like [Aegilops tauschii subsp. tauschii]	STY13_ARATH RecName: Full=Serine/threonine-protein kinase STY13 {ECO:0000305}; EC=2.7.11.1 {ECO:0000269|PubMed:16429265}; AltName: Full=AtSTYPK {ECO:0000303|PubMed:17291444}; AltName: Full=Serine/threonine/tyrosine-protein kinase 13 {ECO:0000303|PubMed:16429265};	A0A446ULV3_TRITD RecName: Full=Protein kinase domain-containing protein {ECO:0000259|PROSITE:PS50011};	At3g22750	GO:0005737,cytoplasm; GO:0005886,plasma membrane; GO:0005524,ATP binding; GO:0004672,protein kinase activity; GO:0106310,protein serine kinase activity; GO:0004674,protein serine/threonine kinase activity; GO:0004712,protein serine/threonine/tyrosine kinase activity; GO:0106311,protein threonine kinase activity; GO:0004713,protein tyrosine kinase activity; GO:0006468,protein phosphorylation; GO:0…	PF07714.17:Protein tyrosine kinase	--	--	--
TraesCS5B02G380400	TRUE	FALSE	FALSE	FALSE	5.18	3.44	4.84	4.48667	9.13	7.02	19.39	11.8467	4.2	5.95	4.16	4.77	7.75	8.32	8.94	8.33667	5B	558341804	558347101	-	TraesCS5B02G380400	--	K01968 3-methylcrotonyl-CoA carboxylase alpha subunit [EC:6.4.1.4] | (RefSeq) methylcrotonoyl-CoA carboxylase subunit alpha, mitochondrial (A)	ko00280: Valine, leucine and isoleucine degradation; ko01100: Metabolic pathways	serine/threonine-protein kinase HT1-like [Aegilops tauschii subsp. tauschii]	STY13_ARATH RecName: Full=Serine/threonine-protein kinase STY13 {ECO:0000305}; EC=2.7.11.1 {ECO:0000269|PubMed:16429265}; AltName: Full=AtSTYPK {ECO:0000303|PubMed:17291444}; AltName: Full=Serine/threonine/tyrosine-protein kinase 13 {ECO:0000303|PubMed:16429265};	A0A446UL69_TRITD RecName: Full=Protein kinase domain-containing protein {ECO:0000259|PROSITE:PS50011};	At3g22750	GO:0005737,cytoplasm; GO:0005886,plasma membrane; GO:0005524,ATP binding; GO:0004672,protein kinase activity; GO:0106310,protein serine kinase activity; GO:0004674,protein serine/threonine kinase activity; GO:0004712,protein serine/threonine/tyrosine kinase activity; GO:0106311,protein threonine kinase activity; GO:0004713,protein tyrosine kinase activity; GO:0006468,protein phosphorylation; GO:0…	PF07714.17:Protein tyrosine kinase	--	--	--
TraesCS5B02G331100	TRUE	FALSE	FALSE	FALSE	6.36	5.08	4.65	5.36333	12.76	15.08	10.09	12.6433	3.34	4.51	4.33	4.06	7.01	8.22	6.76	7.33	5B	515193372	515198080	-	TraesCS5B02G331100	3-dehydroquinate synthase%2C chloroplastic [Source:Projected from Arabidopsis thaliana (AT5G66120) UniProtKB/Swiss-Prot%3BAcc:Q8VYV7]	K01735 3-dehydroquinate synthase [EC:4.2.3.4] | (RefSeq) 3-dehydroquinate synthase, chloroplastic-like (A)	ko00400: Phenylalanine, tyrosine and tryptophan biosynthesis; ko01100: Metabolic pathways; ko01110: Biosynthesis of secondary metabolites; ko01230: Biosynthesis of amino acids	3-dehydroquinate synthase, chloroplastic [Aegilops tauschii subsp. tauschii]	DHQS_ACTCC RecName: Full=3-dehydroquinate synthase, chloroplastic; EC=4.2.3.4; Flags: Precursor;	A0A3B6LRA1_WHEAT RecName: Full=DHQ_synthase domain-containing protein {ECO:0000259|Pfam:PF01761};	At5g66120	GO:0009507,chloroplast; GO:0003856,3-dehydroquinate synthase activity; GO:0042802,identical protein binding; GO:0046872,metal ion binding; GO:0051287,NAD binding; GO:0009073,aromatic amino acid family biosynthetic process; GO:0008652,cellular amino acid biosynthetic process; GO:0009423,chorismate biosynthetic process; GO:0003674,molecular_function; GO:0003824,catalytic activity; GO:0016829,lyase …	PF01761.20:3-dehydroquinate synthase	--	--	--
TraesCS5B02G245100	TRUE	FALSE	TRUE	TRUE	5.07	8.55	10.36	7.99333	2.55	2.99	4.62	3.38667	2.85	0.64	2.68	2.05667	1.28	0.5	1.32	1.03333	5B	426512013	426520360	-	TraesCS5B02G245100	--	K00850 6-phosphofructokinase 1 [EC:2.7.1.11] | (RefSeq) ATP-dependent 6-phosphofructokinase 6-like (A)	ko00010: Glycolysis / Gluconeogenesis; ko00030: Pentose phosphate pathway; ko00051: Fructose and mannose metabolism; ko00052: Galactose metabolism; ko01100: Metabolic pathways; ko01110: Biosynthesis of secondary metabolites; ko01200: Carbon metabolism; ko01230: Biosynthesis of amino acids; ko03018: RNA degradation	purine permease 3-like [Aegilops tauschii subsp. tauschii]	PUP3_ARATH RecName: Full=Purine permease 3; Short=AtPUP3;	A0A446UCD2_TRITD RecName: Full=Probable purine permease {ECO:0000256|RuleBase:RU368015};	At1g28220	GO:0016021,integral component of membrane; GO:0016020,membrane; GO:0005345,purine nucleobase transmembrane transporter activity; GO:0015211,purine nucleoside transmembrane transporter activity; GO:0006863,purine nucleobase transport; GO:0003674,molecular_function; GO:0005215,transporter activity; GO:0008509,anion transmembrane transporter activity; GO:0015075,ion transmembrane transporter activit…	PF16913.5:Purine nucleobase transmembrane transport	--	--	--
TraesCS5B02G152600	TRUE	FALSE	TRUE	FALSE	20.69	17.24	17.17	18.3667	4.65	4.99	4.57	4.73667	10.63	11.18	9.01	10.2733	8.48	9.83	9.07	9.12667	5B	281836802	281840213	+	TraesCS5B02G152600	--	K01953 asparagine synthase (glutamine-hydrolysing) [EC:6.3.5.4] | (RefSeq) asparagine synthetase [glutamine-hydrolyzing] (A)	ko00250: Alanine, aspartate and glutamate metabolism; ko01100: Metabolic pathways; ko01110: Biosynthesis of secondary metabolites; ko01230: Biosynthesis of amino acids	glutamine-dependent asparagine synthetase [Triticum aestivum]	ASNS_ASPOF RecName: Full=Asparagine synthetase [glutamine-hydrolyzing]; Short=AS; EC=6.3.5.4;	A0A3B6LIG5_WHEAT RecName: Full=Asparagine synthetase [glutamine-hydrolyzing] {ECO:0000256|PIRNR:PIRNR001589}; EC=6.3.5.4 {ECO:0000256|PIRNR:PIRNR001589};	At3g47340	GO:0004066,asparagine synthase (glutamine-hydrolyzing) activity; GO:0005524,ATP binding; GO:0006541,glutamine metabolic process; GO:0070981,L-asparagine biosynthetic process; GO:0003674,molecular_function; GO:0003824,catalytic activity; GO:0016874,ligase activity; GO:0016879,ligase activity, forming carbon-nitrogen bonds; GO:0016884,carbon-nitrogen ligase activity, with glutamine as amido-N-donor…	PF00733.21:Asparagine synthase	--	--	--
TraesCS5B02G131500	TRUE	TRUE	TRUE	FALSE	161.32	167.62	182.83	170.59	36.6	46.55	54.46	45.87	87.19	59.65	107.8	84.88	41.99	32.06	40.42	38.1567	5B	244411412	244414663	+	TraesCS5B02G131500	Aluminum induced protein with YGL and LRDR motifs [Source:Projected from Arabidopsis thaliana (AT5G19140) UniProtKB/TrEMBL%3BAcc:Q94BR2]	K01953 asparagine synthase (glutamine-hydrolysing) [EC:6.3.5.4] | (RefSeq) asparagine synthetase [glutamine-hydrolyzing] 2-like (A)	ko00250: Alanine, aspartate and glutamate metabolism; ko01100: Metabolic pathways; ko01110: Biosynthesis of secondary metabolites; ko01230: Biosynthesis of amino acids	stem-specific protein TSJT1 [Aegilops tauschii subsp. tauschii]	TSJT1_TOBAC RecName: Full=Stem-specific protein TSJT1;	A0A3B6LJD4_WHEAT RecName: Full=DUF3700 domain-containing protein {ECO:0000259|SMART:SM01172};	At5g19140	--	PF12481.8:Aluminium induced protein	--	--	--
TraesCS5B02G121400	TRUE	FALSE	TRUE	FALSE	14.47	14.56	14.67	14.5667	5.52	6.66	9.47	7.21667	10.21	6.58	7.63	8.14	6.99	6.3	4.29	5.86	5B	216649842	216653719	+	TraesCS5B02G121400	--	K00166 2-oxoisovalerate dehydrogenase E1 component alpha subunit [EC:1.2.4.4] | (RefSeq) 2-oxoisovalerate dehydrogenase subunit alpha 2, mitochondrial-like (A)	ko00280: Valine, leucine and isoleucine degradation; ko00640: Propanoate metabolism; ko01100: Metabolic pathways; ko01110: Biosynthesis of secondary metabolites	2-oxoisovalerate dehydrogenase subunit alpha 2, mitochondrial-like [Aegilops tauschii subsp. tauschii]	ODBA2_ARATH RecName: Full=2-oxoisovalerate dehydrogenase subunit alpha 2, mitochondrial; EC=1.2.4.4; AltName: Full=Branched-chain alpha-keto acid dehydrogenase E1 component alpha chain; Short=BCKDE1A; Short=BCKDH E1-alpha; Flags: Precursor;	A0A446U102_TRITD RecName: Full=E1_dh domain-containing protein {ECO:0000259|Pfam:PF00676};	At5g09300	GO:0005947,mitochondrial alpha-ketoglutarate dehydrogenase complex; GO:0005739,mitochondrion; GO:0003863,3-methyl-2-oxobutanoate dehydrogenase (2-methylpropanoyl-transferring) activity; GO:0003826,alpha-ketoacid dehydrogenase activity; GO:0046872,metal ion binding; GO:0009083,branched-chain amino acid catabolic process; GO:0003674,molecular_function; GO:0003824,catalytic activity; GO:0016491,oxid…	PF00676.20:Dehydrogenase E1 component	--	--	--
TraesCS5B02G120100	TRUE	TRUE	FALSE	FALSE	5.97	6.75	6.56	6.42667	19.75	17.51	47.7	28.32	3.48	3.02	6.39	4.29667	19.54	5.55	14.42	13.17	5B	212784069	212797800	+	TraesCS5B02G120100	Aldehyde dehydrogenase [Source:UniProtKB/TrEMBL%3BAcc:A0A1D6DEZ5]	K00128 aldehyde dehydrogenase (NAD+) [EC:1.2.1.3] | (RefSeq) aldehyde dehydrogenase family 3 member H1-like (A)	ko00010: Glycolysis / Gluconeogenesis; ko00053: Ascorbate and aldarate metabolism; ko00071: Fatty acid degradation; ko00280: Valine, leucine and isoleucine degradation; ko00310: Lysine degradation; ko00330: Arginine and proline metabolism; ko00340: Histidine metabolism; ko00380: Tryptophan metabolism; ko00410: beta-Alanine metabolism; ko00561: Glycerolipid metabolism; ko00620: Pyruvate metabolism…	aldehyde dehydrogenase family 3 member H1-like [Aegilops tauschii subsp. tauschii]	AL3H1_ARATH RecName: Full=Aldehyde dehydrogenase family 3 member H1; Short=AtALDH4; Short=Ath-ALDH4; EC=1.2.1.3;	A0A446U159_TRITD RecName: Full=Aldehyde dehydrogenase {ECO:0000256|PIRNR:PIRNR036492};	At1g44170	GO:0005783,endoplasmic reticulum; GO:0005794,Golgi apparatus; GO:0005634,nucleus; GO:0009506,plasmodesma; GO:0009536,plastid; GO:0005773,vacuole; GO:0004028,3-chloroallyl aldehyde dehydrogenase activity; GO:0004029,aldehyde dehydrogenase (NAD+) activity; GO:0043878,glyceraldehyde-3-phosphate dehydrogenase (NAD+) (non-phosphorylating) activity; GO:0006081,cellular aldehyde metabolic process; GO:00…	PF00171.22:Aldehyde dehydrogenase family	--	--	--
TraesCS5A02G501800	TRUE	FALSE	FALSE	FALSE	9.73	7.25	8.08	8.35333	30.25	26.39	18.7	25.1133	13.43	18.95	14.98	15.7867	35.13	20.46	24.4	26.6633	5A	667071359	667077013	-	TraesCS5A02G501800	--	K00640 serine O-acetyltransferase [EC:2.3.1.30] | (RefSeq) probable serine acetyltransferase 2 (A)	ko00270: Cysteine and methionine metabolism; ko00920: Sulfur metabolism; ko01100: Metabolic pathways; ko01110: Biosynthesis of secondary metabolites; ko01200: Carbon metabolism; ko01230: Biosynthesis of amino acids	probable serine acetyltransferase 2 [Aegilops tauschii subsp. tauschii]	SAT2_ORYSJ RecName: Full=Probable serine acetyltransferase 2; EC=2.3.1.30; AltName: Full=OsSERAT3;1;	A0A3B6KT42_WHEAT RecName: Full=Serine O-acetyltransferase {ECO:0000256|ARBA:ARBA00013266}; EC=2.3.1.30 {ECO:0000256|ARBA:ARBA00013266};	At2g17640	GO:0005829,cytosol; GO:0009001,serine O-acetyltransferase activity; GO:0006535,cysteine biosynthetic process from serine; GO:0003674,molecular_function; GO:0003824,catalytic activity; GO:0008374,O-acyltransferase activity; GO:0016407,acetyltransferase activity; GO:0016412,serine O-acyltransferase activity; GO:0016413,O-acetyltransferase activity; GO:0016740,transferase activity; GO:0016746,transf…	PF06426.14:Serine acetyltransferase, N-terminal	--	--	--
TraesCS5A02G490100	TRUE	FALSE	FALSE	FALSE	0.22	0.37	0.26	0.283333	0.53	0.7	1.93	1.05333	0.13	0.1	0.21	0.146667	0.21	0.35	0.34	0.3	5A	659720577	659722360	+	TraesCS5A02G490100	--	K14677 aminoacylase [EC:3.5.1.14] | (RefSeq) uncharacterized protein LOC104719897 (A)	ko00220: Arginine biosynthesis; ko01100: Metabolic pathways; ko01110: Biosynthesis of secondary metabolites; ko01210: 2-Oxocarboxylic acid metabolism; ko01230: Biosynthesis of amino acids	uncharacterized protein LOC109741472 isoform X2 [Aegilops tauschii subsp. tauschii]	--	A0A446TM24_TRITD SubName: Full=Uncharacterized protein {ECO:0000313|EMBL:VAI24446.1};	At4g38220	--	--	--	--	--
TraesCS5A02G429100	TRUE	FALSE	TRUE	TRUE	3.48	4.05	5.28	4.27	6.22	6.76	16.8	9.92667	0.07	1.48	0.09	0.546667	0.05	0.08	0.25	0.126667	5A	613568423	613572788	+	TraesCS5A02G429100	--	K00850 6-phosphofructokinase 1 [EC:2.7.1.11] | (RefSeq) ATP-dependent 6-phosphofructokinase 6-like (A)	ko00010: Glycolysis / Gluconeogenesis; ko00030: Pentose phosphate pathway; ko00051: Fructose and mannose metabolism; ko00052: Galactose metabolism; ko01100: Metabolic pathways; ko01110: Biosynthesis of secondary metabolites; ko01200: Carbon metabolism; ko01230: Biosynthesis of amino acids; ko03018: RNA degradation	purine permease 3-like [Aegilops tauschii subsp. tauschii]	PUP3_ARATH RecName: Full=Purine permease 3; Short=AtPUP3;	A0A3B6KRF9_WHEAT RecName: Full=Probable purine permease {ECO:0000256|RuleBase:RU368015};	At1g28220	GO:0016021,integral component of membrane; GO:0016020,membrane; GO:0005345,purine nucleobase transmembrane transporter activity; GO:0015211,purine nucleoside transmembrane transporter activity; GO:0006863,purine nucleobase transport; GO:0003674,molecular_function; GO:0005215,transporter activity; GO:0008509,anion transmembrane transporter activity; GO:0015075,ion transmembrane transporter activit…	PF16913.5:Purine nucleobase transmembrane transport	--	--	--
TraesCS5A02G398300	TRUE	FALSE	FALSE	FALSE	8.56	5.88	5.76	6.73333	18.38	21.38	8.29	16.0167	9.47	21.74	8.26	13.1567	24.51	28.36	20.36	24.41	5A	592289532	592292881	+	TraesCS5A02G398300	--	K00133 aspartate-semialdehyde dehydrogenase [EC:1.2.1.11] | (RefSeq) aspartate-semialdehyde dehydrogenase-like (A)	ko00260: Glycine, serine and threonine metabolism; ko00261: Monobactam biosynthesis; ko00270: Cysteine and methionine metabolism; ko00300: Lysine biosynthesis; ko01100: Metabolic pathways; ko01110: Biosynthesis of secondary metabolites; ko01210: 2-Oxocarboxylic acid metabolism; ko01230: Biosynthesis of amino acids	uncharacterized protein LOC109743487 [Aegilops tauschii subsp. tauschii]	--	A0A3B6KPP9_WHEAT RecName: Full=Aspartate-semialdehyde dehydrogenase {ECO:0000256|ARBA:ARBA00013120}; EC=1.2.1.11 {ECO:0000256|ARBA:ARBA00013120};	At1g14810	GO:0004073,aspartate-semialdehyde dehydrogenase activity; GO:0051287,NAD binding; GO:0050661,NADP binding; GO:0046983,protein dimerization activity; GO:0009097,isoleucine biosynthetic process; GO:0009089,lysine biosynthetic process via diaminopimelate; GO:0009086,methionine biosynthetic process; GO:0009088,threonine biosynthetic process; GO:0003674,molecular_function; GO:0003824,catalytic activit…	PF02774.18:Semialdehyde dehydrogenase, dimerisation domain	--	--	--
TraesCS5A02G376700	TRUE	FALSE	FALSE	FALSE	1.66	1.96	2.33	1.98333	6.47	5.74	13.11	8.44	1.62	5.23	2.63	3.16	6.48	5.06	5.05	5.53	5A	574343361	574348079	+	TraesCS5A02G376700	--	K01968 3-methylcrotonyl-CoA carboxylase alpha subunit [EC:6.4.1.4] | (RefSeq) methylcrotonoyl-CoA carboxylase subunit alpha, mitochondrial (A)	ko00280: Valine, leucine and isoleucine degradation; ko01100: Metabolic pathways	serine/threonine-protein kinase HT1-like [Aegilops tauschii subsp. tauschii]	STY13_ARATH RecName: Full=Serine/threonine-protein kinase STY13 {ECO:0000305}; EC=2.7.11.1 {ECO:0000269|PubMed:16429265}; AltName: Full=AtSTYPK {ECO:0000303|PubMed:17291444}; AltName: Full=Serine/threonine/tyrosine-protein kinase 13 {ECO:0000303|PubMed:16429265};	A0A446TE61_TRITD RecName: Full=Protein kinase domain-containing protein {ECO:0000259|PROSITE:PS50011};	At3g22750	GO:0005737,cytoplasm; GO:0005886,plasma membrane; GO:0005524,ATP binding; GO:0004672,protein kinase activity; GO:0106310,protein serine kinase activity; GO:0004674,protein serine/threonine kinase activity; GO:0004712,protein serine/threonine/tyrosine kinase activity; GO:0106311,protein threonine kinase activity; GO:0004713,protein tyrosine kinase activity; GO:0006468,protein phosphorylation; GO:0…	PF07714.17:Protein tyrosine kinase	--	--	--
TraesCS5A02G358000	TRUE	FALSE	TRUE	FALSE	2.17	1.65	2.58	2.13333	0.95	0.78	1.22	0.983333	0.74	1.59	1.22	1.18333	1.61	1.53	1.07	1.40333	5A	559807006	559811406	-	TraesCS5A02G358000	--	K14152 phosphoribosyl-ATP pyrophosphohydrolase / phosphoribosyl-AMP cyclohydrolase / histidinol dehydrogenase [EC:3.6.1.31 3.5.4.19 1.1.1.23] | (RefSeq) uncharacterized protein LOC111783531 (A)	ko00340: Histidine metabolism; ko01100: Metabolic pathways; ko01110: Biosynthesis of secondary metabolites; ko01230: Biosynthesis of amino acids	uncharacterized protein LOC109736054 [Aegilops tauschii subsp. tauschii]	MS5L2_ARATH RecName: Full=Protein POLLENLESS 3-LIKE 2 {ECO:0000303|Ref.5};	A0A3B6KKV6_WHEAT RecName: Full=TPR_REGION domain-containing protein {ECO:0000259|PROSITE:PS50293};	At3g51280	GO:0005634,nucleus; GO:0007049,cell cycle; GO:0051301,cell division; GO:0008150,biological_process; GO:0009987,cellular process; GO:0005575,cellular_component; GO:0005622,intracellular anatomical structure; GO:0043226,organelle; GO:0043227,membrane-bounded organelle; GO:0043229,intracellular organelle; GO:0043231,intracellular membrane-bounded organelle; GO:0110165,cellular anatomical entity	PF00515.28:Tetratricopeptide repeat	--	--	--
TraesCS5A02G324200	TRUE	FALSE	FALSE	TRUE	7.74	5.07	5.62	6.14333	1.85	1.48	1.42	1.58333	10.56	16.2	9.35	12.0367	8.52	9.38	7.83	8.57667	5A	535574737	535579574	-	TraesCS5A02G324200	TIM [Source:Projected from Arabidopsis thaliana (AT2G21170) UniProtKB/TrEMBL%3BAcc:A0A178VN28]	K01803 triosephosphate isomerase (TIM) [EC:5.3.1.1] | (RefSeq) triosephosphate isomerase, chloroplastic (A)	ko00010: Glycolysis / Gluconeogenesis; ko00051: Fructose and mannose metabolism; ko00562: Inositol phosphate metabolism; ko00710: Carbon fixation in photosynthetic organisms; ko01100: Metabolic pathways; ko01110: Biosynthesis of secondary metabolites; ko01200: Carbon metabolism; ko01230: Biosynthesis of amino acids	predicted protein [Hordeum vulgare subsp. vulgare]	TPIC_SECCE RecName: Full=Triosephosphate isomerase, chloroplastic; Short=TIM; Short=Triose-phosphate isomerase; EC=5.3.1.1; Flags: Precursor;	A0A3B6KN33_WHEAT SubName: Full=Uncharacterized protein {ECO:0000313|EnsemblPlants:TraesCS5A02G324200.1};	At2g21170	GO:0009507,chloroplast; GO:0004807,triose-phosphate isomerase activity; GO:0006096,glycolytic process; GO:0019253,reductive pentose-phosphate cycle; GO:0003674,molecular_function; GO:0003824,catalytic activity; GO:0016853,isomerase activity; GO:0016860,intramolecular oxidoreductase activity; GO:0016861,intramolecular oxidoreductase activity, interconverting aldoses and ketoses; GO:0005975,carbohy…	PF00121.18:Triosephosphate isomerase	--	--	--
TraesCS5A02G247800	TRUE	TRUE	FALSE	FALSE	1.33	1.66	2.35	1.78	5.51	7.37	5.34	6.07333	0.41	2.5	0.9	1.27	4.71	2.5	3.02	3.41	5A	461847738	461850905	-	TraesCS5A02G247800	--	K00850 6-phosphofructokinase 1 [EC:2.7.1.11] | (RefSeq) ATP-dependent 6-phosphofructokinase 6-like (A)	ko00010: Glycolysis / Gluconeogenesis; ko00030: Pentose phosphate pathway; ko00051: Fructose and mannose metabolism; ko00052: Galactose metabolism; ko01100: Metabolic pathways; ko01110: Biosynthesis of secondary metabolites; ko01200: Carbon metabolism; ko01230: Biosynthesis of amino acids; ko03018: RNA degradation	purine permease 3-like [Aegilops tauschii subsp. tauschii]	PUP3_ARATH RecName: Full=Purine permease 3; Short=AtPUP3;	A0A446T599_TRITD RecName: Full=Probable purine permease {ECO:0000256|RuleBase:RU368015};	At1g28220	GO:0016021,integral component of membrane; GO:0016020,membrane; GO:0005345,purine nucleobase transmembrane transporter activity; GO:0015211,purine nucleoside transmembrane transporter activity; GO:0006863,purine nucleobase transport; GO:0003674,molecular_function; GO:0005215,transporter activity; GO:0008509,anion transmembrane transporter activity; GO:0015075,ion transmembrane transporter activit…	PF16913.5:Purine nucleobase transmembrane transport	--	--	--
TraesCS5A02G247600	TRUE	TRUE	TRUE	FALSE	4.25	4.76	7.23	5.41333	8.6	6.65	29.38	14.8767	1.14	1.04	2.51	1.56333	8.8	2.46	5.46	5.57333	5A	461585370	461588376	-	TraesCS5A02G247600	--	K00850 6-phosphofructokinase 1 [EC:2.7.1.11] | (RefSeq) ATP-dependent 6-phosphofructokinase 6-like (A)	ko00010: Glycolysis / Gluconeogenesis; ko00030: Pentose phosphate pathway; ko00051: Fructose and mannose metabolism; ko00052: Galactose metabolism; ko01100: Metabolic pathways; ko01110: Biosynthesis of secondary metabolites; ko01200: Carbon metabolism; ko01230: Biosynthesis of amino acids; ko03018: RNA degradation	purine permease 3-like [Aegilops tauschii subsp. tauschii]	PUP1_ARATH RecName: Full=Purine permease 1 {ECO:0000303|PubMed:10662864}; Short=AtPUP1 {ECO:0000303|PubMed:10662864};	A0A3B6KJU1_WHEAT RecName: Full=Probable purine permease {ECO:0000256|RuleBase:RU368015};	At1g28230	GO:0005887,integral component of plasma membrane; GO:0005345,purine nucleobase transmembrane transporter activity; GO:0015211,purine nucleoside transmembrane transporter activity; GO:0010184,cytokinin transport; GO:0006863,purine nucleobase transport; GO:0003674,molecular_function; GO:0005215,transporter activity; GO:0008509,anion transmembrane transporter activity; GO:0015075,ion transmembrane t…	PF16913.5:Purine nucleobase transmembrane transport	--	--	--
TraesCS5A02G177400	TRUE	TRUE	FALSE	FALSE	3.67	3.54	3.4	3.53667	1.73	2.28	1.02	1.67667	4.58	8.28	4.46	5.77333	0.97	2.9	2.37	2.08	5A	374891801	374905047	-	TraesCS5A02G177400	--	K12524 bifunctional aspartokinase / homoserine dehydrogenase 1 [EC:2.7.2.4 1.1.1.3] | (RefSeq) bifunctional aspartokinase/homoserine dehydrogenase 2, chloroplastic isoform X1 (A)	ko00260: Glycine, serine and threonine metabolism; ko00261: Monobactam biosynthesis; ko00270: Cysteine and methionine metabolism; ko00300: Lysine biosynthesis; ko01100: Metabolic pathways; ko01110: Biosynthesis of secondary metabolites; ko01230: Biosynthesis of amino acids	bifunctional aspartokinase/homoserine dehydrogenase 2, chloroplastic isoform X1 [Aegilops tauschii subsp. tauschii]	AKH2_MAIZE RecName: Full=Bifunctional aspartokinase/homoserine dehydrogenase 2, chloroplastic; Short=AK-HD 2; Short=AK-HSDH 2; Includes: RecName: Full=Aspartokinase; EC=2.7.2.4; Includes: RecName: Full=Homoserine dehydrogenase; EC=1.1.1.3; Flags: Precursor;	A0A3B6KHC1_WHEAT RecName: Full=Aspartokinase {ECO:0000256|ARBA:ARBA00016273}; EC=1.1.1.3 {ECO:0000256|ARBA:ARBA00013213}; EC=2.7.2.4 {ECO:0000256|ARBA:ARBA00013059}; AltName: Full=Homoserine dehydrogenase {ECO:0000256|ARBA:ARBA00013376};	At1g31230	GO:0009507,chloroplast; GO:0004072,aspartate kinase activity; GO:0005524,ATP binding; GO:0004412,homoserine dehydrogenase activity; GO:0050661,NADP binding; GO:0009067,aspartate family amino acid biosynthetic process; GO:0009090,homoserine biosynthetic process; GO:0009089,lysine biosynthetic process via diaminopimelate; GO:0009086,methionine biosynthetic process; GO:0009088,threonine biosynthetic…	PF00742.19:Homoserine dehydrogenase	--	--	--
TraesCS5A02G153900	TRUE	TRUE	FALSE	TRUE	32.4	35.23	37.63	35.0867	13.06	22.32	7.75	14.3767	26.11	28.75	19.62	24.8267	69.38	69.15	30.34	56.29	5A	331398338	331403028	+	TraesCS5A02G153900	--	K01953 asparagine synthase (glutamine-hydrolysing) [EC:6.3.5.4] | (RefSeq) asparagine synthetase [glutamine-hydrolyzing] (A)	ko00250: Alanine, aspartate and glutamate metabolism; ko01100: Metabolic pathways; ko01110: Biosynthesis of secondary metabolites; ko01230: Biosynthesis of amino acids	asparagine synthetase [Triticum turgidum subsp. durum]	ASNS_ASPOF RecName: Full=Asparagine synthetase [glutamine-hydrolyzing]; Short=AS; EC=6.3.5.4;	A0A446SYS2_TRITD RecName: Full=Asparagine synthetase [glutamine-hydrolyzing] {ECO:0000256|PIRNR:PIRNR001589}; EC=6.3.5.4 {ECO:0000256|PIRNR:PIRNR001589};	At3g47340	GO:0004066,asparagine synthase (glutamine-hydrolyzing) activity; GO:0005524,ATP binding; GO:0006541,glutamine metabolic process; GO:0070981,L-asparagine biosynthetic process; GO:0003674,molecular_function; GO:0003824,catalytic activity; GO:0016874,ligase activity; GO:0016879,ligase activity, forming carbon-nitrogen bonds; GO:0016884,carbon-nitrogen ligase activity, with glutamine as amido-N-donor…	PF00733.21:Asparagine synthase	--	--	--
TraesCS5A02G137700	TRUE	TRUE	FALSE	FALSE	2.55	2.13	1.67	2.11667	0.84	1.19	0.89	0.973333	1.92	5.53	3.41	3.62	0.67	0.8	1.16	0.876667	5A	309688666	309692392	-	TraesCS5A02G137700	--	K01640 hydroxymethylglutaryl-CoA lyase [EC:4.1.3.4] | (RefSeq) hydroxymethylglutaryl-CoA lyase, mitochondrial-like (A)	ko00280: Valine, leucine and isoleucine degradation; ko00650: Butanoate metabolism; ko01100: Metabolic pathways; ko01110: Biosynthesis of secondary metabolites; ko04146: Peroxisome	hydroxymethylglutaryl-CoA lyase, mitochondrial-like [Aegilops tauschii subsp. tauschii]	HMGCL_ARATH RecName: Full=Hydroxymethylglutaryl-CoA lyase, mitochondrial; Short=HL; Short=HMG-CoA lyase; EC=4.1.3.4; AltName: Full=3-hydroxy-3-methylglutarate-CoA lyase;	A0A453KC25_AEGTS RecName: Full=Hydroxymethylglutaryl-CoA lyase {ECO:0000256|ARBA:ARBA00012910}; EC=4.1.3.4 {ECO:0000256|ARBA:ARBA00012910};	At2g26800	GO:0005759,mitochondrial matrix; GO:0005739,mitochondrion; GO:0004419,hydroxymethylglutaryl-CoA lyase activity; GO:0046872,metal ion binding; GO:0046951,ketone body biosynthetic process; GO:0006552,leucine catabolic process; GO:0006629,lipid metabolic process; GO:0003674,molecular_function; GO:0003824,catalytic activity; GO:0016829,lyase activity; GO:0016830,carbon-carbon lyase activity; GO:00168…	PF00682.19:HMGL-like	--	--	--
TraesCS5A02G134000	TRUE	TRUE	FALSE	FALSE	106.05	112.34	111.88	110.09	33.26	37.63	36.48	35.79	74.12	106.35	112.95	97.8067	25.05	27.57	39.75	30.79	5A	301570377	301573655	-	TraesCS5A02G134000	Aluminum induced protein with YGL and LRDR motifs [Source:Projected from Arabidopsis thaliana (AT5G19140) UniProtKB/TrEMBL%3BAcc:Q94BR2]	K01953 asparagine synthase (glutamine-hydrolysing) [EC:6.3.5.4] | (RefSeq) asparagine synthetase [glutamine-hydrolyzing] 2-like (A)	ko00250: Alanine, aspartate and glutamate metabolism; ko01100: Metabolic pathways; ko01110: Biosynthesis of secondary metabolites; ko01230: Biosynthesis of amino acids	stem-specific protein TSJT1 [Aegilops tauschii subsp. tauschii]	TSJT1_TOBAC RecName: Full=Stem-specific protein TSJT1;	A0A446SX24_TRITD RecName: Full=DUF3700 domain-containing protein {ECO:0000259|SMART:SM01172};	At5g19140	--	PF12481.8:Aluminium induced protein	--	--	--
TraesCS4D02G347100	TRUE	FALSE	FALSE	FALSE	4.41	3.45	3.89	3.91667	6.33	5.64	19.38	10.45	4.48	3.09	4.57	4.04667	6.34	1.53	4.51	4.12667	4D	500823603	500829738	-	TraesCS4D02G347100	3-hydroxy-3-methylglutaryl coenzyme A synthase [Source:UniProtKB/TrEMBL%3BAcc:A0A1D5Y0C8]	K01641 hydroxymethylglutaryl-CoA synthase [EC:2.3.3.10] | (RefSeq) uncharacterized protein LOC123093812 (A)	ko00280: Valine, leucine and isoleucine degradation; ko00650: Butanoate metabolism; ko00900: Terpenoid backbone biosynthesis; ko01100: Metabolic pathways; ko01110: Biosynthesis of secondary metabolites	hydroxymethylglutaryl-CoA synthase-like [Aegilops tauschii subsp. tauschii]	HMCS_ARATH RecName: Full=Hydroxymethylglutaryl-CoA synthase; Short=HMG-CoA synthase; EC=2.3.3.10; AltName: Full=3-hydroxy-3-methylglutaryl coenzyme A synthase; AltName: Full=Protein EMBRYO DEFECTIVE 2778; AltName: Full=Protein FLAKY POLLEN 1;	A0A287PZN0_HORVV RecName: Full=3-hydroxy-3-methylglutaryl coenzyme A synthase {ECO:0000256|RuleBase:RU364071}; Short=HMG-CoA synthase {ECO:0000256|RuleBase:RU364071}; EC=2.3.3.10 {ECO:0000256|RuleBase:RU364071};	At4g11820	GO:0005829,cytosol; GO:0009506,plasmodesma; GO:0004421,hydroxymethylglutaryl-CoA synthase activity; GO:0006084,acetyl-CoA metabolic process; GO:0010142,farnesyl diphosphate biosynthetic process, mevalonate pathway; GO:0019287,isopentenyl diphosphate biosynthetic process, mevalonate pathway; GO:0016126,sterol biosynthetic process; GO:0003674,molecular_function; GO:0003824,catalytic activity; GO:00…	PF08540.10:Hydroxymethylglutaryl-coenzyme A synthase C terminal	--	--	--
TraesCS4D02G327200	TRUE	FALSE	FALSE	FALSE	14.52	11.13	10.59	12.08	37.53	36.71	20.53	31.59	16.73	18.4	15.99	17.04	40.5	27.14	25.01	30.8833	4D	486638931	486644509	-	TraesCS4D02G327200	--	K00640 serine O-acetyltransferase [EC:2.3.1.30] | (RefSeq) probable serine acetyltransferase 2 (A)	ko00270: Cysteine and methionine metabolism; ko00920: Sulfur metabolism; ko01100: Metabolic pathways; ko01110: Biosynthesis of secondary metabolites; ko01200: Carbon metabolism; ko01230: Biosynthesis of amino acids	probable serine acetyltransferase 2 [Aegilops tauschii subsp. tauschii]	SAT2_ORYSJ RecName: Full=Probable serine acetyltransferase 2; EC=2.3.1.30; AltName: Full=OsSERAT3;1;	A0A453J3X5_AEGTS RecName: Full=Serine O-acetyltransferase {ECO:0000256|ARBA:ARBA00013266}; EC=2.3.1.30 {ECO:0000256|ARBA:ARBA00013266};	At2g17640	GO:0005829,cytosol; GO:0009001,serine O-acetyltransferase activity; GO:0006535,cysteine biosynthetic process from serine; GO:0003674,molecular_function; GO:0003824,catalytic activity; GO:0008374,O-acyltransferase activity; GO:0016407,acetyltransferase activity; GO:0016412,serine O-acyltransferase activity; GO:0016413,O-acetyltransferase activity; GO:0016740,transferase activity; GO:0016746,transf…	PF06426.14:Serine acetyltransferase, N-terminal	--	--	--
TraesCS4D02G259900	TRUE	TRUE	FALSE	FALSE	4.36	5.18	5.36	4.96667	12.69	13.25	21.6	15.8467	3.19	4.05	4.79	4.01	11.76	4.99	9.62	8.79	4D	428970320	428972493	-	TraesCS4D02G259900	--	K00873 pyruvate kinase [EC:2.7.1.40] | (RefSeq) uncharacterized protein LOC118033103 isoform X1 (A)	ko00010: Glycolysis / Gluconeogenesis; ko00620: Pyruvate metabolism; ko01100: Metabolic pathways; ko01110: Biosynthesis of secondary metabolites; ko01200: Carbon metabolism; ko01230: Biosynthesis of amino acids	uncharacterized protein LOC109762295 [Aegilops tauschii subsp. tauschii]	--	A0A453IPW4_AEGTS SubName: Full=Uncharacterized protein {ECO:0000313|EnsemblPlants:AET4Gv20643800.3};	At5g54540	GO:0016021,integral component of membrane; GO:0005575,cellular_component; GO:0016020,membrane; GO:0031224,intrinsic component of membrane; GO:0110165,cellular anatomical entity	--	--	--	--
TraesCS4D02G236800	TRUE	FALSE	TRUE	FALSE	2.47	2.52	3.1	2.69667	1.25	0.9	1.85	1.33333	0.44	0.1	0.47	0.336667	0.84	0.32	0.71	0.623333	4D	398902851	398905458	+	TraesCS4D02G236800	Branched-chain-amino-acid aminotransferase [Source:UniProtKB/TrEMBL%3BAcc:A0A1D5XVR4]	K00826 branched-chain amino acid aminotransferase [EC:2.6.1.42] | (RefSeq) branched-chain-amino-acid aminotransferase 2, chloroplastic-like (A)	ko00270: Cysteine and methionine metabolism; ko00280: Valine, leucine and isoleucine degradation; ko00290: Valine, leucine and isoleucine biosynthesis; ko00770: Pantothenate and CoA biosynthesis; ko00966: Glucosinolate biosynthesis; ko01100: Metabolic pathways; ko01110: Biosynthesis of secondary metabolites; ko01210: 2-Oxocarboxylic acid metabolism; ko01230: Biosynthesis of amino acids; ko01240: …	branched-chain-amino-acid aminotransferase 2, chloroplastic-like [Aegilops tauschii subsp. tauschii]	BCAT3_ARATH RecName: Full=Branched-chain-amino-acid aminotransferase 3, chloroplastic {ECO:0000303|PubMed:12068099}; Short=Atbcat-3; EC=2.6.1.42; EC=2.6.1.88; Flags: Precursor;	A0A3B6JMM5_WHEAT RecName: Full=Branched-chain-amino-acid aminotransferase {ECO:0000256|RuleBase:RU004517}; EC=2.6.1.42 {ECO:0000256|RuleBase:RU004517};	At3g49680	GO:0009507,chloroplast; GO:0009570,chloroplast stroma; GO:0004084,branched-chain-amino-acid transaminase activity; GO:0052656,L-isoleucine transaminase activity; GO:0052654,L-leucine transaminase activity; GO:0050048,L-leucine:2-oxoglutarate aminotransferase activity; GO:0052655,L-valine transaminase activity; GO:0009097,isoleucine biosynthetic process; GO:0009098,leucine biosynthetic process; GO…	PF01063.19:Amino-transferase class IV	--	--	--
TraesCS4D02G213500	TRUE	TRUE	FALSE	FALSE	2.55	3	2.06	2.53667	6.64	5.77	9.56	7.32333	2.63	3.72	3.57	3.30667	6.39	9.05	7.54	7.66	4D	366317373	366322266	+	TraesCS4D02G213500	Cytosolic enolase 3 [Source:Projected from Arabidopsis thaliana (AT2G29560) UniProtKB/Swiss-Prot%3BAcc:Q9ZW34]	K01689 enolase [EC:4.2.1.11] | (RefSeq) cytosolic enolase 3-like (A)	ko00010: Glycolysis / Gluconeogenesis; ko01100: Metabolic pathways; ko01110: Biosynthesis of secondary metabolites; ko01200: Carbon metabolism; ko01230: Biosynthesis of amino acids; ko03018: RNA degradation	cytosolic enolase 3 isoform X2 [Aegilops tauschii subsp. tauschii]	ENO3_ARATH RecName: Full=Cytosolic enolase 3; EC=4.2.1.11; AltName: Full=2-phospho-D-glycerate hydro-lyase 3; AltName: Full=2-phosphoglycerate dehydratase 3;	A0A453IFA7_AEGTS RecName: Full=Phosphopyruvate hydratase {ECO:0000256|ARBA:ARBA00012058}; EC=4.2.1.11 {ECO:0000256|ARBA:ARBA00012058};	At2g29560	GO:0005737,cytoplasm; GO:0005829,cytosol; GO:0005634,nucleus; GO:0005777,peroxisome; GO:0000015,phosphopyruvate hydratase complex; GO:0000287,magnesium ion binding; GO:0004634,phosphopyruvate hydratase activity; GO:0006096,glycolytic process; GO:0032889,regulation of vacuole fusion, non-autophagic; GO:0003674,molecular_function; GO:0005488,binding; GO:0043167,ion binding; GO:0043169,cation bindin…	PF00113.22:Enolase, C-terminal TIM barrel domain	--	--	--
TraesCS4D02G204800	TRUE	FALSE	FALSE	FALSE	3.34	2.97	2.23	2.84667	1.09	1.83	0.89	1.27	1.92	2.09	1.46	1.82333	0.71	1.16	1.21	1.02667	4D	352437385	352441925	+	TraesCS4D02G204800	Arginine biosynthesis bifunctional protein ArgJ%2C chloroplastic [Source:UniProtKB/TrEMBL%3BAcc:W5EME1]	K00620 glutamate N-acetyltransferase / amino-acid N-acetyltransferase [EC:2.3.1.35 2.3.1.1] | (RefSeq) arginine biosynthesis bifunctional protein ArgJ, chloroplastic-like (A)	ko00220: Arginine biosynthesis; ko01100: Metabolic pathways; ko01110: Biosynthesis of secondary metabolites; ko01210: 2-Oxocarboxylic acid metabolism; ko01230: Biosynthesis of amino acids	arginine biosynthesis bifunctional protein ArgJ, chloroplastic [Aegilops tauschii subsp. tauschii]	ARGJ_ORYSI RecName: Full=Arginine biosynthesis bifunctional protein ArgJ, chloroplastic {ECO:0000255|HAMAP-Rule:MF_03124}; Includes: RecName: Full=Glutamate N-acetyltransferase {ECO:0000255|HAMAP-Rule:MF_03124}; Short=GAT {ECO:0000255|HAMAP-Rule:MF_03124}; EC=2.3.1.35 {ECO:0000255|HAMAP-Rule:MF_03124}; AltName: Full=Ornithine acetyltransferase {ECO:0000255|HAMAP-Rule:MF_03124}; Short=OATase {ECO:…	A0A453ID68_AEGTS RecName: Full=Arginine biosynthesis bifunctional protein ArgJ, chloroplastic {ECO:0000256|HAMAP-Rule:MF_03124}; Includes: RecName: Full=Glutamate N-acetyltransferase {ECO:0000256|HAMAP-Rule:MF_03124}; Short=GAT {ECO:0000256|HAMAP-Rule:MF_03124}; EC=2.3.1.35 {ECO:0000256|HAMAP-Rule:MF_03124}; AltName: Full=Ornithine acetyltransferase {ECO:0000256|HAMAP-Rule:MF_03124}; Short=OATase…	At2g37500	GO:0009507,chloroplast; GO:0004042,acetyl-CoA:L-glutamate N-acetyltransferase activity; GO:0004358,glutamate N-acetyltransferase activity; GO:0103045,methione N-acyltransferase activity; GO:0006526,arginine biosynthetic process; GO:0003674,molecular_function; GO:0003824,catalytic activity; GO:0008080,N-acetyltransferase activity; GO:0016407,acetyltransferase activity; GO:0016410,N-acyltransferase…	PF01960.18:ArgJ family	--	--	--
TraesCS4D02G107400	TRUE	TRUE	FALSE	FALSE	0.43	0.13	0.3	0.286667	0.7	0.69	1.11	0.833333	0	0.05	0.29	0.113333	1.22	1.74	0.66	1.20667	4D	85590767	85593832	+	TraesCS4D02G107400	Fructose-bisphosphate aldolase [Source:UniProtKB/TrEMBL%3BAcc:W5ETU1]	K01623 fructose-bisphosphate aldolase, class I [EC:4.1.2.13] | (RefSeq) fructose-bisphosphate aldolase, chloroplastic (A)	ko00010: Glycolysis / Gluconeogenesis; ko00030: Pentose phosphate pathway; ko00051: Fructose and mannose metabolism; ko00710: Carbon fixation in photosynthetic organisms; ko01100: Metabolic pathways; ko01110: Biosynthesis of secondary metabolites; ko01200: Carbon metabolism; ko01230: Biosynthesis of amino acids	fructose-bisphosphate aldolase, chloroplastic [Aegilops tauschii subsp. tauschii]	ALFP_ORYSJ RecName: Full=Fructose-bisphosphate aldolase, chloroplastic {ECO:0000305}; EC=4.1.2.13 {ECO:0000305}; AltName: Full=Chloroplastic aldolase {ECO:0000303|PubMed:8163192}; Short=AldP {ECO:0000303|PubMed:8163192}; Flags: Precursor;	W5ETU1_WHEAT RecName: Full=Fructose-bisphosphate aldolase {ECO:0000256|ARBA:ARBA00013068, ECO:0000256|RuleBase:RU003994}; EC=4.1.2.13 {ECO:0000256|ARBA:ARBA00013068, ECO:0000256|RuleBase:RU003994};	At2g01140	GO:0005737,cytoplasm; GO:0005829,cytosol; GO:0010287,plastoglobule; GO:0004332,fructose-bisphosphate aldolase activity; GO:0030388,fructose 1,6-bisphosphate metabolic process; GO:0006094,gluconeogenesis; GO:0006096,glycolytic process; GO:0003674,molecular_function; GO:0003824,catalytic activity; GO:0016829,lyase activity; GO:0016830,carbon-carbon lyase activity; GO:0016832,aldehyde-lyase activity…	PF00274.19:Fructose-bisphosphate aldolase class-I	--	--	--
TraesCS4D02G047500	TRUE	FALSE	FALSE	FALSE	8.27	6.87	6.96	7.36667	20.06	21.04	18.22	19.7733	9.04	12.63	9.63	10.4333	15.15	16.31	16.79	16.0833	4D	23316722	23323910	+	TraesCS4D02G047500	Threonine dehydratase [Source:UniProtKB/TrEMBL%3BAcc:A0A341UNG6]	K01754 threonine dehydratase [EC:4.3.1.19] | (RefSeq) threonine dehydratase 1 biosynthetic, chloroplastic-like (A)	ko00260: Glycine, serine and threonine metabolism; ko00290: Valine, leucine and isoleucine biosynthesis; ko01100: Metabolic pathways; ko01110: Biosynthesis of secondary metabolites; ko01200: Carbon metabolism; ko01230: Biosynthesis of amino acids	threonine dehydratase biosynthetic, chloroplastic [Aegilops tauschii subsp. tauschii]	TD1_SOLLC RecName: Full=Threonine dehydratase 1 biosynthetic, chloroplastic {ECO:0000305}; EC=4.3.1.19 {ECO:0000255|RuleBase:RU362012, ECO:0000269|PubMed:21436043}; AltName: Full=SlTD1 {ECO:0000303|PubMed:17416643}; AltName: Full=Threonine deaminase 1 {ECO:0000303|PubMed:21436043}; Flags: Precursor;	A0A453H7E5_AEGTS RecName: Full=Threonine dehydratase {ECO:0000256|RuleBase:RU362012}; EC=4.3.1.19 {ECO:0000256|RuleBase:RU362012}; AltName: Full=Threonine deaminase {ECO:0000256|RuleBase:RU362012};	At3g10050	GO:0009507,chloroplast; GO:0004794,L-threonine ammonia-lyase activity; GO:0030170,pyridoxal phosphate binding; GO:0008652,cellular amino acid biosynthetic process; GO:0009097,isoleucine biosynthetic process; GO:0006567,threonine catabolic process; GO:0003674,molecular_function; GO:0003824,catalytic activity; GO:0016829,lyase activity; GO:0016840,carbon-nitrogen lyase activity; GO:0016841,ammonia-…	PF00291.25:Pyridoxal-phosphate dependent enzyme	--	--	--
TraesCS4D02G047400	TRUE	TRUE	FALSE	TRUE	20.52	18.44	18.89	19.2833	111.8	125.4	63.89	100.363	37.16	52.23	39.17	42.8533	199.75	286.03	212.54	232.773	4D	22946578	22949866	-	TraesCS4D02G047400	Glutamine synthetase [Source:UniProtKB/TrEMBL%3BAcc:Q6RUJ0]	K01915 glutamine synthetase [EC:6.3.1.2] | (RefSeq) glutamine synthetase cytosolic isozyme 1-3 (A)	ko00220: Arginine biosynthesis; ko00250: Alanine, aspartate and glutamate metabolism; ko00630: Glyoxylate and dicarboxylate metabolism; ko00910: Nitrogen metabolism; ko01100: Metabolic pathways; ko01230: Biosynthesis of amino acids	glutamine synthetase isoform GSe1 [Triticum aestivum]	GLN13_ORYSJ RecName: Full=Glutamine synthetase cytosolic isozyme 1-3 {ECO:0000305}; EC=6.3.1.2 {ECO:0000250|UniProtKB:P14656}; AltName: Full=Glutamate--ammonia ligase GLN1;3 {ECO:0000305}; Short=OsGLN1;3 {ECO:0000305}; AltName: Full=OsGS1;3 {ECO:0000303|PubMed:15918879};	A0A453H7L2_AEGTS RecName: Full=Glutamine synthetase {ECO:0000256|ARBA:ARBA00012937, ECO:0000256|RuleBase:RU004356}; EC=6.3.1.2 {ECO:0000256|ARBA:ARBA00012937, ECO:0000256|RuleBase:RU004356};	At1g66200	GO:0005737,cytoplasm; GO:0005524,ATP binding; GO:0004356,glutamate-ammonia ligase activity; GO:0006542,glutamine biosynthetic process; GO:0000166,nucleotide binding; GO:0003674,molecular_function; GO:0005488,binding; GO:0017076,purine nucleotide binding; GO:0030554,adenyl nucleotide binding; GO:0032553,ribonucleotide binding; GO:0032555,purine ribonucleotide binding; GO:0032559,adenyl ribonucleot…	PF00120.24:Glutamine synthetase, catalytic domain	--	--	--
TraesCS4D02G045300	TRUE	TRUE	FALSE	FALSE	1.13	0.99	1.22	1.11333	3.22	4.79	3.32	3.77667	0.8	2.28	1.73	1.60333	4.58	4.9	5.06	4.84667	4D	20564256	20566222	-	TraesCS4D02G045300	--	K00827 alanine-glyoxylate transaminase / (R)-3-amino-2-methylpropionate-pyruvate transaminase [EC:2.6.1.44 2.6.1.40] | (RefSeq) alanine--glyoxylate aminotransferase 2 homolog 1, mitochondrial isoform X1 (A)	ko00250: Alanine, aspartate and glutamate metabolism; ko00260: Glycine, serine and threonine metabolism; ko00270: Cysteine and methionine metabolism; ko00280: Valine, leucine and isoleucine degradation; ko01100: Metabolic pathways; ko01110: Biosynthesis of secondary metabolites	ACD11 homolog protein [Aegilops tauschii subsp. tauschii]	ACDH_ARATH RecName: Full=ACD11 homolog protein {ECO:0000303|PubMed:18657186}; AltName: Full=Probable ceramide-1-phosphate transfer protein {ECO:0000305};	A0A1D5Y806_WHEAT RecName: Full=GLTP domain-containing protein {ECO:0000259|Pfam:PF08718};	At4g39670	GO:0005737,cytoplasm; GO:0005829,cytosol; GO:0016020,membrane; GO:0005634,nucleus; GO:1902387,ceramide 1-phosphate binding; GO:1902388,ceramide 1-phosphate transfer activity; GO:0035627,ceramide transport; GO:0120009,intermembrane lipid transfer; GO:0003674,molecular_function; GO:0005488,binding; GO:0005543,phospholipid binding; GO:0008289,lipid binding; GO:0033218,amide binding; GO:0043167,ion b…	PF08718.11:Glycolipid transfer protein (GLTP)	--	--	--
TraesCS4D02G014300	TRUE	FALSE	FALSE	FALSE	162.59	137.59	143.36	147.847	399.78	378.18	254.55	344.17	264.5	235.26	222.42	240.727	460.55	325.72	310.44	365.57	4D	6574021	6576534	-	TraesCS4D02G014300	--	K00600 glycine hydroxymethyltransferase [EC:2.1.2.1] | (RefSeq) serine hydroxymethyltransferase 4-like (A)	ko00260: Glycine, serine and threonine metabolism; ko00460: Cyanoamino acid metabolism; ko00630: Glyoxylate and dicarboxylate metabolism; ko00670: One carbon pool by folate; ko01100: Metabolic pathways; ko01110: Biosynthesis of secondary metabolites; ko01200: Carbon metabolism; ko01230: Biosynthesis of amino acids; ko01240: Biosynthesis of cofactors	uncharacterized protein LOC109747833 [Aegilops tauschii subsp. tauschii]	--	A0A3B6JED4_WHEAT RecName: Full=VOC domain-containing protein {ECO:0000259|PROSITE:PS51819};	At2g32090	--	PF00903.25:Glyoxalase/Bleomycin resistance protein/Dioxygenase superfamily	--	--	--
TraesCS4B02G330300	TRUE	TRUE	FALSE	FALSE	18.91	12.93	13.68	15.1733	56.26	52.44	31.15	46.6167	23.23	22.05	24.02	23.1	65.53	41.61	45.5	50.88	4B	621326837	621332216	-	TraesCS4B02G330300	--	K00640 serine O-acetyltransferase [EC:2.3.1.30] | (RefSeq) probable serine acetyltransferase 2 (A)	ko00270: Cysteine and methionine metabolism; ko00920: Sulfur metabolism; ko01100: Metabolic pathways; ko01110: Biosynthesis of secondary metabolites; ko01200: Carbon metabolism; ko01230: Biosynthesis of amino acids	serine acetyltransferase [Triticum turgidum subsp. durum]	SAT2_ORYSJ RecName: Full=Probable serine acetyltransferase 2; EC=2.3.1.30; AltName: Full=OsSERAT3;1;	A0A3B6IYA1_WHEAT RecName: Full=Serine O-acetyltransferase {ECO:0000256|ARBA:ARBA00013266}; EC=2.3.1.30 {ECO:0000256|ARBA:ARBA00013266};	At2g17640	GO:0005829,cytosol; GO:0009001,serine O-acetyltransferase activity; GO:0006535,cysteine biosynthetic process from serine; GO:0003674,molecular_function; GO:0003824,catalytic activity; GO:0008374,O-acyltransferase activity; GO:0016407,acetyltransferase activity; GO:0016412,serine O-acyltransferase activity; GO:0016413,O-acetyltransferase activity; GO:0016740,transferase activity; GO:0016746,transf…	PF06426.14:Serine acetyltransferase, N-terminal	--	--	--
TraesCS4B02G321900	TRUE	FALSE	FALSE	TRUE	0	0.29	0.19	0.16	1	1.18	0.81	0.996667	0.22	0.16	0.19	0.19	0.23	0.32	0.26	0.27	4B	612759860	612765476	-	TraesCS4B02G321900	--	K14677 aminoacylase [EC:3.5.1.14] | (RefSeq) uncharacterized protein LOC104719897 (A)	ko00220: Arginine biosynthesis; ko01100: Metabolic pathways; ko01110: Biosynthesis of secondary metabolites; ko01210: 2-Oxocarboxylic acid metabolism; ko01230: Biosynthesis of amino acids	uncharacterized protein LOC109741472 isoform X2 [Aegilops tauschii subsp. tauschii]	CDPK7_ORYSJ RecName: Full=Calcium-dependent protein kinase 7 {ECO:0000305}; Short=OsCDPK7 {ECO:0000305}; Short=OsCPK7 {ECO:0000303|PubMed:15695435}; EC=2.7.11.1 {ECO:0000305}; AltName: Full=Calcium-dependent protein kinase OsCDPK1 {ECO:0000303|Ref.4}; AltName: Full=Calcium-dependent protein kinase OsCDPK13 {ECO:0000303|PubMed:15604699, ECO:0000303|Ref.2}; AltName: Full=Calcium-dependent protein k…	A0A446SGA5_TRITD SubName: Full=Uncharacterized protein {ECO:0000313|EMBL:VAI10142.1};	At4g38220	GO:0005737,cytoplasm; GO:0005829,cytosol; GO:0005634,nucleus; GO:0005886,plasma membrane; GO:0005524,ATP binding; GO:0005509,calcium ion binding; GO:0009931,calcium-dependent protein serine/threonine kinase activity; GO:0005516,calmodulin binding; GO:0004683,calmodulin-dependent protein kinase activity; GO:0106310,protein serine kinase activity; GO:0106311,protein threonine kinase activity; GO:00…	--	--	--	--
TraesCS4B02G285000	TRUE	FALSE	FALSE	FALSE	7.12	5.36	4.54	5.67333	9.69	8.62	16.88	11.73	6.48	5.84	4.73	5.68333	9.1	6.72	6.49	7.43667	4B	568555627	568559531	+	TraesCS4B02G285000	Ribulose-phosphate 3-epimerase [Source:UniProtKB/TrEMBL%3BAcc:W5E5Z3]	K01783 ribulose-phosphate 3-epimerase [EC:5.1.3.1] | (RefSeq) ribulose-phosphate 3-epimerase, chloroplastic (A)	ko00030: Pentose phosphate pathway; ko00040: Pentose and glucuronate interconversions; ko00710: Carbon fixation in photosynthetic organisms; ko01100: Metabolic pathways; ko01110: Biosynthesis of secondary metabolites; ko01200: Carbon metabolism; ko01230: Biosynthesis of amino acids	ribulose-phosphate 3-epimerase, chloroplastic [Aegilops tauschii subsp. tauschii]	RPE_ORYSJ RecName: Full=Ribulose-phosphate 3-epimerase, chloroplastic; EC=5.1.3.1 {ECO:0000250|UniProtKB:Q43157}; AltName: Full=Pentose-5-phosphate 3-epimerase; Short=PPE; AltName: Full=R5P3E; Short=RPE; Flags: Precursor;	W5E5Z3_WHEAT RecName: Full=Ribulose-phosphate 3-epimerase {ECO:0000256|PIRNR:PIRNR001461}; EC=5.1.3.1 {ECO:0000256|PIRNR:PIRNR001461};	At5g61410	GO:0009535,chloroplast thylakoid membrane; GO:0005829,cytosol; GO:0046872,metal ion binding; GO:0004750,ribulose-phosphate 3-epimerase activity; GO:0044262,cellular carbohydrate metabolic process; GO:0019323,pentose catabolic process; GO:0009052,pentose-phosphate shunt, non-oxidative branch; GO:0019253,reductive pentose-phosphate cycle; GO:0003674,molecular_function; GO:0005488,binding; GO:004316…	PF00834.19:Ribulose-phosphate 3 epimerase family	--	--	--
TraesCS4B02G260200	TRUE	TRUE	FALSE	FALSE	6.62	4.53	4.08	5.07667	30.14	20.79	35.94	28.9567	5.01	5.4	6.22	5.54333	22.93	8.4	17.83	16.3867	4B	527008887	527011147	-	TraesCS4B02G260200	--	K00873 pyruvate kinase [EC:2.7.1.40] | (RefSeq) uncharacterized protein LOC118033103 isoform X1 (A)	ko00010: Glycolysis / Gluconeogenesis; ko00620: Pyruvate metabolism; ko01100: Metabolic pathways; ko01110: Biosynthesis of secondary metabolites; ko01200: Carbon metabolism; ko01230: Biosynthesis of amino acids	uncharacterized protein LOC109762295 [Aegilops tauschii subsp. tauschii]	--	A0A446SC31_TRITD SubName: Full=Uncharacterized protein {ECO:0000313|EMBL:VAI08708.1};	At5g54540	GO:0016021,integral component of membrane; GO:0005575,cellular_component; GO:0016020,membrane; GO:0031224,intrinsic component of membrane; GO:0110165,cellular anatomical entity	--	--	--	--
TraesCS4B02G240900	TRUE	FALSE	FALSE	TRUE	0.59	0.72	1.64	0.983333	3.9	3.49	2.45	3.28	0.59	0.74	0.86	0.73	0.2	0.18	0.97	0.45	4B	499898695	499901767	+	TraesCS4B02G240900	Glutamine synthetase [Source:UniProtKB/TrEMBL%3BAcc:Q6RUJ2]	K01915 glutamine synthetase [EC:6.3.1.2] | (RefSeq) glutamine synthetase cytosolic isozyme 1-2 (A)	ko00220: Arginine biosynthesis; ko00250: Alanine, aspartate and glutamate metabolism; ko00630: Glyoxylate and dicarboxylate metabolism; ko00910: Nitrogen metabolism; ko01100: Metabolic pathways; ko01230: Biosynthesis of amino acids	glutamine synthetase isoform GSr1 [Triticum aestivum]	GLN12_ORYSJ RecName: Full=Glutamine synthetase cytosolic isozyme 1-2 {ECO:0000305}; EC=6.3.1.2 {ECO:0000269|PubMed:15574840}; AltName: Full=Glutamate--ammonia ligase GLN1;2 {ECO:0000305}; Short=OsGLN1;2 {ECO:0000303|PubMed:15574840}; AltName: Full=Glutamine synthetase root isozyme {ECO:0000305}; AltName: Full=OsGS1;2 {ECO:0000312|EMBL:BAD77931.1};	Q6RUJ2_WHEAT RecName: Full=Glutamine synthetase {ECO:0000256|ARBA:ARBA00012937, ECO:0000256|RuleBase:RU004356}; EC=6.3.1.2 {ECO:0000256|ARBA:ARBA00012937, ECO:0000256|RuleBase:RU004356};	At5g37600	GO:0005737,cytoplasm; GO:0005524,ATP binding; GO:0004356,glutamate-ammonia ligase activity; GO:0006542,glutamine biosynthetic process; GO:0000166,nucleotide binding; GO:0003674,molecular_function; GO:0005488,binding; GO:0017076,purine nucleotide binding; GO:0030554,adenyl nucleotide binding; GO:0032553,ribonucleotide binding; GO:0032555,purine ribonucleotide binding; GO:0032559,adenyl ribonucleot…	PF00120.24:Glutamine synthetase, catalytic domain	--	--	--
TraesCS4B02G235400	TRUE	FALSE	TRUE	FALSE	2.3	2.95	2.4	2.55	0.33	0.33	0.65	0.436667	0.43	0.05	0.23	0.236667	0.35	0.2	0.19	0.246667	4B	491790771	491799486	+	TraesCS4B02G235400	Branched-chain-amino-acid aminotransferase [Source:UniProtKB/TrEMBL%3BAcc:A0A1D5XL05]	K00826 branched-chain amino acid aminotransferase [EC:2.6.1.42] | (RefSeq) branched-chain-amino-acid aminotransferase 2, chloroplastic-like (A)	ko00270: Cysteine and methionine metabolism; ko00280: Valine, leucine and isoleucine degradation; ko00290: Valine, leucine and isoleucine biosynthesis; ko00770: Pantothenate and CoA biosynthesis; ko00966: Glucosinolate biosynthesis; ko01100: Metabolic pathways; ko01110: Biosynthesis of secondary metabolites; ko01210: 2-Oxocarboxylic acid metabolism; ko01230: Biosynthesis of amino acids; ko01240: …	Branched-chain-amino-acid aminotransferase 3, chloroplastic [Triticum urartu]	BCAT3_ARATH RecName: Full=Branched-chain-amino-acid aminotransferase 3, chloroplastic {ECO:0000303|PubMed:12068099}; Short=Atbcat-3; EC=2.6.1.42; EC=2.6.1.88; Flags: Precursor;	A0A3B6ITA9_WHEAT RecName: Full=Branched-chain-amino-acid aminotransferase {ECO:0000256|RuleBase:RU004517}; EC=2.6.1.42 {ECO:0000256|RuleBase:RU004517};	At3g49680	GO:0009507,chloroplast; GO:0009570,chloroplast stroma; GO:0004084,branched-chain-amino-acid transaminase activity; GO:0052656,L-isoleucine transaminase activity; GO:0052654,L-leucine transaminase activity; GO:0050048,L-leucine:2-oxoglutarate aminotransferase activity; GO:0052655,L-valine transaminase activity; GO:0009097,isoleucine biosynthetic process; GO:0009098,leucine biosynthetic process; GO…	PF01063.19:Amino-transferase class IV	--	--	--
TraesCS4B02G212500	TRUE	TRUE	FALSE	FALSE	3.61	3.49	2.7	3.26667	7.91	8.38	8.05	8.11333	3.82	7.04	4.57	5.14333	12.46	11.93	9.05	11.1467	4B	450908961	450913912	+	TraesCS4B02G212500	--	K01689 enolase [EC:4.2.1.11] | (RefSeq) cytosolic enolase 3-like (A)	ko00010: Glycolysis / Gluconeogenesis; ko01100: Metabolic pathways; ko01110: Biosynthesis of secondary metabolites; ko01200: Carbon metabolism; ko01230: Biosynthesis of amino acids; ko03018: RNA degradation	cytosolic enolase 3 isoform X2 [Aegilops tauschii subsp. tauschii]	ENO3_ARATH RecName: Full=Cytosolic enolase 3; EC=4.2.1.11; AltName: Full=2-phospho-D-glycerate hydro-lyase 3; AltName: Full=2-phosphoglycerate dehydratase 3;	A0A453IFA7_AEGTS RecName: Full=Phosphopyruvate hydratase {ECO:0000256|ARBA:ARBA00012058}; EC=4.2.1.11 {ECO:0000256|ARBA:ARBA00012058};	At2g29560	GO:0005737,cytoplasm; GO:0005829,cytosol; GO:0005634,nucleus; GO:0005777,peroxisome; GO:0000015,phosphopyruvate hydratase complex; GO:0000287,magnesium ion binding; GO:0004634,phosphopyruvate hydratase activity; GO:0006096,glycolytic process; GO:0032889,regulation of vacuole fusion, non-autophagic; GO:0003674,molecular_function; GO:0005488,binding; GO:0043167,ion binding; GO:0043169,cation bindin…	PF00113.22:Enolase, C-terminal TIM barrel domain	--	--	--
TraesCS4B02G165500	TRUE	FALSE	FALSE	TRUE	7.56	10.43	7.31	8.43333	14.57	14.33	24.25	17.7167	7.46	0.28	6.3	4.68	10.98	5.31	3.68	6.65667	4B	349568711	349600913	-	TraesCS4B02G165500	--	K00873 pyruvate kinase [EC:2.7.1.40] | (RefSeq) pyruvate kinase isozyme A, chloroplastic-like isoform X1 (A)	ko00010: Glycolysis / Gluconeogenesis; ko00620: Pyruvate metabolism; ko01100: Metabolic pathways; ko01110: Biosynthesis of secondary metabolites; ko01200: Carbon metabolism; ko01230: Biosynthesis of amino acids	uncharacterized protein LOC109757285 [Aegilops tauschii subsp. tauschii]	--	A0A3B6IP83_WHEAT SubName: Full=Uncharacterized protein {ECO:0000313|EnsemblPlants:TraesCS4B02G165500.1};	At1g50020	GO:0016021,integral component of membrane; GO:0005575,cellular_component; GO:0016020,membrane; GO:0031224,intrinsic component of membrane; GO:0110165,cellular anatomical entity	--	--	--	--
TraesCS4B02G125000	TRUE	TRUE	FALSE	FALSE	12	9.95	6.68	9.54333	3.29	6.04	3.76	4.36333	16.69	13.5	12.38	14.19	6.23	8.5	5.12	6.61667	4B	152080875	152081210	-	TraesCS4B02G125000	--	K00850 6-phosphofructokinase 1 [EC:2.7.1.11] | (RefSeq) ATP-dependent 6-phosphofructokinase 2 (A)	ko00010: Glycolysis / Gluconeogenesis; ko00030: Pentose phosphate pathway; ko00051: Fructose and mannose metabolism; ko00052: Galactose metabolism; ko01100: Metabolic pathways; ko01110: Biosynthesis of secondary metabolites; ko01200: Carbon metabolism; ko01230: Biosynthesis of amino acids; ko03018: RNA degradation	predicted protein [Hordeum vulgare subsp. vulgare]	PFKA2_ARATH RecName: Full=ATP-dependent 6-phosphofructokinase 2 {ECO:0000255|HAMAP-Rule:MF_03186}; Short=ATP-PFK 2 {ECO:0000255|HAMAP-Rule:MF_03186}; Short=Phosphofructokinase 2 {ECO:0000255|HAMAP-Rule:MF_03186}; EC=2.7.1.11 {ECO:0000255|HAMAP-Rule:MF_03186}; AltName: Full=Phosphohexokinase 2 {ECO:0000255|HAMAP-Rule:MF_03186};	A0A446RYS2_TRITD SubName: Full=Uncharacterized protein {ECO:0000313|EMBL:VAI03893.1};	At5g47810	GO:0005737,cytoplasm; GO:0005829,cytosol; GO:0003872,6-phosphofructokinase activity; GO:0005524,ATP binding; GO:0046872,metal ion binding; GO:0006002,fructose 6-phosphate metabolic process; GO:0006096,glycolytic process; GO:0003674,molecular_function; GO:0003824,catalytic activity; GO:0008443,phosphofructokinase activity; GO:0016301,kinase activity; GO:0016740,transferase activity; GO:0016772,tra…	PF18565.1:Glycoside hydrolase family 2 C-terminal domain 5	--	--	--
TraesCS4B02G047400	TRUE	TRUE	FALSE	FALSE	33.32	35.49	34.4	34.4033	114.99	133.87	58.42	102.427	27.18	32.83	29.05	29.6867	79.72	77.29	113.65	90.22	4B	34722272	34725256	-	TraesCS4B02G047400	Glutamine synthetase [Source:UniProtKB/TrEMBL%3BAcc:Q6RUI9]	K01915 glutamine synthetase [EC:6.3.1.2] | (RefSeq) glutamine synthetase cytosolic isozyme 1-3-like (A)	ko00220: Arginine biosynthesis; ko00250: Alanine, aspartate and glutamate metabolism; ko00630: Glyoxylate and dicarboxylate metabolism; ko00910: Nitrogen metabolism; ko01100: Metabolic pathways; ko01230: Biosynthesis of amino acids	glutamine synthetase isoform GSe2 [Triticum aestivum]	GLN13_ORYSJ RecName: Full=Glutamine synthetase cytosolic isozyme 1-3 {ECO:0000305}; EC=6.3.1.2 {ECO:0000250|UniProtKB:P14656}; AltName: Full=Glutamate--ammonia ligase GLN1;3 {ECO:0000305}; Short=OsGLN1;3 {ECO:0000305}; AltName: Full=OsGS1;3 {ECO:0000303|PubMed:15918879};	Q6RUI9_WHEAT RecName: Full=Glutamine synthetase {ECO:0000256|ARBA:ARBA00012937, ECO:0000256|RuleBase:RU004356}; EC=6.3.1.2 {ECO:0000256|ARBA:ARBA00012937, ECO:0000256|RuleBase:RU004356};	At1g66200	GO:0005737,cytoplasm; GO:0005524,ATP binding; GO:0004356,glutamate-ammonia ligase activity; GO:0006542,glutamine biosynthetic process; GO:0000166,nucleotide binding; GO:0003674,molecular_function; GO:0005488,binding; GO:0017076,purine nucleotide binding; GO:0030554,adenyl nucleotide binding; GO:0032553,ribonucleotide binding; GO:0032555,purine ribonucleotide binding; GO:0032559,adenyl ribonucleot…	PF00120.24:Glutamine synthetase, catalytic domain	--	--	--
TraesCS4B02G045400	TRUE	TRUE	FALSE	FALSE	0.33	0.19	0.52	0.346667	3.48	3.91	5.45	4.28	0.43	1.8	0.67	0.966667	5.06	4.01	5.16	4.74333	4B	32496304	32498444	-	TraesCS4B02G045400	--	K00827 alanine-glyoxylate transaminase / (R)-3-amino-2-methylpropionate-pyruvate transaminase [EC:2.6.1.44 2.6.1.40] | (RefSeq) alanine--glyoxylate aminotransferase 2 homolog 1, mitochondrial isoform X1 (A)	ko00250: Alanine, aspartate and glutamate metabolism; ko00260: Glycine, serine and threonine metabolism; ko00270: Cysteine and methionine metabolism; ko00280: Valine, leucine and isoleucine degradation; ko01100: Metabolic pathways; ko01110: Biosynthesis of secondary metabolites	ACD11 homolog protein [Aegilops tauschii subsp. tauschii]	ACDH_ARATH RecName: Full=ACD11 homolog protein {ECO:0000303|PubMed:18657186}; AltName: Full=Probable ceramide-1-phosphate transfer protein {ECO:0000305};	A0A3B6ILD7_WHEAT RecName: Full=GLTP domain-containing protein {ECO:0000259|Pfam:PF08718};	At4g39670	GO:0005737,cytoplasm; GO:0005829,cytosol; GO:0016020,membrane; GO:0005634,nucleus; GO:1902387,ceramide 1-phosphate binding; GO:1902388,ceramide 1-phosphate transfer activity; GO:0035627,ceramide transport; GO:0120009,intermembrane lipid transfer; GO:0003674,molecular_function; GO:0005488,binding; GO:0005543,phospholipid binding; GO:0008289,lipid binding; GO:0033218,amide binding; GO:0043167,ion b…	PF08718.11:Glycolipid transfer protein (GLTP)	--	--	--
TraesCS4A02G366700	TRUE	FALSE	FALSE	FALSE	0.31	0.51	0.23	0.35	0.68	0.79	1.37	0.946667	0.67	1.1	1	0.923333	0.6	1.57	1.04	1.07	4A	640002357	640006923	+	TraesCS4A02G366700	--	K01681 aconitate hydratase [EC:4.2.1.3] | (RefSeq) putative aconitate hydratase, cytoplasmic (A)	ko00020: Citrate cycle (TCA cycle); ko00630: Glyoxylate and dicarboxylate metabolism; ko01100: Metabolic pathways; ko01110: Biosynthesis of secondary metabolites; ko01200: Carbon metabolism; ko01210: 2-Oxocarboxylic acid metabolism; ko01230: Biosynthesis of amino acids	hypothetical protein TRIUR3_03238 [Triticum urartu]	--	A0A446RFR4_TRITD RecName: Full=F-box domain-containing protein {ECO:0000259|Pfam:PF00646};	--	--	PF00646.33:F-box domain	--	--	--
TraesCS4A02G297800	TRUE	FALSE	FALSE	FALSE	186.69	162.76	150.67	166.707	389.29	415.51	277.45	360.75	310.05	303.28	261.72	291.683	472.12	353.37	403.34	409.61	4A	596825115	596827481	+	TraesCS4A02G297800	--	K00600 glycine hydroxymethyltransferase [EC:2.1.2.1] | (RefSeq) serine hydroxymethyltransferase 4-like (A)	ko00260: Glycine, serine and threonine metabolism; ko00460: Cyanoamino acid metabolism; ko00630: Glyoxylate and dicarboxylate metabolism; ko00670: One carbon pool by folate; ko01100: Metabolic pathways; ko01110: Biosynthesis of secondary metabolites; ko01200: Carbon metabolism; ko01230: Biosynthesis of amino acids; ko01240: Biosynthesis of cofactors	uncharacterized protein LOC109747833 [Aegilops tauschii subsp. tauschii]	--	A0A446RAQ7_TRITD RecName: Full=VOC domain-containing protein {ECO:0000259|PROSITE:PS51819};	At2g32090	--	PF00903.25:Glyoxalase/Bleomycin resistance protein/Dioxygenase superfamily	--	--	--
TraesCS4A02G234400	TRUE	FALSE	FALSE	FALSE	5.2	3.79	4.36	4.45	9.83	10.69	10.62	10.38	7.63	13.14	7.29	9.35333	17.51	9.87	10.6	12.66	4A	543365490	543369986	+	TraesCS4A02G234400	--	K00145 N-acetyl-gamma-glutamyl-phosphate reductase [EC:1.2.1.38] | (RefSeq) probable N-acetyl-gamma-glutamyl-phosphate reductase, chloroplastic (A)	ko00220: Arginine biosynthesis; ko01100: Metabolic pathways; ko01110: Biosynthesis of secondary metabolites; ko01210: 2-Oxocarboxylic acid metabolism; ko01230: Biosynthesis of amino acids	probable N-acetyl-gamma-glutamyl-phosphate reductase, chloroplastic [Aegilops tauschii subsp. tauschii]	ARGC_ORYSJ RecName: Full=Probable N-acetyl-gamma-glutamyl-phosphate reductase, chloroplastic; Short=AGPR; EC=1.2.1.38; AltName: Full=N-acetyl-glutamate semialdehyde dehydrogenase; Short=NAGSA dehydrogenase; Flags: Precursor;	A0A446R5W5_TRITD RecName: Full=N-acetyl-glutamate semialdehyde dehydrogenase {ECO:0000256|ARBA:ARBA00013792}; EC=1.2.1.38 {ECO:0000256|ARBA:ARBA00013072};	At2g19940	GO:0009507,chloroplast; GO:0003942,N-acetyl-gamma-glutamyl-phosphate reductase activity; GO:0051287,NAD binding; GO:0046983,protein dimerization activity; GO:0006526,arginine biosynthetic process; GO:0003674,molecular_function; GO:0003824,catalytic activity; GO:0016491,oxidoreductase activity; GO:0016620,oxidoreductase activity, acting on the aldehyde or oxo group of donors, NAD or NADP as accept…	PF01118.24:Semialdehyde dehydrogenase, NAD binding domain	--	--	--
TraesCS4A02G212400	TRUE	FALSE	FALSE	FALSE	0.42	0.86	0.66	0.646667	1.47	1.8	2.05	1.77333	1.04	1.43	0.75	1.07333	0.82	1.57	0.96	1.11667	4A	507965353	507971049	-	TraesCS4A02G212400	--	K01738 cysteine synthase [EC:2.5.1.47] | (RefSeq) cysteine synthase (A)	ko00270: Cysteine and methionine metabolism; ko00920: Sulfur metabolism; ko01100: Metabolic pathways; ko01110: Biosynthesis of secondary metabolites; ko01200: Carbon metabolism; ko01230: Biosynthesis of amino acids	putative F-box/LRR-repeat protein At3g28410 [Aegilops tauschii subsp. tauschii]	CYSK_WHEAT RecName: Full=Cysteine synthase; EC=2.5.1.47; AltName: Full=CSase A; AltName: Full=O-acetylserine (thiol)-lyase; Short=OAS-TL A; AltName: Full=O-acetylserine sulfhydrylase;	A0A3B6HWG2_WHEAT SubName: Full=Uncharacterized protein {ECO:0000313|EnsemblPlants:TraesCS4A02G212400.1};	At4g14880	GO:0005737,cytoplasm; GO:0004124,cysteine synthase activity; GO:0030170,pyridoxal phosphate binding; GO:0006535,cysteine biosynthetic process from serine; GO:0003674,molecular_function; GO:0003824,catalytic activity; GO:0016740,transferase activity; GO:0016765,transferase activity, transferring alkyl or aryl (other than methyl) groups; GO:0005488,binding; GO:0019842,vitamin binding; GO:0036094,sm…	--	--	--	--
TraesCS4A02G131900	TRUE	TRUE	TRUE	TRUE	31.76	36.14	39.2	35.7	12.87	13.02	28.23	18.04	20.46	9.2	17.14	15.6	2.22	1.42	1.47	1.70333	4A	176859270	176867614	+	TraesCS4A02G131900	--	K15633 2,3-bisphosphoglycerate-independent phosphoglycerate mutase [EC:5.4.2.12] | (RefSeq) 2,3-bisphosphoglycerate-independent phosphoglycerate mutase-like (A)	ko00010: Glycolysis / Gluconeogenesis; ko00260: Glycine, serine and threonine metabolism; ko01100: Metabolic pathways; ko01110: Biosynthesis of secondary metabolites; ko01200: Carbon metabolism; ko01230: Biosynthesis of amino acids	2,3-bisphosphoglycerate-independent phosphoglycerate mutase-like [Aegilops tauschii subsp. tauschii]	PMGI_RICCO RecName: Full=2,3-bisphosphoglycerate-independent phosphoglycerate mutase; Short=BPG-independent PGAM; Short=Phosphoglyceromutase; EC=5.4.2.12; AltName: Full=PGAM-I;	A0A3B6HR71_WHEAT RecName: Full=Phosphoglycerate mutase (2,3-diphosphoglycerate-independent) {ECO:0000256|ARBA:ARBA00012026}; EC=5.4.2.12 {ECO:0000256|ARBA:ARBA00012026};	At3g08590	GO:0005737,cytoplasm; GO:0030145,manganese ion binding; GO:0004619,phosphoglycerate mutase activity; GO:0006007,glucose catabolic process; GO:0006096,glycolytic process; GO:0003674,molecular_function; GO:0005488,binding; GO:0043167,ion binding; GO:0043169,cation binding; GO:0046872,metal ion binding; GO:0046914,transition metal ion binding; GO:0003824,catalytic activity; GO:0016853,isomerase acti…	PF01676.18:Metalloenzyme superfamily	--	--	--
TraesCS4A02G129600	TRUE	FALSE	FALSE	FALSE	5.57	5.15	5.96	5.56	1.92	2.45	2.19	2.18667	3.71	5.81	3.2	4.24	4.49	4.45	2.85	3.93	4A	169901129	169903353	+	TraesCS4A02G129600	--	K22846 S-sulfo-L-cysteine synthase (O-acetyl-L-serine-dependent) [EC:2.5.1.144] | (RefSeq) BSAS; uncharacterized protein BSAS (A)	ko00270: Cysteine and methionine metabolism; ko01100: Metabolic pathways; ko01230: Biosynthesis of amino acids	probable arabinosyltransferase ARAD1 [Aegilops tauschii subsp. tauschii]	ARAD1_ARATH RecName: Full=Probable arabinosyltransferase ARAD1; EC=2.4.2.-; AltName: Full=Arabinan alpha-1,5-arabinosyltransferase; AltName: Full=L-Arabinosyltransferase; AltName: Full=Protein ARABINAN DEFICIENT 1;	A0A3B6HR31_WHEAT RecName: Full=Exostosin domain-containing protein {ECO:0000259|Pfam:PF03016};	At3g45400	GO:0005768,endosome; GO:0005794,Golgi apparatus; GO:0000139,Golgi membrane; GO:0000138,Golgi trans cisterna; GO:0016021,integral component of membrane; GO:0005802,trans-Golgi network; GO:0016757,transferase activity, transferring glycosyl groups; GO:0071555,cell wall organization; GO:0045489,pectin biosynthetic process; GO:0006486,protein glycosylation; GO:0003674,molecular_function; GO:0003824,c…	PF03016.15:Exostosin family	--	--	--
TraesCS4A02G106500	TRUE	TRUE	FALSE	FALSE	0.53	0.24	0.66	0.476667	2.14	1.86	0.94	1.64667	0.7	0.86	0.96	0.84	1.76	2.3	1.92	1.99333	4A	121153040	121156903	+	TraesCS4A02G106500	Arogenate dehydratase [Source:UniProtKB/TrEMBL%3BAcc:W5DX68]	K05359 arogenate/prephenate dehydratase [EC:4.2.1.91 4.2.1.51] | (RefSeq) arogenate dehydratase/prephenate dehydratase 2, chloroplastic-like (A)	ko00400: Phenylalanine, tyrosine and tryptophan biosynthesis; ko01100: Metabolic pathways; ko01110: Biosynthesis of secondary metabolites; ko01230: Biosynthesis of amino acids	arogenate dehydratase/prephenate dehydratase 2, chloroplastic-like [Aegilops tauschii subsp. tauschii]	AROD2_PETHY RecName: Full=Arogenate dehydratase 2 {ECO:0000303|PubMed:20215586}; Short=PhADT2 {ECO:0000303|PubMed:20215586}; EC=4.2.1.91 {ECO:0000269|PubMed:20215586}; AltName: Full=Prephenate dehydratase ADT3 {ECO:0000305}; EC=4.2.1.51 {ECO:0000255|PROSITE-ProRule:PRU00517, ECO:0000269|PubMed:20215586}; Flags: Precursor;	A0A453IBR0_AEGTS RecName: Full=Arogenate dehydratase {ECO:0000256|ARBA:ARBA00013259, ECO:0000256|RuleBase:RU363004}; EC=4.2.1.91 {ECO:0000256|ARBA:ARBA00013259, ECO:0000256|RuleBase:RU363004};	At3g07630	GO:0009507,chloroplast; GO:0009570,chloroplast stroma; GO:0047769,arogenate dehydratase activity; GO:0004664,prephenate dehydratase activity; GO:0009094,L-phenylalanine biosynthetic process; GO:0003674,molecular_function; GO:0003824,catalytic activity; GO:0016829,lyase activity; GO:0016835,carbon-oxygen lyase activity; GO:0016836,hydro-lyase activity; GO:0006082,organic acid metabolic process; GO…	PF00800.18:Prephenate dehydratase	--	--	--
TraesCS4A02G091900	TRUE	FALSE	FALSE	FALSE	6.04	5.58	4.48	5.36667	12.19	12.77	9.65	11.5367	6.45	9.55	6.39	7.46333	12.68	11.3	10.13	11.37	4A	98600959	98605642	-	TraesCS4A02G091900	Cytosolic enolase 3 [Source:Projected from Arabidopsis thaliana (AT2G29560) UniProtKB/Swiss-Prot%3BAcc:Q9ZW34]	K01689 enolase [EC:4.2.1.11] | (RefSeq) cytosolic enolase 3-like (A)	ko00010: Glycolysis / Gluconeogenesis; ko01100: Metabolic pathways; ko01110: Biosynthesis of secondary metabolites; ko01200: Carbon metabolism; ko01230: Biosynthesis of amino acids; ko03018: RNA degradation	cytosolic enolase 3 isoform X2 [Aegilops tauschii subsp. tauschii]	ENO3_ARATH RecName: Full=Cytosolic enolase 3; EC=4.2.1.11; AltName: Full=2-phospho-D-glycerate hydro-lyase 3; AltName: Full=2-phosphoglycerate dehydratase 3;	A0A453IFA7_AEGTS RecName: Full=Phosphopyruvate hydratase {ECO:0000256|ARBA:ARBA00012058}; EC=4.2.1.11 {ECO:0000256|ARBA:ARBA00012058};	At2g29560	GO:0005737,cytoplasm; GO:0005829,cytosol; GO:0005634,nucleus; GO:0005777,peroxisome; GO:0000015,phosphopyruvate hydratase complex; GO:0000287,magnesium ion binding; GO:0004634,phosphopyruvate hydratase activity; GO:0006096,glycolytic process; GO:0032889,regulation of vacuole fusion, non-autophagic; GO:0003674,molecular_function; GO:0005488,binding; GO:0043167,ion binding; GO:0043169,cation bindin…	PF00113.22:Enolase, C-terminal TIM barrel domain	--	--	--
TraesCS4A02G063800	TRUE	FALSE	FALSE	FALSE	0.19	0.87	0.41	0.49	2.23	1.65	1.05	1.64333	0.73	0.88	0.74	0.783333	0.81	0.18	0.77	0.586667	4A	60668121	60671232	+	TraesCS4A02G063800	Glutamine synthetase [Source:UniProtKB/TrEMBL%3BAcc:A0A0C4BJG7]	K01915 glutamine synthetase [EC:6.3.1.2] | (RefSeq) glutamine synthetase cytosolic isozyme 1-2-like (A)	ko00220: Arginine biosynthesis; ko00250: Alanine, aspartate and glutamate metabolism; ko00630: Glyoxylate and dicarboxylate metabolism; ko00910: Nitrogen metabolism; ko01100: Metabolic pathways; ko01230: Biosynthesis of amino acids	glutamine synthetase cytosolic isozyme 1-2 [Aegilops tauschii subsp. tauschii]	GLN12_ORYSJ RecName: Full=Glutamine synthetase cytosolic isozyme 1-2 {ECO:0000305}; EC=6.3.1.2 {ECO:0000269|PubMed:15574840}; AltName: Full=Glutamate--ammonia ligase GLN1;2 {ECO:0000305}; Short=OsGLN1;2 {ECO:0000303|PubMed:15574840}; AltName: Full=Glutamine synthetase root isozyme {ECO:0000305}; AltName: Full=OsGS1;2 {ECO:0000312|EMBL:BAD77931.1};	A0A446QNV7_TRITD RecName: Full=Glutamine synthetase {ECO:0000256|ARBA:ARBA00012937, ECO:0000256|RuleBase:RU004356}; EC=6.3.1.2 {ECO:0000256|ARBA:ARBA00012937, ECO:0000256|RuleBase:RU004356};	At5g37600	GO:0005737,cytoplasm; GO:0005524,ATP binding; GO:0004356,glutamate-ammonia ligase activity; GO:0006542,glutamine biosynthetic process; GO:0000166,nucleotide binding; GO:0003674,molecular_function; GO:0005488,binding; GO:0017076,purine nucleotide binding; GO:0030554,adenyl nucleotide binding; GO:0032553,ribonucleotide binding; GO:0032555,purine ribonucleotide binding; GO:0032559,adenyl ribonucleot…	PF00120.24:Glutamine synthetase, catalytic domain	--	--	--
TraesCS4A02G059800	TRUE	FALSE	TRUE	FALSE	1.38	1.89	1.22	1.49667	0.73	0.38	0.86	0.656667	0.02	0.27	0.51	0.266667	1.39	0.27	0.3	0.653333	4A	56260273	56262853	+	TraesCS4A02G059800	Branched-chain-amino-acid aminotransferase [Source:UniProtKB/TrEMBL%3BAcc:W5DXU1]	K00826 branched-chain amino acid aminotransferase [EC:2.6.1.42] | (RefSeq) branched-chain-amino-acid aminotransferase 2, chloroplastic-like (A)	ko00270: Cysteine and methionine metabolism; ko00280: Valine, leucine and isoleucine degradation; ko00290: Valine, leucine and isoleucine biosynthesis; ko00770: Pantothenate and CoA biosynthesis; ko00966: Glucosinolate biosynthesis; ko01100: Metabolic pathways; ko01110: Biosynthesis of secondary metabolites; ko01210: 2-Oxocarboxylic acid metabolism; ko01230: Biosynthesis of amino acids; ko01240: …	Branched-chain-amino-acid aminotransferase 3, chloroplastic [Triticum urartu]	BCAT3_ARATH RecName: Full=Branched-chain-amino-acid aminotransferase 3, chloroplastic {ECO:0000303|PubMed:12068099}; Short=Atbcat-3; EC=2.6.1.42; EC=2.6.1.88; Flags: Precursor;	A0A446QP86_TRITD RecName: Full=Branched-chain-amino-acid aminotransferase {ECO:0000256|RuleBase:RU004517}; EC=2.6.1.42 {ECO:0000256|RuleBase:RU004517};	At3g49680	GO:0009507,chloroplast; GO:0009570,chloroplast stroma; GO:0004084,branched-chain-amino-acid transaminase activity; GO:0052656,L-isoleucine transaminase activity; GO:0052654,L-leucine transaminase activity; GO:0050048,L-leucine:2-oxoglutarate aminotransferase activity; GO:0052655,L-valine transaminase activity; GO:0009097,isoleucine biosynthetic process; GO:0009098,leucine biosynthetic process; GO…	PF01063.19:Amino-transferase class IV	--	--	--
TraesCS4A02G045100	TRUE	TRUE	FALSE	FALSE	7.39	5.8	5.12	6.10333	31.36	30.01	25.72	29.03	11.89	10.47	9.8	10.72	28.68	21.63	26.47	25.5933	4A	37299946	37302159	+	TraesCS4A02G045100	--	K00873 pyruvate kinase [EC:2.7.1.40] | (RefSeq) uncharacterized protein LOC118033103 isoform X1 (A)	ko00010: Glycolysis / Gluconeogenesis; ko00620: Pyruvate metabolism; ko01100: Metabolic pathways; ko01110: Biosynthesis of secondary metabolites; ko01200: Carbon metabolism; ko01230: Biosynthesis of amino acids	uncharacterized protein LOC109762295 [Aegilops tauschii subsp. tauschii]	--	A0A446QMF2_TRITD SubName: Full=Uncharacterized protein {ECO:0000313|EMBL:VAH87856.1};	At5g54540	GO:0016021,integral component of membrane; GO:0005575,cellular_component; GO:0016020,membrane; GO:0031224,intrinsic component of membrane; GO:0110165,cellular anatomical entity	PF05335.13:Protein of unknown function (DUF745)	--	--	--
TraesCS4A02G021700	TRUE	FALSE	FALSE	FALSE	0.52	1.18	1.35	1.01667	1.36	3.08	4.21	2.88333	0.73	0	0.59	0.44	0.18	0.51	2.2	0.963333	4A	15647447	15650784	+	TraesCS4A02G021700	--	K14152 phosphoribosyl-ATP pyrophosphohydrolase / phosphoribosyl-AMP cyclohydrolase / histidinol dehydrogenase [EC:3.6.1.31 3.5.4.19 1.1.1.23] | (RefSeq) uncharacterized protein LOC111783531 (A)	ko00340: Histidine metabolism; ko01100: Metabolic pathways; ko01110: Biosynthesis of secondary metabolites; ko01230: Biosynthesis of amino acids	protein SULFUR DEFICIENCY-INDUCED 2-like [Aegilops tauschii subsp. tauschii]	SDI2_ARATH RecName: Full=Protein SULFUR DEFICIENCY-INDUCED 2 {ECO:0000305};	A0A446QLN1_TRITD SubName: Full=Uncharacterized protein {ECO:0000313|EMBL:VAH87310.1};	At1g04770	GO:0005634,nucleus; GO:0010438,cellular response to sulfur starvation; GO:0009658,chloroplast organization; GO:0010439,regulation of glucosinolate biosynthetic process; GO:0006950,response to stress; GO:0007154,cell communication; GO:0008150,biological_process; GO:0009267,cellular response to starvation; GO:0009605,response to external stimulus; GO:0009987,cellular process; GO:0009991,response to…	PF00515.28:Tetratricopeptide repeat	--	--	--
TraesCS4A02G021200	TRUE	FALSE	FALSE	FALSE	0.06	0.07	0.24	0.123333	0.79	0.51	1.63	0.976667	0.2	0.73	0.67	0.533333	0.46	0.59	0.5	0.516667	4A	14353713	14358911	-	TraesCS4A02G021200	--	K01681 aconitate hydratase [EC:4.2.1.3] | (RefSeq) putative aconitate hydratase, cytoplasmic (A)	ko00020: Citrate cycle (TCA cycle); ko00630: Glyoxylate and dicarboxylate metabolism; ko01100: Metabolic pathways; ko01110: Biosynthesis of secondary metabolites; ko01200: Carbon metabolism; ko01210: 2-Oxocarboxylic acid metabolism; ko01230: Biosynthesis of amino acids	uncharacterized protein LOC109746885 [Aegilops tauschii subsp. tauschii]	--	A0A446QKU7_TRITD RecName: Full=F-box domain-containing protein {ECO:0000259|Pfam:PF00646};	--	--	PF00646.33:F-box domain	--	--	--
TraesCS4A02G019100	TRUE	FALSE	FALSE	FALSE	5.81	6.12	4.46	5.46333	13.46	12.8	17.02	14.4267	4.62	5.88	6.29	5.59667	13.18	6.63	12.03	10.6133	4A	12395602	12399697	+	TraesCS4A02G019100	Ribulose-phosphate 3-epimerase [Source:UniProtKB/TrEMBL%3BAcc:W5E5Z3]	K01783 ribulose-phosphate 3-epimerase [EC:5.1.3.1] | (RefSeq) ribulose-phosphate 3-epimerase, chloroplastic (A)	ko00030: Pentose phosphate pathway; ko00040: Pentose and glucuronate interconversions; ko00710: Carbon fixation in photosynthetic organisms; ko01100: Metabolic pathways; ko01110: Biosynthesis of secondary metabolites; ko01200: Carbon metabolism; ko01230: Biosynthesis of amino acids	ribulose-phosphate 3-epimerase, chloroplastic [Aegilops tauschii subsp. tauschii]	RPE_ORYSJ RecName: Full=Ribulose-phosphate 3-epimerase, chloroplastic; EC=5.1.3.1 {ECO:0000250|UniProtKB:Q43157}; AltName: Full=Pentose-5-phosphate 3-epimerase; Short=PPE; AltName: Full=R5P3E; Short=RPE; Flags: Precursor;	W5E5Z3_WHEAT RecName: Full=Ribulose-phosphate 3-epimerase {ECO:0000256|PIRNR:PIRNR001461}; EC=5.1.3.1 {ECO:0000256|PIRNR:PIRNR001461};	At5g61410	GO:0009535,chloroplast thylakoid membrane; GO:0005829,cytosol; GO:0046872,metal ion binding; GO:0004750,ribulose-phosphate 3-epimerase activity; GO:0044262,cellular carbohydrate metabolic process; GO:0019323,pentose catabolic process; GO:0009052,pentose-phosphate shunt, non-oxidative branch; GO:0019253,reductive pentose-phosphate cycle; GO:0003674,molecular_function; GO:0005488,binding; GO:004316…	PF00834.19:Ribulose-phosphate 3 epimerase family	--	--	--
TraesCS3D02G418400	TRUE	TRUE	FALSE	FALSE	3.85	4.43	4.42	4.23333	1.86	2.02	2.3	2.06	7.91	2.5	4.81	5.07333	1.45	1.68	1.85	1.66	3D	531051694	531057112	-	TraesCS3D02G418400	--	K13832 3-dehydroquinate dehydratase / shikimate dehydrogenase [EC:4.2.1.10 1.1.1.25] | (RefSeq) bifunctional 3-dehydroquinate dehydratase/shikimate dehydrogenase, chloroplastic-like isoform X1 (A)	ko00400: Phenylalanine, tyrosine and tryptophan biosynthesis; ko00999: Biosynthesis of various plant secondary metabolites; ko01100: Metabolic pathways; ko01110: Biosynthesis of secondary metabolites; ko01230: Biosynthesis of amino acids	zinc finger CCCH domain-containing protein 12-like [Aegilops tauschii subsp. tauschii]	C3H12_ORYSJ RecName: Full=Zinc finger CCCH domain-containing protein 12; Short=OsC3H12; AltName: Full=Zinc finger CCCH domain-containing protein ZFN-like 2;	A0A3B6H0E5_WHEAT SubName: Full=Uncharacterized protein {ECO:0000313|EnsemblPlants:TraesCS3D02G418400.4};	At3g02830	GO:0005634,nucleus; GO:0003677,DNA binding; GO:0046872,metal ion binding; GO:0003729,mRNA binding; GO:0003674,molecular_function; GO:0003676,nucleic acid binding; GO:0005488,binding; GO:0097159,organic cyclic compound binding; GO:1901363,heterocyclic compound binding; GO:0043167,ion binding; GO:0043169,cation binding; GO:0003723,RNA binding; GO:0005575,cellular_component; GO:0005622,intracellular…	PF00642.24:Zinc finger C-x8-C-x5-C-x3-H type (and similar)	C3H	TF	C3H
TraesCS3D02G383700	TRUE	TRUE	FALSE	FALSE	17.85	17.86	22.9	19.5367	3.8	7.39	1.76	4.31667	18.35	96.13	37.91	50.7967	4.07	6.05	12.42	7.51333	3D	499039459	499042058	+	TraesCS3D02G383700	Fructose-bisphosphate aldolase [Source:UniProtKB/TrEMBL%3BAcc:A0A1D5WIS4]	K01623 fructose-bisphosphate aldolase, class I [EC:4.1.2.13] | (RefSeq) fructose-bisphosphate aldolase 1, cytoplasmic-like (A)	ko00010: Glycolysis / Gluconeogenesis; ko00030: Pentose phosphate pathway; ko00051: Fructose and mannose metabolism; ko00710: Carbon fixation in photosynthetic organisms; ko01100: Metabolic pathways; ko01110: Biosynthesis of secondary metabolites; ko01200: Carbon metabolism; ko01230: Biosynthesis of amino acids	fructose-bisphosphate aldolase 1, cytoplasmic-like [Aegilops tauschii subsp. tauschii]	ALFC1_ORYSJ RecName: Full=Fructose-bisphosphate aldolase 1, cytoplasmic {ECO:0000305}; EC=4.1.2.13 {ECO:0000250|UniProtKB:Q9SJQ9}; AltName: Full=Cytoplasmic aldolase {ECO:0000303|PubMed:2374721}; Short=cALD {ECO:0000303|PubMed:2374721}; AltName: Full=Gravity-specific protein GSC 233 {ECO:0000303|PubMed:1363521};	A0A453G386_AEGTS RecName: Full=Fructose-bisphosphate aldolase {ECO:0000256|ARBA:ARBA00013068, ECO:0000256|RuleBase:RU003994}; EC=4.1.2.13 {ECO:0000256|ARBA:ARBA00013068, ECO:0000256|RuleBase:RU003994};	At2g36460	GO:0005737,cytoplasm; GO:0005829,cytosol; GO:0004332,fructose-bisphosphate aldolase activity; GO:0030388,fructose 1,6-bisphosphate metabolic process; GO:0006094,gluconeogenesis; GO:0006096,glycolytic process; GO:0048364,root development; GO:0003674,molecular_function; GO:0003824,catalytic activity; GO:0016829,lyase activity; GO:0016830,carbon-carbon lyase activity; GO:0016832,aldehyde-lyase activ…	PF00274.19:Fructose-bisphosphate aldolase class-I	--	--	--
TraesCS3D02G378700	TRUE	FALSE	FALSE	FALSE	2.88	2.66	3.13	2.89	4.45	5.2	8.88	6.17667	1.84	4.23	2.87	2.98	4.55	5.49	3.47	4.50333	3D	495915950	495920036	+	TraesCS3D02G378700	--	K00600 glycine hydroxymethyltransferase [EC:2.1.2.1] | (RefSeq) serine hydroxymethyltransferase 7-like (A)	ko00260: Glycine, serine and threonine metabolism; ko00460: Cyanoamino acid metabolism; ko00630: Glyoxylate and dicarboxylate metabolism; ko00670: One carbon pool by folate; ko01100: Metabolic pathways; ko01110: Biosynthesis of secondary metabolites; ko01200: Carbon metabolism; ko01230: Biosynthesis of amino acids; ko01240: Biosynthesis of cofactors	serine hydroxymethyltransferase 7-like [Aegilops tauschii subsp. tauschii]	GLYC7_ARATH RecName: Full=Serine hydroxymethyltransferase 7; Short=AtSHMT7; EC=2.1.2.1; AltName: Full=Glycine hydroxymethyltransferase 7; AltName: Full=Serine methylase 7;	A0A3B6GYY7_WHEAT RecName: Full=Glycine hydroxymethyltransferase {ECO:0000256|ARBA:ARBA00012256}; EC=2.1.2.1 {ECO:0000256|ARBA:ARBA00012256};	At1g36370	GO:0005737,cytoplasm; GO:0005634,nucleus; GO:0050897,cobalt ion binding; GO:0004372,glycine hydroxymethyltransferase activity; GO:0030170,pyridoxal phosphate binding; GO:0070905,serine binding; GO:0008270,zinc ion binding; GO:0046655,folic acid metabolic process; GO:0019264,glycine biosynthetic process from serine; GO:0006565,L-serine catabolic process; GO:0006730,one-carbon metabolic process; GO…	PF00464.19:Serine hydroxymethyltransferase	--	--	--
TraesCS3D02G353600	TRUE	FALSE	FALSE	FALSE	2.33	2.28	2.03	2.21333	0.53	0.64	1.51	0.893333	1.48	2.54	2.11	2.04333	0.92	1.09	0.78	0.93	3D	464309973	464311891	+	TraesCS3D02G353600	--	K01803 triosephosphate isomerase (TIM) [EC:5.3.1.1] | (RefSeq) triosephosphate isomerase, cytosolic (A)	ko00010: Glycolysis / Gluconeogenesis; ko00051: Fructose and mannose metabolism; ko00562: Inositol phosphate metabolism; ko00710: Carbon fixation in photosynthetic organisms; ko01100: Metabolic pathways; ko01110: Biosynthesis of secondary metabolites; ko01200: Carbon metabolism; ko01230: Biosynthesis of amino acids	elicitor-responsive protein 1-like [Aegilops tauschii subsp. tauschii]	ERG1_ORYSI RecName: Full=Elicitor-responsive protein 1; AltName: Full=17 kDa phloem protein; AltName: Full=Fungal elicitor immediate early-responsive gene 1 protein; Short=FIERG1; AltName: Full=Rpp17;	A0A453FWU3_AEGTS RecName: Full=C2 domain-containing protein {ECO:0000259|PROSITE:PS50004};	At3g55470	GO:0005737,cytoplasm; GO:0005886,plasma membrane; GO:0005544,calcium-dependent phospholipid binding; GO:0046872,metal ion binding; GO:0003674,molecular_function; GO:0005488,binding; GO:0005543,phospholipid binding; GO:0008289,lipid binding; GO:0043167,ion binding; GO:0043169,cation binding; GO:0005575,cellular_component; GO:0005622,intracellular anatomical structure; GO:0110165,cellular anatomica…	PF00168.30:C2 domain	--	--	--
TraesCS3D02G331500	TRUE	TRUE	FALSE	FALSE	9.65	8.85	8.8	9.1	3.66	3.9	0.95	2.83667	13.89	13.13	10.64	12.5533	3.92	6.26	3.88	4.68667	3D	443670426	443676798	-	TraesCS3D02G331500	--	K01689 enolase [EC:4.2.1.11] | (RefSeq) cytosolic enolase 3-like isoform X1 (A)	ko00010: Glycolysis / Gluconeogenesis; ko01100: Metabolic pathways; ko01110: Biosynthesis of secondary metabolites; ko01200: Carbon metabolism; ko01230: Biosynthesis of amino acids; ko03018: RNA degradation	cytosolic enolase 3 isoform X2 [Aegilops tauschii subsp. tauschii]	ENO3_ARATH RecName: Full=Cytosolic enolase 3; EC=4.2.1.11; AltName: Full=2-phospho-D-glycerate hydro-lyase 3; AltName: Full=2-phosphoglycerate dehydratase 3;	A0A453FS46_AEGTS RecName: Full=Phosphopyruvate hydratase {ECO:0000256|ARBA:ARBA00012058}; EC=4.2.1.11 {ECO:0000256|ARBA:ARBA00012058};	At2g29560	GO:0005737,cytoplasm; GO:0005829,cytosol; GO:0005634,nucleus; GO:0005777,peroxisome; GO:0000015,phosphopyruvate hydratase complex; GO:0000287,magnesium ion binding; GO:0004634,phosphopyruvate hydratase activity; GO:0006096,glycolytic process; GO:0032889,regulation of vacuole fusion, non-autophagic; GO:0003674,molecular_function; GO:0005488,binding; GO:0043167,ion binding; GO:0043169,cation bindin…	PF00113.22:Enolase, C-terminal TIM barrel domain	--	--	--
TraesCS3D02G286900	TRUE	TRUE	FALSE	TRUE	2.59	2.19	3.33	2.70333	9.82	12.2	13.12	11.7133	5.99	7.9	4.7	6.19667	28.02	32.32	20.15	26.83	3D	395666416	395667327	-	TraesCS3D02G286900	--	K00640 serine O-acetyltransferase [EC:2.3.1.30] | (RefSeq) probable serine acetyltransferase 1 (A)	ko00270: Cysteine and methionine metabolism; ko00920: Sulfur metabolism; ko01100: Metabolic pathways; ko01110: Biosynthesis of secondary metabolites; ko01200: Carbon metabolism; ko01230: Biosynthesis of amino acids	probable serine acetyltransferase 1 [Aegilops tauschii subsp. tauschii]	SAT1_ORYSJ RecName: Full=Probable serine acetyltransferase 1; EC=2.3.1.30; AltName: Full=OsSERAT1;1;	A0A3B6GZ77_WHEAT RecName: Full=Serine O-acetyltransferase {ECO:0000256|ARBA:ARBA00013266}; EC=2.3.1.30 {ECO:0000256|ARBA:ARBA00013266};	At5g56760	GO:0005829,cytosol; GO:0009001,serine O-acetyltransferase activity; GO:0006535,cysteine biosynthetic process from serine; GO:0003674,molecular_function; GO:0003824,catalytic activity; GO:0008374,O-acyltransferase activity; GO:0016407,acetyltransferase activity; GO:0016412,serine O-acyltransferase activity; GO:0016413,O-acetyltransferase activity; GO:0016740,transferase activity; GO:0016746,transf…	PF06426.14:Serine acetyltransferase, N-terminal	--	--	--
TraesCS3D02G266400	TRUE	FALSE	FALSE	FALSE	0.4	0.47	0.61	0.493333	1.56	1.34	2.11	1.67	0.37	3.36	0.82	1.51667	2.61	2.38	1.98	2.32333	3D	369790549	369802074	+	TraesCS3D02G266400	--	K00264 glutamate synthase (NADH) [EC:1.4.1.14] | (RefSeq) glutamate synthase 1 [NADH], chloroplastic (A)	ko00250: Alanine, aspartate and glutamate metabolism; ko00910: Nitrogen metabolism; ko01100: Metabolic pathways; ko01110: Biosynthesis of secondary metabolites; ko01230: Biosynthesis of amino acids	glutamate synthase 1 [NADH]	GLT1_ORYSJ RecName: Full=Glutamate synthase 1 [NADH], chloroplastic; EC=1.4.1.14; AltName: Full=NADH-dependent glutamate synthase 1; Short=NADH-GOGAT 1; Flags: Precursor;	A0A453FCY0_AEGTS RecName: Full=Glutamine amidotransferase type-2 domain-containing protein {ECO:0000259|PROSITE:PS51278};	At5g53460	GO:0009507,chloroplast; GO:0009536,plastid; GO:0051538,3 iron, 4 sulfur cluster binding; GO:0050660,flavin adenine dinucleotide binding; GO:0010181,FMN binding; GO:0016040,glutamate synthase (NADH) activity; GO:0015930,glutamate synthase activity; GO:0005506,iron ion binding; GO:0016491,oxidoreductase activity; GO:0019676,ammonia assimilation cycle; GO:0048589,developmental growth; GO:0006537,glu…	PF00310.21:Glutamine amidotransferases class-II	--	--	--
TraesCS3D02G189400	TRUE	FALSE	FALSE	FALSE	5.23	4.66	5.42	5.10333	8.22	9.67	14.23	10.7067	4.36	5.11	4.92	4.79667	7.34	9.91	7.79	8.34667	3D	177057103	177062230	-	TraesCS3D02G189400	Hydroxymethylglutaryl-CoA lyase%2C mitochondrial [Source:Projected from Arabidopsis thaliana (AT2G26800) UniProtKB/Swiss-Prot%3BAcc:O81027]	K01640 hydroxymethylglutaryl-CoA lyase [EC:4.1.3.4] | (RefSeq) hydroxymethylglutaryl-CoA lyase, mitochondrial-like isoform X1 (A)	ko00280: Valine, leucine and isoleucine degradation; ko00650: Butanoate metabolism; ko01100: Metabolic pathways; ko01110: Biosynthesis of secondary metabolites; ko04146: Peroxisome	hydroxymethylglutaryl-CoA lyase, mitochondrial-like isoform X1 [Aegilops tauschii subsp. tauschii]	HMGCL_ARATH RecName: Full=Hydroxymethylglutaryl-CoA lyase, mitochondrial; Short=HL; Short=HMG-CoA lyase; EC=4.1.3.4; AltName: Full=3-hydroxy-3-methylglutarate-CoA lyase;	A0A3B6GUQ0_WHEAT RecName: Full=3-hydroxy-3-methylglutarate-CoA lyase {ECO:0000256|ARBA:ARBA00019846}; EC=4.1.3.4 {ECO:0000256|ARBA:ARBA00012910}; AltName: Full=Hydroxymethylglutaryl-CoA lyase, mitochondrial {ECO:0000256|ARBA:ARBA00014045};	At2g26800	GO:0005759,mitochondrial matrix; GO:0005739,mitochondrion; GO:0004419,hydroxymethylglutaryl-CoA lyase activity; GO:0046872,metal ion binding; GO:0046951,ketone body biosynthetic process; GO:0006552,leucine catabolic process; GO:0006629,lipid metabolic process; GO:0003674,molecular_function; GO:0003824,catalytic activity; GO:0016829,lyase activity; GO:0016830,carbon-carbon lyase activity; GO:00168…	PF00682.19:HMGL-like	--	--	--
TraesCS3D02G175100	TRUE	FALSE	FALSE	FALSE	4.36	3.59	2.83	3.59333	8.38	8.2	11.19	9.25667	4.76	5.28	3.53	4.52333	10.93	7.91	7.31	8.71667	3D	157096719	157102316	+	TraesCS3D02G175100	Isocitrate dehydrogenase [NADP] [Source:UniProtKB/TrEMBL%3BAcc:A0A1D5WS24]	K00031 isocitrate dehydrogenase [EC:1.1.1.42] | (RefSeq) isocitrate dehydrogenase [NADP]-like (A)	ko00020: Citrate cycle (TCA cycle); ko00480: Glutathione metabolism; ko01100: Metabolic pathways; ko01110: Biosynthesis of secondary metabolites; ko01200: Carbon metabolism; ko01210: 2-Oxocarboxylic acid metabolism; ko01230: Biosynthesis of amino acids; ko04146: Peroxisome	isocitrate dehydrogenase [NADP]	IDHC_TOBAC RecName: Full=Isocitrate dehydrogenase [NADP]; Short=IDH; EC=1.1.1.42; AltName: Full=IDP; AltName: Full=NADP(+)-specific ICDH; AltName: Full=Oxalosuccinate decarboxylase;	A0A453ELC6_AEGTS RecName: Full=Isocitrate dehydrogenase [NADP] {ECO:0000256|PIRNR:PIRNR000108}; EC=1.1.1.42 {ECO:0000256|PIRNR:PIRNR000108};	At1g65930	GO:0005739,mitochondrion; GO:0004450,isocitrate dehydrogenase (NADP+) activity; GO:0000287,magnesium ion binding; GO:0051287,NAD binding; GO:0006097,glyoxylate cycle; GO:0006102,isocitrate metabolic process; GO:0006739,NADP metabolic process; GO:0006099,tricarboxylic acid cycle; GO:0003674,molecular_function; GO:0003824,catalytic activity; GO:0004448,isocitrate dehydrogenase activity; GO:0016491,…	PF00180.20:Isocitrate/isopropylmalate dehydrogenase	--	--	--
TraesCS3D02G083400	TRUE	TRUE	FALSE	FALSE	2.51	1.6	1.6	1.90333	0.69	0.57	1.02	0.76	1.35	1.56	1.23	1.38	0.06	0.68	0.36	0.366667	3D	42368832	42371333	+	TraesCS3D02G083400	Probable inactive shikimate kinase like 1%2C chloroplastic [Source:Projected from Arabidopsis thaliana (AT3G26900) UniProtKB/Swiss-Prot%3BAcc:Q9LW20]	K00891 shikimate kinase [EC:2.7.1.71] | (RefSeq) shikimate kinase, chloroplastic (A)	ko00400: Phenylalanine, tyrosine and tryptophan biosynthesis; ko01100: Metabolic pathways; ko01110: Biosynthesis of secondary metabolites; ko01230: Biosynthesis of amino acids	shikimate kinase family protein [Triticum monococcum]	SKL1_ARATH RecName: Full=Probable inactive shikimate kinase like 1, chloroplastic; Short=AtSKL1; Flags: Precursor;	T1SAM4_TRIMO SubName: Full=Shikimate kinase family protein {ECO:0000313|EMBL:AGR45903.1};	At3g26900	GO:0009507,chloroplast; GO:0009570,chloroplast stroma; GO:0005829,cytosol; GO:0009658,chloroplast organization; GO:0016310,phosphorylation; GO:0010027,thylakoid membrane organization; GO:0006996,organelle organization; GO:0008150,biological_process; GO:0009657,plastid organization; GO:0009987,cellular process; GO:0016043,cellular component organization; GO:0071840,cellular component organization …	PF01202.22:Shikimate kinase	--	--	--
TraesCS3D02G077300	TRUE	TRUE	FALSE	FALSE	163.46	147.48	146.06	152.333	37.22	42.39	78.41	52.6733	137.24	116.1	129.43	127.59	34.61	48.23	58.61	47.15	3D	37774235	37785576	+	TraesCS3D02G077300	--	K01953 asparagine synthase (glutamine-hydrolysing) [EC:6.3.5.4] | (RefSeq) asparagine synthetase [glutamine-hydrolyzing]-like (A)	ko00250: Alanine, aspartate and glutamate metabolism; ko01100: Metabolic pathways; ko01110: Biosynthesis of secondary metabolites; ko01230: Biosynthesis of amino acids	asparagine synthetase [glutamine-hydrolyzing]	ASNS_ASPOF RecName: Full=Asparagine synthetase [glutamine-hydrolyzing]; Short=AS; EC=6.3.5.4;	A0A453DZU4_AEGTS RecName: Full=Asparagine synthetase [glutamine-hydrolyzing] {ECO:0000256|PIRNR:PIRNR001589}; EC=6.3.5.4 {ECO:0000256|PIRNR:PIRNR001589};	At3g47340	GO:0004066,asparagine synthase (glutamine-hydrolyzing) activity; GO:0005524,ATP binding; GO:0006541,glutamine metabolic process; GO:0070981,L-asparagine biosynthetic process; GO:0003674,molecular_function; GO:0003824,catalytic activity; GO:0016874,ligase activity; GO:0016879,ligase activity, forming carbon-nitrogen bonds; GO:0016884,carbon-nitrogen ligase activity, with glutamine as amido-N-donor…	PF00733.21:Asparagine synthase	--	--	--
TraesCS3D02G005500	TRUE	FALSE	FALSE	FALSE	15.81	22.17	20.67	19.55	47.4	40.9	44.96	44.42	43.72	35.2	42.95	40.6233	66.59	66.07	47.94	60.2	3D	2147110	2150436	-	TraesCS3D02G005500	--	K00626 acetyl-CoA C-acetyltransferase [EC:2.3.1.9] | (RefSeq) acetyl-CoA acetyltransferase, cytosolic 1-like (A)	ko00071: Fatty acid degradation; ko00280: Valine, leucine and isoleucine degradation; ko00310: Lysine degradation; ko00380: Tryptophan metabolism; ko00620: Pyruvate metabolism; ko00630: Glyoxylate and dicarboxylate metabolism; ko00650: Butanoate metabolism; ko00900: Terpenoid backbone biosynthesis; ko01100: Metabolic pathways; ko01110: Biosynthesis of secondary metabolites; ko01200: Carbon metabo…	acetyl-CoA acetyltransferase, cytosolic 1-like [Aegilops tauschii subsp. tauschii]	THIC2_ARATH RecName: Full=Probable acetyl-CoA acetyltransferase, cytosolic 2; EC=2.3.1.9; AltName: Full=Cytosolic acetoacetyl-CoA thiolase 2; Short=Thiolase 2;	A0A3B6GKI0_WHEAT SubName: Full=Uncharacterized protein {ECO:0000313|EnsemblPlants:TraesCS3D02G005500.1};	At5g47720	GO:0005737,cytoplasm; GO:0003985,acetyl-CoA C-acetyltransferase activity; GO:0046872,metal ion binding; GO:0006635,fatty acid beta-oxidation; GO:0003674,molecular_function; GO:0003824,catalytic activity; GO:0003988,acetyl-CoA C-acyltransferase activity; GO:0016407,acetyltransferase activity; GO:0016408,C-acyltransferase activity; GO:0016453,C-acetyltransferase activity; GO:0016740,transferase act…	PF00108.23:Thiolase, N-terminal domain	--	--	--
TraesCS3B02G538100	TRUE	FALSE	FALSE	FALSE	11.84	9.21	8.64	9.89667	27.04	24.46	24.08	25.1933	18.55	18.6	17.51	18.22	25.37	28.16	21.64	25.0567	3B	777989721	777992508	+	TraesCS3B02G538100	Pyrroline-5-carboxylate reductase [Source:UniProtKB/TrEMBL%3BAcc:Q5EI64]	K00286 pyrroline-5-carboxylate reductase [EC:1.5.1.2] | (RefSeq) pyrroline-5-carboxylate reductase (A)	ko00330: Arginine and proline metabolism; ko01100: Metabolic pathways; ko01110: Biosynthesis of secondary metabolites; ko01230: Biosynthesis of amino acids	pyrroline-5-carboxylate reductase [Triticum aestivum]	P5CR_SOYBN RecName: Full=Pyrroline-5-carboxylate reductase; Short=P5C reductase; Short=P5CR; EC=1.5.1.2;	Q5EI64_WHEAT RecName: Full=Pyrroline-5-carboxylate reductase {ECO:0000256|RuleBase:RU003903}; EC=1.5.1.2 {ECO:0000256|RuleBase:RU003903};	At5g14800	GO:0005737,cytoplasm; GO:0004735,pyrroline-5-carboxylate reductase activity; GO:0055129,L-proline biosynthetic process; GO:0003674,molecular_function; GO:0003824,catalytic activity; GO:0016491,oxidoreductase activity; GO:0016645,oxidoreductase activity, acting on the CH-NH group of donors; GO:0016646,oxidoreductase activity, acting on the CH-NH group of donors, NAD or NADP as acceptor; GO:0006082…	PF14748.6:Pyrroline-5-carboxylate reductase dimerisation	--	--	--
TraesCS3B02G458800	TRUE	TRUE	FALSE	FALSE	4.66	4.98	6.53	5.39	1.56	2.2	2.51	2.09	6.37	2.38	5	4.58333	2.44	1.5	2	1.98	3B	701413811	701419196	-	TraesCS3B02G458800	Zinc finger protein [Source:UniProtKB/TrEMBL%3BAcc:D7NXU0]	K13832 3-dehydroquinate dehydratase / shikimate dehydrogenase [EC:4.2.1.10 1.1.1.25] | (RefSeq) bifunctional 3-dehydroquinate dehydratase/shikimate dehydrogenase, chloroplastic-like isoform X1 (A)	ko00400: Phenylalanine, tyrosine and tryptophan biosynthesis; ko00999: Biosynthesis of various plant secondary metabolites; ko01100: Metabolic pathways; ko01110: Biosynthesis of secondary metabolites; ko01230: Biosynthesis of amino acids	Zinc finger protein [Triticum aestivum]	C3H12_ORYSJ RecName: Full=Zinc finger CCCH domain-containing protein 12; Short=OsC3H12; AltName: Full=Zinc finger CCCH domain-containing protein ZFN-like 2;	D7NXU0_WHEAT SubName: Full=Zinc finger protein {ECO:0000313|EMBL:ACU21592.1, ECO:0000313|EnsemblPlants:TraesCS3B02G458800.4};	At3g02830	GO:0005634,nucleus; GO:0003677,DNA binding; GO:0046872,metal ion binding; GO:0003729,mRNA binding; GO:0003674,molecular_function; GO:0003676,nucleic acid binding; GO:0005488,binding; GO:0097159,organic cyclic compound binding; GO:1901363,heterocyclic compound binding; GO:0043167,ion binding; GO:0043169,cation binding; GO:0003723,RNA binding; GO:0005575,cellular_component; GO:0005622,intracellular…	PF00642.24:Zinc finger C-x8-C-x5-C-x3-H type (and similar)	C3H	TF	C3H
TraesCS3B02G395900	TRUE	TRUE	FALSE	FALSE	0.63	0.72	1.36	0.903333	0.37	0.56	0.18	0.37	0.92	3.42	1.43	1.92333	0.43	0.32	0.61	0.453333	3B	623824481	623830911	+	TraesCS3B02G395900	Delta-1-pyrroline-5-carboxylate synthase [Source:UniProtKB/TrEMBL%3BAcc:A0A077RXE4]	K12657 delta-1-pyrroline-5-carboxylate synthetase [EC:2.7.2.11 1.2.1.41] | (RefSeq) delta-1-pyrroline-5-carboxylate synthase 2 (A)	ko00330: Arginine and proline metabolism; ko01100: Metabolic pathways; ko01110: Biosynthesis of secondary metabolites; ko01230: Biosynthesis of amino acids	unnamed protein product [Triticum aestivum]	P5CS2_ORYSJ RecName: Full=Delta-1-pyrroline-5-carboxylate synthase 2 {ECO:0000305}; Short=OsP5CS2 {ECO:0000303|Ref.7}; Includes: RecName: Full=Glutamate 5-kinase; Short=GK; EC=2.7.2.11; AltName: Full=Gamma-glutamyl kinase; Includes: RecName: Full=Gamma-glutamyl phosphate reductase; Short=GPR; EC=1.2.1.41; AltName: Full=Glutamate-5-semialdehyde dehydrogenase; AltName: Full=Glutamyl-gamma-semialdeh…	A0A077RXE4_WHEAT RecName: Full=Delta-1-pyrroline-5-carboxylate synthase {ECO:0000256|PIRNR:PIRNR036429}; Includes: RecName: Full=Glutamate 5-kinase {ECO:0000256|PIRNR:PIRNR036429}; Short=GK {ECO:0000256|PIRNR:PIRNR036429}; EC=2.7.2.11 {ECO:0000256|PIRNR:PIRNR036429}; AltName: Full=Gamma-glutamyl kinase {ECO:0000256|PIRNR:PIRNR036429}; Includes: RecName: Full=Gamma-glutamyl phosphate reductase {EC…	At3g55610_2	GO:0005737,cytoplasm; GO:0005524,ATP binding; GO:0004349,glutamate 5-kinase activity; GO:0004350,glutamate-5-semialdehyde dehydrogenase activity; GO:0055129,L-proline biosynthetic process; GO:0006561,proline biosynthetic process; GO:0000166,nucleotide binding; GO:0003674,molecular_function; GO:0005488,binding; GO:0017076,purine nucleotide binding; GO:0030554,adenyl nucleotide binding; GO:0032553,…	PF00696.28:Amino acid kinase family	--	--	--
TraesCS3B02G392500	TRUE	FALSE	FALSE	FALSE	1.91	2.15	1.86	1.97333	5.62	5.67	15.69	8.99333	1.93	2.33	3.53	2.59667	9.42	2.49	5.55	5.82	3B	618002227	618003379	+	TraesCS3B02G392500	--	K01803 triosephosphate isomerase (TIM) [EC:5.3.1.1] | (RefSeq) triosephosphate isomerase, cytosolic (A)	ko00010: Glycolysis / Gluconeogenesis; ko00051: Fructose and mannose metabolism; ko00562: Inositol phosphate metabolism; ko00710: Carbon fixation in photosynthetic organisms; ko01100: Metabolic pathways; ko01110: Biosynthesis of secondary metabolites; ko01200: Carbon metabolism; ko01230: Biosynthesis of amino acids	unnamed protein product [Triticum aestivum]	ERG1_ORYSI RecName: Full=Elicitor-responsive protein 1; AltName: Full=17 kDa phloem protein; AltName: Full=Fungal elicitor immediate early-responsive gene 1 protein; Short=FIERG1; AltName: Full=Rpp17;	A0A077S503_WHEAT RecName: Full=C2 domain-containing protein {ECO:0000259|PROSITE:PS50004};	At3g55470	GO:0005737,cytoplasm; GO:0005886,plasma membrane; GO:0005544,calcium-dependent phospholipid binding; GO:0046872,metal ion binding; GO:0003674,molecular_function; GO:0005488,binding; GO:0005543,phospholipid binding; GO:0008289,lipid binding; GO:0043167,ion binding; GO:0043169,cation binding; GO:0005575,cellular_component; GO:0005622,intracellular anatomical structure; GO:0110165,cellular anatomica…	PF00168.30:C2 domain	--	--	--
TraesCS3B02G392100	TRUE	FALSE	FALSE	FALSE	2.95	2.2	1.37	2.17333	0.55	0.95	1.18	0.893333	1.98	1.17	1.48	1.54333	1.42	0.15	0.2	0.59	3B	617681660	617683373	+	TraesCS3B02G392100	--	K01803 triosephosphate isomerase (TIM) [EC:5.3.1.1] | (RefSeq) triosephosphate isomerase, cytosolic (A)	ko00010: Glycolysis / Gluconeogenesis; ko00051: Fructose and mannose metabolism; ko00562: Inositol phosphate metabolism; ko00710: Carbon fixation in photosynthetic organisms; ko01100: Metabolic pathways; ko01110: Biosynthesis of secondary metabolites; ko01200: Carbon metabolism; ko01230: Biosynthesis of amino acids	Elicitor-responsive protein 1 [Triticum urartu]	ERG1_ORYSI RecName: Full=Elicitor-responsive protein 1; AltName: Full=17 kDa phloem protein; AltName: Full=Fungal elicitor immediate early-responsive gene 1 protein; Short=FIERG1; AltName: Full=Rpp17;	A0A446Q4V8_TRITD RecName: Full=C2 domain-containing protein {ECO:0000259|PROSITE:PS50004};	At3g55470	GO:0005737,cytoplasm; GO:0005886,plasma membrane; GO:0005544,calcium-dependent phospholipid binding; GO:0046872,metal ion binding; GO:0003674,molecular_function; GO:0005488,binding; GO:0005543,phospholipid binding; GO:0008289,lipid binding; GO:0043167,ion binding; GO:0043169,cation binding; GO:0005575,cellular_component; GO:0005622,intracellular anatomical structure; GO:0110165,cellular anatomica…	PF00168.30:C2 domain	--	--	--
TraesCS3B02G292900	TRUE	FALSE	FALSE	FALSE	7.31	7.41	10.04	8.25333	2.49	3.88	2.65	3.00667	4.87	7.47	5.25	5.86333	4.66	6.96	3.56	5.06	3B	471474811	471480092	+	TraesCS3B02G292900	--	K01733 threonine synthase [EC:4.2.3.1] | (RefSeq) threonine synthase, chloroplastic-like (A)	ko00260: Glycine, serine and threonine metabolism; ko00750: Vitamin B6 metabolism; ko01100: Metabolic pathways; ko01110: Biosynthesis of secondary metabolites; ko01230: Biosynthesis of amino acids	threonine synthase, chloroplastic-like [Aegilops tauschii subsp. tauschii]	THRC_SOLTU RecName: Full=Threonine synthase, chloroplastic; Short=TS; EC=4.2.3.1; Flags: Precursor;	A0A3B6FNB6_WHEAT RecName: Full=PALP domain-containing protein {ECO:0000259|Pfam:PF00291};	At4g29840	GO:0009507,chloroplast; GO:0005737,cytoplasm; GO:0030170,pyridoxal phosphate binding; GO:0004795,threonine synthase activity; GO:0009088,threonine biosynthetic process; GO:0003674,molecular_function; GO:0005488,binding; GO:0019842,vitamin binding; GO:0036094,small molecule binding; GO:0043167,ion binding; GO:0043168,anion binding; GO:0070279,vitamin B6 binding; GO:0097159,organic cyclic compound …	PF00291.25:Pyridoxal-phosphate dependent enzyme	--	--	--
TraesCS3B02G215100	TRUE	FALSE	FALSE	FALSE	4.29	4.76	5.32	4.79	10.51	12.75	11.94	11.7333	8.13	10.11	9.56	9.26667	15.57	19.46	12.17	15.7333	3B	256199190	256205960	-	TraesCS3B02G215100	Hydroxymethylglutaryl-CoA lyase%2C mitochondrial [Source:Projected from Arabidopsis thaliana (AT2G26800) UniProtKB/Swiss-Prot%3BAcc:O81027]	K01640 hydroxymethylglutaryl-CoA lyase [EC:4.1.3.4] | (RefSeq) hydroxymethylglutaryl-CoA lyase, mitochondrial-like isoform X1 (A)	ko00280: Valine, leucine and isoleucine degradation; ko00650: Butanoate metabolism; ko01100: Metabolic pathways; ko01110: Biosynthesis of secondary metabolites; ko04146: Peroxisome	unnamed protein product [Triticum aestivum]	HMGCL_ARATH RecName: Full=Hydroxymethylglutaryl-CoA lyase, mitochondrial; Short=HL; Short=HMG-CoA lyase; EC=4.1.3.4; AltName: Full=3-hydroxy-3-methylglutarate-CoA lyase;	A0A3B6FKC8_WHEAT RecName: Full=Hydroxymethylglutaryl-CoA lyase {ECO:0000256|ARBA:ARBA00012910}; EC=4.1.3.4 {ECO:0000256|ARBA:ARBA00012910};	At2g26800	GO:0005759,mitochondrial matrix; GO:0005739,mitochondrion; GO:0004419,hydroxymethylglutaryl-CoA lyase activity; GO:0046872,metal ion binding; GO:0046951,ketone body biosynthetic process; GO:0006552,leucine catabolic process; GO:0006629,lipid metabolic process; GO:0003674,molecular_function; GO:0003824,catalytic activity; GO:0016829,lyase activity; GO:0016830,carbon-carbon lyase activity; GO:00168…	PF00682.19:HMGL-like	--	--	--
TraesCS3B02G097800	TRUE	TRUE	FALSE	FALSE	1.45	1.69	1.27	1.47	0.42	0.19	0.03	0.213333	1.73	1.54	1.52	1.59667	0.09	0.46	0.11	0.22	3B	65358509	65360980	-	TraesCS3B02G097800	Probable inactive shikimate kinase like 1%2C chloroplastic [Source:Projected from Arabidopsis thaliana (AT3G26900) UniProtKB/Swiss-Prot%3BAcc:Q9LW20]	K00891 shikimate kinase [EC:2.7.1.71] | (RefSeq) shikimate kinase, chloroplastic (A)	ko00400: Phenylalanine, tyrosine and tryptophan biosynthesis; ko01100: Metabolic pathways; ko01110: Biosynthesis of secondary metabolites; ko01230: Biosynthesis of amino acids	shikimate kinase family protein [Triticum monococcum]	SKL1_ARATH RecName: Full=Probable inactive shikimate kinase like 1, chloroplastic; Short=AtSKL1; Flags: Precursor;	A0A446PDZ5_TRITD SubName: Full=Uncharacterized protein {ECO:0000313|EMBL:VAH72719.1};	At3g26900	GO:0009507,chloroplast; GO:0009570,chloroplast stroma; GO:0005829,cytosol; GO:0009658,chloroplast organization; GO:0016310,phosphorylation; GO:0010027,thylakoid membrane organization; GO:0006996,organelle organization; GO:0008150,biological_process; GO:0009657,plastid organization; GO:0009987,cellular process; GO:0016043,cellular component organization; GO:0071840,cellular component organization …	PF01202.22:Shikimate kinase	--	--	--
TraesCS3B02G008700	TRUE	TRUE	FALSE	FALSE	7.74	7.36	6.85	7.31667	11.86	14.11	26.76	17.5767	7.44	5.69	7.25	6.79333	17.54	23.17	11.1	17.27	3B	4327923	4331959	-	TraesCS3B02G008700	--	K00626 acetyl-CoA C-acetyltransferase [EC:2.3.1.9] | (RefSeq) acetyl-CoA acetyltransferase, cytosolic 1-like (A)	ko00071: Fatty acid degradation; ko00280: Valine, leucine and isoleucine degradation; ko00310: Lysine degradation; ko00380: Tryptophan metabolism; ko00620: Pyruvate metabolism; ko00630: Glyoxylate and dicarboxylate metabolism; ko00650: Butanoate metabolism; ko00900: Terpenoid backbone biosynthesis; ko01100: Metabolic pathways; ko01110: Biosynthesis of secondary metabolites; ko01200: Carbon metabo…	unnamed protein product [Triticum aestivum]	THIC2_ARATH RecName: Full=Probable acetyl-CoA acetyltransferase, cytosolic 2; EC=2.3.1.9; AltName: Full=Cytosolic acetoacetyl-CoA thiolase 2; Short=Thiolase 2;	W5CVJ9_WHEAT SubName: Full=Uncharacterized protein {ECO:0000313|EMBL:CDM80037.1, ECO:0000313|EnsemblPlants:TraesCS3B02G008700.1};	At5g47720	GO:0005737,cytoplasm; GO:0003985,acetyl-CoA C-acetyltransferase activity; GO:0046872,metal ion binding; GO:0006635,fatty acid beta-oxidation; GO:0003674,molecular_function; GO:0003824,catalytic activity; GO:0003988,acetyl-CoA C-acyltransferase activity; GO:0016407,acetyltransferase activity; GO:0016408,C-acyltransferase activity; GO:0016453,C-acetyltransferase activity; GO:0016740,transferase act…	PF00108.23:Thiolase, N-terminal domain	--	--	--
TraesCS3B02G006100	TRUE	FALSE	FALSE	FALSE	5.25	3.13	2	3.46	1.88	1.88	1.1	1.62	3.45	3.42	3.99	3.62	3.48	3.96	2.57	3.33667	3B	3268840	3271894	+	TraesCS3B02G006100	3-isopropylmalate dehydrogenase [Source:UniProtKB/TrEMBL%3BAcc:A0A077RNY6]	K00052 3-isopropylmalate dehydrogenase [EC:1.1.1.85] | (RefSeq) 3-isopropylmalate dehydrogenase 2, chloroplastic-like (A)	ko00290: Valine, leucine and isoleucine biosynthesis; ko00660: C5-Branched dibasic acid metabolism; ko01100: Metabolic pathways; ko01110: Biosynthesis of secondary metabolites; ko01210: 2-Oxocarboxylic acid metabolism; ko01230: Biosynthesis of amino acids	unnamed protein product [Triticum aestivum]	LEU32_ARATH RecName: Full=3-isopropylmalate dehydrogenase 2, chloroplastic {ECO:0000303|PubMed:15849421}; Short=3-IPM-DH 2 {ECO:0000303|PubMed:15849421}; Short=AtIMDH2 {ECO:0000303|PubMed:15849421}; Short=AtIMDH3 {ECO:0000303|PubMed:19674406}; Short=IMDH 2 {ECO:0000303|PubMed:15849421}; EC=1.1.1.85 {ECO:0000269|PubMed:15849421, ECO:0000269|PubMed:20840499}; AltName: Full=Beta-IPM dehydrogenase 2 …	A0A077RNY6_WHEAT RecName: Full=3-isopropylmalate dehydrogenase {ECO:0000256|ARBA:ARBA00013101, ECO:0000256|RuleBase:RU004445}; EC=1.1.1.85 {ECO:0000256|ARBA:ARBA00013101, ECO:0000256|RuleBase:RU004445};	At1g80560	GO:0009507,chloroplast; GO:0009941,chloroplast envelope; GO:0009570,chloroplast stroma; GO:0005829,cytosol; GO:0009536,plastid; GO:0003862,3-isopropylmalate dehydrogenase activity; GO:0000287,magnesium ion binding; GO:0070403,NAD+ binding; GO:0042803,protein homodimerization activity; GO:0009082,branched-chain amino acid biosynthetic process; GO:0009553,embryo sac development; GO:0009098,leucine …	PF00180.20:Isocitrate/isopropylmalate dehydrogenase	--	--	--
TraesCS3B02G000400	TRUE	FALSE	FALSE	FALSE	1.77	1.48	1.52	1.59	0.44	0.76	0.18	0.46	1.49	0.99	1.18	1.22	0.64	1.17	0.96	0.923333	3B	334498	337790	+	TraesCS3B02G000400	--	K01968 3-methylcrotonyl-CoA carboxylase alpha subunit [EC:6.4.1.4] | (RefSeq) LOW QUALITY PROTEIN: methylcrotonoyl-CoA carboxylase subunit alpha, mitochondrial-like (A)	ko00280: Valine, leucine and isoleucine degradation; ko01100: Metabolic pathways	serine/threonine-protein kinase HT1-like [Aegilops tauschii subsp. tauschii]	HT1_ARATH RecName: Full=Serine/threonine/tyrosine-protein kinase HT1 {ECO:0000305}; EC=2.7.10.1 {ECO:0000305|PubMed:30361234}; EC=2.7.11.1 {ECO:0000255|PROSITE-ProRule:PRU00159, ECO:0000269|PubMed:16518390, ECO:0000269|PubMed:27694184, ECO:0000269|PubMed:27923039}; AltName: Full=High leaf temperature protein 1 {ECO:0000303|PubMed:16518390};	A0A3B6FE47_WHEAT RecName: Full=Protein kinase domain-containing protein {ECO:0000259|PROSITE:PS50011};	At1g62400	GO:0005737,cytoplasm; GO:0005886,plasma membrane; GO:0005524,ATP binding; GO:0004672,protein kinase activity; GO:0106310,protein serine kinase activity; GO:0004674,protein serine/threonine kinase activity; GO:0106311,protein threonine kinase activity; GO:0004714,transmembrane receptor protein tyrosine kinase activity; GO:0071244,cellular response to carbon dioxide; GO:0046777,protein autophosphor…	PF07714.17:Protein tyrosine kinase	--	--	--
TraesCS3A02G423200	TRUE	FALSE	FALSE	FALSE	7.32	6.24	8.49	7.35	2.51	2.63	2.78	2.64	7.08	4.88	7.05	6.33667	3.92	3.46	3.77	3.71667	3A	664691550	664697238	-	TraesCS3A02G423200	--	K13832 3-dehydroquinate dehydratase / shikimate dehydrogenase [EC:4.2.1.10 1.1.1.25] | (RefSeq) bifunctional 3-dehydroquinate dehydratase/shikimate dehydrogenase, chloroplastic-like isoform X1 (A)	ko00400: Phenylalanine, tyrosine and tryptophan biosynthesis; ko00999: Biosynthesis of various plant secondary metabolites; ko01100: Metabolic pathways; ko01110: Biosynthesis of secondary metabolites; ko01230: Biosynthesis of amino acids	zinc finger CCCH domain-containing protein 12-like [Aegilops tauschii subsp. tauschii]	C3H12_ORYSJ RecName: Full=Zinc finger CCCH domain-containing protein 12; Short=OsC3H12; AltName: Full=Zinc finger CCCH domain-containing protein ZFN-like 2;	A0A446NZV7_TRITD SubName: Full=Uncharacterized protein {ECO:0000313|EMBL:VAH67683.1};	At3g02830	GO:0005634,nucleus; GO:0003677,DNA binding; GO:0046872,metal ion binding; GO:0003729,mRNA binding; GO:0003674,molecular_function; GO:0003676,nucleic acid binding; GO:0005488,binding; GO:0097159,organic cyclic compound binding; GO:1901363,heterocyclic compound binding; GO:0043167,ion binding; GO:0043169,cation binding; GO:0003723,RNA binding; GO:0005575,cellular_component; GO:0005622,intracellular…	PF00642.24:Zinc finger C-x8-C-x5-C-x3-H type (and similar)	C3H	TF	C3H
TraesCS3A02G359400	TRUE	TRUE	TRUE	FALSE	1.28	1.09	1.18	1.18333	0.42	0.62	0.29	0.443333	1.71	4.24	4.25	3.4	0.88	0.62	0.56	0.686667	3A	607443297	607446882	+	TraesCS3A02G359400	--	K01803 triosephosphate isomerase (TIM) [EC:5.3.1.1] | (RefSeq) triosephosphate isomerase, cytosolic-like isoform X1 (A)	ko00010: Glycolysis / Gluconeogenesis; ko00051: Fructose and mannose metabolism; ko00562: Inositol phosphate metabolism; ko00710: Carbon fixation in photosynthetic organisms; ko01100: Metabolic pathways; ko01110: Biosynthesis of secondary metabolites; ko01200: Carbon metabolism; ko01230: Biosynthesis of amino acids	hypothetical protein PAHAL_E00997 [Panicum hallii]	TPIS_COPJA RecName: Full=Triosephosphate isomerase, cytosolic; Short=TIM; Short=Triose-phosphate isomerase; EC=5.3.1.1;	A0A446Q4Y4_TRITD SubName: Full=Uncharacterized protein {ECO:0000313|EMBL:VAH81662.1};	At3g55440	GO:0005737,cytoplasm; GO:0004807,triose-phosphate isomerase activity; GO:0006094,gluconeogenesis; GO:0006096,glycolytic process; GO:0003674,molecular_function; GO:0003824,catalytic activity; GO:0016853,isomerase activity; GO:0016860,intramolecular oxidoreductase activity; GO:0016861,intramolecular oxidoreductase activity, interconverting aldoses and ketoses; GO:0005975,carbohydrate metabolic proc…	PF00121.18:Triosephosphate isomerase	--	--	--
TraesCS3A02G291100	TRUE	FALSE	TRUE	FALSE	6.33	4.1	4.46	4.96333	2.23	2.76	1.24	2.07667	2.52	3	1.85	2.45667	1.97	1.54	1.6	1.70333	3A	521304582	521308586	-	TraesCS3A02G291100	--	K05605 3-hydroxyisobutyryl-CoA hydrolase [EC:3.1.2.4] | (RefSeq) 3-hydroxyisobutyryl-CoA hydrolase-like protein 5 (A)	ko00280: Valine, leucine and isoleucine degradation; ko00410: beta-Alanine metabolism; ko00640: Propanoate metabolism; ko01100: Metabolic pathways; ko01200: Carbon metabolism	3-hydroxyisobutyryl-CoA hydrolase-like protein 5 isoform X2 [Aegilops tauschii subsp. tauschii]	HIBC8_ARATH RecName: Full=3-hydroxyisobutyryl-CoA hydrolase-like protein 5; EC=3.1.2.-;	A0A446NPF9_TRITD SubName: Full=Uncharacterized protein {ECO:0000313|EMBL:VAH63981.1};	At1g06550	GO:0005829,cytosol; GO:0005576,extracellular region; GO:0003860,3-hydroxyisobutyryl-CoA hydrolase activity; GO:0080167,response to karrikin; GO:0006574,valine catabolic process; GO:0003674,molecular_function; GO:0003824,catalytic activity; GO:0016289,CoA hydrolase activity; GO:0016787,hydrolase activity; GO:0016788,hydrolase activity, acting on ester bonds; GO:0016790,thiolester hydrolase activit…	PF16113.5:Enoyl-CoA hydratase/isomerase	--	--	--
TraesCS3A02G247500	TRUE	FALSE	FALSE	FALSE	0	0	0.03	0.01	1.15	0.75	1.25	1.05	0	0	0	0	0.05	0.36	0.38	0.263333	3A	465542755	465544070	+	TraesCS3A02G247500	--	K00928 aspartate kinase [EC:2.7.2.4] | (RefSeq) uncharacterized protein LOC123123809 isoform X1 (A)	ko00260: Glycine, serine and threonine metabolism; ko00261: Monobactam biosynthesis; ko00270: Cysteine and methionine metabolism; ko00300: Lysine biosynthesis; ko01100: Metabolic pathways; ko01110: Biosynthesis of secondary metabolites; ko01210: 2-Oxocarboxylic acid metabolism; ko01230: Biosynthesis of amino acids	NAC domain-containing protein 92-like [Aegilops tauschii subsp. tauschii]	NAC54_ARATH RecName: Full=Protein CUP-SHAPED COTYLEDON 1; AltName: Full=NAC domain-containing protein 1; AltName: Full=NAC domain-containing protein 54; Short=ANAC054; AltName: Full=NAC domain-containing protein CUC1;	A0A3B6EJ44_WHEAT RecName: Full=NAC domain-containing protein {ECO:0000259|PROSITE:PS51005};	At3g55210	GO:0005634,nucleus; GO:0003700,DNA-binding transcription factor activity; GO:0000976,transcription regulatory region sequence-specific DNA binding; GO:0009908,flower development; GO:0090691,formation of plant organ boundary; GO:0048527,lateral root development; GO:0010014,meristem initiation; GO:0051782,negative regulation of cell division; GO:0010072,primary shoot apical meristem specification; …	PF02365.15:No apical meristem (NAM) protein	NAC	TF	NAC
TraesCS3A02G196700	TRUE	FALSE	FALSE	FALSE	7.6	5.67	4.71	5.99333	2.26	2.55	2.98	2.59667	5.64	6.07	4.49	5.4	2.76	4.22	3.53	3.50333	3A	301120494	301143905	-	TraesCS3A02G196700	--	K13832 3-dehydroquinate dehydratase / shikimate dehydrogenase [EC:4.2.1.10 1.1.1.25] | (RefSeq) bifunctional 3-dehydroquinate dehydratase/shikimate dehydrogenase, chloroplastic-like (A)	ko00400: Phenylalanine, tyrosine and tryptophan biosynthesis; ko00999: Biosynthesis of various plant secondary metabolites; ko01100: Metabolic pathways; ko01110: Biosynthesis of secondary metabolites; ko01230: Biosynthesis of amino acids	bifunctional 3-dehydroquinate dehydratase/shikimate dehydrogenase, chloroplastic-like isoform X1 [Aegilops tauschii subsp. tauschii]	DHQSD_ARATH RecName: Full=Bifunctional 3-dehydroquinate dehydratase/shikimate dehydrogenase, chloroplastic; Short=DHQ-SDH protein; AltName: Full=DHQase-SORase; AltName: Full=Protein EMBRYO DEFECTIVE 3004; Includes: RecName: Full=Dehydroquinate dehydratase; Short=DHQ; EC=4.2.1.10; Includes: RecName: Full=Shikimate dehydrogenase; Short=SDH; EC=1.1.1.25; Flags: Precursor;	A0A446NEU4_TRITD RecName: Full=Shikimate dehydrogenase {ECO:0000256|ARBA:ARBA00012962}; EC=1.1.1.25 {ECO:0000256|ARBA:ARBA00012962};	At3g06350	GO:0009507,chloroplast; GO:0009570,chloroplast stroma; GO:0003855,3-dehydroquinate dehydratase activity; GO:0050661,NADP binding; GO:0004764,shikimate 3-dehydrogenase (NADP+) activity; GO:0009073,aromatic amino acid family biosynthetic process; GO:0008652,cellular amino acid biosynthetic process; GO:0009423,chorismate biosynthetic process; GO:0009793,embryo development ending in seed dormancy; GO…	PF01487.15:Type I 3-dehydroquinase	--	--	--
TraesCS3A02G195300	TRUE	TRUE	FALSE	FALSE	37.65	31.49	28.88	32.6733	10.31	12.23	10.57	11.0367	21.34	19.94	30.4	23.8933	6.05	11.14	15.05	10.7467	3A	279435212	279437680	-	TraesCS3A02G195300	S-adenosylmethionine synthase [Source:UniProtKB/TrEMBL%3BAcc:A0A341RYI7]	K00789 S-adenosylmethionine synthetase [EC:2.5.1.6] | (RefSeq) S-adenosylmethionine synthase 1-like (A)	ko00270: Cysteine and methionine metabolism; ko00999: Biosynthesis of various plant secondary metabolites; ko01100: Metabolic pathways; ko01110: Biosynthesis of secondary metabolites; ko01230: Biosynthesis of amino acids; ko01240: Biosynthesis of cofactors	S-adenosylmethionine synthase 1 [Triticum urartu]	METK1_TRIMO RecName: Full=S-adenosylmethionine synthase 1; Short=AdoMet synthase 1; EC=2.5.1.6 {ECO:0000250|UniProtKB:Q96551}; AltName: Full=Methionine adenosyltransferase 1; Short=MAT 1;	A0A446NEV3_TRITD RecName: Full=S-adenosylmethionine synthase {ECO:0000256|RuleBase:RU000541}; EC=2.5.1.6 {ECO:0000256|RuleBase:RU000541};	At4g01850	GO:0005737,cytoplasm; GO:0005524,ATP binding; GO:0046872,metal ion binding; GO:0004478,methionine adenosyltransferase activity; GO:0006730,one-carbon metabolic process; GO:0006556,S-adenosylmethionine biosynthetic process; GO:0000166,nucleotide binding; GO:0003674,molecular_function; GO:0005488,binding; GO:0017076,purine nucleotide binding; GO:0030554,adenyl nucleotide binding; GO:0032553,ribonuc…	PF02773.16:S-adenosylmethionine synthetase, C-terminal domain	--	--	--
TraesCS3A02G003800	TRUE	FALSE	FALSE	FALSE	19.89	21.49	21.11	20.83	47.92	43.29	64.92	52.0433	25.19	20.95	21.34	22.4933	39.27	47.37	37.06	41.2333	3A	1919555	1923009	+	TraesCS3A02G003800	--	K00626 acetyl-CoA C-acetyltransferase [EC:2.3.1.9] | (RefSeq) acetyl-CoA acetyltransferase, cytosolic 1-like (A)	ko00071: Fatty acid degradation; ko00280: Valine, leucine and isoleucine degradation; ko00310: Lysine degradation; ko00380: Tryptophan metabolism; ko00620: Pyruvate metabolism; ko00630: Glyoxylate and dicarboxylate metabolism; ko00650: Butanoate metabolism; ko00900: Terpenoid backbone biosynthesis; ko01100: Metabolic pathways; ko01110: Biosynthesis of secondary metabolites; ko01200: Carbon metabo…	acetyl-CoA acetyltransferase, cytosolic 1-like [Aegilops tauschii subsp. tauschii]	THIC2_ARATH RecName: Full=Probable acetyl-CoA acetyltransferase, cytosolic 2; EC=2.3.1.9; AltName: Full=Cytosolic acetoacetyl-CoA thiolase 2; Short=Thiolase 2;	A0A3B6EAD8_WHEAT SubName: Full=Uncharacterized protein {ECO:0000313|EnsemblPlants:TraesCS3A02G003800.1};	At5g47720	GO:0005737,cytoplasm; GO:0003985,acetyl-CoA C-acetyltransferase activity; GO:0046872,metal ion binding; GO:0006635,fatty acid beta-oxidation; GO:0003674,molecular_function; GO:0003824,catalytic activity; GO:0003988,acetyl-CoA C-acyltransferase activity; GO:0016407,acetyltransferase activity; GO:0016408,C-acyltransferase activity; GO:0016453,C-acetyltransferase activity; GO:0016740,transferase act…	PF00108.23:Thiolase, N-terminal domain	--	--	--
TraesCS2D02G601500	TRUE	FALSE	FALSE	FALSE	2.24	2.65	2.12	2.33667	0.41	0.66	1.29	0.786667	1.48	1.06	1.83	1.45667	0.6	0.03	0.42	0.35	2D	651693292	651694914	+	TraesCS2D02G601500	--	K01803 triosephosphate isomerase (TIM) [EC:5.3.1.1] | (RefSeq) triosephosphate isomerase, cytosolic-like (A)	ko00010: Glycolysis / Gluconeogenesis; ko00051: Fructose and mannose metabolism; ko00562: Inositol phosphate metabolism; ko00710: Carbon fixation in photosynthetic organisms; ko01100: Metabolic pathways; ko01110: Biosynthesis of secondary metabolites; ko01200: Carbon metabolism; ko01230: Biosynthesis of amino acids	Elicitor-responsive protein 3 [Triticum urartu]	ERG3_ORYSI RecName: Full=Elicitor-responsive protein 3; AltName: Full=16 kDa phloem protein; AltName: Full=RPP16;	A0A453DHH0_AEGTS RecName: Full=C2 domain-containing protein {ECO:0000259|PROSITE:PS50004};	At1g63220	GO:0005737,cytoplasm; GO:0046872,metal ion binding; GO:0003674,molecular_function; GO:0005488,binding; GO:0043167,ion binding; GO:0043169,cation binding; GO:0005575,cellular_component; GO:0005622,intracellular anatomical structure; GO:0110165,cellular anatomical entity	PF00168.30:C2 domain	--	--	--
TraesCS2D02G561700	TRUE	TRUE	FALSE	FALSE	25.21	24.45	28.76	26.14	11.47	14.58	8.01	11.3533	23.74	118.94	46.33	63.0033	12.39	23.86	22.25	19.5	2D	633847433	633852003	+	TraesCS2D02G561700	Pyruvate kinase [Source:UniProtKB/TrEMBL%3BAcc:A0A1D5UPJ6]	K00873 pyruvate kinase [EC:2.7.1.40] | (RefSeq) pyruvate kinase, cytosolic isozyme-like (A)	ko00010: Glycolysis / Gluconeogenesis; ko00620: Pyruvate metabolism; ko01100: Metabolic pathways; ko01110: Biosynthesis of secondary metabolites; ko01200: Carbon metabolism; ko01230: Biosynthesis of amino acids	pyruvate kinase, cytosolic isozyme-like [Aegilops tauschii subsp. tauschii]	KPYC_SOLTU RecName: Full=Pyruvate kinase, cytosolic isozyme; Short=PK; EC=2.7.1.40;	A0A1D5UPJ6_WHEAT RecName: Full=Pyruvate kinase {ECO:0000256|ARBA:ARBA00012142, ECO:0000256|RuleBase:RU000504}; EC=2.7.1.40 {ECO:0000256|ARBA:ARBA00012142, ECO:0000256|RuleBase:RU000504};	At5g08570	GO:0005737,cytoplasm; GO:0005524,ATP binding; GO:0016301,kinase activity; GO:0000287,magnesium ion binding; GO:0030955,potassium ion binding; GO:0004743,pyruvate kinase activity; GO:0006096,glycolytic process; GO:0000166,nucleotide binding; GO:0003674,molecular_function; GO:0005488,binding; GO:0017076,purine nucleotide binding; GO:0030554,adenyl nucleotide binding; GO:0032553,ribonucleotide bindi…	PF00224.21:Pyruvate kinase, barrel domain	--	--	--
TraesCS2D02G412800	TRUE	TRUE	TRUE	FALSE	3.55	2.38	3.26	3.06333	0.36	0.67	0.31	0.446667	1.82	0.93	1.54	1.43	0.29	0.31	0.27	0.29	2D	527490907	527493739	+	TraesCS2D02G412800	--	K01620 threonine aldolase [EC:4.1.2.48] | (RefSeq) probable low-specificity L-threonine aldolase 1 (A)	ko00260: Glycine, serine and threonine metabolism; ko01100: Metabolic pathways; ko01110: Biosynthesis of secondary metabolites; ko01230: Biosynthesis of amino acids	probable low-specificity L-threonine aldolase 1 [Aegilops tauschii subsp. tauschii]	THA1_ARATH RecName: Full=Probable low-specificity L-threonine aldolase 1; EC=4.1.2.48; AltName: Full=Threonine aldolase 1;	A0A7H4LLP4_WHEAT SubName: Full=Genome assembly, chromosome: II {ECO:0000313|EMBL:SPT19532.1};	At1g08630	GO:0005829,cytosol; GO:0008732,L-allo-threonine aldolase activity; GO:0004793,threonine aldolase activity; GO:0006545,glycine biosynthetic process; GO:0006567,threonine catabolic process; GO:0003674,molecular_function; GO:0003824,catalytic activity; GO:0016829,lyase activity; GO:0016830,carbon-carbon lyase activity; GO:0016832,aldehyde-lyase activity; GO:0006082,organic acid metabolic process; GO…	PF01212.21:Beta-eliminating lyase	--	--	--
TraesCS2D02G395700	TRUE	TRUE	FALSE	FALSE	0.03	0.09	0.25	0.123333	0.48	0.44	0.75	0.556667	0.05	0.02	0.04	0.0366667	0.32	0.58	0.25	0.383333	2D	506789793	506793407	-	TraesCS2D02G395700	SLAC1 [Source:Projected from Arabidopsis thaliana (AT1G12480) UniProtKB/TrEMBL%3BAcc:A0A178WLC1]	K01714 4-hydroxy-tetrahydrodipicolinate synthase [EC:4.3.3.7] | (RefSeq) 4-hydroxy-tetrahydrodipicolinate synthase 2, chloroplastic (A)	ko00261: Monobactam biosynthesis; ko00300: Lysine biosynthesis; ko01100: Metabolic pathways; ko01110: Biosynthesis of secondary metabolites; ko01230: Biosynthesis of amino acids	guard cell S-type anion channel SLAC1 [Aegilops tauschii subsp. tauschii]	SLAC1_ARATH RecName: Full=Guard cell S-type anion channel SLAC1 {ECO:0000305}; AltName: Full=Protein CARBON DIOXIDE INSENSITIVE 3 {ECO:0000305}; AltName: Full=Protein OZONE-SENSITIVE 1 {ECO:0000303|PubMed:18084014}; AltName: Full=Protein RADICAL-INDUCED CELL DEATH 3 {ECO:0000303|Ref.4}; AltName: Full=Protein SLOW ANION CHANNEL-ASSOCIATED 1 {ECO:0000303|PubMed:18305482};	A0A3B6DHR2_WHEAT SubName: Full=Uncharacterized protein {ECO:0000313|EnsemblPlants:TraesCS2D02G395700.1};	At1g12480	GO:0016021,integral component of membrane; GO:0005886,plasma membrane; GO:0008509,anion transmembrane transporter activity; GO:0019901,protein kinase binding; GO:0019903,protein phosphatase binding; GO:0008308,voltage-gated anion channel activity; GO:0009738,abscisic acid-activated signaling pathway; GO:0006820,anion transport; GO:0006873,cellular ion homeostasis; GO:0015698,inorganic anion trans…	PF03595.17:Voltage-dependent anion channel	--	--	--
TraesCS2D02G386700	TRUE	FALSE	FALSE	FALSE	1.37	1.2	1.34	1.30333	0.41	0.48	0.11	0.333333	0.58	1.04	0.71	0.776667	0.29	0.39	0.59	0.423333	2D	491809879	491814777	-	TraesCS2D02G386700	Aldehyde dehydrogenase [Source:UniProtKB/TrEMBL%3BAcc:A0A1D5UK85]	K00128 aldehyde dehydrogenase (NAD+) [EC:1.2.1.3] | (RefSeq) aldehyde dehydrogenase family 3 member F1-like isoform X1 (A)	ko00010: Glycolysis / Gluconeogenesis; ko00053: Ascorbate and aldarate metabolism; ko00071: Fatty acid degradation; ko00280: Valine, leucine and isoleucine degradation; ko00310: Lysine degradation; ko00330: Arginine and proline metabolism; ko00340: Histidine metabolism; ko00380: Tryptophan metabolism; ko00410: beta-Alanine metabolism; ko00561: Glycerolipid metabolism; ko00620: Pyruvate metabolism…	aldehyde dehydrogenase family 3 member F1-like isoform X2 [Aegilops tauschii subsp. tauschii]	AL3F1_ARATH RecName: Full=Aldehyde dehydrogenase family 3 member F1; EC=1.2.1.3;	A0A3B6DHZ8_WHEAT RecName: Full=Aldehyde dehydrogenase {ECO:0000256|PIRNR:PIRNR036492};	At4g36250	GO:0005783,endoplasmic reticulum; GO:0005886,plasma membrane; GO:0004028,3-chloroallyl aldehyde dehydrogenase activity; GO:0004029,aldehyde dehydrogenase (NAD+) activity; GO:0043878,glyceraldehyde-3-phosphate dehydrogenase (NAD+) (non-phosphorylating) activity; GO:0006081,cellular aldehyde metabolic process; GO:0003674,molecular_function; GO:0003824,catalytic activity; GO:0016491,oxidoreductase a…	PF00171.22:Aldehyde dehydrogenase family	--	--	--
TraesCS2D02G331200	TRUE	FALSE	TRUE	FALSE	14.84	13.51	17.64	15.33	7.33	8.28	5.99	7.2	8.73	7.9	9.12	8.58333	10.77	8.01	10.91	9.89667	2D	423860480	423865079	-	TraesCS2D02G331200	ATP-dependent 6-phosphofructokinase [Source:UniProtKB/TrEMBL%3BAcc:A0A1D5UP90]	K00850 6-phosphofructokinase 1 [EC:2.7.1.11] | (RefSeq) ATP-dependent 6-phosphofructokinase 2 (A)	ko00010: Glycolysis / Gluconeogenesis; ko00030: Pentose phosphate pathway; ko00051: Fructose and mannose metabolism; ko00052: Galactose metabolism; ko01100: Metabolic pathways; ko01110: Biosynthesis of secondary metabolites; ko01200: Carbon metabolism; ko01230: Biosynthesis of amino acids; ko03018: RNA degradation	ATP-dependent 6-phosphofructokinase 2 [Aegilops tauschii subsp. tauschii]	PFKA2_ARATH RecName: Full=ATP-dependent 6-phosphofructokinase 2 {ECO:0000255|HAMAP-Rule:MF_03186}; Short=ATP-PFK 2 {ECO:0000255|HAMAP-Rule:MF_03186}; Short=Phosphofructokinase 2 {ECO:0000255|HAMAP-Rule:MF_03186}; EC=2.7.1.11 {ECO:0000255|HAMAP-Rule:MF_03186}; AltName: Full=Phosphohexokinase 2 {ECO:0000255|HAMAP-Rule:MF_03186};	A0A1D5UP90_WHEAT RecName: Full=ATP-dependent 6-phosphofructokinase {ECO:0000256|HAMAP-Rule:MF_03186}; Short=ATP-PFK {ECO:0000256|HAMAP-Rule:MF_03186}; Short=Phosphofructokinase {ECO:0000256|HAMAP-Rule:MF_03186}; EC=2.7.1.11 {ECO:0000256|HAMAP-Rule:MF_03186}; AltName: Full=Phosphohexokinase {ECO:0000256|HAMAP-Rule:MF_03186};	At5g47810	GO:0005737,cytoplasm; GO:0005829,cytosol; GO:0003872,6-phosphofructokinase activity; GO:0005524,ATP binding; GO:0046872,metal ion binding; GO:0006002,fructose 6-phosphate metabolic process; GO:0006096,glycolytic process; GO:0003674,molecular_function; GO:0003824,catalytic activity; GO:0008443,phosphofructokinase activity; GO:0016301,kinase activity; GO:0016740,transferase activity; GO:0016772,tra…	PF00365.20:Phosphofructokinase	--	--	--
TraesCS2D02G280700	TRUE	FALSE	FALSE	FALSE	1.65	1.69	1.01	1.45	0.63	0.49	0.29	0.47	0.55	1.7	1.53	1.26	0.48	0.91	0.44	0.61	2D	352904591	352905631	-	TraesCS2D02G280700	--	K01689 enolase [EC:4.2.1.11] | (RefSeq) enolase 1, chloroplastic isoform X1 (A)	ko00010: Glycolysis / Gluconeogenesis; ko01100: Metabolic pathways; ko01110: Biosynthesis of secondary metabolites; ko01200: Carbon metabolism; ko01230: Biosynthesis of amino acids; ko03018: RNA degradation	uncharacterized protein LOC109779015 [Aegilops tauschii subsp. tauschii]	--	M8CN83_AEGTA SubName: Full=Uncharacterized protein {ECO:0000313|EMBL:EMT24981.1, ECO:0000313|EnsemblPlants:EMT24981};	At5g47920	--	PF05553.11:Cotton fibre expressed protein	--	--	--
TraesCS2D02G109900	TRUE	FALSE	FALSE	FALSE	7.18	6.07	5.79	6.34667	9.37	8.93	21.98	13.4267	6.62	10.04	7.42	8.02667	9.95	11.17	10.14	10.42	2D	60942555	60954300	-	TraesCS2D02G109900	Probable acyl-CoA dehydrogenase IBR3 [Source:Projected from Arabidopsis thaliana (AT3G06810) UniProtKB/Swiss-Prot%3BAcc:Q8RWZ3]	K00249 acyl-CoA dehydrogenase [EC:1.3.8.7] | (RefSeq) probable acyl-CoA dehydrogenase IBR3 (A)	ko00071: Fatty acid degradation; ko00280: Valine, leucine and isoleucine degradation; ko01100: Metabolic pathways; ko01110: Biosynthesis of secondary metabolites; ko01212: Fatty acid metabolism	probable acyl-CoA dehydrogenase IBR3 [Aegilops tauschii subsp. tauschii]	IBR3_ARATH RecName: Full=Probable acyl-CoA dehydrogenase IBR3 {ECO:0000305}; EC=1.3.99.- {ECO:0000305}; AltName: Full=Protein INDOLE-3-BUTYRIC ACID RESPONSE 3 {ECO:0000303|PubMed:17277896};	A0A453APW4_AEGTS SubName: Full=Uncharacterized protein {ECO:0000313|EnsemblPlants:AET2Gv20220300.4};	At3g06810	GO:0005777,peroxisome; GO:0050660,flavin adenine dinucleotide binding; GO:0016627,oxidoreductase activity, acting on the CH-CH group of donors; GO:0006631,fatty acid metabolic process; GO:0048767,root hair elongation; GO:0000166,nucleotide binding; GO:0003674,molecular_function; GO:0005488,binding; GO:0036094,small molecule binding; GO:0043167,ion binding; GO:0043168,anion binding; GO:0097159,org…	PF01636.23:Phosphotransferase enzyme family	--	--	--
TraesCS2D02G034900	TRUE	TRUE	FALSE	FALSE	5.6	4.93	5.28	5.27	14.34	13.26	13.97	13.8567	8.18	7.29	6.47	7.31333	18.34	14.39	13.89	15.54	2D	13439965	13444862	-	TraesCS2D02G034900	Arginase [Source:UniProtKB/TrEMBL%3BAcc:G3LT25]	K01476 arginase [EC:3.5.3.1] | (RefSeq) arginase 1, mitochondrial (A)	ko00220: Arginine biosynthesis; ko00330: Arginine and proline metabolism; ko01100: Metabolic pathways; ko01110: Biosynthesis of secondary metabolites; ko01230: Biosynthesis of amino acids	arginase 1, mitochondrial [Aegilops tauschii subsp. tauschii]	ARGI1_ORYSI RecName: Full=Arginase 1, mitochondrial; EC=3.5.3.1 {ECO:0000250|UniProtKB:P05089}; AltName: Full=Arginine amidohydrolase 1; Flags: Precursor;	T1SBH7_WHEAT SubName: Full=Arginase protein {ECO:0000313|EMBL:AGR45902.1};	At4g08900	GO:0005739,mitochondrion; GO:0004053,arginase activity; GO:0030145,manganese ion binding; GO:0006527,arginine catabolic process; GO:0000050,urea cycle; GO:0003674,molecular_function; GO:0003824,catalytic activity; GO:0016787,hydrolase activity; GO:0016810,hydrolase activity, acting on carbon-nitrogen (but not peptide) bonds; GO:0016813,hydrolase activity, acting on carbon-nitrogen (but not peptid…	PF00491.21:Arginase family	--	--	--
TraesCS2B02G598600	TRUE	TRUE	FALSE	FALSE	4.16	8.43	5.48	6.02333	0.56	0.46	1.61	0.876667	4.9	1.54	4.99	3.81	1.04	0.18	0.75	0.656667	2B	781584102	781585699	-	TraesCS2B02G598600	--	K01803 triosephosphate isomerase (TIM) [EC:5.3.1.1] | (RefSeq) triosephosphate isomerase, cytosolic-like (A)	ko00010: Glycolysis / Gluconeogenesis; ko00051: Fructose and mannose metabolism; ko00562: Inositol phosphate metabolism; ko00710: Carbon fixation in photosynthetic organisms; ko01100: Metabolic pathways; ko01110: Biosynthesis of secondary metabolites; ko01200: Carbon metabolism; ko01230: Biosynthesis of amino acids	Elicitor-responsive protein 3 [Triticum urartu]	ERG3_ORYSI RecName: Full=Elicitor-responsive protein 3; AltName: Full=16 kDa phloem protein; AltName: Full=RPP16;	A0A453DHH0_AEGTS RecName: Full=C2 domain-containing protein {ECO:0000259|PROSITE:PS50004};	At1g63220	GO:0005737,cytoplasm; GO:0046872,metal ion binding; GO:0003674,molecular_function; GO:0005488,binding; GO:0043167,ion binding; GO:0043169,cation binding; GO:0005575,cellular_component; GO:0005622,intracellular anatomical structure; GO:0110165,cellular anatomical entity	PF00168.30:C2 domain	--	--	--
TraesCS2B02G389100	TRUE	FALSE	FALSE	FALSE	8.95	5.91	3.36	6.07333	1.2	3.27	2.29	2.25333	2.36	9.67	5.99	6.00667	5.32	2.22	4.22	3.92	2B	552260576	552262910	-	TraesCS2B02G389100	--	K01803 triosephosphate isomerase (TIM) [EC:5.3.1.1] | (RefSeq) triosephosphate isomerase, cytosolic-like (A)	ko00010: Glycolysis / Gluconeogenesis; ko00051: Fructose and mannose metabolism; ko00562: Inositol phosphate metabolism; ko00710: Carbon fixation in photosynthetic organisms; ko01100: Metabolic pathways; ko01110: Biosynthesis of secondary metabolites; ko01200: Carbon metabolism; ko01230: Biosynthesis of amino acids	elicitor responsive gene 3 [Triticum aestivum]	ERG3_ORYSI RecName: Full=Elicitor-responsive protein 3; AltName: Full=16 kDa phloem protein; AltName: Full=RPP16;	A0A446MI94_TRITD RecName: Full=C2 domain-containing protein {ECO:0000259|PROSITE:PS50004};	At1g63220	GO:0005737,cytoplasm; GO:0046872,metal ion binding; GO:0003674,molecular_function; GO:0005488,binding; GO:0043167,ion binding; GO:0043169,cation binding; GO:0005575,cellular_component; GO:0005622,intracellular anatomical structure; GO:0110165,cellular anatomical entity	PF00168.30:C2 domain	--	--	--
TraesCS2B02G378300	TRUE	FALSE	FALSE	FALSE	4.42	4.15	3.4	3.99	9.1	9.25	7.64	8.66333	6.89	6.68	6.51	6.69333	8.92	8.11	6.78	7.93667	2B	541092268	541096969	+	TraesCS2B02G378300	--	K01681 aconitate hydratase [EC:4.2.1.3] | (RefSeq) putative aconitate hydratase, cytoplasmic (A)	ko00020: Citrate cycle (TCA cycle); ko00630: Glyoxylate and dicarboxylate metabolism; ko01100: Metabolic pathways; ko01110: Biosynthesis of secondary metabolites; ko01200: Carbon metabolism; ko01210: 2-Oxocarboxylic acid metabolism; ko01230: Biosynthesis of amino acids	uncharacterized protein LOC109782109 [Aegilops tauschii subsp. tauschii]	CPPM_ARATH RecName: Full=Carboxyvinyl-carboxyphosphonate phosphorylmutase, chloroplastic; EC=2.7.8.23; AltName: Full=Carboxyphosphonoenolpyruvate phosphonomutase; Short=CPEP phosphonomutase; Flags: Precursor;	A0A3B6C9A8_WHEAT SubName: Full=Uncharacterized protein {ECO:0000313|EnsemblPlants:TraesCS2B02G378300.1};	At2g43180	GO:0009507,chloroplast; GO:0009570,chloroplast stroma; GO:0008807,carboxyvinyl-carboxyphosphonate phosphorylmutase activity; GO:0003674,molecular_function; GO:0003824,catalytic activity; GO:0016740,transferase activity; GO:0016772,transferase activity, transferring phosphorus-containing groups; GO:0016780,phosphotransferase activity, for other substituted phosphate groups; GO:0005575,cellular_com…	PF13714.6:Phosphoenolpyruvate phosphomutase	--	--	--
TraesCS2B02G350500	TRUE	FALSE	FALSE	FALSE	18.5	18.56	21.82	19.6267	7.9	11.33	5.76	8.33	12.79	11.65	10.67	11.7033	9.87	7.88	10.62	9.45667	2B	497800259	497803768	-	TraesCS2B02G350500	ATP-dependent 6-phosphofructokinase [Source:UniProtKB/TrEMBL%3BAcc:A0A1D5U3B7]	K00850 6-phosphofructokinase 1 [EC:2.7.1.11] | (RefSeq) ATP-dependent 6-phosphofructokinase 2-like (A)	ko00010: Glycolysis / Gluconeogenesis; ko00030: Pentose phosphate pathway; ko00051: Fructose and mannose metabolism; ko00052: Galactose metabolism; ko01100: Metabolic pathways; ko01110: Biosynthesis of secondary metabolites; ko01200: Carbon metabolism; ko01230: Biosynthesis of amino acids; ko03018: RNA degradation	ATP-dependent 6-phosphofructokinase 2 [Aegilops tauschii subsp. tauschii]	PFKA2_ARATH RecName: Full=ATP-dependent 6-phosphofructokinase 2 {ECO:0000255|HAMAP-Rule:MF_03186}; Short=ATP-PFK 2 {ECO:0000255|HAMAP-Rule:MF_03186}; Short=Phosphofructokinase 2 {ECO:0000255|HAMAP-Rule:MF_03186}; EC=2.7.1.11 {ECO:0000255|HAMAP-Rule:MF_03186}; AltName: Full=Phosphohexokinase 2 {ECO:0000255|HAMAP-Rule:MF_03186};	A0A3B6C8B8_WHEAT RecName: Full=ATP-dependent 6-phosphofructokinase {ECO:0000256|HAMAP-Rule:MF_03186}; Short=ATP-PFK {ECO:0000256|HAMAP-Rule:MF_03186}; Short=Phosphofructokinase {ECO:0000256|HAMAP-Rule:MF_03186}; EC=2.7.1.11 {ECO:0000256|HAMAP-Rule:MF_03186}; AltName: Full=Phosphohexokinase {ECO:0000256|HAMAP-Rule:MF_03186};	At5g47810	GO:0005737,cytoplasm; GO:0005829,cytosol; GO:0003872,6-phosphofructokinase activity; GO:0005524,ATP binding; GO:0046872,metal ion binding; GO:0006002,fructose 6-phosphate metabolic process; GO:0006096,glycolytic process; GO:0003674,molecular_function; GO:0003824,catalytic activity; GO:0008443,phosphofructokinase activity; GO:0016301,kinase activity; GO:0016740,transferase activity; GO:0016772,tra…	PF00365.20:Phosphofructokinase	--	--	--
TraesCS2B02G308500	TRUE	FALSE	FALSE	FALSE	2.98	2.88	3.51	3.12333	7.1	12.6	5.75	8.48333	4.77	5.86	4.53	5.05333	7.73	10.77	9.4	9.3	2B	441792445	441794135	+	TraesCS2B02G308500	Arogenate dehydratase [Source:UniProtKB/TrEMBL%3BAcc:W5BE72]	K05359 arogenate/prephenate dehydratase [EC:4.2.1.91 4.2.1.51] | (RefSeq) arogenate dehydratase/prephenate dehydratase 6, chloroplastic-like (A)	ko00400: Phenylalanine, tyrosine and tryptophan biosynthesis; ko01100: Metabolic pathways; ko01110: Biosynthesis of secondary metabolites; ko01230: Biosynthesis of amino acids	Arogenate dehydratase/prephenate dehydratase 6, chloroplastic [Triticum urartu]	AROD6_ARATH RecName: Full=Arogenate dehydratase/prephenate dehydratase 6, chloroplastic; Short=AtADT6; Short=AtPDT6; EC=4.2.1.51; EC=4.2.1.91; Flags: Precursor;	A0A3B6C9B6_WHEAT RecName: Full=Arogenate dehydratase {ECO:0000256|ARBA:ARBA00013259, ECO:0000256|RuleBase:RU363004}; EC=4.2.1.91 {ECO:0000256|ARBA:ARBA00013259, ECO:0000256|RuleBase:RU363004};	At1g08250	GO:0009507,chloroplast; GO:0009570,chloroplast stroma; GO:0005737,cytoplasm; GO:0047769,arogenate dehydratase activity; GO:0004664,prephenate dehydratase activity; GO:0009094,L-phenylalanine biosynthetic process; GO:0003674,molecular_function; GO:0003824,catalytic activity; GO:0016829,lyase activity; GO:0016835,carbon-oxygen lyase activity; GO:0016836,hydro-lyase activity; GO:0006082,organic acid…	PF00800.18:Prephenate dehydratase	--	--	--
TraesCS2B02G127700	TRUE	FALSE	FALSE	FALSE	11.21	9.26	8.12	9.53	14.16	17.48	31.54	21.06	7.82	11.45	8.4	9.22333	15.12	12.17	13.63	13.64	2B	95759390	95768987	-	TraesCS2B02G127700	Probable acyl-CoA dehydrogenase IBR3 [Source:Projected from Arabidopsis thaliana (AT3G06810) UniProtKB/Swiss-Prot%3BAcc:Q8RWZ3]	K00249 acyl-CoA dehydrogenase [EC:1.3.8.7] | (RefSeq) probable acyl-CoA dehydrogenase IBR3 (A)	ko00071: Fatty acid degradation; ko00280: Valine, leucine and isoleucine degradation; ko01100: Metabolic pathways; ko01110: Biosynthesis of secondary metabolites; ko01212: Fatty acid metabolism	probable acyl-CoA dehydrogenase IBR3 [Aegilops tauschii subsp. tauschii]	IBR3_ARATH RecName: Full=Probable acyl-CoA dehydrogenase IBR3 {ECO:0000305}; EC=1.3.99.- {ECO:0000305}; AltName: Full=Protein INDOLE-3-BUTYRIC ACID RESPONSE 3 {ECO:0000303|PubMed:17277896};	A0A3B6C0C2_WHEAT SubName: Full=Uncharacterized protein {ECO:0000313|EnsemblPlants:TraesCS2B02G127700.1};	At3g06810	GO:0005777,peroxisome; GO:0050660,flavin adenine dinucleotide binding; GO:0016627,oxidoreductase activity, acting on the CH-CH group of donors; GO:0006631,fatty acid metabolic process; GO:0048767,root hair elongation; GO:0000166,nucleotide binding; GO:0003674,molecular_function; GO:0005488,binding; GO:0036094,small molecule binding; GO:0043167,ion binding; GO:0043168,anion binding; GO:0097159,org…	PF01636.23:Phosphotransferase enzyme family	--	--	--
TraesCS2B02G090100	TRUE	FALSE	FALSE	FALSE	15.67	17.09	16.26	16.34	5.37	8.86	8.87	7.7	13.94	10.9	8.88	11.24	8.42	12.86	5.52	8.93333	2B	51081162	51084863	+	TraesCS2B02G090100	--	K00615 transketolase [EC:2.2.1.1] | (RefSeq) transketolase, chloroplastic-like (A)	ko00030: Pentose phosphate pathway; ko00710: Carbon fixation in photosynthetic organisms; ko01100: Metabolic pathways; ko01110: Biosynthesis of secondary metabolites; ko01200: Carbon metabolism; ko01230: Biosynthesis of amino acids	transketolase, chloroplastic-like [Aegilops tauschii subsp. tauschii]	TKTC_MAIZE RecName: Full=Transketolase, chloroplastic; Short=TK; EC=2.2.1.1;	A0A3B6BZB5_WHEAT RecName: Full=Transketolase {ECO:0000256|ARBA:ARBA00013152}; EC=2.2.1.1 {ECO:0000256|ARBA:ARBA00013152};	At2g45290	GO:0009535,chloroplast thylakoid membrane; GO:0005829,cytosol; GO:0005509,calcium ion binding; GO:0050897,cobalt ion binding; GO:0030145,manganese ion binding; GO:0004802,transketolase activity; GO:0006098,pentose-phosphate shunt; GO:0019253,reductive pentose-phosphate cycle; GO:0003674,molecular_function; GO:0005488,binding; GO:0043167,ion binding; GO:0043169,cation binding; GO:0046872,metal ion…	PF00456.21:Transketolase, thiamine diphosphate binding domain	--	--	--
TraesCS2B02G002100	TRUE	FALSE	FALSE	FALSE	16.13	16.18	17.19	16.5	40.46	43.98	35.23	39.89	15.9	11.87	19.59	15.7867	27	33.81	26.26	29.0233	2B	1348871	1362213	+	TraesCS2B02G002100	--	K00611 ornithine carbamoyltransferase [EC:2.1.3.3] | (RefSeq) ornithine carbamoyltransferase, chloroplastic-like isoform X1 (A)	ko00220: Arginine biosynthesis; ko01100: Metabolic pathways; ko01110: Biosynthesis of secondary metabolites; ko01230: Biosynthesis of amino acids	CBS domain-containing protein CBSX1, chloroplastic-like [Aegilops tauschii subsp. tauschii]	--	A0A453A8N8_AEGTS SubName: Full=Uncharacterized protein {ECO:0000313|EnsemblPlants:AET2Gv20029900.4};	--	--	PF00571.28:CBS domain	--	--	--
TraesCS2A02G593000	TRUE	TRUE	FALSE	FALSE	10.41	11.62	13.06	11.6967	6.26	6.65	2.09	5	12.49	40.28	17.47	23.4133	3.97	6.25	8.19	6.13667	2A	779818180	779822579	-	TraesCS2A02G593000	Pyruvate kinase [Source:UniProtKB/TrEMBL%3BAcc:A0A1D5TB86]	K00873 pyruvate kinase [EC:2.7.1.40] | (RefSeq) pyruvate kinase, cytosolic isozyme-like (A)	ko00010: Glycolysis / Gluconeogenesis; ko00620: Pyruvate metabolism; ko01100: Metabolic pathways; ko01110: Biosynthesis of secondary metabolites; ko01200: Carbon metabolism; ko01230: Biosynthesis of amino acids	pyruvate kinase, cytosolic isozyme-like [Aegilops tauschii subsp. tauschii]	KPYC_SOLTU RecName: Full=Pyruvate kinase, cytosolic isozyme; Short=PK; EC=2.7.1.40;	A0A446LMR0_TRITD RecName: Full=Pyruvate kinase {ECO:0000256|ARBA:ARBA00012142, ECO:0000256|RuleBase:RU000504}; EC=2.7.1.40 {ECO:0000256|ARBA:ARBA00012142, ECO:0000256|RuleBase:RU000504};	At5g08570	GO:0005737,cytoplasm; GO:0005524,ATP binding; GO:0016301,kinase activity; GO:0000287,magnesium ion binding; GO:0030955,potassium ion binding; GO:0004743,pyruvate kinase activity; GO:0006096,glycolytic process; GO:0000166,nucleotide binding; GO:0003674,molecular_function; GO:0005488,binding; GO:0017076,purine nucleotide binding; GO:0030554,adenyl nucleotide binding; GO:0032553,ribonucleotide bindi…	PF00224.21:Pyruvate kinase, barrel domain	--	--	--
TraesCS2A02G415800	TRUE	TRUE	FALSE	FALSE	3.69	3.76	3.33	3.59333	0.67	0.75	0.55	0.656667	2.82	1.67	2.04	2.17667	0.37	0.4	0.56	0.443333	2A	672367556	672370415	+	TraesCS2A02G415800	--	K01620 threonine aldolase [EC:4.1.2.48] | (RefSeq) probable low-specificity L-threonine aldolase 1 (A)	ko00260: Glycine, serine and threonine metabolism; ko01100: Metabolic pathways; ko01110: Biosynthesis of secondary metabolites; ko01230: Biosynthesis of amino acids	probable low-specificity L-threonine aldolase 1 [Aegilops tauschii subsp. tauschii]	THA1_ARATH RecName: Full=Probable low-specificity L-threonine aldolase 1; EC=4.1.2.48; AltName: Full=Threonine aldolase 1;	A0A446LD33_TRITD RecName: Full=Beta_elim_lyase domain-containing protein {ECO:0000259|Pfam:PF01212};	At1g08630	GO:0005829,cytosol; GO:0008732,L-allo-threonine aldolase activity; GO:0004793,threonine aldolase activity; GO:0006545,glycine biosynthetic process; GO:0006567,threonine catabolic process; GO:0003674,molecular_function; GO:0003824,catalytic activity; GO:0016829,lyase activity; GO:0016830,carbon-carbon lyase activity; GO:0016832,aldehyde-lyase activity; GO:0006082,organic acid metabolic process; GO…	PF01212.21:Beta-eliminating lyase	--	--	--
TraesCS2A02G398000	TRUE	TRUE	FALSE	FALSE	0	0	0.02	0.00666667	0.4	0.71	0.9	0.67	0	0	0.1	0.0333333	0.57	0.58	0.41	0.52	2A	651607525	651610227	-	TraesCS2A02G398000	SLAC1 [Source:Projected from Arabidopsis thaliana (AT1G12480) UniProtKB/TrEMBL%3BAcc:A0A178WLC1]	K01714 4-hydroxy-tetrahydrodipicolinate synthase [EC:4.3.3.7] | (RefSeq) 4-hydroxy-tetrahydrodipicolinate synthase 2, chloroplastic-like (A)	ko00261: Monobactam biosynthesis; ko00300: Lysine biosynthesis; ko01100: Metabolic pathways; ko01110: Biosynthesis of secondary metabolites; ko01230: Biosynthesis of amino acids	guard cell S-type anion channel SLAC1 [Aegilops tauschii subsp. tauschii]	SLAC1_ARATH RecName: Full=Guard cell S-type anion channel SLAC1 {ECO:0000305}; AltName: Full=Protein CARBON DIOXIDE INSENSITIVE 3 {ECO:0000305}; AltName: Full=Protein OZONE-SENSITIVE 1 {ECO:0000303|PubMed:18084014}; AltName: Full=Protein RADICAL-INDUCED CELL DEATH 3 {ECO:0000303|Ref.4}; AltName: Full=Protein SLOW ANION CHANNEL-ASSOCIATED 1 {ECO:0000303|PubMed:18305482};	A0A3B6B3I8_WHEAT SubName: Full=Uncharacterized protein {ECO:0000313|EnsemblPlants:TraesCS2A02G398000.1};	At1g12480	GO:0016021,integral component of membrane; GO:0005886,plasma membrane; GO:0008509,anion transmembrane transporter activity; GO:0019901,protein kinase binding; GO:0019903,protein phosphatase binding; GO:0008308,voltage-gated anion channel activity; GO:0009738,abscisic acid-activated signaling pathway; GO:0006820,anion transport; GO:0006873,cellular ion homeostasis; GO:0015698,inorganic anion trans…	PF03595.17:Voltage-dependent anion channel	--	--	--
TraesCS2A02G397900	TRUE	FALSE	FALSE	FALSE	2.03	1.51	1.44	1.66	0.68	1.17	0.61	0.82	2.02	3.27	1.44	2.24333	0.69	0.79	1.39	0.956667	2A	651604876	651608169	+	TraesCS2A02G397900	--	K01714 4-hydroxy-tetrahydrodipicolinate synthase [EC:4.3.3.7] | (RefSeq) 4-hydroxy-tetrahydrodipicolinate synthase 2, chloroplastic-like (A)	ko00261: Monobactam biosynthesis; ko00300: Lysine biosynthesis; ko01100: Metabolic pathways; ko01110: Biosynthesis of secondary metabolites; ko01230: Biosynthesis of amino acids	4-hydroxy-tetrahydrodipicolinate synthase 2, chloroplastic [Aegilops tauschii subsp. tauschii]	DAPA2_WHEAT RecName: Full=4-hydroxy-tetrahydrodipicolinate synthase 2, chloroplastic; Short=HTPA synthase 2; EC=4.3.3.7; Flags: Precursor;	A0A446LBN7_TRITD RecName: Full=4-hydroxy-tetrahydrodipicolinate synthase {ECO:0000256|ARBA:ARBA00012086}; EC=4.3.3.7 {ECO:0000256|ARBA:ARBA00012086};	At2g45440	GO:0009507,chloroplast; GO:0008840,4-hydroxy-tetrahydrodipicolinate synthase activity; GO:0019877,diaminopimelate biosynthetic process; GO:0009089,lysine biosynthetic process via diaminopimelate; GO:0003674,molecular_function; GO:0003824,catalytic activity; GO:0016829,lyase activity; GO:0016835,carbon-oxygen lyase activity; GO:0016836,hydro-lyase activity; GO:0006082,organic acid metabolic proces…	PF00701.22:Dihydrodipicolinate synthetase family	--	--	--
TraesCS2A02G382700	TRUE	TRUE	TRUE	FALSE	9.34	8.07	7.63	8.34667	1.5	1.15	1.69	1.44667	4.52	2.39	4.72	3.87667	0.86	0.75	1.32	0.976667	2A	627511053	627514324	-	TraesCS2A02G382700	--	K01620 threonine aldolase [EC:4.1.2.48] | (RefSeq) probable low-specificity L-threonine aldolase 1 (A)	ko00260: Glycine, serine and threonine metabolism; ko01100: Metabolic pathways; ko01110: Biosynthesis of secondary metabolites; ko01230: Biosynthesis of amino acids	probable low-specificity L-threonine aldolase 1 [Aegilops tauschii subsp. tauschii]	THA1_ARATH RecName: Full=Probable low-specificity L-threonine aldolase 1; EC=4.1.2.48; AltName: Full=Threonine aldolase 1;	A0A446LAH5_TRITD RecName: Full=Beta_elim_lyase domain-containing protein {ECO:0000259|Pfam:PF01212};	At1g08630	GO:0005829,cytosol; GO:0008732,L-allo-threonine aldolase activity; GO:0004793,threonine aldolase activity; GO:0006545,glycine biosynthetic process; GO:0006567,threonine catabolic process; GO:0003674,molecular_function; GO:0003824,catalytic activity; GO:0016829,lyase activity; GO:0016830,carbon-carbon lyase activity; GO:0016832,aldehyde-lyase activity; GO:0006082,organic acid metabolic process; GO…	PF01212.21:Beta-eliminating lyase	--	--	--
TraesCS2A02G377000	TRUE	FALSE	TRUE	FALSE	3.29	1.73	1.63	2.21667	0.54	0.9	0.95	0.796667	0.54	1.39	1.03	0.986667	0.08	1.27	1.05	0.8	2A	619613327	619617459	+	TraesCS2A02G377000	Patatin [Source:UniProtKB/TrEMBL%3BAcc:A0A1D5TAQ2]	K00850 6-phosphofructokinase 1 [EC:2.7.1.11] | (RefSeq) uncharacterized protein LOC116257630 (A)	ko00010: Glycolysis / Gluconeogenesis; ko00030: Pentose phosphate pathway; ko00051: Fructose and mannose metabolism; ko00052: Galactose metabolism; ko01100: Metabolic pathways; ko01110: Biosynthesis of secondary metabolites; ko01200: Carbon metabolism; ko01230: Biosynthesis of amino acids; ko03018: RNA degradation	predicted protein [Hordeum vulgare subsp. vulgare]	--	A0A3B6B1H0_WHEAT RecName: Full=Patatin {ECO:0000256|RuleBase:RU361262}; EC=3.1.1.- {ECO:0000256|RuleBase:RU361262};	At1g33270	GO:0047617,acyl-CoA hydrolase activity; GO:0016042,lipid catabolic process; GO:0003674,molecular_function; GO:0003824,catalytic activity; GO:0016289,CoA hydrolase activity; GO:0016787,hydrolase activity; GO:0016788,hydrolase activity, acting on ester bonds; GO:0016790,thiolester hydrolase activity; GO:0006629,lipid metabolic process; GO:0008150,biological_process; GO:0008152,metabolic process; GO…	PF01734.22:Patatin-like phospholipase	--	--	--
TraesCS2A02G372000	TRUE	TRUE	FALSE	FALSE	31.52	27.04	20.45	26.3367	4.42	5.15	3.26	4.27667	11.48	33.36	24.82	23.22	7.38	3.77	10.05	7.06667	2A	614392396	614395704	-	TraesCS2A02G372000	Elicitor responsive gene 3 [Source:UniProtKB/TrEMBL%3BAcc:D3JCC7]	K01803 triosephosphate isomerase (TIM) [EC:5.3.1.1] | (RefSeq) triosephosphate isomerase, cytosolic-like (A)	ko00010: Glycolysis / Gluconeogenesis; ko00051: Fructose and mannose metabolism; ko00562: Inositol phosphate metabolism; ko00710: Carbon fixation in photosynthetic organisms; ko01100: Metabolic pathways; ko01110: Biosynthesis of secondary metabolites; ko01200: Carbon metabolism; ko01230: Biosynthesis of amino acids	elicitor responsive gene 3 [Triticum aestivum]	ERG3_ORYSI RecName: Full=Elicitor-responsive protein 3; AltName: Full=16 kDa phloem protein; AltName: Full=RPP16;	D3JCC7_WHEAT SubName: Full=Elicitor responsive gene 3 {ECO:0000313|EMBL:ADC34699.1, ECO:0000313|EnsemblPlants:TraesCS2A02G372000.1};	At1g63220	GO:0005737,cytoplasm; GO:0046872,metal ion binding; GO:0003674,molecular_function; GO:0005488,binding; GO:0043167,ion binding; GO:0043169,cation binding; GO:0005575,cellular_component; GO:0005622,intracellular anatomical structure; GO:0110165,cellular anatomical entity	PF00168.30:C2 domain	--	--	--
TraesCS2A02G331700	TRUE	FALSE	FALSE	FALSE	8.64	9.84	10.42	9.63333	2.54	3.31	1.72	2.52333	8.12	8.5	6.74	7.78667	5.86	4.22	6.08	5.38667	2A	564611917	564615446	+	TraesCS2A02G331700	ATP-dependent 6-phosphofructokinase [Source:UniProtKB/TrEMBL%3BAcc:W5ARV3]	K00850 6-phosphofructokinase 1 [EC:2.7.1.11] | (RefSeq) ATP-dependent 6-phosphofructokinase 2-like (A)	ko00010: Glycolysis / Gluconeogenesis; ko00030: Pentose phosphate pathway; ko00051: Fructose and mannose metabolism; ko00052: Galactose metabolism; ko01100: Metabolic pathways; ko01110: Biosynthesis of secondary metabolites; ko01200: Carbon metabolism; ko01230: Biosynthesis of amino acids; ko03018: RNA degradation	ATP-dependent 6-phosphofructokinase 2 [Aegilops tauschii subsp. tauschii]	PFKA2_ARATH RecName: Full=ATP-dependent 6-phosphofructokinase 2 {ECO:0000255|HAMAP-Rule:MF_03186}; Short=ATP-PFK 2 {ECO:0000255|HAMAP-Rule:MF_03186}; Short=Phosphofructokinase 2 {ECO:0000255|HAMAP-Rule:MF_03186}; EC=2.7.1.11 {ECO:0000255|HAMAP-Rule:MF_03186}; AltName: Full=Phosphohexokinase 2 {ECO:0000255|HAMAP-Rule:MF_03186};	A0A3B6B181_WHEAT RecName: Full=ATP-dependent 6-phosphofructokinase {ECO:0000256|HAMAP-Rule:MF_03186}; Short=ATP-PFK {ECO:0000256|HAMAP-Rule:MF_03186}; Short=Phosphofructokinase {ECO:0000256|HAMAP-Rule:MF_03186}; EC=2.7.1.11 {ECO:0000256|HAMAP-Rule:MF_03186}; AltName: Full=Phosphohexokinase {ECO:0000256|HAMAP-Rule:MF_03186};	At5g47810	GO:0005737,cytoplasm; GO:0005829,cytosol; GO:0003872,6-phosphofructokinase activity; GO:0005524,ATP binding; GO:0046872,metal ion binding; GO:0006002,fructose 6-phosphate metabolic process; GO:0006096,glycolytic process; GO:0003674,molecular_function; GO:0003824,catalytic activity; GO:0008443,phosphofructokinase activity; GO:0016301,kinase activity; GO:0016740,transferase activity; GO:0016772,tra…	PF00365.20:Phosphofructokinase	--	--	--
TraesCS2A02G109700	TRUE	FALSE	FALSE	FALSE	7.64	7.7	7.15	7.49667	18.18	18.09	30.34	22.2033	9.43	14.2	9.88	11.17	18.03	15.92	20.2	18.05	2A	61468771	61480065	-	TraesCS2A02G109700	Probable acyl-CoA dehydrogenase IBR3 [Source:Projected from Arabidopsis thaliana (AT3G06810) UniProtKB/Swiss-Prot%3BAcc:Q8RWZ3]	K00249 acyl-CoA dehydrogenase [EC:1.3.8.7] | (RefSeq) probable acyl-CoA dehydrogenase IBR3 (A)	ko00071: Fatty acid degradation; ko00280: Valine, leucine and isoleucine degradation; ko01100: Metabolic pathways; ko01110: Biosynthesis of secondary metabolites; ko01212: Fatty acid metabolism	probable acyl-CoA dehydrogenase IBR3 [Aegilops tauschii subsp. tauschii]	IBR3_ARATH RecName: Full=Probable acyl-CoA dehydrogenase IBR3 {ECO:0000305}; EC=1.3.99.- {ECO:0000305}; AltName: Full=Protein INDOLE-3-BUTYRIC ACID RESPONSE 3 {ECO:0000303|PubMed:17277896};	A0A3B6ARW8_WHEAT SubName: Full=Uncharacterized protein {ECO:0000313|EnsemblPlants:TraesCS2A02G109700.1};	At3g06810	GO:0005777,peroxisome; GO:0050660,flavin adenine dinucleotide binding; GO:0016627,oxidoreductase activity, acting on the CH-CH group of donors; GO:0006631,fatty acid metabolic process; GO:0048767,root hair elongation; GO:0000166,nucleotide binding; GO:0003674,molecular_function; GO:0005488,binding; GO:0036094,small molecule binding; GO:0043167,ion binding; GO:0043168,anion binding; GO:0097159,org…	PF01636.23:Phosphotransferase enzyme family	--	--	--
TraesCS2A02G035700	TRUE	FALSE	FALSE	TRUE	3.33	3.51	3.63	3.49	15.16	14.46	15.4	15.0067	1.76	1.53	3.89	2.39333	5.39	5.5	4.49	5.12667	2A	15451031	15454016	-	TraesCS2A02G035700	--	K01476 arginase [EC:3.5.3.1] | (RefSeq) arginase 1, mitochondrial (A)	ko00220: Arginine biosynthesis; ko00330: Arginine and proline metabolism; ko01100: Metabolic pathways; ko01110: Biosynthesis of secondary metabolites; ko01230: Biosynthesis of amino acids	arginase 1, mitochondrial [Aegilops tauschii subsp. tauschii]	ARGI1_ORYSI RecName: Full=Arginase 1, mitochondrial; EC=3.5.3.1 {ECO:0000250|UniProtKB:P05089}; AltName: Full=Arginine amidohydrolase 1; Flags: Precursor;	A0A3B6AQG3_WHEAT SubName: Full=Uncharacterized protein {ECO:0000313|EnsemblPlants:TraesCS2A02G035700.1};	At4g08900	GO:0005739,mitochondrion; GO:0004053,arginase activity; GO:0030145,manganese ion binding; GO:0006527,arginine catabolic process; GO:0000050,urea cycle; GO:0003674,molecular_function; GO:0003824,catalytic activity; GO:0016787,hydrolase activity; GO:0016810,hydrolase activity, acting on carbon-nitrogen (but not peptide) bonds; GO:0016813,hydrolase activity, acting on carbon-nitrogen (but not peptid…	PF00491.21:Arginase family	--	--	--
TraesCS2A02G028900	TRUE	FALSE	FALSE	TRUE	0.27	0.35	0.21	0.276667	0.69	0.82	1.66	1.05667	0.04	0	0.01	0.0166667	0	0.03	0.02	0.0166667	2A	13030465	13036991	+	TraesCS2A02G028900	--	K13034 L-3-cyanoalanine synthase/ cysteine synthase [EC:2.5.1.47 4.4.1.9] | (RefSeq) bifunctional L-3-cyanoalanine synthase/cysteine synthase, mitochondrial-like isoform X1 (A)	ko00270: Cysteine and methionine metabolism; ko00460: Cyanoamino acid metabolism; ko00920: Sulfur metabolism; ko01100: Metabolic pathways; ko01110: Biosynthesis of secondary metabolites; ko01200: Carbon metabolism; ko01230: Biosynthesis of amino acids	hypothetical protein TRIUR3_03726 [Triticum urartu]	PAIR1_ORYSJ RecName: Full=Protein PAIR1; AltName: Full=Protein HOMOLOGOUS PAIRING ABERRATION IN RICE MEIOSIS 1;	A0A3B6APE2_WHEAT SubName: Full=Uncharacterized protein {ECO:0000313|EnsemblPlants:TraesCS2A02G028900.1};	At1g01690	GO:0005634,nucleus; GO:0070192,chromosome organization involved in meiotic cell cycle; GO:0009553,embryo sac development; GO:0009554,megasporogenesis; GO:0042138,meiotic DNA double-strand break formation; GO:0009556,microsporogenesis; GO:0000003,reproduction; GO:0006996,organelle organization; GO:0007049,cell cycle; GO:0008150,biological_process; GO:0009987,cellular process; GO:0016043,cellular c…	PF10807.8:Protein of unknown function (DUF2541)	--	--	--
TraesCS2A02G014300	TRUE	FALSE	FALSE	FALSE	11.4	7.16	6.73	8.43	4.4	4.22	1.12	3.24667	12.26	7.79	7.66	9.23667	3.64	6.34	4.96	4.98	2A	5689525	5692873	-	TraesCS2A02G014300	--	K00611 ornithine carbamoyltransferase [EC:2.1.3.3] | (RefSeq) ornithine carbamoyltransferase, chloroplastic-like isoform X1 (A)	ko00220: Arginine biosynthesis; ko01100: Metabolic pathways; ko01110: Biosynthesis of secondary metabolites; ko01230: Biosynthesis of amino acids	CBS domain-containing protein CBSX1, chloroplastic-like [Aegilops tauschii subsp. tauschii]	--	A0A3B6APF8_WHEAT SubName: Full=Uncharacterized protein {ECO:0000313|EnsemblPlants:TraesCS2A02G014300.1};	--	--	PF00571.28:CBS domain	--	--	--
TraesCS1D02G280700	TRUE	TRUE	FALSE	FALSE	11.37	7.09	6.33	8.26333	2.76	2.21	3.13	2.7	9	13.57	7.24	9.93667	2.45	5.43	4.15	4.01	1D	379137395	379145818	-	TraesCS1D02G280700	Delta-1-pyrroline-5-carboxylate synthase [Source:UniProtKB/TrEMBL%3BAcc:W5ACM8]	K12657 delta-1-pyrroline-5-carboxylate synthetase [EC:2.7.2.11 1.2.1.41] | (RefSeq) delta-1-pyrroline-5-carboxylate synthase 1-like (A)	ko00330: Arginine and proline metabolism; ko01100: Metabolic pathways; ko01110: Biosynthesis of secondary metabolites; ko01230: Biosynthesis of amino acids	delta1-pyrroline-5-carboxylate synthetase [Triticum aestivum]	P5CS1_ORYSJ RecName: Full=Delta-1-pyrroline-5-carboxylate synthase 1 {ECO:0000305}; Short=OsP5CS1 {ECO:0000303|Ref.8}; Includes: RecName: Full=Glutamate 5-kinase; Short=GK; EC=2.7.2.11; AltName: Full=Gamma-glutamyl kinase; Includes: RecName: Full=Gamma-glutamyl phosphate reductase; Short=GPR; EC=1.2.1.41; AltName: Full=Glutamate-5-semialdehyde dehydrogenase; AltName: Full=Glutamyl-gamma-semialdeh…	W5ACM8_WHEAT RecName: Full=Delta-1-pyrroline-5-carboxylate synthase {ECO:0000256|PIRNR:PIRNR036429}; Includes: RecName: Full=Glutamate 5-kinase {ECO:0000256|PIRNR:PIRNR036429}; Short=GK {ECO:0000256|PIRNR:PIRNR036429}; EC=2.7.2.11 {ECO:0000256|PIRNR:PIRNR036429}; AltName: Full=Gamma-glutamyl kinase {ECO:0000256|PIRNR:PIRNR036429}; Includes: RecName: Full=Gamma-glutamyl phosphate reductase {ECO:00…	At2g39800_2	GO:0005737,cytoplasm; GO:0005524,ATP binding; GO:0004349,glutamate 5-kinase activity; GO:0004350,glutamate-5-semialdehyde dehydrogenase activity; GO:0055129,L-proline biosynthetic process; GO:0006561,proline biosynthetic process; GO:0000166,nucleotide binding; GO:0003674,molecular_function; GO:0005488,binding; GO:0017076,purine nucleotide binding; GO:0030554,adenyl nucleotide binding; GO:0032553,…	PF00696.28:Amino acid kinase family	--	--	--
TraesCS1D02G222300	TRUE	FALSE	FALSE	FALSE	21.38	14.99	17.25	17.8733	43.27	41.67	32.03	38.99	31.3	29.66	34.24	31.7333	44.03	51.29	42.77	46.03	1D	309976583	309981167	-	TraesCS1D02G222300	--	K13832 3-dehydroquinate dehydratase / shikimate dehydrogenase [EC:4.2.1.10 1.1.1.25] | (RefSeq) bifunctional 3-dehydroquinate dehydratase/shikimate dehydrogenase, chloroplastic-like (A)	ko00400: Phenylalanine, tyrosine and tryptophan biosynthesis; ko00999: Biosynthesis of various plant secondary metabolites; ko01100: Metabolic pathways; ko01110: Biosynthesis of secondary metabolites; ko01230: Biosynthesis of amino acids	uncharacterized protein LOC109741640 [Aegilops tauschii subsp. tauschii]	--	A0A452YW55_AEGTS SubName: Full=Uncharacterized protein {ECO:0000313|EnsemblPlants:AET1Gv20551800.3};	At3g22450	GO:0005840,ribosome; GO:0003735,structural constituent of ribosome; GO:0006412,translation; GO:0003674,molecular_function; GO:0005198,structural molecule activity; GO:0006518,peptide metabolic process; GO:0006807,nitrogen compound metabolic process; GO:0008150,biological_process; GO:0008152,metabolic process; GO:0009058,biosynthetic process; GO:0009059,macromolecule biosynthetic process; GO:00099…	PF00861.22:Ribosomal L18 of archaea, bacteria, mitoch. and chloroplast	--	--	--
TraesCS1D02G188500	TRUE	TRUE	TRUE	FALSE	2.8	1.98	2.69	2.49	0.13	0.07	0.45	0.216667	1.07	1.56	1.32	1.31667	0.26	0.08	0.15	0.163333	1D	260978170	260979393	-	TraesCS1D02G188500	--	K05359 arogenate/prephenate dehydratase [EC:4.2.1.91 4.2.1.51] | (RefSeq) arogenate dehydratase 3, chloroplastic-like (A)	ko00400: Phenylalanine, tyrosine and tryptophan biosynthesis; ko01100: Metabolic pathways; ko01110: Biosynthesis of secondary metabolites; ko01230: Biosynthesis of amino acids	arogenate dehydratase 3, chloroplastic-like [Aegilops tauschii subsp. tauschii]	AROD1_PETHY RecName: Full=Arogenate dehydratase 1 {ECO:0000303|PubMed:20215586}; Short=PhADT1 {ECO:0000303|PubMed:20215586}; EC=4.2.1.91 {ECO:0000269|PubMed:20215586}; Flags: Precursor;	A0A3B5ZV47_WHEAT RecName: Full=Prephenate dehydratase domain-containing protein {ECO:0000259|PROSITE:PS51171};	At1g08250	GO:0009507,chloroplast; GO:0009570,chloroplast stroma; GO:0047769,arogenate dehydratase activity; GO:0007623,circadian rhythm; GO:0009094,L-phenylalanine biosynthetic process; GO:0003674,molecular_function; GO:0003824,catalytic activity; GO:0016829,lyase activity; GO:0016835,carbon-oxygen lyase activity; GO:0016836,hydro-lyase activity; GO:0008150,biological_process; GO:0048511,rhythmic process; …	PF00800.18:Prephenate dehydratase	--	--	--
TraesCS1D02G062800	TRUE	TRUE	FALSE	FALSE	7.97	9.15	10.67	9.26333	17.86	23.41	20.24	20.5033	10.82	7.81	12.63	10.42	22.47	16.52	24.69	21.2267	1D	42759488	42764120	+	TraesCS1D02G062800	Glycosyltransferase [Source:UniProtKB/TrEMBL%3BAcc:A0A341PF23]	K00927 phosphoglycerate kinase [EC:2.7.2.3] | (RefSeq) uncharacterized LOC109182250 (A)	ko00010: Glycolysis / Gluconeogenesis; ko00710: Carbon fixation in photosynthetic organisms; ko01100: Metabolic pathways; ko01110: Biosynthesis of secondary metabolites; ko01200: Carbon metabolism; ko01230: Biosynthesis of amino acids	UDP-glycosyltransferase 86A1 isoform X1 [Aegilops tauschii subsp. tauschii]	U86A1_ARATH RecName: Full=UDP-glycosyltransferase 86A1; EC=2.4.1.-;	A0A3B5ZNY9_WHEAT RecName: Full=Glycosyltransferase {ECO:0000256|RuleBase:RU362057}; EC=2.4.1.- {ECO:0000256|RuleBase:RU362057};	At2g36970	GO:0008194,UDP-glycosyltransferase activity; GO:0003674,molecular_function; GO:0003824,catalytic activity; GO:0016740,transferase activity; GO:0016757,transferase activity, transferring glycosyl groups	PF00201.18:UDP-glucoronosyl and UDP-glucosyl transferase	--	--	--
TraesCS1B02G290600	TRUE	FALSE	FALSE	FALSE	8.03	5.63	6.46	6.70667	2.17	2.5	3.15	2.60667	5.51	6.78	5.42	5.90333	2.35	4.41	2.82	3.19333	1B	507847765	507856017	-	TraesCS1B02G290600	Delta-1-pyrroline-5-carboxylate synthase [Source:UniProtKB/TrEMBL%3BAcc:Q58QF6]	K12657 delta-1-pyrroline-5-carboxylate synthetase [EC:2.7.2.11 1.2.1.41] | (RefSeq) delta-1-pyrroline-5-carboxylate synthase 1-like (A)	ko00330: Arginine and proline metabolism; ko01100: Metabolic pathways; ko01110: Biosynthesis of secondary metabolites; ko01230: Biosynthesis of amino acids	delta 1-pyrroline-5-carboxylate synthetase [Triticum aestivum]	P5CS1_ORYSJ RecName: Full=Delta-1-pyrroline-5-carboxylate synthase 1 {ECO:0000305}; Short=OsP5CS1 {ECO:0000303|Ref.8}; Includes: RecName: Full=Glutamate 5-kinase; Short=GK; EC=2.7.2.11; AltName: Full=Gamma-glutamyl kinase; Includes: RecName: Full=Gamma-glutamyl phosphate reductase; Short=GPR; EC=1.2.1.41; AltName: Full=Glutamate-5-semialdehyde dehydrogenase; AltName: Full=Glutamyl-gamma-semialdeh…	Q58QF6_WHEAT RecName: Full=Delta-1-pyrroline-5-carboxylate synthase {ECO:0000256|PIRNR:PIRNR036429}; Includes: RecName: Full=Glutamate 5-kinase {ECO:0000256|PIRNR:PIRNR036429}; Short=GK {ECO:0000256|PIRNR:PIRNR036429}; EC=2.7.2.11 {ECO:0000256|PIRNR:PIRNR036429}; AltName: Full=Gamma-glutamyl kinase {ECO:0000256|PIRNR:PIRNR036429}; Includes: RecName: Full=Gamma-glutamyl phosphate reductase {ECO:00…	At2g39800_2	GO:0005737,cytoplasm; GO:0005524,ATP binding; GO:0004349,glutamate 5-kinase activity; GO:0004350,glutamate-5-semialdehyde dehydrogenase activity; GO:0055129,L-proline biosynthetic process; GO:0006561,proline biosynthetic process; GO:0000166,nucleotide binding; GO:0003674,molecular_function; GO:0005488,binding; GO:0017076,purine nucleotide binding; GO:0030554,adenyl nucleotide binding; GO:0032553,…	PF00696.28:Amino acid kinase family	--	--	--
TraesCS1B02G195800	TRUE	FALSE	FALSE	FALSE	1.16	1.91	2.36	1.81	0.39	0.56	0.94	0.63	1.51	1.04	1.26	1.27	0.92	0.31	0.76	0.663333	1B	351439663	351441438	+	TraesCS1B02G195800	--	K05359 arogenate/prephenate dehydratase [EC:4.2.1.91 4.2.1.51] | (RefSeq) arogenate dehydratase/prephenate dehydratase 6, chloroplastic-like (A)	ko00400: Phenylalanine, tyrosine and tryptophan biosynthesis; ko01100: Metabolic pathways; ko01110: Biosynthesis of secondary metabolites; ko01230: Biosynthesis of amino acids	arogenate dehydratase 3, chloroplastic-like [Aegilops tauschii subsp. tauschii]	AROD1_PETHY RecName: Full=Arogenate dehydratase 1 {ECO:0000303|PubMed:20215586}; Short=PhADT1 {ECO:0000303|PubMed:20215586}; EC=4.2.1.91 {ECO:0000269|PubMed:20215586}; Flags: Precursor;	A0A446JVF8_TRITD RecName: Full=Prephenate dehydratase domain-containing protein {ECO:0000259|PROSITE:PS51171};	At1g08250	GO:0009507,chloroplast; GO:0009570,chloroplast stroma; GO:0047769,arogenate dehydratase activity; GO:0007623,circadian rhythm; GO:0009094,L-phenylalanine biosynthetic process; GO:0003674,molecular_function; GO:0003824,catalytic activity; GO:0016829,lyase activity; GO:0016835,carbon-oxygen lyase activity; GO:0016836,hydro-lyase activity; GO:0008150,biological_process; GO:0048511,rhythmic process; …	PF00800.18:Prephenate dehydratase	--	--	--
TraesCS1B02G124900	TRUE	FALSE	FALSE	FALSE	4.04	3.4	2.82	3.42	7.33	9.04	8.71	8.36	3.64	6.43	4.56	4.87667	7.75	10.36	6.82	8.31	1B	151467835	151473827	-	TraesCS1B02G124900	Dihydrolipoyl dehydrogenase [Source:UniProtKB/TrEMBL%3BAcc:A0A341P9S9]	K00382 dihydrolipoamide dehydrogenase [EC:1.8.1.4] | (RefSeq) dihydrolipoyl dehydrogenase 1, chloroplastic-like (A)	ko00010: Glycolysis / Gluconeogenesis; ko00020: Citrate cycle (TCA cycle); ko00260: Glycine, serine and threonine metabolism; ko00280: Valine, leucine and isoleucine degradation; ko00310: Lysine degradation; ko00380: Tryptophan metabolism; ko00620: Pyruvate metabolism; ko00630: Glyoxylate and dicarboxylate metabolism; ko00640: Propanoate metabolism; ko01100: Metabolic pathways; ko01110: Biosynthe…	dihydrolipoyl dehydrogenase 2, chloroplastic-like [Aegilops tauschii subsp. tauschii]	PLPD1_ARATH RecName: Full=Dihydrolipoyl dehydrogenase 1, chloroplastic; Short=ptLPD1; EC=1.8.1.4; AltName: Full=Dihydrolipoamide dehydrogenase 1; AltName: Full=Protein LIPOAMIDE DEHYDROGENASE 1; AltName: Full=Pyruvate dehydrogenase complex E3 subunit 1; Short=E3-1; Short=PDC-E3 1; Flags: Precursor;	A0A3B5YUT9_WHEAT RecName: Full=Dihydrolipoyl dehydrogenase {ECO:0000256|RuleBase:RU003692}; EC=1.8.1.4 {ECO:0000256|RuleBase:RU003692};	At3g16950	GO:0009941,chloroplast envelope; GO:0009570,chloroplast stroma; GO:0005829,cytosol; GO:0005730,nucleolus; GO:0004148,dihydrolipoyl dehydrogenase activity; GO:0050660,flavin adenine dinucleotide binding; GO:0006086,acetyl-CoA biosynthetic process from pyruvate; GO:0045454,cell redox homeostasis; GO:0046685,response to arsenic-containing substance; GO:0003674,molecular_function; GO:0003824,catalyti…	PF07992.14:Pyridine nucleotide-disulphide oxidoreductase	--	--	--
TraesCS1B02G104200	TRUE	FALSE	TRUE	FALSE	3.19	2.38	2.7	2.75667	0.85	1.75	0.8	1.13333	1.37	0.81	0.73	0.97	2.96	0.96	0.63	1.51667	1B	114686573	114687445	+	TraesCS1B02G104200	Phosphoglycerate kinase [Source:UniProtKB/TrEMBL%3BAcc:W5AAA5]	K00927 phosphoglycerate kinase [EC:2.7.2.3] | (RefSeq) phosphoglycerate kinase, cytosolic (A)	ko00010: Glycolysis / Gluconeogenesis; ko00710: Carbon fixation in photosynthetic organisms; ko01100: Metabolic pathways; ko01110: Biosynthesis of secondary metabolites; ko01200: Carbon metabolism; ko01230: Biosynthesis of amino acids	predicted protein, partial [Hordeum vulgare subsp. vulgare]	PGKY_WHEAT RecName: Full=Phosphoglycerate kinase, cytosolic; EC=2.7.2.3;	A0A446JM34_TRITD RecName: Full=Phosphoglycerate kinase {ECO:0000256|ARBA:ARBA00013061, ECO:0000256|RuleBase:RU000532}; EC=2.7.2.3 {ECO:0000256|ARBA:ARBA00013061, ECO:0000256|RuleBase:RU000532};	At1g79550	GO:0005829,cytosol; GO:0043531,ADP binding; GO:0005524,ATP binding; GO:0004618,phosphoglycerate kinase activity; GO:0006094,gluconeogenesis; GO:0006096,glycolytic process; GO:0000166,nucleotide binding; GO:0003674,molecular_function; GO:0005488,binding; GO:0017076,purine nucleotide binding; GO:0030554,adenyl nucleotide binding; GO:0032553,ribonucleotide binding; GO:0032555,purine ribonucleotide b…	PF00162.19:Phosphoglycerate kinase	--	--	--
TraesCS1B02G090600	TRUE	FALSE	FALSE	FALSE	4.92	3.57	3.05	3.84667	9.04	13.18	9.65	10.6233	6.49	7.18	7.32	6.99667	6.91	9.43	8.69	8.34333	1B	91877727	91881186	+	TraesCS1B02G090600	--	K00818 acetylornithine aminotransferase [EC:2.6.1.11] | (RefSeq) acetylornithine aminotransferase, mitochondrial-like (A)	ko00220: Arginine biosynthesis; ko01100: Metabolic pathways; ko01110: Biosynthesis of secondary metabolites; ko01210: 2-Oxocarboxylic acid metabolism; ko01230: Biosynthesis of amino acids	acetylornithine aminotransferase, mitochondrial-like [Aegilops tauschii subsp. tauschii]	ARGD_ALNGL RecName: Full=Acetylornithine aminotransferase, mitochondrial; Short=ACOAT; EC=2.6.1.11; AltName: Full=Acetylornithine transaminase; Short=AOTA; Flags: Precursor;	A0A446ILM8_TRITD RecName: Full=Acetylornithine transaminase {ECO:0000256|ARBA:ARBA00012919}; EC=2.6.1.11 {ECO:0000256|ARBA:ARBA00012919};	At1g80600	GO:0005739,mitochondrion; GO:0003992,N2-acetyl-L-ornithine:2-oxoglutarate 5-aminotransferase activity; GO:0030170,pyridoxal phosphate binding; GO:0006526,arginine biosynthetic process; GO:0003674,molecular_function; GO:0003824,catalytic activity; GO:0008483,transaminase activity; GO:0016740,transferase activity; GO:0016769,transferase activity, transferring nitrogenous groups; GO:0005488,binding;…	PF00202.21:Aminotransferase class-III	--	--	--
TraesCS1B02G080400	TRUE	TRUE	FALSE	FALSE	0.33	0.86	1.83	1.00667	7.03	5	10.94	7.65667	1.69	3.06	3.12	2.62333	6.54	5.57	7.97	6.69333	1B	62719857	62724509	+	TraesCS1B02G080400	Glycosyltransferase [Source:UniProtKB/TrEMBL%3BAcc:A0A341NWY7]	K00927 phosphoglycerate kinase [EC:2.7.2.3] | (RefSeq) uncharacterized LOC109182250 (A)	ko00010: Glycolysis / Gluconeogenesis; ko00710: Carbon fixation in photosynthetic organisms; ko01100: Metabolic pathways; ko01110: Biosynthesis of secondary metabolites; ko01200: Carbon metabolism; ko01230: Biosynthesis of amino acids	predicted protein [Hordeum vulgare subsp. vulgare]	U86A1_ARATH RecName: Full=UDP-glycosyltransferase 86A1; EC=2.4.1.-;	A0A3B5YS61_WHEAT RecName: Full=Glycosyltransferase {ECO:0000256|RuleBase:RU362057}; EC=2.4.1.- {ECO:0000256|RuleBase:RU362057};	At2g36970	GO:0008194,UDP-glycosyltransferase activity; GO:0003674,molecular_function; GO:0003824,catalytic activity; GO:0016740,transferase activity; GO:0016757,transferase activity, transferring glycosyl groups	PF00201.18:UDP-glucoronosyl and UDP-glucosyl transferase	--	--	--
TraesCS1A02G382800	TRUE	FALSE	FALSE	FALSE	5.73	4.27	3.9	4.63333	2.22	2.45	1.88	2.18333	4.69	6.91	6.21	5.93667	2.32	6.62	2.14	3.69333	1A	553535726	553542082	+	TraesCS1A02G382800	--	K01953 asparagine synthase (glutamine-hydrolysing) [EC:6.3.5.4] | (RefSeq) asparagine synthetase [glutamine-hydrolyzing] 2-like (A)	ko00250: Alanine, aspartate and glutamate metabolism; ko01100: Metabolic pathways; ko01110: Biosynthesis of secondary metabolites; ko01230: Biosynthesis of amino acids	asparagine synthetase [Secale cereale x Triticum turgidum subsp. durum]	ASNS2_ORYSJ RecName: Full=Asparagine synthetase [glutamine-hydrolyzing] 2; EC=6.3.5.4; AltName: Full=Glutamine-dependent asparagine synthetase 2;	A0A3B5Y673_WHEAT RecName: Full=Asparagine synthetase [glutamine-hydrolyzing] {ECO:0000256|PIRNR:PIRNR001589}; EC=6.3.5.4 {ECO:0000256|PIRNR:PIRNR001589};	At5g10240	GO:0005829,cytosol; GO:0004066,asparagine synthase (glutamine-hydrolyzing) activity; GO:0005524,ATP binding; GO:0006529,asparagine biosynthetic process; GO:0006541,glutamine metabolic process; GO:0070981,L-asparagine biosynthetic process; GO:0003674,molecular_function; GO:0003824,catalytic activity; GO:0016874,ligase activity; GO:0016879,ligase activity, forming carbon-nitrogen bonds; GO:0016884,…	PF00733.21:Asparagine synthase	--	--	--
TraesCS1A02G281400	TRUE	TRUE	FALSE	FALSE	10.16	6.9	6.85	7.97	3.64	2.36	5.43	3.81	8.73	12.71	6.83	9.42333	2.88	5.59	4.47	4.31333	1A	479827961	479840208	-	TraesCS1A02G281400	Delta-1-pyrroline-5-carboxylate synthase [Source:UniProtKB/TrEMBL%3BAcc:A0A341NRQ0]	K12657 delta-1-pyrroline-5-carboxylate synthetase [EC:2.7.2.11 1.2.1.41] | (RefSeq) delta-1-pyrroline-5-carboxylate synthase 1 (A)	ko00330: Arginine and proline metabolism; ko01100: Metabolic pathways; ko01110: Biosynthesis of secondary metabolites; ko01230: Biosynthesis of amino acids	delta 1-pyrroline-5-carboxylate synthetase [Triticum aestivum]	P5CS1_ORYSJ RecName: Full=Delta-1-pyrroline-5-carboxylate synthase 1 {ECO:0000305}; Short=OsP5CS1 {ECO:0000303|Ref.8}; Includes: RecName: Full=Glutamate 5-kinase; Short=GK; EC=2.7.2.11; AltName: Full=Gamma-glutamyl kinase; Includes: RecName: Full=Gamma-glutamyl phosphate reductase; Short=GPR; EC=1.2.1.41; AltName: Full=Glutamate-5-semialdehyde dehydrogenase; AltName: Full=Glutamyl-gamma-semialdeh…	A0A3B5Y2D7_WHEAT RecName: Full=Delta-1-pyrroline-5-carboxylate synthase {ECO:0000256|PIRNR:PIRNR036429}; Includes: RecName: Full=Glutamate 5-kinase {ECO:0000256|PIRNR:PIRNR036429}; Short=GK {ECO:0000256|PIRNR:PIRNR036429}; EC=2.7.2.11 {ECO:0000256|PIRNR:PIRNR036429}; AltName: Full=Gamma-glutamyl kinase {ECO:0000256|PIRNR:PIRNR036429}; Includes: RecName: Full=Gamma-glutamyl phosphate reductase {EC…	At2g39800_2	GO:0005737,cytoplasm; GO:0005524,ATP binding; GO:0004349,glutamate 5-kinase activity; GO:0004350,glutamate-5-semialdehyde dehydrogenase activity; GO:0055129,L-proline biosynthetic process; GO:0006561,proline biosynthetic process; GO:0000166,nucleotide binding; GO:0003674,molecular_function; GO:0005488,binding; GO:0017076,purine nucleotide binding; GO:0030554,adenyl nucleotide binding; GO:0032553,…	PF00696.28:Amino acid kinase family	--	--	--
TraesCS1A02G195500	TRUE	TRUE	FALSE	FALSE	0.55	0.27	0.58	0.466667	2.3	1.86	3.56	2.57333	0.11	0.34	0.27	0.24	1.7	1.13	0.87	1.23333	1A	353256784	353259995	-	TraesCS1A02G195500	--	K00891 shikimate kinase [EC:2.7.1.71] | (RefSeq) shikimate kinase (A)	ko00400: Phenylalanine, tyrosine and tryptophan biosynthesis; ko01100: Metabolic pathways; ko01110: Biosynthesis of secondary metabolites; ko01230: Biosynthesis of amino acids	shikimate kinase [Triticum aestivum]	SKL2_ARATH RecName: Full=Probable inactive shikimate kinase like 2, chloroplastic; Short=AtSKL2; Flags: Precursor;	A0A3B5XZH3_WHEAT RecName: Full=CS domain-containing protein {ECO:0000259|PROSITE:PS51203};	At2g35500	GO:0009507,chloroplast; GO:0016310,phosphorylation; GO:0006793,phosphorus metabolic process; GO:0006796,phosphate-containing compound metabolic process; GO:0008150,biological_process; GO:0008152,metabolic process; GO:0009987,cellular process; GO:0044237,cellular metabolic process; GO:0005575,cellular_component; GO:0005622,intracellular anatomical structure; GO:0005737,cytoplasm; GO:0009536,plasti…	PF01202.22:Shikimate kinase	--	--	--
TraesCS1A02G190800	TRUE	FALSE	FALSE	FALSE	14.48	12.28	9.7	12.1533	32.54	28.48	33.32	31.4467	15.67	17.19	15.37	16.0767	27.72	21.88	24.59	24.73	1A	345108253	345116586	-	TraesCS1A02G190800	--	K05605 3-hydroxyisobutyryl-CoA hydrolase [EC:3.1.2.4] | (RefSeq) 3-hydroxyisobutyryl-CoA hydrolase 1-like isoform X1 (A)	ko00280: Valine, leucine and isoleucine degradation; ko00410: beta-Alanine metabolism; ko00640: Propanoate metabolism; ko01100: Metabolic pathways; ko01200: Carbon metabolism	3-hydroxyisobutyryl-CoA hydrolase 1 [Triticum urartu]	HIBC1_ARATH RecName: Full=3-hydroxyisobutyryl-CoA hydrolase 1; EC=3.1.2.-; EC=3.1.2.4; AltName: Full=CoA-thioester hydrolase CHY1;	A0A3B5XZC0_WHEAT SubName: Full=Uncharacterized protein {ECO:0000313|EnsemblPlants:TraesCS1A02G190800.1};	At5g65940	GO:0005777,peroxisome; GO:0009536,plastid; GO:0003860,3-hydroxyisobutyryl-CoA hydrolase activity; GO:0009083,branched-chain amino acid catabolic process; GO:0009409,response to cold; GO:0006574,valine catabolic process; GO:0003674,molecular_function; GO:0003824,catalytic activity; GO:0016289,CoA hydrolase activity; GO:0016787,hydrolase activity; GO:0016788,hydrolase activity, acting on ester bond…	PF16113.5:Enoyl-CoA hydratase/isomerase	--	--	--
TraesCS1A02G188000	TRUE	TRUE	FALSE	FALSE	1.72	1.37	1.36	1.48333	0.37	0.4	0.58	0.45	1.44	0.57	1.48	1.16333	0.36	0.28	0	0.213333	1A	339483296	339484492	+	TraesCS1A02G188000	--	K05359 arogenate/prephenate dehydratase [EC:4.2.1.91 4.2.1.51] | (RefSeq) arogenate dehydratase 3, chloroplastic-like (A)	ko00400: Phenylalanine, tyrosine and tryptophan biosynthesis; ko01100: Metabolic pathways; ko01110: Biosynthesis of secondary metabolites; ko01230: Biosynthesis of amino acids	arogenate dehydratase 3, chloroplastic-like [Aegilops tauschii subsp. tauschii]	AROD1_PETHY RecName: Full=Arogenate dehydratase 1 {ECO:0000303|PubMed:20215586}; Short=PhADT1 {ECO:0000303|PubMed:20215586}; EC=4.2.1.91 {ECO:0000269|PubMed:20215586}; Flags: Precursor;	A0A446IXE5_TRITD RecName: Full=Prephenate dehydratase domain-containing protein {ECO:0000259|PROSITE:PS51171};	At1g08250	GO:0009507,chloroplast; GO:0009570,chloroplast stroma; GO:0047769,arogenate dehydratase activity; GO:0007623,circadian rhythm; GO:0009094,L-phenylalanine biosynthetic process; GO:0003674,molecular_function; GO:0003824,catalytic activity; GO:0016829,lyase activity; GO:0016835,carbon-oxygen lyase activity; GO:0016836,hydro-lyase activity; GO:0008150,biological_process; GO:0048511,rhythmic process; …	PF00800.18:Prephenate dehydratase	--	--	--
TraesCS1A02G072200	TRUE	FALSE	FALSE	FALSE	4.33	4.14	3.07	3.84667	7.88	11.63	5.81	8.44	6.67	10.83	5.52	7.67333	7.35	8.78	6.92	7.68333	1A	54461054	54463277	-	TraesCS1A02G072200	--	K00818 acetylornithine aminotransferase [EC:2.6.1.11] | (RefSeq) acetylornithine aminotransferase, mitochondrial-like (A)	ko00220: Arginine biosynthesis; ko01100: Metabolic pathways; ko01110: Biosynthesis of secondary metabolites; ko01210: 2-Oxocarboxylic acid metabolism; ko01230: Biosynthesis of amino acids	predicted protein [Hordeum vulgare subsp. vulgare]	ARGD_ALNGL RecName: Full=Acetylornithine aminotransferase, mitochondrial; Short=ACOAT; EC=2.6.1.11; AltName: Full=Acetylornithine transaminase; Short=AOTA; Flags: Precursor;	A0A446ILM8_TRITD RecName: Full=Acetylornithine transaminase {ECO:0000256|ARBA:ARBA00012919}; EC=2.6.1.11 {ECO:0000256|ARBA:ARBA00012919};	At1g80600	GO:0005739,mitochondrion; GO:0003992,N2-acetyl-L-ornithine:2-oxoglutarate 5-aminotransferase activity; GO:0030170,pyridoxal phosphate binding; GO:0006526,arginine biosynthetic process; GO:0003674,molecular_function; GO:0003824,catalytic activity; GO:0008483,transaminase activity; GO:0016740,transferase activity; GO:0016769,transferase activity, transferring nitrogenous groups; GO:0005488,binding;…	PF00202.21:Aminotransferase class-III	--	--	--
TraesCS1A02G061700	TRUE	FALSE	FALSE	TRUE	2.71	3.77	3.96	3.48	6.85	6.67	13.13	8.88333	1.42	2.25	2.99	2.22	4.4	1.53	4.4	3.44333	1A	42251606	42256435	+	TraesCS1A02G061700	--	K00927 phosphoglycerate kinase [EC:2.7.2.3] | (RefSeq) uncharacterized LOC109182250 (A)	ko00010: Glycolysis / Gluconeogenesis; ko00710: Carbon fixation in photosynthetic organisms; ko01100: Metabolic pathways; ko01110: Biosynthesis of secondary metabolites; ko01200: Carbon metabolism; ko01230: Biosynthesis of amino acids	UDP-glycosyltransferase 86A1 isoform X1 [Aegilops tauschii subsp. tauschii]	U86A1_ARATH RecName: Full=UDP-glycosyltransferase 86A1; EC=2.4.1.-;	A0A3B5XUN0_WHEAT RecName: Full=Glycosyltransferase {ECO:0000256|RuleBase:RU362057}; EC=2.4.1.- {ECO:0000256|RuleBase:RU362057};	At2g36970	GO:0008194,UDP-glycosyltransferase activity; GO:0003674,molecular_function; GO:0003824,catalytic activity; GO:0016740,transferase activity; GO:0016757,transferase activity, transferring glycosyl groups	PF00201.18:UDP-glucoronosyl and UDP-glucosyl transferase	--	--	--
TraesCS1A02G061600	TRUE	FALSE	FALSE	TRUE	0.14	0.07	0.09	0.1	1.38	0.84	2.47	1.56333	0	0.08	0	0.0266667	0.02	0.05	0	0.0233333	1A	42217457	42220780	-	TraesCS1A02G061600	--	K00927 phosphoglycerate kinase [EC:2.7.2.3] | (RefSeq) uncharacterized LOC109182250 (A)	ko00010: Glycolysis / Gluconeogenesis; ko00710: Carbon fixation in photosynthetic organisms; ko01100: Metabolic pathways; ko01110: Biosynthesis of secondary metabolites; ko01200: Carbon metabolism; ko01230: Biosynthesis of amino acids	predicted protein [Hordeum vulgare subsp. vulgare]	U86A1_ARATH RecName: Full=UDP-glycosyltransferase 86A1; EC=2.4.1.-;	A0A446IKW3_TRITD RecName: Full=Glycosyltransferase {ECO:0000256|RuleBase:RU362057}; EC=2.4.1.- {ECO:0000256|RuleBase:RU362057};	At2g36970	GO:0008194,UDP-glycosyltransferase activity; GO:0003674,molecular_function; GO:0003824,catalytic activity; GO:0016740,transferase activity; GO:0016757,transferase activity, transferring glycosyl groups	PF00201.18:UDP-glucoronosyl and UDP-glucosyl transferase	--	--	--
novel.7784	TRUE	FALSE	FALSE	FALSE	0.59	1.76	1.64	1.33	6.02	4.99	6.17	5.72667	2.45	1.13	2.5	2.02667	1.22	6.56	4.01	3.93	2D	547780368	547784647	-	--	--	K00145 N-acetyl-gamma-glutamyl-phosphate reductase [EC:1.2.1.38] | (RefSeq) probable N-acetyl-gamma-glutamyl-phosphate reductase, chloroplastic (A)	ko00220: Arginine biosynthesis; ko01100: Metabolic pathways; ko01110: Biosynthesis of secondary metabolites; ko01210: 2-Oxocarboxylic acid metabolism; ko01230: Biosynthesis of amino acids	N-acetyl-gamma-glutamyl-phosphate reductase, chloroplast precursor, putative, expressed [Oryza sativa Japonica Group]	ARGC_ORYSJ RecName: Full=Probable N-acetyl-gamma-glutamyl-phosphate reductase, chloroplastic; Short=AGPR; EC=1.2.1.38; AltName: Full=N-acetyl-glutamate semialdehyde dehydrogenase; Short=NAGSA dehydrogenase; Flags: Precursor;	A0A453CV13_AEGTS SubName: Full=Uncharacterized protein {ECO:0000313|EnsemblPlants:AET2Gv20969600.10};	--	GO:0009507,chloroplast; GO:0003942,N-acetyl-gamma-glutamyl-phosphate reductase activity; GO:0051287,NAD binding; GO:0046983,protein dimerization activity; GO:0006526,arginine biosynthetic process; GO:0003674,molecular_function; GO:0003824,catalytic activity; GO:0016491,oxidoreductase activity; GO:0016620,oxidoreductase activity, acting on the aldehyde or oxo group of donors, NAD or NADP as accept…	--	--	--	--
novel.6942	TRUE	FALSE	TRUE	FALSE	2.49	1.53	1.56	1.86	0.36	0.68	0.13	0.39	1.1	0.34	0.42	0.62	0.23	0.18	0.32	0.243333	2D	84747244	84757095	+	--	--	K01623 fructose-bisphosphate aldolase, class I [EC:4.1.2.13] | (RefSeq) fructose-bisphosphate aldolase 1, chloroplastic-like (A)	ko00010: Glycolysis / Gluconeogenesis; ko00030: Pentose phosphate pathway; ko00051: Fructose and mannose metabolism; ko00710: Carbon fixation in photosynthetic organisms; ko01100: Metabolic pathways; ko01110: Biosynthesis of secondary metabolites; ko01200: Carbon metabolism; ko01230: Biosynthesis of amino acids	retrotransposon protein, putative, Ty3-gypsy sub-class [Oryza sativa Japonica Group]	--	A0A6V7NJG2_ANACO RecName: Full=Chromo domain-containing protein {ECO:0000259|PROSITE:PS50013};	At2g04670	--	PF17917.1:RNase H-like domain found in reverse transcriptase	--	--	--
novel.6062	TRUE	TRUE	FALSE	FALSE	1.48	1.88	1.87	1.74333	0.56	0.58	0.54	0.56	1.35	2.75	1.58	1.89333	0.21	0.91	0.68	0.6	2B	442920751	442928239	+	--	--	K15849 bifunctional aspartate aminotransferase and glutamate/aspartate-prephenate aminotransferase [EC:2.6.1.1 2.6.1.78 2.6.1.79] | (RefSeq) uncharacterized protein LOC123045393 isoform X1 (A)	ko00350: Tyrosine metabolism; ko00360: Phenylalanine metabolism; ko00400: Phenylalanine, tyrosine and tryptophan biosynthesis; ko00950: Isoquinoline alkaloid biosynthesis; ko00960: Tropane, piperidine and pyridine alkaloid biosynthesis; ko01100: Metabolic pathways; ko01110: Biosynthesis of secondary metabolites; ko01230: Biosynthesis of amino acids	unnamed protein product [Triticum aestivum]	SWC4_ARATH RecName: Full=SWR1-complex protein 4;	A0A446MCT7_TRITD SubName: Full=Uncharacterized protein {ECO:0000313|EMBL:VAH47614.1};	At2g47210	GO:0035267,NuA4 histone acetyltransferase complex; GO:0005634,nucleus; GO:0000812,Swr1 complex; GO:0003677,DNA binding; GO:0003714,transcription corepressor activity; GO:0006281,DNA repair; GO:0043486,histone exchange; GO:0043968,histone H2A acetylation; GO:0043967,histone H4 acetylation; GO:0000122,negative regulation of transcription by RNA polymerase II; GO:0003674,molecular_function; GO:00036…	--	--	--	--
novel.601	TRUE	FALSE	TRUE	TRUE	3.62	3.25	1.71	2.86	0.8	0.74	0.25	0.596667	0	0	0	0	0	0	0	0	1A	283714472	283719905	-	--	--	K00134 glyceraldehyde 3-phosphate dehydrogenase (phosphorylating) [EC:1.2.1.12] | (RefSeq) glyceraldehyde-3-phosphate dehydrogenase GAPCP1, chloroplastic (A)	ko00010: Glycolysis / Gluconeogenesis; ko00710: Carbon fixation in photosynthetic organisms; ko01100: Metabolic pathways; ko01110: Biosynthesis of secondary metabolites; ko01200: Carbon metabolism; ko01230: Biosynthesis of amino acids	hypothetical protein TRIUR3_32983 [Triticum urartu]	--	A0A453CE73_AEGTS SubName: Full=Uncharacterized protein {ECO:0000313|EnsemblPlants:AET2Gv20817600.7};	--	--	--	--	--	--
novel.5938	TRUE	TRUE	FALSE	FALSE	4.23	3.96	3.45	3.88	1.1	1.24	0.98	1.10667	4.3	6.59	4.75	5.21333	1.45	2.71	1.4	1.85333	2B	364677052	364684978	+	--	--	K12657 delta-1-pyrroline-5-carboxylate synthetase [EC:2.7.2.11 1.2.1.41] | (RefSeq) delta-1-pyrroline-5-carboxylate synthase 2 (A)	ko00330: Arginine and proline metabolism; ko01100: Metabolic pathways; ko01110: Biosynthesis of secondary metabolites; ko01230: Biosynthesis of amino acids	FBD-associated F-box protein At5g60610-like [Aegilops tauschii subsp. tauschii]	P5CS2_ORYSJ RecName: Full=Delta-1-pyrroline-5-carboxylate synthase 2 {ECO:0000305}; Short=OsP5CS2 {ECO:0000303|Ref.7}; Includes: RecName: Full=Glutamate 5-kinase; Short=GK; EC=2.7.2.11; AltName: Full=Gamma-glutamyl kinase; Includes: RecName: Full=Gamma-glutamyl phosphate reductase; Short=GPR; EC=1.2.1.41; AltName: Full=Glutamate-5-semialdehyde dehydrogenase; AltName: Full=Glutamyl-gamma-semialdeh…	A0A446M937_TRITD SubName: Full=Uncharacterized protein {ECO:0000313|EMBL:VAH46386.1};	--	GO:0005737,cytoplasm; GO:0005524,ATP binding; GO:0004349,glutamate 5-kinase activity; GO:0004350,glutamate-5-semialdehyde dehydrogenase activity; GO:0055129,L-proline biosynthetic process; GO:0006561,proline biosynthetic process; GO:0000166,nucleotide binding; GO:0003674,molecular_function; GO:0005488,binding; GO:0017076,purine nucleotide binding; GO:0030554,adenyl nucleotide binding; GO:0032553,…	--	--	--	--
novel.5924	TRUE	FALSE	FALSE	FALSE	6.16	5.86	6.24	6.08667	2.02	4.19	2.16	2.79	4.76	4.7	8.24	5.9	3.21	7.67	3.78	4.88667	2B	357885093	357886745	+	--	--	K00850 6-phosphofructokinase 1 [EC:2.7.1.11] | (RefSeq) ATP-dependent 6-phosphofructokinase 2-like (A)	ko00010: Glycolysis / Gluconeogenesis; ko00030: Pentose phosphate pathway; ko00051: Fructose and mannose metabolism; ko00052: Galactose metabolism; ko01100: Metabolic pathways; ko01110: Biosynthesis of secondary metabolites; ko01200: Carbon metabolism; ko01230: Biosynthesis of amino acids; ko03018: RNA degradation	predicted protein [Hordeum vulgare subsp. vulgare]	PFKA2_ARATH RecName: Full=ATP-dependent 6-phosphofructokinase 2 {ECO:0000255|HAMAP-Rule:MF_03186}; Short=ATP-PFK 2 {ECO:0000255|HAMAP-Rule:MF_03186}; Short=Phosphofructokinase 2 {ECO:0000255|HAMAP-Rule:MF_03186}; EC=2.7.1.11 {ECO:0000255|HAMAP-Rule:MF_03186}; AltName: Full=Phosphohexokinase 2 {ECO:0000255|HAMAP-Rule:MF_03186};	A0A287IMT6_HORVV RecName: Full=PFK domain-containing protein {ECO:0000259|Pfam:PF00365};	At5g47810	GO:0005737,cytoplasm; GO:0005829,cytosol; GO:0003872,6-phosphofructokinase activity; GO:0005524,ATP binding; GO:0046872,metal ion binding; GO:0006002,fructose 6-phosphate metabolic process; GO:0006096,glycolytic process; GO:0003674,molecular_function; GO:0003824,catalytic activity; GO:0008443,phosphofructokinase activity; GO:0016301,kinase activity; GO:0016740,transferase activity; GO:0016772,tra…	PF00365.20:Phosphofructokinase	--	--	--
novel.5256	TRUE	FALSE	TRUE	FALSE	6.77	7.53	12.06	8.78667	1.03	1.06	3.18	1.75667	1.12	0.58	1.54	1.08	1.94	1.05	0.85	1.28	2B	29539663	29541878	-	--	--	K00020 3-hydroxyisobutyrate dehydrogenase [EC:1.1.1.31] | (RAP-DB) Os05g0565500; 3-hydroxyacid dehydrogenase/reductase domain containing protein. (A)	ko00280: Valine, leucine and isoleucine degradation; ko01100: Metabolic pathways	unnamed protein product [Oryza sativa Japonica Group]	--	A0A453L040_AEGTS SubName: Full=Uncharacterized protein {ECO:0000313|EnsemblPlants:AET5Gv20579200.2};	--	--	--	--	--	--
novel.4905	TRUE	FALSE	FALSE	TRUE	0.32	0.12	0.55	0.33	1.87	0.97	3.48	2.10667	0	0	0	0	0	0	0	0	2A	657881785	657884451	+	--	--	K01915 glutamine synthetase [EC:6.3.1.2] | (RefSeq) glutamine synthetase cytosolic isozyme 1-2-like (A)	ko00220: Arginine biosynthesis; ko00250: Alanine, aspartate and glutamate metabolism; ko00630: Glyoxylate and dicarboxylate metabolism; ko00910: Nitrogen metabolism; ko01100: Metabolic pathways; ko01230: Biosynthesis of amino acids	Glutamine synthetase cytosolic isozyme 1-2 [Triticum urartu]	GLN11_ORYSJ RecName: Full=Glutamine synthetase cytosolic isozyme 1-1 {ECO:0000305}; EC=6.3.1.2 {ECO:0000269|PubMed:15574840}; AltName: Full=Glutamate--ammonia ligase GLN1;1 {ECO:0000305}; Short=OsGLN1;1 {ECO:0000303|PubMed:15574840}; AltName: Full=Glutamine synthetase shoot isozyme {ECO:0000305}; AltName: Full=OsGS1;1 {ECO:0000303|Ref.2};	M7ZEN9_TRIUA RecName: Full=Glutamine synthetase {ECO:0000256|ARBA:ARBA00012937, ECO:0000256|RuleBase:RU004356}; EC=6.3.1.2 {ECO:0000256|ARBA:ARBA00012937, ECO:0000256|RuleBase:RU004356};	At3g17820	GO:0005737,cytoplasm; GO:0005524,ATP binding; GO:0004356,glutamate-ammonia ligase activity; GO:0006542,glutamine biosynthetic process; GO:0000166,nucleotide binding; GO:0003674,molecular_function; GO:0005488,binding; GO:0017076,purine nucleotide binding; GO:0030554,adenyl nucleotide binding; GO:0032553,ribonucleotide binding; GO:0032555,purine ribonucleotide binding; GO:0032559,adenyl ribonucleot…	PF10358.9:N-terminal C2 in EEIG1 and EHBP1 proteins	--	--	--
novel.4617	TRUE	FALSE	FALSE	FALSE	6.42	5.31	5.48	5.73667	12.19	12.52	11.46	12.0567	8.71	11.01	7.68	9.13333	12.62	11.62	10.77	11.67	2A	445997646	445999802	+	--	--	K01807 ribose 5-phosphate isomerase A [EC:5.3.1.6] | (RefSeq) probable ribose-5-phosphate isomerase 2 (A)	ko00030: Pentose phosphate pathway; ko00710: Carbon fixation in photosynthetic organisms; ko01100: Metabolic pathways; ko01110: Biosynthesis of secondary metabolites; ko01200: Carbon metabolism; ko01230: Biosynthesis of amino acids	probable ribose-5-phosphate isomerase 2 [Aegilops tauschii subsp. tauschii]	RPI2_ARATH RecName: Full=Probable ribose-5-phosphate isomerase 2; EC=5.3.1.6; AltName: Full=Phosphoriboisomerase 2;	A0A446L1A4_TRITD RecName: Full=Ribose-5-phosphate isomerase {ECO:0000256|ARBA:ARBA00011959}; EC=5.3.1.6 {ECO:0000256|ARBA:ARBA00011959};	At2g01290	GO:0005737,cytoplasm; GO:0004751,ribose-5-phosphate isomerase activity; GO:0008219,cell death; GO:0009052,pentose-phosphate shunt, non-oxidative branch; GO:0010228,vegetative to reproductive phase transition of meristem; GO:0003674,molecular_function; GO:0003824,catalytic activity; GO:0016853,isomerase activity; GO:0016860,intramolecular oxidoreductase activity; GO:0016861,intramolecular oxidored…	PF06026.14:Ribose 5-phosphate isomerase A (phosphoriboisomerase A)	--	--	--
novel.3857	TRUE	TRUE	FALSE	FALSE	1.85	3.34	3.98	3.05667	6.31	7.46	11.75	8.50667	2.67	8.01	3.13	4.60333	19.77	12.72	24.57	19.02	2A	23627859	23630363	+	--	--	K00020 3-hydroxyisobutyrate dehydrogenase [EC:1.1.1.31] | (RefSeq) probable 3-hydroxyisobutyrate dehydrogenase-like 3, mitochondrial (A)	ko00280: Valine, leucine and isoleucine degradation; ko01100: Metabolic pathways	hypothetical protein TRIUR3_35436 [Triticum urartu]	BH093_ARATH RecName: Full=Transcription factor bHLH93; AltName: Full=Basic helix-loop-helix protein 93; Short=AtbHLH93; Short=bHLH 93; AltName: Full=Transcription factor EN 47; AltName: Full=bHLH transcription factor bHLH093;	M7YMV5_TRIUA SubName: Full=Uncharacterized protein {ECO:0000313|EMBL:EMS48256.1, ECO:0000313|EnsemblPlants:TRIUR3_35436-P1};	--	GO:0005634,nucleus; GO:0003700,DNA-binding transcription factor activity; GO:0046983,protein dimerization activity; GO:0043565,sequence-specific DNA binding; GO:0045487,gibberellin catabolic process; GO:0007275,multicellular organism development; GO:0010371,regulation of gibberellin biosynthetic process; GO:0006355,regulation of transcription, DNA-templated; GO:0003674,molecular_function; GO:0140…	--	--	--	--
novel.3053	TRUE	FALSE	TRUE	FALSE	3.07	2.31	1.6	2.32667	0.12	0.06	0	0.06	0	0	0	0	0	0	0	0	1D	126375123	126385021	-	--	--	K01623 fructose-bisphosphate aldolase, class I [EC:4.1.2.13] | (RefSeq) fructose-bisphosphate aldolase 1, chloroplastic-like (A)	ko00010: Glycolysis / Gluconeogenesis; ko00030: Pentose phosphate pathway; ko00051: Fructose and mannose metabolism; ko00710: Carbon fixation in photosynthetic organisms; ko01100: Metabolic pathways; ko01110: Biosynthesis of secondary metabolites; ko01200: Carbon metabolism; ko01230: Biosynthesis of amino acids	uncharacterized protein LOC109785897 [Aegilops tauschii subsp. tauschii]	--	A0A7H4LG43_WHEAT SubName: Full=Genome assembly, chromosome: II {ECO:0000313|EMBL:SPT17581.1};	At4g10580	GO:0003676,nucleic acid binding; GO:0008270,zinc ion binding; GO:0003674,molecular_function; GO:0005488,binding; GO:0097159,organic cyclic compound binding; GO:1901363,heterocyclic compound binding; GO:0043167,ion binding; GO:0043169,cation binding; GO:0046872,metal ion binding; GO:0046914,transition metal ion binding	PF03732.17:Retrotransposon gag protein	--	--	--
novel.27582	TRUE	TRUE	TRUE	TRUE	0.15	0.7	0.83	0.56	0.02	0.22	0	0.08	8.3	4.44	5.4	6.04667	1.17	3.28	0.84	1.76333	Un	38584023	38606236	-	--	--	K14085 aldehyde dehydrogenase family 7 member A1 [EC:1.2.1.31 1.2.1.8 1.2.1.3] | (RefSeq) aldehyde dehydrogenase family 2 member C4-like (A)	ko00010: Glycolysis / Gluconeogenesis; ko00053: Ascorbate and aldarate metabolism; ko00071: Fatty acid degradation; ko00260: Glycine, serine and threonine metabolism; ko00280: Valine, leucine and isoleucine degradation; ko00310: Lysine degradation; ko00330: Arginine and proline metabolism; ko00340: Histidine metabolism; ko00380: Tryptophan metabolism; ko00410: beta-Alanine metabolism; ko00561: Gl…	uncharacterized protein LOC109745703 [Aegilops tauschii subsp. tauschii]	RGA2_SOLBU RecName: Full=Disease resistance protein RGA2; AltName: Full=Blight resistance protein RPI; AltName: Full=RGA2-blb;	A0A7H4LFP7_WHEAT SubName: Full=Genome assembly, chromosome: II {ECO:0000313|EMBL:SPT17435.1};	At3g15310	GO:0043531,ADP binding; GO:0005524,ATP binding; GO:0006952,defense response; GO:0000166,nucleotide binding; GO:0003674,molecular_function; GO:0005488,binding; GO:0017076,purine nucleotide binding; GO:0030554,adenyl nucleotide binding; GO:0032553,ribonucleotide binding; GO:0032555,purine ribonucleotide binding; GO:0032559,adenyl ribonucleotide binding; GO:0036094,small molecule binding; GO:0043167…	PF04827.14:Plant transposon protein	--	--	--
novel.25110	TRUE	FALSE	TRUE	FALSE	1.37	1.86	2.74	1.99	0.37	0.61	0.08	0.353333	0.7	0.27	0.42	0.463333	0	0.22	0.47	0.23	7B	284123848	284133474	-	--	--	K01623 fructose-bisphosphate aldolase, class I [EC:4.1.2.13] | (RefSeq) fructose-bisphosphate aldolase 1, chloroplastic-like (A)	ko00010: Glycolysis / Gluconeogenesis; ko00030: Pentose phosphate pathway; ko00051: Fructose and mannose metabolism; ko00710: Carbon fixation in photosynthetic organisms; ko01100: Metabolic pathways; ko01110: Biosynthesis of secondary metabolites; ko01200: Carbon metabolism; ko01230: Biosynthesis of amino acids	uncharacterized protein LOC109785897 [Aegilops tauschii subsp. tauschii]	--	A0A7H4LG43_WHEAT SubName: Full=Genome assembly, chromosome: II {ECO:0000313|EMBL:SPT17581.1};	At4g03840	GO:0003676,nucleic acid binding; GO:0008270,zinc ion binding; GO:0003674,molecular_function; GO:0005488,binding; GO:0097159,organic cyclic compound binding; GO:1901363,heterocyclic compound binding; GO:0043167,ion binding; GO:0043169,cation binding; GO:0046872,metal ion binding; GO:0046914,transition metal ion binding	--	--	--	--
novel.24853	TRUE	FALSE	FALSE	FALSE	7.36	9.06	9.83	8.75	1.8	1.98	3.59	2.45667	9.02	9.1	7.51	8.54333	4.41	5.95	2.86	4.40667	7B	153438723	153447837	+	--	--	K01681 aconitate hydratase [EC:4.2.1.3] | (RefSeq) aconitate hydratase, cytoplasmic-like isoform X1 (A)	ko00020: Citrate cycle (TCA cycle); ko00630: Glyoxylate and dicarboxylate metabolism; ko01100: Metabolic pathways; ko01110: Biosynthesis of secondary metabolites; ko01200: Carbon metabolism; ko01210: 2-Oxocarboxylic acid metabolism; ko01230: Biosynthesis of amino acids	putative aconitate hydratase, cytoplasmic [Aegilops tauschii subsp. tauschii]	ACOC_ORYSJ RecName: Full=Putative aconitate hydratase, cytoplasmic; Short=Aconitase; EC=4.2.1.3; AltName: Full=Citrate hydro-lyase;	A0A453RDV0_AEGTS RecName: Full=Aconitate hydratase {ECO:0000256|RuleBase:RU361275}; Short=Aconitase {ECO:0000256|RuleBase:RU361275}; EC=4.2.1.3 {ECO:0000256|RuleBase:RU361275};	At2g05710	GO:0005829,cytosol; GO:0005739,mitochondrion; GO:0051539,4 iron, 4 sulfur cluster binding; GO:0003994,aconitate hydratase activity; GO:0047780,citrate dehydratase activity; GO:0046872,metal ion binding; GO:0006101,citrate metabolic process; GO:0006097,glyoxylate cycle; GO:0006099,tricarboxylic acid cycle; GO:0003674,molecular_function; GO:0005488,binding; GO:0051536,iron-sulfur cluster binding; G…	PF00330.20:Aconitase family (aconitate hydratase)	--	--	--
novel.24677	TRUE	FALSE	FALSE	FALSE	2.42	1.53	1.8	1.91667	0.8	0.99	0.48	0.756667	2.73	1.78	2.02	2.17667	1.6	3.58	1.24	2.14	7B	69712783	69714606	+	--	--	K14152 phosphoribosyl-ATP pyrophosphohydrolase / phosphoribosyl-AMP cyclohydrolase / histidinol dehydrogenase [EC:3.6.1.31 3.5.4.19 1.1.1.23] | (RefSeq) uncharacterized protein LOC111783531 (A)	ko00340: Histidine metabolism; ko01100: Metabolic pathways; ko01110: Biosynthesis of secondary metabolites; ko01230: Biosynthesis of amino acids	hypothetical protein TRIUR3_12933 [Triticum urartu]	SDI1_ARATH RecName: Full=Protein SULFUR DEFICIENCY-INDUCED 1 {ECO:0000303|PubMed:19154231}; Short=AtSDI1 {ECO:0000303|PubMed:19154231};	M7Z354_TRIUA RecName: Full=TPR_REGION domain-containing protein {ECO:0000259|PROSITE:PS50293};	At5g48850	GO:0005634,nucleus; GO:0017053,transcription repressor complex; GO:0010438,cellular response to sulfur starvation; GO:0010439,regulation of glucosinolate biosynthetic process; GO:0006792,regulation of sulfur utilization; GO:0006950,response to stress; GO:0007154,cell communication; GO:0008150,biological_process; GO:0009267,cellular response to starvation; GO:0009605,response to external stimulus;…	--	--	--	--
novel.24654	TRUE	FALSE	TRUE	FALSE	0.01	0.02	0	0.01	0.63	0.71	0.02	0.453333	2.8	3.2	2.08	2.69333	1.89	2.8	1.44	2.04333	7B	60366592	60372082	-	--	--	K01814 phosphoribosylformimino-5-aminoimidazole carboxamide ribotide isomerase [EC:5.3.1.16] | (RefSeq) uncharacterized protein LOC123160288 (A)	ko00340: Histidine metabolism; ko01100: Metabolic pathways; ko01110: Biosynthesis of secondary metabolites; ko01230: Biosynthesis of amino acids	1-(5-phosphoribosyl)-5-[(5-phosphoribosylamino)methylideneamino]	--	A0A453L4U6_AEGTS SubName: Full=Uncharacterized protein {ECO:0000313|EnsemblPlants:AET5Gv20630800.6};	--	--	--	--	--	--
novel.22922	TRUE	FALSE	FALSE	FALSE	0.14	0.15	0.21	0.166667	1.51	0.79	0.62	0.973333	0.37	0.13	0.82	0.44	1.32	0.21	1.41	0.98	6D	421038293	421039858	.	--	--	K01739 cystathionine gamma-synthase [EC:2.5.1.48] | (RefSeq) probable cystathionine gamma-synthase 2 (A)	ko00270: Cysteine and methionine metabolism; ko00450: Selenocompound metabolism; ko00920: Sulfur metabolism; ko01100: Metabolic pathways; ko01110: Biosynthesis of secondary metabolites; ko01230: Biosynthesis of amino acids	Cysteinyl-tRNA synthetase [Triticum urartu]	--	R7WEP2_AEGTA RecName: Full=SHSP domain-containing protein {ECO:0000259|PROSITE:PS01031};	--	--	--	--	--	--
novel.21593	TRUE	TRUE	FALSE	FALSE	6.18	5.63	5.8	5.87	1.78	1.93	4.53	2.74667	7.65	7.53	6.89	7.35667	2.05	3.17	2.77	2.66333	6B	502720441	502724044	+	--	--	K00927 phosphoglycerate kinase [EC:2.7.2.3] | (RefSeq) phosphoglycerate kinase, cytosolic-like (A)	ko00010: Glycolysis / Gluconeogenesis; ko00710: Carbon fixation in photosynthetic organisms; ko01100: Metabolic pathways; ko01110: Biosynthesis of secondary metabolites; ko01200: Carbon metabolism; ko01230: Biosynthesis of amino acids	Phosphoglycerate kinase, cytosolic [Triticum urartu]	PGKY_WHEAT RecName: Full=Phosphoglycerate kinase, cytosolic; EC=2.7.2.3;	A0A3B6B7X4_WHEAT RecName: Full=Phosphoglycerate kinase {ECO:0000256|ARBA:ARBA00013061, ECO:0000256|RuleBase:RU000532}; EC=2.7.2.3 {ECO:0000256|ARBA:ARBA00013061, ECO:0000256|RuleBase:RU000532};	At1g79550	GO:0005829,cytosol; GO:0043531,ADP binding; GO:0005524,ATP binding; GO:0004618,phosphoglycerate kinase activity; GO:0006094,gluconeogenesis; GO:0006096,glycolytic process; GO:0000166,nucleotide binding; GO:0003674,molecular_function; GO:0005488,binding; GO:0017076,purine nucleotide binding; GO:0030554,adenyl nucleotide binding; GO:0032553,ribonucleotide binding; GO:0032555,purine ribonucleotide b…	PF00162.19:Phosphoglycerate kinase	--	--	--
novel.20292	TRUE	TRUE	FALSE	FALSE	5.88	8.47	8.06	7.47	27.93	31.24	47.55	35.5733	5.63	5.94	5.74	5.77	21.37	17.75	20.99	20.0367	6A	522512813	522515999	-	--	--	K00128 aldehyde dehydrogenase (NAD+) [EC:1.2.1.3] | (RefSeq) benzaldehyde dehydrogenase, mitochondrial-like (A)	ko00010: Glycolysis / Gluconeogenesis; ko00053: Ascorbate and aldarate metabolism; ko00071: Fatty acid degradation; ko00280: Valine, leucine and isoleucine degradation; ko00310: Lysine degradation; ko00330: Arginine and proline metabolism; ko00340: Histidine metabolism; ko00380: Tryptophan metabolism; ko00410: beta-Alanine metabolism; ko00561: Glycerolipid metabolism; ko00620: Pyruvate metabolism…	aldehyde dehydrogenase family 2 member B7, mitochondrial-like [Aegilops tauschii subsp. tauschii]	BALDH_ANTMA RecName: Full=Benzaldehyde dehydrogenase, mitochondrial {ECO:0000303|PubMed:19292760}; EC=1.2.1.28 {ECO:0000269|PubMed:19292760}; AltName: Full=2-phenylacetaldehyde dehydrogenase {ECO:0000305}; EC=1.2.1.39 {ECO:0000269|PubMed:19292760}; AltName: Full=Acetaldehyde dehydrogenase {ECO:0000305}; EC=1.2.1.3 {ECO:0000269|PubMed:19292760}; Flags: Precursor;	A0A446WK06_TRITD RecName: Full=Aldedh domain-containing protein {ECO:0000259|Pfam:PF00171};	At1g23800	GO:0005739,mitochondrion; GO:0008774,acetaldehyde dehydrogenase (acetylating) activity; GO:0004029,aldehyde dehydrogenase (NAD+) activity; GO:0018479,benzaldehyde dehydrogenase (NAD+) activity; GO:0043878,glyceraldehyde-3-phosphate dehydrogenase (NAD+) (non-phosphorylating) activity; GO:0008957,phenylacetaldehyde dehydrogenase activity; GO:0007623,circadian rhythm; GO:0010597,green leaf volatile …	PF00171.22:Aldehyde dehydrogenase family	--	--	--
novel.20222	TRUE	TRUE	FALSE	FALSE	4.59	3.67	4.11	4.12333	0.83	0.7	0.91	0.813333	4.1	4.53	5.21	4.61333	0.55	0.66	0.65	0.62	6A	480855955	480858655	-	--	--	K01755 argininosuccinate lyase [EC:4.3.2.1] | (RefSeq) argininosuccinate lyase, chloroplastic isoform X2 (A)	ko00220: Arginine biosynthesis; ko00250: Alanine, aspartate and glutamate metabolism; ko01100: Metabolic pathways; ko01110: Biosynthesis of secondary metabolites; ko01230: Biosynthesis of amino acids	hypothetical protein TRIUR3_32609 [Triticum urartu]	--	M7ZFS6_TRIUA SubName: Full=Uncharacterized protein {ECO:0000313|EMBL:EMS62043.1, ECO:0000313|EnsemblPlants:TRIUR3_32609-P1};	--	--	--	--	--	--
novel.19952	TRUE	FALSE	FALSE	TRUE	0	0.2	0.02	0.0733333	0.59	0.54	1.66	0.93	0.03	0	0.14	0.0566667	0.24	0.02	0.07	0.11	6A	259407502	259410208	.	--	--	K15633 2,3-bisphosphoglycerate-independent phosphoglycerate mutase [EC:5.4.2.12] | (RefSeq) 2,3-bisphosphoglycerate-independent phosphoglycerate mutase-like (A)	ko00010: Glycolysis / Gluconeogenesis; ko00260: Glycine, serine and threonine metabolism; ko01100: Metabolic pathways; ko01110: Biosynthesis of secondary metabolites; ko01200: Carbon metabolism; ko01230: Biosynthesis of amino acids	hypothetical protein BRADI_3g18825v3 [Brachypodium distachyon]	--	A0A3B6JK65_WHEAT SubName: Full=Uncharacterized protein {ECO:0000313|EnsemblPlants:TraesCS4D02G202500.1.cds1};	--	--	PF14111.6:Domain of unknown function (DUF4283)	--	--	--
novel.19812	TRUE	FALSE	FALSE	FALSE	5.79	5.57	5.21	5.52333	1.87	2.47	1.55	1.96333	4.7	7.03	4.16	5.29667	1.83	6.39	2.17	3.46333	6A	162419868	162426044	-	--	--	K15849 bifunctional aspartate aminotransferase and glutamate/aspartate-prephenate aminotransferase [EC:2.6.1.1 2.6.1.78 2.6.1.79] | (RefSeq) uncharacterized protein LOC123045393 isoform X1 (A)	ko00350: Tyrosine metabolism; ko00360: Phenylalanine metabolism; ko00400: Phenylalanine, tyrosine and tryptophan biosynthesis; ko00950: Isoquinoline alkaloid biosynthesis; ko00960: Tropane, piperidine and pyridine alkaloid biosynthesis; ko01100: Metabolic pathways; ko01110: Biosynthesis of secondary metabolites; ko01230: Biosynthesis of amino acids	unnamed protein product [Triticum aestivum]	SWC4_ARATH RecName: Full=SWR1-complex protein 4;	A0A080YTZ6_WHEAT SubName: Full=Uncharacterized protein {ECO:0000313|EMBL:CDM86841.1};	At2g47210	GO:0035267,NuA4 histone acetyltransferase complex; GO:0005634,nucleus; GO:0000812,Swr1 complex; GO:0003677,DNA binding; GO:0003714,transcription corepressor activity; GO:0006281,DNA repair; GO:0043486,histone exchange; GO:0043968,histone H2A acetylation; GO:0043967,histone H4 acetylation; GO:0000122,negative regulation of transcription by RNA polymerase II; GO:0003674,molecular_function; GO:00036…	--	--	--	--
novel.1940	TRUE	TRUE	FALSE	FALSE	0.84	1.16	1.18	1.06	0.4	0.56	0.62	0.526667	0.92	3.41	1.53	1.95333	0.26	0.77	0.77	0.6	1B	299547526	299552241	-	--	--	K00850 6-phosphofructokinase 1 [EC:2.7.1.11] | (RefSeq) ATP-dependent 6-phosphofructokinase 2 (A)	ko00010: Glycolysis / Gluconeogenesis; ko00030: Pentose phosphate pathway; ko00051: Fructose and mannose metabolism; ko00052: Galactose metabolism; ko01100: Metabolic pathways; ko01110: Biosynthesis of secondary metabolites; ko01200: Carbon metabolism; ko01230: Biosynthesis of amino acids; ko03018: RNA degradation	PREDICTED: ATP-dependent 6-phosphofructokinase 2, partial [Oryza brachyantha]	PFKA2_ARATH RecName: Full=ATP-dependent 6-phosphofructokinase 2 {ECO:0000255|HAMAP-Rule:MF_03186}; Short=ATP-PFK 2 {ECO:0000255|HAMAP-Rule:MF_03186}; Short=Phosphofructokinase 2 {ECO:0000255|HAMAP-Rule:MF_03186}; EC=2.7.1.11 {ECO:0000255|HAMAP-Rule:MF_03186}; AltName: Full=Phosphohexokinase 2 {ECO:0000255|HAMAP-Rule:MF_03186};	A0A6G1BRU2_9ORYZ RecName: Full=ATP-dependent 6-phosphofructokinase {ECO:0000256|HAMAP-Rule:MF_03186}; Short=ATP-PFK {ECO:0000256|HAMAP-Rule:MF_03186}; Short=Phosphofructokinase {ECO:0000256|HAMAP-Rule:MF_03186}; EC=2.7.1.11 {ECO:0000256|HAMAP-Rule:MF_03186}; AltName: Full=Phosphohexokinase {ECO:0000256|HAMAP-Rule:MF_03186};	At5g47810	GO:0005737,cytoplasm; GO:0005829,cytosol; GO:0003872,6-phosphofructokinase activity; GO:0005524,ATP binding; GO:0046872,metal ion binding; GO:0006002,fructose 6-phosphate metabolic process; GO:0006096,glycolytic process; GO:0003674,molecular_function; GO:0003824,catalytic activity; GO:0008443,phosphofructokinase activity; GO:0016301,kinase activity; GO:0016740,transferase activity; GO:0016772,tra…	--	--	--	--
novel.19368	TRUE	TRUE	FALSE	FALSE	0.66	0.67	0.47	0.6	2.08	3.78	2.6	2.82	0	0.04	0.14	0.06	1.72	0.8	0.24	0.92	5D	509440935	509442360	.	--	--	K01739 cystathionine gamma-synthase [EC:2.5.1.48] | (RefSeq) probable cystathionine gamma-synthase 2 (A)	ko00270: Cysteine and methionine metabolism; ko00450: Selenocompound metabolism; ko00920: Sulfur metabolism; ko01100: Metabolic pathways; ko01110: Biosynthesis of secondary metabolites; ko01230: Biosynthesis of amino acids	hypothetical protein TRIUR3_30489 [Triticum urartu]	--	M8CQ54_AEGTA SubName: Full=Uncharacterized protein {ECO:0000313|EMBL:EMT25731.1, ECO:0000313|EnsemblPlants:EMT25731};	--	--	--	--	--	--
novel.19367	TRUE	TRUE	FALSE	FALSE	0	0	0	0	9.07	3.98	10.32	7.79	0	0.41	0.37	0.26	13.28	5.06	6.47	8.27	5D	509439078	509443804	-	--	--	K01739 cystathionine gamma-synthase [EC:2.5.1.48] | (RefSeq) probable cystathionine gamma-synthase 2 (A)	ko00270: Cysteine and methionine metabolism; ko00450: Selenocompound metabolism; ko00920: Sulfur metabolism; ko01100: Metabolic pathways; ko01110: Biosynthesis of secondary metabolites; ko01230: Biosynthesis of amino acids	Polyphenol oxidase A1, chloroplastic [Triticum urartu]	KSG1_ARATH RecName: Full=Shaggy-related protein kinase alpha {ECO:0000303|PubMed:7509023}; EC=2.7.11.1; AltName: Full=ASK-alpha {ECO:0000303|PubMed:7509023}; AltName: Full=Shaggy-related protein kinase 11 {ECO:0000303|PubMed:28575660}; Short=AtSK11 {ECO:0000303|PubMed:28575660};	A0A453M601_AEGTS SubName: Full=Uncharacterized protein {ECO:0000313|EnsemblPlants:AET5Gv21057800.3};	At3g05840	GO:0005737,cytoplasm; GO:0005829,cytosol; GO:0005524,ATP binding; GO:0004672,protein kinase activity; GO:0106310,protein serine kinase activity; GO:0004674,protein serine/threonine kinase activity; GO:0106311,protein threonine kinase activity; GO:0042538,hyperosmotic salinity response; GO:0009933,meristem structural organization; GO:1901002,positive regulation of response to salt stress; GO:00096…	--	--	--	--
novel.1834	TRUE	FALSE	TRUE	FALSE	1.22	1.41	1.34	1.32333	2.18	1.89	4.85	2.97333	0.3	1.06	0.49	0.616667	2.35	0.45	0.72	1.17333	1B	236963437	236968261	+	--	--	K14085 aldehyde dehydrogenase family 7 member A1 [EC:1.2.1.31 1.2.1.8 1.2.1.3] | (RefSeq) aldehyde dehydrogenase family 2 member C4-like (A)	ko00010: Glycolysis / Gluconeogenesis; ko00053: Ascorbate and aldarate metabolism; ko00071: Fatty acid degradation; ko00260: Glycine, serine and threonine metabolism; ko00280: Valine, leucine and isoleucine degradation; ko00310: Lysine degradation; ko00330: Arginine and proline metabolism; ko00340: Histidine metabolism; ko00380: Tryptophan metabolism; ko00410: beta-Alanine metabolism; ko00561: Gl…	uncharacterized protein LOC109744614 isoform X1 [Aegilops tauschii subsp. tauschii]	GSTT3_ARATH RecName: Full=Glutathione S-transferase T3; Short=AtGSTT3; EC=2.5.1.18; AltName: Full=GST class-theta member 3; AltName: Full=Glutathione S-transferase 10C;	A0A287S842_HORVV SubName: Full=Uncharacterized protein {ECO:0000313|EnsemblPlants:HORVU5Hr1G091570.1};	At3g15310	GO:0005737,cytoplasm; GO:0005634,nucleus; GO:0009536,plastid; GO:0004364,glutathione transferase activity; GO:0006749,glutathione metabolic process; GO:0009407,toxin catabolic process; GO:0003674,molecular_function; GO:0003824,catalytic activity; GO:0016740,transferase activity; GO:0016765,transferase activity, transferring alkyl or aryl (other than methyl) groups; GO:0006518,peptide metabolic pr…	PF04827.14:Plant transposon protein	--	--	--
novel.18056	TRUE	FALSE	TRUE	FALSE	6.88	13.19	16.16	12.0767	1.73	1.35	4.91	2.66333	1.24	0.34	1.61	1.06333	1.38	1.63	1.68	1.56333	5B	545169002	545172308	-	--	--	K00020 3-hydroxyisobutyrate dehydrogenase [EC:1.1.1.31] | (RefSeq) probable 3-hydroxyisobutyrate dehydrogenase-like 3, mitochondrial (A)	ko00280: Valine, leucine and isoleucine degradation; ko01100: Metabolic pathways	WAS/WASL-interacting protein family member 1-like [Aegilops tauschii subsp. tauschii]	--	A0A6G1ERE5_9ORYZ SubName: Full=Uncharacterized protein {ECO:0000313|EMBL:KAF0927197.1};	--	GO:0016021,integral component of membrane; GO:0051287,NAD binding; GO:0050661,NADP binding; GO:0016491,oxidoreductase activity; GO:0000166,nucleotide binding; GO:0003674,molecular_function; GO:0005488,binding; GO:0036094,small molecule binding; GO:0097159,organic cyclic compound binding; GO:1901265,nucleoside phosphate binding; GO:1901363,heterocyclic compound binding; GO:0003824,catalytic activi…	--	--	--	--
novel.167	TRUE	FALSE	TRUE	TRUE	12.21	13.11	13.64	12.9867	3.79	4.09	11.1	6.32667	0.85	0.21	0.59	0.55	1.39	0.38	1.33	1.03333	1A	45830867	45832352	+	--	--	K00020 3-hydroxyisobutyrate dehydrogenase [EC:1.1.1.31] | (RefSeq) probable 3-hydroxyisobutyrate dehydrogenase-like 2, mitochondrial (A)	ko00280: Valine, leucine and isoleucine degradation; ko01100: Metabolic pathways	probable 3-hydroxyisobutyrate dehydrogenase-like 2, mitochondrial [Aegilops tauschii subsp. tauschii]	--	A0A3B5Y689_WHEAT SubName: Full=Uncharacterized protein {ECO:0000313|EnsemblPlants:TraesCS1A02G400600.1.cds1};	--	GO:0005634,nucleus; GO:0003729,mRNA binding; GO:0051287,NAD binding; GO:0050661,NADP binding; GO:0016491,oxidoreductase activity; GO:0048024,regulation of mRNA splicing, via spliceosome; GO:0003674,molecular_function; GO:0003676,nucleic acid binding; GO:0003723,RNA binding; GO:0005488,binding; GO:0097159,organic cyclic compound binding; GO:1901363,heterocyclic compound binding; GO:0000166,nucleot…	--	--	--	--
novel.1667	TRUE	FALSE	FALSE	FALSE	3.73	3.04	3.2	3.32333	1.27	1.58	2.16	1.67	3.59	3.12	3.24	3.31667	3.37	1.84	1.58	2.26333	1B	156810884	156812860	+	--	--	K06001 tryptophan synthase beta chain [EC:4.2.1.20] | (RefSeq) uncharacterized protein LOC109767967 isoform X1 (A)	ko00260: Glycine, serine and threonine metabolism; ko00400: Phenylalanine, tyrosine and tryptophan biosynthesis; ko01100: Metabolic pathways; ko01110: Biosynthesis of secondary metabolites; ko01230: Biosynthesis of amino acids	Tryptophan synthase beta chain 2 [Triticum urartu]	--	N1QXX5_AEGTA SubName: Full=Tryptophan synthase beta chain 2 {ECO:0000313|EMBL:EMT13264.1, ECO:0000313|EnsemblPlants:EMT13264};	At5g38530	GO:0016021,integral component of membrane; GO:0005575,cellular_component; GO:0016020,membrane; GO:0031224,intrinsic component of membrane; GO:0110165,cellular anatomical entity	--	--	--	--
novel.1556	TRUE	FALSE	FALSE	FALSE	0.29	0.28	0.17	0.246667	1.22	0.46	2.2	1.29333	1.03	0.28	0.62	0.643333	0.79	0.75	0.93	0.823333	1B	116250845	116254768	+	--	--	K00873 pyruvate kinase [EC:2.7.1.40] | (RefSeq) pyruvate kinase 1, cytosolic (A)	ko00010: Glycolysis / Gluconeogenesis; ko00620: Pyruvate metabolism; ko01100: Metabolic pathways; ko01110: Biosynthesis of secondary metabolites; ko01200: Carbon metabolism; ko01230: Biosynthesis of amino acids	pyruvate kinase-like, partial [Deschampsia antarctica]	KPYC1_ORYSI RecName: Full=Pyruvate kinase 1, cytosolic {ECO:0000305}; Short=OsPK1 {ECO:0000305}; EC=2.7.1.40 {ECO:0000305};	A0A2P5WN54_GOSBA RecName: Full=Pyruvate kinase {ECO:0000256|ARBA:ARBA00012142, ECO:0000256|RuleBase:RU000504}; EC=2.7.1.40 {ECO:0000256|ARBA:ARBA00012142, ECO:0000256|RuleBase:RU000504};	At3g52990	GO:0005829,cytosol; GO:0005524,ATP binding; GO:0016301,kinase activity; GO:0000287,magnesium ion binding; GO:0030955,potassium ion binding; GO:0004743,pyruvate kinase activity; GO:0000166,nucleotide binding; GO:0003674,molecular_function; GO:0005488,binding; GO:0017076,purine nucleotide binding; GO:0030554,adenyl nucleotide binding; GO:0032553,ribonucleotide binding; GO:0032555,purine ribonucleot…	PF00224.21:Pyruvate kinase, barrel domain	--	--	--
novel.14473	TRUE	FALSE	FALSE	FALSE	0.21	0.25	0.54	0.333333	2.48	1.36	4.95	2.93	1.47	0.32	0.72	0.836667	1.81	1.4	0.98	1.39667	4B	600366672	600370111	-	--	--	K00827 alanine-glyoxylate transaminase / (R)-3-amino-2-methylpropionate-pyruvate transaminase [EC:2.6.1.44 2.6.1.40] | (RefSeq) alanine--glyoxylate aminotransferase 2 homolog 1, mitochondrial isoform X1 (A)	ko00250: Alanine, aspartate and glutamate metabolism; ko00260: Glycine, serine and threonine metabolism; ko00270: Cysteine and methionine metabolism; ko00280: Valine, leucine and isoleucine degradation; ko01100: Metabolic pathways; ko01110: Biosynthesis of secondary metabolites	predicted protein [Hordeum vulgare subsp. vulgare]	ACD11_ARATH RecName: Full=Accelerated cell death 11 {ECO:0000303|PubMed:11850411}; AltName: Full=Ceramide-1-phosphate transfer protein ACD11 {ECO:0000305}; AltName: Full=Glycolipid transfer protein domain-containing protein ACD11 {ECO:0000305};	A0A453LZV7_AEGTS RecName: Full=GLTP domain-containing protein {ECO:0000259|Pfam:PF08718};	At2g34690	GO:0005829,cytosol; GO:0016020,membrane; GO:1902387,ceramide 1-phosphate binding; GO:1902388,ceramide 1-phosphate transfer activity; GO:0140338,sphingomyelin transfer activity; GO:0008219,cell death; GO:0035627,ceramide transport; GO:0042742,defense response to bacterium; GO:0120009,intermembrane lipid transfer; GO:0009751,response to salicylic acid; GO:0003674,molecular_function; GO:0005488,bind…	PF08718.11:Glycolipid transfer protein (GLTP)	--	--	--
novel.14408	TRUE	FALSE	FALSE	FALSE	0.22	0.31	0.19	0.24	0.72	0.62	1.82	1.05333	0.03	0.27	0.11	0.136667	0.38	0.45	0.28	0.37	4B	565733617	565740048	+	--	--	K01681 aconitate hydratase [EC:4.2.1.3] | (RefSeq) putative aconitate hydratase, cytoplasmic (A)	ko00020: Citrate cycle (TCA cycle); ko00630: Glyoxylate and dicarboxylate metabolism; ko01100: Metabolic pathways; ko01110: Biosynthesis of secondary metabolites; ko01200: Carbon metabolism; ko01210: 2-Oxocarboxylic acid metabolism; ko01230: Biosynthesis of amino acids	uncharacterized protein LOC109746885 [Aegilops tauschii subsp. tauschii]	--	A0A446QKU7_TRITD RecName: Full=F-box domain-containing protein {ECO:0000259|Pfam:PF00646};	--	--	PF00646.33:F-box domain	--	--	--
novel.14062	TRUE	FALSE	TRUE	TRUE	4.41	3.6	2.82	3.61	1.27	1.48	2.11	1.62	0	0	0	0	0	0	0	0	4B	373348375	373353978	+	--	--	K00134 glyceraldehyde 3-phosphate dehydrogenase (phosphorylating) [EC:1.2.1.12] | (RefSeq) glyceraldehyde-3-phosphate dehydrogenase 2, cytosolic-like isoform X1 (A)	ko00010: Glycolysis / Gluconeogenesis; ko00710: Carbon fixation in photosynthetic organisms; ko01100: Metabolic pathways; ko01110: Biosynthesis of secondary metabolites; ko01200: Carbon metabolism; ko01230: Biosynthesis of amino acids	Glyceraldehyde-3-phosphate dehydrogenase, cytosolic 3 [Triticum urartu]	G3PC2_HORVU RecName: Full=Glyceraldehyde-3-phosphate dehydrogenase 2, cytosolic; EC=1.2.1.12; Flags: Fragment;	A0A446WDI8_TRITD RecName: Full=Glyceraldehyde-3-phosphate dehydrogenase {ECO:0000256|RuleBase:RU361160}; EC=1.2.1.- {ECO:0000256|RuleBase:RU361160};	At1g13440	GO:0005737,cytoplasm; GO:0004365,glyceraldehyde-3-phosphate dehydrogenase (NAD+) (phosphorylating) activity; GO:0051287,NAD binding; GO:0050661,NADP binding; GO:0006006,glucose metabolic process; GO:0006096,glycolytic process; GO:0003674,molecular_function; GO:0003824,catalytic activity; GO:0016491,oxidoreductase activity; GO:0016620,oxidoreductase activity, acting on the aldehyde or oxo group of…	PF02800.20:Glyceraldehyde 3-phosphate dehydrogenase, C-terminal domain	--	--	--
novel.13690	TRUE	TRUE	FALSE	FALSE	1.46	2.31	2.3	2.02333	11.15	11.88	8.78	10.6033	2.93	0.99	3.28	2.4	6.92	13.57	8.3	9.59667	4B	182293417	182297492	-	--	--	K14085 aldehyde dehydrogenase family 7 member A1 [EC:1.2.1.31 1.2.1.8 1.2.1.3] | (RefSeq) aldehyde dehydrogenase family 2 member C4-like (A)	ko00010: Glycolysis / Gluconeogenesis; ko00053: Ascorbate and aldarate metabolism; ko00071: Fatty acid degradation; ko00260: Glycine, serine and threonine metabolism; ko00280: Valine, leucine and isoleucine degradation; ko00310: Lysine degradation; ko00330: Arginine and proline metabolism; ko00340: Histidine metabolism; ko00380: Tryptophan metabolism; ko00410: beta-Alanine metabolism; ko00561: Gl…	putative glucuronosyltransferase GUT1 [Triticum urartu]	--	A0A453RDU0_AEGTS SubName: Full=Uncharacterized protein {ECO:0000313|EnsemblPlants:AET7Gv20551700.1};	At1g24370_1	GO:0016788,hydrolase activity, acting on ester bonds; GO:0003674,molecular_function; GO:0003824,catalytic activity; GO:0016787,hydrolase activity	--	--	--	--
novel.12731	TRUE	FALSE	FALSE	FALSE	1.24	0.71	1.01	0.986667	2.08	1.66	6.17	3.30333	0.54	0.61	1.14	0.763333	3.26	0.27	1.27	1.6	4A	502359999	502364749	-	--	--	K14085 aldehyde dehydrogenase family 7 member A1 [EC:1.2.1.31 1.2.1.8 1.2.1.3] | (RefSeq) aldehyde dehydrogenase family 2 member C4-like (A)	ko00010: Glycolysis / Gluconeogenesis; ko00053: Ascorbate and aldarate metabolism; ko00071: Fatty acid degradation; ko00260: Glycine, serine and threonine metabolism; ko00280: Valine, leucine and isoleucine degradation; ko00310: Lysine degradation; ko00330: Arginine and proline metabolism; ko00340: Histidine metabolism; ko00380: Tryptophan metabolism; ko00410: beta-Alanine metabolism; ko00561: Gl…	uncharacterized protein LOC8066251 [Sorghum bicolor]	GSTT3_ARATH RecName: Full=Glutathione S-transferase T3; Short=AtGSTT3; EC=2.5.1.18; AltName: Full=GST class-theta member 3; AltName: Full=Glutathione S-transferase 10C;	A0A287NJD8_HORVV SubName: Full=Uncharacterized protein {ECO:0000313|EnsemblPlants:HORVU4Hr1G023210.5};	At3g15310	GO:0005737,cytoplasm; GO:0005634,nucleus; GO:0009536,plastid; GO:0004364,glutathione transferase activity; GO:0006749,glutathione metabolic process; GO:0009407,toxin catabolic process; GO:0003674,molecular_function; GO:0003824,catalytic activity; GO:0016740,transferase activity; GO:0016765,transferase activity, transferring alkyl or aryl (other than methyl) groups; GO:0006518,peptide metabolic pr…	PF04827.14:Plant transposon protein	--	--	--
novel.10562	TRUE	TRUE	FALSE	FALSE	4.48	3.01	3.09	3.52667	1.21	2.22	0.3	1.24333	5.58	4.4	4.18	4.72	2.06	3.13	1.3	2.16333	3B	684672037	684674027	+	--	--	K06001 tryptophan synthase beta chain [EC:4.2.1.20] | (RefSeq) uncharacterized protein LOC109767967 isoform X1 (A)	ko00260: Glycine, serine and threonine metabolism; ko00400: Phenylalanine, tyrosine and tryptophan biosynthesis; ko01100: Metabolic pathways; ko01110: Biosynthesis of secondary metabolites; ko01230: Biosynthesis of amino acids	Tryptophan synthase beta chain 2 [Triticum urartu]	--	N1QXX5_AEGTA SubName: Full=Tryptophan synthase beta chain 2 {ECO:0000313|EMBL:EMT13264.1, ECO:0000313|EnsemblPlants:EMT13264};	At5g38530	GO:0016021,integral component of membrane; GO:0005575,cellular_component; GO:0016020,membrane; GO:0031224,intrinsic component of membrane; GO:0110165,cellular anatomical entity	--	--	--	--
novel.10370	TRUE	TRUE	FALSE	FALSE	11.08	16.61	18.21	15.3	38.77	43.52	61.93	48.0733	15.64	20.05	15.2	16.9633	43.37	54.98	49.82	49.39	3B	561702779	561705807	-	--	--	K00020 3-hydroxyisobutyrate dehydrogenase [EC:1.1.1.31] | (RefSeq) probable 3-hydroxyisobutyrate dehydrogenase-like 3, mitochondrial (A)	ko00280: Valine, leucine and isoleucine degradation; ko01100: Metabolic pathways	DIMBOA UDP-glucosyltransferase BX8-like [Aegilops tauschii subsp. tauschii]	--	A0A453MAZ9_AEGTS SubName: Full=Uncharacterized protein {ECO:0000313|EnsemblPlants:AET5Gv21120900.2};	--	GO:0008194,UDP-glycosyltransferase activity; GO:0003674,molecular_function; GO:0003824,catalytic activity; GO:0016740,transferase activity; GO:0016757,transferase activity, transferring glycosyl groups	--	--	--	--
TraesCSU02G164100	FALSE	FALSE	FALSE	TRUE	0.05	0.05	0.3	0.133333	0.02	0.08	0.04	0.0466667	0.43	0.65	0.73	0.603333	0.65	1.46	0.99	1.03333	Un	237451276	237453569	+	TraesCSU02G164100	--	K01681 aconitate hydratase [EC:4.2.1.3] | (RefSeq) putative aconitate hydratase, cytoplasmic (A)	ko00020: Citrate cycle (TCA cycle); ko00630: Glyoxylate and dicarboxylate metabolism; ko01100: Metabolic pathways; ko01110: Biosynthesis of secondary metabolites; ko01200: Carbon metabolism; ko01210: 2-Oxocarboxylic acid metabolism; ko01230: Biosynthesis of amino acids	unnamed protein product [Triticum aestivum]	--	A0A077RTS5_WHEAT SubName: Full=Uncharacterized protein {ECO:0000313|EMBL:CDM80341.1, ECO:0000313|EnsemblPlants:TraesCSU02G159400.1};	--	--	PF07734.13:F-box associated	--	--	--
TraesCSU02G159400	FALSE	TRUE	TRUE	TRUE	0.01	0	0	0.00333333	0.03	0.01	0.03	0.0233333	3.44	6.23	4.13	4.6	12.64	7.91	10.35	10.3	Un	225570254	225573457	-	TraesCSU02G159400	--	K01681 aconitate hydratase [EC:4.2.1.3] | (RefSeq) putative aconitate hydratase, cytoplasmic (A)	ko00020: Citrate cycle (TCA cycle); ko00630: Glyoxylate and dicarboxylate metabolism; ko01100: Metabolic pathways; ko01110: Biosynthesis of secondary metabolites; ko01200: Carbon metabolism; ko01210: 2-Oxocarboxylic acid metabolism; ko01230: Biosynthesis of amino acids	unnamed protein product [Triticum aestivum]	--	A0A077RTS5_WHEAT SubName: Full=Uncharacterized protein {ECO:0000313|EMBL:CDM80341.1, ECO:0000313|EnsemblPlants:TraesCSU02G159400.1};	--	--	PF07734.13:F-box associated	--	--	--
TraesCSU02G044300	FALSE	TRUE	TRUE	TRUE	0.12	0.49	0.71	0.44	0.36	0.59	1.94	0.963333	2.6	5.72	4.37	4.23	10.28	7.19	7.98	8.48333	Un	35321549	35324285	-	TraesCSU02G044300	--	K01681 aconitate hydratase [EC:4.2.1.3] | (RefSeq) putative aconitate hydratase, cytoplasmic (A)	ko00020: Citrate cycle (TCA cycle); ko00630: Glyoxylate and dicarboxylate metabolism; ko01100: Metabolic pathways; ko01110: Biosynthesis of secondary metabolites; ko01200: Carbon metabolism; ko01210: 2-Oxocarboxylic acid metabolism; ko01230: Biosynthesis of amino acids	uncharacterized protein LOC109780091 [Aegilops tauschii subsp. tauschii]	--	A0A3B6U9Y3_WHEAT RecName: Full=F-box domain-containing protein {ECO:0000259|SMART:SM00256};	--	--	PF12937.7:F-box-like	--	--	--
TraesCSU02G043000	FALSE	TRUE	TRUE	TRUE	0	0	0	0	0	0	0	0	5.11	6.72	4.64	5.49	1.91	2.88	2.13	2.30667	Un	34660550	34663263	-	TraesCSU02G043000	--	K01681 aconitate hydratase [EC:4.2.1.3] | (RefSeq) putative aconitate hydratase, cytoplasmic (A)	ko00020: Citrate cycle (TCA cycle); ko00630: Glyoxylate and dicarboxylate metabolism; ko01100: Metabolic pathways; ko01110: Biosynthesis of secondary metabolites; ko01200: Carbon metabolism; ko01210: 2-Oxocarboxylic acid metabolism; ko01230: Biosynthesis of amino acids	unnamed protein product [Triticum aestivum]	--	A0A077S4X2_WHEAT SubName: Full=Uncharacterized protein {ECO:0000313|EMBL:CDM86554.1, ECO:0000313|EnsemblPlants:TraesCSU02G043000.1};	--	--	PF07734.13:F-box associated	--	--	--
TraesCS7D02G208100	FALSE	TRUE	FALSE	FALSE	1.96	1.17	1.63	1.58667	0.92	0.99	1.27	1.06	1.49	3.31	1.73	2.17667	0.71	1.57	0.65	0.976667	7D	165650796	165665235	+	TraesCS7D02G208100	--	K00020 3-hydroxyisobutyrate dehydrogenase [EC:1.1.1.31] | (RefSeq) uncharacterized protein LOC111987869 (A)	ko00280: Valine, leucine and isoleucine degradation; ko01100: Metabolic pathways	uncharacterized protein LOC109732724 [Aegilops tauschii subsp. tauschii]	3HIDH_ARATH RecName: Full=Probable 3-hydroxyisobutyrate dehydrogenase, mitochondrial; Short=HIBADH; EC=1.1.1.31; Flags: Precursor;	A0A2P1E8U0_WHEAT SubName: Full=Fructose-1,6-bisphosphate aldolase 21 {ECO:0000313|EMBL:AVL25153.1};	At1g18270_1	GO:0005739,mitochondrion; GO:0008442,3-hydroxyisobutyrate dehydrogenase activity; GO:0051287,NAD binding; GO:0050661,NADP binding; GO:0016616,oxidoreductase activity, acting on the CH-OH group of donors, NAD or NADP as acceptor; GO:0043621,protein self-association; GO:0009083,branched-chain amino acid catabolic process; GO:0006551,leucine metabolic process; GO:0006574,valine catabolic process; GO…	PF01116.20:Fructose-bisphosphate aldolase class-II	--	--	--
TraesCS7B02G375300	FALSE	FALSE	TRUE	TRUE	1.46	1.15	1.51	1.37333	0.94	1.1	4.46	2.16667	0	0	0	0	0	0	0	0	7B	640714322	640717472	+	TraesCS7B02G375300	Phosphoglycerate kinase [Source:UniProtKB/TrEMBL%3BAcc:A0A1D6C5J1]	K00927 phosphoglycerate kinase [EC:2.7.2.3] | (RefSeq) phosphoglycerate kinase, cytosolic-like (A)	ko00010: Glycolysis / Gluconeogenesis; ko00710: Carbon fixation in photosynthetic organisms; ko01100: Metabolic pathways; ko01110: Biosynthesis of secondary metabolites; ko01200: Carbon metabolism; ko01230: Biosynthesis of amino acids	phosphoglycerate kinase, cytosolic-like [Aegilops tauschii subsp. tauschii]	PGKY_WHEAT RecName: Full=Phosphoglycerate kinase, cytosolic; EC=2.7.2.3;	A0A3B6SRA3_WHEAT RecName: Full=Phosphoglycerate kinase {ECO:0000256|ARBA:ARBA00013061, ECO:0000256|RuleBase:RU000532}; EC=2.7.2.3 {ECO:0000256|ARBA:ARBA00013061, ECO:0000256|RuleBase:RU000532};	At1g79550	GO:0005829,cytosol; GO:0043531,ADP binding; GO:0005524,ATP binding; GO:0004618,phosphoglycerate kinase activity; GO:0006094,gluconeogenesis; GO:0006096,glycolytic process; GO:0000166,nucleotide binding; GO:0003674,molecular_function; GO:0005488,binding; GO:0017076,purine nucleotide binding; GO:0030554,adenyl nucleotide binding; GO:0032553,ribonucleotide binding; GO:0032555,purine ribonucleotide b…	PF00162.19:Phosphoglycerate kinase	--	--	--
TraesCS7B02G074400	FALSE	TRUE	FALSE	FALSE	3.74	2.9	4.03	3.55667	6.52	7.19	7.94	7.21667	1.93	2.96	2.98	2.62333	6.9	3.48	6.15	5.51	7B	84209191	84215946	+	TraesCS7B02G074400	Aminoacylase [Source:UniProtKB/TrEMBL%3BAcc:A0A1D6D9D4]	K14677 aminoacylase [EC:3.5.1.14] | (RefSeq) aminoacylase-1-like (A)	ko00220: Arginine biosynthesis; ko01100: Metabolic pathways; ko01110: Biosynthesis of secondary metabolites; ko01210: 2-Oxocarboxylic acid metabolism; ko01230: Biosynthesis of amino acids	aminoacylase-1-like [Aegilops tauschii subsp. tauschii]	--	A0A3B6SF48_WHEAT RecName: Full=N-acyl-L-amino-acid amidohydrolase {ECO:0000256|ARBA:ARBA00019885}; EC=3.5.1.14 {ECO:0000256|ARBA:ARBA00011913};	At1g44180	GO:0005737,cytoplasm; GO:0004046,aminoacylase activity; GO:0006520,cellular amino acid metabolic process; GO:0003674,molecular_function; GO:0003824,catalytic activity; GO:0016787,hydrolase activity; GO:0016810,hydrolase activity, acting on carbon-nitrogen (but not peptide) bonds; GO:0016811,hydrolase activity, acting on carbon-nitrogen (but not peptide) bonds, in linear amides; GO:0006082,organic…	PF01546.28:Peptidase family M20/M25/M40	--	--	--
TraesCS7A02G392800	FALSE	FALSE	FALSE	TRUE	5.62	5.75	7.11	6.16	8.05	9.78	18.24	12.0233	3.65	2.57	5.21	3.81	5	4.57	4.28	4.61667	7A	570115839	570118722	+	TraesCS7A02G392800	--	K06001 tryptophan synthase beta chain [EC:4.2.1.20] | (RefSeq) tryptophan synthase beta chain 2-like isoform X1 (A)	ko00260: Glycine, serine and threonine metabolism; ko00400: Phenylalanine, tyrosine and tryptophan biosynthesis; ko01100: Metabolic pathways; ko01110: Biosynthesis of secondary metabolites; ko01230: Biosynthesis of amino acids	uncharacterized protein LOC109767967 isoform X1 [Aegilops tauschii subsp. tauschii]	TRPB1_ARATH RecName: Full=Tryptophan synthase beta chain 1, chloroplastic; EC=4.2.1.20; Flags: Precursor;	A0A3B6RN29_WHEAT RecName: Full=PALP domain-containing protein {ECO:0000259|Pfam:PF00291};	At5g38530	GO:0009507,chloroplast; GO:0009570,chloroplast stroma; GO:0005737,cytoplasm; GO:0005886,plasma membrane; GO:0019904,protein domain specific binding; GO:0004834,tryptophan synthase activity; GO:0009684,indoleacetic acid biosynthetic process; GO:0006979,response to oxidative stress; GO:0000162,tryptophan biosynthetic process; GO:0003674,molecular_function; GO:0005488,binding; GO:0005515,protein bin…	PF00291.25:Pyridoxal-phosphate dependent enzyme	--	--	--
TraesCS7A02G205200	FALSE	TRUE	FALSE	FALSE	1.64	1.24	1.61	1.49667	0.85	0.89	0.92	0.886667	2.24	4.65	2.06	2.98333	1.33	1.3	0.94	1.19	7A	167253432	167272018	+	TraesCS7A02G205200	--	K00020 3-hydroxyisobutyrate dehydrogenase [EC:1.1.1.31] | (RefSeq) uncharacterized protein LOC111987869 (A)	ko00280: Valine, leucine and isoleucine degradation; ko01100: Metabolic pathways	uncharacterized protein LOC109732724 [Aegilops tauschii subsp. tauschii]	3HIDH_ARATH RecName: Full=Probable 3-hydroxyisobutyrate dehydrogenase, mitochondrial; Short=HIBADH; EC=1.1.1.31; Flags: Precursor;	A0A3B6RGC1_WHEAT SubName: Full=Uncharacterized protein {ECO:0000313|EnsemblPlants:TraesCS7A02G205200.2};	At1g18270_1	GO:0005739,mitochondrion; GO:0008442,3-hydroxyisobutyrate dehydrogenase activity; GO:0051287,NAD binding; GO:0050661,NADP binding; GO:0016616,oxidoreductase activity, acting on the CH-OH group of donors, NAD or NADP as acceptor; GO:0043621,protein self-association; GO:0009083,branched-chain amino acid catabolic process; GO:0006551,leucine metabolic process; GO:0006574,valine catabolic process; GO…	PF01116.20:Fructose-bisphosphate aldolase class-II	--	--	--
TraesCS7A02G184600	FALSE	FALSE	TRUE	FALSE	0.72	0.64	0.47	0.61	0.36	0.47	0.07	0.3	1.15	4.1	1.51	2.25333	0.59	1.38	1.47	1.14667	7A	138957412	138960529	-	TraesCS7A02G184600	--	K00891 shikimate kinase [EC:2.7.1.71] | (RefSeq) shikimate kinase 2, chloroplastic-like (A)	ko00400: Phenylalanine, tyrosine and tryptophan biosynthesis; ko01100: Metabolic pathways; ko01110: Biosynthesis of secondary metabolites; ko01230: Biosynthesis of amino acids	shikimate kinase 2, chloroplastic-like [Aegilops tauschii subsp. tauschii]	SK2_ORYSJ RecName: Full=Shikimate kinase 2, chloroplastic; Short=OsSK2; EC=2.7.1.71; Flags: Precursor;	A0A446X7I9_TRITD RecName: Full=Shikimate kinase {ECO:0000256|ARBA:ARBA00012154}; EC=2.7.1.71 {ECO:0000256|ARBA:ARBA00012154};	At2g21940	GO:0009507,chloroplast; GO:0009536,plastid; GO:0005524,ATP binding; GO:0046872,metal ion binding; GO:0004765,shikimate kinase activity; GO:0009073,aromatic amino acid family biosynthetic process; GO:0008652,cellular amino acid biosynthetic process; GO:0009423,chorismate biosynthetic process; GO:0019632,shikimate metabolic process; GO:0000166,nucleotide binding; GO:0003674,molecular_function; GO:0…	PF01202.22:Shikimate kinase	--	--	--
TraesCS7A02G179500	FALSE	FALSE	TRUE	FALSE	0.91	0.73	0.58	0.74	0.49	0.47	0	0.32	0	0.14	0.08	0.0733333	0.97	0.06	0.06	0.363333	7A	134024822	134031920	+	TraesCS7A02G179500	--	K01649 2-isopropylmalate synthase [EC:2.3.3.13] | (RefSeq) 2-isopropylmalate synthase 2, chloroplastic-like isoform X1 (A)	ko00290: Valine, leucine and isoleucine biosynthesis; ko00620: Pyruvate metabolism; ko01100: Metabolic pathways; ko01110: Biosynthesis of secondary metabolites; ko01210: 2-Oxocarboxylic acid metabolism; ko01230: Biosynthesis of amino acids	predicted protein [Hordeum vulgare subsp. vulgare]	LEU12_ARATH RecName: Full=2-isopropylmalate synthase 2, chloroplastic; EC=2.3.3.13; AltName: Full=2-isopropylmalate synthase 1; AltName: Full=Methylthioalkylmalate synthase-like 3; Flags: Precursor;	A0A3B6RFP5_WHEAT RecName: Full=Pyruvate carboxyltransferase domain-containing protein {ECO:0000259|PROSITE:PS50991};	At1g74040	GO:0009507,chloroplast; GO:0009941,chloroplast envelope; GO:0003852,2-isopropylmalate synthase activity; GO:0016829,lyase activity; GO:0009082,branched-chain amino acid biosynthetic process; GO:0009098,leucine biosynthetic process; GO:0003674,molecular_function; GO:0003824,catalytic activity; GO:0016740,transferase activity; GO:0016746,transferase activity, transferring acyl groups; GO:0046912,tr…	PF00682.19:HMGL-like	--	--	--
TraesCS7A02G102800	FALSE	FALSE	TRUE	TRUE	0.03	0.02	0	0.0166667	0	0.09	0	0.03	2.86	3.91	4.07	3.61333	1.5	2.99	1.44	1.97667	7A	63110427	63113412	+	TraesCS7A02G102800	--	K01738 cysteine synthase [EC:2.5.1.47] | (RefSeq) cysteine synthase-like (A)	ko00270: Cysteine and methionine metabolism; ko00920: Sulfur metabolism; ko01100: Metabolic pathways; ko01110: Biosynthesis of secondary metabolites; ko01200: Carbon metabolism; ko01230: Biosynthesis of amino acids	cysteine synthase-like [Aegilops tauschii subsp. tauschii]	CYSKP_SOLTU RecName: Full=Cysteine synthase, chloroplastic/chromoplastic; EC=2.5.1.47; AltName: Full=CSase B; Short=CS-B; AltName: Full=O-acetylserine (thiol)-lyase; AltName: Full=O-acetylserine sulfhydrylase; AltName: Full=OAS-TL B; Flags: Precursor;	A0A3B6R927_WHEAT RecName: Full=PALP domain-containing protein {ECO:0000259|Pfam:PF00291};	At2g43750	GO:0009570,chloroplast stroma; GO:0009509,chromoplast; GO:0005737,cytoplasm; GO:0004124,cysteine synthase activity; GO:0030170,pyridoxal phosphate binding; GO:0006535,cysteine biosynthetic process from serine; GO:0009567,double fertilization forming a zygote and endosperm; GO:0009860,pollen tube growth; GO:0003674,molecular_function; GO:0003824,catalytic activity; GO:0016740,transferase activity;…	PF00291.25:Pyridoxal-phosphate dependent enzyme	--	--	--
TraesCS6D02G272400	FALSE	FALSE	TRUE	TRUE	14.46	21.37	20.92	18.9167	19.46	19.27	27.78	22.17	8.92	5.07	10.09	8.02667	12.38	10.01	12.92	11.77	6D	381187434	381191331	-	TraesCS6D02G272400	--	K00128 aldehyde dehydrogenase (NAD+) [EC:1.2.1.3] | (RefSeq) aldehyde dehydrogenase family 2 member B7, mitochondrial-like (A)	ko00010: Glycolysis / Gluconeogenesis; ko00053: Ascorbate and aldarate metabolism; ko00071: Fatty acid degradation; ko00280: Valine, leucine and isoleucine degradation; ko00310: Lysine degradation; ko00330: Arginine and proline metabolism; ko00340: Histidine metabolism; ko00380: Tryptophan metabolism; ko00410: beta-Alanine metabolism; ko00561: Glycerolipid metabolism; ko00620: Pyruvate metabolism…	aldehyde dehydrogenase family 2 member B7, mitochondrial-like [Aegilops tauschii subsp. tauschii]	BALDH_ANTMA RecName: Full=Benzaldehyde dehydrogenase, mitochondrial {ECO:0000303|PubMed:19292760}; EC=1.2.1.28 {ECO:0000269|PubMed:19292760}; AltName: Full=2-phenylacetaldehyde dehydrogenase {ECO:0000305}; EC=1.2.1.39 {ECO:0000269|PubMed:19292760}; AltName: Full=Acetaldehyde dehydrogenase {ECO:0000305}; EC=1.2.1.3 {ECO:0000269|PubMed:19292760}; Flags: Precursor;	A0A452XGJ4_AEGTS RecName: Full=Aldedh domain-containing protein {ECO:0000259|Pfam:PF00171};	At1g23800	GO:0005739,mitochondrion; GO:0008774,acetaldehyde dehydrogenase (acetylating) activity; GO:0004029,aldehyde dehydrogenase (NAD+) activity; GO:0018479,benzaldehyde dehydrogenase (NAD+) activity; GO:0043878,glyceraldehyde-3-phosphate dehydrogenase (NAD+) (non-phosphorylating) activity; GO:0008957,phenylacetaldehyde dehydrogenase activity; GO:0007623,circadian rhythm; GO:0010597,green leaf volatile …	PF00171.22:Aldehyde dehydrogenase family	--	--	--
TraesCS6D02G225800	FALSE	TRUE	FALSE	FALSE	11.74	10.81	8.33	10.2933	17.08	20.25	11.68	16.3367	7.8	10.76	7.6	8.72	18.56	17.26	17.16	17.66	6D	317478187	317479496	-	TraesCS6D02G225800	--	K01704 3-isopropylmalate/(R)-2-methylmalate dehydratase small subunit [EC:4.2.1.33 4.2.1.35] | (RefSeq) 3-isopropylmalate dehydratase small subunit 3-like (A)	ko00290: Valine, leucine and isoleucine biosynthesis; ko00660: C5-Branched dibasic acid metabolism; ko01100: Metabolic pathways; ko01110: Biosynthesis of secondary metabolites; ko01210: 2-Oxocarboxylic acid metabolism; ko01230: Biosynthesis of amino acids	predicted protein, partial [Hordeum vulgare subsp. vulgare]	LEUD3_ARATH RecName: Full=3-isopropylmalate dehydratase small subunit 1 {ECO:0000305}; EC=4.2.1.33 {ECO:0000269|PubMed:19597944}; AltName: Full=AtLEUD3 {ECO:0000303|PubMed:20663849}; AltName: Full=Isopropylmalate isomerase small subunit 1 {ECO:0000303|PubMed:19597944}; Short=IPMI SSU1 {ECO:0000303|PubMed:19597944}; Flags: Precursor;	F2DE08_HORVV SubName: Full=Predicted protein {ECO:0000313|EMBL:BAJ93329.1}; Flags: Fragment;	At2g43090	GO:0009507,chloroplast; GO:0009570,chloroplast stroma; GO:0009536,plastid; GO:0003861,3-isopropylmalate dehydratase activity; GO:0009082,branched-chain amino acid biosynthetic process; GO:0009658,chloroplast organization; GO:0048229,gametophyte development; GO:0019761,glucosinolate biosynthetic process; GO:0009098,leucine biosynthetic process; GO:0003674,molecular_function; GO:0003824,catalytic a…	PF00694.19:Aconitase C-terminal domain	--	--	--
TraesCS6D02G063600	FALSE	TRUE	FALSE	FALSE	0.78	1.3	0.52	0.866667	0.31	0.49	0.68	0.493333	0.24	1.84	1.34	1.14	0.17	0.17	0.21	0.183333	6D	29932677	29937544	+	TraesCS6D02G063600	--	K01681 aconitate hydratase [EC:4.2.1.3] | (RefSeq) putative aconitate hydratase, cytoplasmic (A)	ko00020: Citrate cycle (TCA cycle); ko00630: Glyoxylate and dicarboxylate metabolism; ko01100: Metabolic pathways; ko01110: Biosynthesis of secondary metabolites; ko01200: Carbon metabolism; ko01210: 2-Oxocarboxylic acid metabolism; ko01230: Biosynthesis of amino acids	uncharacterized protein LOC109737533, partial [Aegilops tauschii subsp. tauschii]	--	A0A446V3D0_TRITD SubName: Full=Uncharacterized protein {ECO:0000313|EMBL:VAI42394.1};	--	--	--	--	--	--
TraesCS6B02G440200	FALSE	FALSE	FALSE	TRUE	15.32	15.94	18.33	16.53	11.71	11.04	24.57	15.7733	8.99	15.16	9.14	11.0967	5.2	9.31	7.21	7.24	6B	705377867	705385342	+	TraesCS6B02G440200	Aconitate hydratase [Source:UniProtKB/TrEMBL%3BAcc:A0A1D6AQV8]	K01681 aconitate hydratase [EC:4.2.1.3] | (RefSeq) putative aconitate hydratase, cytoplasmic (A)	ko00020: Citrate cycle (TCA cycle); ko00630: Glyoxylate and dicarboxylate metabolism; ko01100: Metabolic pathways; ko01110: Biosynthesis of secondary metabolites; ko01200: Carbon metabolism; ko01210: 2-Oxocarboxylic acid metabolism; ko01230: Biosynthesis of amino acids	putative aconitate hydratase, cytoplasmic [Aegilops tauschii subsp. tauschii]	ACOC_ORYSJ RecName: Full=Putative aconitate hydratase, cytoplasmic; Short=Aconitase; EC=4.2.1.3; AltName: Full=Citrate hydro-lyase;	A0A3B6PT84_WHEAT RecName: Full=Aconitate hydratase {ECO:0000256|RuleBase:RU361275}; Short=Aconitase {ECO:0000256|RuleBase:RU361275}; EC=4.2.1.3 {ECO:0000256|RuleBase:RU361275};	At2g05710	GO:0005829,cytosol; GO:0005739,mitochondrion; GO:0051539,4 iron, 4 sulfur cluster binding; GO:0003994,aconitate hydratase activity; GO:0047780,citrate dehydratase activity; GO:0046872,metal ion binding; GO:0006101,citrate metabolic process; GO:0006097,glyoxylate cycle; GO:0006099,tricarboxylic acid cycle; GO:0003674,molecular_function; GO:0005488,binding; GO:0051536,iron-sulfur cluster binding; G…	PF00330.20:Aconitase family (aconitate hydratase)	--	--	--
TraesCS6B02G393600	FALSE	FALSE	TRUE	FALSE	0.78	0.49	0.71	0.66	0.66	1.07	1.7	1.14333	3	6.08	2.96	4.01333	3.09	2.33	2.51	2.64333	6B	668432728	668437537	+	TraesCS6B02G393600	Aspartate aminotransferase [Source:UniProtKB/TrEMBL%3BAcc:A0A1D6AMM3]	K00811 aspartate aminotransferase, chloroplastic [EC:2.6.1.1] | (RefSeq) aspartate aminotransferase P2, mitochondrial (A)	ko00220: Arginine biosynthesis; ko00250: Alanine, aspartate and glutamate metabolism; ko00270: Cysteine and methionine metabolism; ko00330: Arginine and proline metabolism; ko00350: Tyrosine metabolism; ko00360: Phenylalanine metabolism; ko00400: Phenylalanine, tyrosine and tryptophan biosynthesis; ko00950: Isoquinoline alkaloid biosynthesis; ko00960: Tropane, piperidine and pyridine alkaloid bio…	aspartate aminotransferase, chloroplastic [Aegilops tauschii subsp. tauschii]	AAT5_ARATH RecName: Full=Aspartate aminotransferase, chloroplastic; EC=2.6.1.1; AltName: Full=Transaminase A; Flags: Precursor;	A0A446WQ43_TRITD RecName: Full=Aspartate aminotransferase {ECO:0000256|RuleBase:RU000480}; EC=2.6.1.1 {ECO:0000256|RuleBase:RU000480};	At4g31990	GO:0009501,amyloplast; GO:0009507,chloroplast; GO:0004069,L-aspartate:2-oxoglutarate aminotransferase activity; GO:0030170,pyridoxal phosphate binding; GO:0006103,2-oxoglutarate metabolic process; GO:0006531,aspartate metabolic process; GO:0009058,biosynthetic process; GO:0006536,glutamate metabolic process; GO:0003674,molecular_function; GO:0003824,catalytic activity; GO:0008483,transaminase act…	PF00155.21:Aminotransferase class I and II	--	--	--
TraesCS6B02G321400	FALSE	TRUE	TRUE	TRUE	3.84	3.95	5.09	4.29333	6.73	7.15	7.16	7.01333	0.09	0.08	0.19	0.12	0.59	0.63	0.32	0.513333	6B	569367522	569370614	+	TraesCS6B02G321400	--	K00128 aldehyde dehydrogenase (NAD+) [EC:1.2.1.3] | (RefSeq) aldehyde dehydrogenase family 2 member B7, mitochondrial-like (A)	ko00010: Glycolysis / Gluconeogenesis; ko00053: Ascorbate and aldarate metabolism; ko00071: Fatty acid degradation; ko00280: Valine, leucine and isoleucine degradation; ko00310: Lysine degradation; ko00330: Arginine and proline metabolism; ko00340: Histidine metabolism; ko00380: Tryptophan metabolism; ko00410: beta-Alanine metabolism; ko00561: Glycerolipid metabolism; ko00620: Pyruvate metabolism…	aldehyde dehydrogenase family 2 member B7, mitochondrial-like [Aegilops tauschii subsp. tauschii]	BALDH_ANTMA RecName: Full=Benzaldehyde dehydrogenase, mitochondrial {ECO:0000303|PubMed:19292760}; EC=1.2.1.28 {ECO:0000269|PubMed:19292760}; AltName: Full=2-phenylacetaldehyde dehydrogenase {ECO:0000305}; EC=1.2.1.39 {ECO:0000269|PubMed:19292760}; AltName: Full=Acetaldehyde dehydrogenase {ECO:0000305}; EC=1.2.1.3 {ECO:0000269|PubMed:19292760}; Flags: Precursor;	A0A3B6PPW7_WHEAT RecName: Full=Aldedh domain-containing protein {ECO:0000259|Pfam:PF00171};	At1g23800	GO:0005739,mitochondrion; GO:0008774,acetaldehyde dehydrogenase (acetylating) activity; GO:0004029,aldehyde dehydrogenase (NAD+) activity; GO:0018479,benzaldehyde dehydrogenase (NAD+) activity; GO:0043878,glyceraldehyde-3-phosphate dehydrogenase (NAD+) (non-phosphorylating) activity; GO:0008957,phenylacetaldehyde dehydrogenase activity; GO:0007623,circadian rhythm; GO:0010597,green leaf volatile …	PF00171.22:Aldehyde dehydrogenase family	--	--	--
TraesCS6B02G247900	FALSE	TRUE	FALSE	FALSE	2.45	2.39	1.62	2.15333	1.01	1.37	0.08	0.82	2.4	4.36	2.11	2.95667	0.77	1.97	1.06	1.26667	6B	444682543	444687809	+	TraesCS6B02G247900	--	K01653 acetolactate synthase I/III small subunit [EC:2.2.1.6] | (RefSeq) acetolactate synthase small subunit 2, chloroplastic-like isoform X1 (A)	ko00290: Valine, leucine and isoleucine biosynthesis; ko00650: Butanoate metabolism; ko00660: C5-Branched dibasic acid metabolism; ko00770: Pantothenate and CoA biosynthesis; ko01100: Metabolic pathways; ko01110: Biosynthesis of secondary metabolites; ko01210: 2-Oxocarboxylic acid metabolism; ko01230: Biosynthesis of amino acids	acetolactate synthase small subunit 2, chloroplastic-like isoform X1 [Aegilops tauschii subsp. tauschii]	ILVH2_ARATH RecName: Full=Acetolactate synthase small subunit 2, chloroplastic; AltName: Full=Acetohydroxy-acid synthase small subunit; Short=AHAS; Short=ALS; Flags: Precursor;	A0A3B6PKQ3_WHEAT RecName: Full=Acetohydroxy-acid synthase small subunit {ECO:0000256|ARBA:ARBA00019804};	At5g16290	GO:0009507,chloroplast; GO:0005829,cytosol; GO:0005777,peroxisome; GO:0003984,acetolactate synthase activity; GO:1990610,acetolactate synthase regulator activity; GO:0043621,protein self-association; GO:0009097,isoleucine biosynthetic process; GO:0050790,regulation of catalytic activity; GO:0009099,valine biosynthetic process; GO:0003674,molecular_function; GO:0003824,catalytic activity; GO:00167…	PF10369.9:Small subunit of acetolactate synthase	--	--	--
TraesCS6B02G243700	FALSE	TRUE	FALSE	FALSE	36.54	29.88	28.61	31.6767	20.92	22.02	16.73	19.89	32.61	65.38	43.85	47.28	9.35	10.95	26.39	15.5633	6B	433678666	433681701	+	TraesCS6B02G243700	Glyceraldehyde-3-phosphate dehydrogenase [Source:UniProtKB/TrEMBL%3BAcc:W5GM69]	K00134 glyceraldehyde 3-phosphate dehydrogenase (phosphorylating) [EC:1.2.1.12] | (RefSeq) glyceraldehyde-3-phosphate dehydrogenase 2, cytosolic-like isoform X1 (A)	ko00010: Glycolysis / Gluconeogenesis; ko00710: Carbon fixation in photosynthetic organisms; ko01100: Metabolic pathways; ko01110: Biosynthesis of secondary metabolites; ko01200: Carbon metabolism; ko01230: Biosynthesis of amino acids	glyceraldehyde-3-phosphate dehydrogenase 2, cytosolic [Aegilops tauschii subsp. tauschii]	G3PC2_HORVU RecName: Full=Glyceraldehyde-3-phosphate dehydrogenase 2, cytosolic; EC=1.2.1.12; Flags: Fragment;	A0A3B6PLP7_WHEAT RecName: Full=Glyceraldehyde-3-phosphate dehydrogenase {ECO:0000256|RuleBase:RU361160}; EC=1.2.1.- {ECO:0000256|RuleBase:RU361160};	At3g04120	GO:0005737,cytoplasm; GO:0004365,glyceraldehyde-3-phosphate dehydrogenase (NAD+) (phosphorylating) activity; GO:0051287,NAD binding; GO:0050661,NADP binding; GO:0006006,glucose metabolic process; GO:0006096,glycolytic process; GO:0003674,molecular_function; GO:0003824,catalytic activity; GO:0016491,oxidoreductase activity; GO:0016620,oxidoreductase activity, acting on the aldehyde or oxo group of…	PF02800.20:Glyceraldehyde 3-phosphate dehydrogenase, C-terminal domain	--	--	--
TraesCS6B02G175700	FALSE	TRUE	FALSE	FALSE	3.79	2.38	2.61	2.92667	2.75	2.07	3.22	2.68	4.44	5.36	4.27	4.69	2.11	2.25	1.82	2.06	6B	191749509	191751986	+	TraesCS6B02G175700	Chorismate mutase [Source:UniProtKB/TrEMBL%3BAcc:A0A1D6B0M1]	K01850 chorismate mutase [EC:5.4.99.5] | (RefSeq) chorismate mutase 2, cytosolic-like (A)	ko00400: Phenylalanine, tyrosine and tryptophan biosynthesis; ko01100: Metabolic pathways; ko01110: Biosynthesis of secondary metabolites; ko01230: Biosynthesis of amino acids	chorismate mutase 2 [Aegilops tauschii subsp. tauschii]	CM2_MAIZE RecName: Full=Chorismate mutase 2, cytosolic {ECO:0000305}; Short=ZmCM2 {ECO:0000303|PubMed:21976020}; EC=5.4.99.5 {ECO:0000255|PROSITE-ProRule:PRU00516, ECO:0000269|PubMed:21976020};	A0A3B6PJ99_WHEAT RecName: Full=Chorismate mutase {ECO:0000256|ARBA:ARBA00012404, ECO:0000256|PIRNR:PIRNR017318}; EC=5.4.99.5 {ECO:0000256|ARBA:ARBA00012404, ECO:0000256|PIRNR:PIRNR017318};	At5g10870	GO:0005737,cytoplasm; GO:0005829,cytosol; GO:0004106,chorismate mutase activity; GO:0042803,protein homodimerization activity; GO:0009073,aromatic amino acid family biosynthetic process; GO:0008652,cellular amino acid biosynthetic process; GO:0046417,chorismate metabolic process; GO:0003674,molecular_function; GO:0003824,catalytic activity; GO:0016853,isomerase activity; GO:0016866,intramolecular…	--	--	--	--
TraesCS6B02G171400	FALSE	FALSE	TRUE	TRUE	1.71	2.17	2.98	2.28667	2.38	1.99	5.5	3.29	0	0	0	0	0	0	0	0	6B	183753733	183762420	-	TraesCS6B02G171400	Peptidylprolyl isomerase [Source:UniProtKB/TrEMBL%3BAcc:A0A341X6A3]	K00616 transaldolase [EC:2.2.1.2] | (RefSeq) uncharacterized protein LOC122671104 (A)	ko00030: Pentose phosphate pathway; ko01100: Metabolic pathways; ko01110: Biosynthesis of secondary metabolites; ko01200: Carbon metabolism; ko01230: Biosynthesis of amino acids	peptidyl-prolyl cis-trans isomerase FKBP17-1, chloroplastic [Aegilops tauschii subsp. tauschii]	FK171_ARATH RecName: Full=Peptidyl-prolyl cis-trans isomerase FKBP17-1, chloroplastic; Short=PPIase FKBP17-1; EC=5.2.1.8; AltName: Full=FK506-binding protein 17-1; Short=AtFKBP17-1; AltName: Full=Immunophilin FKBP17-1; AltName: Full=Rotamase; Flags: Precursor;	A0A3B6PKX4_WHEAT RecName: Full=Peptidylprolyl isomerase {ECO:0000256|PROSITE-ProRule:PRU00277}; EC=5.2.1.8 {ECO:0000256|PROSITE-ProRule:PRU00277};	At4g19830	GO:0009543,chloroplast thylakoid lumen; GO:0003755,peptidyl-prolyl cis-trans isomerase activity; GO:0003674,molecular_function; GO:0003824,catalytic activity; GO:0016853,isomerase activity; GO:0016859,cis-trans isomerase activity; GO:0140096,catalytic activity, acting on a protein; GO:0005575,cellular_component; GO:0005622,intracellular anatomical structure; GO:0005737,cytoplasm; GO:0009507,chlor…	PF00254.28:FKBP-type peptidyl-prolyl cis-trans isomerase	--	--	--
TraesCS6B02G101600	FALSE	FALSE	TRUE	FALSE	0.15	0.12	0.11	0.126667	0.48	1.3	0.57	0.783333	1.02	1.31	2.12	1.48333	1.59	1.27	1.37	1.41	6B	79846995	79851885	+	TraesCS6B02G101600	--	K01681 aconitate hydratase [EC:4.2.1.3] | (RefSeq) putative aconitate hydratase, cytoplasmic (A)	ko00020: Citrate cycle (TCA cycle); ko00630: Glyoxylate and dicarboxylate metabolism; ko01100: Metabolic pathways; ko01110: Biosynthesis of secondary metabolites; ko01200: Carbon metabolism; ko01210: 2-Oxocarboxylic acid metabolism; ko01230: Biosynthesis of amino acids	uncharacterized protein LOC109731503 [Aegilops tauschii subsp. tauschii]	--	A0A446W2C2_TRITD RecName: Full=F-box domain-containing protein {ECO:0000259|Pfam:PF12937};	--	--	PF12937.7:F-box-like	--	--	--
TraesCS6B02G099000	FALSE	FALSE	TRUE	FALSE	0.1	0.04	0.2	0.113333	0.05	0.26	0.09	0.133333	0.47	0.36	0.55	0.46	0.53	0.29	0.38	0.4	6B	76474050	76477540	+	TraesCS6B02G099000	--	K01681 aconitate hydratase [EC:4.2.1.3] | (RefSeq) putative aconitate hydratase, cytoplasmic (A)	ko00020: Citrate cycle (TCA cycle); ko00630: Glyoxylate and dicarboxylate metabolism; ko01100: Metabolic pathways; ko01110: Biosynthesis of secondary metabolites; ko01200: Carbon metabolism; ko01210: 2-Oxocarboxylic acid metabolism; ko01230: Biosynthesis of amino acids	PREDICTED: putative F-box protein At3g16210 [Brachypodium distachyon]	--	A0A3B6PGW4_WHEAT RecName: Full=F-box domain-containing protein {ECO:0000259|Pfam:PF12937};	--	--	PF12937.7:F-box-like	--	--	--
TraesCS6B02G086000	FALSE	TRUE	TRUE	FALSE	1.29	1.07	1.25	1.20333	0.94	1.43	0.95	1.10667	3.22	3.37	2.11	2.9	1.35	1.86	0.91	1.37333	6B	62400681	62405126	-	TraesCS6B02G086000	--	K01681 aconitate hydratase [EC:4.2.1.3] | (RefSeq) putative aconitate hydratase, cytoplasmic (A)	ko00020: Citrate cycle (TCA cycle); ko00630: Glyoxylate and dicarboxylate metabolism; ko01100: Metabolic pathways; ko01110: Biosynthesis of secondary metabolites; ko01200: Carbon metabolism; ko01210: 2-Oxocarboxylic acid metabolism; ko01230: Biosynthesis of amino acids	uncharacterized protein LOC109758446 [Aegilops tauschii subsp. tauschii]	--	A0A3B6PHY6_WHEAT RecName: Full=F-box domain-containing protein {ECO:0000259|Pfam:PF00646};	--	--	PF00646.33:F-box domain	--	--	--
TraesCS6B02G074700	FALSE	FALSE	TRUE	FALSE	0	0	0	0	0.49	1.88	0	0.79	1.03	1.83	1.37	1.41	3.66	1.92	1.76	2.44667	6B	51349732	51353277	-	TraesCS6B02G074700	--	K01681 aconitate hydratase [EC:4.2.1.3] | (RefSeq) putative aconitate hydratase, cytoplasmic (A)	ko00020: Citrate cycle (TCA cycle); ko00630: Glyoxylate and dicarboxylate metabolism; ko01100: Metabolic pathways; ko01110: Biosynthesis of secondary metabolites; ko01200: Carbon metabolism; ko01210: 2-Oxocarboxylic acid metabolism; ko01230: Biosynthesis of amino acids	uncharacterized protein LOC109750891 [Aegilops tauschii subsp. tauschii]	--	A0A3B6PG57_WHEAT RecName: Full=F-box domain-containing protein {ECO:0000259|Pfam:PF12937};	--	--	PF12937.7:F-box-like	--	--	--
TraesCS6B02G054700	FALSE	FALSE	TRUE	FALSE	1	0.68	0.72	0.8	0.41	0.37	2.69	1.15667	0	0.02	0.32	0.113333	0.13	0.03	0.14	0.1	6B	35411595	35414982	+	TraesCS6B02G054700	--	K01681 aconitate hydratase [EC:4.2.1.3] | (RefSeq) putative aconitate hydratase, cytoplasmic (A)	ko00020: Citrate cycle (TCA cycle); ko00630: Glyoxylate and dicarboxylate metabolism; ko01100: Metabolic pathways; ko01110: Biosynthesis of secondary metabolites; ko01200: Carbon metabolism; ko01210: 2-Oxocarboxylic acid metabolism; ko01230: Biosynthesis of amino acids	hypothetical protein TRIUR3_05176 [Triticum urartu]	--	A0A446VZK8_TRITD SubName: Full=Uncharacterized protein {ECO:0000313|EMBL:VAI53323.1};	--	--	PF12937.7:F-box-like	--	--	--
TraesCS6A02G236000	FALSE	FALSE	TRUE	FALSE	1.54	2.84	2.08	2.15333	0.87	0.7	1.75	1.10667	0	0	0	0	0	0	0	0	6A	445569911	445576294	-	TraesCS6A02G236000	--	K01803 triosephosphate isomerase (TIM) [EC:5.3.1.1] | (RefSeq) triosephosphate isomerase, cytosolic-like (A)	ko00010: Glycolysis / Gluconeogenesis; ko00051: Fructose and mannose metabolism; ko00562: Inositol phosphate metabolism; ko00710: Carbon fixation in photosynthetic organisms; ko01100: Metabolic pathways; ko01110: Biosynthesis of secondary metabolites; ko01200: Carbon metabolism; ko01230: Biosynthesis of amino acids	elicitor-responsive protein 3-like [Aegilops tauschii subsp. tauschii]	ERG3_ORYSI RecName: Full=Elicitor-responsive protein 3; AltName: Full=16 kDa phloem protein; AltName: Full=RPP16;	A0A446WG01_TRITD RecName: Full=C2 domain-containing protein {ECO:0000259|PROSITE:PS50004};	At1g63220	GO:0005737,cytoplasm; GO:0046872,metal ion binding; GO:0003674,molecular_function; GO:0005488,binding; GO:0043167,ion binding; GO:0043169,cation binding; GO:0005575,cellular_component; GO:0005622,intracellular anatomical structure; GO:0110165,cellular anatomical entity	PF00168.30:C2 domain	--	--	--
TraesCS6A02G169300	FALSE	TRUE	FALSE	FALSE	177.33	120.86	116.05	138.08	74.96	102.17	63.27	80.1333	150.32	143.72	154.77	149.603	38.72	83.75	63.9	62.1233	6A	177263829	177266445	+	TraesCS6A02G169300	S-adenosylmethionine synthase [Source:UniProtKB/TrEMBL%3BAcc:W5GBW4]	K00789 S-adenosylmethionine synthetase [EC:2.5.1.6] | (RefSeq) S-adenosylmethionine synthase (A)	ko00270: Cysteine and methionine metabolism; ko00999: Biosynthesis of various plant secondary metabolites; ko01100: Metabolic pathways; ko01110: Biosynthesis of secondary metabolites; ko01230: Biosynthesis of amino acids; ko01240: Biosynthesis of cofactors	S-adenosylmethionine synthase 4 [Triticum urartu]	METK4_HORVU RecName: Full=S-adenosylmethionine synthase 4; Short=AdoMet synthase 4; EC=2.5.1.6 {ECO:0000250|UniProtKB:Q96551}; AltName: Full=Methionine adenosyltransferase 4; Short=MAT 4;	M7ZXH5_TRIUA RecName: Full=S-adenosylmethionine synthase {ECO:0000256|RuleBase:RU000541}; EC=2.5.1.6 {ECO:0000256|RuleBase:RU000541};	At4g01850	GO:0005737,cytoplasm; GO:0005524,ATP binding; GO:0046872,metal ion binding; GO:0004478,methionine adenosyltransferase activity; GO:0006730,one-carbon metabolic process; GO:0006556,S-adenosylmethionine biosynthetic process; GO:0000166,nucleotide binding; GO:0003674,molecular_function; GO:0005488,binding; GO:0017076,purine nucleotide binding; GO:0030554,adenyl nucleotide binding; GO:0032553,ribonuc…	PF02773.16:S-adenosylmethionine synthetase, C-terminal domain	--	--	--
TraesCS6A02G163300	FALSE	FALSE	TRUE	FALSE	0.4	0.45	0.36	0.403333	0.57	0.41	1.01	0.663333	0.77	1.57	1.03	1.12333	0.41	0.6	0.37	0.46	6A	158905371	158911293	+	TraesCS6A02G163300	--	K00872 homoserine kinase [EC:2.7.1.39] | (RefSeq) DNA (cytosine-5)-methyltransferase DRM2-like (A)	ko00260: Glycine, serine and threonine metabolism; ko01100: Metabolic pathways; ko01110: Biosynthesis of secondary metabolites; ko01230: Biosynthesis of amino acids	DNA (cytosine-5)-methyltransferase DRM2 [Triticum urartu]	DRM2_ORYSJ RecName: Full=DNA (cytosine-5)-methyltransferase DRM2 {ECO:0000305}; EC=2.1.1.37 {ECO:0000305}; AltName: Full=OsDRM2 {ECO:0000303|PubMed:22380881}; AltName: Full=Protein DOMAINS REARRANGED METHYLASE 2 {ECO:0000305};	A0A446VAN0_TRITD RecName: Full=SAM-dependent MTase DRM-type domain-containing protein {ECO:0000259|PROSITE:PS51680};	At5g14620	GO:0005634,nucleus; GO:0003886,DNA (cytosine-5-)-methyltransferase activity; GO:0003677,DNA binding; GO:0003674,molecular_function; GO:0003824,catalytic activity; GO:0008168,methyltransferase activity; GO:0008757,S-adenosylmethionine-dependent methyltransferase activity; GO:0009008,DNA-methyltransferase activity; GO:0016740,transferase activity; GO:0016741,transferase activity, transferring one-c…	PF00627.31:UBA/TS-N domain	--	--	--
TraesCS6A02G039700	FALSE	FALSE	TRUE	TRUE	9.62	12.75	8.92	10.43	5.51	6.74	8.45	6.9	0	0	0	0	0	0	0	0	6A	20506871	20507713	+	TraesCS6A02G039700	--	K01681 aconitate hydratase [EC:4.2.1.3] | (RefSeq) putative aconitate hydratase, cytoplasmic (A)	ko00020: Citrate cycle (TCA cycle); ko00630: Glyoxylate and dicarboxylate metabolism; ko01100: Metabolic pathways; ko01110: Biosynthesis of secondary metabolites; ko01200: Carbon metabolism; ko01210: 2-Oxocarboxylic acid metabolism; ko01230: Biosynthesis of amino acids	hypothetical protein TRIUR3_05176 [Triticum urartu]	--	A0A3B6NI33_WHEAT SubName: Full=Uncharacterized protein {ECO:0000313|EnsemblPlants:TraesCS6A02G039700.1};	--	--	--	--	--	--
TraesCS6A02G036000	FALSE	FALSE	TRUE	TRUE	13.16	10.24	9.05	10.8167	16.01	16.74	22.58	18.4433	0.19	0.44	0.51	0.38	0.73	1.08	0.32	0.71	6A	17662406	17667466	-	TraesCS6A02G036000	--	K00167 2-oxoisovalerate dehydrogenase E1 component beta subunit [EC:1.2.4.4] | (RefSeq) 2-oxoisovalerate dehydrogenase subunit beta 1, mitochondrial-like (A)	ko00280: Valine, leucine and isoleucine degradation; ko00640: Propanoate metabolism; ko01100: Metabolic pathways; ko01110: Biosynthesis of secondary metabolites	2-oxoisovalerate dehydrogenase subunit beta 1, mitochondrial-like [Aegilops tauschii subsp. tauschii]	ODBB1_ARATH RecName: Full=2-oxoisovalerate dehydrogenase subunit beta 1, mitochondrial; EC=1.2.4.4; AltName: Full=Branched-chain alpha-keto acid dehydrogenase E1 component beta chain; Short=BCKDE1B; Short=BCKDH E1-beta; Flags: Precursor;	A0A3B6NHY1_WHEAT RecName: Full=Transket_pyr domain-containing protein {ECO:0000259|SMART:SM00861};	At1g55510	GO:0005947,mitochondrial alpha-ketoglutarate dehydrogenase complex; GO:0003863,3-methyl-2-oxobutanoate dehydrogenase (2-methylpropanoyl-transferring) activity; GO:0009083,branched-chain amino acid catabolic process; GO:0007584,response to nutrient; GO:0003674,molecular_function; GO:0003824,catalytic activity; GO:0016491,oxidoreductase activity; GO:0016624,oxidoreductase activity, acting on the al…	PF02779.24:Transketolase, pyrimidine binding domain	--	--	--
TraesCS6A02G027100	FALSE	FALSE	TRUE	TRUE	0	0	0.01	0.00333333	0.06	0.03	0	0.03	0.52	1.3	0.43	0.75	1.51	1.07	1.31	1.29667	6A	13672236	13677629	+	TraesCS6A02G027100	--	K01681 aconitate hydratase [EC:4.2.1.3] | (RefSeq) putative aconitate hydratase, cytoplasmic (A)	ko00020: Citrate cycle (TCA cycle); ko00630: Glyoxylate and dicarboxylate metabolism; ko01100: Metabolic pathways; ko01110: Biosynthesis of secondary metabolites; ko01200: Carbon metabolism; ko01210: 2-Oxocarboxylic acid metabolism; ko01230: Biosynthesis of amino acids	hypothetical protein TRIUR3_15409 [Triticum urartu]	--	A0A446V1F3_TRITD SubName: Full=Uncharacterized protein {ECO:0000313|EMBL:VAI41676.1};	--	--	PF12937.7:F-box-like	--	--	--
TraesCS6A02G007600	FALSE	FALSE	TRUE	FALSE	0.23	0.04	0.1	0.123333	0.1	0.45	0.48	0.343333	0.99	0.35	1.08	0.806667	0.7	0.27	1.39	0.786667	6A	3001015	3003106	+	TraesCS6A02G007600	--	K01681 aconitate hydratase [EC:4.2.1.3] | (RefSeq) putative aconitate hydratase, cytoplasmic (A)	ko00020: Citrate cycle (TCA cycle); ko00630: Glyoxylate and dicarboxylate metabolism; ko01100: Metabolic pathways; ko01110: Biosynthesis of secondary metabolites; ko01200: Carbon metabolism; ko01210: 2-Oxocarboxylic acid metabolism; ko01230: Biosynthesis of amino acids	putative F-box/kelch-repeat protein At3g17540 [Aegilops tauschii subsp. tauschii]	--	A0A3B6NIR9_WHEAT SubName: Full=Uncharacterized protein {ECO:0000313|EnsemblPlants:TraesCS6A02G007600.1};	--	--	--	--	--	--
TraesCS5D02G543700	FALSE	FALSE	TRUE	FALSE	0.5	0.98	1.02	0.833333	0.76	1.27	1.99	1.34	0.23	0.11	0.3	0.213333	0.87	0.09	0.48	0.48	5D	553758473	553770993	+	TraesCS5D02G543700	--	K01681 aconitate hydratase [EC:4.2.1.3] | (RefSeq) putative aconitate hydratase, cytoplasmic (A)	ko00020: Citrate cycle (TCA cycle); ko00630: Glyoxylate and dicarboxylate metabolism; ko01100: Metabolic pathways; ko01110: Biosynthesis of secondary metabolites; ko01200: Carbon metabolism; ko01210: 2-Oxocarboxylic acid metabolism; ko01230: Biosynthesis of amino acids	uncharacterized protein LOC109787171 [Aegilops tauschii subsp. tauschii]	--	A0A3B6N1B9_WHEAT RecName: Full=F-box domain-containing protein {ECO:0000259|Pfam:PF12937};	--	--	PF12937.7:F-box-like	--	--	--
TraesCS5D02G461500	FALSE	FALSE	TRUE	FALSE	0.56	0.51	0.71	0.593333	0.73	1.23	0.84	0.933333	2.37	2.17	1.15	1.89667	1.07	2.21	1.29	1.52333	5D	505461427	505463398	+	TraesCS5D02G461500	--	K01681 aconitate hydratase [EC:4.2.1.3] | (RefSeq) putative aconitate hydratase, cytoplasmic (A)	ko00020: Citrate cycle (TCA cycle); ko00630: Glyoxylate and dicarboxylate metabolism; ko01100: Metabolic pathways; ko01110: Biosynthesis of secondary metabolites; ko01200: Carbon metabolism; ko01210: 2-Oxocarboxylic acid metabolism; ko01230: Biosynthesis of amino acids	uncharacterized protein LOC109763184 [Aegilops tauschii subsp. tauschii]	--	A0A3B6MYP3_WHEAT SubName: Full=Uncharacterized protein {ECO:0000313|EnsemblPlants:TraesCS5D02G461500.1};	--	--	PF00646.33:F-box domain	--	--	--
TraesCS5D02G416800	FALSE	TRUE	FALSE	FALSE	2.33	3	2.7	2.67667	4.28	4.48	4.86	4.54	2.91	3.98	3.07	3.32	9.68	8.01	5.83	7.84	5D	478960504	478963930	-	TraesCS5D02G416800	--	K01681 aconitate hydratase [EC:4.2.1.3] | (RefSeq) putative aconitate hydratase, cytoplasmic (A)	ko00020: Citrate cycle (TCA cycle); ko00630: Glyoxylate and dicarboxylate metabolism; ko01100: Metabolic pathways; ko01110: Biosynthesis of secondary metabolites; ko01200: Carbon metabolism; ko01210: 2-Oxocarboxylic acid metabolism; ko01230: Biosynthesis of amino acids	uncharacterized protein LOC109780091 [Aegilops tauschii subsp. tauschii]	--	A0A3B6MYI2_WHEAT RecName: Full=F-box domain-containing protein {ECO:0000259|SMART:SM00256};	--	--	PF12937.7:F-box-like	--	--	--
TraesCS5D02G254300	FALSE	FALSE	TRUE	FALSE	8.62	9.86	11.28	9.92	4.61	6.61	8.03	6.41667	4.52	2.38	6.43	4.44333	4.21	2.15	3.9	3.42	5D	360970077	360983573	-	TraesCS5D02G254300	--	K00850 6-phosphofructokinase 1 [EC:2.7.1.11] | (RefSeq) ATP-dependent 6-phosphofructokinase 6-like (A)	ko00010: Glycolysis / Gluconeogenesis; ko00030: Pentose phosphate pathway; ko00051: Fructose and mannose metabolism; ko00052: Galactose metabolism; ko01100: Metabolic pathways; ko01110: Biosynthesis of secondary metabolites; ko01200: Carbon metabolism; ko01230: Biosynthesis of amino acids; ko03018: RNA degradation	purine permease 3-like [Aegilops tauschii subsp. tauschii]	PUP1_ARATH RecName: Full=Purine permease 1 {ECO:0000303|PubMed:10662864}; Short=AtPUP1 {ECO:0000303|PubMed:10662864};	A0A446UCD2_TRITD RecName: Full=Probable purine permease {ECO:0000256|RuleBase:RU368015};	At1g28220	GO:0005887,integral component of plasma membrane; GO:0005345,purine nucleobase transmembrane transporter activity; GO:0015211,purine nucleoside transmembrane transporter activity; GO:0010184,cytokinin transport; GO:0006863,purine nucleobase transport; GO:0003674,molecular_function; GO:0005215,transporter activity; GO:0008509,anion transmembrane transporter activity; GO:0015075,ion transmembrane t…	PF16913.5:Purine nucleobase transmembrane transport	--	--	--
TraesCS5D02G254100	FALSE	TRUE	TRUE	FALSE	3.69	5.65	6.36	5.23333	5.93	5.28	22.72	11.31	0.96	0.78	1.81	1.18333	6.67	1.49	3.53	3.89667	5D	360767353	360770398	-	TraesCS5D02G254100	--	K00850 6-phosphofructokinase 1 [EC:2.7.1.11] | (RefSeq) ATP-dependent 6-phosphofructokinase 6-like (A)	ko00010: Glycolysis / Gluconeogenesis; ko00030: Pentose phosphate pathway; ko00051: Fructose and mannose metabolism; ko00052: Galactose metabolism; ko01100: Metabolic pathways; ko01110: Biosynthesis of secondary metabolites; ko01200: Carbon metabolism; ko01230: Biosynthesis of amino acids; ko03018: RNA degradation	purine permease 3-like [Aegilops tauschii subsp. tauschii]	PUP1_ARATH RecName: Full=Purine permease 1 {ECO:0000303|PubMed:10662864}; Short=AtPUP1 {ECO:0000303|PubMed:10662864};	A0A453L0G4_AEGTS RecName: Full=Probable purine permease {ECO:0000256|RuleBase:RU368015};	At1g28230	GO:0005887,integral component of plasma membrane; GO:0005345,purine nucleobase transmembrane transporter activity; GO:0015211,purine nucleoside transmembrane transporter activity; GO:0010184,cytokinin transport; GO:0006863,purine nucleobase transport; GO:0003674,molecular_function; GO:0005215,transporter activity; GO:0008509,anion transmembrane transporter activity; GO:0015075,ion transmembrane t…	PF16913.5:Purine nucleobase transmembrane transport	--	--	--
TraesCS5D02G252100	FALSE	FALSE	TRUE	FALSE	6.77	12.05	14.35	11.0567	3.32	2.44	12.2	5.98667	2.2	0.92	1.81	1.64333	2.79	2.16	1.61	2.18667	5D	357886421	357888525	-	TraesCS5D02G252100	--	K00020 3-hydroxyisobutyrate dehydrogenase [EC:1.1.1.31] | (RAP-DB) Os05g0565500; 3-hydroxyacid dehydrogenase/reductase domain containing protein. (A)	ko00280: Valine, leucine and isoleucine degradation; ko01100: Metabolic pathways	uncharacterized protein LOC109742600 [Aegilops tauschii subsp. tauschii]	--	A0A3B6MU79_WHEAT SubName: Full=Uncharacterized protein {ECO:0000313|EnsemblPlants:TraesCS5D02G252100.1};	--	GO:0016021,integral component of membrane; GO:0005575,cellular_component; GO:0016020,membrane; GO:0031224,intrinsic component of membrane; GO:0110165,cellular anatomical entity	PF06839.12:GRF zinc finger	--	--	--
TraesCS5D02G126700	FALSE	TRUE	FALSE	FALSE	1.6	1.82	2.44	1.95333	3	3.72	1.96	2.89333	1.98	2.18	1.58	1.91333	5.51	4.08	2.37	3.98667	5D	193613840	193633432	+	TraesCS5D02G126700	--	K00166 2-oxoisovalerate dehydrogenase E1 component alpha subunit [EC:1.2.4.4] | (RefSeq) 2-oxoisovalerate dehydrogenase subunit alpha 2, mitochondrial-like (A)	ko00280: Valine, leucine and isoleucine degradation; ko00640: Propanoate metabolism; ko01100: Metabolic pathways; ko01110: Biosynthesis of secondary metabolites	2-oxoisovalerate dehydrogenase subunit alpha 2, mitochondrial-like [Aegilops tauschii subsp. tauschii]	ODBA2_ARATH RecName: Full=2-oxoisovalerate dehydrogenase subunit alpha 2, mitochondrial; EC=1.2.4.4; AltName: Full=Branched-chain alpha-keto acid dehydrogenase E1 component alpha chain; Short=BCKDE1A; Short=BCKDH E1-alpha; Flags: Precursor;	A0A3B6MM57_WHEAT RecName: Full=E1_dh domain-containing protein {ECO:0000259|Pfam:PF00676};	At5g09300	GO:0005947,mitochondrial alpha-ketoglutarate dehydrogenase complex; GO:0005739,mitochondrion; GO:0003863,3-methyl-2-oxobutanoate dehydrogenase (2-methylpropanoyl-transferring) activity; GO:0003826,alpha-ketoacid dehydrogenase activity; GO:0046872,metal ion binding; GO:0009083,branched-chain amino acid catabolic process; GO:0003674,molecular_function; GO:0003824,catalytic activity; GO:0016491,oxid…	PF00676.20:Dehydrogenase E1 component	--	--	--
TraesCS5D02G019800	FALSE	TRUE	FALSE	FALSE	54.3	48.21	48.96	50.49	34.05	36.72	52.63	41.1333	37.57	87.04	44.1	56.2367	19.2	18.47	34.99	24.22	5D	12596338	12601344	+	TraesCS5D02G019800	--	K01689 enolase [EC:4.2.1.11] | (RefSeq) enolase-like (A)	ko00010: Glycolysis / Gluconeogenesis; ko01100: Metabolic pathways; ko01110: Biosynthesis of secondary metabolites; ko01200: Carbon metabolism; ko01230: Biosynthesis of amino acids; ko03018: RNA degradation	enolase-like isoform X2 [Aegilops tauschii subsp. tauschii]	ENO_ORYSJ RecName: Full=Enolase; EC=4.2.1.11; AltName: Full=2-phospho-D-glycerate hydro-lyase; AltName: Full=2-phosphoglycerate dehydratase; AltName: Full=OSE1;	A0A453JH85_AEGTS RecName: Full=Phosphopyruvate hydratase {ECO:0000256|ARBA:ARBA00012058}; EC=4.2.1.11 {ECO:0000256|ARBA:ARBA00012058};	At2g36530	GO:0000015,phosphopyruvate hydratase complex; GO:0000287,magnesium ion binding; GO:0004634,phosphopyruvate hydratase activity; GO:0006096,glycolytic process; GO:0032889,regulation of vacuole fusion, non-autophagic; GO:0003674,molecular_function; GO:0005488,binding; GO:0043167,ion binding; GO:0043169,cation binding; GO:0046872,metal ion binding; GO:0003824,catalytic activity; GO:0016829,lyase acti…	PF00113.22:Enolase, C-terminal TIM barrel domain	--	--	--
TraesCS5B02G447700	FALSE	FALSE	TRUE	FALSE	1.36	0.95	1.86	1.39	1	1.29	1.8	1.36333	0.6	0.6	0.47	0.556667	0.13	1.25	1.17	0.85	5B	618475640	618476734	-	TraesCS5B02G447700	--	K00641 homoserine O-acetyltransferase/O-succinyltransferase [EC:2.3.1.31 2.3.1.46] | (RefSeq) uncharacterized protein LOC112286322 (A)	ko00270: Cysteine and methionine metabolism; ko00920: Sulfur metabolism; ko01100: Metabolic pathways; ko01110: Biosynthesis of secondary metabolites; ko01230: Biosynthesis of amino acids	trihelix transcription factor ASR3-like [Aegilops tauschii subsp. tauschii]	ASR3_ARATH RecName: Full=Trihelix transcription factor ASR3 {ECO:0000303|PubMed:25770109}; AltName: Full=Protein ARABIDOPSIS SH4-RELATED3 {ECO:0000303|PubMed:25770109};	A0A3B6LV43_WHEAT RecName: Full=Myb-like domain-containing protein {ECO:0000259|PROSITE:PS50090};	At2g33550	GO:0005634,nucleus; GO:0003677,DNA binding; GO:0003700,DNA-binding transcription factor activity; GO:0042803,protein homodimerization activity; GO:0071219,cellular response to molecule of bacterial origin; GO:0006952,defense response; GO:0050777,negative regulation of immune response; GO:0045892,negative regulation of transcription, DNA-templated; GO:0006355,regulation of transcription, DNA-templ…	PF13837.6:Myb/SANT-like DNA-binding domain	--	--	--
TraesCS5B02G416700	FALSE	FALSE	TRUE	FALSE	19.12	17.35	16.82	17.7633	19.3	24.42	23.37	22.3633	40.59	46.47	46.71	44.59	45.97	44.29	52.09	47.45	5B	591481141	591487424	+	TraesCS5B02G416700	Citrate synthase [Source:UniProtKB/TrEMBL%3BAcc:A0A341VMQ6]	K01647 citrate synthase [EC:2.3.3.1] | (RefSeq) citrate synthase 3, peroxisomal-like (A)	ko00020: Citrate cycle (TCA cycle); ko00630: Glyoxylate and dicarboxylate metabolism; ko01100: Metabolic pathways; ko01110: Biosynthesis of secondary metabolites; ko01200: Carbon metabolism; ko01210: 2-Oxocarboxylic acid metabolism; ko01230: Biosynthesis of amino acids	citrate synthase 3, peroxisomal-like [Aegilops tauschii subsp. tauschii]	CISY3_ARATH RecName: Full=Citrate synthase 3, peroxisomal; EC=2.3.3.16; Flags: Precursor;	A0A3B6LU21_WHEAT RecName: Full=Citrate synthase {ECO:0000256|RuleBase:RU000441};	At2g42790	GO:0005829,cytosol; GO:0005759,mitochondrial matrix; GO:0005777,peroxisome; GO:0004108,citrate (Si)-synthase activity; GO:0005975,carbohydrate metabolic process; GO:0006635,fatty acid beta-oxidation; GO:0006099,tricarboxylic acid cycle; GO:0003674,molecular_function; GO:0003824,catalytic activity; GO:0016740,transferase activity; GO:0016746,transferase activity, transferring acyl groups; GO:00364…	PF00285.21:Citrate synthase, C-terminal domain	--	--	--
TraesCS5B02G403400	FALSE	FALSE	TRUE	FALSE	6.45	4.28	3.36	4.69667	10.32	12.07	5.9	9.43	7.17	20.08	7.44	11.5633	18.67	22.49	15.61	18.9233	5B	580100440	580104246	+	TraesCS5B02G403400	--	K00133 aspartate-semialdehyde dehydrogenase [EC:1.2.1.11] | (RefSeq) aspartate-semialdehyde dehydrogenase-like (A)	ko00260: Glycine, serine and threonine metabolism; ko00261: Monobactam biosynthesis; ko00270: Cysteine and methionine metabolism; ko00300: Lysine biosynthesis; ko01100: Metabolic pathways; ko01110: Biosynthesis of secondary metabolites; ko01210: 2-Oxocarboxylic acid metabolism; ko01230: Biosynthesis of amino acids	uncharacterized protein LOC109743487 [Aegilops tauschii subsp. tauschii]	--	A0A446UN22_TRITD RecName: Full=Aspartate-semialdehyde dehydrogenase {ECO:0000256|ARBA:ARBA00013120}; EC=1.2.1.11 {ECO:0000256|ARBA:ARBA00013120};	At1g14810	GO:0004073,aspartate-semialdehyde dehydrogenase activity; GO:0051287,NAD binding; GO:0050661,NADP binding; GO:0046983,protein dimerization activity; GO:0009097,isoleucine biosynthetic process; GO:0009089,lysine biosynthetic process via diaminopimelate; GO:0009086,methionine biosynthetic process; GO:0009088,threonine biosynthetic process; GO:0003674,molecular_function; GO:0003824,catalytic activit…	PF02774.18:Semialdehyde dehydrogenase, dimerisation domain	--	--	--
TraesCS5B02G372500	FALSE	TRUE	FALSE	FALSE	0.98	1.9	2.93	1.93667	5.14	7.92	1.61	4.89	2.41	3.15	4.55	3.37	5.27	8.69	8.17	7.37667	5B	550488462	550490140	+	TraesCS5B02G372500	Arogenate dehydratase [Source:UniProtKB/TrEMBL%3BAcc:A0A1D5Z168]	K05359 arogenate/prephenate dehydratase [EC:4.2.1.91 4.2.1.51] | (RefSeq) arogenate dehydratase/prephenate dehydratase 6, chloroplastic-like (A)	ko00400: Phenylalanine, tyrosine and tryptophan biosynthesis; ko01100: Metabolic pathways; ko01110: Biosynthesis of secondary metabolites; ko01230: Biosynthesis of amino acids	arogenate dehydratase/prephenate dehydratase 6, chloroplastic-like [Aegilops tauschii subsp. tauschii]	AROD3_PETHY RecName: Full=Arogenate dehydratase 3 {ECO:0000303|PubMed:20215586}; Short=PhADT3 {ECO:0000303|PubMed:20215586}; EC=4.2.1.91 {ECO:0000269|PubMed:20215586}; AltName: Full=Prephenate dehydratase ADT3 {ECO:0000305}; EC=4.2.1.51 {ECO:0000255|PROSITE-ProRule:PRU00517, ECO:0000269|PubMed:20215586}; Flags: Precursor;	A0A446UKJ7_TRITD RecName: Full=Arogenate dehydratase {ECO:0000256|ARBA:ARBA00013259, ECO:0000256|RuleBase:RU363004}; EC=4.2.1.91 {ECO:0000256|ARBA:ARBA00013259, ECO:0000256|RuleBase:RU363004};	At1g08250	GO:0009507,chloroplast; GO:0009570,chloroplast stroma; GO:0047769,arogenate dehydratase activity; GO:0004664,prephenate dehydratase activity; GO:0009094,L-phenylalanine biosynthetic process; GO:0003674,molecular_function; GO:0003824,catalytic activity; GO:0016829,lyase activity; GO:0016835,carbon-oxygen lyase activity; GO:0016836,hydro-lyase activity; GO:0006082,organic acid metabolic process; GO…	PF00800.18:Prephenate dehydratase	--	--	--
TraesCS5B02G244800	FALSE	FALSE	TRUE	TRUE	2.29	2.48	4.77	3.18	4.16	4.45	16.15	8.25333	1.42	0.65	1.01	1.02667	4.23	0.65	1.55	2.14333	5B	426131167	426134572	-	TraesCS5B02G244800	--	K00850 6-phosphofructokinase 1 [EC:2.7.1.11] | (RefSeq) ATP-dependent 6-phosphofructokinase 6-like (A)	ko00010: Glycolysis / Gluconeogenesis; ko00030: Pentose phosphate pathway; ko00051: Fructose and mannose metabolism; ko00052: Galactose metabolism; ko01100: Metabolic pathways; ko01110: Biosynthesis of secondary metabolites; ko01200: Carbon metabolism; ko01230: Biosynthesis of amino acids; ko03018: RNA degradation	purine permease 3-like [Aegilops tauschii subsp. tauschii]	PUP1_ARATH RecName: Full=Purine permease 1 {ECO:0000303|PubMed:10662864}; Short=AtPUP1 {ECO:0000303|PubMed:10662864};	A0A3B6LNK1_WHEAT RecName: Full=Probable purine permease {ECO:0000256|RuleBase:RU368015};	At1g28230	GO:0005887,integral component of plasma membrane; GO:0005345,purine nucleobase transmembrane transporter activity; GO:0015211,purine nucleoside transmembrane transporter activity; GO:0010184,cytokinin transport; GO:0006863,purine nucleobase transport; GO:0003674,molecular_function; GO:0005215,transporter activity; GO:0008509,anion transmembrane transporter activity; GO:0015075,ion transmembrane t…	PF16913.5:Purine nucleobase transmembrane transport	--	--	--
TraesCS5B02G210100	FALSE	TRUE	FALSE	FALSE	9.21	8.86	8.15	8.74	13.19	15.96	12.12	13.7567	10.08	15.38	9.45	11.6367	20.9	28.56	21.79	23.75	5B	380312349	380320211	+	TraesCS5B02G210100	--	K14085 aldehyde dehydrogenase family 7 member A1 [EC:1.2.1.31 1.2.1.8 1.2.1.3] | (RefSeq) aldehyde dehydrogenase family 7 member A1-like (A)	ko00010: Glycolysis / Gluconeogenesis; ko00053: Ascorbate and aldarate metabolism; ko00071: Fatty acid degradation; ko00260: Glycine, serine and threonine metabolism; ko00280: Valine, leucine and isoleucine degradation; ko00310: Lysine degradation; ko00330: Arginine and proline metabolism; ko00340: Histidine metabolism; ko00380: Tryptophan metabolism; ko00410: beta-Alanine metabolism; ko00561: Gl…	aldehyde dehydrogenase family 7 member A1 [Aegilops tauschii subsp. tauschii]	AL7A1_MALDO RecName: Full=Aldehyde dehydrogenase family 7 member A1; EC=1.2.1.3; AltName: Full=Antiquitin-1; AltName: Full=Matured fruit 60 kDa protein; Short=MF-60;	A0A453KUC2_AEGTS RecName: Full=Aldehyde dehydrogenase (NAD(+)) {ECO:0000256|ARBA:ARBA00024226}; EC=1.2.1.3 {ECO:0000256|ARBA:ARBA00024226};	At1g54100	GO:0004029,aldehyde dehydrogenase (NAD+) activity; GO:0043878,glyceraldehyde-3-phosphate dehydrogenase (NAD+) (non-phosphorylating) activity; GO:0006081,cellular aldehyde metabolic process; GO:0003674,molecular_function; GO:0003824,catalytic activity; GO:0004030,aldehyde dehydrogenase [NAD(P)+] activity; GO:0016491,oxidoreductase activity; GO:0016620,oxidoreductase activity, acting on the aldehyd…	PF00171.22:Aldehyde dehydrogenase family	--	--	--
TraesCS5B02G136400	FALSE	TRUE	TRUE	FALSE	0.62	0.9	0.76	0.76	0.75	0.35	1.14	0.746667	1.81	2.58	2.02	2.13667	0.35	0.56	0.89	0.6	5B	255972736	255976063	-	TraesCS5B02G136400	--	K01640 hydroxymethylglutaryl-CoA lyase [EC:4.1.3.4] | (RefSeq) hydroxymethylglutaryl-CoA lyase, mitochondrial-like (A)	ko00280: Valine, leucine and isoleucine degradation; ko00650: Butanoate metabolism; ko01100: Metabolic pathways; ko01110: Biosynthesis of secondary metabolites; ko04146: Peroxisome	hydroxymethylglutaryl-CoA lyase, mitochondrial-like [Aegilops tauschii subsp. tauschii]	HMGCL_ARATH RecName: Full=Hydroxymethylglutaryl-CoA lyase, mitochondrial; Short=HL; Short=HMG-CoA lyase; EC=4.1.3.4; AltName: Full=3-hydroxy-3-methylglutarate-CoA lyase;	A0A446U2Z5_TRITD RecName: Full=Hydroxymethylglutaryl-CoA lyase {ECO:0000256|ARBA:ARBA00012910}; EC=4.1.3.4 {ECO:0000256|ARBA:ARBA00012910};	At2g26800	GO:0005759,mitochondrial matrix; GO:0005739,mitochondrion; GO:0004419,hydroxymethylglutaryl-CoA lyase activity; GO:0046872,metal ion binding; GO:0046951,ketone body biosynthetic process; GO:0006552,leucine catabolic process; GO:0006629,lipid metabolic process; GO:0003674,molecular_function; GO:0003824,catalytic activity; GO:0016829,lyase activity; GO:0016830,carbon-carbon lyase activity; GO:00168…	PF00682.19:HMGL-like	--	--	--
TraesCS5B02G062500	FALSE	TRUE	FALSE	FALSE	10.38	8.14	7.74	8.75333	9.42	8.86	17.49	11.9233	6.77	6.79	6.32	6.62667	13.82	20.48	9.3	14.5333	5B	70265427	70271818	+	TraesCS5B02G062500	--	K01968 3-methylcrotonyl-CoA carboxylase alpha subunit [EC:6.4.1.4] | (RefSeq) methylcrotonoyl-CoA carboxylase subunit alpha, mitochondrial-like (A)	ko00280: Valine, leucine and isoleucine degradation; ko01100: Metabolic pathways	methylcrotonoyl-CoA carboxylase subunit alpha, mitochondrial isoform X2 [Aegilops tauschii subsp. tauschii]	MCCA_ORYSJ RecName: Full=Methylcrotonoyl-CoA carboxylase subunit alpha, mitochondrial; Short=MCCase subunit alpha; EC=6.4.1.4; AltName: Full=3-methylcrotonyl-CoA carboxylase 1; AltName: Full=3-methylcrotonyl-CoA:carbon dioxide ligase subunit alpha; Flags: Precursor;	A0A446TW18_TRITD SubName: Full=Uncharacterized protein {ECO:0000313|EMBL:VAI27529.1};	At1g03090	GO:0005759,mitochondrial matrix; GO:0005739,mitochondrion; GO:0005524,ATP binding; GO:0016421,CoA carboxylase activity; GO:0046872,metal ion binding; GO:0004485,methylcrotonoyl-CoA carboxylase activity; GO:0006552,leucine catabolic process; GO:0000166,nucleotide binding; GO:0003674,molecular_function; GO:0005488,binding; GO:0017076,purine nucleotide binding; GO:0030554,adenyl nucleotide binding; …	PF02786.17:Carbamoyl-phosphate synthase L chain, ATP binding domain	--	--	--
TraesCS5A02G493300	FALSE	FALSE	TRUE	TRUE	0.03	0.01	0.03	0.0233333	0.04	0.02	0.02	0.0266667	4.55	7.02	5.27	5.61333	5.56	4.06	4.77	4.79667	5A	662358286	662362451	+	TraesCS5A02G493300	--	K00766 anthranilate phosphoribosyltransferase [EC:2.4.2.18] | (RefSeq) anthranilate phosphoribosyltransferase, chloroplastic-like (A)	ko00400: Phenylalanine, tyrosine and tryptophan biosynthesis; ko01100: Metabolic pathways; ko01110: Biosynthesis of secondary metabolites; ko01230: Biosynthesis of amino acids	anthranilate phosphoribosyltransferase, chloroplastic [Aegilops tauschii subsp. tauschii]	TRPD_ARATH RecName: Full=Anthranilate phosphoribosyltransferase, chloroplastic; EC=2.4.2.18; Flags: Precursor;	A0A446TMF3_TRITD SubName: Full=Uncharacterized protein {ECO:0000313|EMBL:VAI24543.1};	At5g17990	GO:0009507,chloroplast; GO:0009941,chloroplast envelope; GO:0009570,chloroplast stroma; GO:0005829,cytosol; GO:0009536,plastid; GO:0004048,anthranilate phosphoribosyltransferase activity; GO:0000162,tryptophan biosynthetic process; GO:0003674,molecular_function; GO:0003824,catalytic activity; GO:0016740,transferase activity; GO:0016757,transferase activity, transferring glycosyl groups; GO:001676…	PF00591.21:Glycosyl transferase family, a/b domain	--	--	--
TraesCS5A02G440700	FALSE	FALSE	TRUE	FALSE	1.07	1.54	1.1	1.23667	0.58	0.46	0.73	0.59	0.18	0.19	0.24	0.203333	0.03	0.02	0.23	0.0933333	5A	621856077	621859649	-	TraesCS5A02G440700	--	K01695 tryptophan synthase alpha chain [EC:4.2.1.20] | (RefSeq) tryptophan synthase alpha chain-like (A)	ko00260: Glycine, serine and threonine metabolism; ko00400: Phenylalanine, tyrosine and tryptophan biosynthesis; ko01100: Metabolic pathways; ko01110: Biosynthesis of secondary metabolites; ko01230: Biosynthesis of amino acids	tryptophan synthase alpha chain-like isoform X2 [Aegilops tauschii subsp. tauschii]	TRPA2_ARATH RecName: Full=Tryptophan synthase alpha chain, chloroplastic; EC=4.2.1.20; AltName: Full=Indole-3-glycerol-phosphate lyase, chloroplastic; EC=4.1.2.8; AltName: Full=Protein TRYPTOPHAN-REQUIRING 3; Flags: Precursor;	A0A3B6KNP8_WHEAT RecName: Full=Tryptophan synthase {ECO:0000256|ARBA:ARBA00012043}; EC=4.2.1.20 {ECO:0000256|ARBA:ARBA00012043};	At4g02610	GO:0009507,chloroplast; GO:0009570,chloroplast stroma; GO:0005829,cytosol; GO:0033984,indole-3-glycerol-phosphate lyase activity; GO:0004834,tryptophan synthase activity; GO:0009851,auxin biosynthetic process; GO:0052544,defense response by callose deposition in cell wall; GO:0042742,defense response to bacterium; GO:0009630,gravitropism; GO:0000162,tryptophan biosynthetic process; GO:0003674,mol…	PF00290.20:Tryptophan synthase alpha chain	--	--	--
TraesCS5A02G226600	FALSE	TRUE	FALSE	FALSE	0.92	0.51	0.44	0.623333	0.05	0.37	0.31	0.243333	0.57	1.29	0.65	0.836667	0.07	0.1	0.23	0.133333	5A	442352306	442358392	+	TraesCS5A02G226600	ATP-dependent 6-phosphofructokinase [Source:UniProtKB/TrEMBL%3BAcc:W5EW09]	K00850 6-phosphofructokinase 1 [EC:2.7.1.11] | (RefSeq) ATP-dependent 6-phosphofructokinase 5, chloroplastic-like isoform X1 (A)	ko00010: Glycolysis / Gluconeogenesis; ko00030: Pentose phosphate pathway; ko00051: Fructose and mannose metabolism; ko00052: Galactose metabolism; ko01100: Metabolic pathways; ko01110: Biosynthesis of secondary metabolites; ko01200: Carbon metabolism; ko01230: Biosynthesis of amino acids; ko03018: RNA degradation	ATP-dependent 6-phosphofructokinase 5, chloroplastic-like isoform X1 [Aegilops tauschii subsp. tauschii]	PFKA5_ARATH RecName: Full=ATP-dependent 6-phosphofructokinase 5, chloroplastic {ECO:0000255|HAMAP-Rule:MF_03186}; Short=ATP-PFK 5 {ECO:0000255|HAMAP-Rule:MF_03186}; Short=Phosphofructokinase 5 {ECO:0000255|HAMAP-Rule:MF_03186}; EC=2.7.1.11 {ECO:0000255|HAMAP-Rule:MF_03186}; AltName: Full=Phosphohexokinase 5 {ECO:0000255|HAMAP-Rule:MF_03186}; Flags: Precursor;	A0A3B6KGH8_WHEAT RecName: Full=ATP-dependent 6-phosphofructokinase {ECO:0000256|HAMAP-Rule:MF_03186}; Short=ATP-PFK {ECO:0000256|HAMAP-Rule:MF_03186}; Short=Phosphofructokinase {ECO:0000256|HAMAP-Rule:MF_03186}; EC=2.7.1.11 {ECO:0000256|HAMAP-Rule:MF_03186}; AltName: Full=Phosphohexokinase {ECO:0000256|HAMAP-Rule:MF_03186};	At2g22480	GO:0009507,chloroplast; GO:0005737,cytoplasm; GO:0003872,6-phosphofructokinase activity; GO:0005524,ATP binding; GO:0046872,metal ion binding; GO:0006002,fructose 6-phosphate metabolic process; GO:0006096,glycolytic process; GO:0003674,molecular_function; GO:0003824,catalytic activity; GO:0008443,phosphofructokinase activity; GO:0016301,kinase activity; GO:0016740,transferase activity; GO:0016772…	PF00365.20:Phosphofructokinase	--	--	--
TraesCS5A02G188100	FALSE	TRUE	FALSE	FALSE	0.82	0.44	0.61	0.623333	0.39	0.3	0.03	0.24	1.24	1.71	0.62	1.19	0	0.27	0.37	0.213333	5A	389719370	389724310	+	TraesCS5A02G188100	--	K01689 enolase [EC:4.2.1.11] | (RefSeq) enolase 1, chloroplastic-like (A)	ko00010: Glycolysis / Gluconeogenesis; ko01100: Metabolic pathways; ko01110: Biosynthesis of secondary metabolites; ko01200: Carbon metabolism; ko01230: Biosynthesis of amino acids; ko03018: RNA degradation	enolase 1, chloroplastic [Aegilops tauschii subsp. tauschii]	ENO1_ARATH RecName: Full=Enolase 1, chloroplastic; EC=4.2.1.11; AltName: Full=2-phospho-D-glycerate hydro-lyase 1; AltName: Full=2-phosphoglycerate dehydratase 1; Flags: Precursor;	A0A3B6KG51_WHEAT RecName: Full=Phosphopyruvate hydratase {ECO:0000256|ARBA:ARBA00012058}; EC=4.2.1.11 {ECO:0000256|ARBA:ARBA00012058};	At1g74030	GO:0009507,chloroplast; GO:0009570,chloroplast stroma; GO:0000015,phosphopyruvate hydratase complex; GO:0000287,magnesium ion binding; GO:0004634,phosphopyruvate hydratase activity; GO:0006096,glycolytic process; GO:0032889,regulation of vacuole fusion, non-autophagic; GO:0010090,trichome morphogenesis; GO:0003674,molecular_function; GO:0005488,binding; GO:0043167,ion binding; GO:0043169,cation b…	PF00113.22:Enolase, C-terminal TIM barrel domain	--	--	--
TraesCS5A02G161300	FALSE	TRUE	FALSE	FALSE	1.49	1.21	1.05	1.25	0.51	1.07	0.93	0.836667	2.09	2.25	1.64	1.99333	0.77	0.85	0.8	0.806667	5A	343449889	343457807	+	TraesCS5A02G161300	--	K00058 D-3-phosphoglycerate dehydrogenase / 2-oxoglutarate reductase [EC:1.1.1.95 1.1.1.399] | (RefSeq) phosphoglycerate dehydrogenase (A)	ko00260: Glycine, serine and threonine metabolism; ko00270: Cysteine and methionine metabolism; ko01100: Metabolic pathways; ko01110: Biosynthesis of secondary metabolites; ko01200: Carbon metabolism; ko01230: Biosynthesis of amino acids	uncharacterized protein LOC109779062 [Aegilops tauschii subsp. tauschii]	FDH_ARATH RecName: Full=Formate dehydrogenase, chloroplastic/mitochondrial {ECO:0000305}; Short=FDH {ECO:0000255|HAMAP-Rule:MF_03210}; EC=1.17.1.9 {ECO:0000255|HAMAP-Rule:MF_03210, ECO:0000269|PubMed:11074273, ECO:0000269|Ref.7}; AltName: Full=NAD-dependent formate dehydrogenase {ECO:0000255|HAMAP-Rule:MF_03210}; Flags: Precursor;	A0A446SZI4_TRITD SubName: Full=Uncharacterized protein {ECO:0000313|EMBL:VAI16536.1};	At1g72190	GO:0009507,chloroplast; GO:0005829,cytosol; GO:0009326,formate dehydrogenase complex; GO:0005739,mitochondrion; GO:0009536,plastid; GO:0009579,thylakoid; GO:0008863,formate dehydrogenase (NAD+) activity; GO:0051287,NAD binding; GO:0016616,oxidoreductase activity, acting on the CH-OH group of donors, NAD or NADP as acceptor; GO:0042183,formate catabolic process; GO:0046686,response to cadmium ion;…	PF02826.19:D-isomer specific 2-hydroxyacid dehydrogenase, NAD binding domain	--	--	--
TraesCS5A02G131800	FALSE	FALSE	TRUE	TRUE	10.14	8.81	10.73	9.89333	18.7	15.61	25.2	19.8367	0.32	0.4	1.37	0.696667	0.33	0.33	0.75	0.47	5A	296724171	296727874	-	TraesCS5A02G131800	--	K01647 citrate synthase [EC:2.3.3.1] | (RefSeq) uncharacterized protein LOC123101294 (A)	ko00020: Citrate cycle (TCA cycle); ko00630: Glyoxylate and dicarboxylate metabolism; ko01100: Metabolic pathways; ko01110: Biosynthesis of secondary metabolites; ko01200: Carbon metabolism; ko01210: 2-Oxocarboxylic acid metabolism; ko01230: Biosynthesis of amino acids	hypothetical protein TRIUR3_33573 [Triticum urartu]	--	A0A446SWT8_TRITD SubName: Full=Uncharacterized protein {ECO:0000313|EMBL:VAI15587.1};	--	--	--	--	--	--
TraesCS5A02G123900	FALSE	FALSE	TRUE	FALSE	7.56	5.15	2.77	5.16	8.87	8.89	3.86	7.20667	19.87	19.28	11.74	16.9633	20.21	12.02	8.81	13.68	5A	270186992	270190181	-	TraesCS5A02G123900	--	K12524 bifunctional aspartokinase / homoserine dehydrogenase 1 [EC:2.7.2.4 1.1.1.3] | (RefSeq) bifunctional aspartokinase/homoserine dehydrogenase, chloroplastic-like isoform X1 (A)	ko00260: Glycine, serine and threonine metabolism; ko00261: Monobactam biosynthesis; ko00270: Cysteine and methionine metabolism; ko00300: Lysine biosynthesis; ko01100: Metabolic pathways; ko01110: Biosynthesis of secondary metabolites; ko01230: Biosynthesis of amino acids	uncharacterized protein LOC109748643 [Aegilops tauschii subsp. tauschii]	--	A0A446SW86_TRITD SubName: Full=Uncharacterized protein {ECO:0000313|EMBL:VAI15381.1};	--	--	--	--	--	--
TraesCS5A02G120000	FALSE	FALSE	TRUE	TRUE	0.3	0.23	0.22	0.25	0.21	0.15	0.06	0.14	3.74	5.16	3.7	4.2	6.45	5.92	5.28	5.88333	5A	253605000	253608410	-	TraesCS5A02G120000	--	K00166 2-oxoisovalerate dehydrogenase E1 component alpha subunit [EC:1.2.4.4] | (RefSeq) 2-oxoisovalerate dehydrogenase subunit alpha 2, mitochondrial-like (A)	ko00280: Valine, leucine and isoleucine degradation; ko00640: Propanoate metabolism; ko01100: Metabolic pathways; ko01110: Biosynthesis of secondary metabolites	2-oxoisovalerate dehydrogenase subunit alpha 2, mitochondrial-like [Aegilops tauschii subsp. tauschii]	ODBA2_ARATH RecName: Full=2-oxoisovalerate dehydrogenase subunit alpha 2, mitochondrial; EC=1.2.4.4; AltName: Full=Branched-chain alpha-keto acid dehydrogenase E1 component alpha chain; Short=BCKDE1A; Short=BCKDH E1-alpha; Flags: Precursor;	A0A3B6KF66_WHEAT RecName: Full=E1_dh domain-containing protein {ECO:0000259|Pfam:PF00676};	At5g09300	GO:0005947,mitochondrial alpha-ketoglutarate dehydrogenase complex; GO:0005739,mitochondrion; GO:0003863,3-methyl-2-oxobutanoate dehydrogenase (2-methylpropanoyl-transferring) activity; GO:0003826,alpha-ketoacid dehydrogenase activity; GO:0046872,metal ion binding; GO:0009083,branched-chain amino acid catabolic process; GO:0003674,molecular_function; GO:0003824,catalytic activity; GO:0016491,oxid…	PF00676.20:Dehydrogenase E1 component	--	--	--
TraesCS5A02G092600	FALSE	TRUE	FALSE	FALSE	0.37	0.43	0.41	0.403333	0.65	0.57	1.66	0.96	0.18	0.63	0.34	0.383333	1.42	1.19	1.38	1.33	5A	128426141	128430244	+	TraesCS5A02G092600	ATP-dependent 6-phosphofructokinase [Source:UniProtKB/TrEMBL%3BAcc:A0A1D5YTS4]	K00850 6-phosphofructokinase 1 [EC:2.7.1.11] | (RefSeq) ATP-dependent 6-phosphofructokinase 5, chloroplastic-like isoform X1 (A)	ko00010: Glycolysis / Gluconeogenesis; ko00030: Pentose phosphate pathway; ko00051: Fructose and mannose metabolism; ko00052: Galactose metabolism; ko01100: Metabolic pathways; ko01110: Biosynthesis of secondary metabolites; ko01200: Carbon metabolism; ko01230: Biosynthesis of amino acids; ko03018: RNA degradation	6-phosphofructokinase 5, chloroplastic [Triticum urartu]	PFKA5_ARATH RecName: Full=ATP-dependent 6-phosphofructokinase 5, chloroplastic {ECO:0000255|HAMAP-Rule:MF_03186}; Short=ATP-PFK 5 {ECO:0000255|HAMAP-Rule:MF_03186}; Short=Phosphofructokinase 5 {ECO:0000255|HAMAP-Rule:MF_03186}; EC=2.7.1.11 {ECO:0000255|HAMAP-Rule:MF_03186}; AltName: Full=Phosphohexokinase 5 {ECO:0000255|HAMAP-Rule:MF_03186}; Flags: Precursor;	A0A446ST56_TRITD RecName: Full=ATP-dependent 6-phosphofructokinase {ECO:0000256|HAMAP-Rule:MF_03186}; Short=ATP-PFK {ECO:0000256|HAMAP-Rule:MF_03186}; Short=Phosphofructokinase {ECO:0000256|HAMAP-Rule:MF_03186}; EC=2.7.1.11 {ECO:0000256|HAMAP-Rule:MF_03186}; AltName: Full=Phosphohexokinase {ECO:0000256|HAMAP-Rule:MF_03186};	At2g22480	GO:0009507,chloroplast; GO:0005737,cytoplasm; GO:0003872,6-phosphofructokinase activity; GO:0005524,ATP binding; GO:0046872,metal ion binding; GO:0006002,fructose 6-phosphate metabolic process; GO:0006096,glycolytic process; GO:0003674,molecular_function; GO:0003824,catalytic activity; GO:0008443,phosphofructokinase activity; GO:0016301,kinase activity; GO:0016740,transferase activity; GO:0016772…	PF00365.20:Phosphofructokinase	--	--	--
TraesCS5A02G053700	FALSE	TRUE	FALSE	FALSE	6.94	5.54	5.71	6.06333	6.07	6.27	7.25	6.53	3.9	4.31	3.49	3.9	7.54	11.41	4.96	7.97	5A	48889300	48895770	-	TraesCS5A02G053700	--	K01968 3-methylcrotonyl-CoA carboxylase alpha subunit [EC:6.4.1.4] | (RefSeq) methylcrotonoyl-CoA carboxylase subunit alpha, mitochondrial-like (A)	ko00280: Valine, leucine and isoleucine degradation; ko01100: Metabolic pathways	methylcrotonoyl-CoA carboxylase subunit alpha, mitochondrial isoform X2 [Aegilops tauschii subsp. tauschii]	MCCA_ORYSJ RecName: Full=Methylcrotonoyl-CoA carboxylase subunit alpha, mitochondrial; Short=MCCase subunit alpha; EC=6.4.1.4; AltName: Full=3-methylcrotonyl-CoA carboxylase 1; AltName: Full=3-methylcrotonyl-CoA:carbon dioxide ligase subunit alpha; Flags: Precursor;	A0A3B6KDJ1_WHEAT SubName: Full=Uncharacterized protein {ECO:0000313|EnsemblPlants:TraesCS5A02G053700.1};	At1g03090	GO:0005759,mitochondrial matrix; GO:0005739,mitochondrion; GO:0005524,ATP binding; GO:0016421,CoA carboxylase activity; GO:0046872,metal ion binding; GO:0004485,methylcrotonoyl-CoA carboxylase activity; GO:0006552,leucine catabolic process; GO:0000166,nucleotide binding; GO:0003674,molecular_function; GO:0005488,binding; GO:0017076,purine nucleotide binding; GO:0030554,adenyl nucleotide binding; …	PF02786.17:Carbamoyl-phosphate synthase L chain, ATP binding domain	--	--	--
TraesCS5A02G024900	FALSE	TRUE	FALSE	TRUE	36.35	35.61	45.85	39.27	27.85	57.67	43.02	42.8467	38.95	66.17	37.88	47.6667	15.42	26.5	26.66	22.86	5A	19268304	19274020	-	TraesCS5A02G024900	--	K00549 5-methyltetrahydropteroyltriglutamate--homocysteine methyltransferase [EC:2.1.1.14] | (RefSeq) 5-methyltetrahydropteroyltriglutamate-- homocysteine methyltransferase 1-like (A)	ko00270: Cysteine and methionine metabolism; ko00450: Selenocompound metabolism; ko01100: Metabolic pathways; ko01110: Biosynthesis of secondary metabolites; ko01230: Biosynthesis of amino acids	5-methyltetrahydropteroyltriglutamate--homocysteine methyltransferase 1-like [Aegilops tauschii subsp. tauschii]	METE1_ORYSJ RecName: Full=5-methyltetrahydropteroyltriglutamate--homocysteine methyltransferase 1; EC=2.1.1.14; AltName: Full=Cobalamin-independent methionine synthase 1;	A0A446SN13_TRITD RecName: Full=5-methyltetrahydropteroyltriglutamate--homocysteine S-methyltransferase {ECO:0000256|ARBA:ARBA00012034}; EC=2.1.1.14 {ECO:0000256|ARBA:ARBA00012034};	At5g17920	GO:0005829,cytosol; GO:0003871,5-methyltetrahydropteroyltriglutamate-homocysteine S-methyltransferase activity; GO:0008270,zinc ion binding; GO:0009086,methionine biosynthetic process; GO:0032259,methylation; GO:0003674,molecular_function; GO:0003824,catalytic activity; GO:0008168,methyltransferase activity; GO:0008172,S-methyltransferase activity; GO:0016740,transferase activity; GO:0016741,tran…	PF01717.18:Cobalamin-independent synthase, Catalytic domain	--	--	--
TraesCS5A02G014400	FALSE	TRUE	FALSE	FALSE	36.87	34.71	33.8	35.1267	17.24	26.59	20.73	21.52	30.69	71.2	28.8	43.5633	7.92	10.52	17.59	12.01	5A	9655139	9659910	+	TraesCS5A02G014400	--	K01689 enolase [EC:4.2.1.11] | (RefSeq) enolase-like (A)	ko00010: Glycolysis / Gluconeogenesis; ko01100: Metabolic pathways; ko01110: Biosynthesis of secondary metabolites; ko01200: Carbon metabolism; ko01230: Biosynthesis of amino acids; ko03018: RNA degradation	enolase-like isoform X2 [Aegilops tauschii subsp. tauschii]	ENO_ORYSJ RecName: Full=Enolase; EC=4.2.1.11; AltName: Full=2-phospho-D-glycerate hydro-lyase; AltName: Full=2-phosphoglycerate dehydratase; AltName: Full=OSE1;	A0A453JH85_AEGTS RecName: Full=Phosphopyruvate hydratase {ECO:0000256|ARBA:ARBA00012058}; EC=4.2.1.11 {ECO:0000256|ARBA:ARBA00012058};	At2g36530	GO:0000015,phosphopyruvate hydratase complex; GO:0000287,magnesium ion binding; GO:0004634,phosphopyruvate hydratase activity; GO:0006096,glycolytic process; GO:0032889,regulation of vacuole fusion, non-autophagic; GO:0003674,molecular_function; GO:0005488,binding; GO:0043167,ion binding; GO:0043169,cation binding; GO:0046872,metal ion binding; GO:0003824,catalytic activity; GO:0016829,lyase acti…	PF00113.22:Enolase, C-terminal TIM barrel domain	--	--	--
TraesCS4D02G356200	FALSE	TRUE	TRUE	FALSE	0.76	0.37	0.33	0.486667	0.32	0.43	0	0.25	2.44	2.24	1.11	1.93	0.06	0.81	0.15	0.34	4D	505325871	505329827	+	TraesCS4D02G356200	Branched-chain-amino-acid aminotransferase [Source:UniProtKB/TrEMBL%3BAcc:A0A1D5XYL5]	K00826 branched-chain amino acid aminotransferase [EC:2.6.1.42] | (RefSeq) branched-chain amino acid aminotransferase 2, chloroplastic-like isoform X1 (A)	ko00270: Cysteine and methionine metabolism; ko00280: Valine, leucine and isoleucine degradation; ko00290: Valine, leucine and isoleucine biosynthesis; ko00770: Pantothenate and CoA biosynthesis; ko00966: Glucosinolate biosynthesis; ko01100: Metabolic pathways; ko01110: Biosynthesis of secondary metabolites; ko01210: 2-Oxocarboxylic acid metabolism; ko01230: Biosynthesis of amino acids; ko01240: …	branched-chain-amino-acid aminotransferase 5, chloroplastic-like [Aegilops tauschii subsp. tauschii]	BCAT2_HUMLU RecName: Full=Branched-chain amino acid aminotransferase 2, chloroplastic {ECO:0000303|PubMed:23347725}; Short=HlBCAT2 {ECO:0000303|PubMed:23347725}; EC=2.6.1.42 {ECO:0000269|PubMed:23347725}; Flags: Precursor;	A0A3B6JP21_WHEAT RecName: Full=Branched-chain-amino-acid aminotransferase {ECO:0000256|RuleBase:RU004517}; EC=2.6.1.42 {ECO:0000256|RuleBase:RU004517};	At5g65780	GO:0009507,chloroplast; GO:0052656,L-isoleucine transaminase activity; GO:0052654,L-leucine transaminase activity; GO:0050048,L-leucine:2-oxoglutarate aminotransferase activity; GO:0052655,L-valine transaminase activity; GO:0009097,isoleucine biosynthetic process; GO:0009098,leucine biosynthetic process; GO:0009099,valine biosynthetic process; GO:0003674,molecular_function; GO:0003824,catalytic a…	PF01063.19:Amino-transferase class IV	--	--	--
TraesCS4D02G346900	FALSE	TRUE	FALSE	FALSE	1.93	0.99	1.01	1.31	0.94	1.66	1.49	1.36333	1.94	1.58	1.13	1.55	0.61	0.35	0.65	0.536667	4D	500716606	500719237	-	TraesCS4D02G346900	--	K01620 threonine aldolase [EC:4.1.2.48] | (RefSeq) probable low-specificity L-threonine aldolase 1 (A)	ko00260: Glycine, serine and threonine metabolism; ko01100: Metabolic pathways; ko01110: Biosynthesis of secondary metabolites; ko01230: Biosynthesis of amino acids	probable low-specificity L-threonine aldolase 1 [Aegilops tauschii subsp. tauschii]	THA1_ARATH RecName: Full=Probable low-specificity L-threonine aldolase 1; EC=4.1.2.48; AltName: Full=Threonine aldolase 1;	A0A3B6JRA2_WHEAT RecName: Full=Beta_elim_lyase domain-containing protein {ECO:0000259|Pfam:PF01212};	At3g04520	GO:0005829,cytosol; GO:0008732,L-allo-threonine aldolase activity; GO:0004793,threonine aldolase activity; GO:0006545,glycine biosynthetic process; GO:0006567,threonine catabolic process; GO:0003674,molecular_function; GO:0003824,catalytic activity; GO:0016829,lyase activity; GO:0016830,carbon-carbon lyase activity; GO:0016832,aldehyde-lyase activity; GO:0006082,organic acid metabolic process; GO…	PF01212.21:Beta-eliminating lyase	--	--	--
TraesCS4D02G256700	FALSE	TRUE	TRUE	FALSE	0.66	0.61	0.48	0.583333	0.51	0.34	0	0.283333	2.1	2.49	1.59	2.06	0.67	1.54	0.65	0.953333	4D	426518283	426524102	-	TraesCS4D02G256700	--	K01738 cysteine synthase [EC:2.5.1.47] | (RefSeq) cysteine synthase (A)	ko00270: Cysteine and methionine metabolism; ko00920: Sulfur metabolism; ko01100: Metabolic pathways; ko01110: Biosynthesis of secondary metabolites; ko01200: Carbon metabolism; ko01230: Biosynthesis of amino acids	BTB/POZ domain-containing protein NPY4-like [Aegilops tauschii subsp. tauschii]	NPY2_ARATH RecName: Full=BTB/POZ domain-containing protein NPY2; AltName: Full=Protein NAKED PINS IN YUC MUTANTS 2;	A0A453IPW6_AEGTS SubName: Full=Uncharacterized protein {ECO:0000313|EnsemblPlants:AET4Gv20637400.7};	At2g14820	GO:0071944,cell periphery; GO:0009958,positive gravitropism; GO:0016567,protein ubiquitination; GO:0008150,biological_process; GO:0009605,response to external stimulus; GO:0009606,tropism; GO:0009628,response to abiotic stimulus; GO:0009629,response to gravity; GO:0009630,gravitropism; GO:0050896,response to stimulus; GO:0006464,cellular protein modification process; GO:0006807,nitrogen compound …	PF03000.14:NPH3 family	--	--	--
TraesCS4D02G158900	FALSE	TRUE	TRUE	FALSE	3.06	4.78	2.84	3.56	6.29	5.71	5.44	5.81333	1.38	2.55	1.98	1.97	8.3	5.6	5.43	6.44333	4D	224432677	224449530	+	TraesCS4D02G158900	--	K00873 pyruvate kinase [EC:2.7.1.40] | (RefSeq) pyruvate kinase isozyme A, chloroplastic-like isoform X1 (A)	ko00010: Glycolysis / Gluconeogenesis; ko00620: Pyruvate metabolism; ko01100: Metabolic pathways; ko01110: Biosynthesis of secondary metabolites; ko01200: Carbon metabolism; ko01230: Biosynthesis of amino acids	uncharacterized protein LOC109757285 [Aegilops tauschii subsp. tauschii]	--	A0A453HZ63_AEGTS SubName: Full=Uncharacterized protein {ECO:0000313|EnsemblPlants:AET4Gv20367600.1};	At1g50020	GO:0016021,integral component of membrane; GO:0005575,cellular_component; GO:0016020,membrane; GO:0031224,intrinsic component of membrane; GO:0110165,cellular anatomical entity	--	--	--	--
TraesCS4B02G390500	FALSE	FALSE	TRUE	FALSE	0.53	0.56	0.3	0.463333	0.51	0.17	1.47	0.716667	1.81	1.46	1.38	1.55	0.53	1.68	0.78	0.996667	4B	666581148	666586473	-	TraesCS4B02G390500	--	K00872 homoserine kinase [EC:2.7.1.39] | (RefSeq) DNA (cytosine-5)-methyltransferase DRM2-like (A)	ko00260: Glycine, serine and threonine metabolism; ko01100: Metabolic pathways; ko01110: Biosynthesis of secondary metabolites; ko01230: Biosynthesis of amino acids	DNA (cytosine-5)-methyltransferase DRM2-like [Aegilops tauschii subsp. tauschii]	DRM2_ORYSJ RecName: Full=DNA (cytosine-5)-methyltransferase DRM2 {ECO:0000305}; EC=2.1.1.37 {ECO:0000305}; AltName: Full=OsDRM2 {ECO:0000303|PubMed:22380881}; AltName: Full=Protein DOMAINS REARRANGED METHYLASE 2 {ECO:0000305};	A0A3B6J021_WHEAT RecName: Full=SAM-dependent MTase DRM-type domain-containing protein {ECO:0000259|PROSITE:PS51680};	At5g15380	GO:0005634,nucleus; GO:0003886,DNA (cytosine-5-)-methyltransferase activity; GO:0003677,DNA binding; GO:0003674,molecular_function; GO:0003824,catalytic activity; GO:0008168,methyltransferase activity; GO:0008757,S-adenosylmethionine-dependent methyltransferase activity; GO:0009008,DNA-methyltransferase activity; GO:0016740,transferase activity; GO:0016741,transferase activity, transferring one-c…	PF00145.17:C-5 cytosine-specific DNA methylase	--	--	--
TraesCS4B02G353100	FALSE	FALSE	FALSE	TRUE	5.94	5.59	4.62	5.38333	5.2	5.45	16.3	8.98333	3.51	2.59	4.25	3.45	3.75	0.92	2.94	2.53667	4B	644789857	644795141	-	TraesCS4B02G353100	3-hydroxy-3-methylglutaryl coenzyme A synthase [Source:UniProtKB/TrEMBL%3BAcc:A0A341UJR1]	K01641 hydroxymethylglutaryl-CoA synthase [EC:2.3.3.10] | (RefSeq) uncharacterized protein LOC123093812 (A)	ko00280: Valine, leucine and isoleucine degradation; ko00650: Butanoate metabolism; ko00900: Terpenoid backbone biosynthesis; ko01100: Metabolic pathways; ko01110: Biosynthesis of secondary metabolites	hydroxymethylglutaryl-CoA synthase-like [Aegilops tauschii subsp. tauschii]	HMCS_ARATH RecName: Full=Hydroxymethylglutaryl-CoA synthase; Short=HMG-CoA synthase; EC=2.3.3.10; AltName: Full=3-hydroxy-3-methylglutaryl coenzyme A synthase; AltName: Full=Protein EMBRYO DEFECTIVE 2778; AltName: Full=Protein FLAKY POLLEN 1;	A0A446SIH2_TRITD RecName: Full=3-hydroxy-3-methylglutaryl coenzyme A synthase {ECO:0000256|RuleBase:RU364071}; Short=HMG-CoA synthase {ECO:0000256|RuleBase:RU364071}; EC=2.3.3.10 {ECO:0000256|RuleBase:RU364071};	At4g11820	GO:0005829,cytosol; GO:0009506,plasmodesma; GO:0004421,hydroxymethylglutaryl-CoA synthase activity; GO:0006084,acetyl-CoA metabolic process; GO:0010142,farnesyl diphosphate biosynthetic process, mevalonate pathway; GO:0019287,isopentenyl diphosphate biosynthetic process, mevalonate pathway; GO:0016126,sterol biosynthetic process; GO:0003674,molecular_function; GO:0003824,catalytic activity; GO:00…	PF08540.10:Hydroxymethylglutaryl-coenzyme A synthase C terminal	--	--	--
TraesCS4B02G288100	FALSE	FALSE	TRUE	FALSE	15	14.71	13.7	14.47	4.11	6.39	18.08	9.52667	8.61	3.2	7.58	6.46333	5.03	3.8	2.98	3.93667	4B	573273107	573276702	+	TraesCS4B02G288100	Alanine--glyoxylate aminotransferase 2 homolog 1%2C mitochondrial [Source:Projected from Arabidopsis thaliana (AT4G39660) UniProtKB/Swiss-Prot%3BAcc:Q940M2]	K00827 alanine-glyoxylate transaminase / (R)-3-amino-2-methylpropionate-pyruvate transaminase [EC:2.6.1.44 2.6.1.40] | (RefSeq) alanine--glyoxylate aminotransferase 2 homolog 1, mitochondrial (A)	ko00250: Alanine, aspartate and glutamate metabolism; ko00260: Glycine, serine and threonine metabolism; ko00270: Cysteine and methionine metabolism; ko00280: Valine, leucine and isoleucine degradation; ko01100: Metabolic pathways; ko01110: Biosynthesis of secondary metabolites	alanine-glyoxylate aminotransferase [Triticum aestivum]	AGT21_ARATH RecName: Full=Alanine--glyoxylate aminotransferase 2 homolog 1, mitochondrial; EC=2.6.1.44; AltName: Full=Beta-alanine-pyruvate aminotransferase 1; Flags: Precursor;	A0A3B6ITH3_WHEAT SubName: Full=Uncharacterized protein {ECO:0000313|EnsemblPlants:TraesCS4B02G288100.1};	At4g39660	GO:0005739,mitochondrion; GO:0005886,plasma membrane; GO:0005774,vacuolar membrane; GO:0008453,alanine-glyoxylate transaminase activity; GO:0030170,pyridoxal phosphate binding; GO:0008270,zinc ion binding; GO:0009853,photorespiration; GO:0046686,response to cadmium ion; GO:0003674,molecular_function; GO:0003824,catalytic activity; GO:0008483,transaminase activity; GO:0016740,transferase activity;…	PF00202.21:Aminotransferase class-III	--	--	--
[truncated: 99 more rows]
