# Supplementary material for: Integrated Metabolome and Transcriptome Analyses Reveal Amino Acid Biosynthesis Mechanisms during the Physiological Maturity of Grains in Yunnan Hulled Wheat (Triticum aestivum ssp. yunnanense King)
Source: Int J Mol Sci. 2023 Aug 30;24(17):13475. doi: 10.3390/ijms241713475 (PMC10487551; doi:10.3390/ijms241713475)
Supplement: Supplementary file 1 [file ijms-24-13475-s001.zip › Table S13.xlsx]

## Sheet: Table S13
Table S13. Differentially expressed genes in two Yunnan hulled wheat lines during grain development (mean FPKM).
ID	DWG	DMG	YWG	YMG	Regulation
TraesCSU02G159400	0.00333333	0.0233333	4.6	10.3	up
TraesCSU02G044300	0.44	0.963333	4.23	8.48333	up
TraesCS7D02G396300	11.1167	28.2967	17.4467	27.7267	up
TraesCS7D02G382200	22.3433	60.03	32.64	60.32	up
TraesCS7D02G170500	3.43333	7.79	2.54667	5.64333	up
TraesCS7D02G096700	1.03333	2.87333	2.51667	3.95667	up
TraesCS7B02G308800	3.05667	7.02333	3.52333	7.86667	up
TraesCS7B02G074400	3.55667	7.21667	2.62333	5.51	up
TraesCS7A02G505800	3.51333	8.24333	1.81333	3.28	up
TraesCS7A02G409100	2.16667	5.55333	4.17333	10.0967	up
TraesCS7A02G392800	6.16	12.0233	3.81	4.61667	up
TraesCS7A02G385600	94.8133	293.92	108.147	266.97	up
TraesCS6D02G272400	18.9167	22.17	8.02667	11.77	up
TraesCS6D02G251000	9.55	25.61	10.64	20.22	up
TraesCS6D02G225800	10.2933	16.3367	8.72	17.66	up
TraesCS6D02G074300	20.3567	56.42	33.1	51.5	up
TraesCS6D02G063500	3.14667	8.04667	3.33667	4.85	up
TraesCS6D02G041600	6.68	17.05	10.7833	25.4733	up
TraesCS6D02G030800	0.0833333	0.433333	0.153333	0.256667	up
TraesCS6B02G321400	4.29333	7.01333	0.12	0.513333	up
TraesCS6B02G281600	3.52	7.99333	4.03	8.52	up
TraesCS6B02G185400	2.97333	7.18	3.84667	6.48667	up
TraesCS6B02G108100	19.66	66.5033	35.6833	60.6	up
TraesCS6B02G103100	1.21667	4.62667	1.58333	3.21	up
TraesCS6B02G074900	0.613333	2.62	0.536667	0.776667	up
TraesCS6B02G074700	0	0.79	1.41	2.44667	up
TraesCS6A02G305400	23.27	60.6967	55.99	126.813	up
TraesCS6A02G080600	8.98	29.1833	18.9633	37.1367	up
TraesCS6A02G077100	1.19333	2.90333	1.11	1.53333	up
TraesCS6A02G073700	0.583333	1.70333	0.226667	0.39	up
TraesCS6A02G061000	1.25667	4.66667	1.77667	2.89	up
TraesCS6A02G036000	10.8167	18.4433	0.38	0.71	up
TraesCS6A02G027100	0.00333333	0.03	0.75	1.29667	up
TraesCS6A02G006600	0.32	1.89333	0.403333	0.873333	up
TraesCS5D02G543700	0.833333	1.34	0.213333	0.48	up
TraesCS5D02G487000	1.26333	2.95667	1.97	3.11	up
TraesCS5D02G437200	16.26	43.3867	13.59	24.4667	up
TraesCS5D02G425700	0.34	0.953333	0.176667	0.53	up
TraesCS5D02G416800	2.67667	4.54	3.32	7.84	up
TraesCS5D02G407800	12.5433	35.96	22.04	42.9867	up
TraesCS5D02G386800	8.68	19.26	7.51	18.7233	up
TraesCS5D02G254100	5.23333	11.31	1.18333	3.89667	up
TraesCS5D02G127300	0.24	1.08333	0.343333	1.36667	up
TraesCS5D02G126700	1.95333	2.89333	1.91333	3.98667	up
TraesCS5D02G057900	0.31	0.88	0.276667	0.55	up
TraesCS5B02G505800	0.923333	2.03667	1.05667	1.21333	up
TraesCS5B02G420000	0.526667	1.65667	1.92333	2.33	up
TraesCS5B02G416700	17.7633	22.3633	44.59	47.45	up
TraesCS5B02G403400	4.69667	9.43	11.5633	18.9233	up
TraesCS5B02G380400	4.48667	11.8467	4.77	8.33667	up
TraesCS5B02G372500	1.93667	4.89	3.37	7.37667	up
TraesCS5B02G331100	5.36333	12.6433	4.06	7.33	up
TraesCS5B02G244800	3.18	8.25333	1.02667	2.14333	up
TraesCS5B02G210100	8.74	13.7567	11.6367	23.75	up
TraesCS5B02G120100	6.42667	28.32	4.29667	13.17	up
TraesCS5B02G062500	8.75333	11.9233	6.62667	14.5333	up
TraesCS5A02G501800	8.35333	25.1133	15.7867	26.6633	up
TraesCS5A02G490100	0.283333	1.05333	0.146667	0.3	up
TraesCS5A02G398300	6.73333	16.0167	13.1567	24.41	up
TraesCS5A02G376700	1.98333	8.44	3.16	5.53	up
TraesCS5A02G247800	1.78	6.07333	1.27	3.41	up
TraesCS5A02G247600	5.41333	14.8767	1.56333	5.57333	up
TraesCS5A02G123900	5.16	7.20667	16.9633	13.68	up
TraesCS5A02G092600	0.403333	0.96	0.383333	1.33	up
TraesCS5A02G053700	6.06333	6.53	3.9	7.97	up
TraesCS4D02G347100	3.91667	10.45	4.04667	4.12667	up
TraesCS4D02G327200	12.08	31.59	17.04	30.8833	up
TraesCS4D02G259900	4.96667	15.8467	4.01	8.79	up
TraesCS4D02G213500	2.53667	7.32333	3.30667	7.66	up
TraesCS4D02G158900	3.56	5.81333	1.97	6.44333	up
TraesCS4D02G107400	0.286667	0.833333	0.113333	1.20667	up
TraesCS4D02G047500	7.36667	19.7733	10.4333	16.0833	up
TraesCS4D02G047400	19.2833	100.363	42.8533	232.773	up
TraesCS4D02G045300	1.11333	3.77667	1.60333	4.84667	up
TraesCS4D02G014300	147.847	344.17	240.727	365.57	up
TraesCS4B02G330300	15.1733	46.6167	23.1	50.88	up
TraesCS4B02G321900	0.16	0.996667	0.19	0.27	up
TraesCS4B02G285000	5.67333	11.73	5.68333	7.43667	up
TraesCS4B02G260200	5.07667	28.9567	5.54333	16.3867	up
TraesCS4B02G212500	3.26667	8.11333	5.14333	11.1467	up
TraesCS4B02G165500	8.43333	17.7167	4.68	6.65667	up
TraesCS4B02G047400	34.4033	102.427	29.6867	90.22	up
TraesCS4B02G045400	0.346667	4.28	0.966667	4.74333	up
TraesCS4A02G401400	5.37667	10.0767	5.81	14.8333	up
TraesCS4A02G366700	0.35	0.946667	0.923333	1.07	up
TraesCS4A02G297800	166.707	360.75	291.683	409.61	up
TraesCS4A02G268800	5.08333	9.47	7.3	16.0367	up
TraesCS4A02G266900	40.0167	62.4367	38.24	78.05	up
TraesCS4A02G234400	4.45	10.38	9.35333	12.66	up
TraesCS4A02G212400	0.646667	1.77333	1.07333	1.11667	up
TraesCS4A02G106500	0.476667	1.64667	0.84	1.99333	up
TraesCS4A02G091900	5.36667	11.5367	7.46333	11.37	up
TraesCS4A02G045100	6.10333	29.03	10.72	25.5933	up
TraesCS4A02G021700	1.01667	2.88333	0.44	0.963333	up
TraesCS4A02G019100	5.46333	14.4267	5.59667	10.6133	up
TraesCS3D02G378700	2.89	6.17667	2.98	4.50333	up
TraesCS3D02G286900	2.70333	11.7133	6.19667	26.83	up
TraesCS3D02G276400	3.96667	6.72667	3.97333	8.50333	up
TraesCS3D02G266400	0.493333	1.67	1.51667	2.32333	up
TraesCS3D02G189400	5.10333	10.7067	4.79667	8.34667	up
TraesCS3D02G175100	3.59333	9.25667	4.52333	8.71667	up
TraesCS3D02G007500	0.09	0.143333	1.19	1.83667	up
TraesCS3D02G005500	19.55	44.42	40.6233	60.2	up
TraesCS3B02G538100	9.89667	25.1933	18.22	25.0567	up
TraesCS3B02G417800	7.91	11.6267	4.35667	6.88	up
TraesCS3B02G392500	1.97333	8.99333	2.59667	5.82	up
TraesCS3B02G299800	0.363333	0.686667	0.406667	0.99	up
TraesCS3B02G215100	4.79	11.7333	9.26667	15.7333	up
TraesCS3B02G008700	7.31667	17.5767	6.79333	17.27	up
TraesCS3A02G274000	3.4	3.76	1.77667	2.46667	up
TraesCS3A02G247500	0.01	1.05	0	0.263333	up
TraesCS3A02G020300	16.4133	20.9067	8.38	8.96	up
TraesCS3A02G017800	2.28667	4.64667	8.63333	16.2367	up
TraesCS3A02G003800	20.83	52.0433	22.4933	41.2333	up
TraesCS2D02G395700	0.123333	0.556667	0.0366667	0.383333	up
TraesCS2D02G177500	7.74667	10.9033	5.50667	12.07	up
TraesCS2D02G109900	6.34667	13.4267	8.02667	10.42	up
TraesCS2D02G034900	5.27	13.8567	7.31333	15.54	up
TraesCS2B02G378300	3.99	8.66333	6.69333	7.93667	up
TraesCS2B02G308500	3.12333	8.48333	5.05333	9.3	up
TraesCS2B02G127700	9.53	21.06	9.22333	13.64	up
TraesCS2B02G002100	16.5	39.89	15.7867	29.0233	up
TraesCS2A02G398000	0.00666667	0.67	0.0333333	0.52	up
TraesCS2A02G170000	8.44	9.99667	6.47667	12.9033	up
TraesCS2A02G109700	7.49667	22.2033	11.17	18.05	up
TraesCS2A02G035700	3.49	15.0067	2.39333	5.12667	up
TraesCS1D02G396100	0.0166667	0.34	0.0366667	0.49	up
TraesCS1D02G325300	2.08	2.56667	0.776667	0.786667	up
TraesCS1D02G222300	17.8733	38.99	31.7333	46.03	up
TraesCS1D02G160400	1.23333	2.67	0.163333	0.706667	up
TraesCS1D02G067800	20.45	29.02	16.26	35.32	up
TraesCS1D02G062800	9.26333	20.5033	10.42	21.2267	up
TraesCS1B02G465800	4.52667	4.98333	6.06333	12.9067	up
TraesCS1B02G391900	1.07333	2.31	8.03667	8.86333	up
TraesCS1B02G124900	3.42	8.36	4.87667	8.31	up
TraesCS1B02G090600	3.84667	10.6233	6.99667	8.34333	up
TraesCS1B02G080400	1.00667	7.65667	2.62333	6.69333	up
TraesCS1A02G260600	0.513333	0.68	0.73	2.17333	up
TraesCS1A02G195500	0.466667	2.57333	0.24	1.23333	up
TraesCS1A02G190800	12.1533	31.4467	16.0767	24.73	up
TraesCS1A02G072200	3.84667	8.44	7.67333	7.68333	up
TraesCS1A02G061700	3.48	8.88333	2.22	3.44333	up
novel.9393	0.0833333	0.456667	1.06667	1.23667	up
novel.8563	6.54333	7.23333	0.44	1.72667	up
novel.7784	1.33	5.72667	2.02667	3.93	up
novel.6761	0.0633333	0.22	2.92333	4.86	up
novel.4617	5.73667	12.0567	9.13333	11.67	up
novel.3857	3.05667	8.50667	4.60333	19.02	up
novel.2592	0.0333333	0.146667	0.206667	0.766667	up
novel.22922	0.166667	0.973333	0.44	0.98	up
novel.20292	7.47	35.5733	5.77	20.0367	up
novel.19952	0.0733333	0.93	0.0566667	0.11	up
novel.19368	0.6	2.82	0.06	0.92	up
novel.19367	0	7.79	0.26	8.27	up
novel.1834	1.32333	2.97333	0.616667	1.17333	up
novel.18134	0.243333	0.876667	0.23	1.55	up
novel.16652	0.806667	2.15333	0.126667	0.22	up
novel.1556	0.246667	1.29333	0.643333	0.823333	up
novel.15248	0.276667	1.28333	3.05	6.50667	up
novel.14473	0.333333	2.93	0.836667	1.39667	up
novel.14408	0.24	1.05333	0.136667	0.37	up
novel.13690	2.02333	10.6033	1.49667	2.24333	up
novel.13250	1.6	1.61333	0.763333	1.6	up
novel.1181	1.58333	2.08667	0	0.0133333	up
novel.10370	15.3	48.0733	16.9633	49.39	up
TraesCS7D02G474700	4.02333	1.79333	3.25333	2.24667	down
TraesCS7D02G223000	4.23	0.89	1.79667	0.73	down
TraesCS7D02G208100	1.58667	1.06	2.17667	0.976667	down
TraesCS7D02G180600	8.38667	1.78	7.44333	7.21	down
TraesCS7B02G294800	7.85333	3.44667	4.88	3.32	down
TraesCS7A02G488200	9.42667	4.37333	9.88	7.17667	down
TraesCS7A02G370500	3.41667	1.74333	3.98	2.44	down
TraesCS7A02G345600	7.87667	2.32667	5.5	2.92667	down
TraesCS7A02G219100	9.03	3.25	14.86	8.73	down
TraesCS7A02G205200	1.49667	0.886667	2.98333	1.19	down
TraesCS7A02G184600	0.61	0.3	2.25333	1.14667	down
TraesCS7A02G178500	9.62333	1.17333	15.1833	9.78667	down
TraesCS6D02G358700	7.73	1.44667	11.0167	1.79667	down
TraesCS6D02G296400	47.2867	2.16667	22.8767	1.97	down
TraesCS6D02G296300	11.9933	0.06	6.83667	0.123333	down
TraesCS6D02G296200	29.4033	0.603333	43.44	2.09333	down
TraesCS6D02G296100	45.9533	0.06	35.5933	0.196667	down
TraesCS6D02G230100	13.15	6.82	8.52	8.83667	down
TraesCS6D02G230000	5.28	1.87	4.16667	1.92333	down
TraesCS6D02G196300	32.33	15.1	39.0067	13.6367	down
TraesCS6D02G136700	1.51	0.126667	0.773333	0.323333	down
TraesCS6D02G065600	0.873333	0.223333	0.333333	0.01	down
TraesCS6D02G063600	0.866667	0.493333	1.14	0.183333	down
TraesCS6B02G440200	16.53	15.7733	11.0967	7.24	down
TraesCS6B02G412300	6.4	1.90667	16.2767	1.94333	down
TraesCS6B02G347400	11.27	0.11	8.79667	0.34	down
TraesCS6B02G347300	17.3533	0.04	7.98667	0	down
TraesCS6B02G347200	59.4367	0.373333	91.0867	3.48333	down
TraesCS6B02G347100	50.0633	0.0533333	24.4933	0.06	down
TraesCS6B02G276800	5.7	1.90333	4.14	1.38667	down
TraesCS6B02G276700	15.83	5.26667	13.98	4.55333	down
TraesCS6B02G247900	2.15333	0.82	2.95667	1.26667	down
TraesCS6B02G243700	31.6767	19.89	47.28	15.5633	down
TraesCS6B02G175700	2.92667	2.68	4.69	2.06	down
TraesCS6B02G086000	1.20333	1.10667	2.9	1.37333	down
TraesCS6B02G084400	6.52333	2.41667	5.46667	1.65667	down
TraesCS6A02G374600	11.1833	1.54667	19.18	2.75	down
TraesCS6A02G316900	23.2567	0.0633333	18.84	0.323333	down
TraesCS6A02G316800	11.27	0.0466667	7.50667	0.156667	down
TraesCS6A02G316700	59.3167	0.276667	71.44	0.453333	down
TraesCS6A02G316600	41.9233	0.05	34.4233	0.193333	down
TraesCS6A02G248000	8.38	3.39667	7.99667	4.93667	down
TraesCS6A02G247900	3.56667	1.44	2.82333	1.36	down
TraesCS6A02G239600	0.953333	0.243333	0.516667	0.513333	down
TraesCS6A02G218300	1.63	0.436667	1.60667	0.99	down
TraesCS6A02G169300	138.08	80.1333	149.603	62.1233	down
TraesCS5D02G331100	7.84333	2.66667	8.48667	3.42667	down
TraesCS5D02G254300	9.92	6.41667	4.44333	3.42	down
TraesCS5D02G181600	4.06333	2.06333	5.50333	1.90333	down
TraesCS5D02G139300	120.317	31.7233	98.1667	31.4533	down
TraesCS5D02G019800	50.49	41.1333	56.2367	24.22	down
TraesCS5B02G419300	4.32	1.41333	2	1.33667	down
TraesCS5B02G389000	13.9067	5.39	9.69667	6.71	down
TraesCS5B02G245100	7.99333	3.38667	2.05667	1.03333	down
TraesCS5B02G152600	18.3667	4.73667	10.2733	9.12667	down
TraesCS5B02G136400	0.76	0.746667	2.13667	0.6	down
TraesCS5B02G131500	170.59	45.87	84.88	38.1567	down
TraesCS5B02G121400	14.5667	7.21667	8.14	5.86	down
TraesCS5A02G440700	1.23667	0.59	0.203333	0.0933333	down
TraesCS5A02G324200	6.14333	1.58333	12.0367	8.57667	down
TraesCS5A02G226600	0.623333	0.243333	0.836667	0.133333	down
TraesCS5A02G188100	0.623333	0.24	1.19	0.213333	down
TraesCS5A02G177400	3.53667	1.67667	5.77333	2.08	down
TraesCS5A02G161300	1.25	0.836667	1.99333	0.806667	down
TraesCS5A02G137700	2.11667	0.973333	3.62	0.876667	down
TraesCS5A02G134000	110.09	35.79	97.8067	30.79	down
TraesCS5A02G014400	35.1267	21.52	43.5633	12.01	down
TraesCS4D02G356200	0.486667	0.25	1.93	0.34	down
TraesCS4D02G256700	0.583333	0.283333	2.06	0.953333	down
TraesCS4D02G204800	2.84667	1.27	1.82333	1.02667	down
TraesCS4B02G288100	14.47	9.52667	6.46333	3.93667	down
TraesCS4B02G256600	0.893333	0.373333	2.5	0.99	down
TraesCS4B02G125000	9.54333	4.36333	14.19	6.61667	down
TraesCS4A02G298700	2.48	1.35	3.07333	1.36667	down
TraesCS4A02G131900	35.7	18.04	15.6	1.70333	down
TraesCS4A02G129600	5.56	2.18667	4.24	3.93	down
TraesCS4A02G048200	1.98667	0.853333	5.13333	1.21667	down
TraesCS3D02G418400	4.23333	2.06	5.07333	1.66	down
TraesCS3D02G383700	19.5367	4.31667	50.7967	7.51333	down
TraesCS3D02G353600	2.21333	0.893333	2.04333	0.93	down
TraesCS3D02G331500	9.1	2.83667	12.5533	4.68667	down
TraesCS3D02G239500	1.86333	1.52	2.32667	1.13333	down
TraesCS3D02G083400	1.90333	0.76	1.38	0.366667	down
TraesCS3D02G077300	152.333	52.6733	127.59	47.15	down
TraesCS3B02G458800	5.39	2.09	4.58333	1.98	down
TraesCS3B02G422900	76.69	49.64	199.237	70.55	down
TraesCS3B02G395900	0.903333	0.37	1.92333	0.453333	down
TraesCS3B02G392100	2.17333	0.893333	1.54333	0.59	down
TraesCS3B02G325800	2.65333	1.48	2.90333	0.913333	down
TraesCS3B02G292900	8.25333	3.00667	5.86333	5.06	down
TraesCS3B02G267800	1.98	1.13333	2.36	1.08	down
TraesCS3B02G259800	0.85	0.48	1.30333	0.326667	down
TraesCS3B02G097800	1.47	0.213333	1.59667	0.22	down
TraesCS3B02G006100	3.46	1.62	3.62	3.33667	down
TraesCS3B02G000400	1.59	0.46	1.22	0.923333	down
TraesCS3A02G423200	7.35	2.64	6.33667	3.71667	down
TraesCS3A02G391100	15.95	9.91667	45.6967	13.8467	down
TraesCS3A02G363700	1.04667	0.946667	3.75	0.566667	down
TraesCS3A02G359400	1.18333	0.443333	3.4	0.686667	down
TraesCS3A02G310300	3.06	1.40333	10.4767	3.76333	down
TraesCS3A02G291100	4.96333	2.07667	2.45667	1.70333	down
TraesCS3A02G196700	5.99333	2.59667	5.4	3.50333	down
TraesCS3A02G195300	32.6733	11.0367	23.8933	10.7467	down
TraesCS3A02G001500	1.74	1.67333	2.33	1.04667	down
TraesCS2D02G601500	2.33667	0.786667	1.45667	0.35	down
TraesCS2D02G561700	26.14	11.3533	63.0033	19.5	down
TraesCS2D02G412800	3.06333	0.446667	1.43	0.29	down
TraesCS2D02G386700	1.30333	0.333333	0.776667	0.423333	down
TraesCS2D02G280700	1.45	0.47	1.26	0.61	down
TraesCS2D02G210300	2.08667	0.3	11.86	0.42	down
TraesCS2B02G598600	6.02333	0.876667	3.81	0.656667	down
TraesCS2B02G591300	29.69	15.5833	61.9633	18.6467	down
TraesCS2B02G389100	6.07333	2.25333	6.00667	3.92	down
TraesCS2B02G350500	19.6267	8.33	11.7033	9.45667	down
TraesCS2B02G233100	0.466667	0	3.27667	0.07	down
TraesCS2B02G090100	16.34	7.7	11.24	8.93333	down
TraesCS2A02G593000	11.6967	5	23.4133	6.13667	down
TraesCS2A02G415800	3.59333	0.656667	2.17667	0.443333	down
TraesCS2A02G397900	1.66	0.82	2.24333	0.956667	down
TraesCS2A02G382700	8.34667	1.44667	3.87667	0.976667	down
TraesCS2A02G377000	2.21667	0.796667	0.986667	0.8	down
TraesCS2A02G372000	26.3367	4.27667	23.22	7.06667	down
TraesCS2A02G331700	9.63333	2.52333	7.78667	5.38667	down
TraesCS2A02G205900	1.87	0	14.0733	0.323333	down
TraesCS2A02G028900	0.276667	1.05667	0.0166667	0.0166667	down
TraesCS2A02G014300	8.43	3.24667	9.23667	4.98	down
TraesCS1D02G430300	2.70333	2.62667	9.92	9.76	down
TraesCS1D02G292100	1.29	0.753333	2.28333	0.966667	down
TraesCS1D02G280700	8.26333	2.7	9.93667	4.01	down
TraesCS1D02G211700	2.59	1.53333	2.73	1.25	down
TraesCS1D02G188500	2.49	0.216667	1.31667	0.163333	down
TraesCS1D02G142700	1.11333	0.5	1.53667	0.466667	down
TraesCS1D02G086700	21.2733	11.8367	46.01	12.7667	down
TraesCS1B02G308900	2.1	1.23667	2.93333	1.00667	down
TraesCS1B02G292900	1.22667	0.496667	1.84667	0.826667	down
TraesCS1B02G290600	6.70667	2.60667	5.90333	3.19333	down
TraesCS1B02G195800	1.81	0.63	1.27	0.663333	down
TraesCS1B02G102700	24.9967	14.77	41.52	14.75	down
TraesCS1A02G382800	4.63333	2.18333	5.93667	3.69333	down
TraesCS1A02G283700	0.553333	0.353333	1.73333	1.15333	down
TraesCS1A02G281400	7.97	3.81	9.42333	4.31333	down
TraesCS1A02G208500	3.22333	1.70333	3.32	1.41	down
TraesCS1A02G188000	1.48333	0.45	1.16333	0.213333	down
TraesCS1A02G085600	12.5433	7.55667	23.8833	9.12667	down
novel.9377	0.173333	0.03	3.36	0.606667	down
novel.768	0.49	0.436667	1.38	0.9	down
novel.6942	1.86	0.39	0.62	0.243333	down
novel.647	1.24	0.666667	2.33333	0.896667	down
novel.6062	1.74333	0.56	1.89333	0.6	down
novel.5938	3.88	1.10667	5.21333	1.85333	down
novel.5924	6.08667	2.79	5.9	4.88667	down
novel.28008	0.05	0	4.18	1.9	down
novel.27582	0.56	0.08	6.04667	1.76333	down
novel.25110	1.99	0.353333	0.463333	0.23	down
novel.24853	8.75	2.45667	8.54333	4.40667	down
novel.24677	1.91667	0.756667	2.17667	2.14	down
novel.22013	1.52	0.71	1.80667	0.253333	down
novel.21593	5.87	2.74667	7.35667	2.66333	down
novel.20222	4.12333	0.813333	4.61333	0.62	down
novel.19812	5.52333	1.96333	5.29667	3.46333	down
novel.1940	1.06	0.526667	1.95333	0.6	down
novel.17942	0.19	0.13	3.56333	2.60667	down
novel.1667	3.32333	1.67	3.31667	2.26333	down
novel.15771	0.0166667	0	1.82667	0.91	down
novel.15688	1.69667	1.12333	0.34	0.22	down
novel.13404	0.03	0.00666667	0.88	0.76	down
novel.12358	0.933333	0.533333	0.696667	0.526667	down
novel.11784	1.97333	1.09667	2.34333	0.996667	down
novel.1129	1.83	0.98	1.80333	0.72	down
novel.10562	3.52667	1.24333	4.72	2.16333	down
TraesCSU02G164100	0.133333	0.0466667	0.603333	1.03333
TraesCS7B02G084300	14.5733	3.52	14.23	15.7733
TraesCS7A02G179500	0.74	0.32	0.0733333	0.363333
TraesCS7A02G102800	0.0166667	0.03	3.61333	1.97667
TraesCS6B02G393600	0.66	1.14333	4.01333	2.64333
TraesCS6B02G327500	18.9267	39.7733	15.97	14.71
TraesCS6B02G101600	0.126667	0.783333	1.48333	1.41
TraesCS6B02G099000	0.113333	0.133333	0.46	0.4
TraesCS6B02G054700	0.8	1.15667	0.113333	0.1
TraesCS6A02G163300	0.403333	0.663333	1.12333	0.46
TraesCS6A02G007600	0.123333	0.343333	0.806667	0.786667
TraesCS5D02G461500	0.593333	0.933333	1.89667	1.52333
TraesCS5D02G252100	11.0567	5.98667	1.64333	2.18667
TraesCS5D02G159100	42.1933	11.5233	24.89	41.1
TraesCS5B02G447700	1.39	1.36333	0.556667	0.85
TraesCS5A02G493300	0.0233333	0.0266667	5.61333	4.79667
TraesCS5A02G429100	4.27	9.92667	0.546667	0.126667
TraesCS5A02G358000	2.13333	0.983333	1.18333	1.40333
TraesCS5A02G153900	35.0867	14.3767	24.8267	56.29
TraesCS5A02G131800	9.89333	19.8367	0.696667	0.47
TraesCS5A02G120000	0.25	0.14	4.2	5.88333
TraesCS5A02G024900	39.27	42.8467	47.6667	22.86
TraesCS4D02G346900	1.31	1.36333	1.55	0.536667
TraesCS4D02G236800	2.69667	1.33333	0.336667	0.623333
TraesCS4B02G390500	0.463333	0.716667	1.55	0.996667
TraesCS4B02G353100	5.38333	8.98333	3.45	2.53667
TraesCS4B02G240900	0.983333	3.28	0.73	0.45
TraesCS4B02G235400	2.55	0.436667	0.236667	0.246667
TraesCS4B02G098300	5.23667	6.04	4.10667	2.63333
TraesCS4A02G387000	1.63667	1.64667	2.16	1.02333
TraesCS4A02G219900	23.1333	24.2233	11.6633	10.1067
TraesCS4A02G063800	0.49	1.64333	0.783333	0.586667
TraesCS4A02G059800	1.49667	0.656667	0.266667	0.653333
TraesCS4A02G036400	1.58667	2.09667	0.396667	0.393333
TraesCS4A02G021200	0.123333	0.976667	0.533333	0.516667
TraesCS3D02G010000	0.0133333	0.13	1.15667	1.00667
TraesCS3B02G234000	24.2333	22.2233	0.12	0.183333
TraesCS3B02G025200	1.47	1.51667	24.6333	22.2067
TraesCS2D02G331200	15.33	7.2	8.58333	9.89667
TraesCS2B02G609800	2.41333	2.47667	7.01	6.66333
TraesCS2B02G400000	9.07333	6.66	4.25667	5.17667
TraesCS2B02G309000	4.85333	4.03333	1.30333	2.39667
TraesCS2B02G196300	16.2467	16.1733	7.1	15.03
TraesCS2A02G036300	2.26333	2.76333	0.11	0.0366667
TraesCS1D02G218300	0.506667	0.406667	0.08	0.106667
TraesCS1B02G446500	7.67	10.6367	7.48333	3.02
TraesCS1B02G337400	1.42667	2.01333	0.836667	0.506667
TraesCS1B02G104200	2.75667	1.13333	0.97	1.51667
TraesCS1A02G428400	0.816667	0.52	2.32333	2.78333
TraesCS1A02G061600	0.1	1.56333	0.0266667	0.0233333
novel.5256	8.78667	1.75667	1.08	1.28
novel.24654	0.01	0.453333	2.69333	2.04333
novel.21181	4.47667	3.39333	7.56	10.6767
novel.19106	0.72	2.32	0.346667	0.256667
novel.18056	12.0767	2.66333	1.06333	1.56333
novel.16774	2.18	2.93333	17.3033	11.5333
novel.167	12.9867	6.32667	0.55	1.03333
novel.14062	3.61	1.62	2.4	9.59667
novel.1327	0.1	0.31	7.60667	5.08
novel.12731	0.986667	3.30333	2.05667	0.643333
novel.10424	0.9	1.06667	2.50667	1.70333
